# Supplementary material
Source: PubMed Central journal article supplement (PMC3536903)
Supplement: supp_M112.020651_mcp.M112.020651-2.pdf [file supp_M112.020651_mcp.M112.020651-2.pdf]

**Supplemental Fig. S1: Manual annotation of AGE and ubiquitin modified peptides in the mass spectras of identified PRPs**

**Modifications and their corresponding  $\Delta M$  listed as below:**

1. Carboxy methyl lysine (CML) : +58.0055 Da
2. Carboxyethyllysine (CEL) : +72.0211 Da
3. Pyrraline (Pyr) : +108.0211 Da
4. 1-alkyl-2-formyl-3,4-glycosyl-pyrrole (AFGP) : +270.074 Da
5. Glycation (Gly): +162.02 Da
6. Imidazolone-A ( ImiA): 144.03 Da
7. Methyl glyoxal lysine dimer (MOLD): +49.0078 Da
8. Crossline: +252.11 Da
9. Pentosidine (Pento): +58.03 Da
10. Ubiquitin (Ubi): +144.02 Da

GAPDH

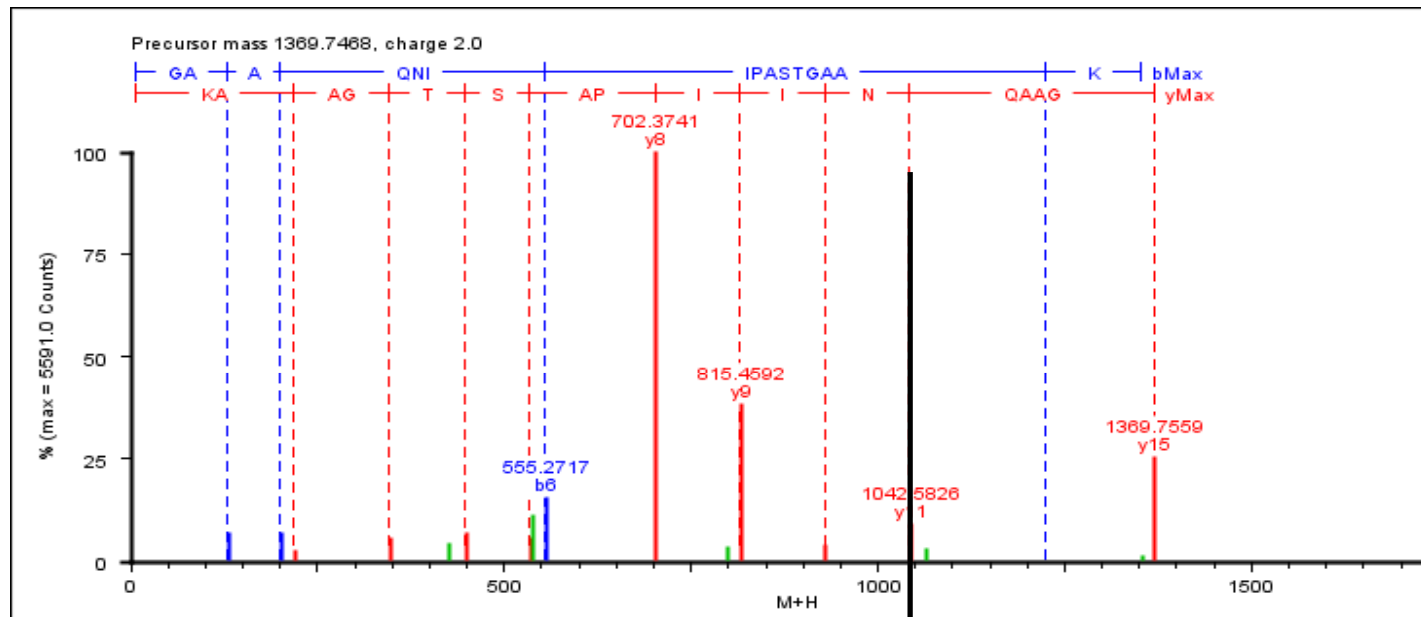

1042.5826

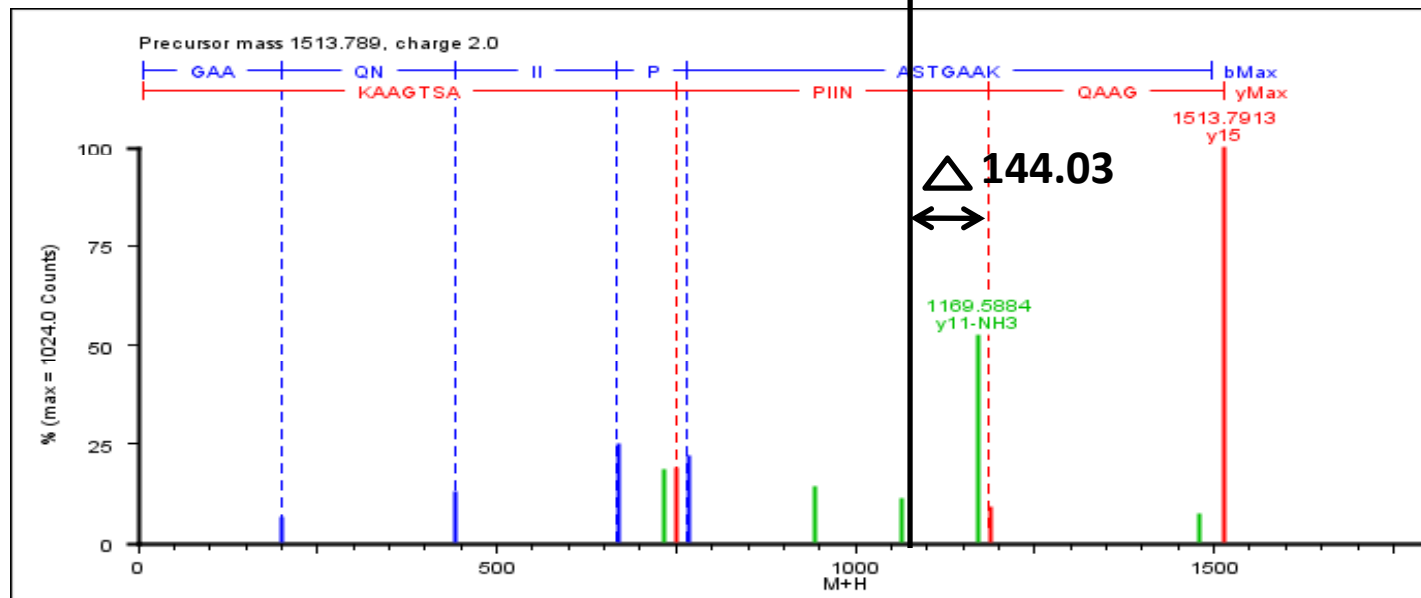

1186.6035

199-213

GAAQNIIPASTGAAK(ImiA) : 144.03

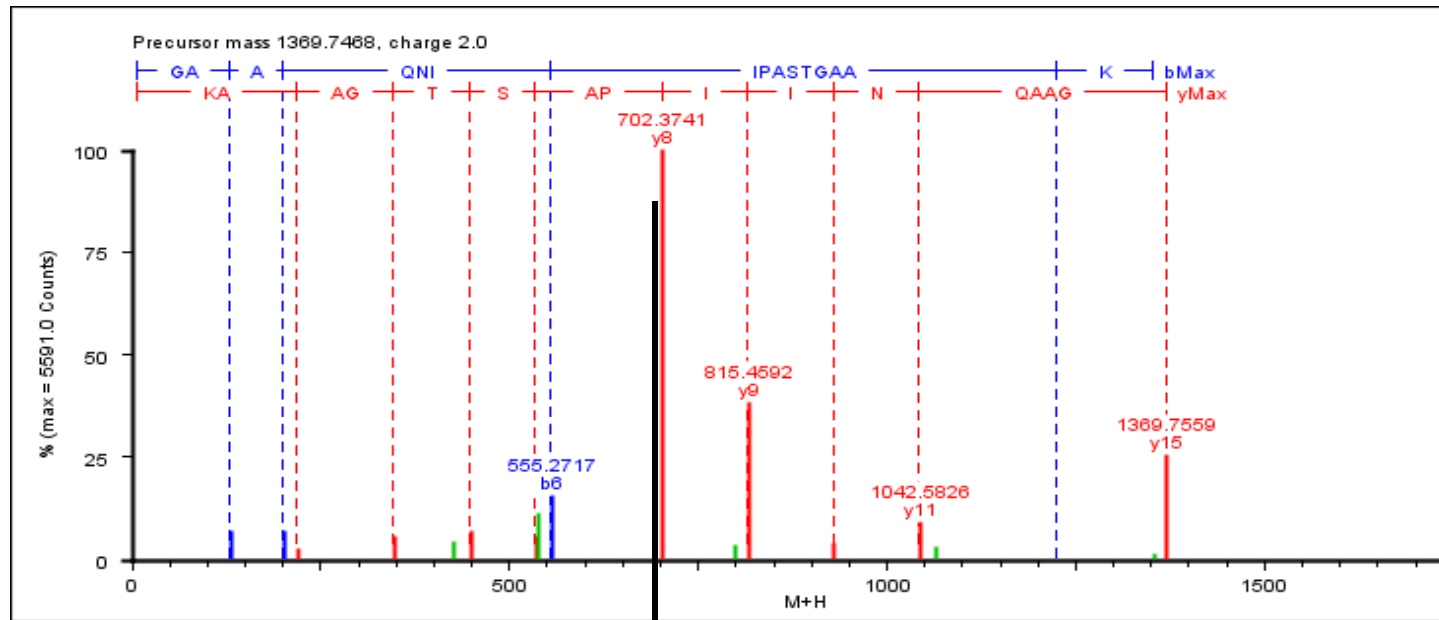

702.3741

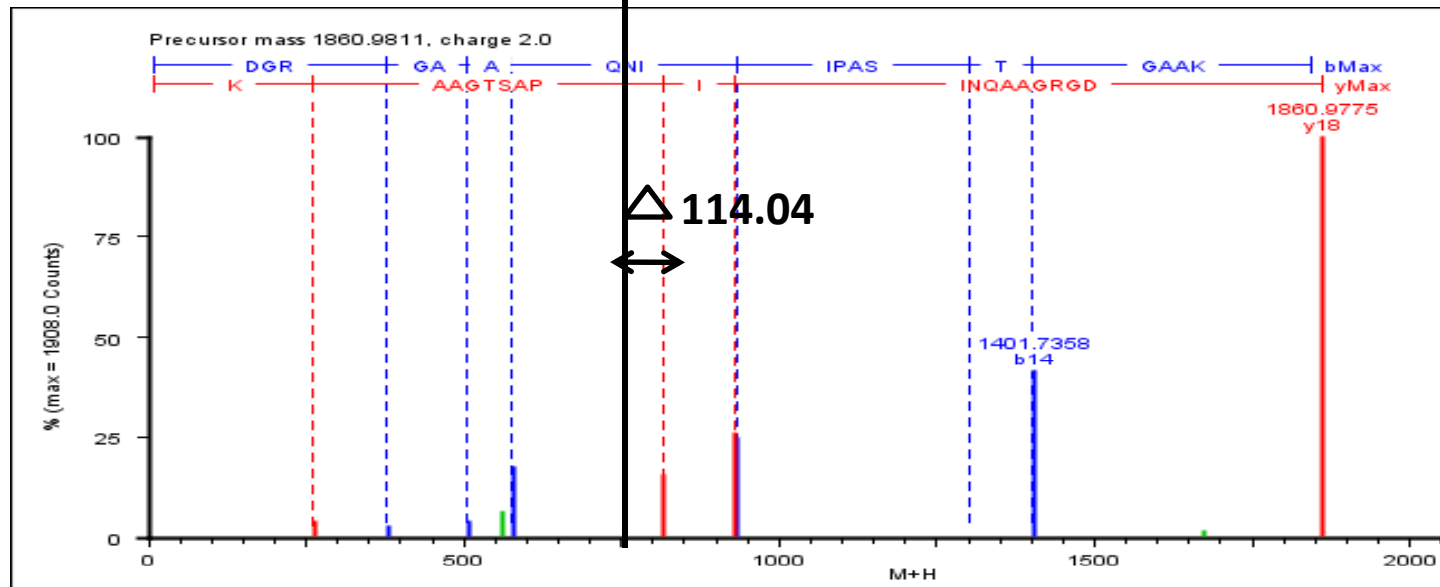

816.4489

196-213

(R)DGRGAAQNIIPASTGAAK(Ubi)(A)

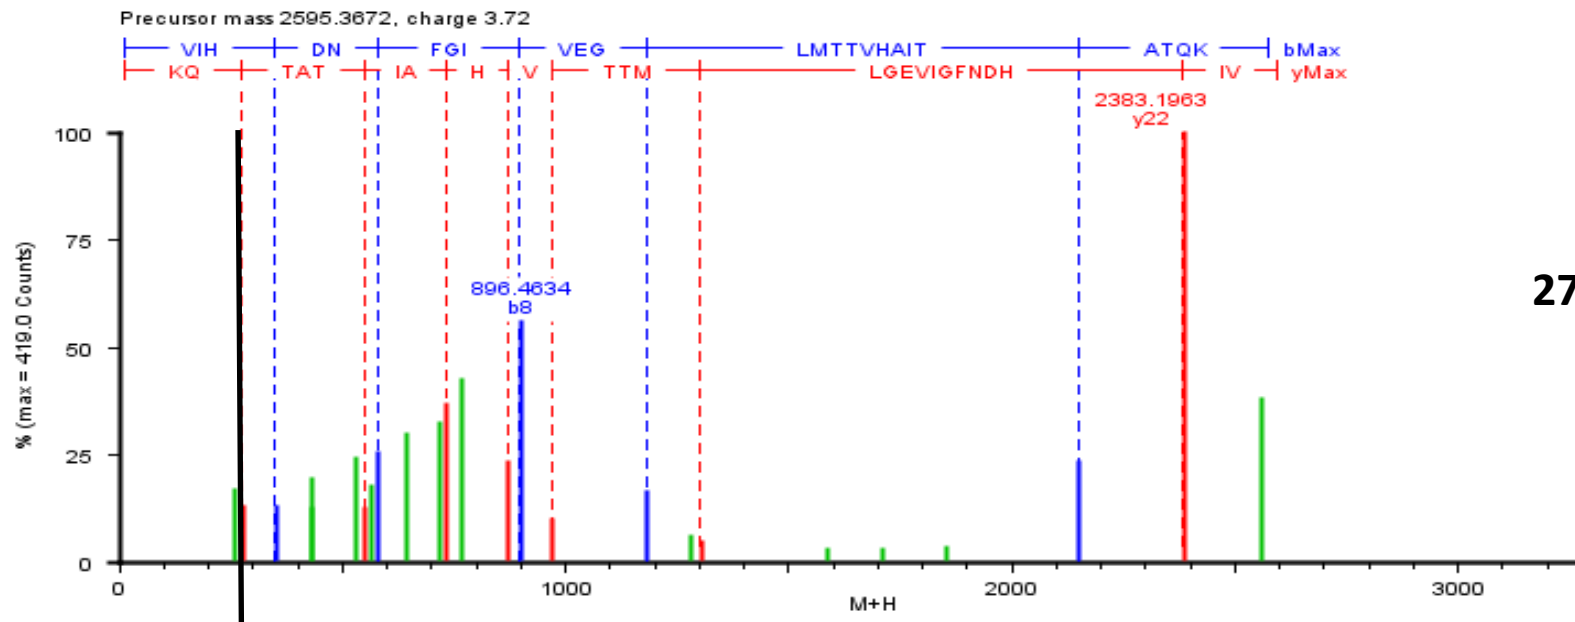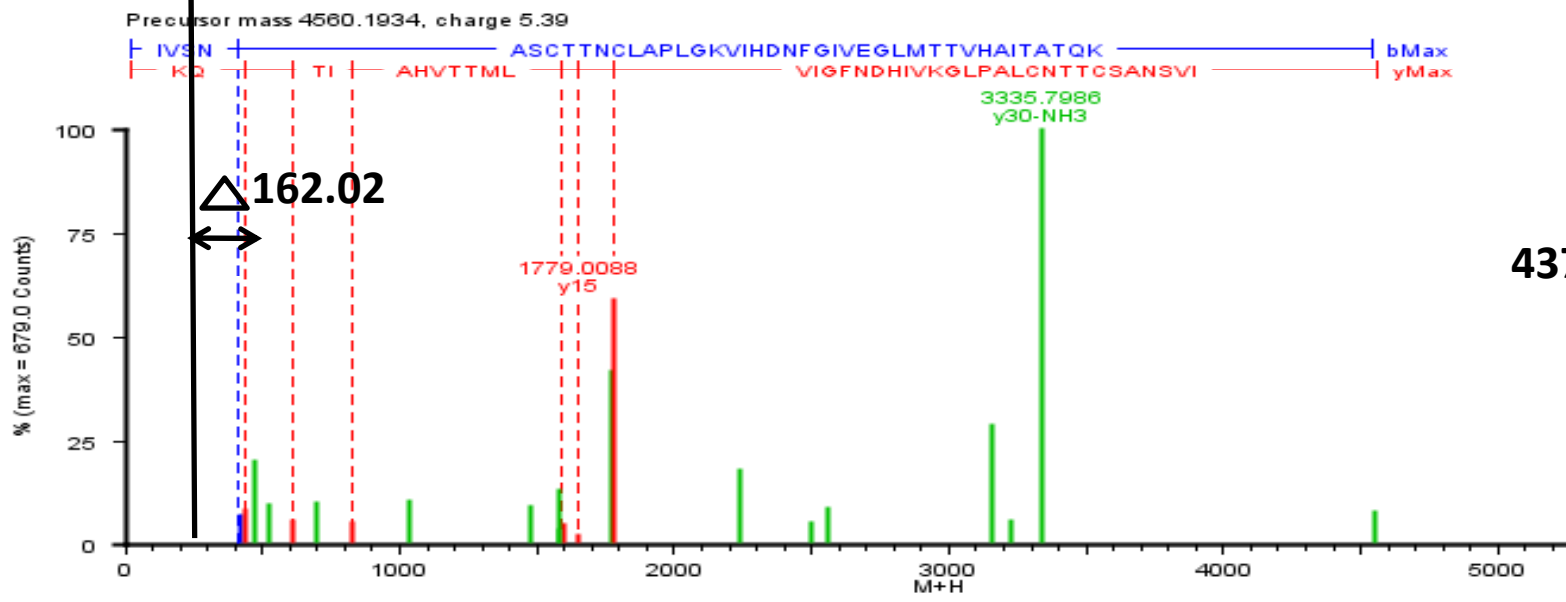

144-184

IVSNASCTTNCLAPLGKVIHDNFGIVEGLMTTVHAIATQK(Gly) : 162.02

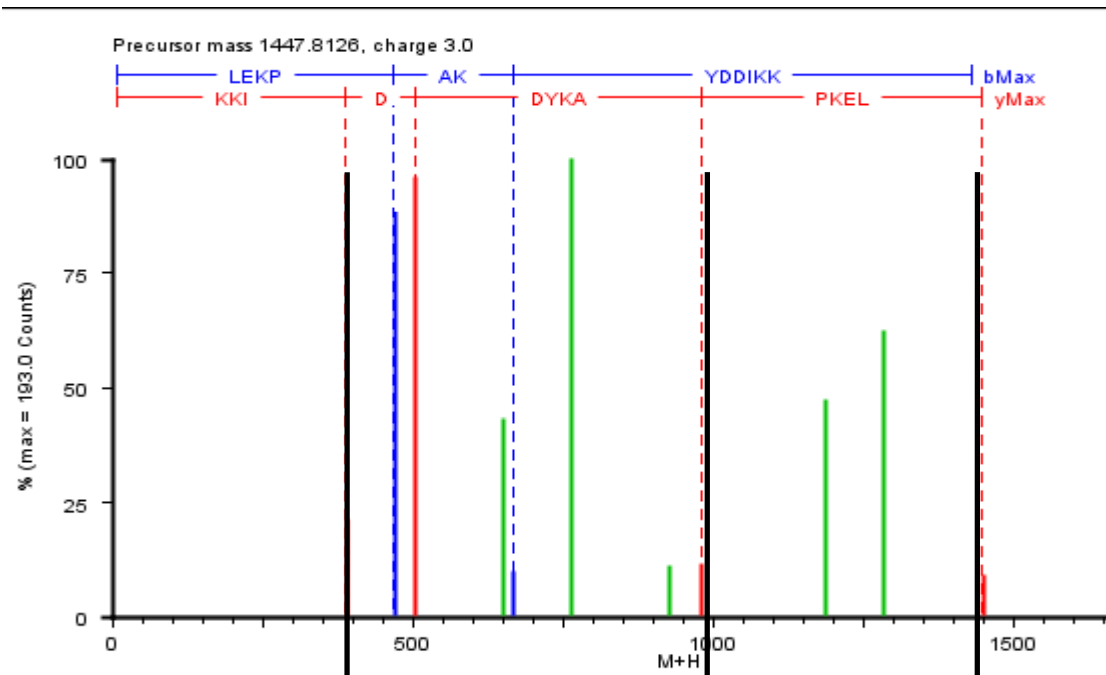

1447.8386

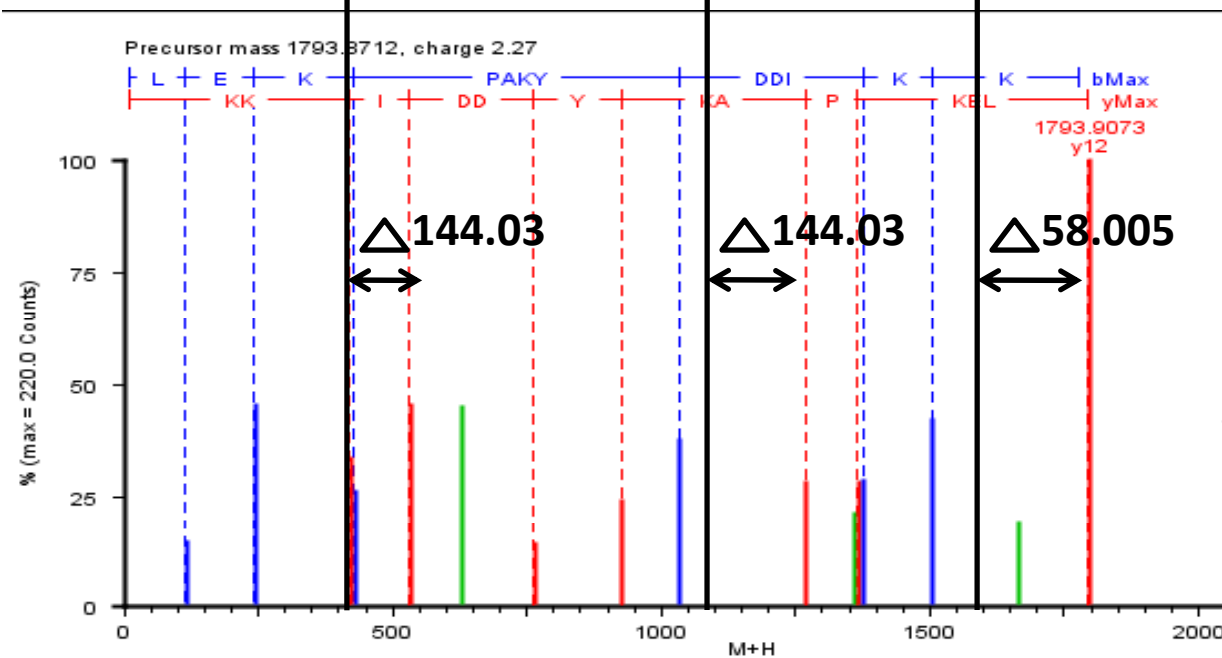

1793.9073:  
(1447.8386+144.03  
+144.03+58.005)

247-258

(R)LEK(CML)PAK(ImiA)YDDIKK(ImiA)(V)

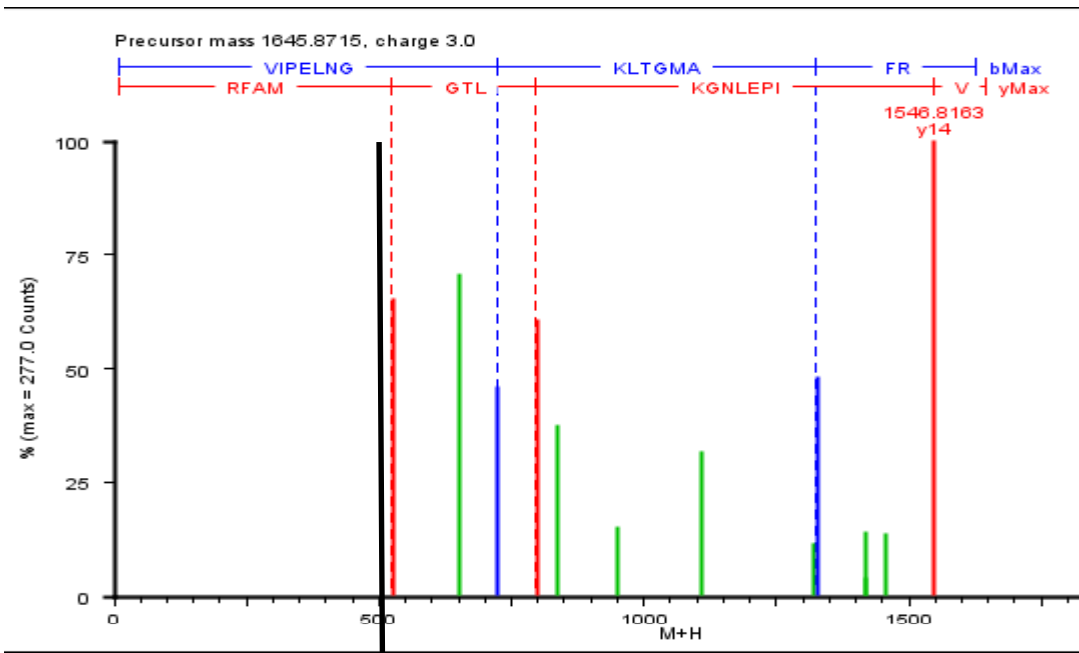

524.3024

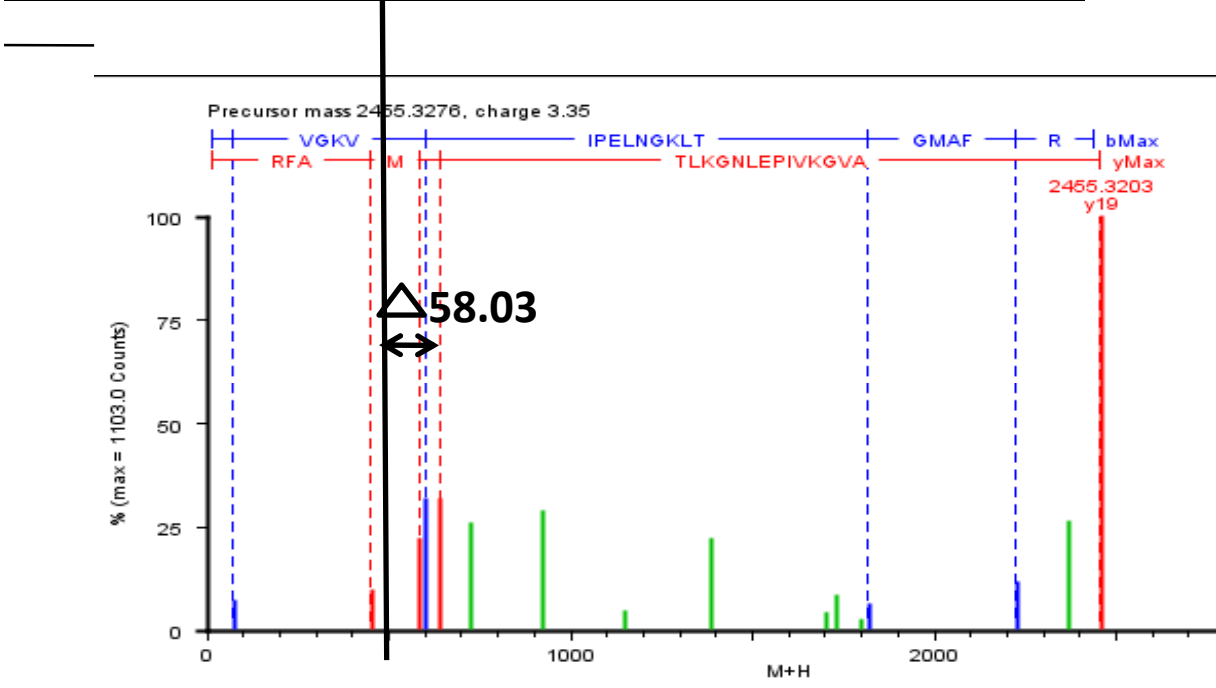

582.2783:  
(524.3024+ 58.03)

214-232 —(K)AVGKVIPELNGKLTGMAFR(Pento)(V)

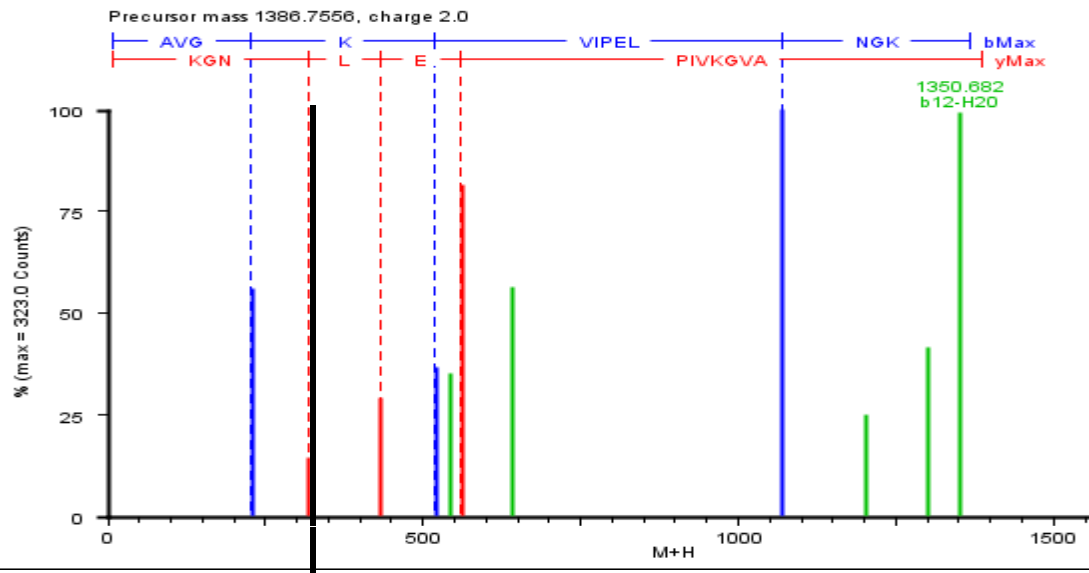

318.1508

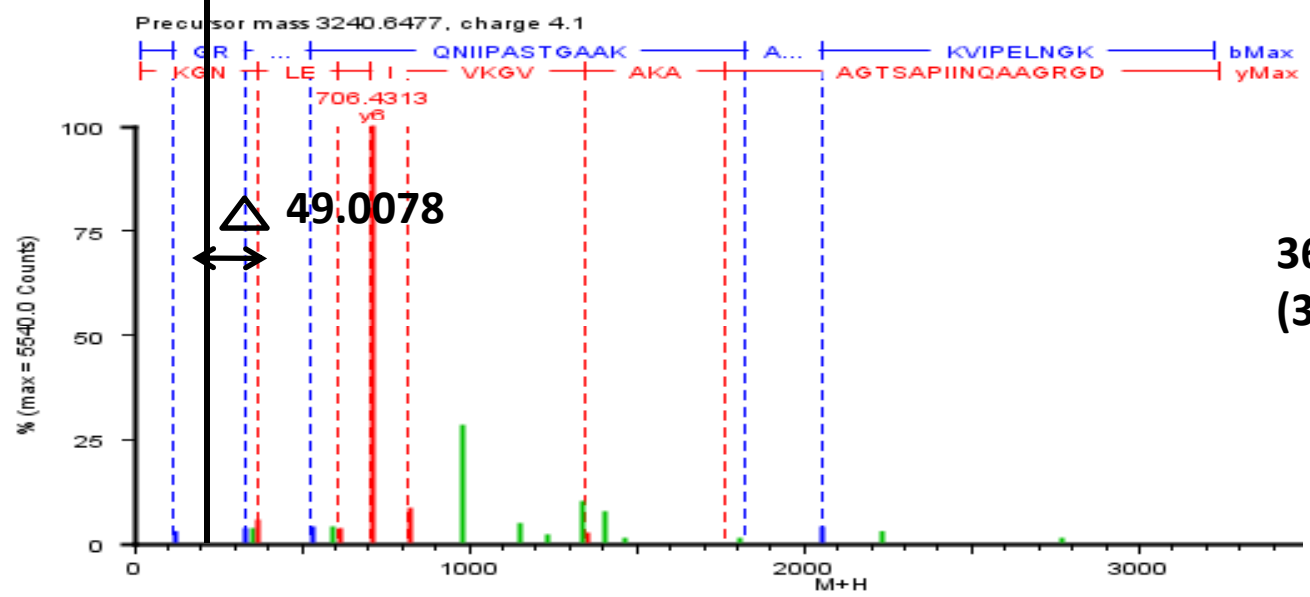

367.2148:  
(318.15+49.0)

(R)DGRGAAQNIIPASTGAAKAVGKVIPELNGK(MOLD)(L)



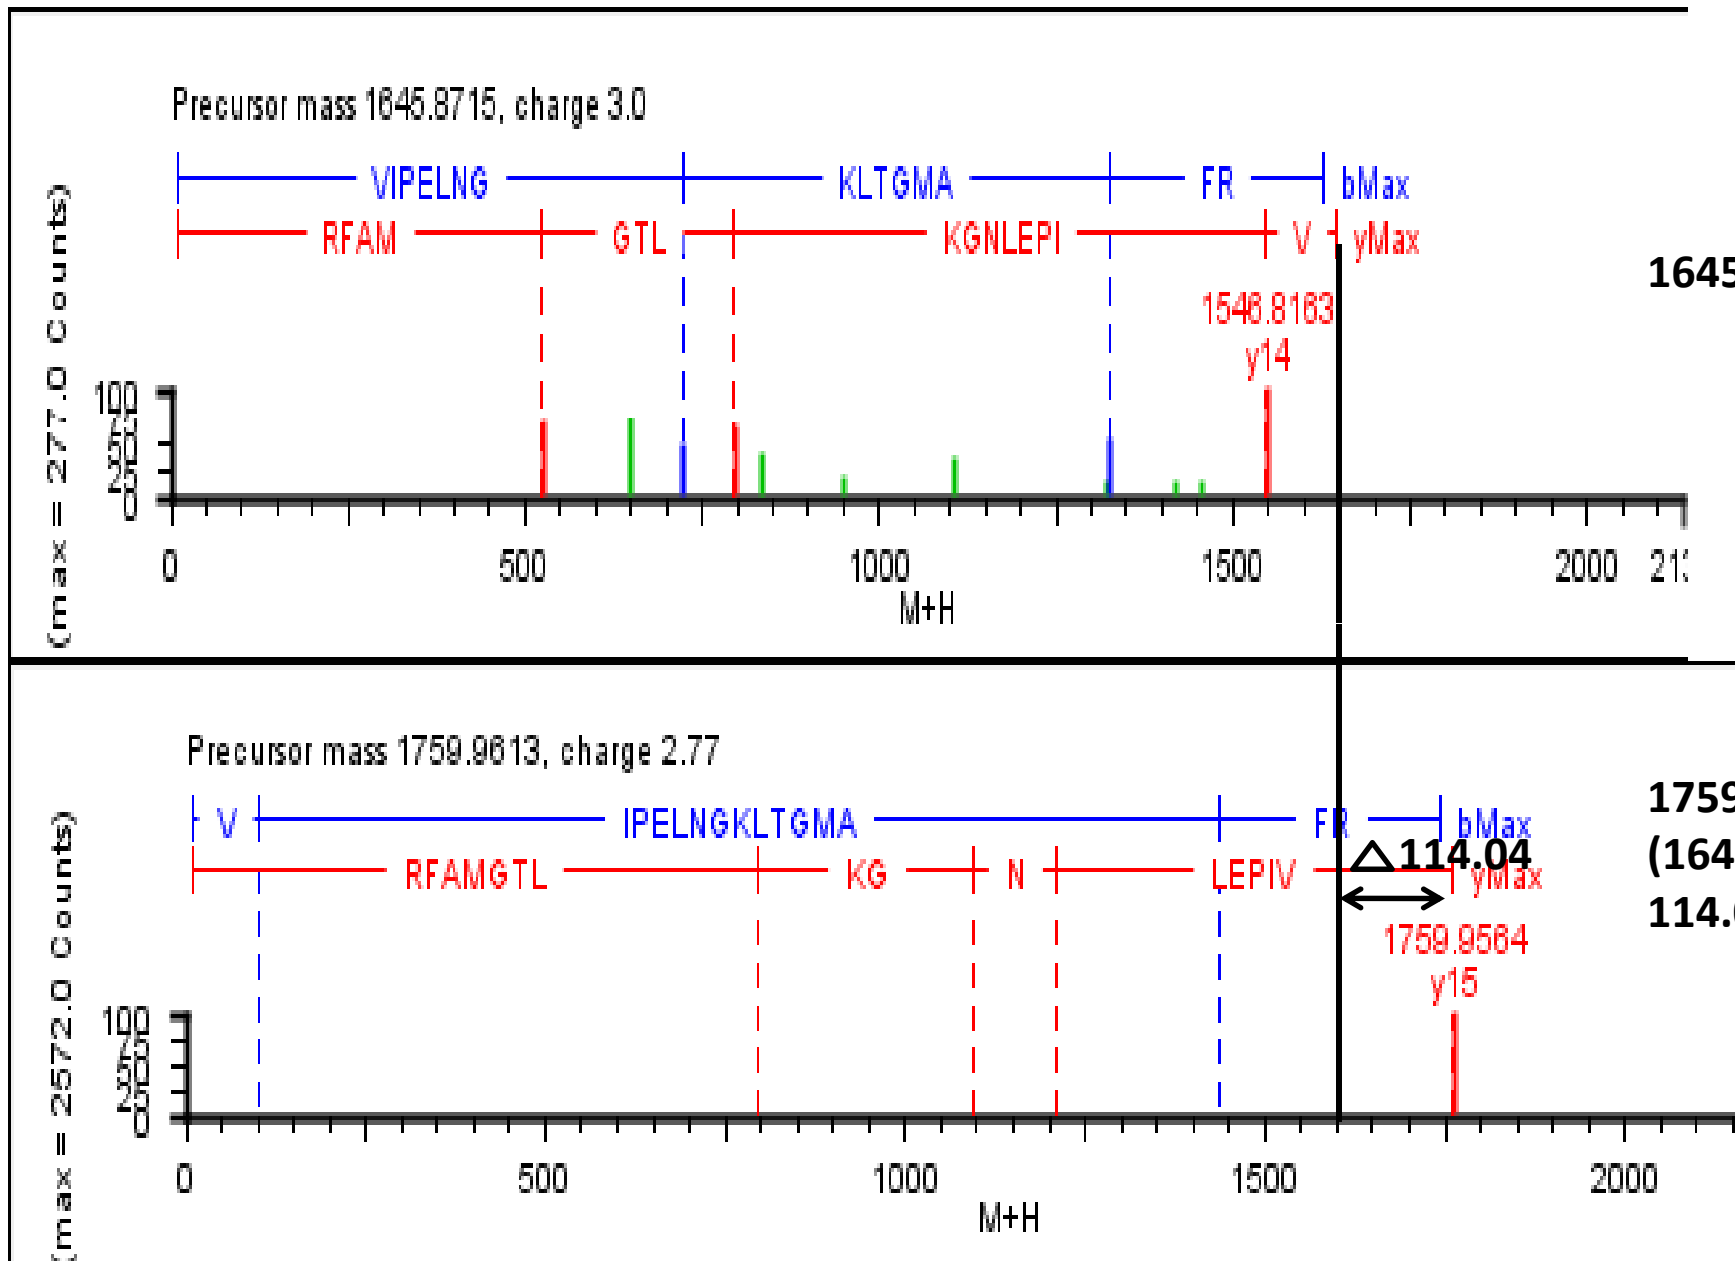

218-232

(K)VIPELNGK(Ubi)LTGMAFR(V)

HSP60

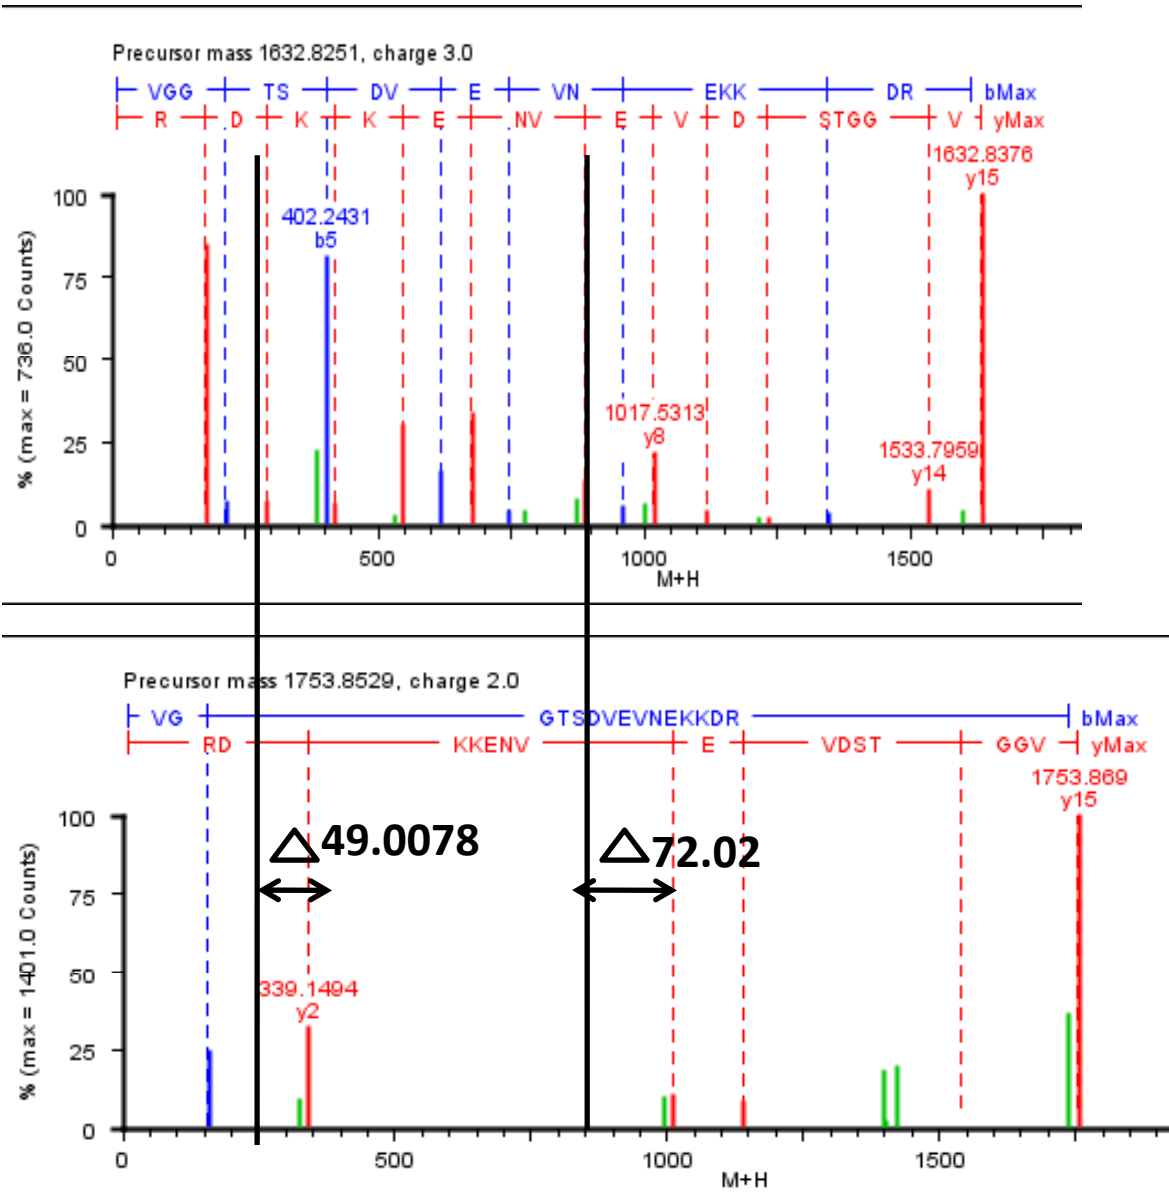

888.4822

1009.5252:  
 (888.48+49.00+72.02)

406-420

(K)VGGTSDVEVNEK(CEL)KDR(MOLD)(V)

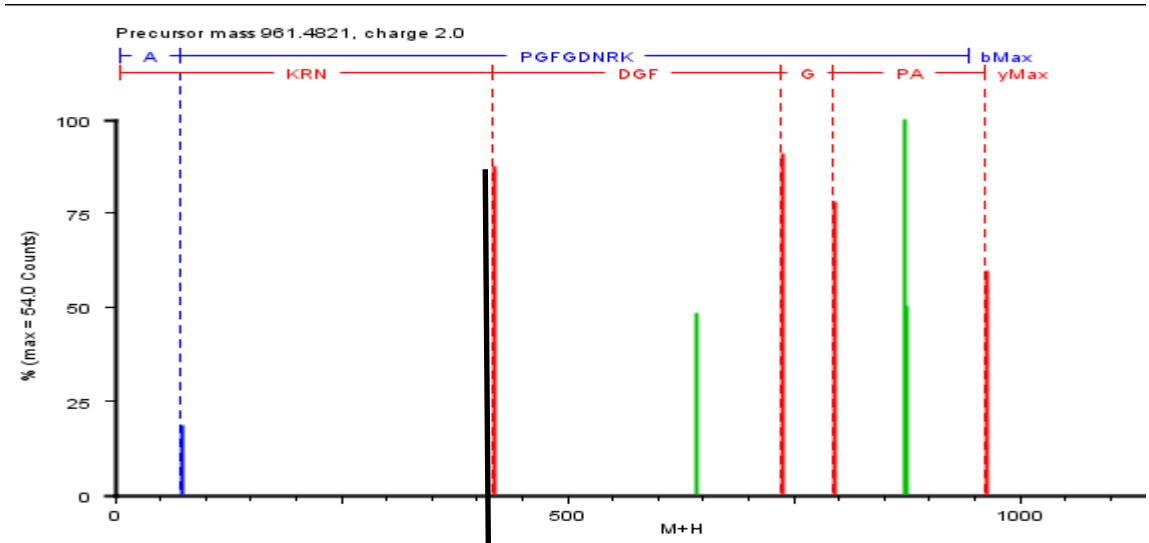

417.2319

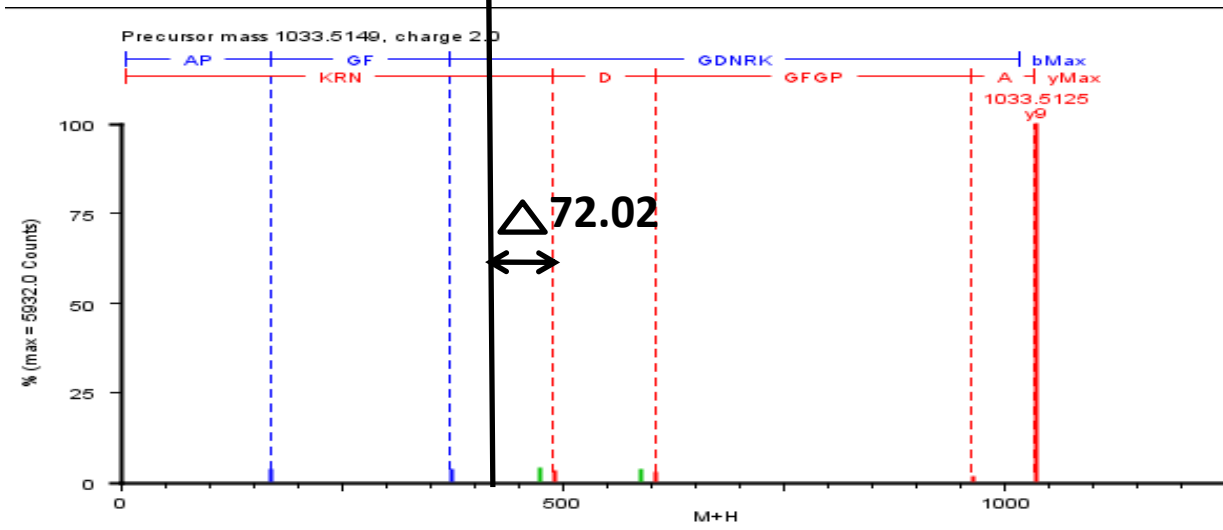

489.2734:  
(417.23+72.02)

302-310

(K)APGFGDNRK(CEL)(N)

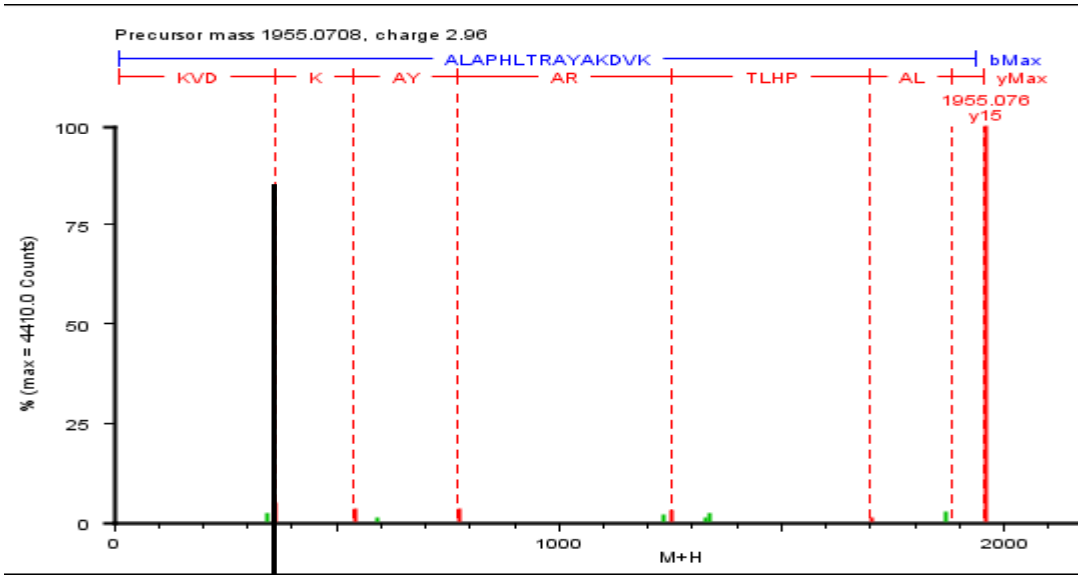

361.2075

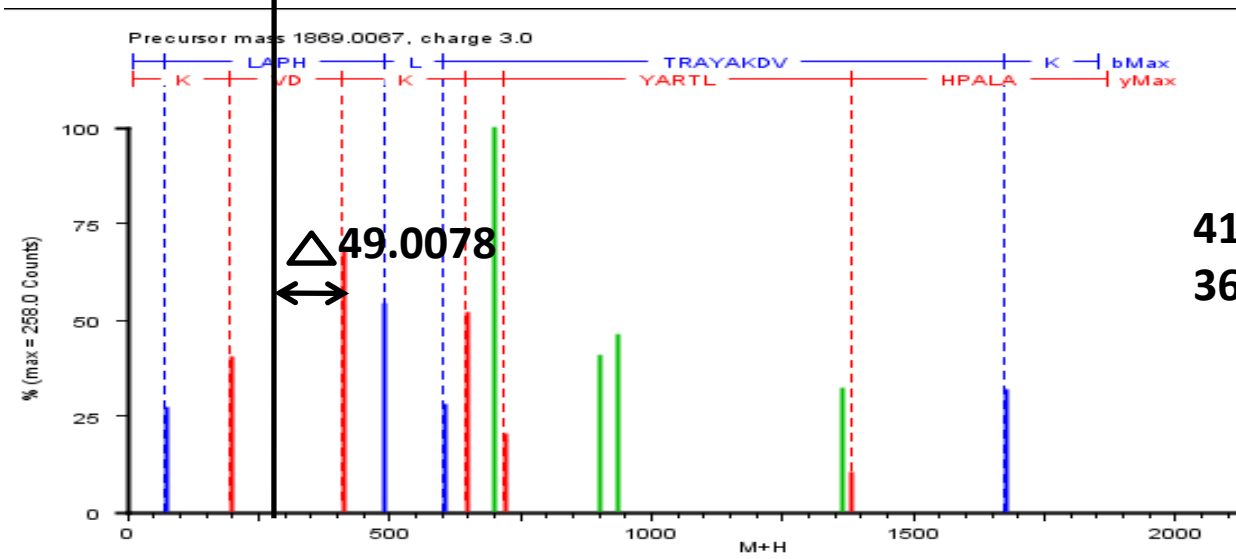

410.2341:  
361.20+ 49.00

17-31

(R)ALAPHLTRAYAKDVK(MOLD)(F)

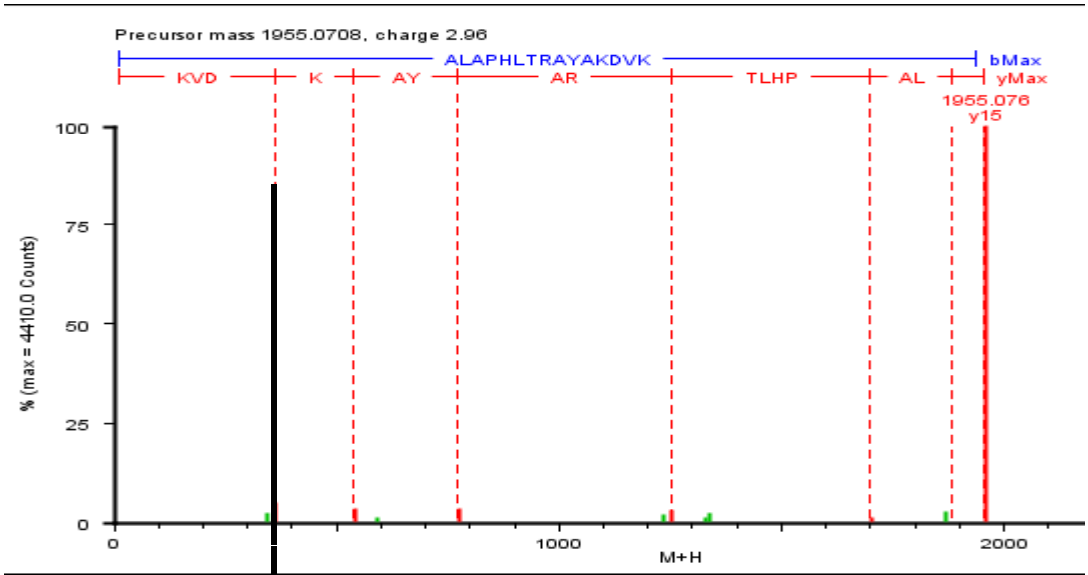

361.2075

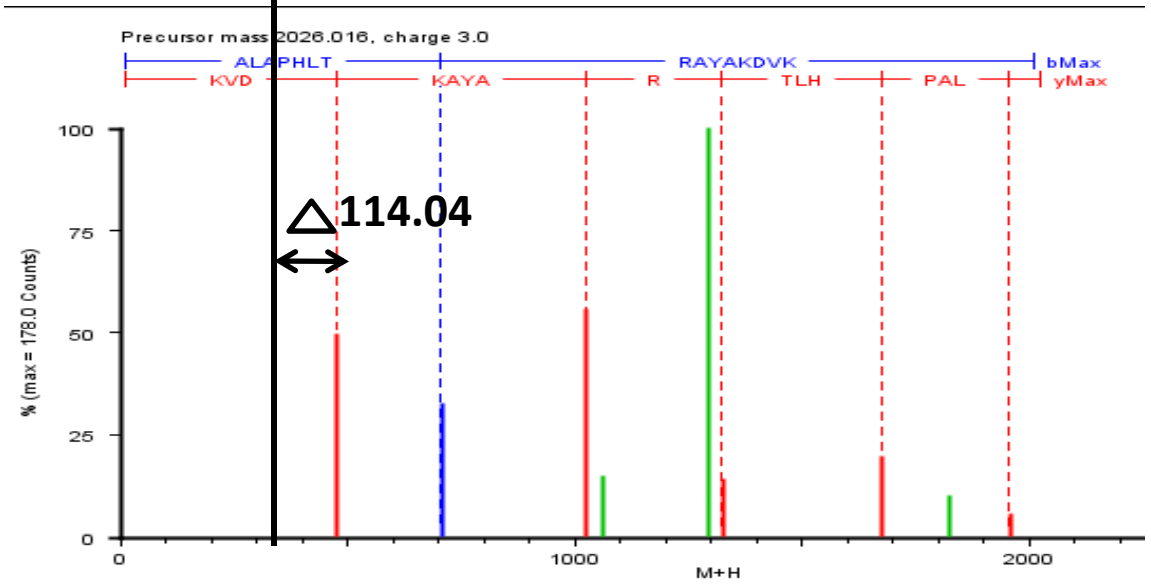

475.2091:  
(361.20+ 114.04)

17-31

(R)ALAPHLTRAYAKDVK(Ubi)(F)

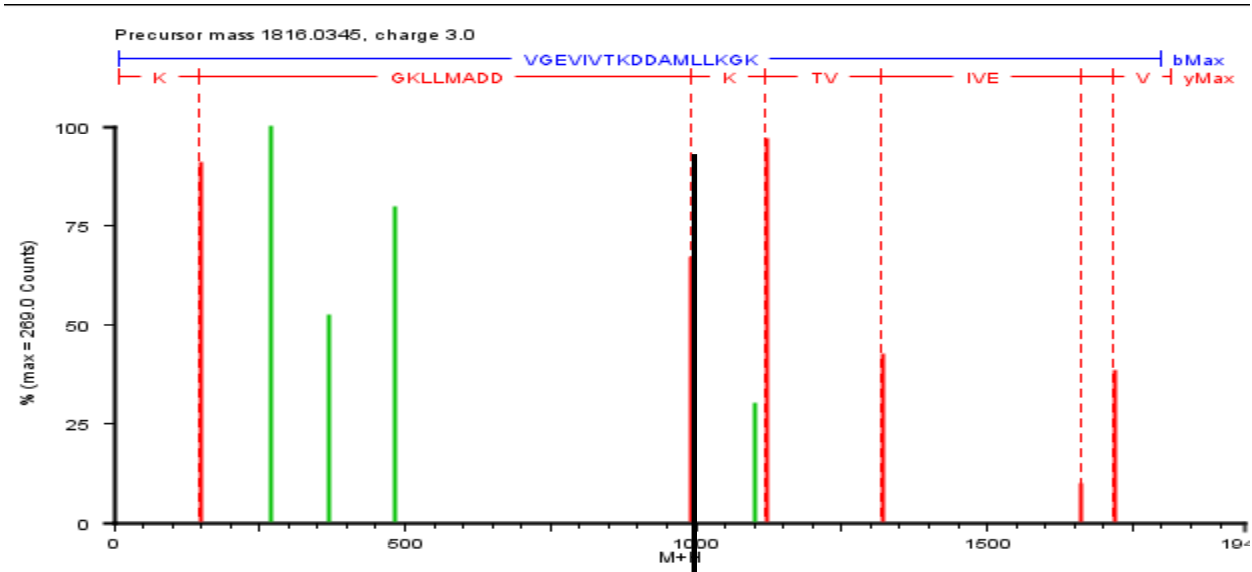

990.5292

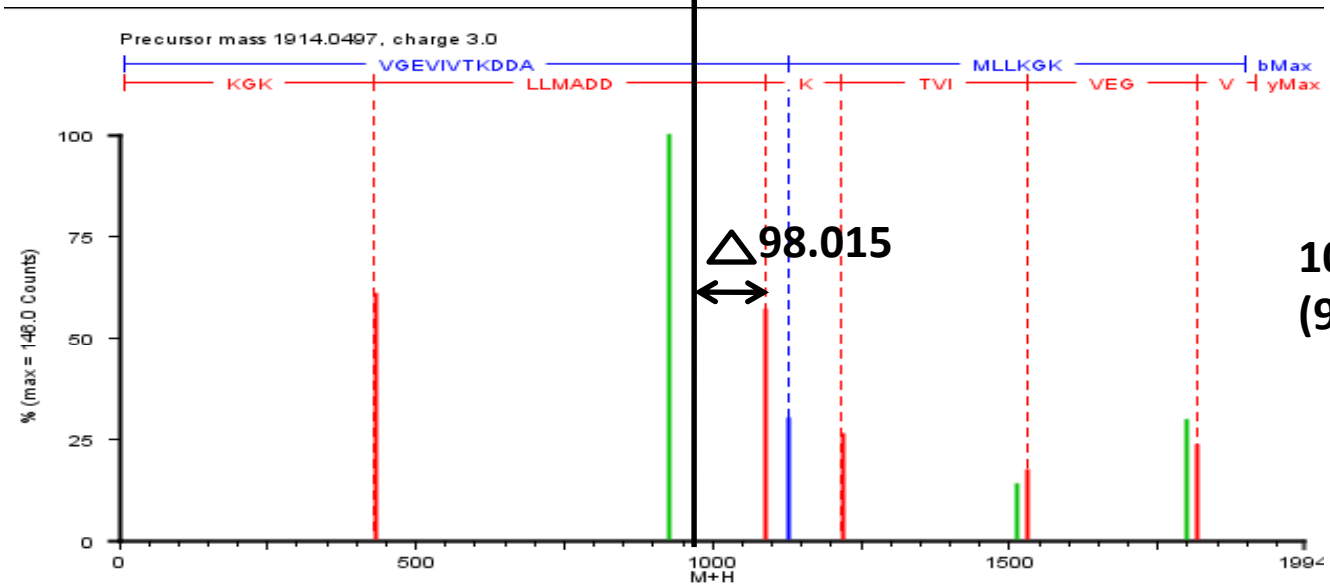

1088.5643:  
(990.52+49.00+49.0)

345-361

(K)VGEVIVTKDDAMLLK(MOLD)GK(MOLD)(G)

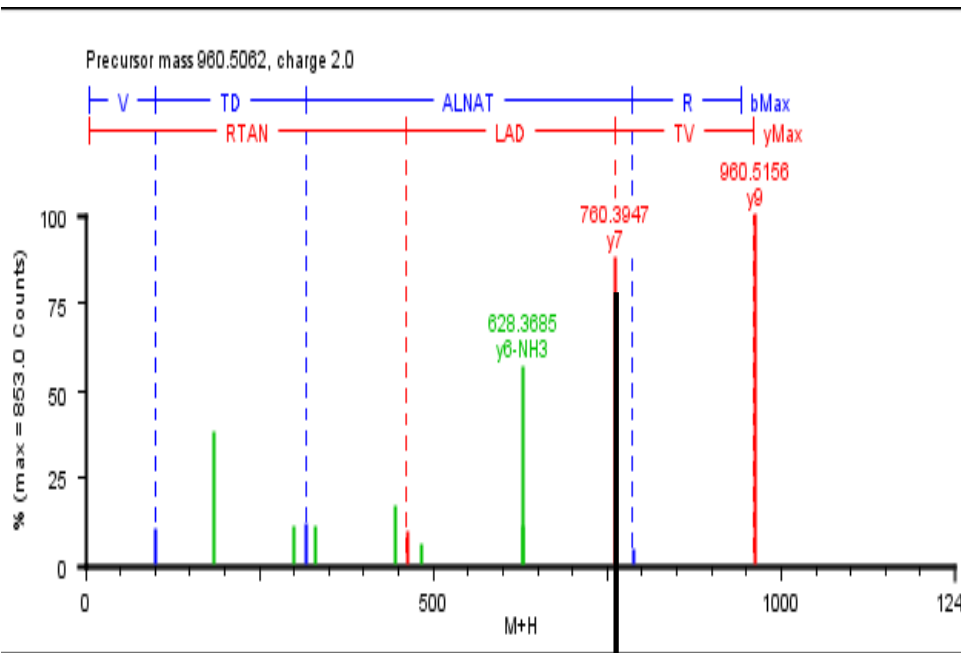

**760.3947**

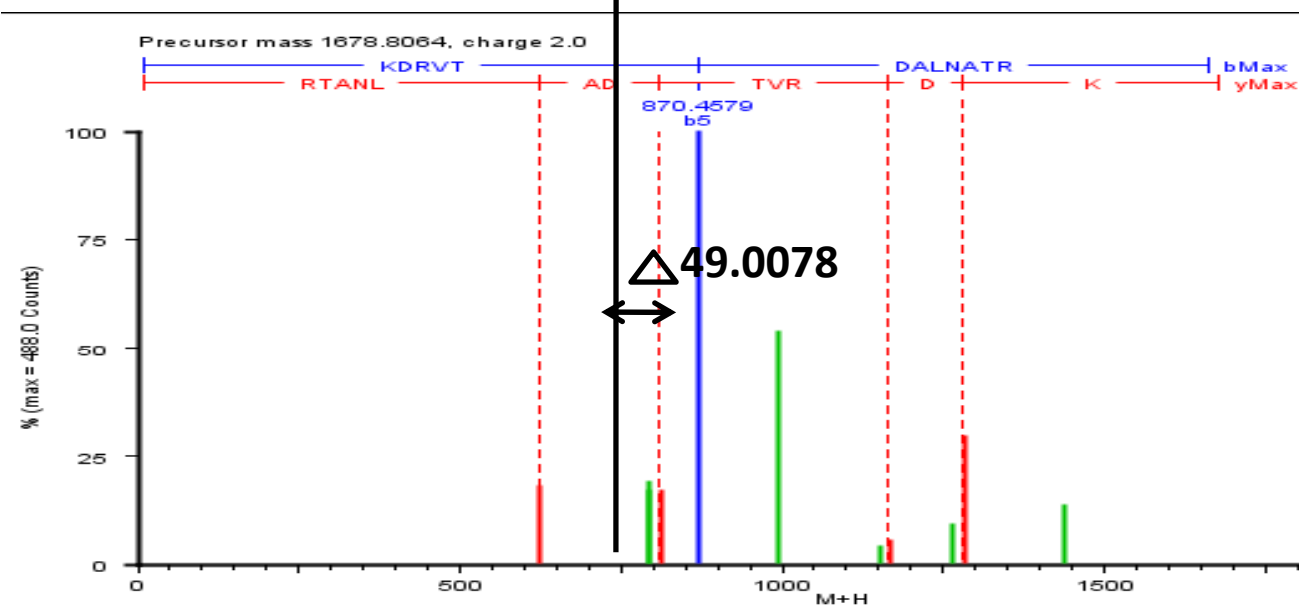

**809.3331:**  
**(760.39+ 49.00)**

- 418-429

**(K)KDRVTDALNATR(MOLD)(A)**



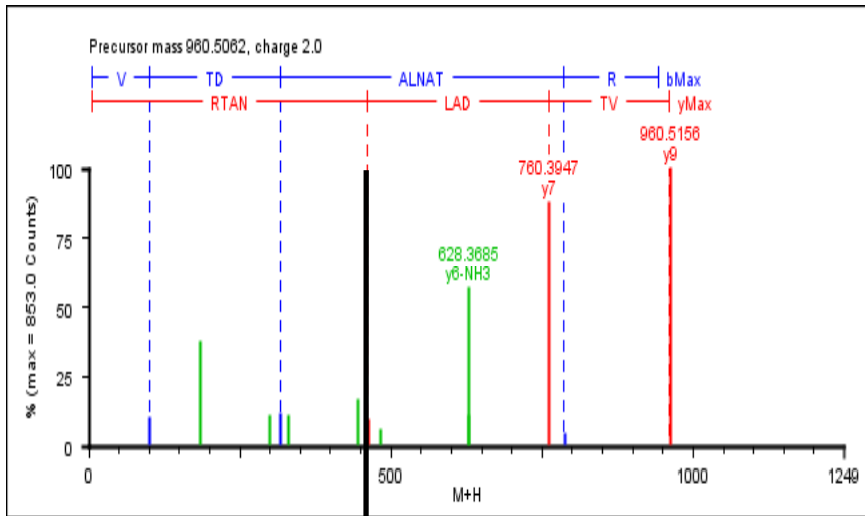

461.2296

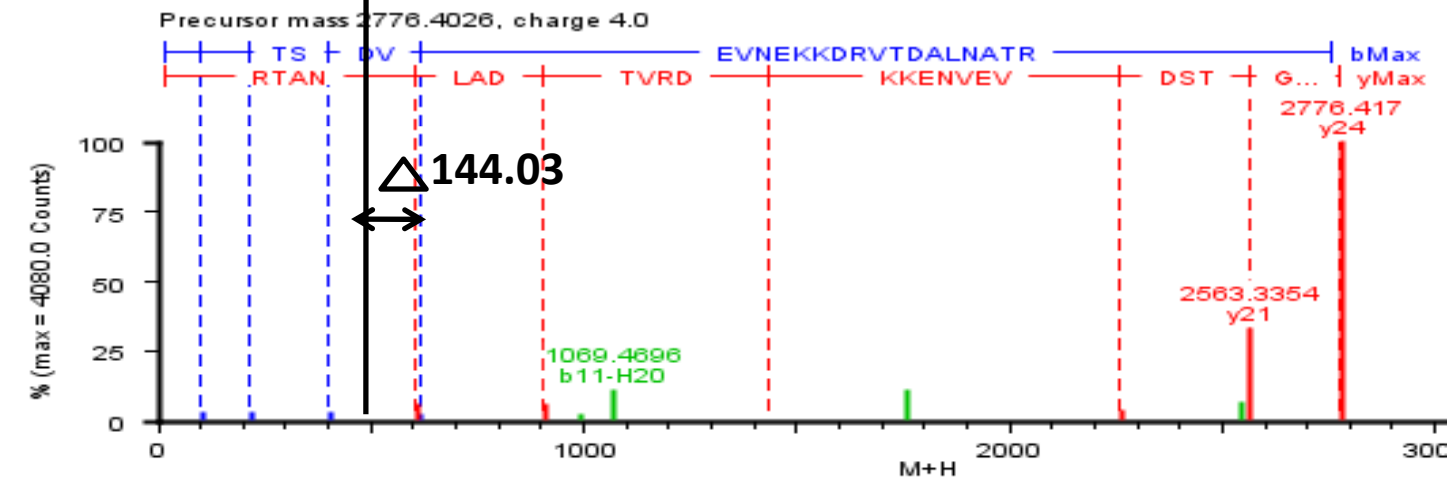

605.2991;  
(461.22+144.03)

406-429

(K)VGGTSDVEVNEKKDRVTDALNATR(ImiA)(A)

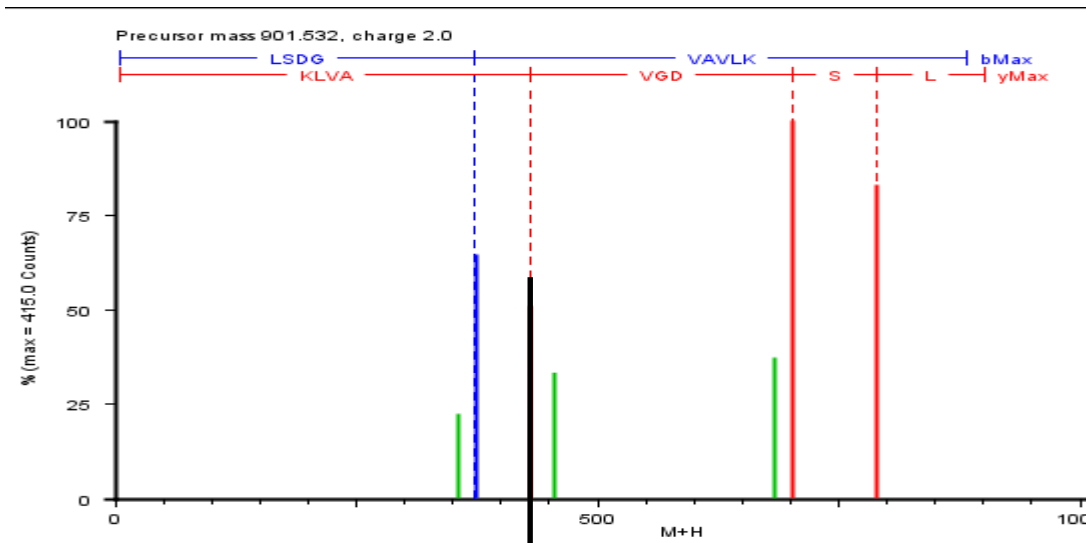

430.3033

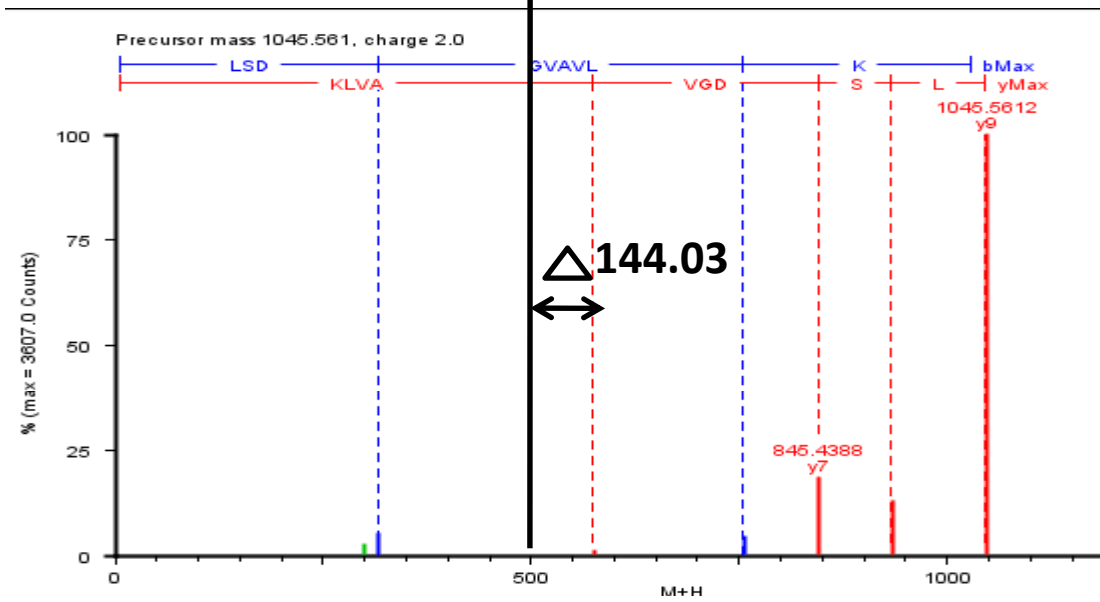

574.275:  
(430.30+ 144.03)

397-405

(K)LSDGVAVLK(ImiA)(V)

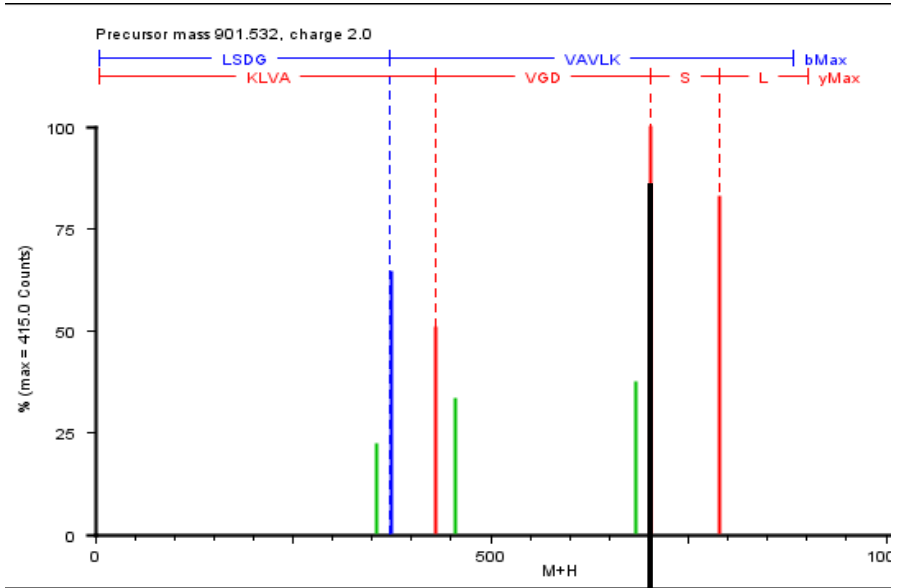

**701.3756**

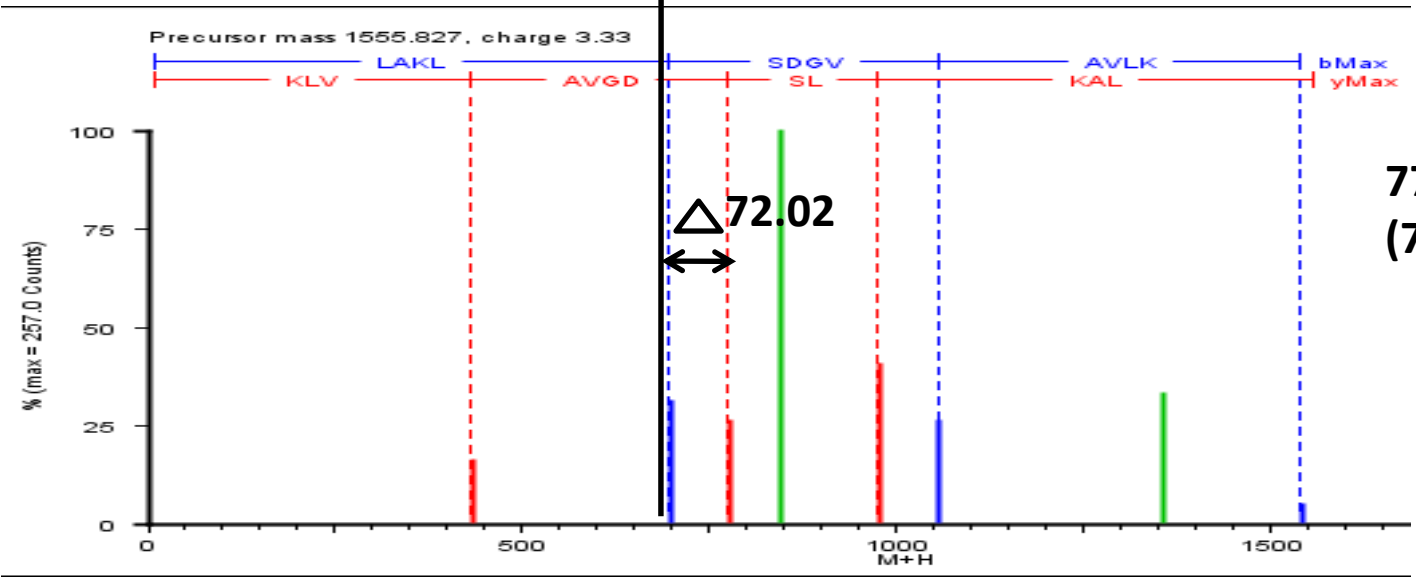

**773.3756:**  
**(701.37+72.02)**

**394-405**

**(R)LAKLSDGVAVLK(CEL)(V)**

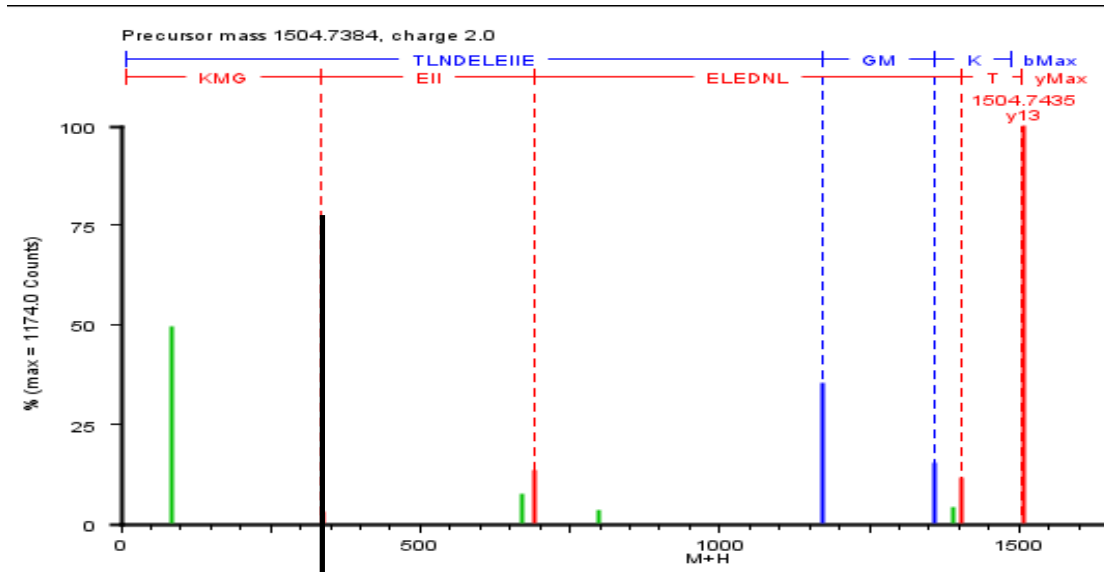

335.1418

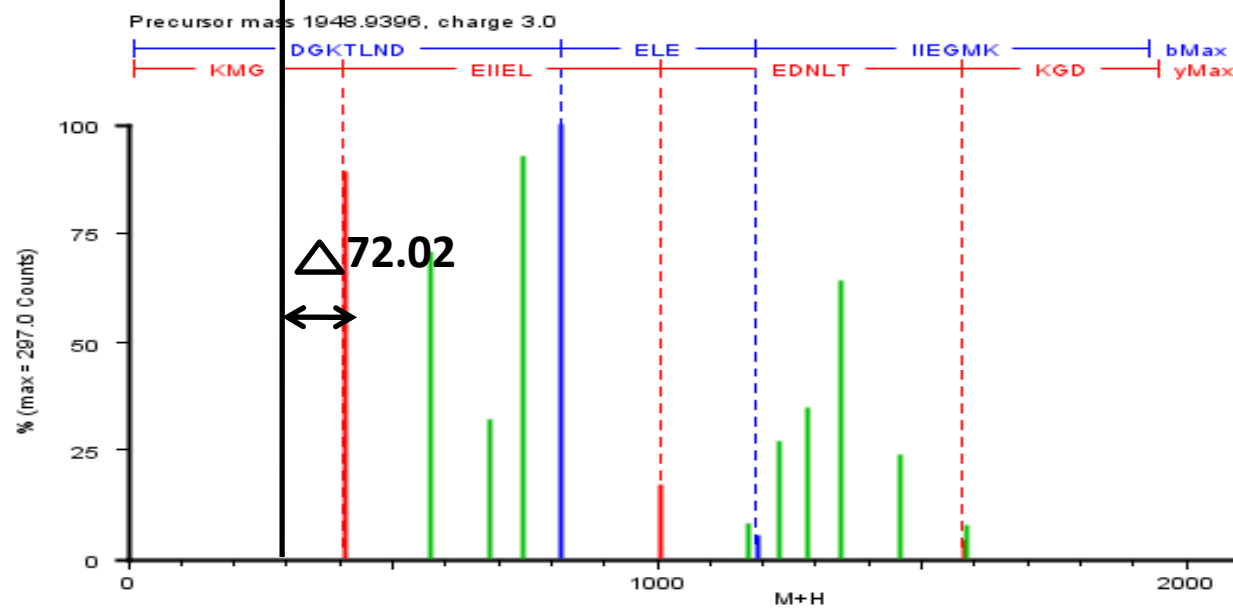

407.189:  
(335.14+ 72.02)

203-218

(K)DGKTLNDELEIIEGMK(CEL)(F)

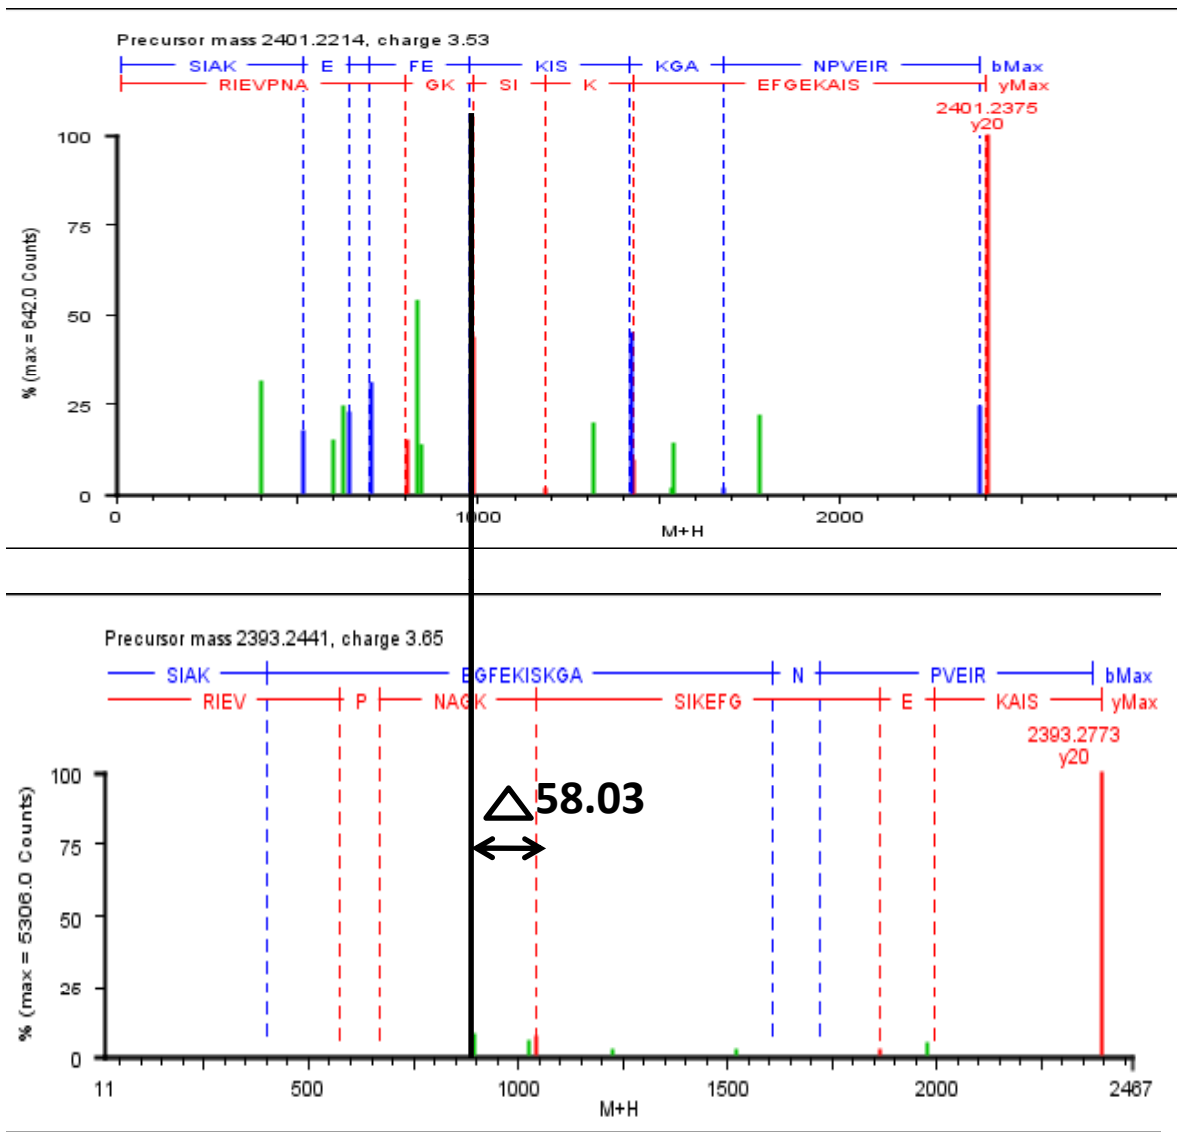

983.4801

1041.4801

122-141

(R)SIAKEGFEKISKGANPVEIR(Pento)(R)

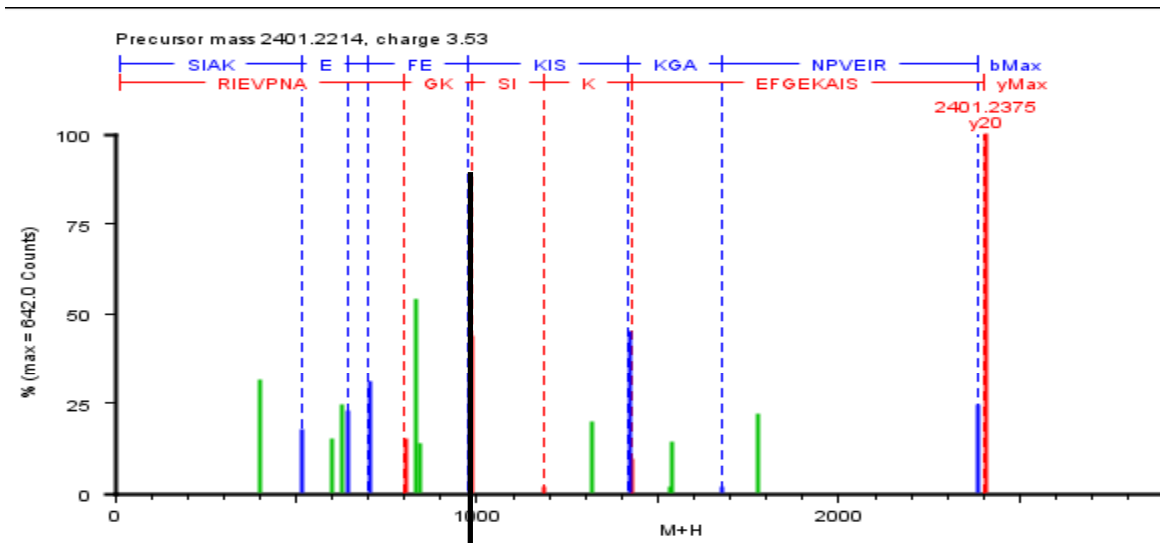

983.4801

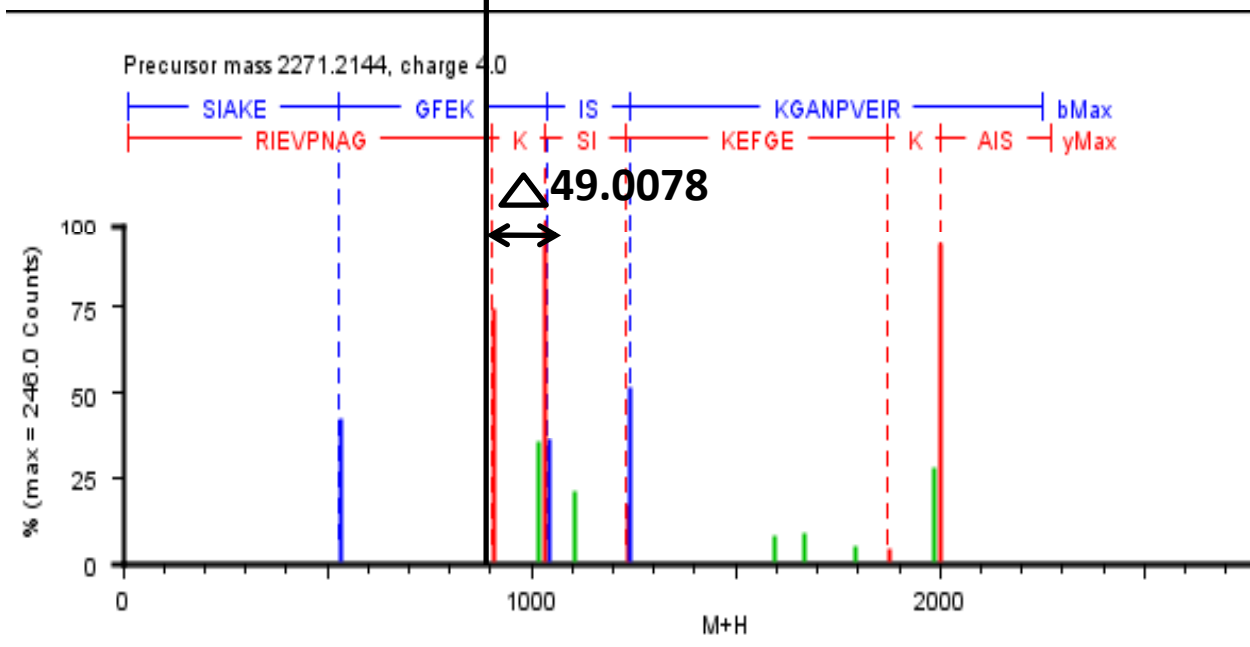

1032.5952

122-141

(R)SIAKEGFEEKISKGANPVEIR(MOLD)(R)

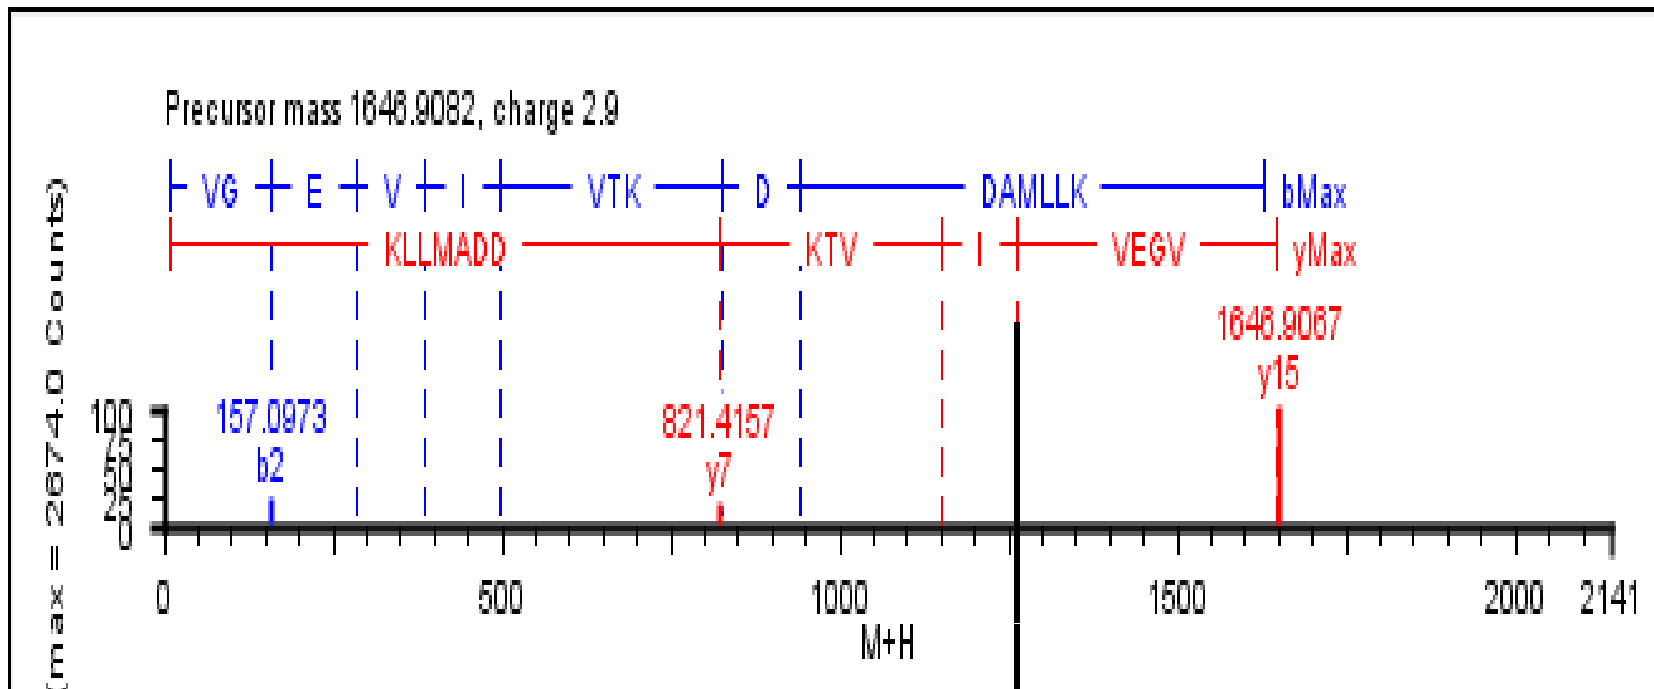

1646.9067

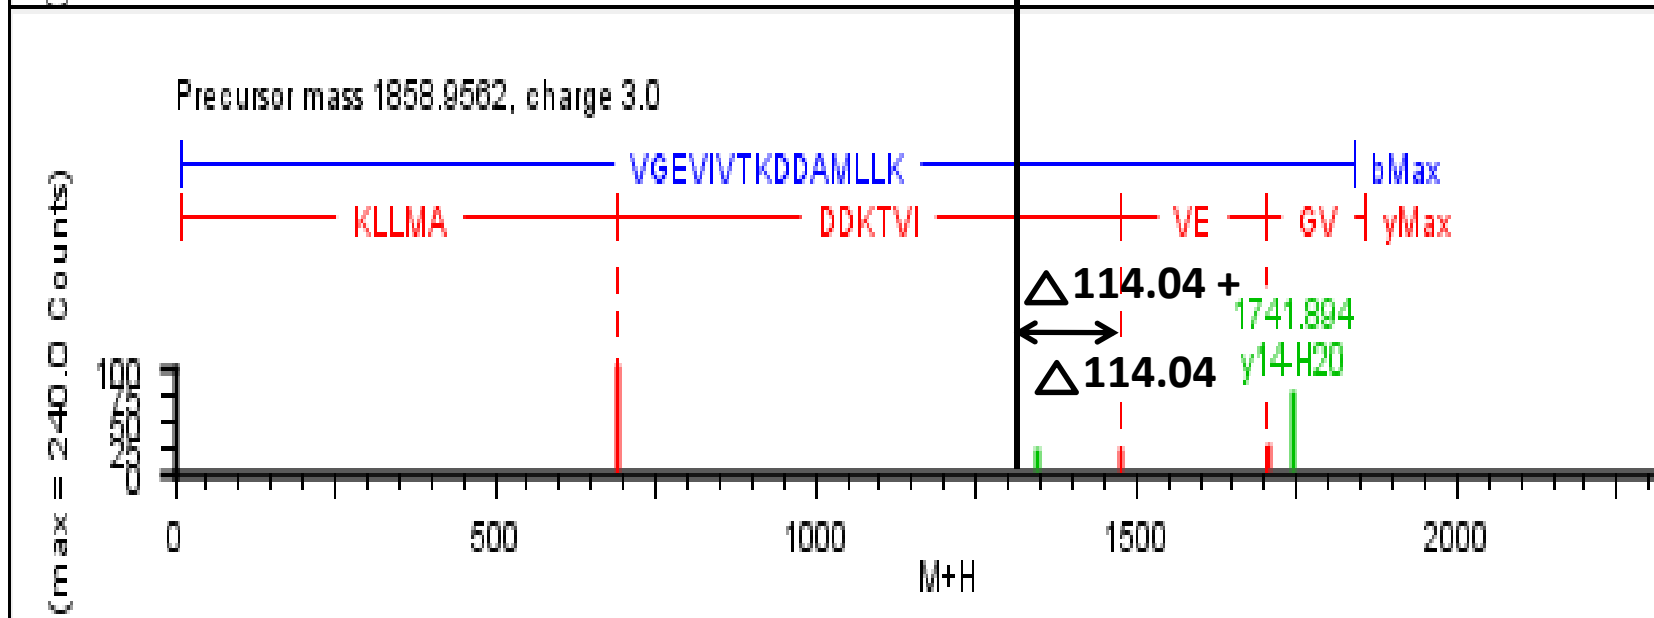

1858.9562:  
(1646.90+  
114.04)

345-359

(K)VGEVIVTK(Ubi)DDAMLLK(Ubi)(G)

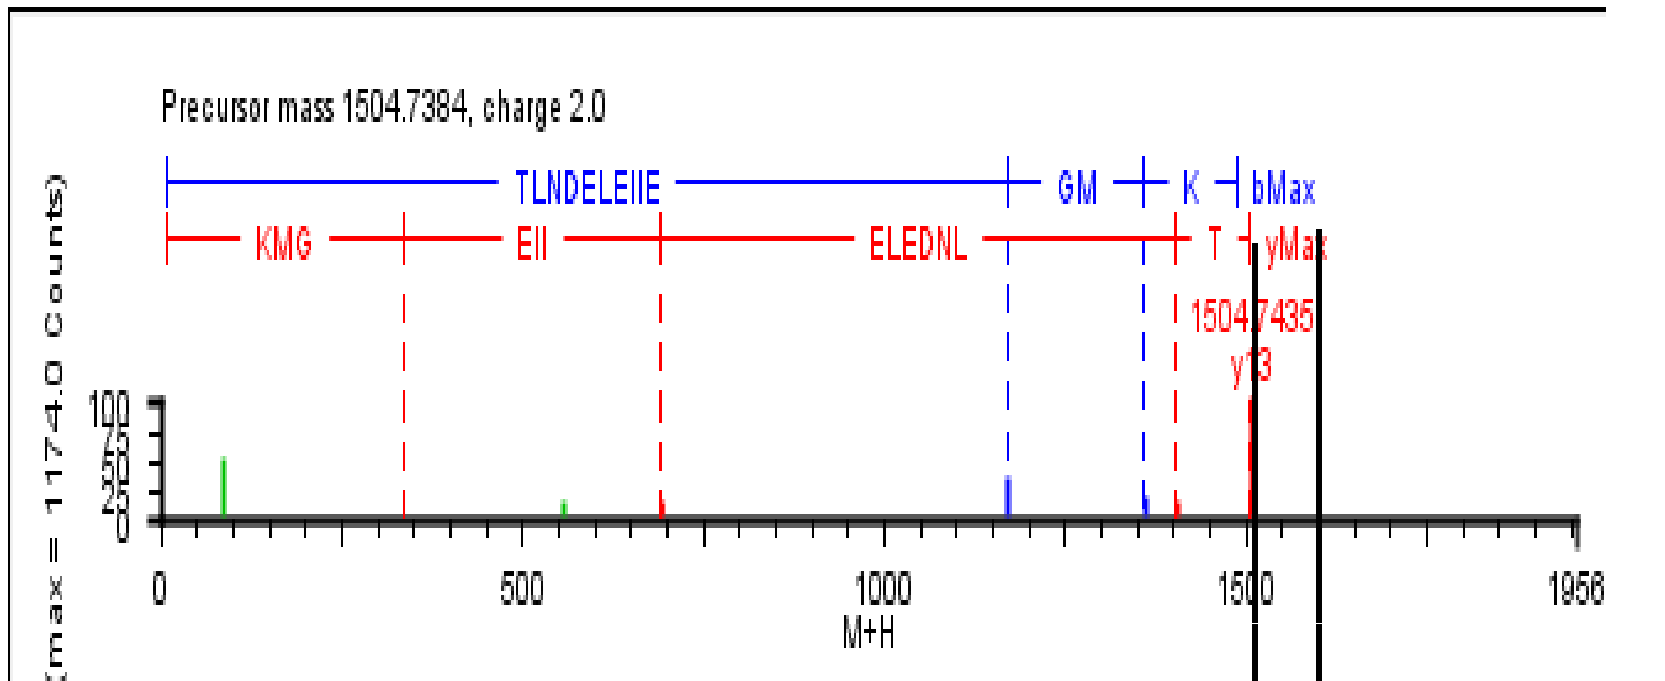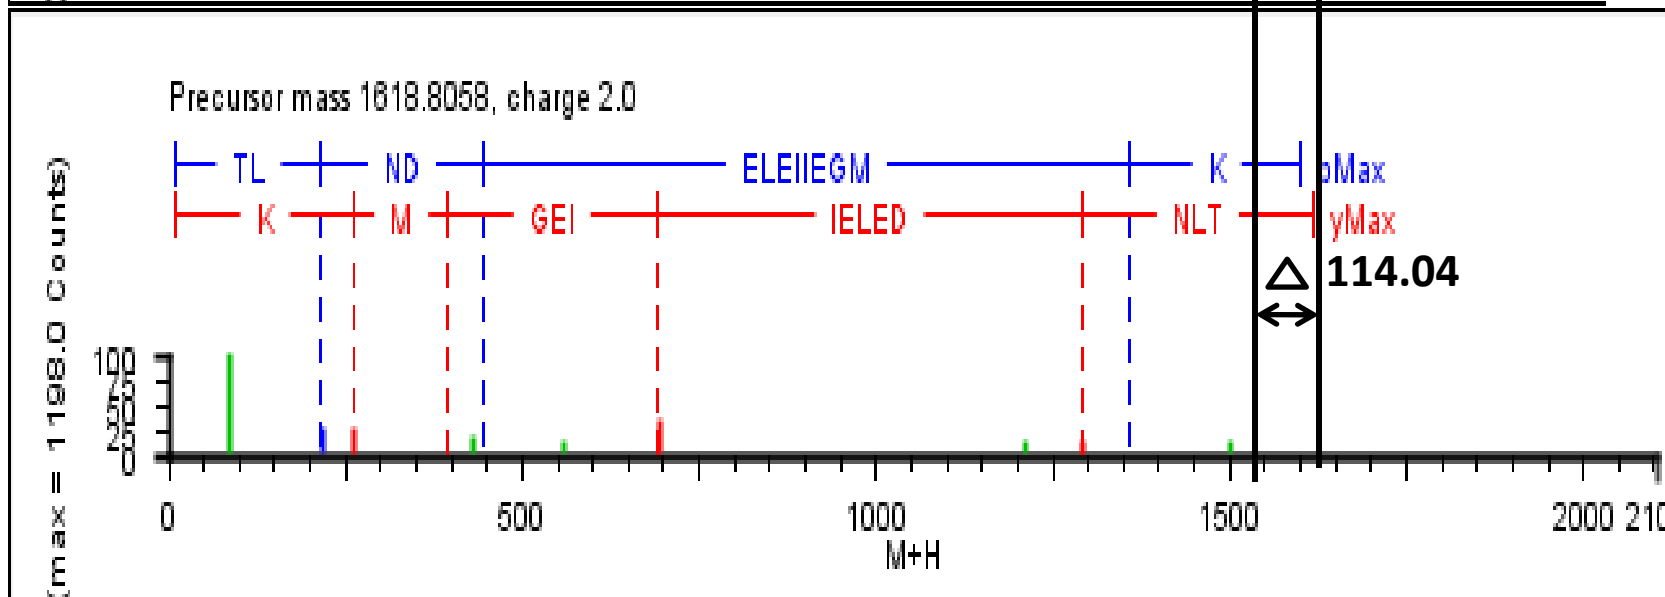

206-218

(K)TLNDELEIIEGMK(Ubi)(F)



ICDH

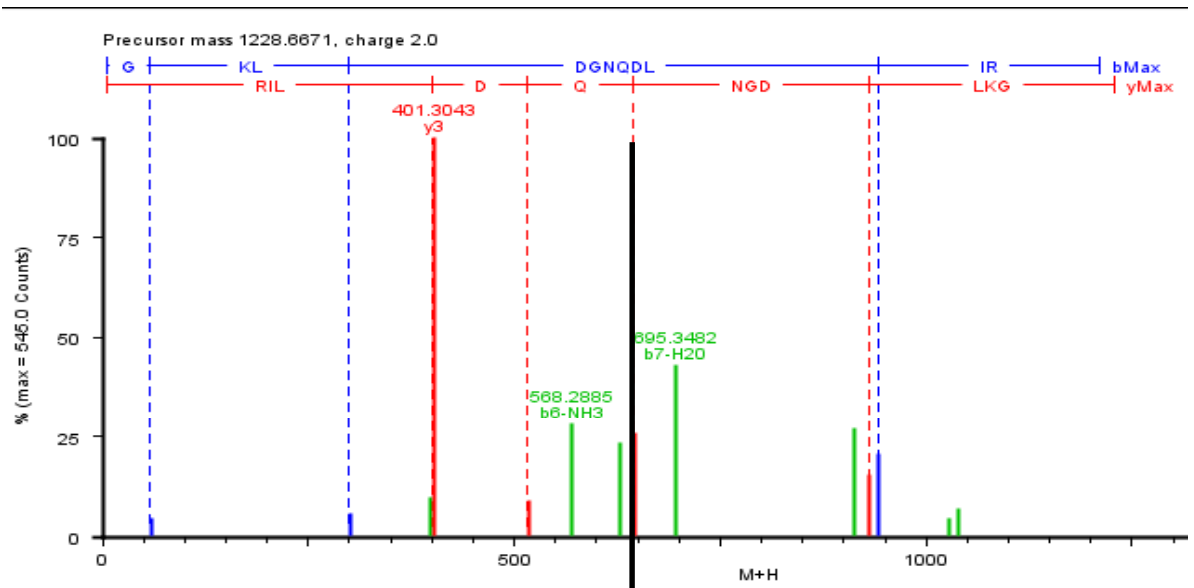

644.3426

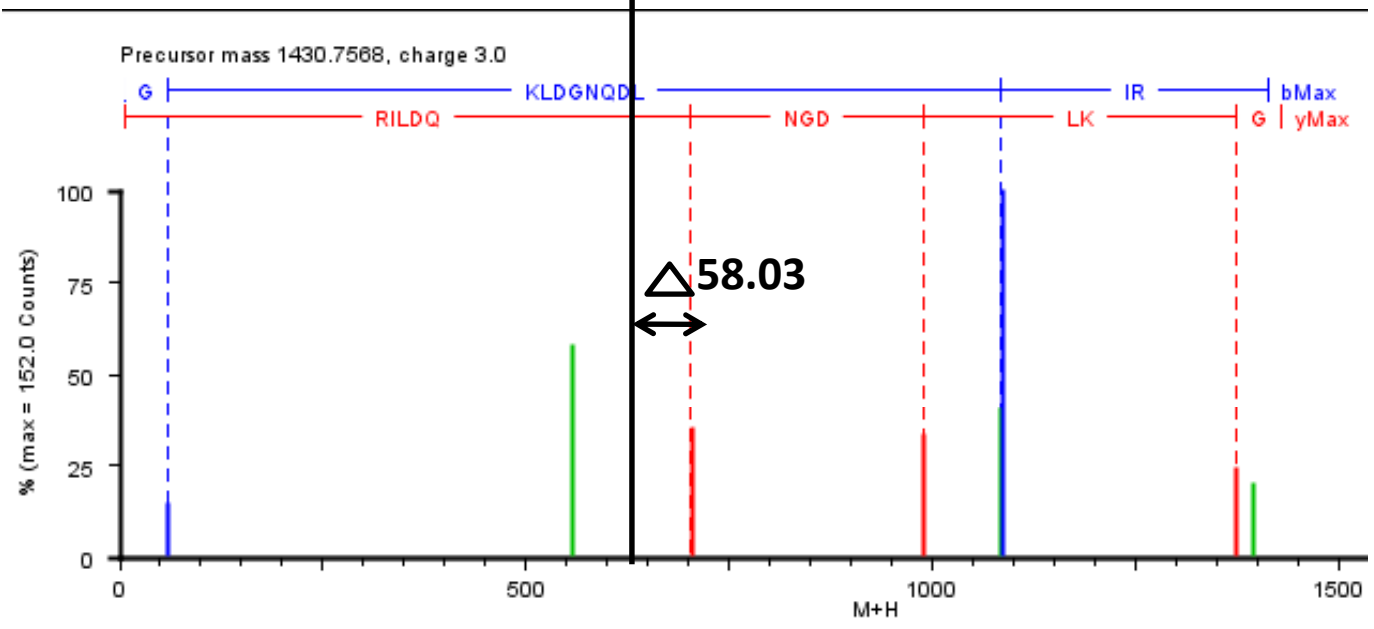

702.3791

383-393

(R)GKLDGNQDLIR(Pento)(F)

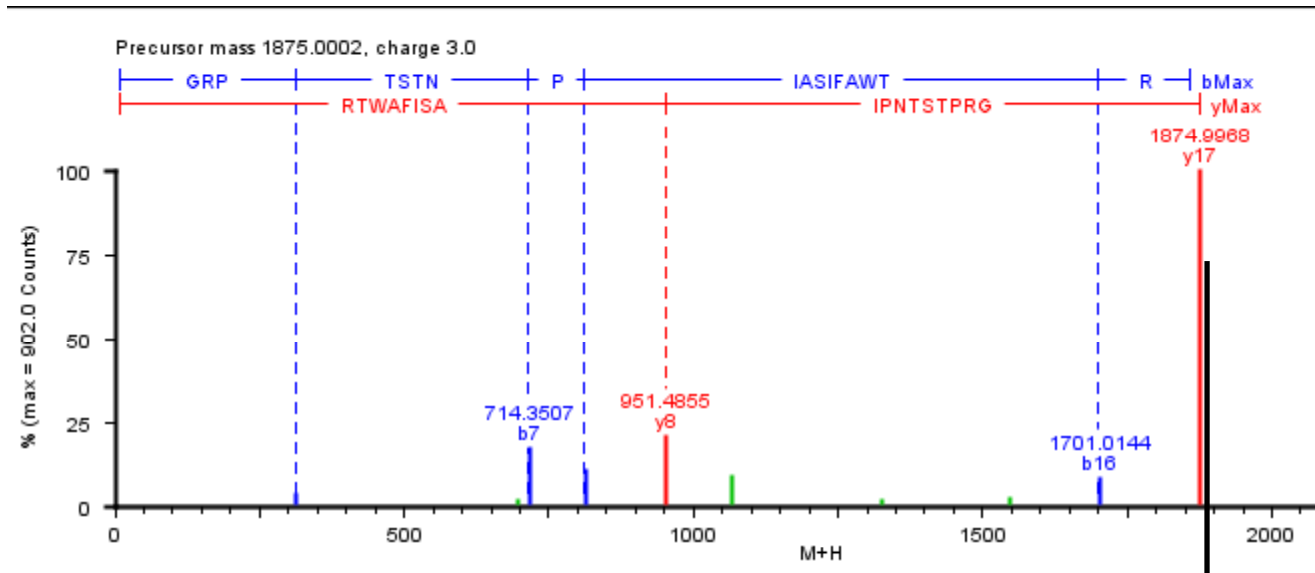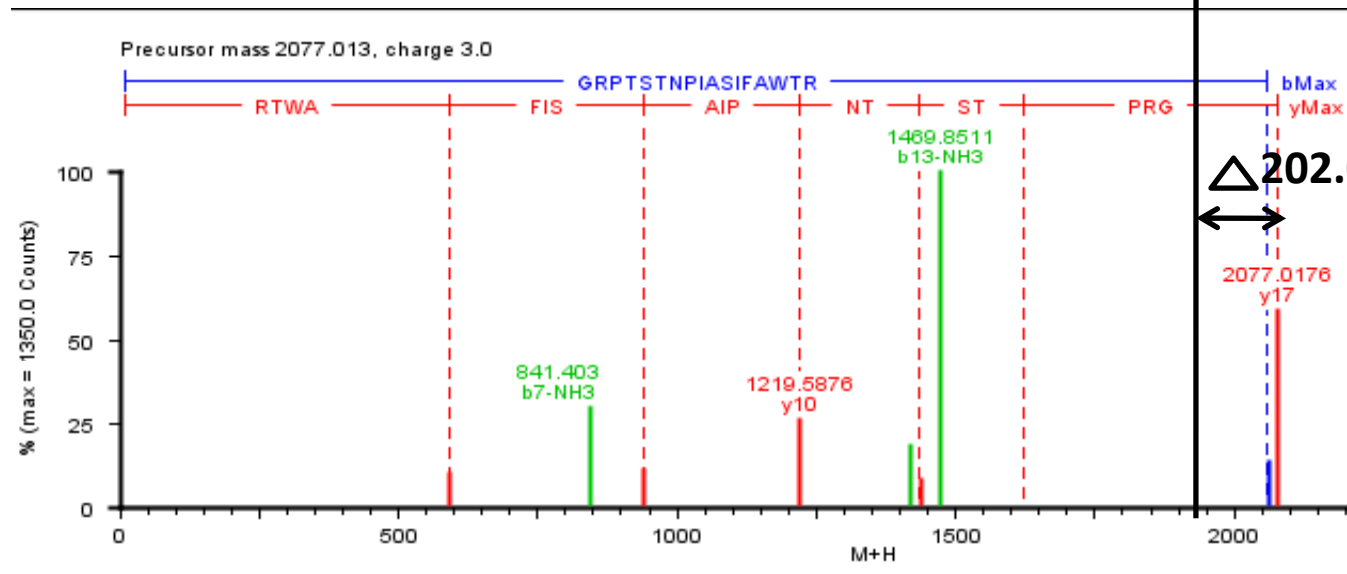

361-377

(K)GR(ImiA)PTSTNPIASIFAWTR(Pento)(G)

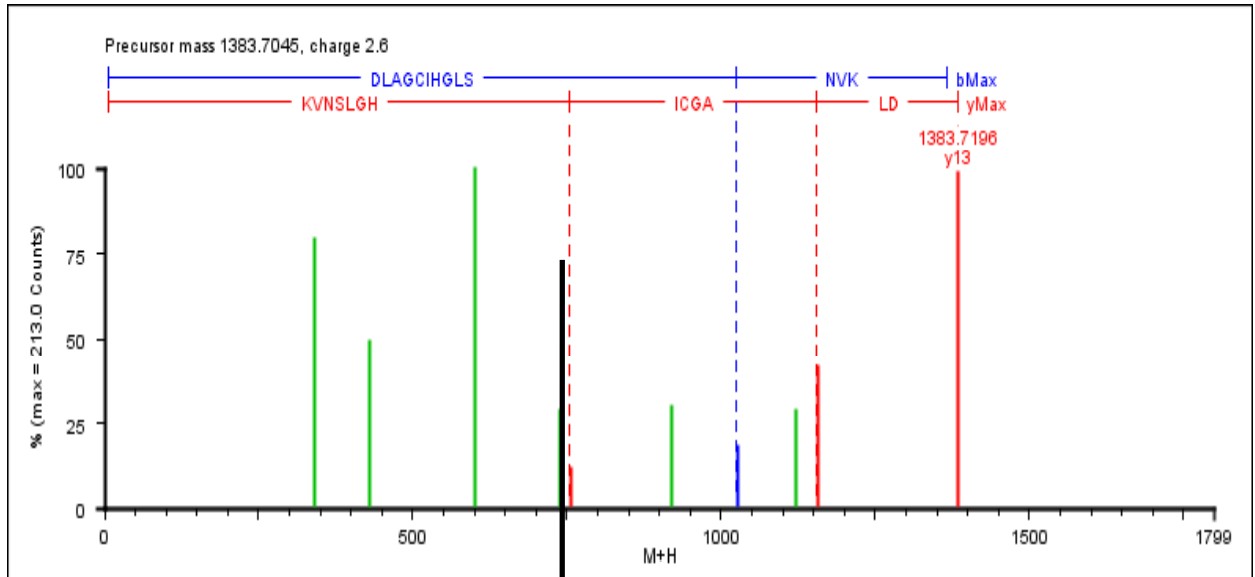

754.4303

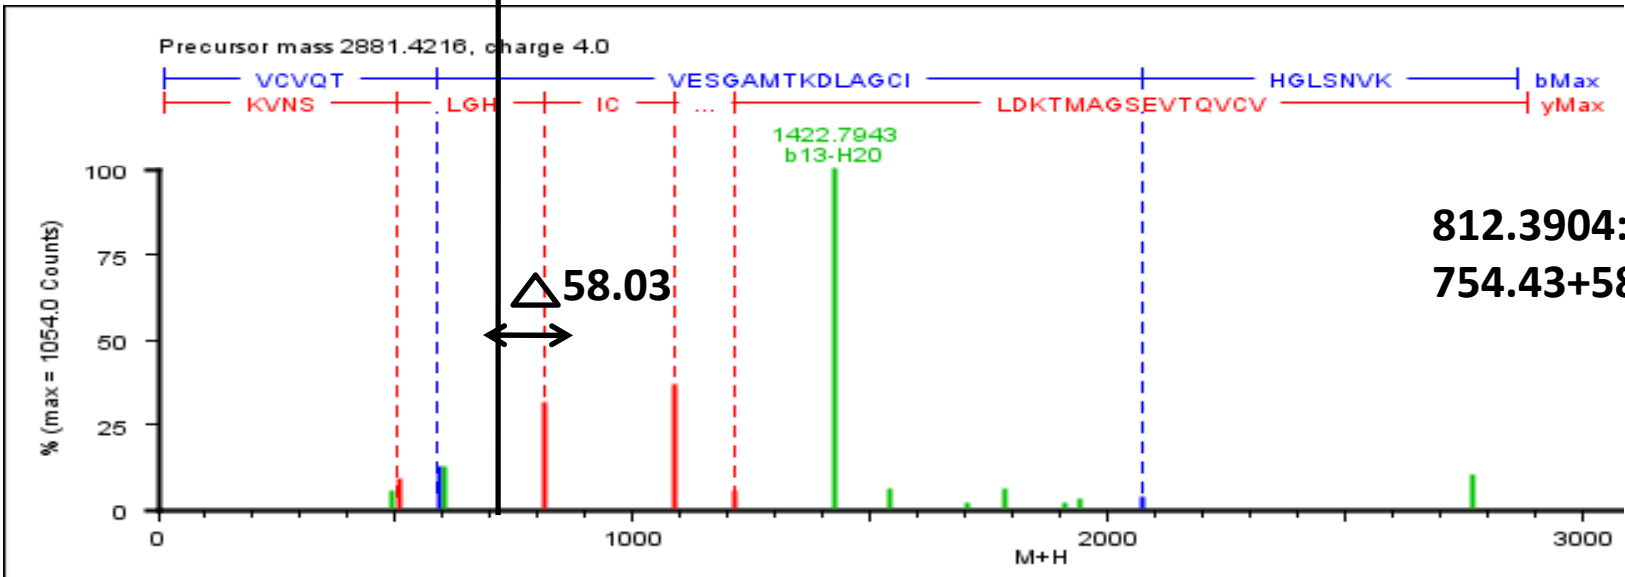

812.3904:  
754.43+58.03

401-426

(K)VCVQTVESGAMTKDLAGCIHGLSNV**K(Pento)**(L)

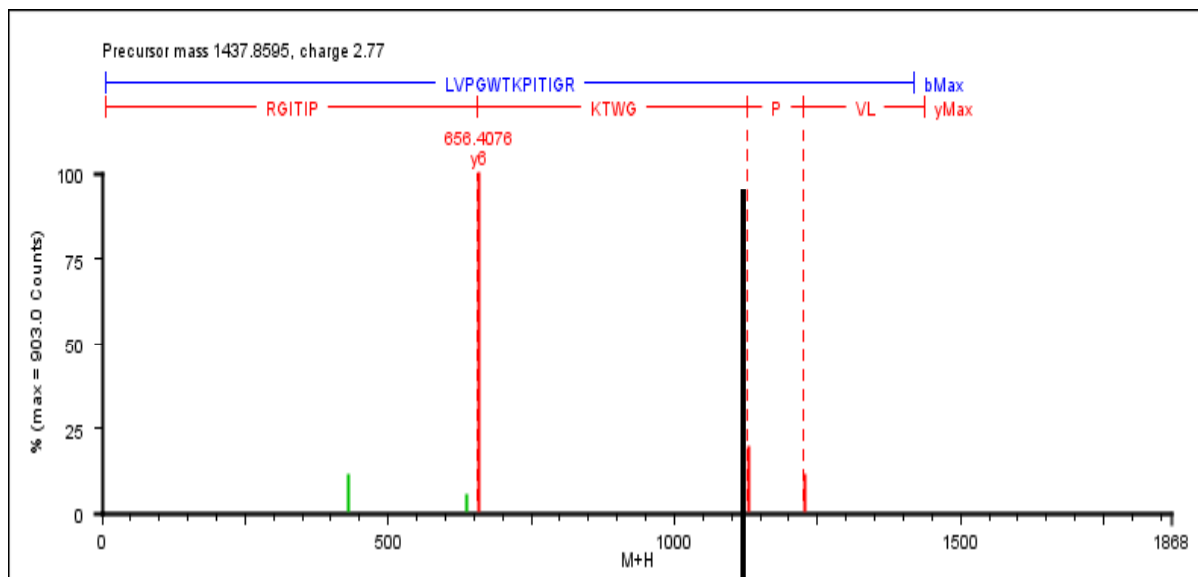

1128.6216

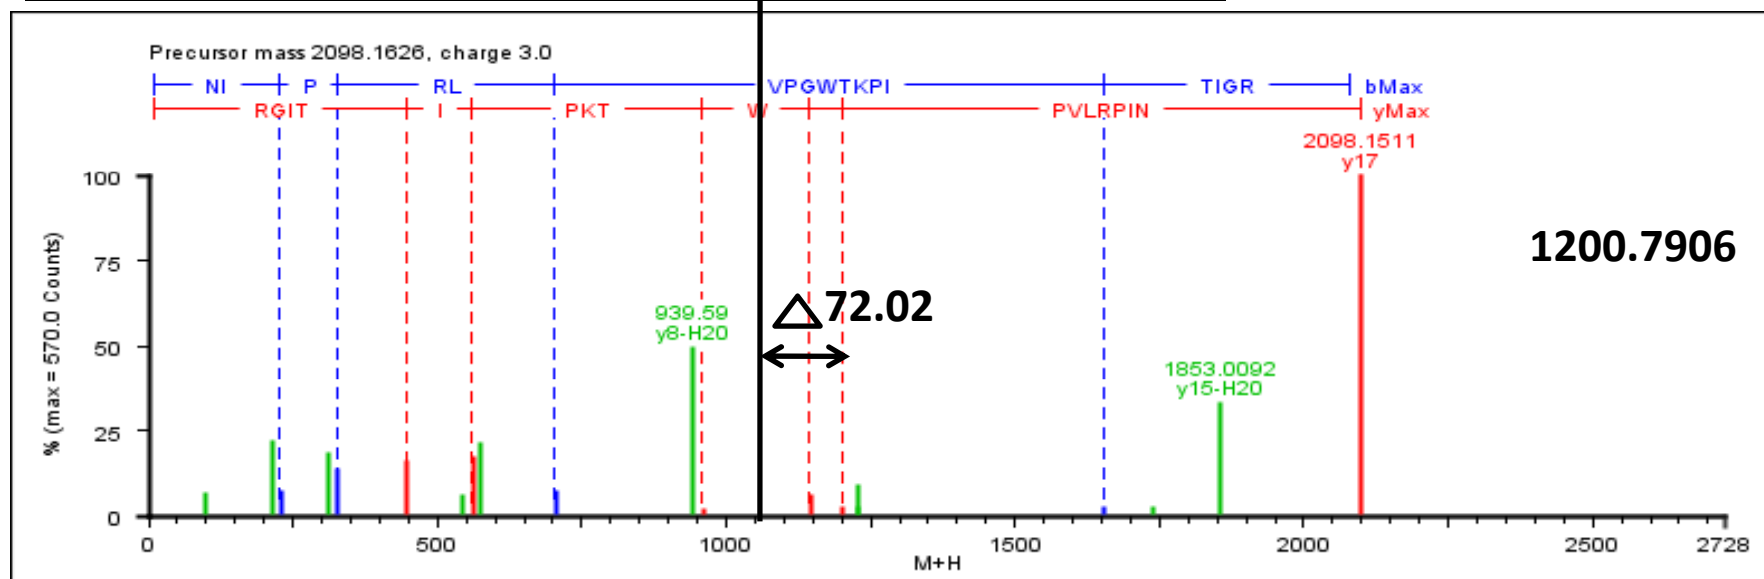

1200.7906

156-172

(K)NIPRLVPGWTKPITIGR(CEL)(H)

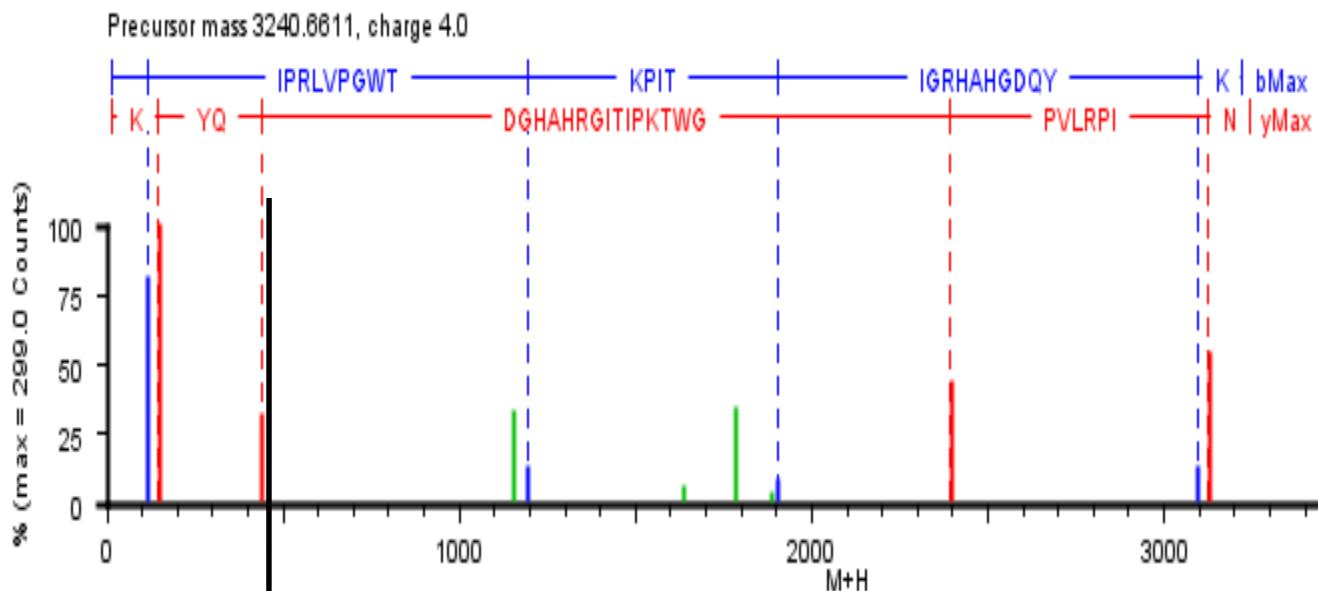

438.2404

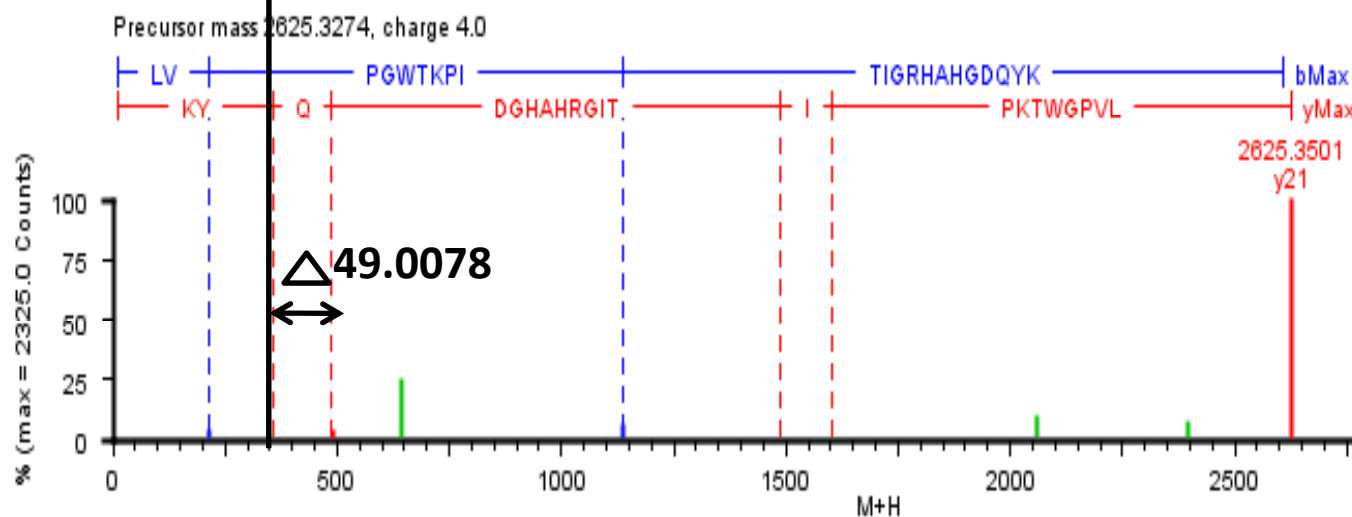

487.2357

160-180

(R)LVPGWTKPITIGRHAHGDQYK(MOLD)(A)

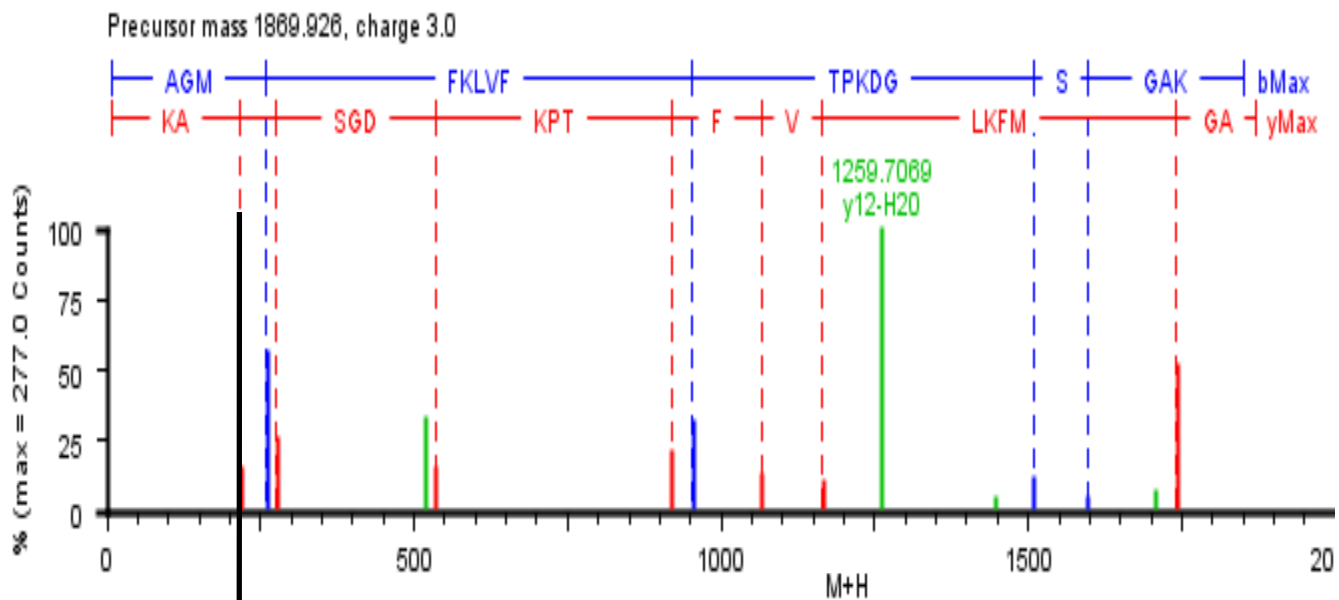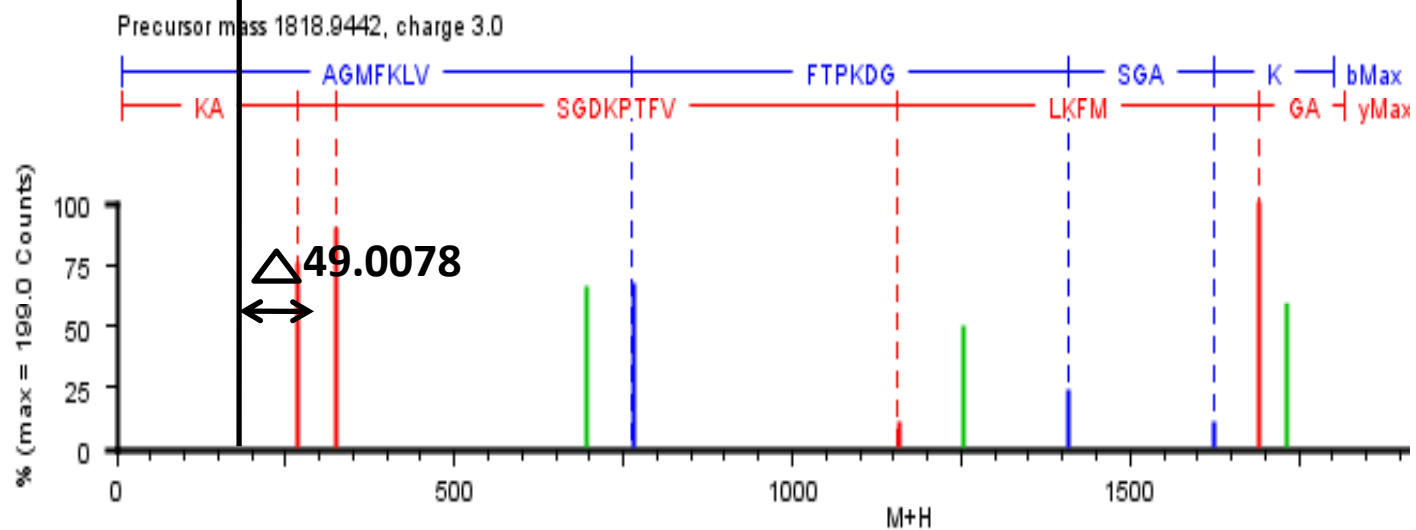

189-205

(R)AGMFKLVFTPKDGSGAK(MOLD)(E)

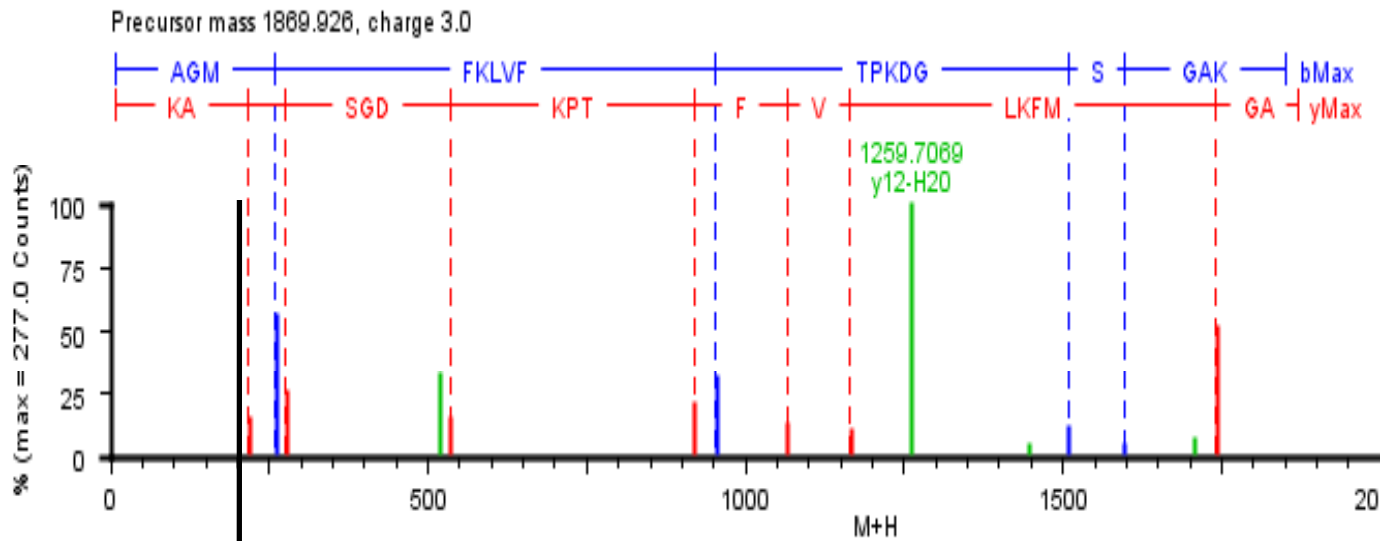

218.1401

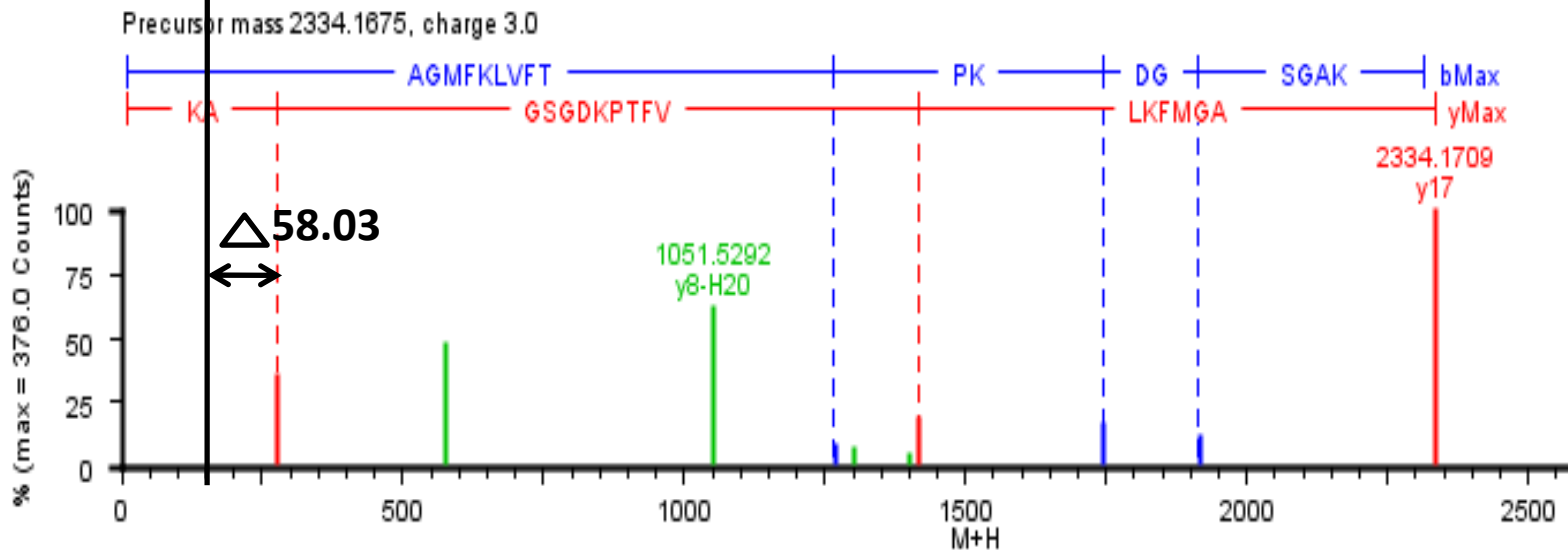

276.1783



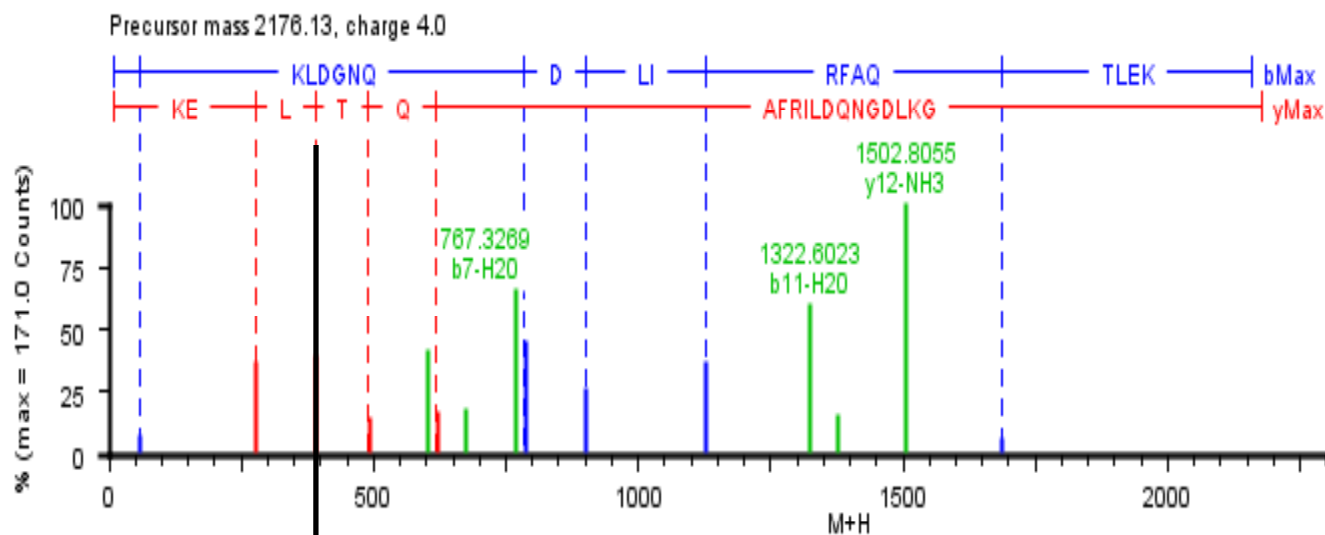

389.2382

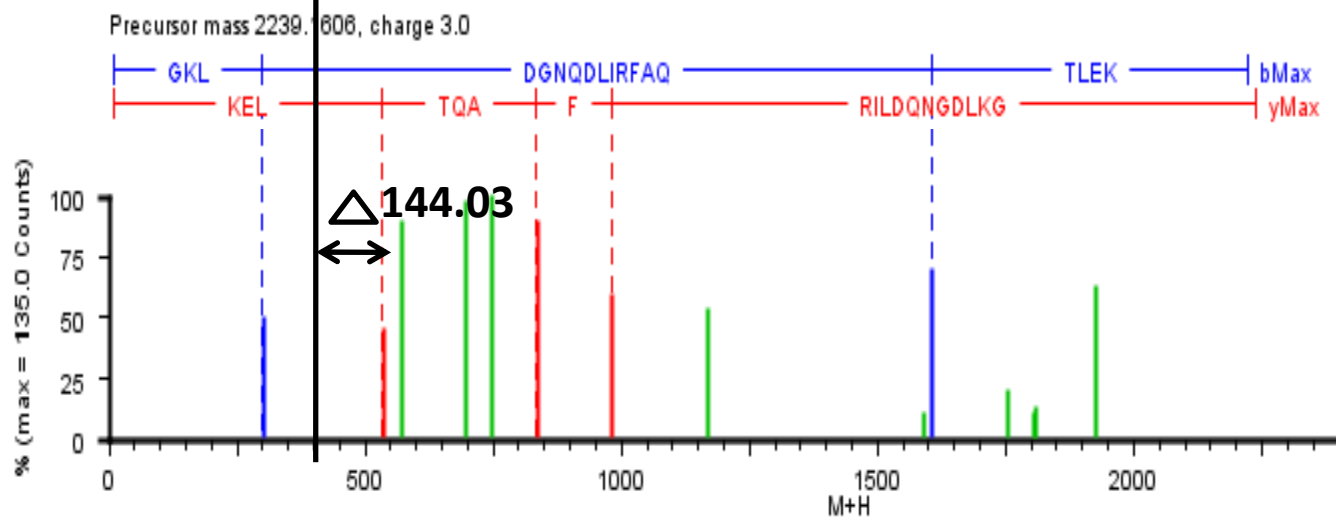

533.2373

383-400

(R)GKLDGNQDLIRFAQ**TLEK**(ImiA)(V)



389.2382

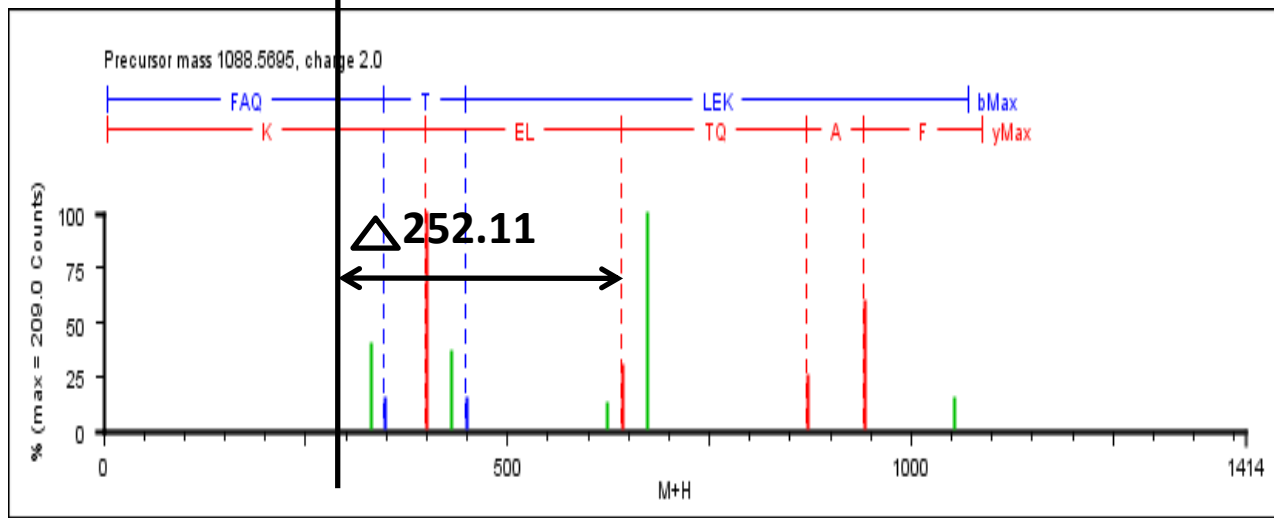

641.3063

394-400

(R)FAQTLEK(Crossline)(V)

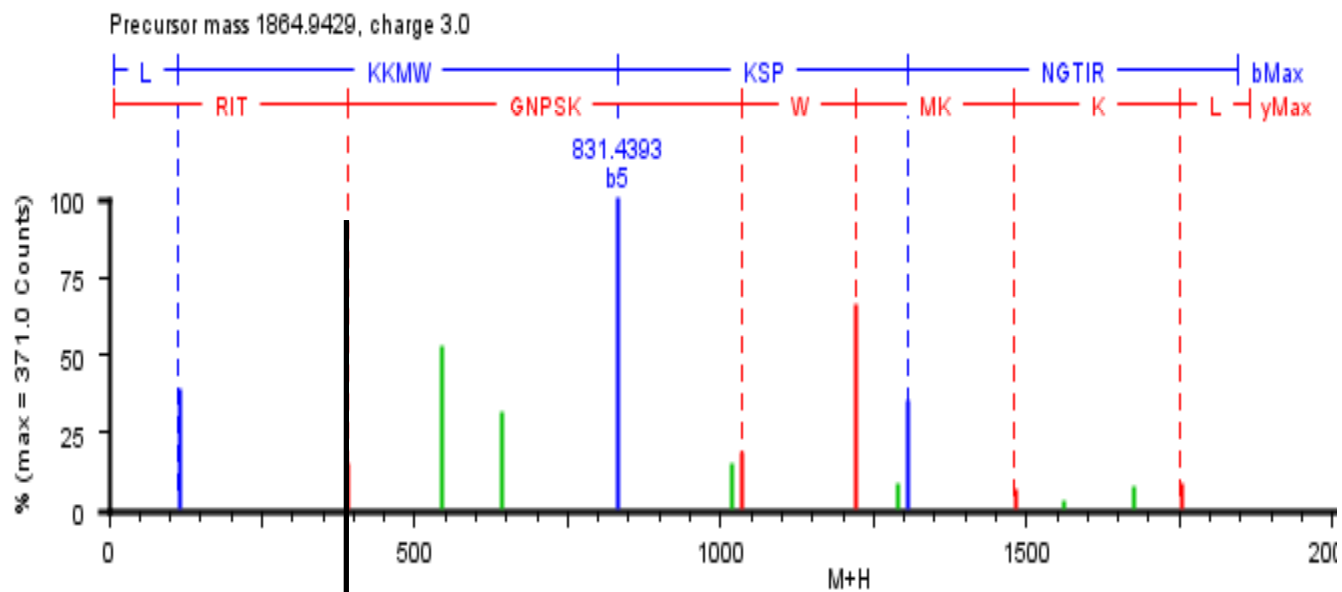

389.2232

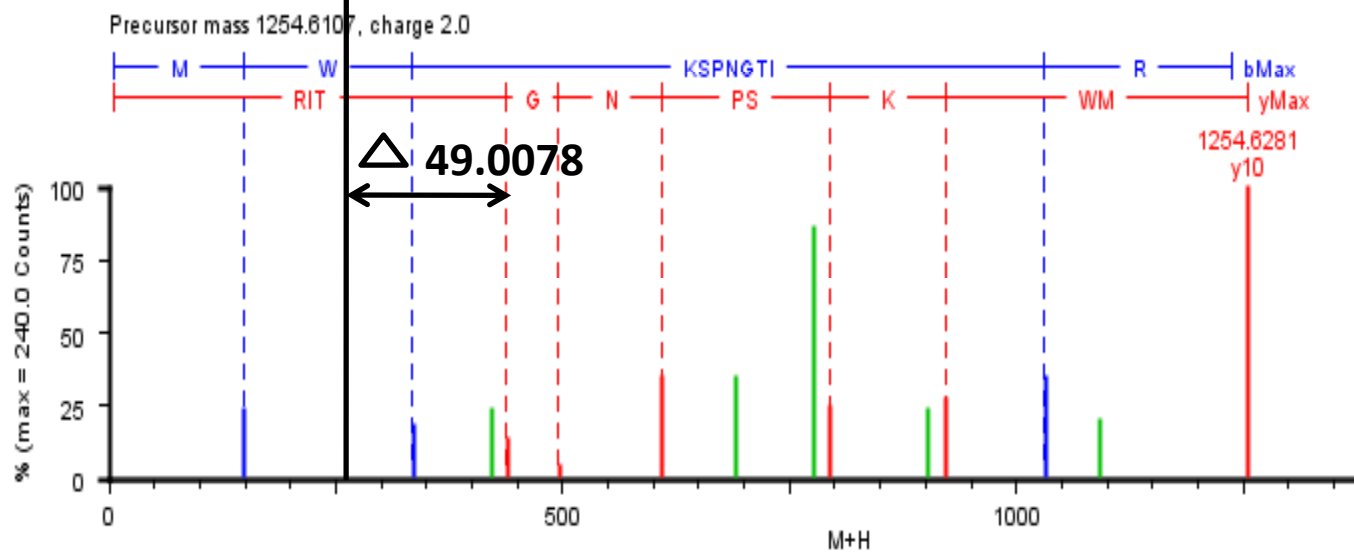

438.2558

131-140

(K)MWKSPNGTIR(MOLD)(N)

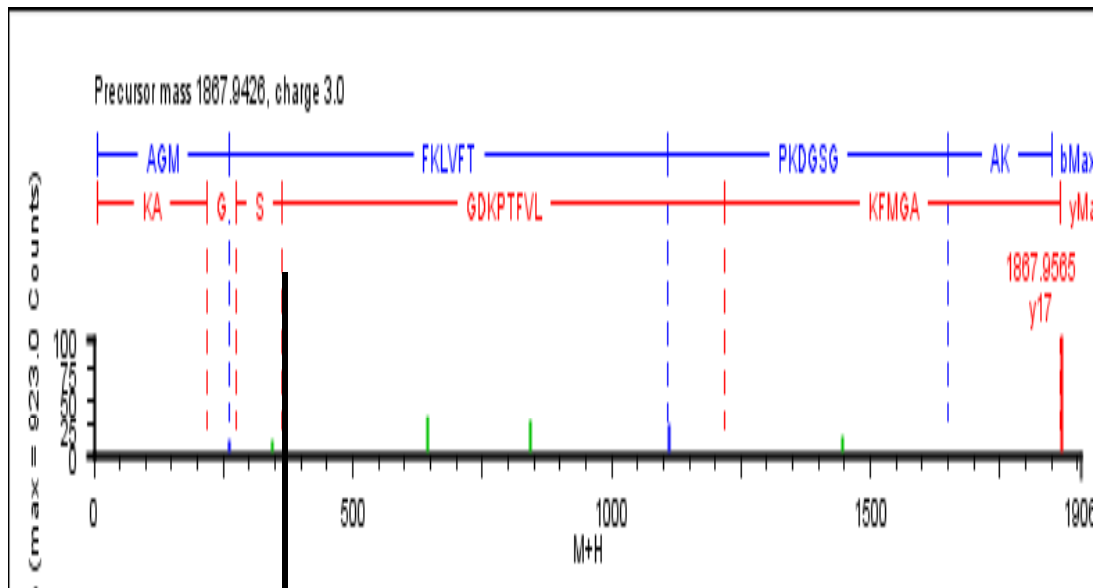

362.1801

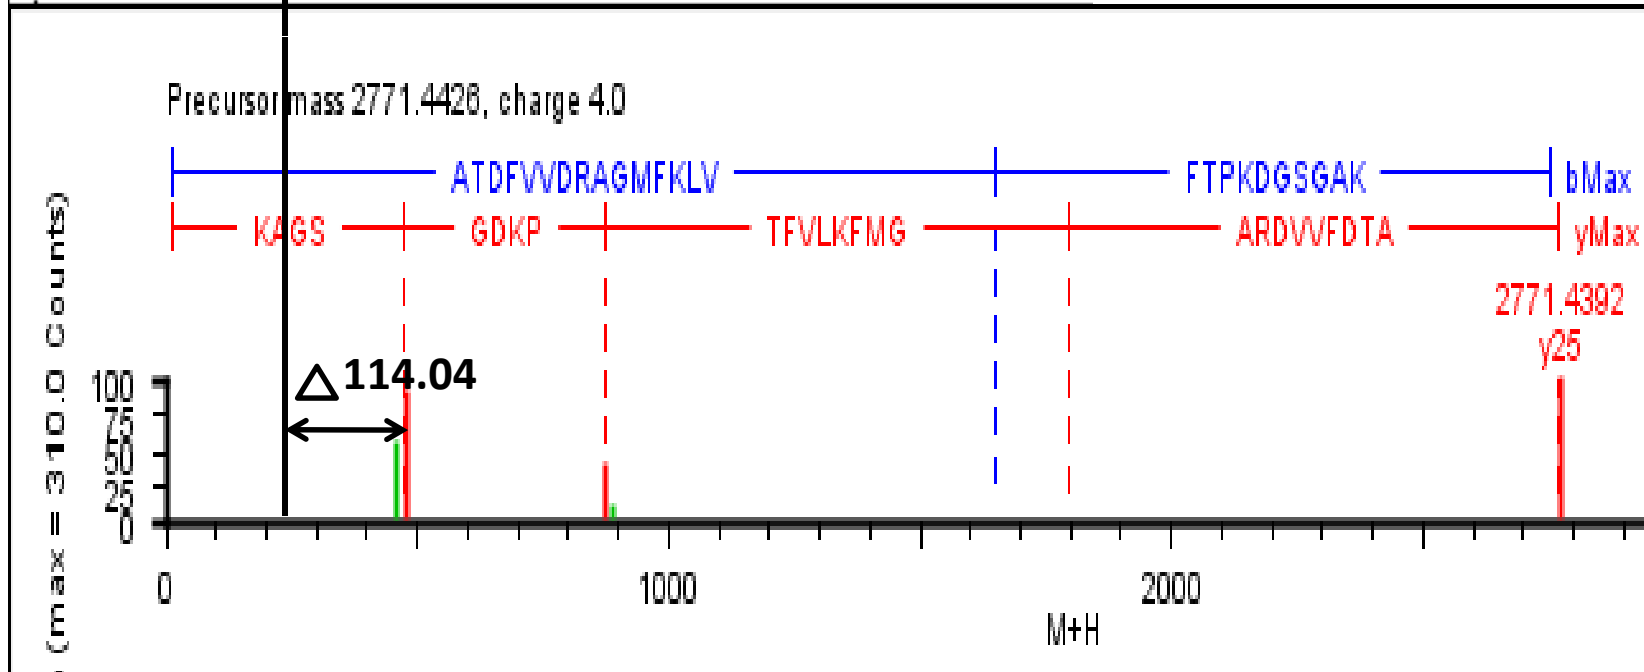

476.2037:  
(362.18+  
114.04)

181-205

(K)ATDFVDRAGMFKLVFTP~~K~~DGSGAK(Ubi)(E)

SOD

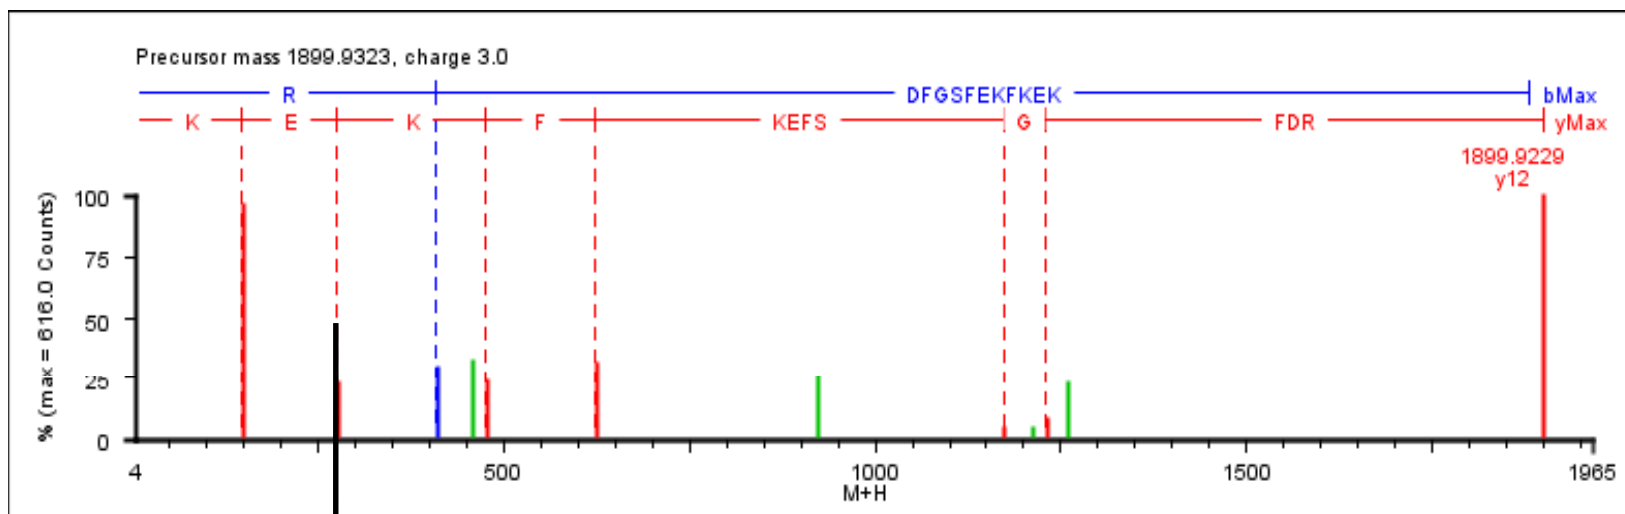

276.1479

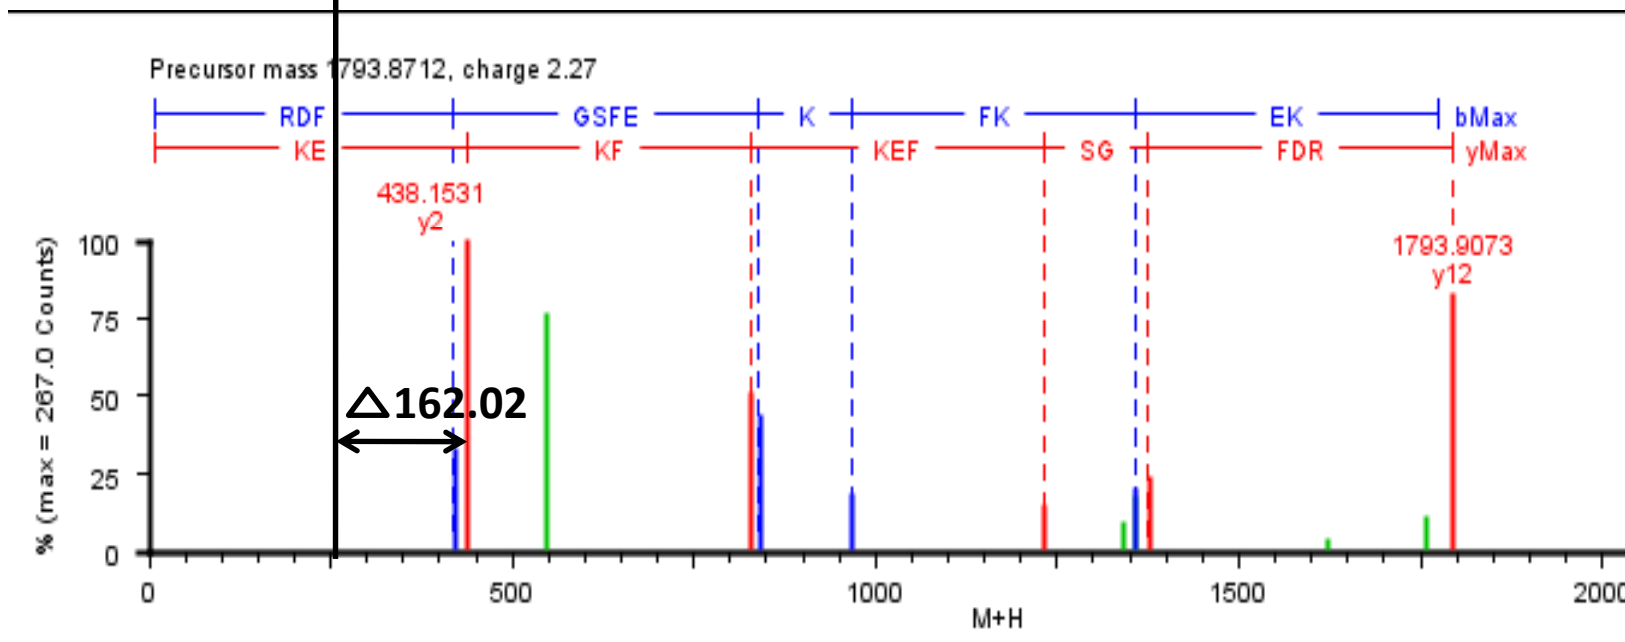

438.1531:  
(276.1479  
+162)

123-134

(K)RDFGSFEKFKEK(Gly)(L)

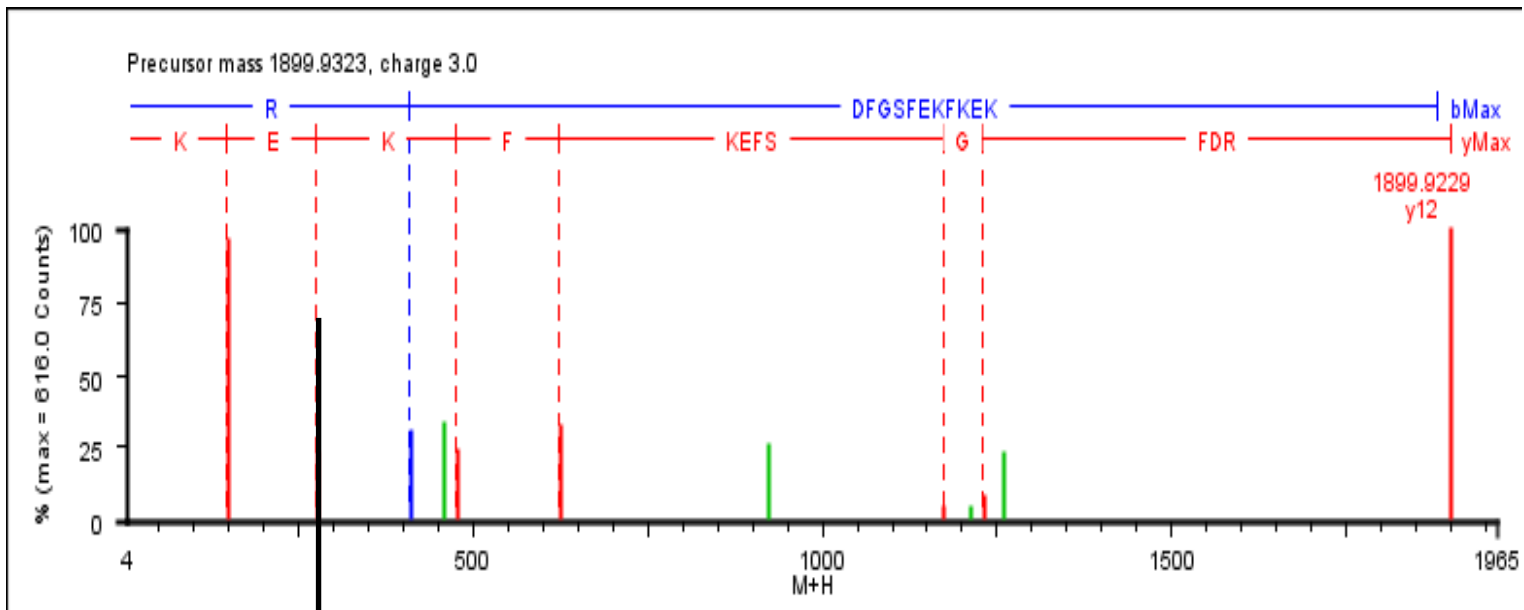

276.1479

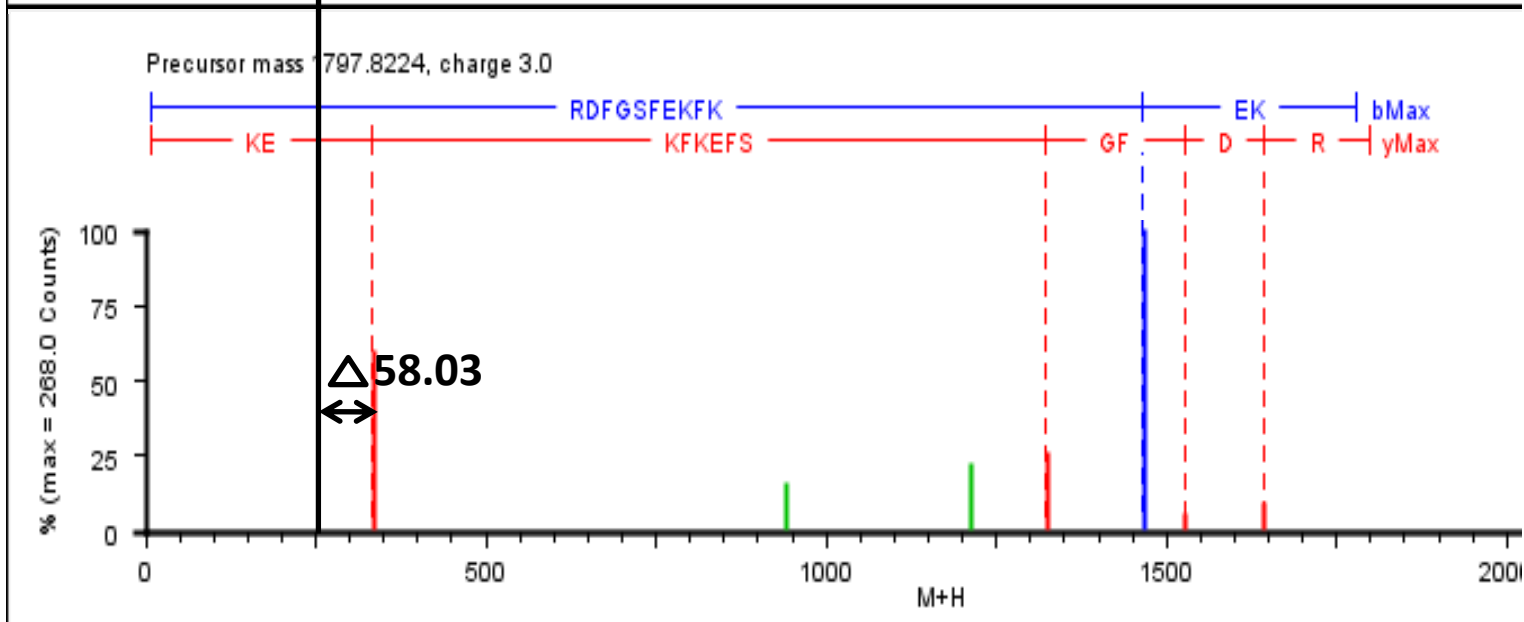

334.1845:  
(276.1479  
+ 58)

123-134

(K)RDFGSFEKFKEK(Pento)(L)

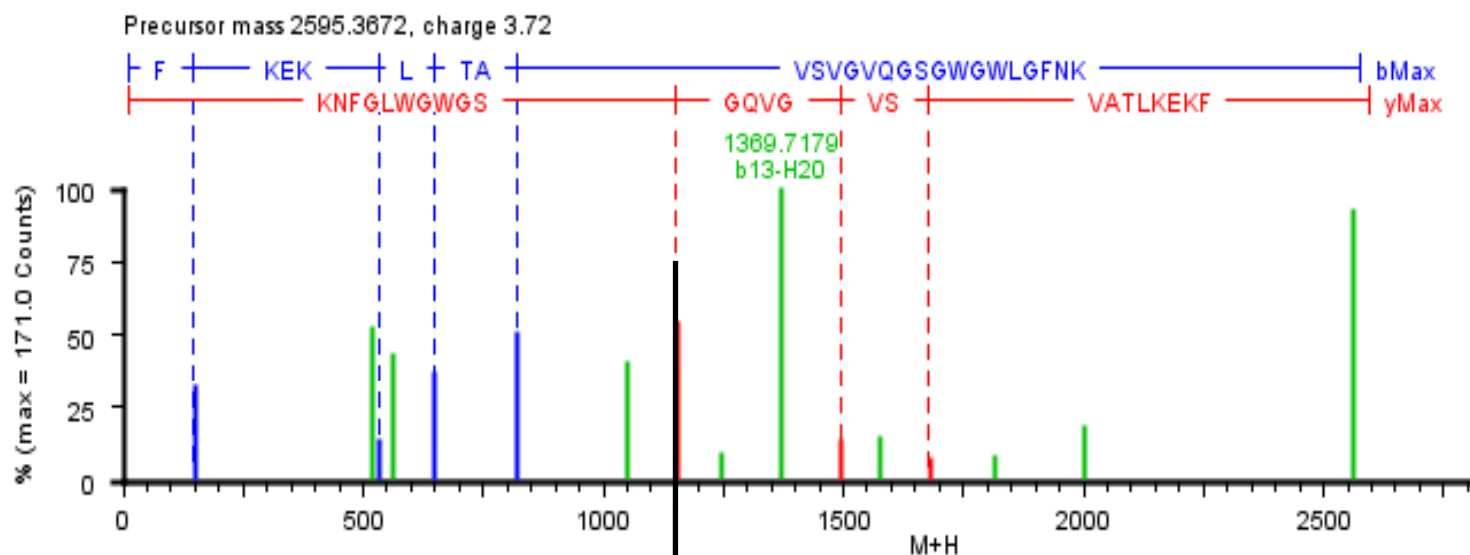

1151.567

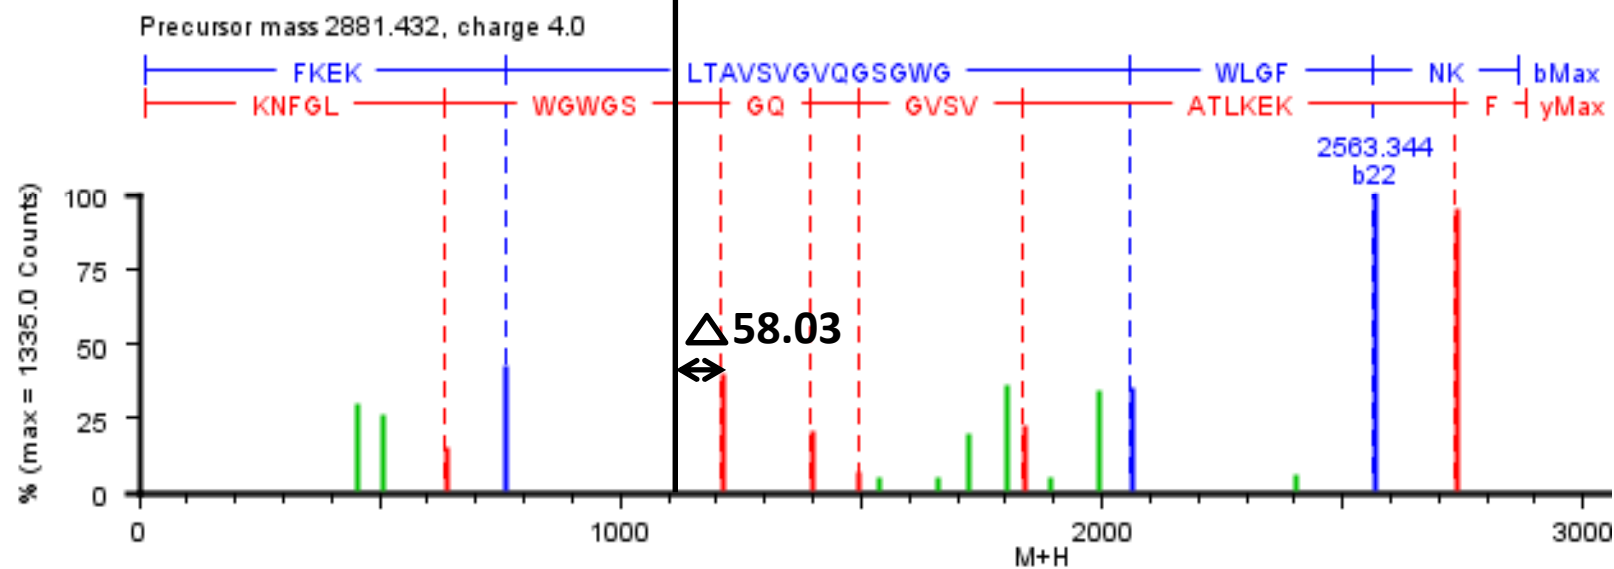

1209.5673:  
(1151.567+58)

131-154

(K)FKEKLTAVSVG VQGS GWLGFNK(Pento)(E)



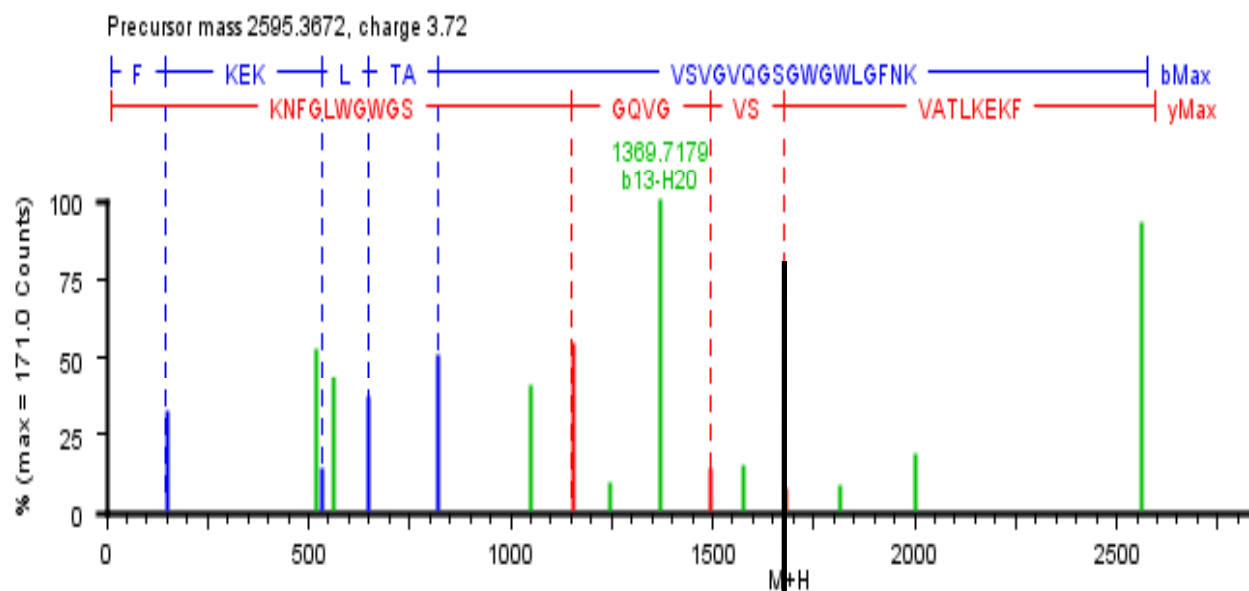

1678.9824

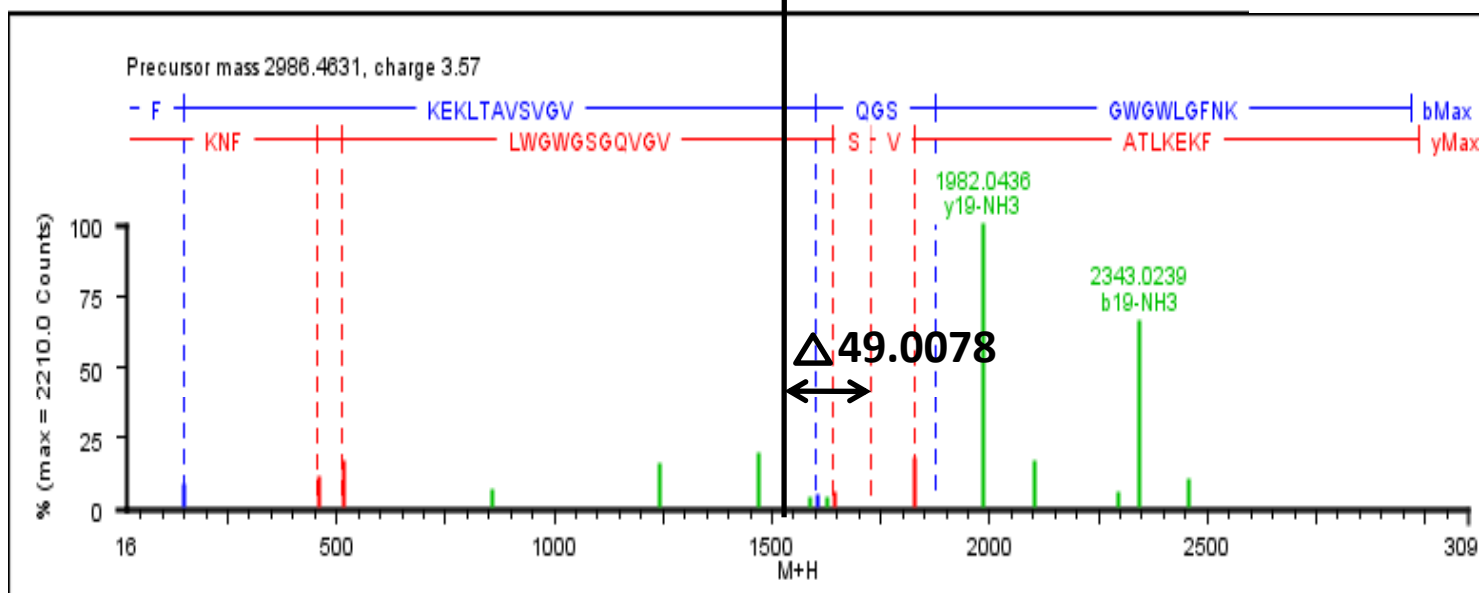

1727.8658:  
(1678.98+ 49)

131-154

(K)FKEKLTAVSVGVQGS GWLGFNK(MOLD)(E)

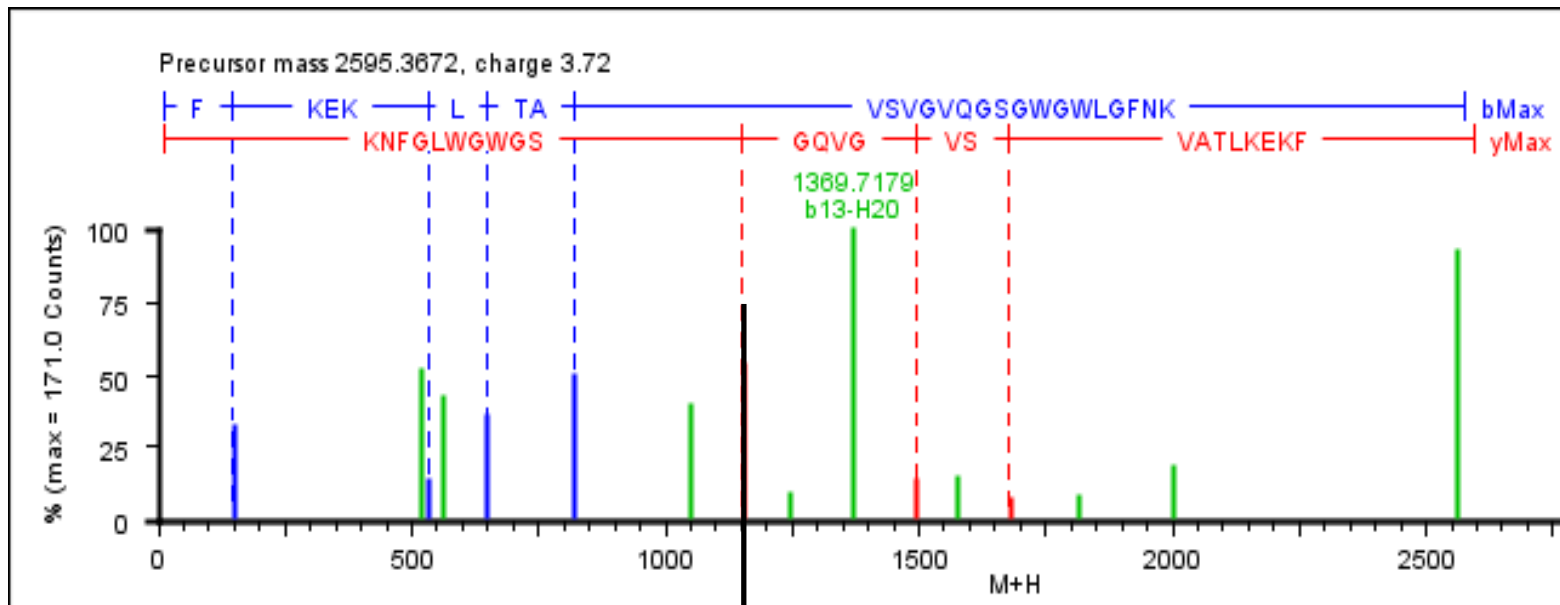

1151.567

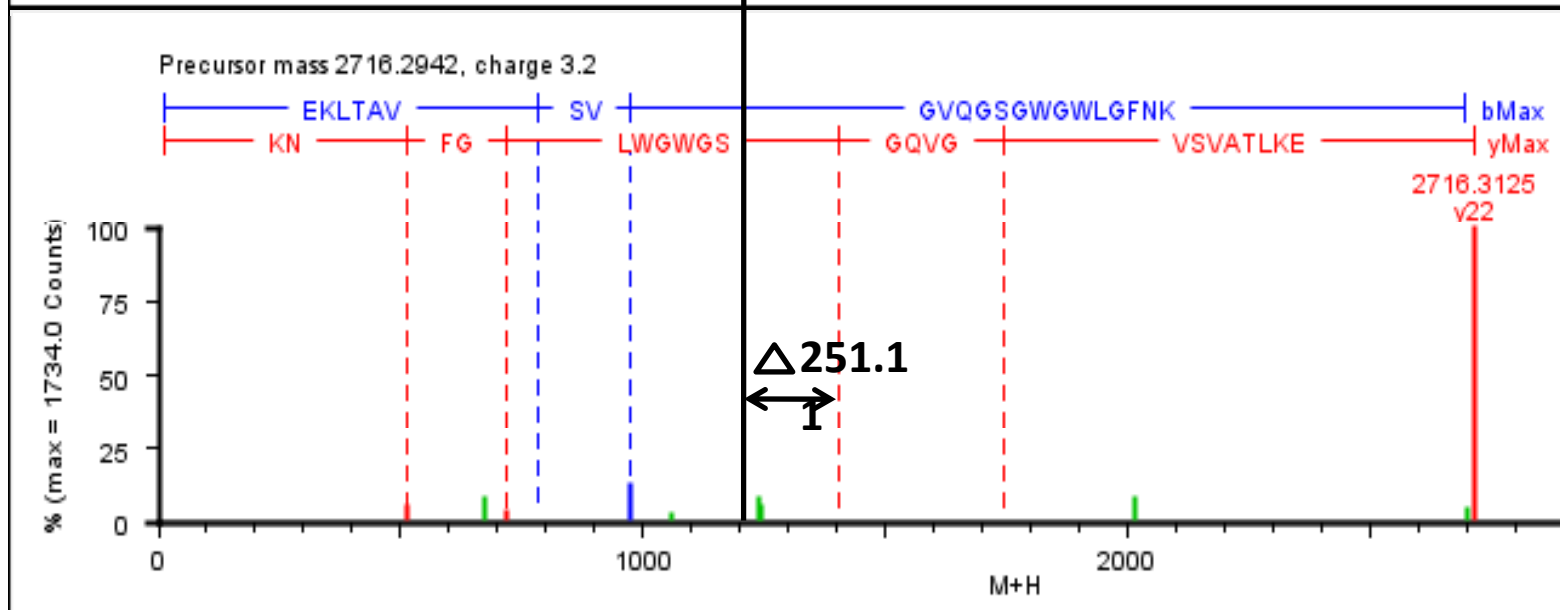

1403.5505:  
(1151.567+252)

133-154

(K)EKLTAVSVG VQGS GWLGFNK(Crossline)(E)

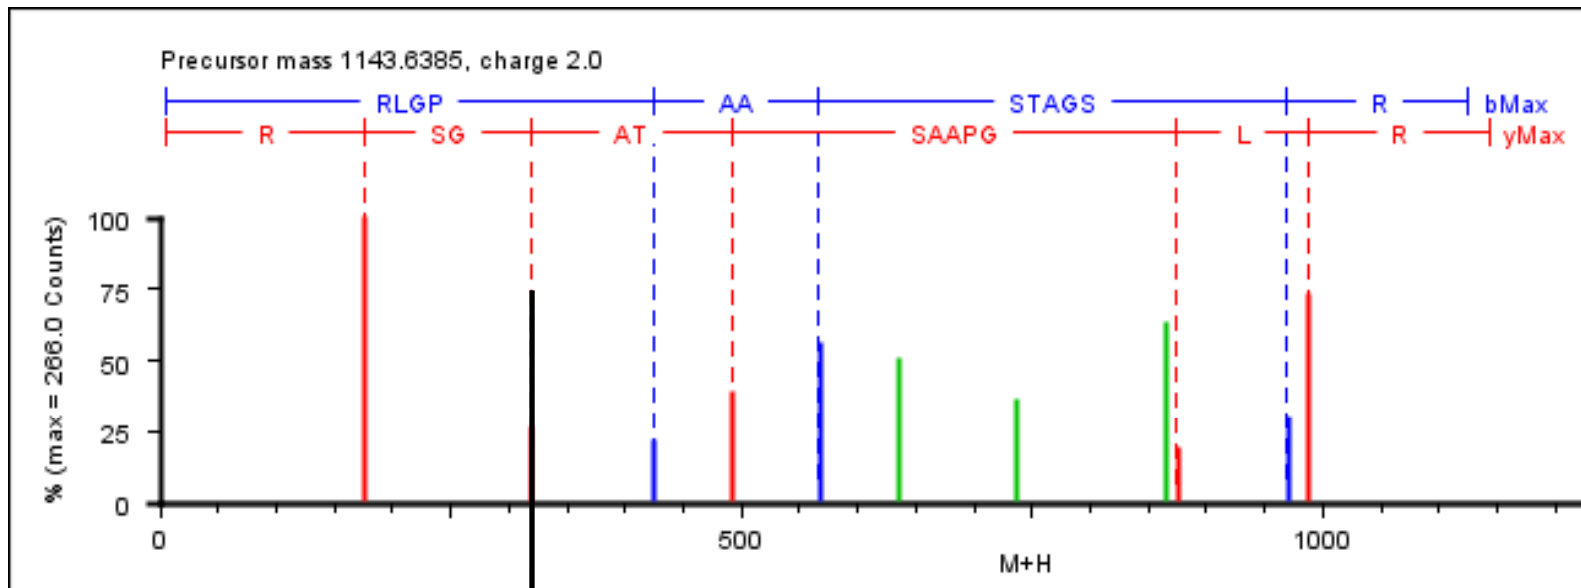

319.1342

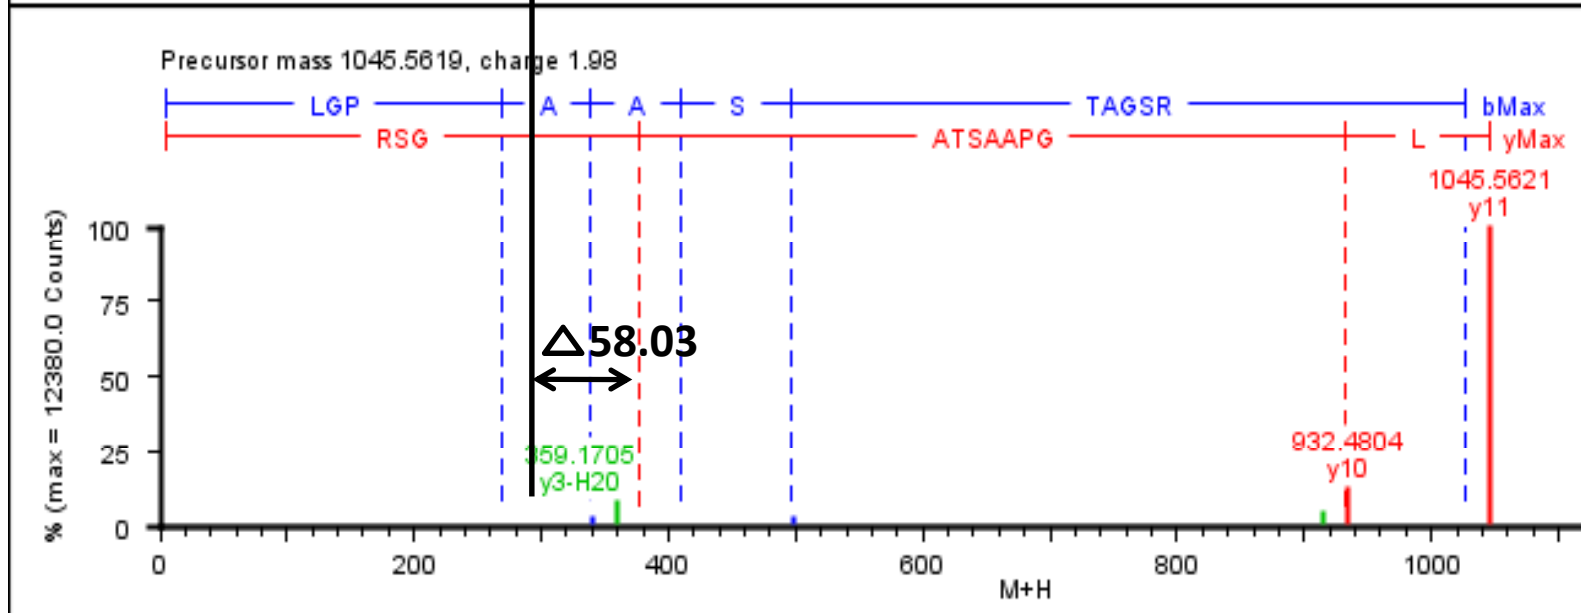

377.1741:  
(319.1342+58.03)

13-23

(R)LGPAASTAGSR(Pento)(H)

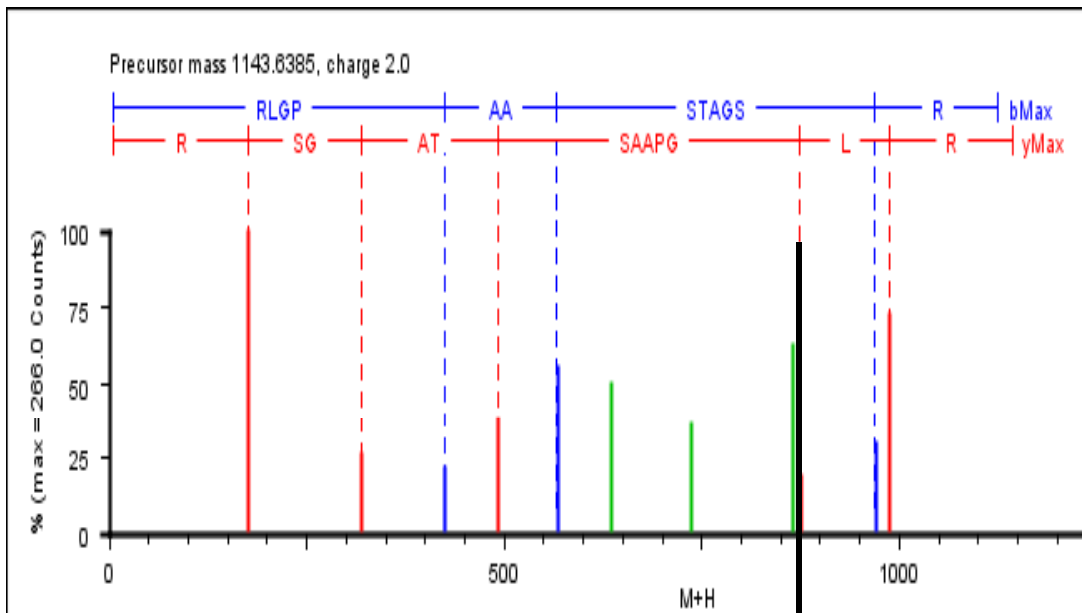

**874.487**

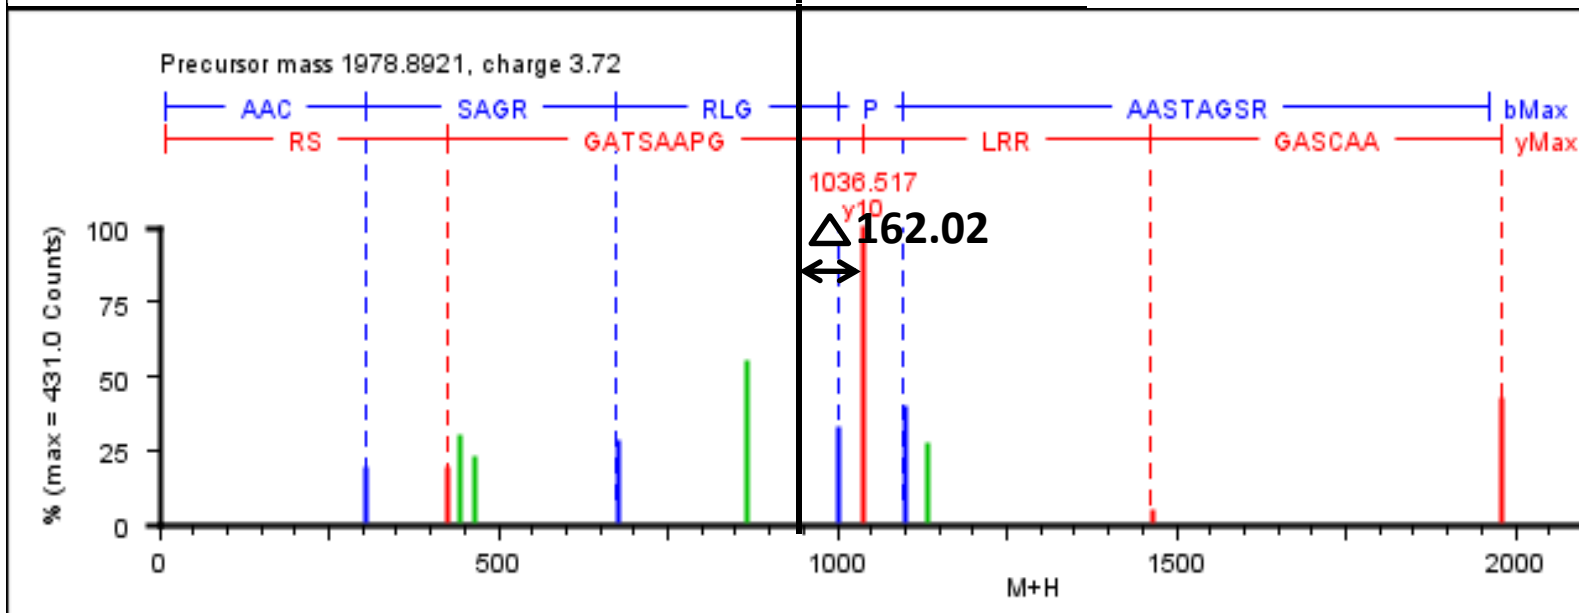

**1036.517:**  
**(874.487+162.0:**

**5-23**

**(R)AACSAGRRLGPAASTAGSR(Gly)(H)**

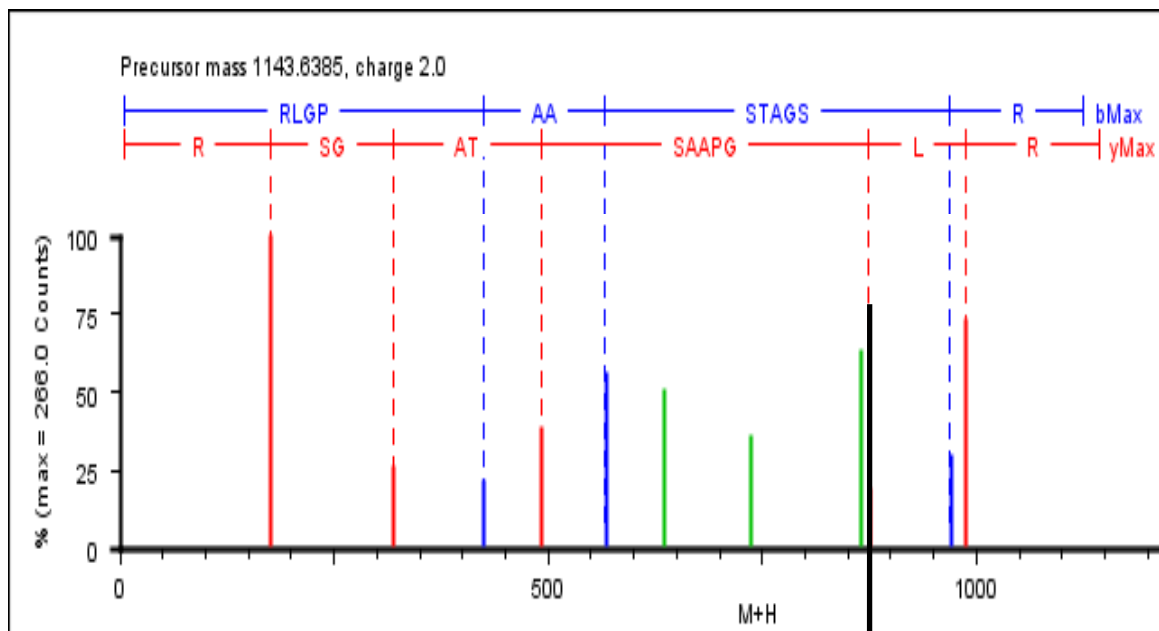

987.52

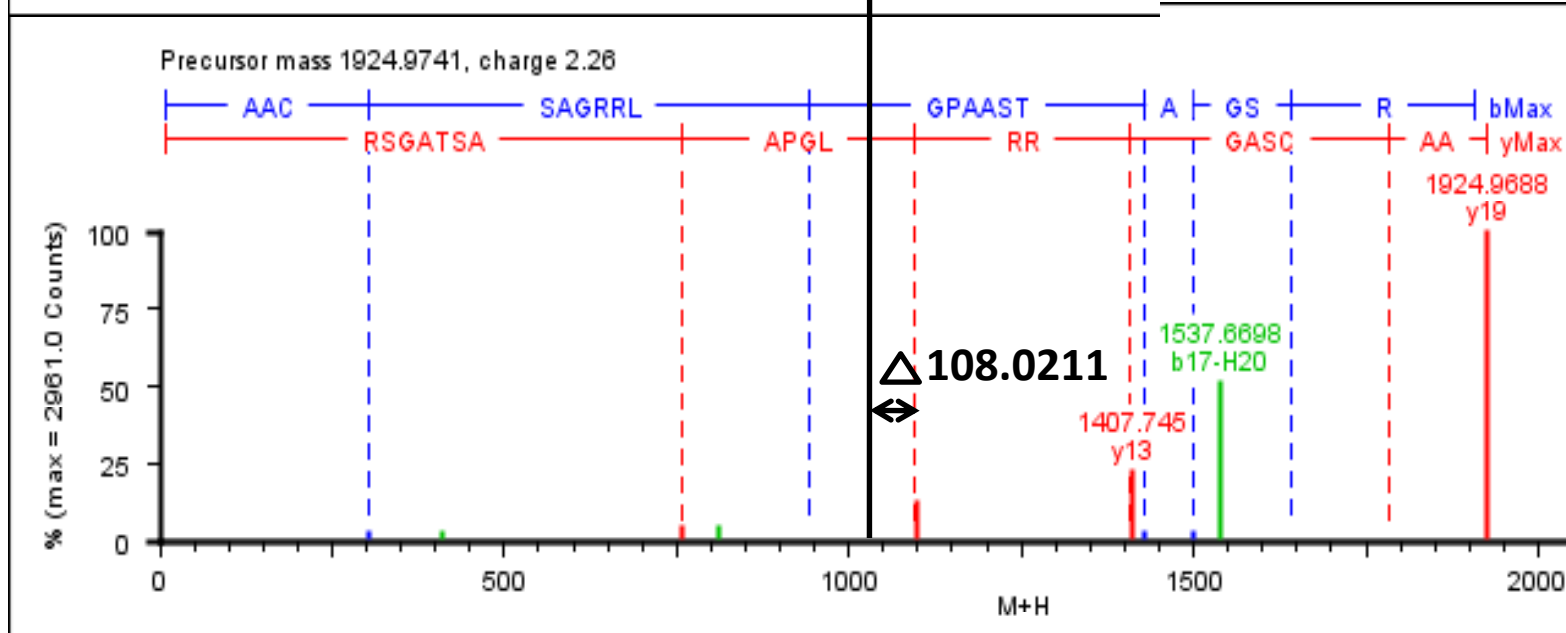

1095.53:  
(987.5205  
+108.02)

5-23

(R)AACSAGRRLGPAASTAGSR(Pyr)(H)

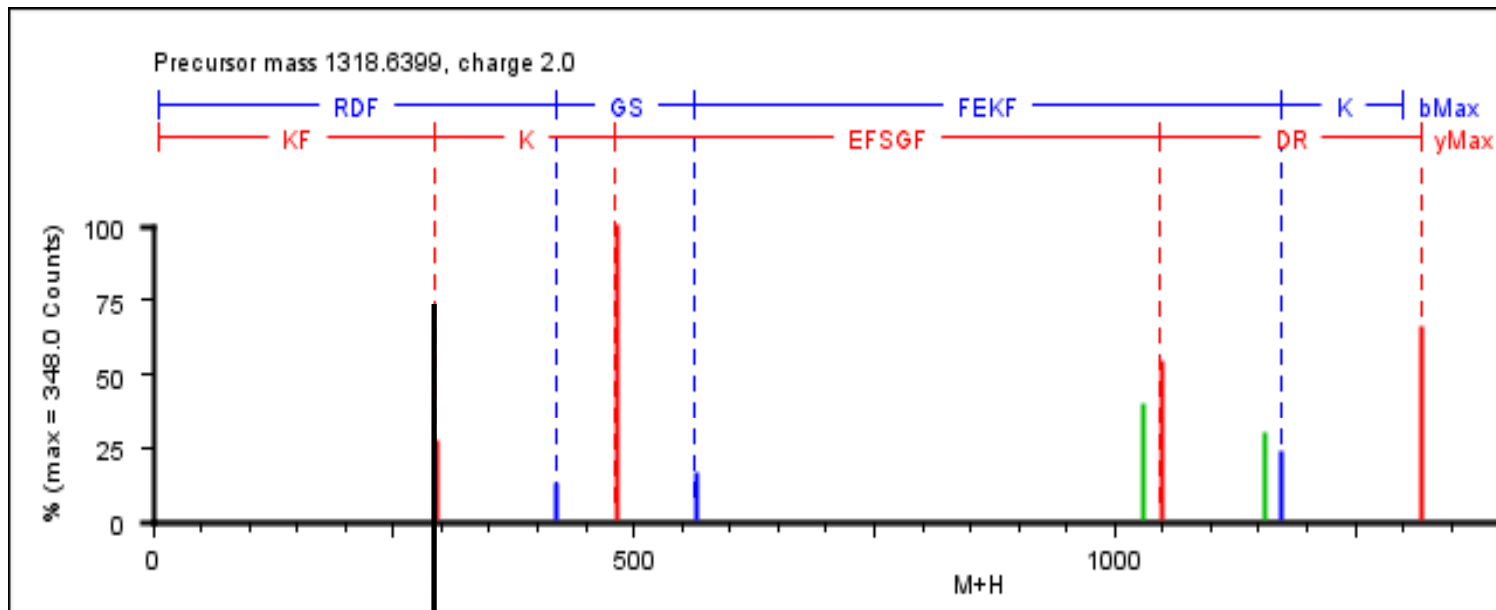

294.189

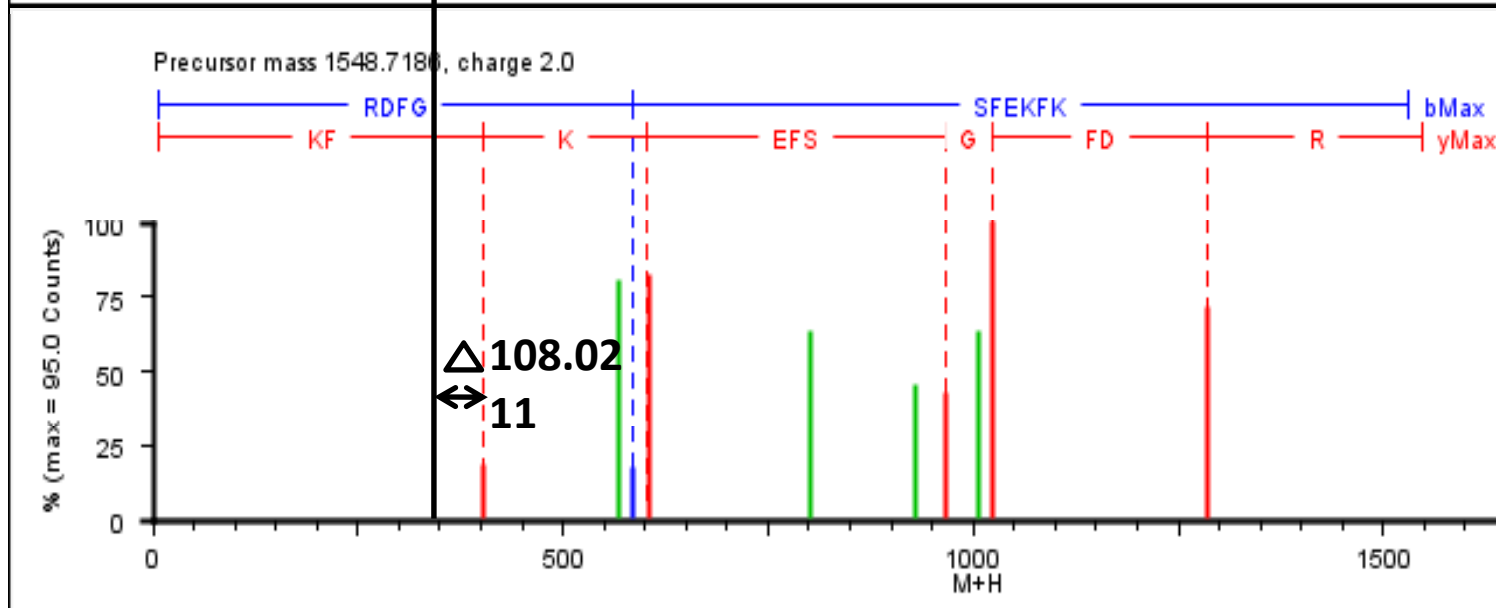

402.2085:  
(294.189+108)

123-132

(K)RDFGSFEKFK(Pyr)(E)

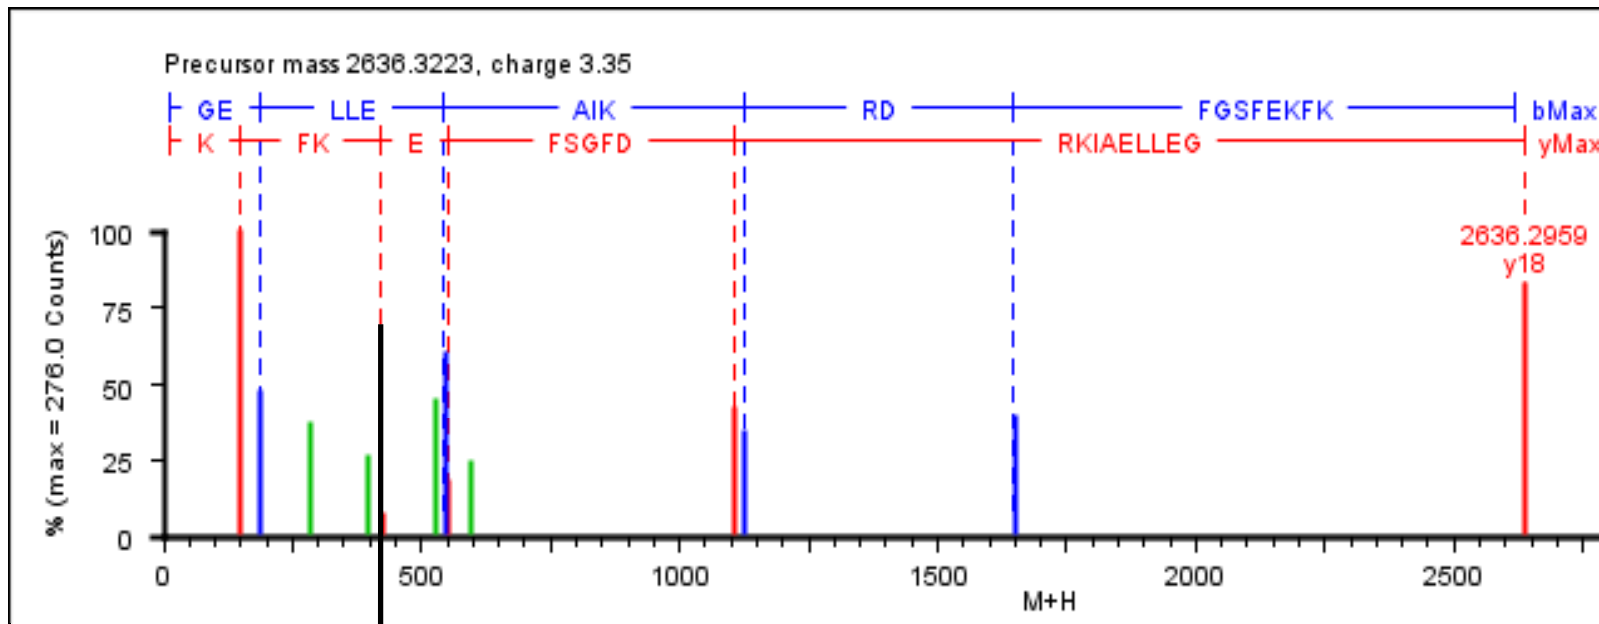

422.2997

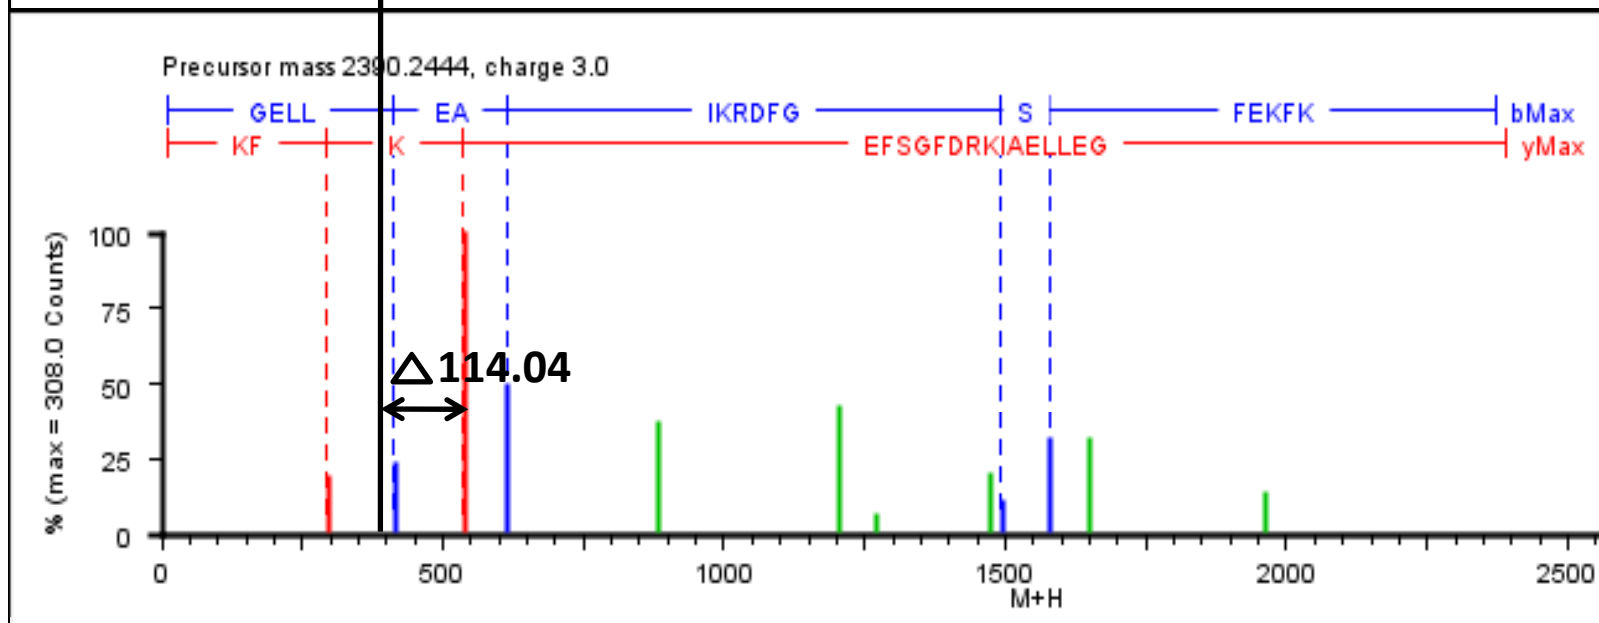

536.2785:  
(422.29+ 114.04)

115-132

(K)GELLEAIKRDFGSFEK(Ubi)FK(E)

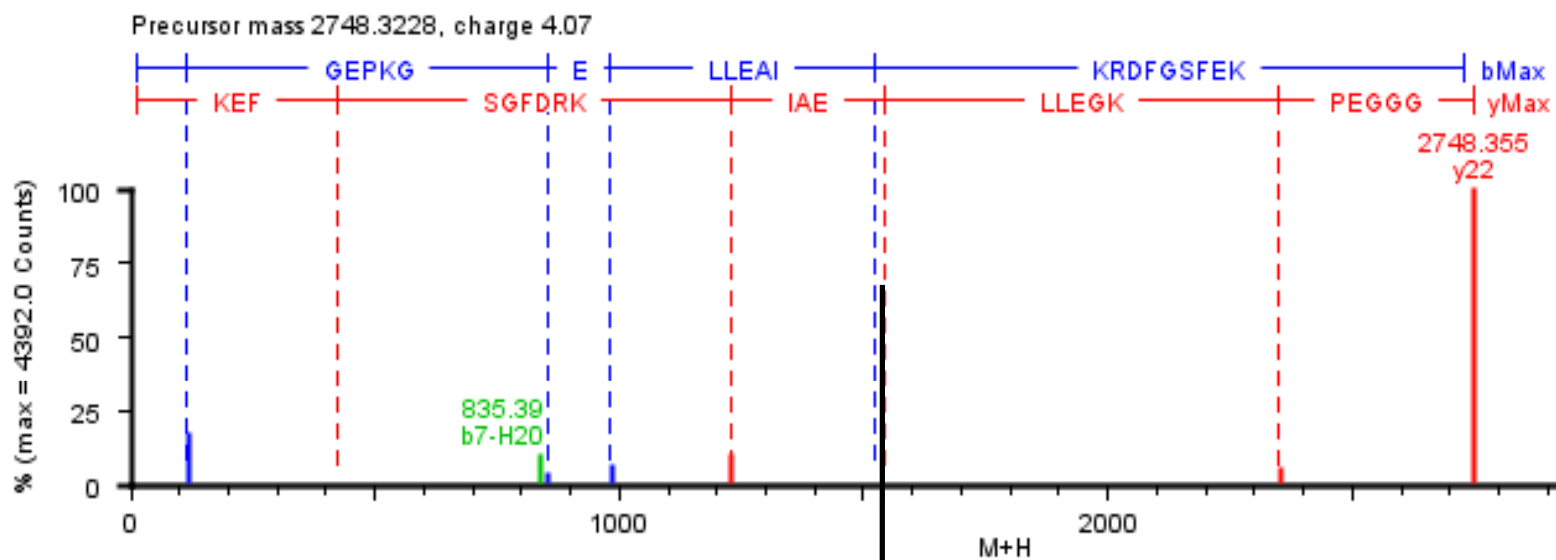

1484.8413

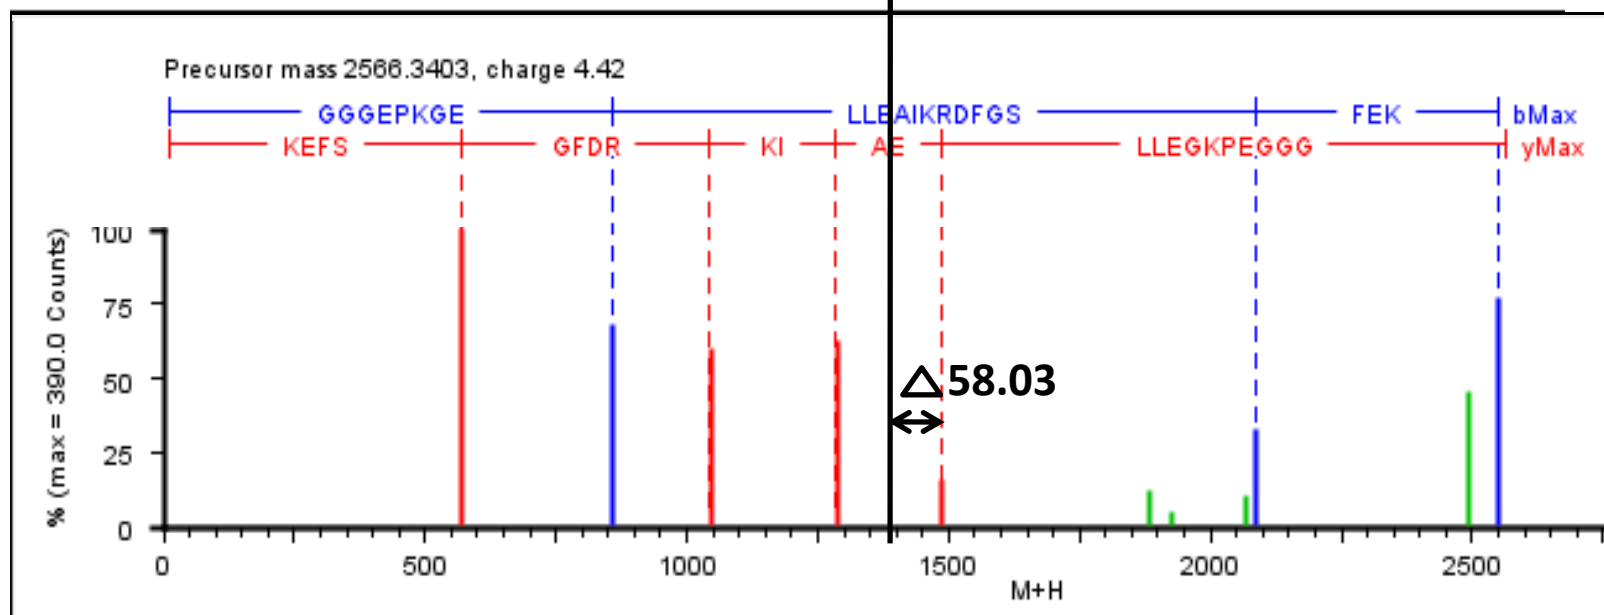

1540.7725:  
(1484.84+ 58.03)

109-130

(K)GGGEPKGELLEAIKRDFGSFEK(Pento)(F)



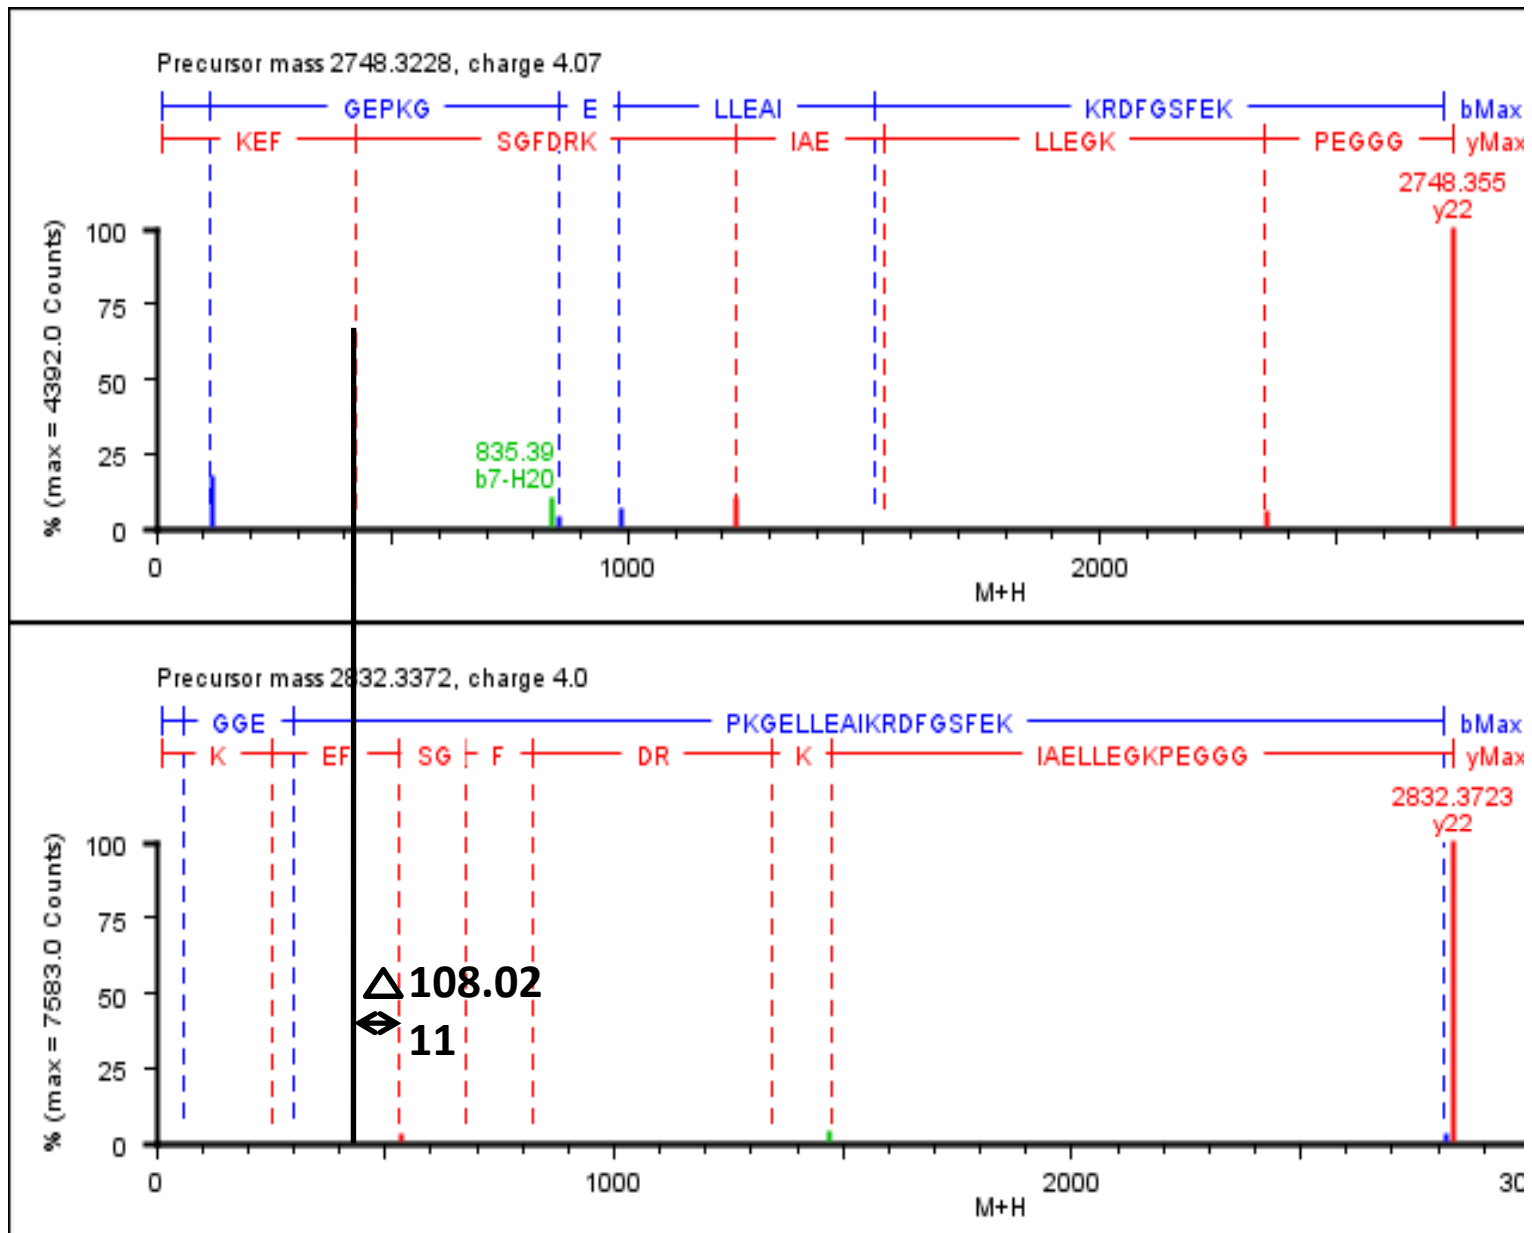

**423.1844**

**531.676:**  
**(423.1844+108.0)**

**109-130**

**(K)GGGEPKGELLEAIKRDFGSFEK(Pyr)(F)**

ATP Alpha

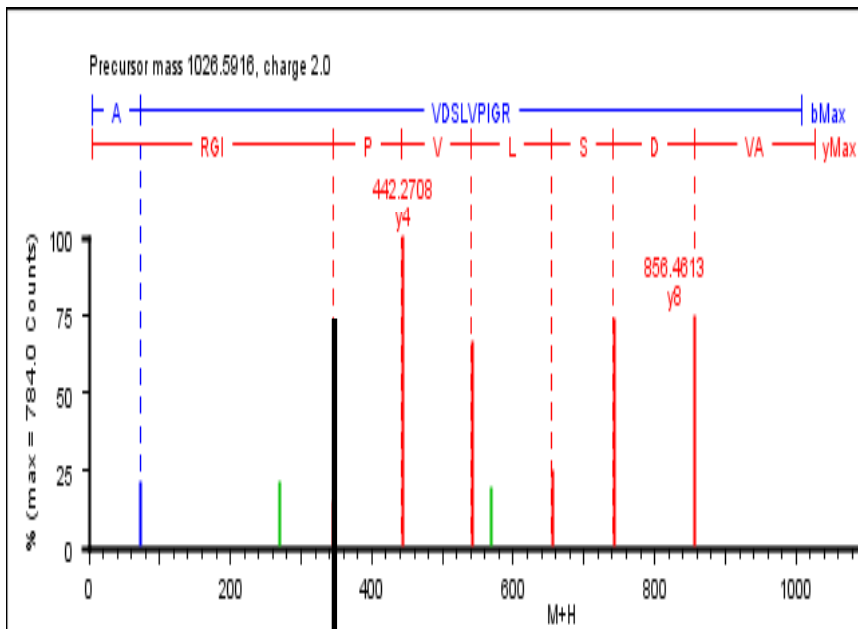

345.2166

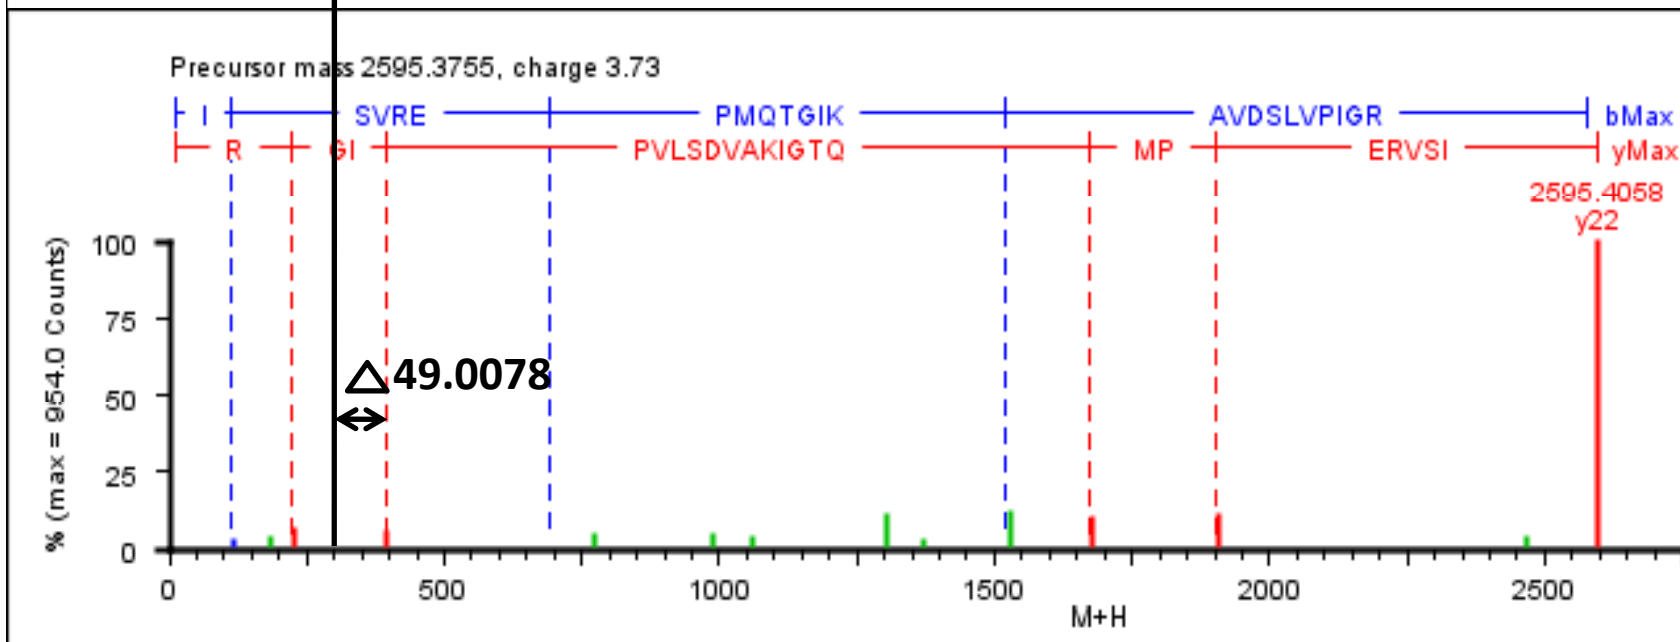

394.2203:  
(345.2166  
+ 49.00)

195-204

(R)ISVREPMQTGIKAVDSLVPPIGR(MOLD)(G)

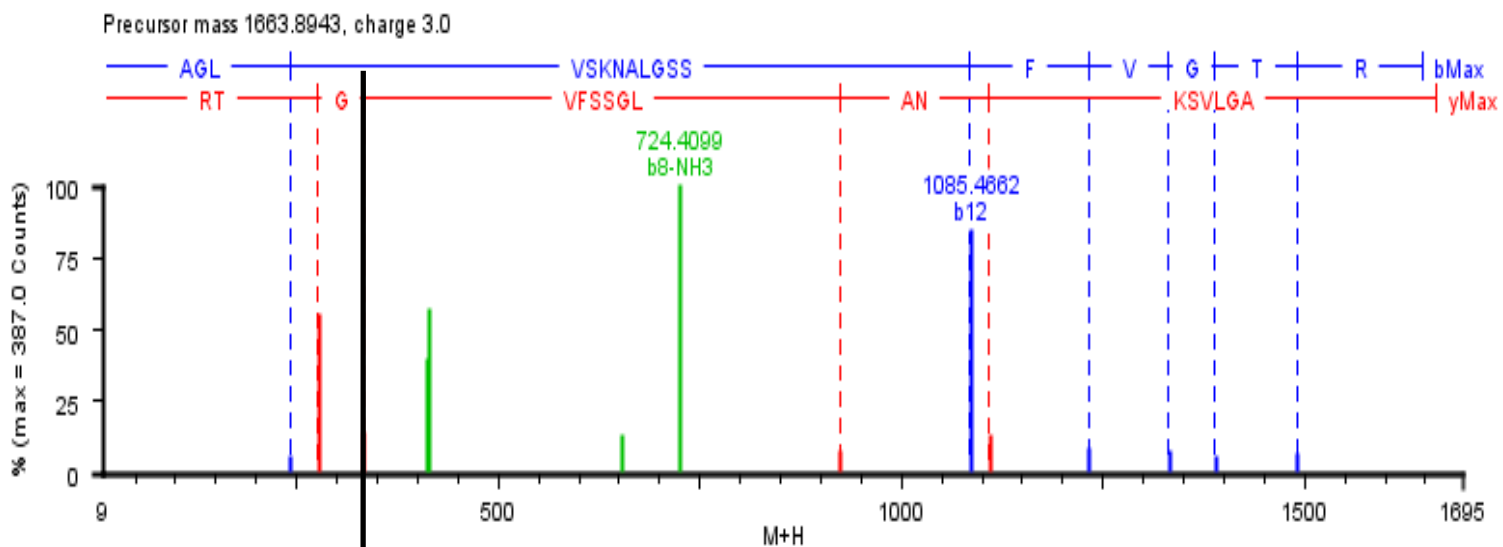

333.2027

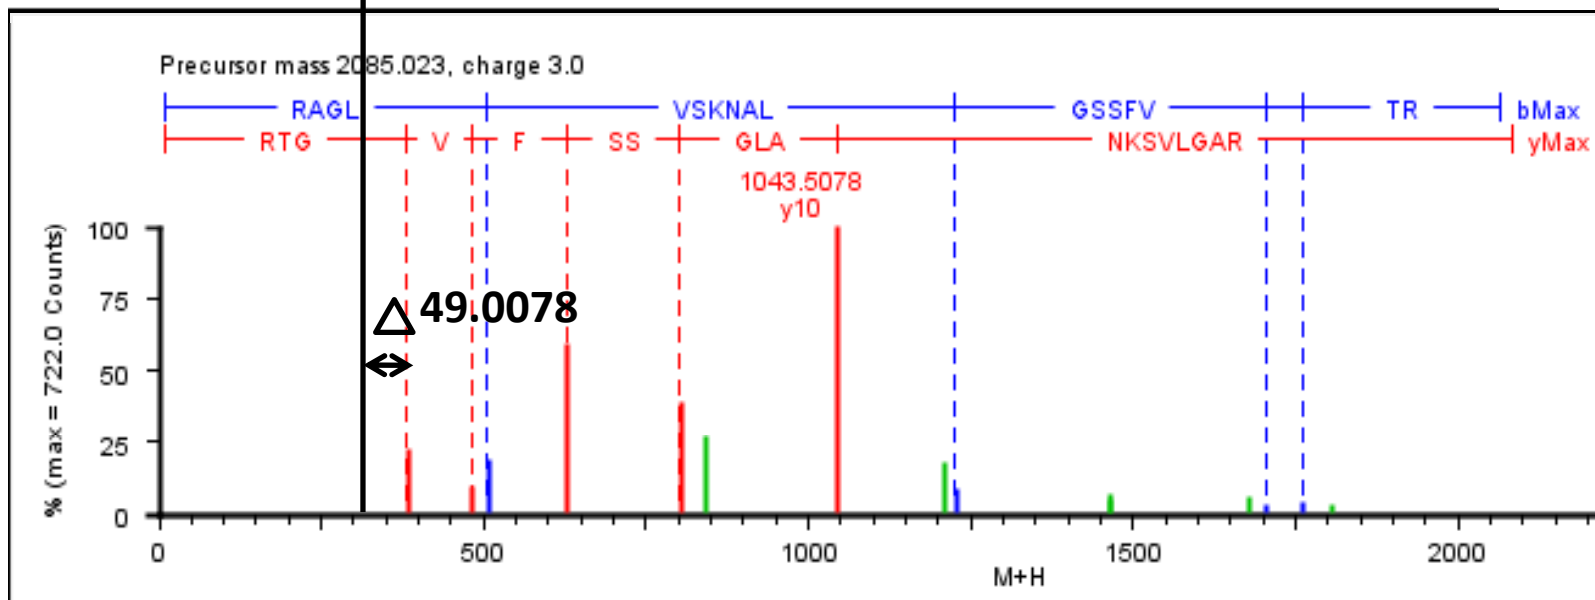

382.1598:  
(333.2027  
+ 49.00)

18-34

(R)RAGLVSKNALGSSFVGTR(MOLD)(N)

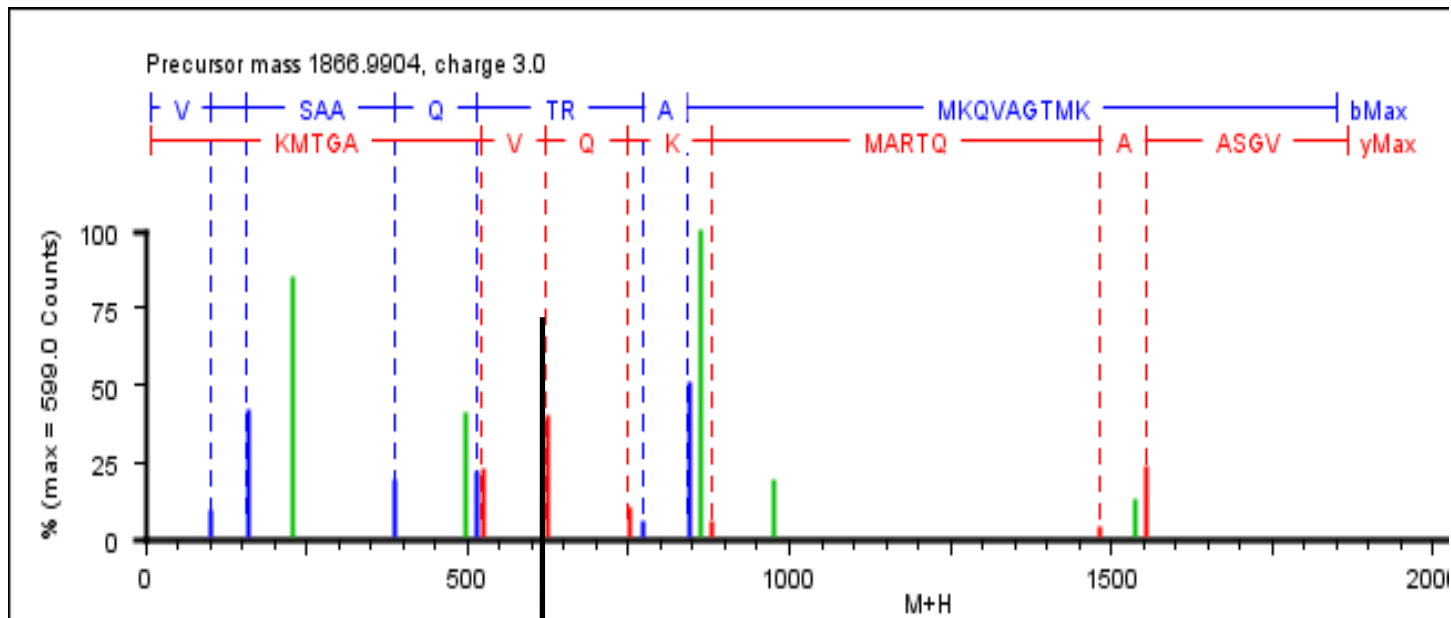

607.3415

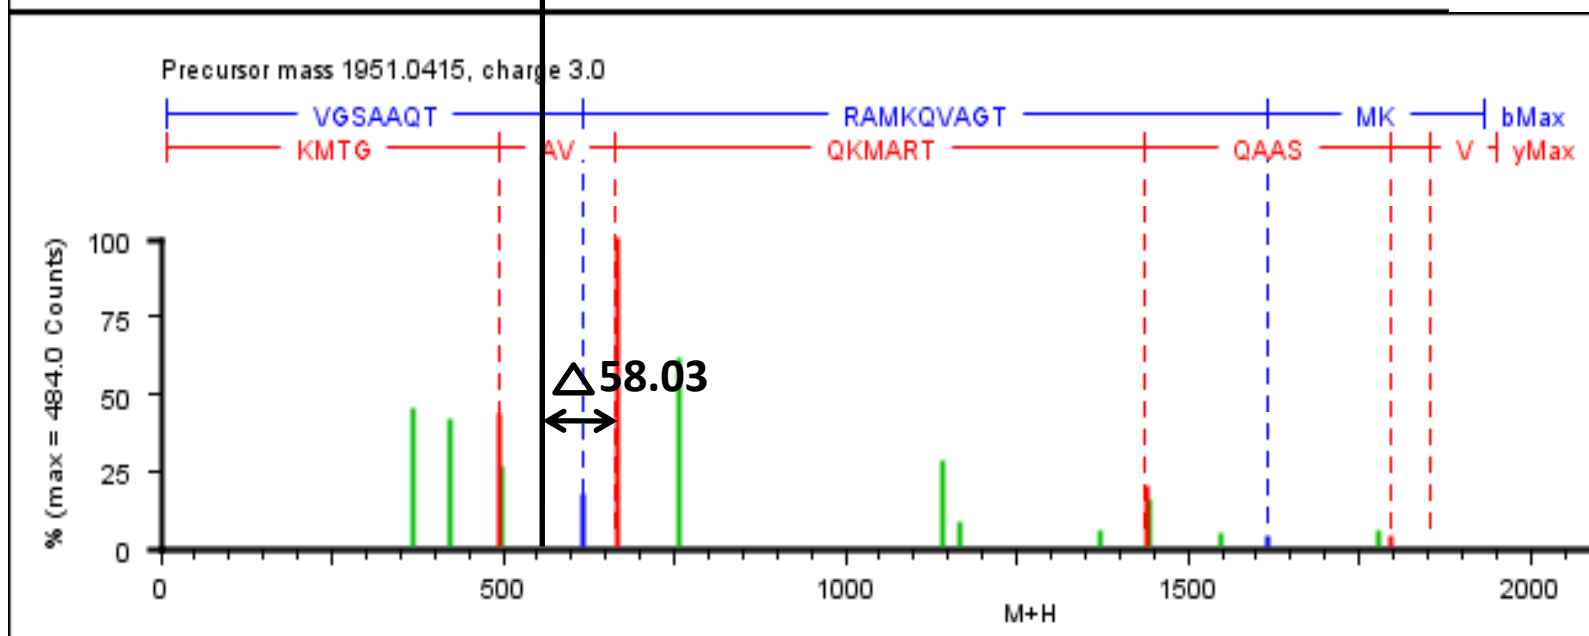

664.3415:  
(607.34+  
58.03)

417-434

(R)VGSAAQTRAMKQVAGTMK(MOLD)(L)

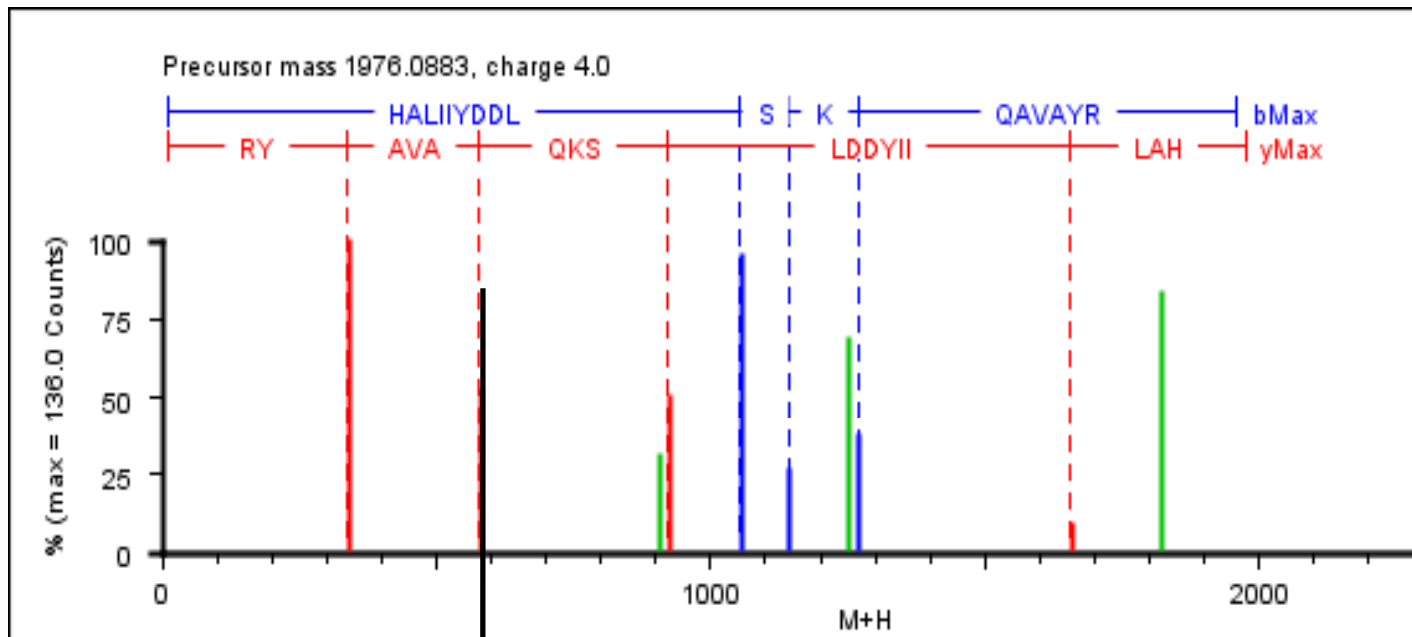

579.3374

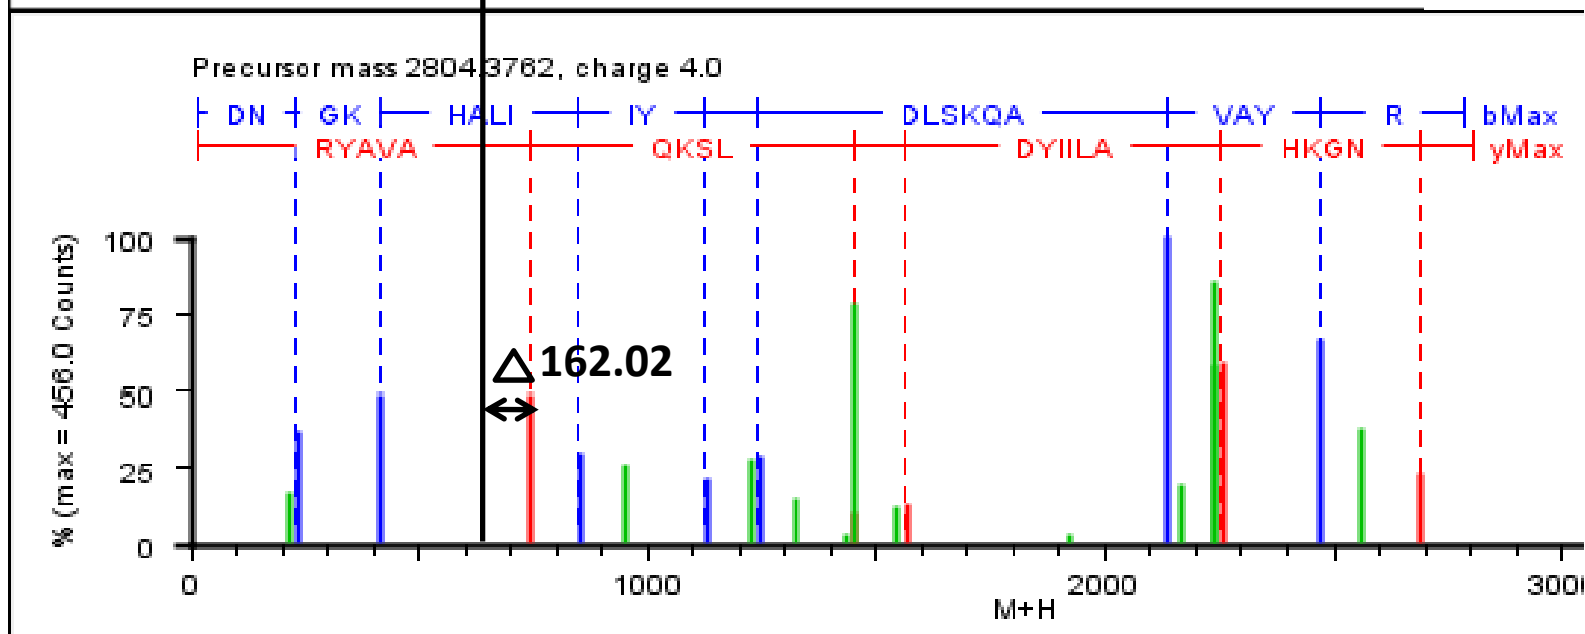

741.3374:  
 (579.2902  
 + 162.02

306-322

(K)HALIYDDL**SK**QAVAY**R(Gly)**(Q)

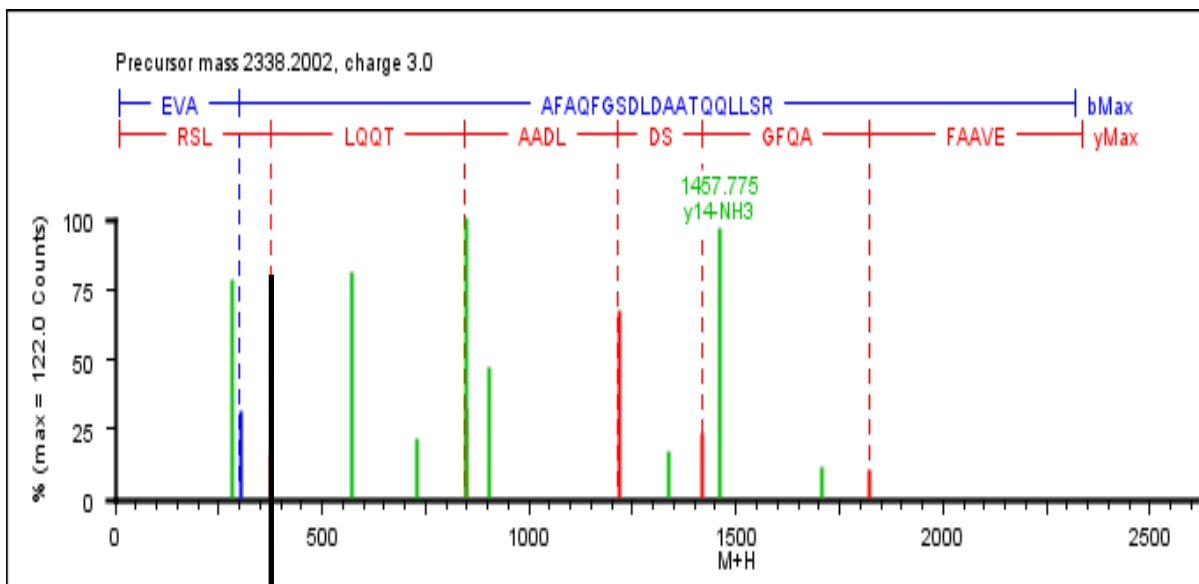

375.2097

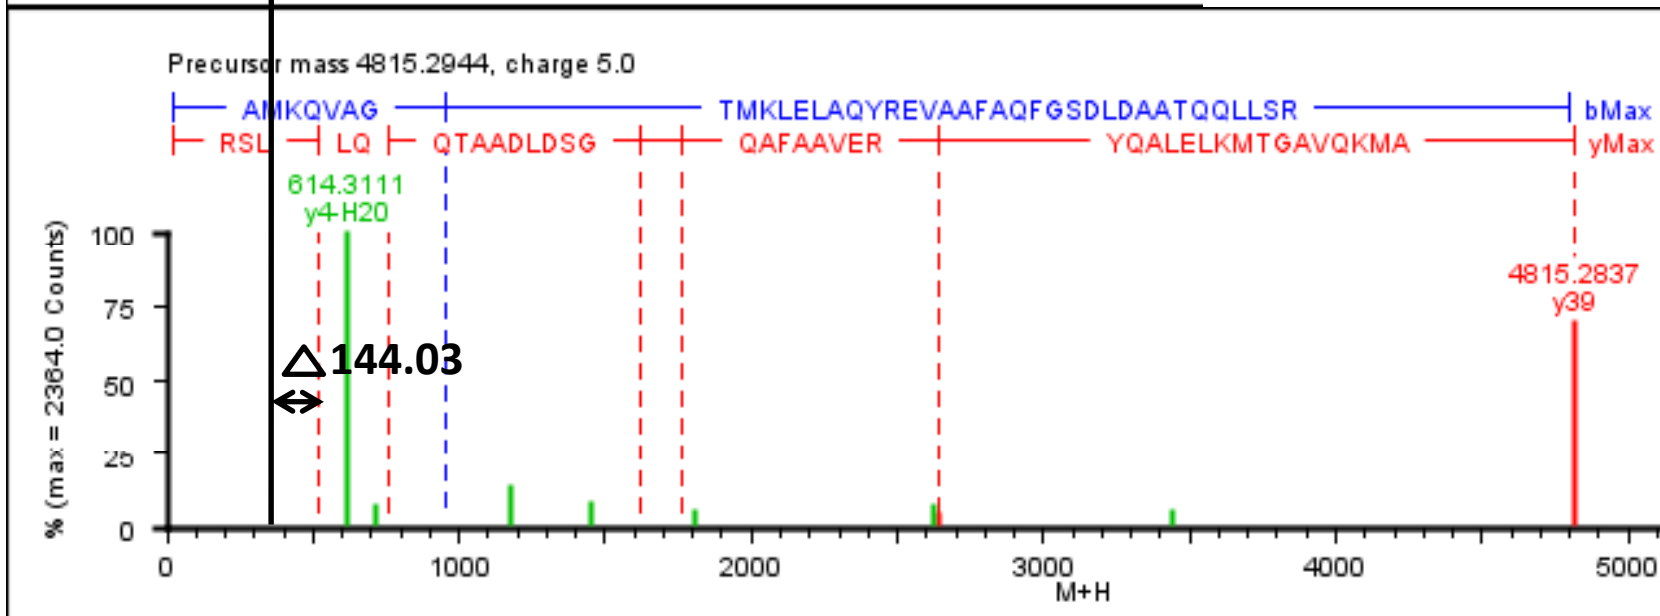

519.2749:  
(375.20  
+144.03)

425-463

(R)AMKQVAGTMKLELAQYREVAFAQFGSDLEDAATQQLLSR(ImiA)(G)

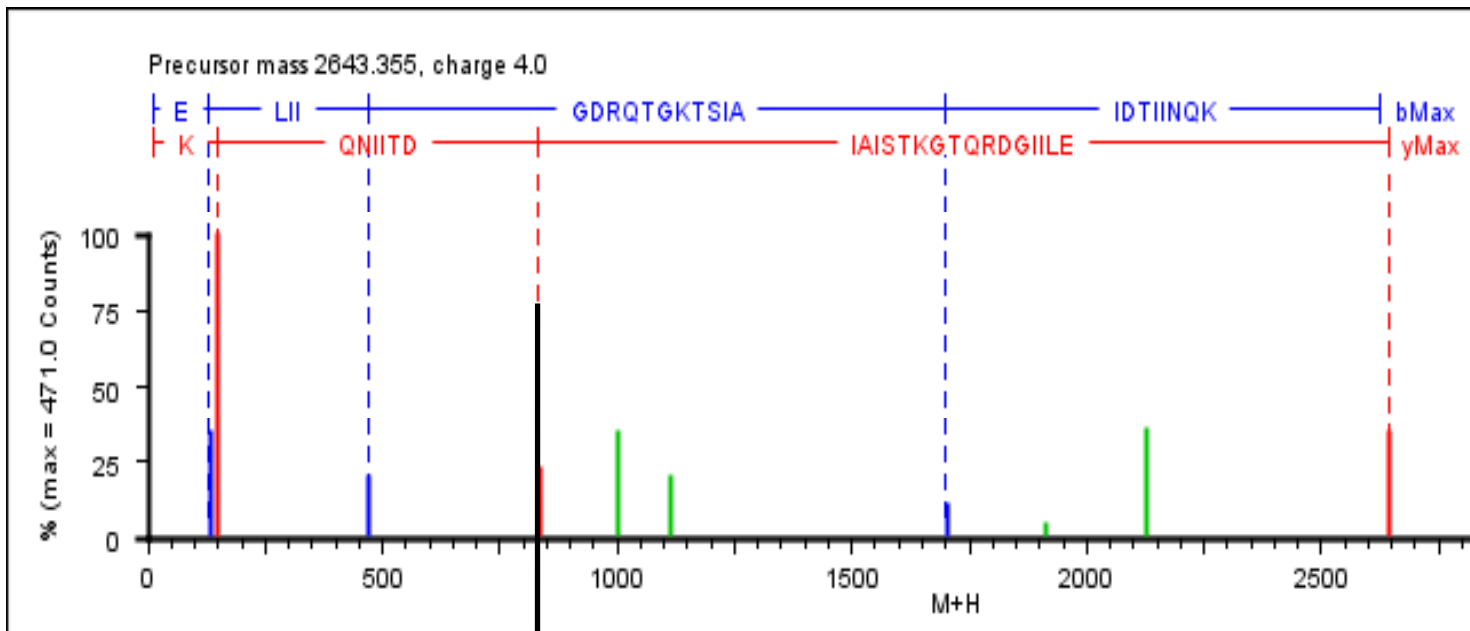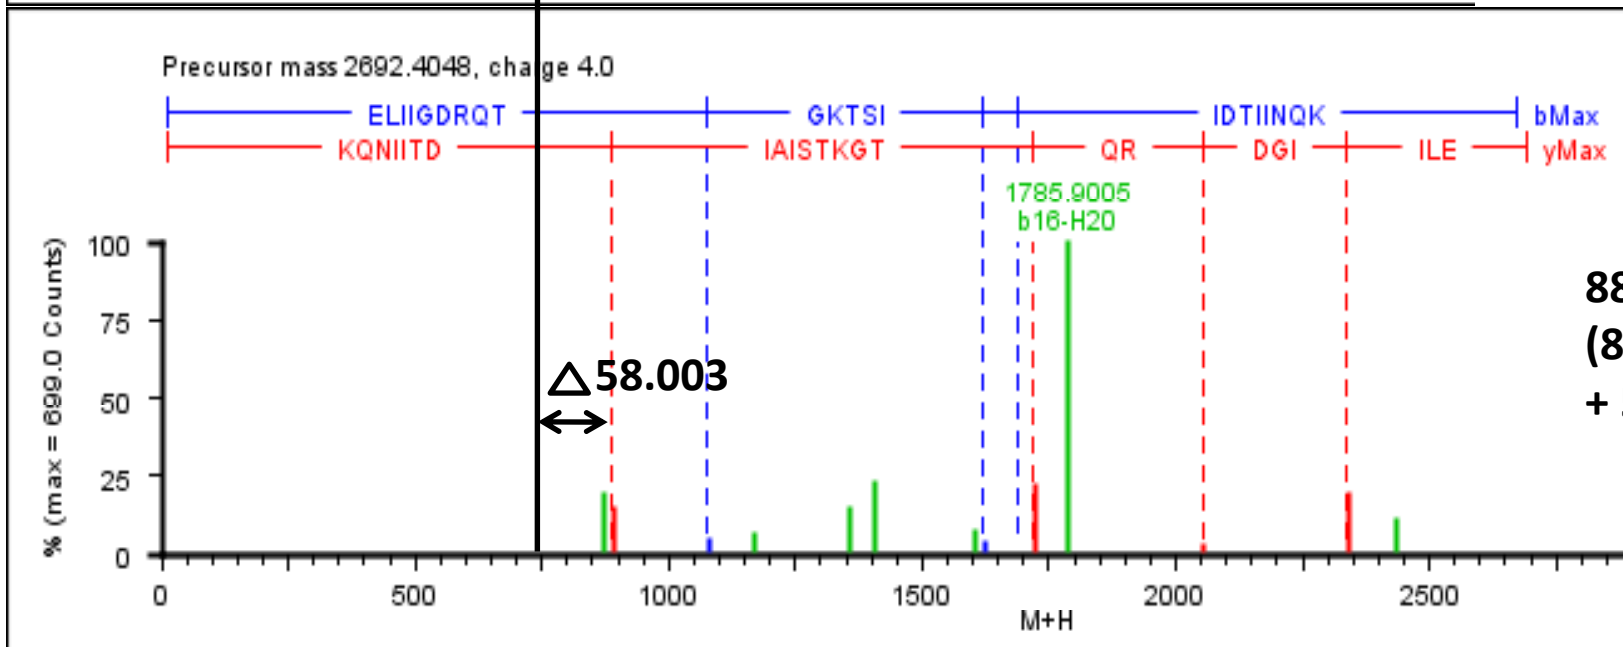

375.2097

(R)ELIIGDRQTGKTSIAIDTIINQK(CML)(R)



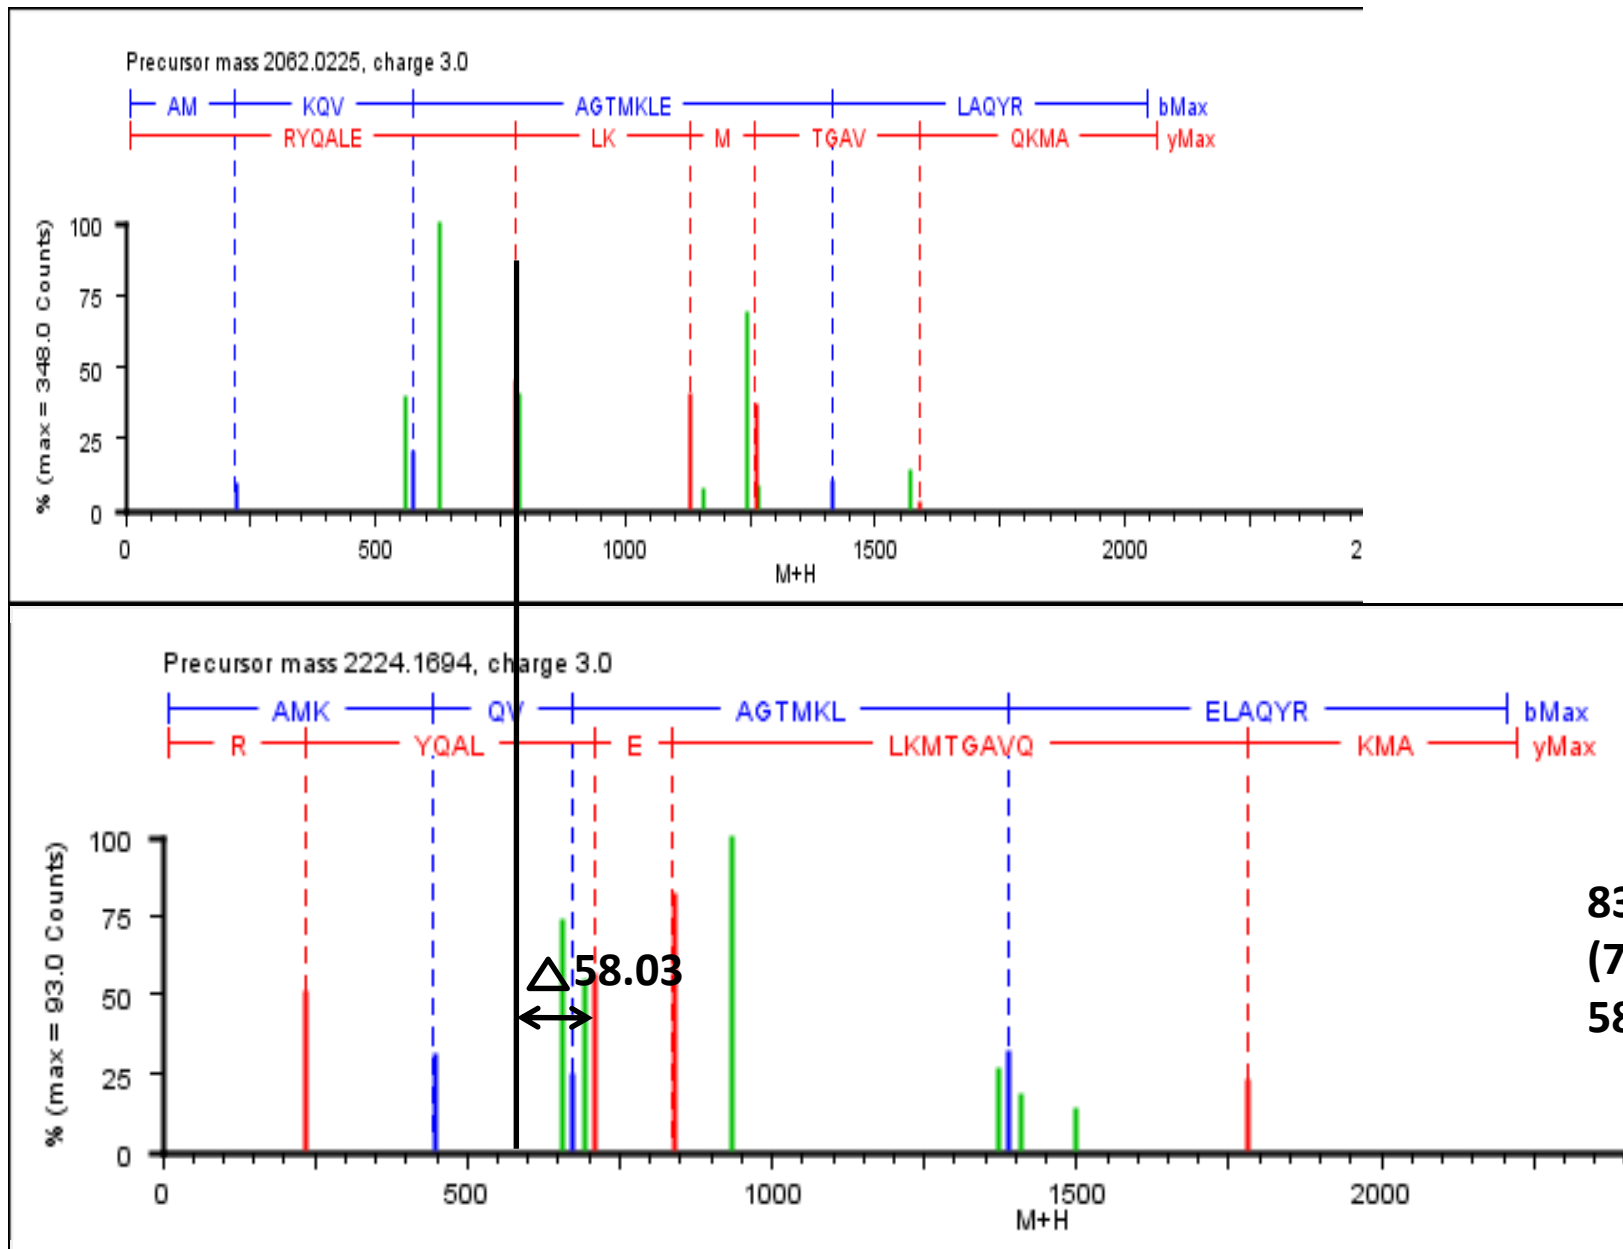

779.33

837.4419:  
(779.33+  
58.03)

831.4121

(R)AMKQVAGTMKLELAQYR(Pento)(E)

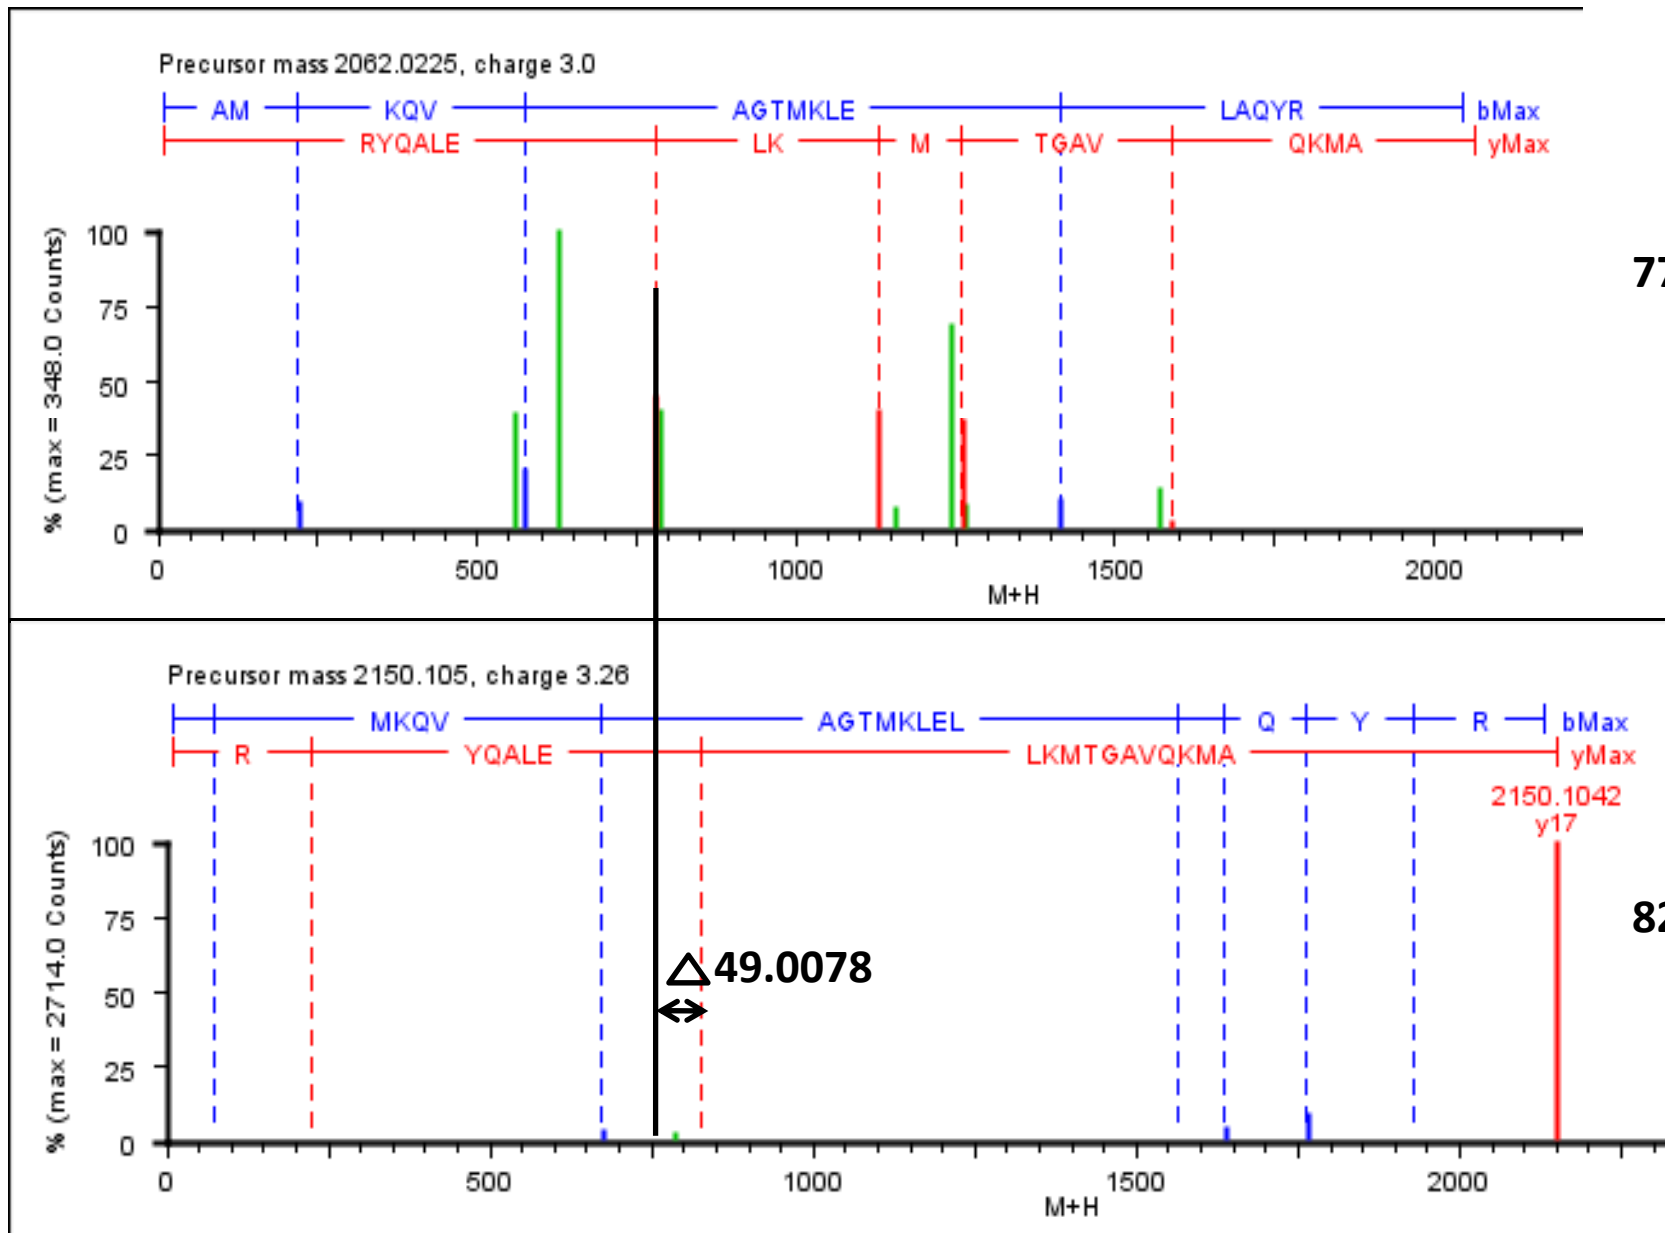

**779.33**

**828.3377**

**425-441**

**(R)AMKQVAGTMKLELAQYR(MOLD)(E)**

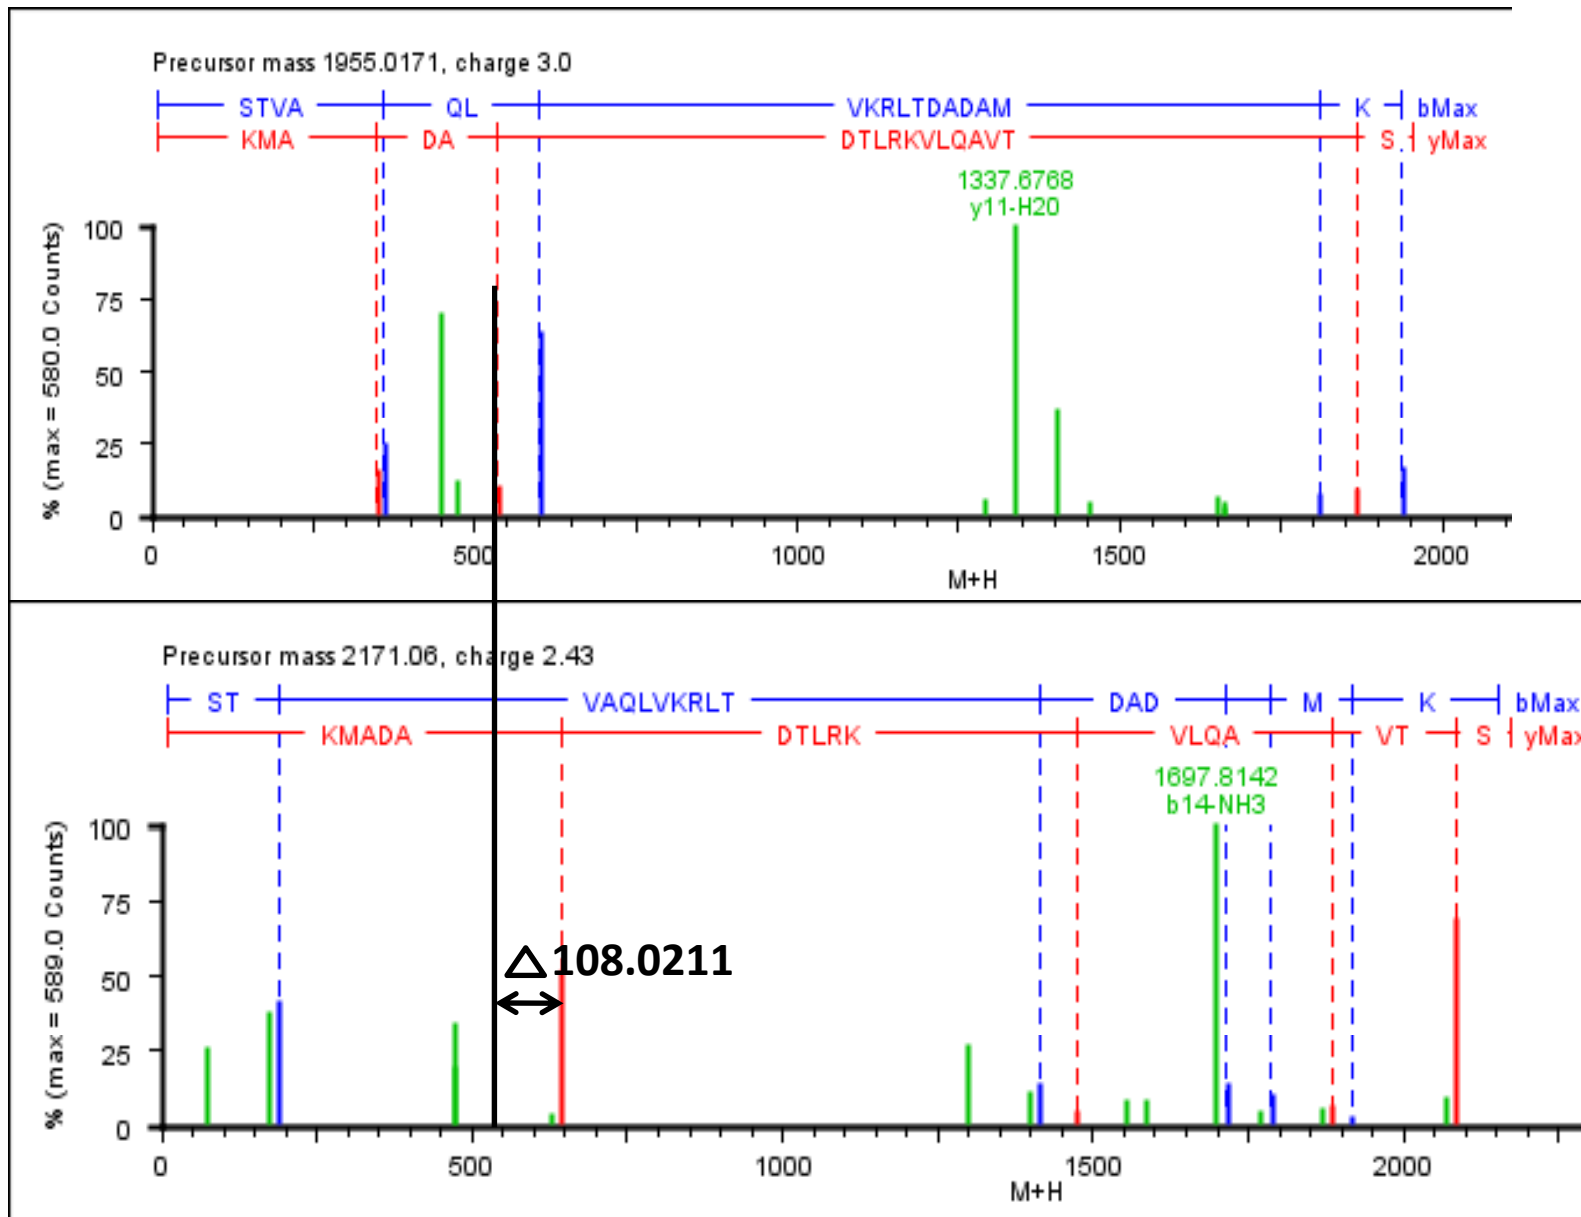

535.2043

643.2515:  
(535.20+  
108.02)

254-270

(R)STVAQLVKRLTDADAMK(Pyr)(Y)

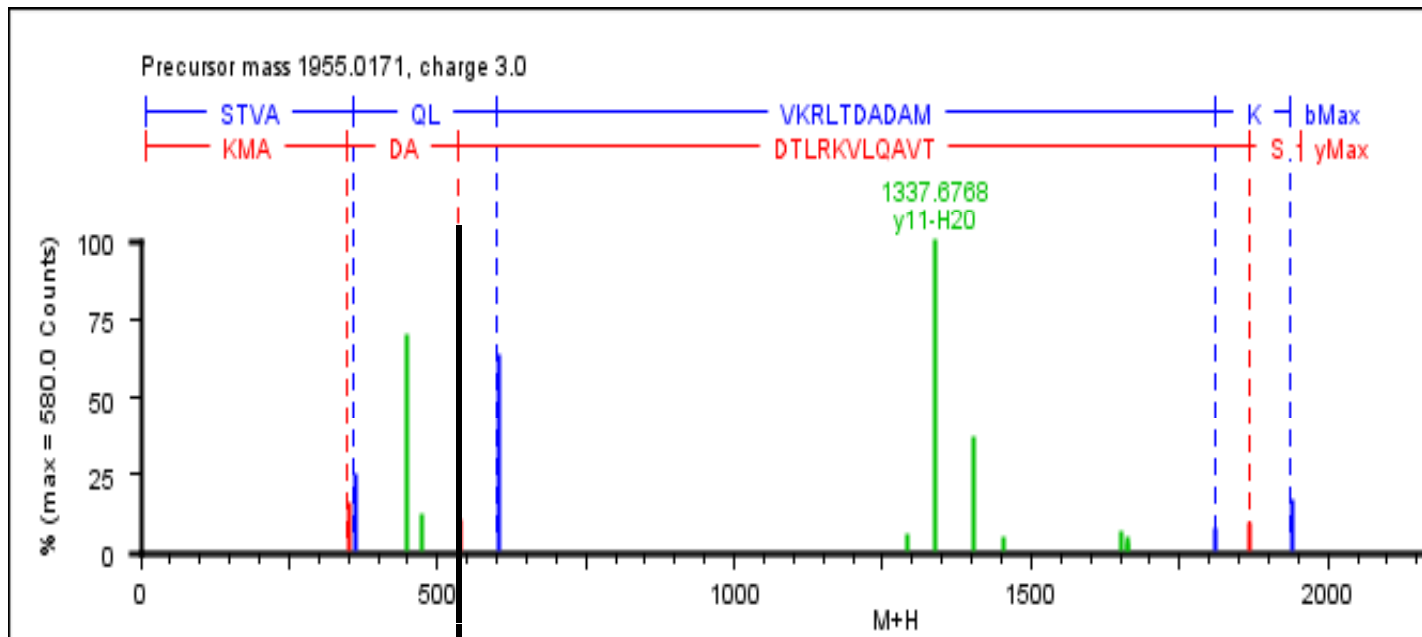

535.2043

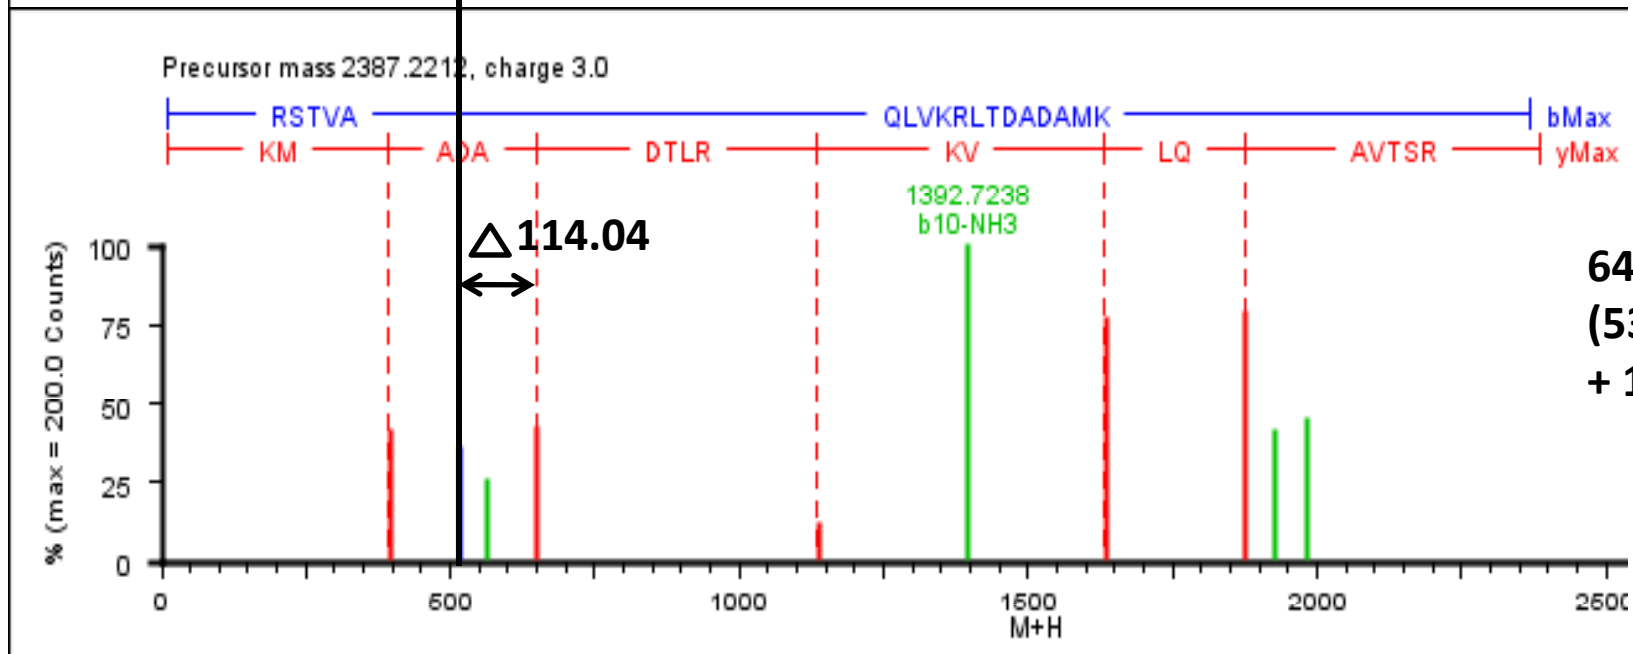

649.2541:  
(535.2043  
+ 114.04)

253-270

(K)RSTVAQLVKRLTDADAMK(Ubi)(Y)

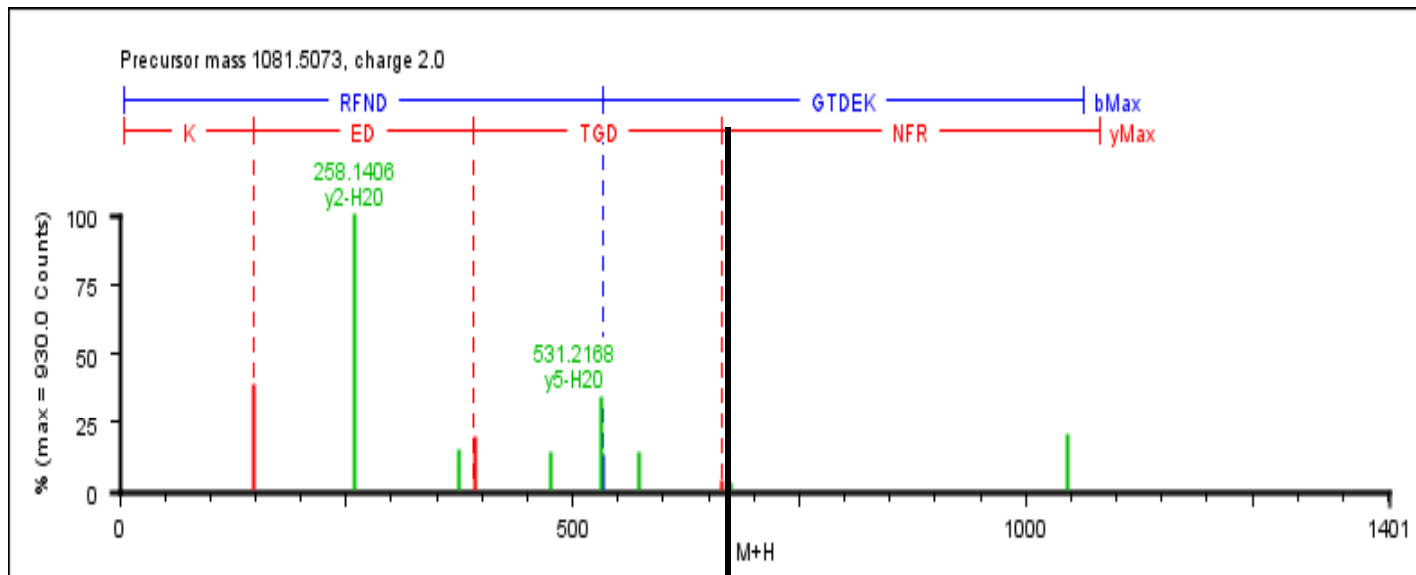

**664.3463**

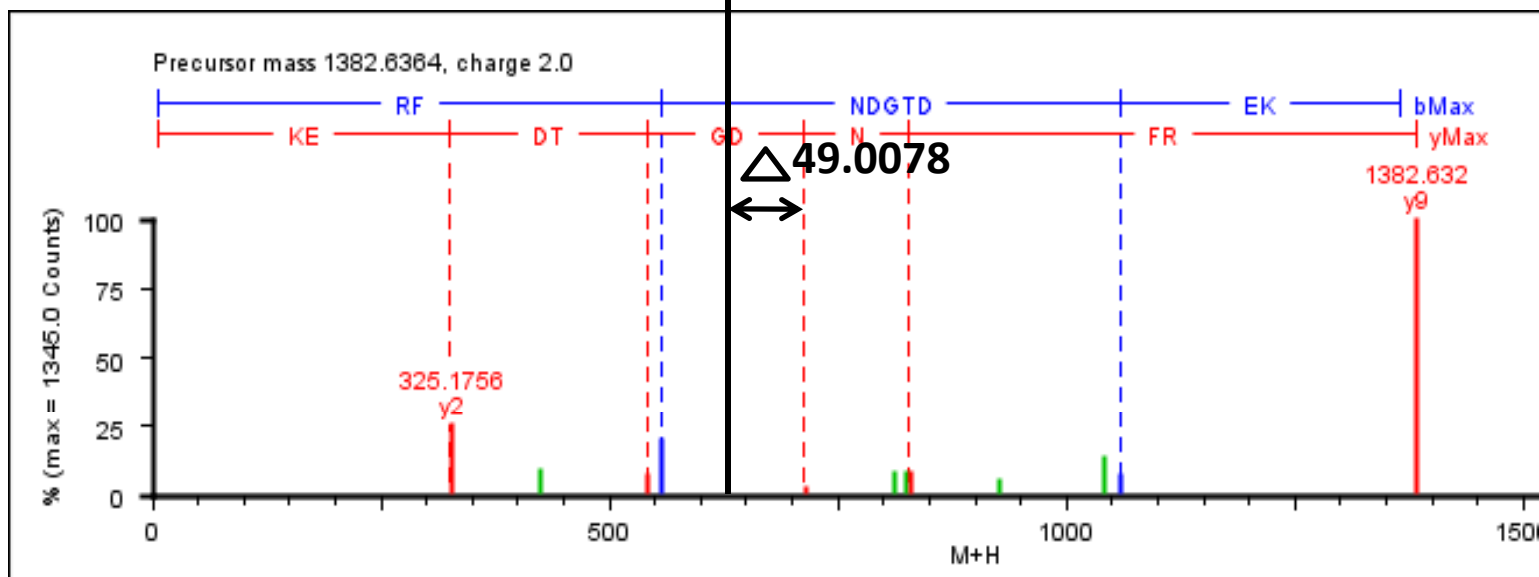

**713.3528:**  
**(664.34+ 49.00)**

**231-239**

**(K)RFNDGTDEK(MOLD)(K)**

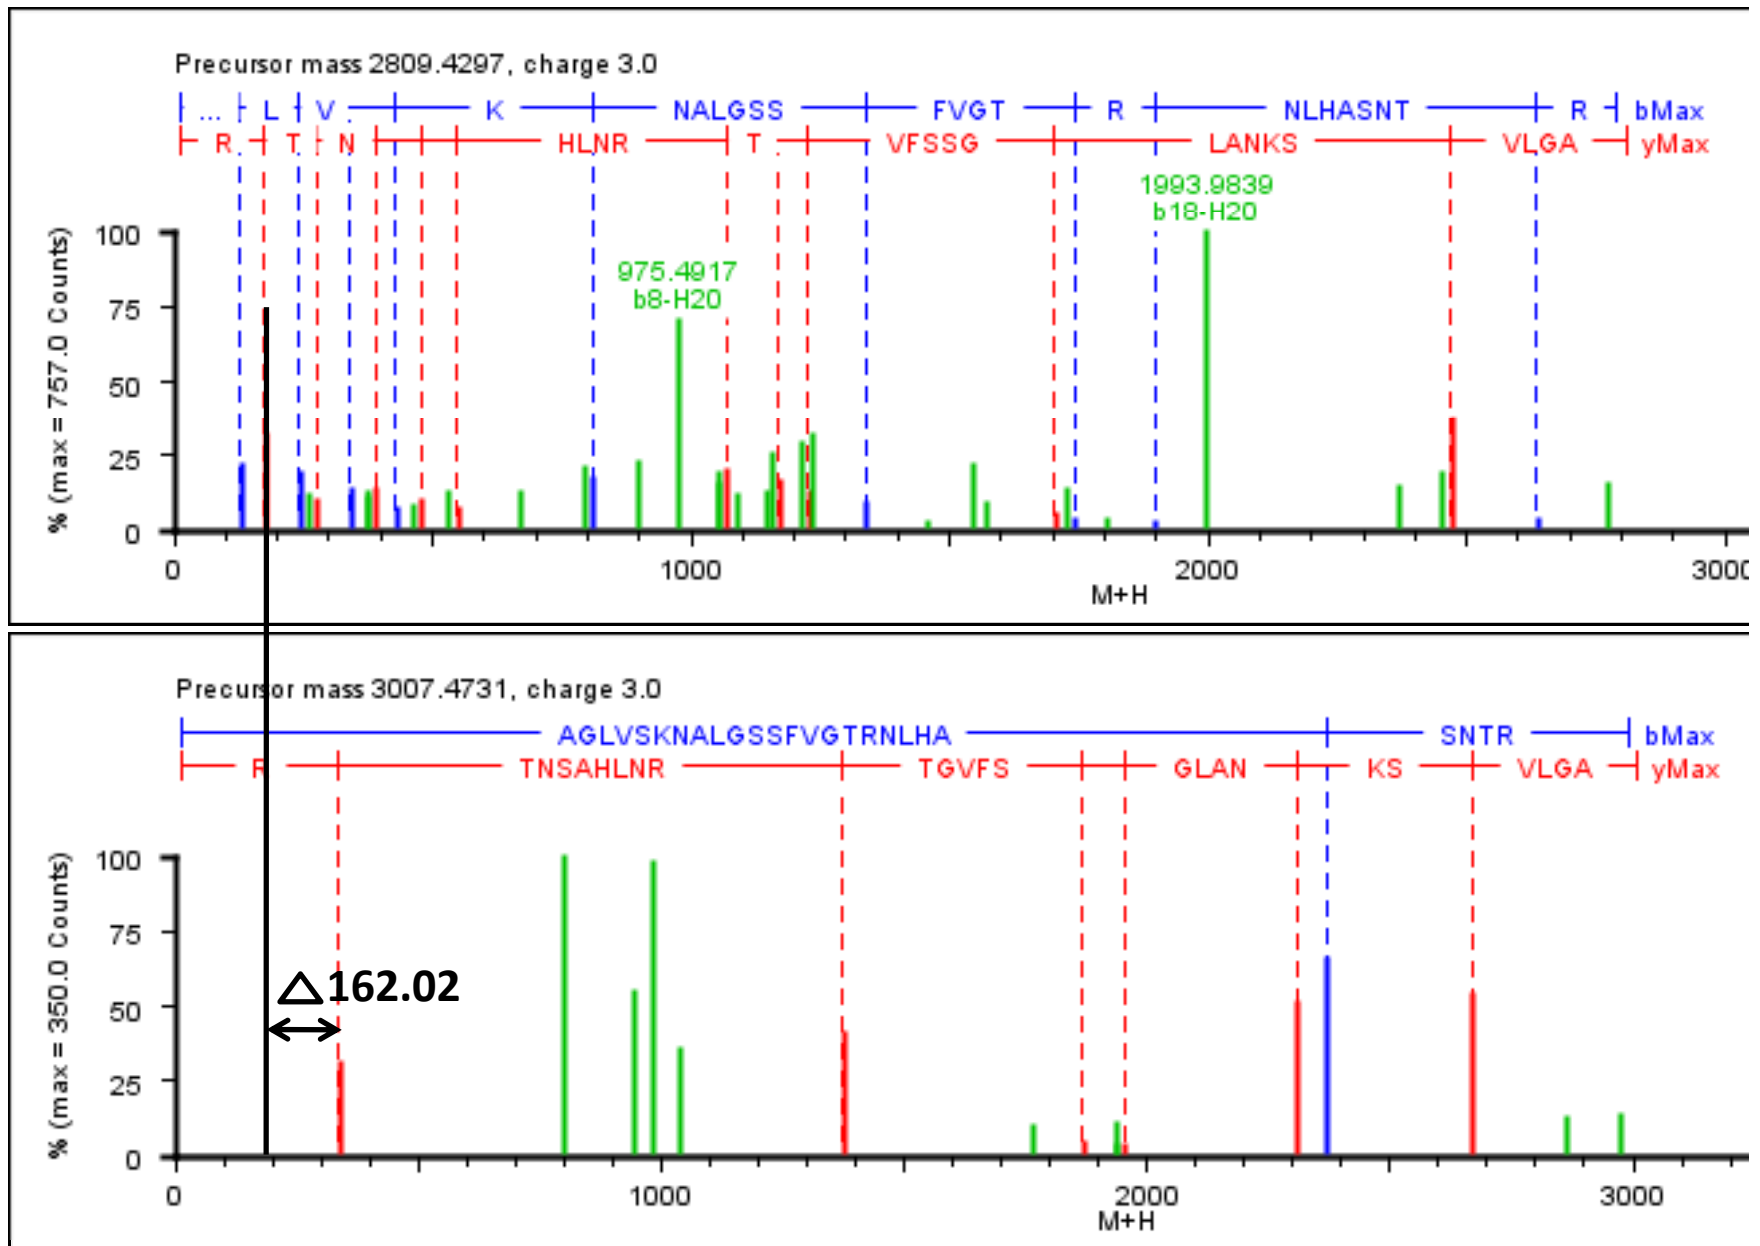

18-42

(R)AGLVSKNALGSSFVGTRNLHASNTR(Gly)(L)

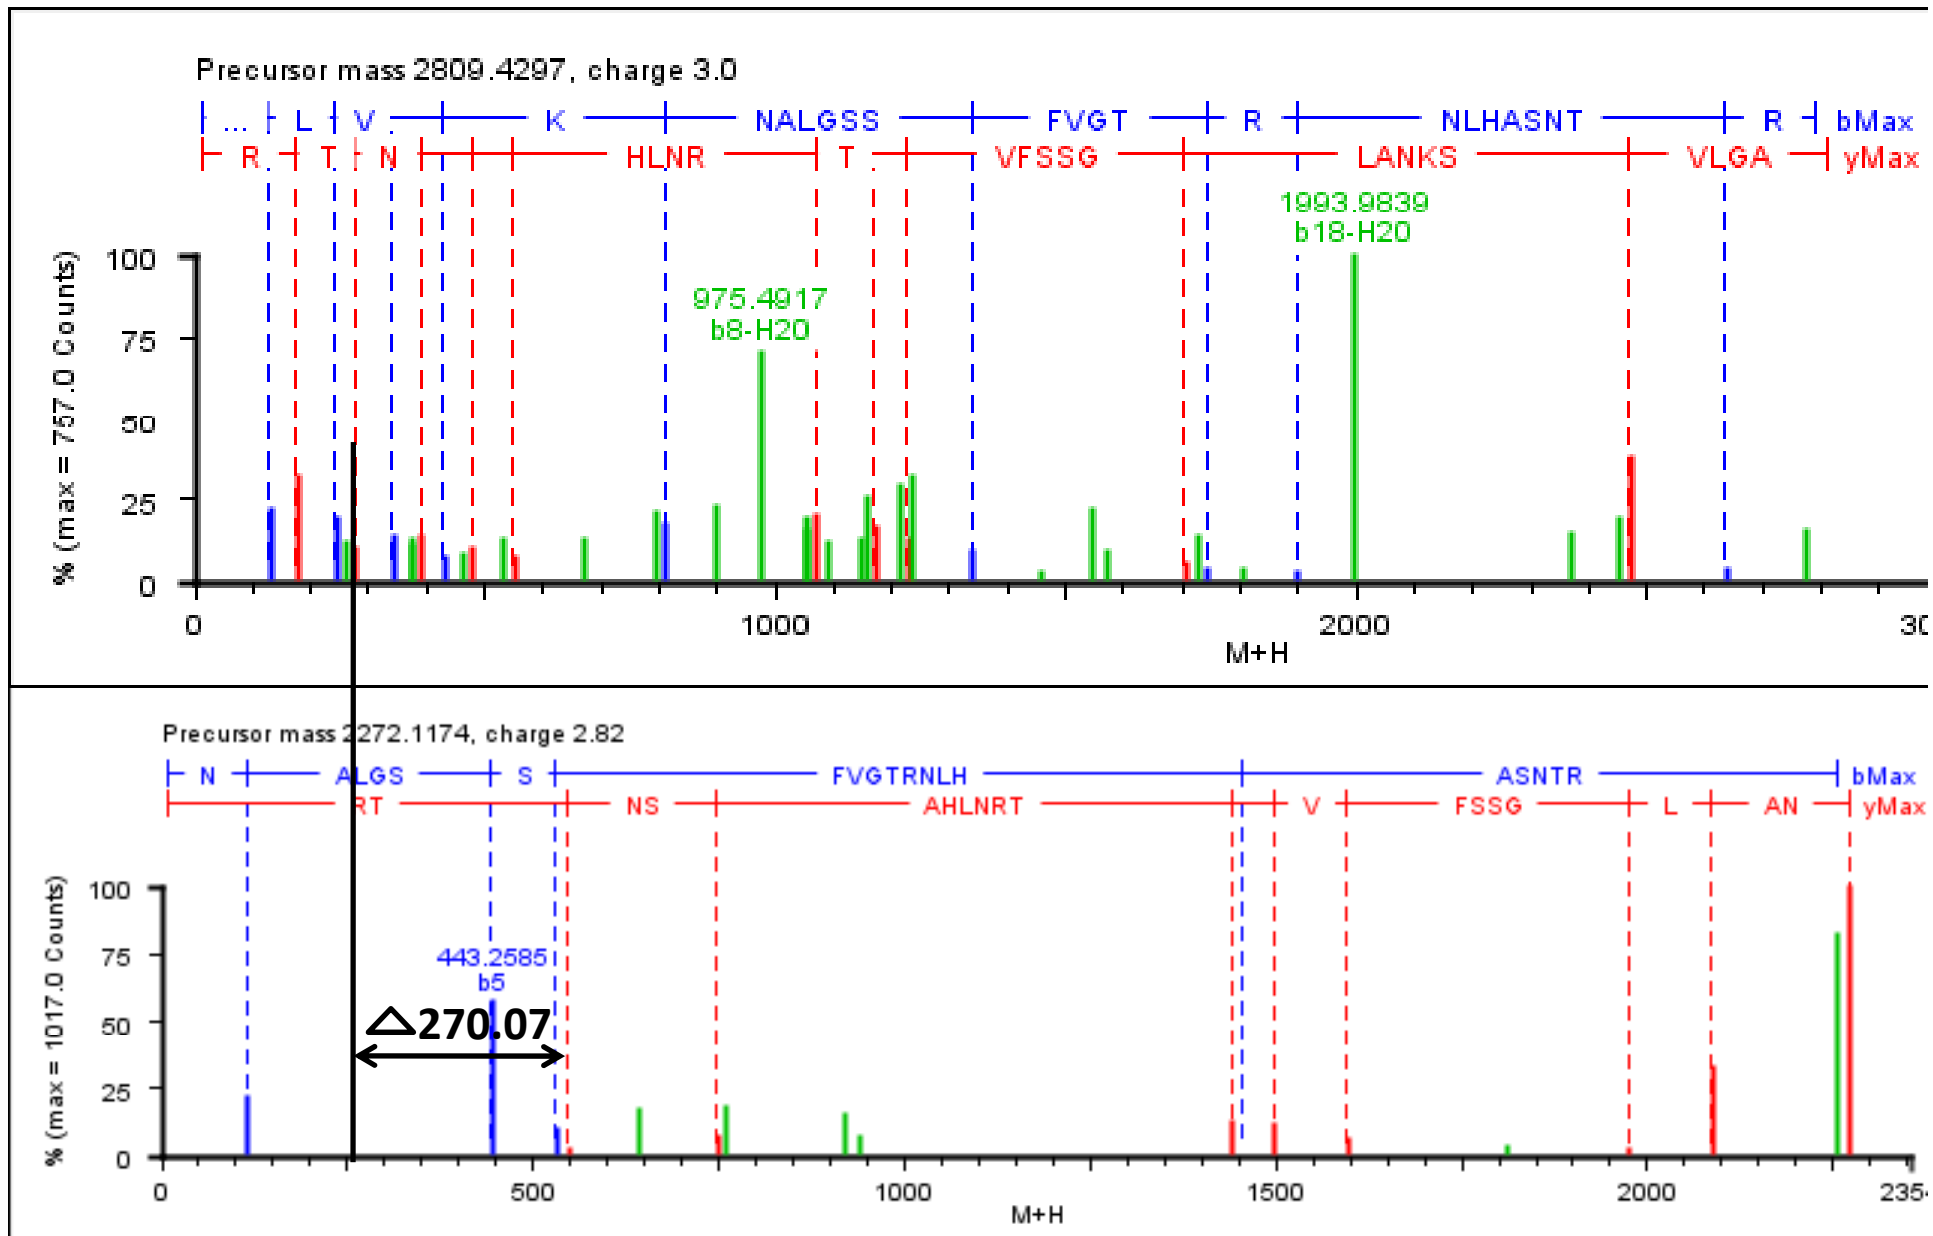

24-42

(K)NALGSSFVGTRNLHASNTR(AFGP)(L)

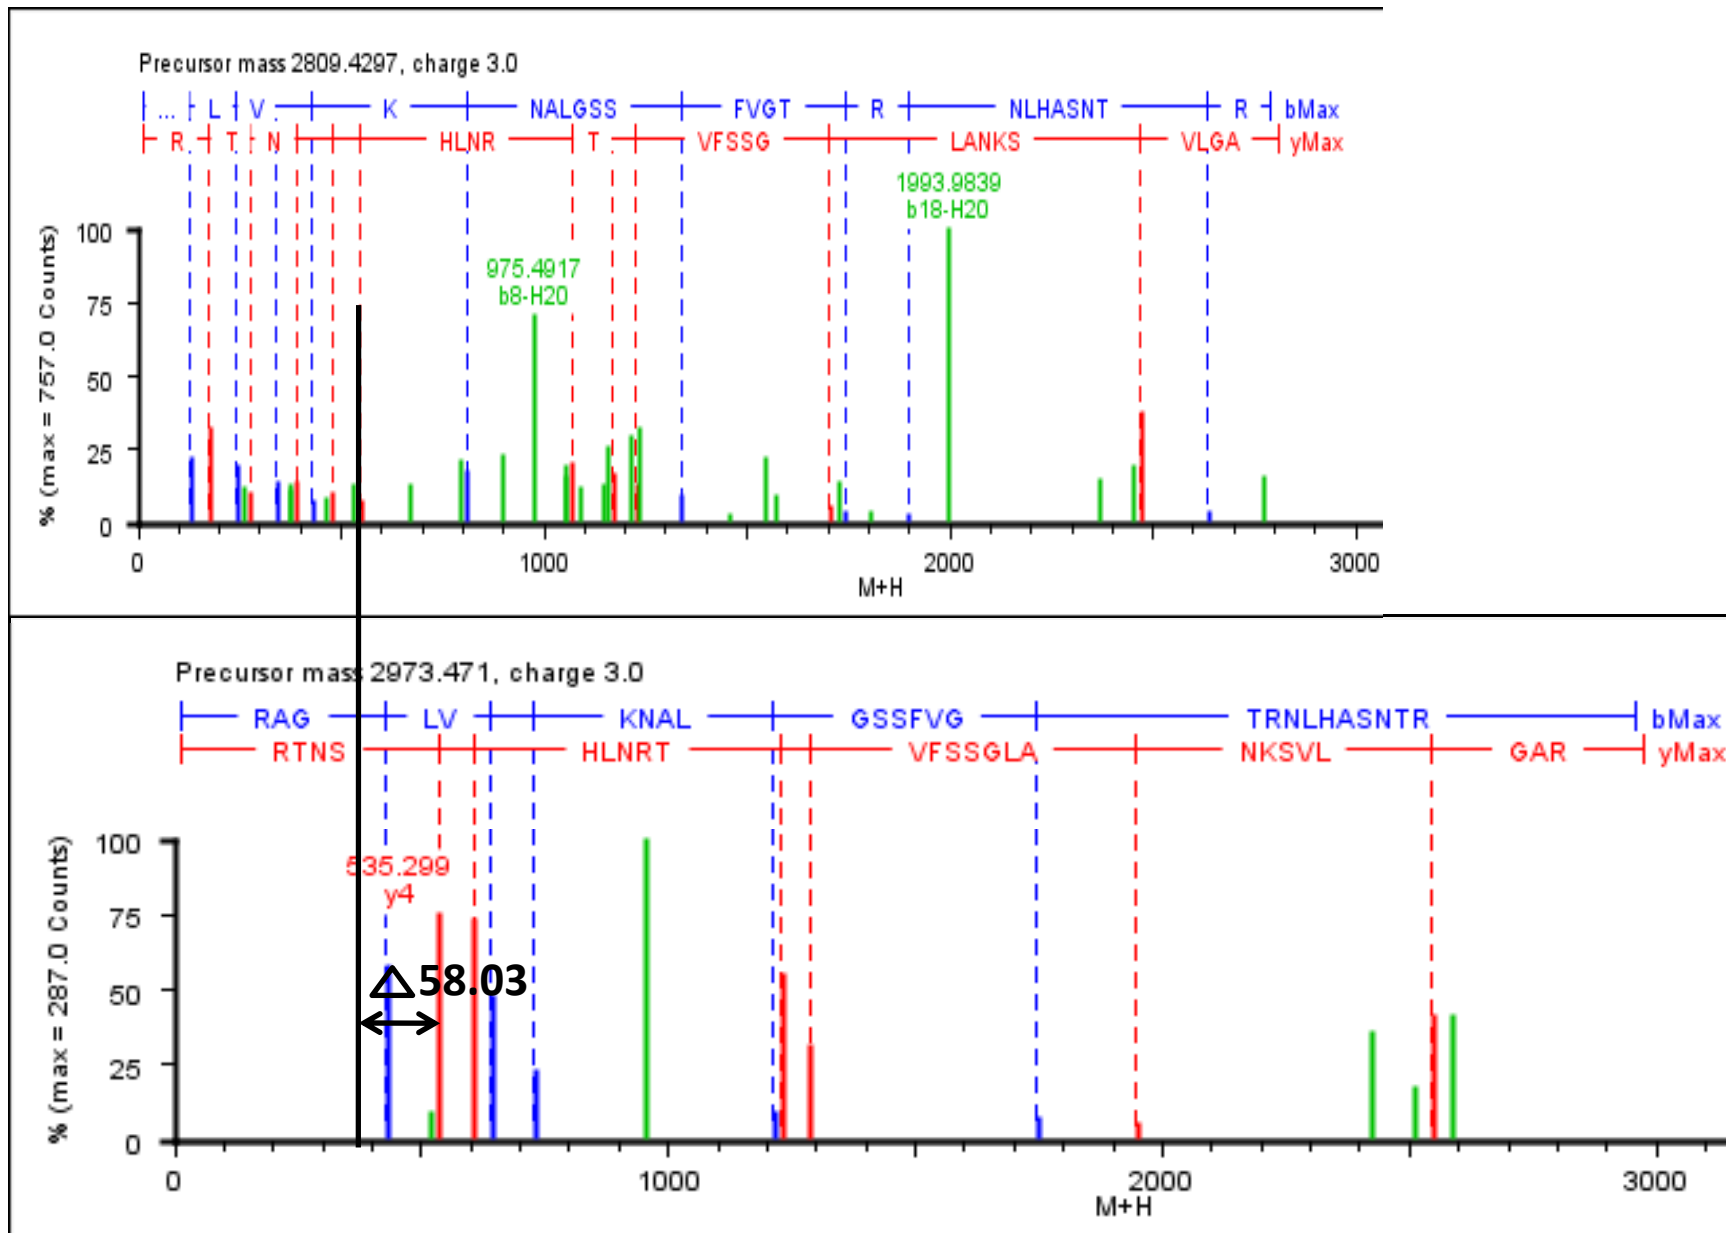

17-42

(R)RAGLVSKNALGSSFVGT**R(Pento)**TRNLHASNTR(L)



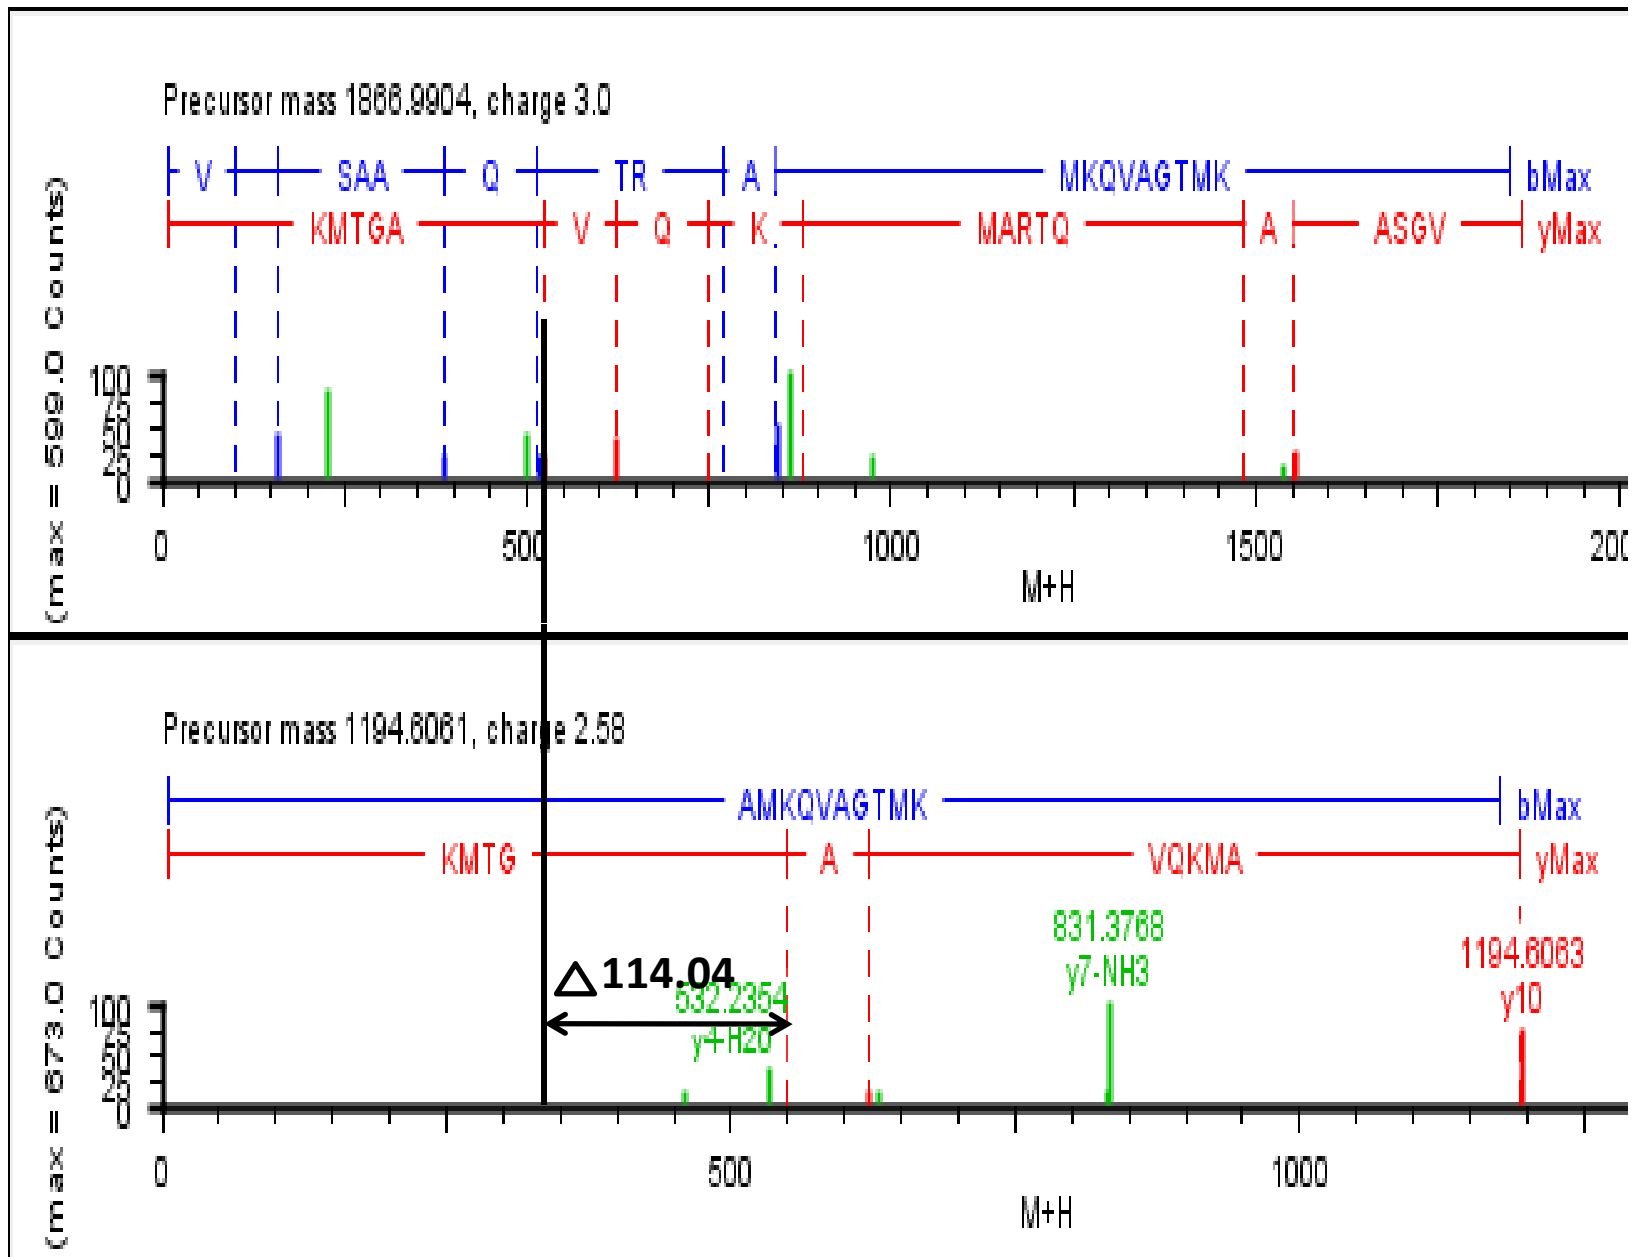

523.2258

621.3326:  
(523.22+  
114.04)

425-434

(R)AMKQVAGTMK(Ubi)(L)

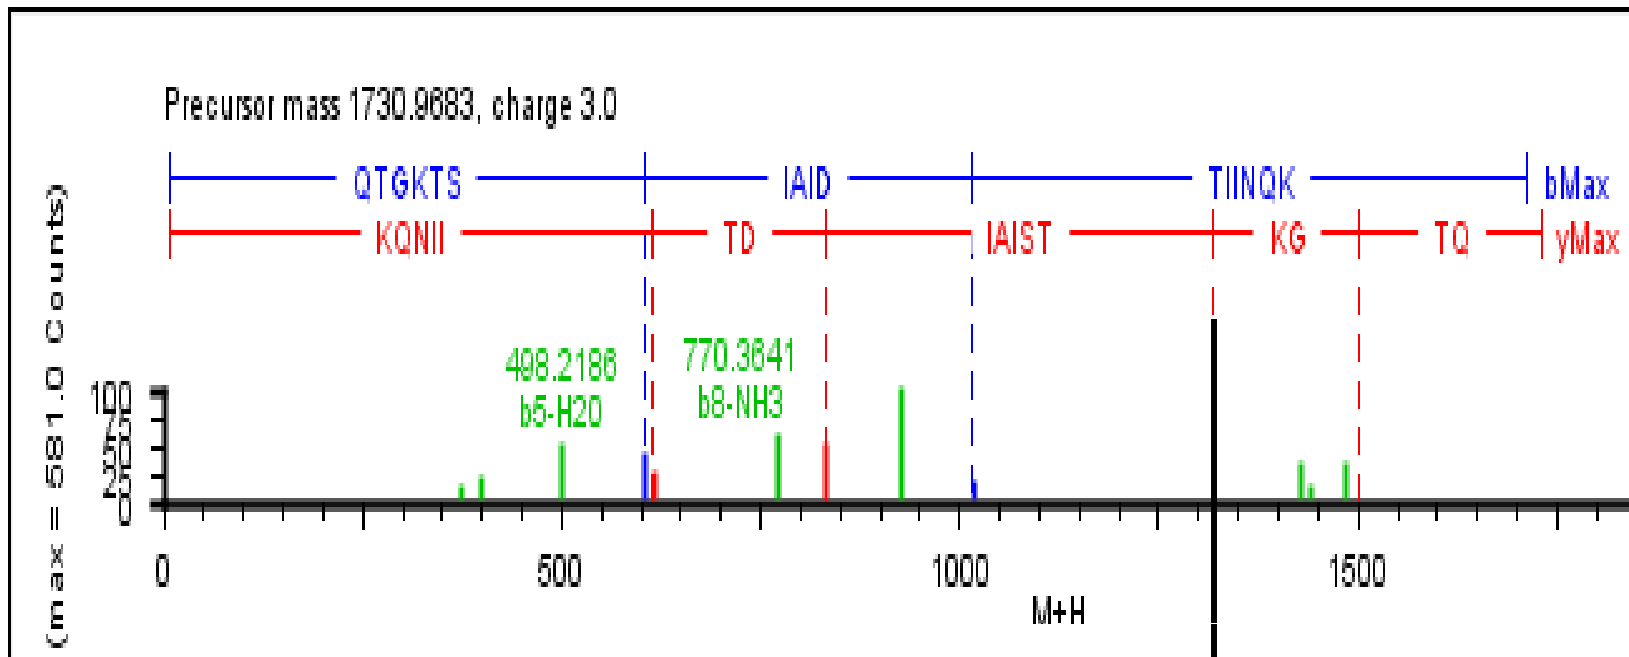

1316.9087

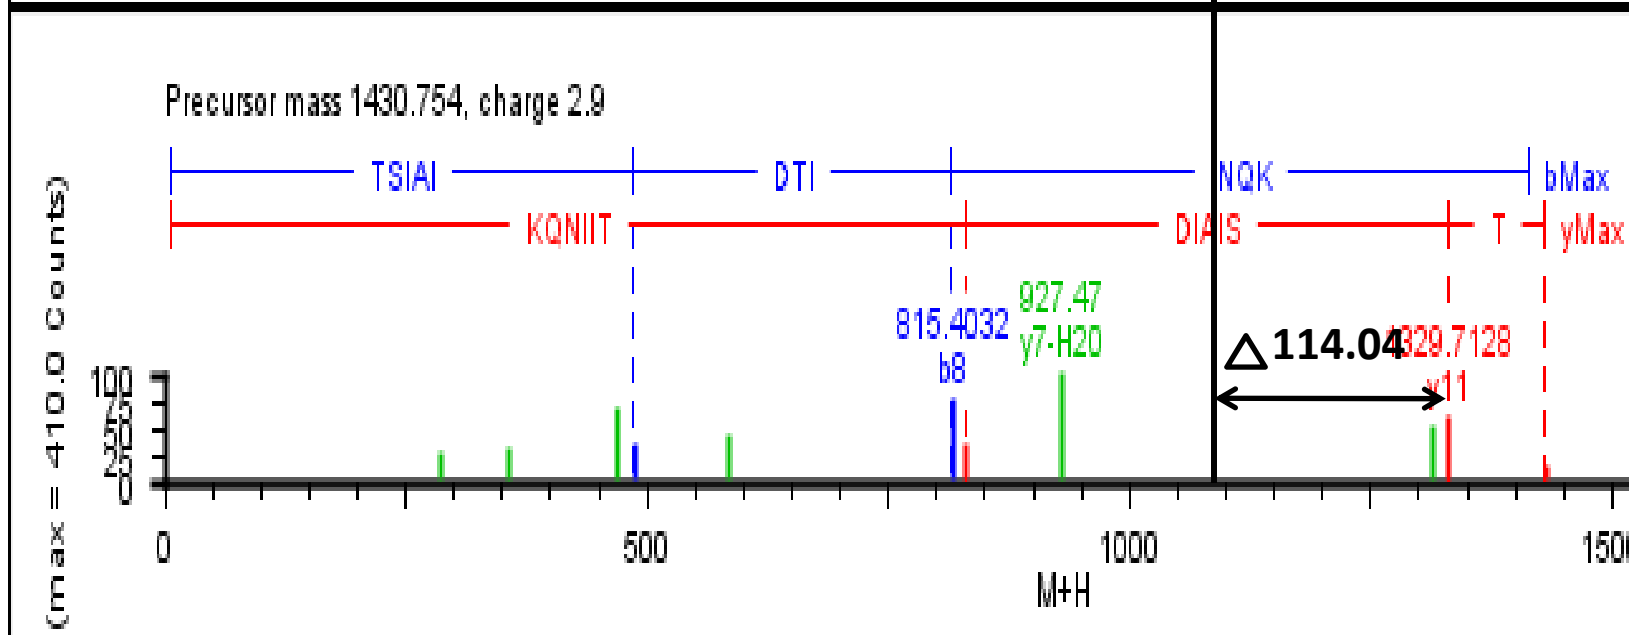

1430.754:  
(1316.90+  
114.04)

219-230

(K)TSIAIDTIINQK(Ubi)(R)

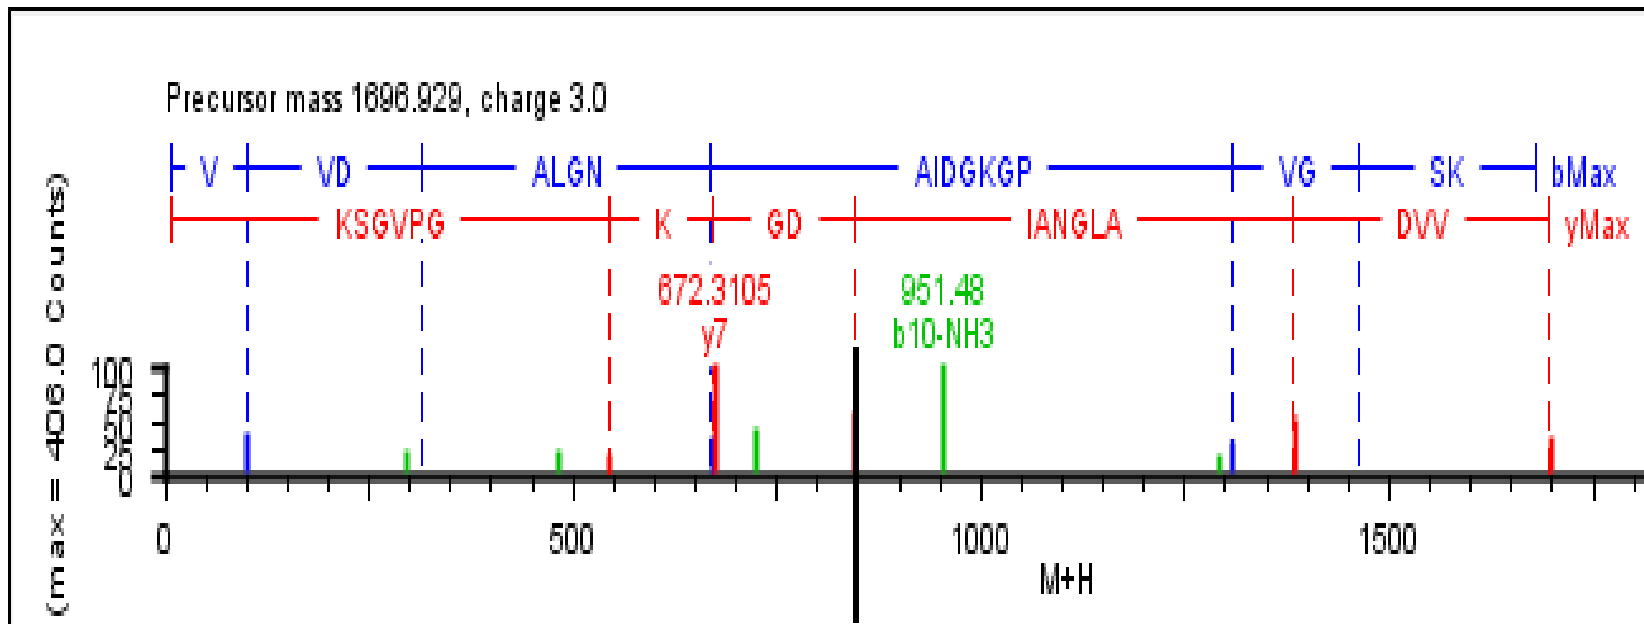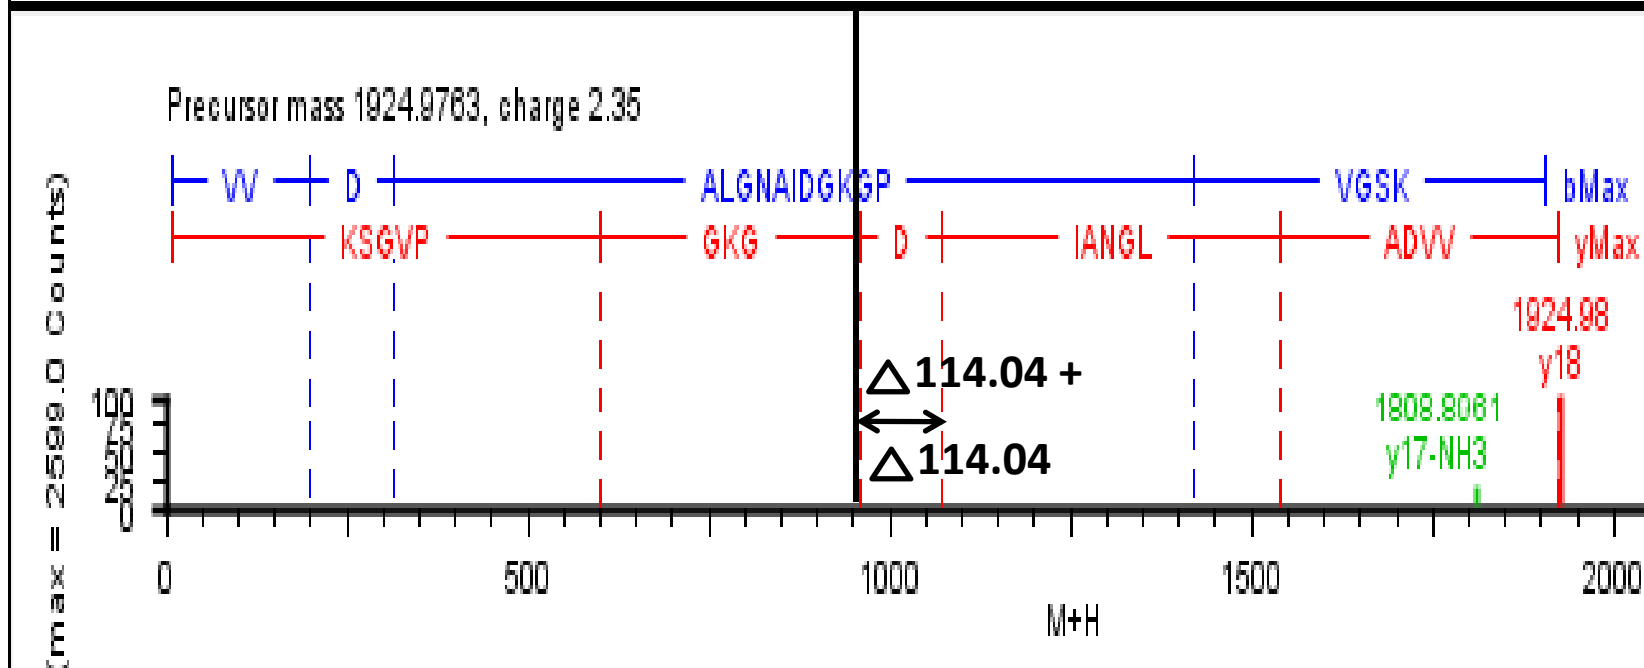

150-167

(R)VVDALGN**K(ubi)**GPV**GK(Ubi)**(I)

ATP beta

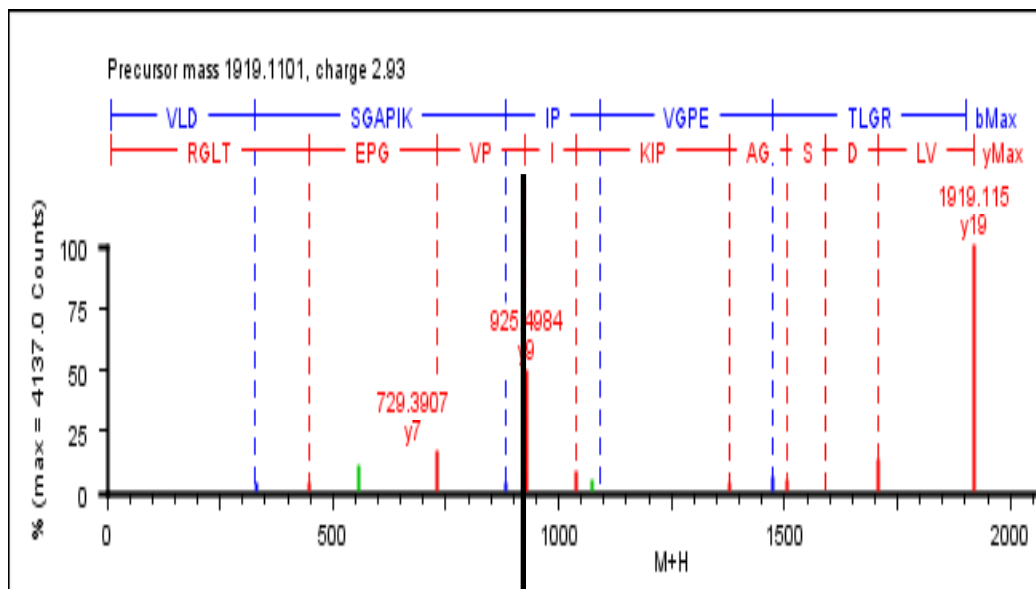

925.4984

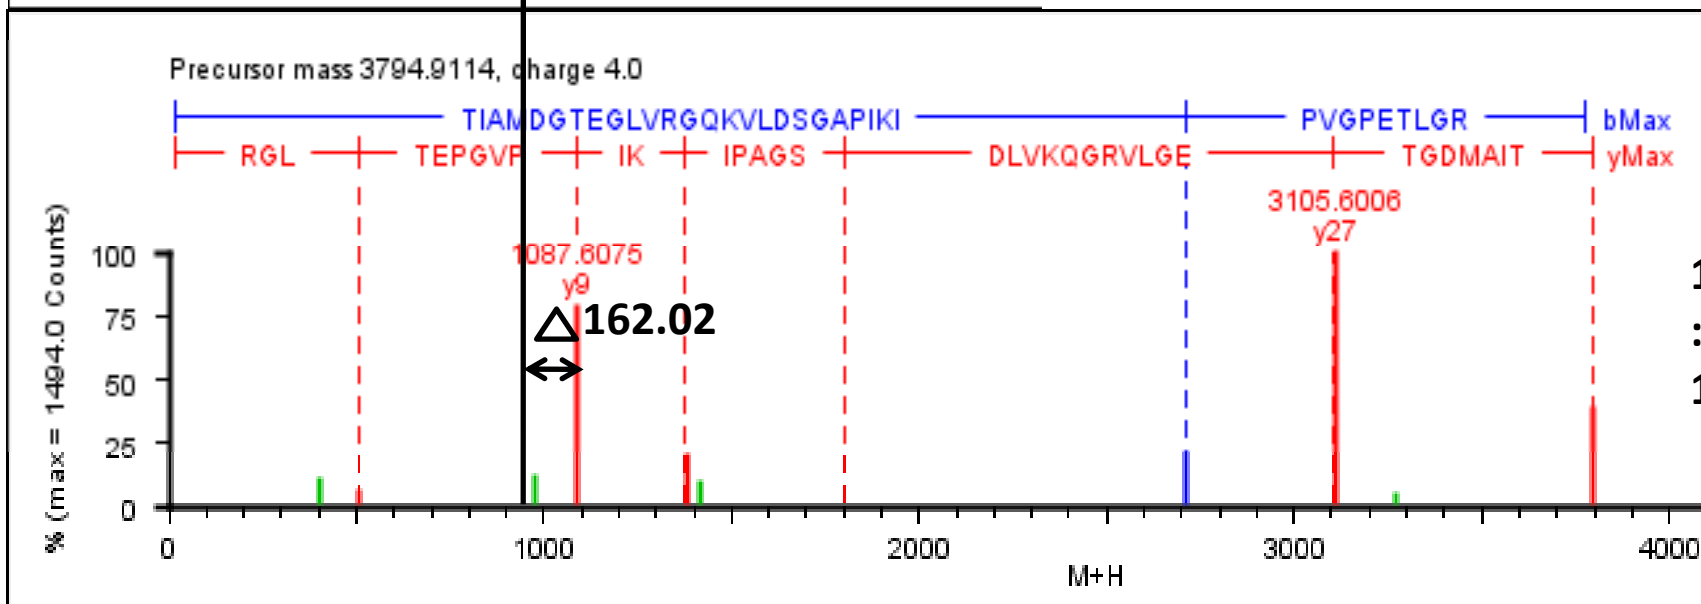

1087.6075  
 : (925.49+  
 162.02)

125-143

(R)TIAMDGTEGLVRGQKVLDSGAPIKIPVGPETLGR(Gly)(I)

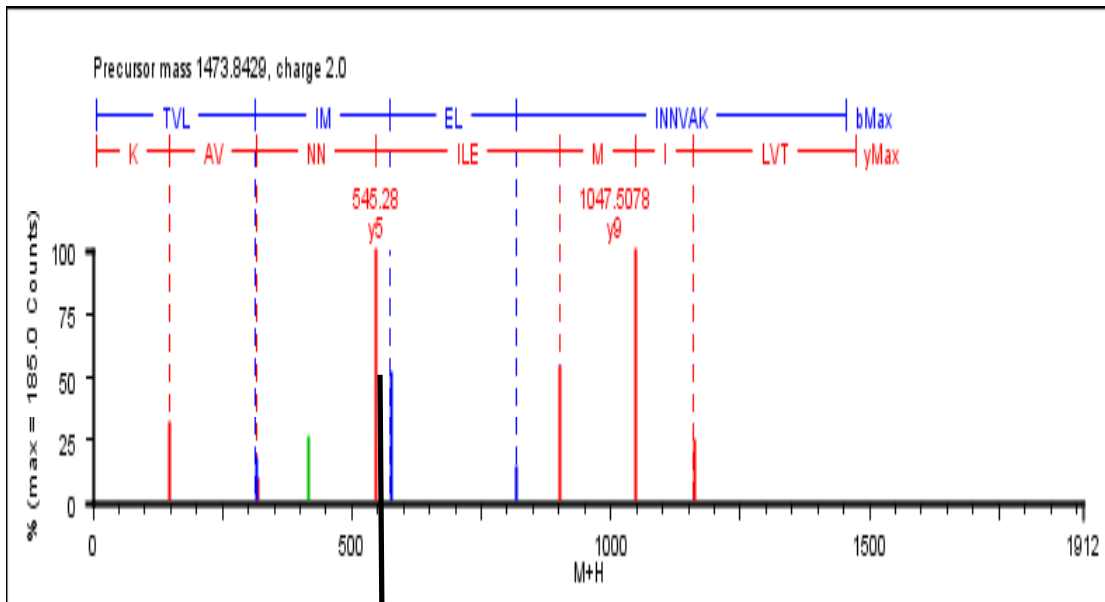

545.28

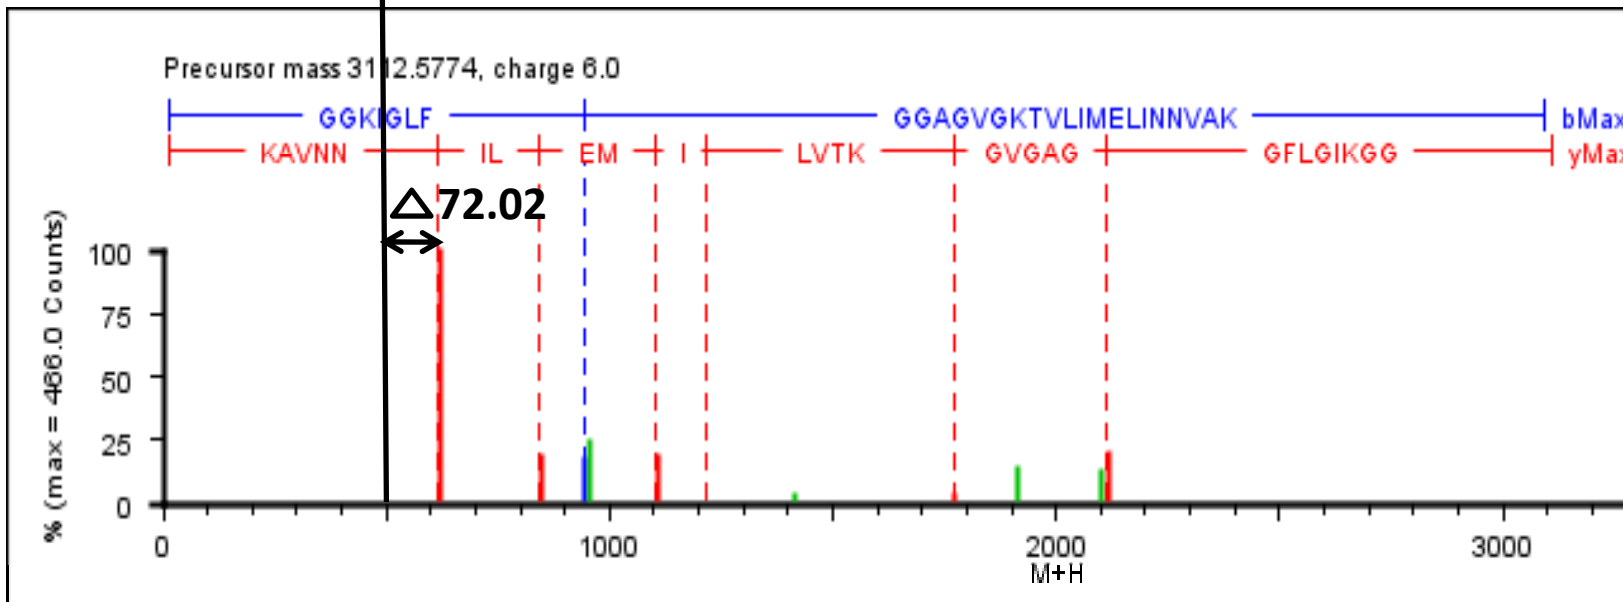

617.3039:  
(545.28+  
72.02)

213-225

(K)TVLIMELINNVAK(CEL)(A)

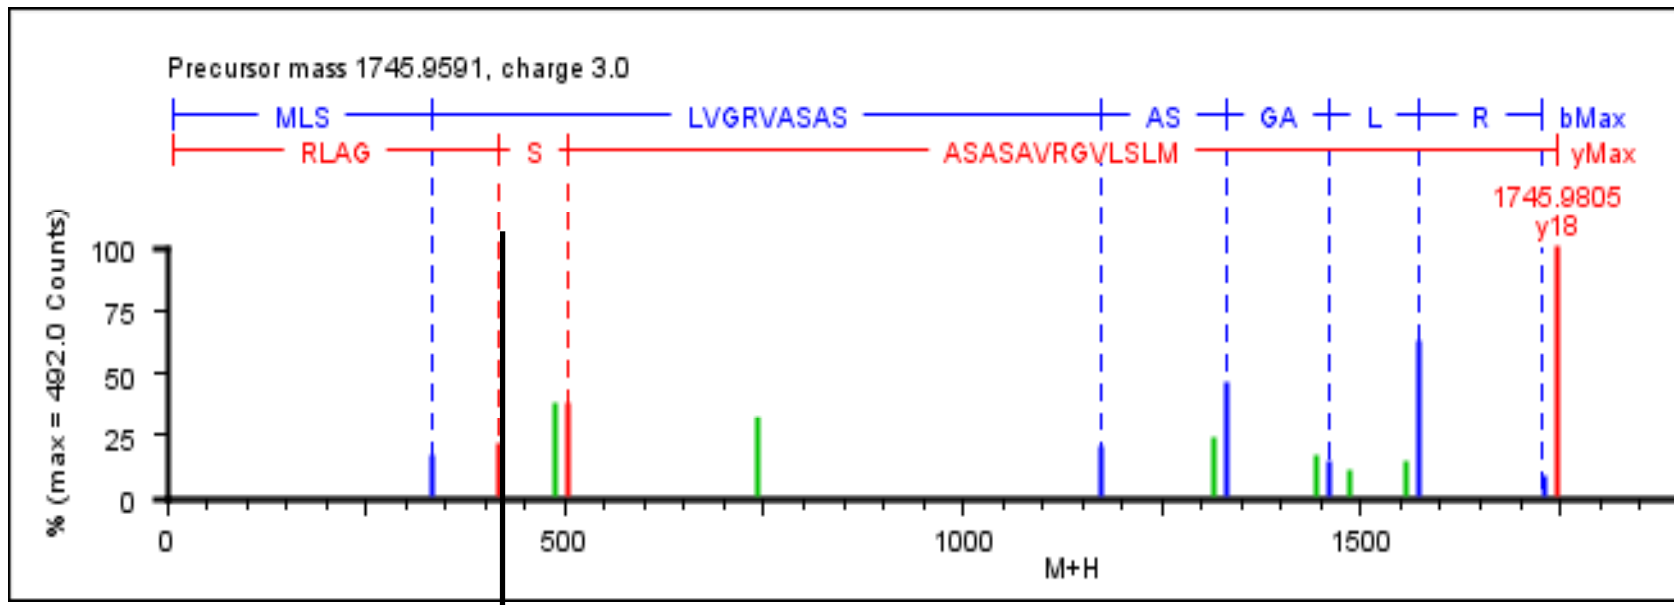

**416.2748**

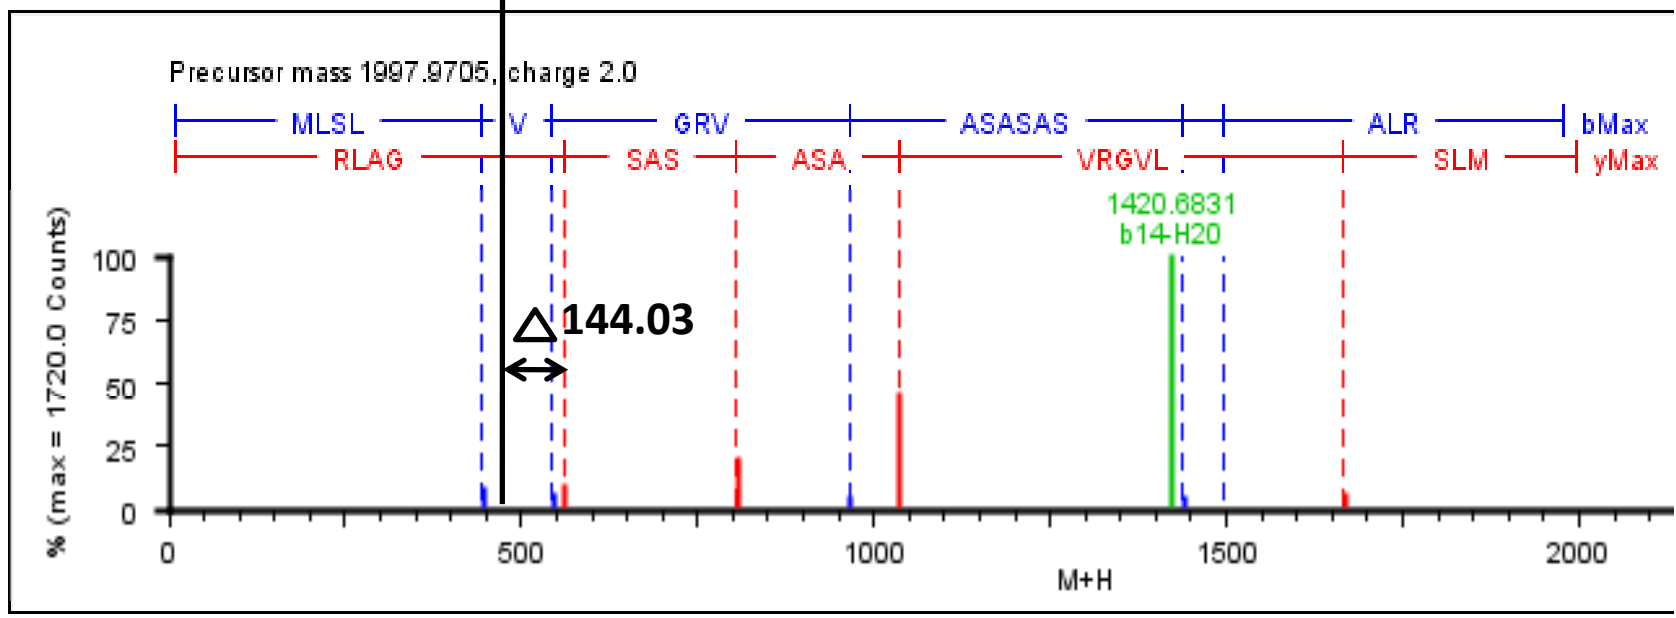

**560.264:**  
**(416.2748**  
**+ 144.03)**

**1-18**

**(-)MLSLVGRVASASGALR(ImiA)(G)**

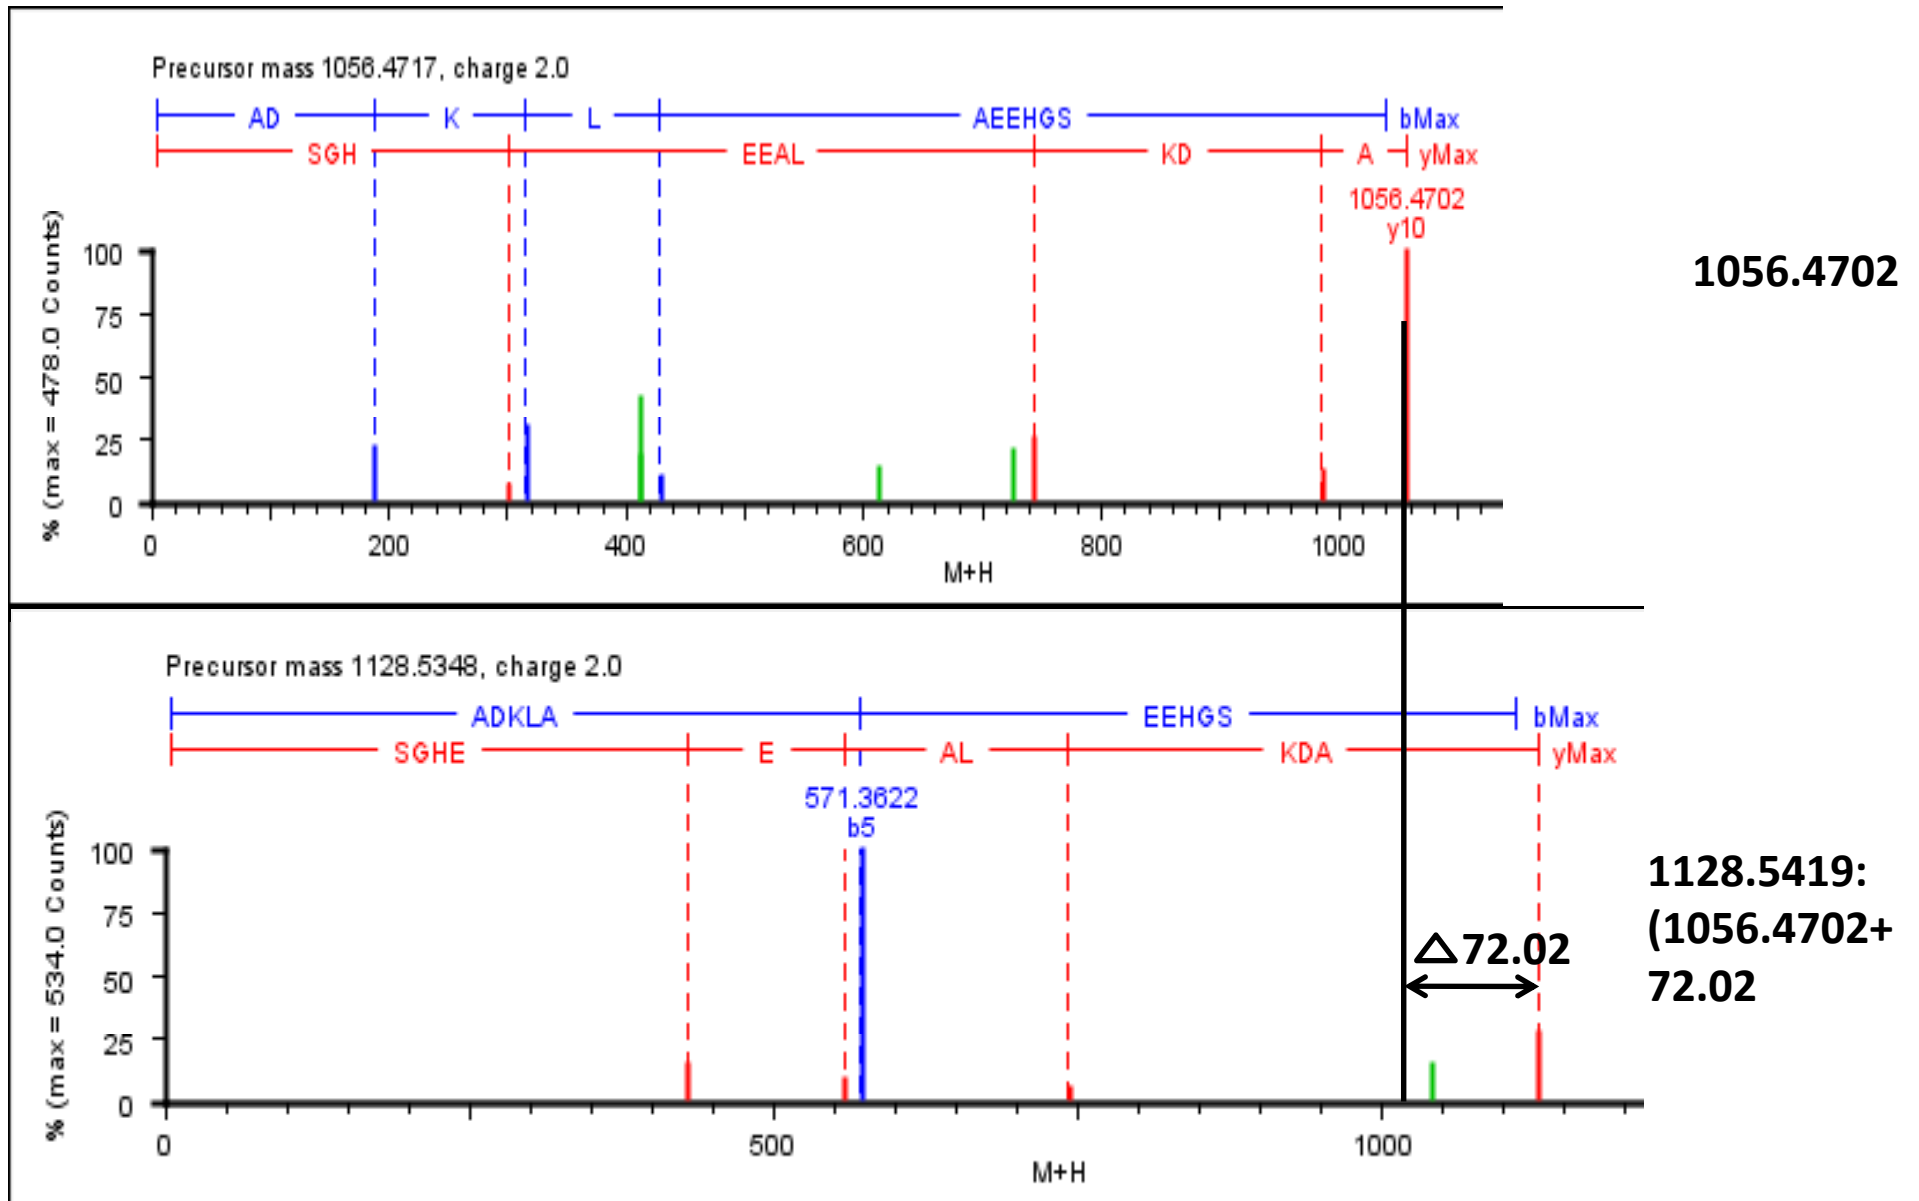

520-529

(K)ADK(CEL)LAEEHGS(-)



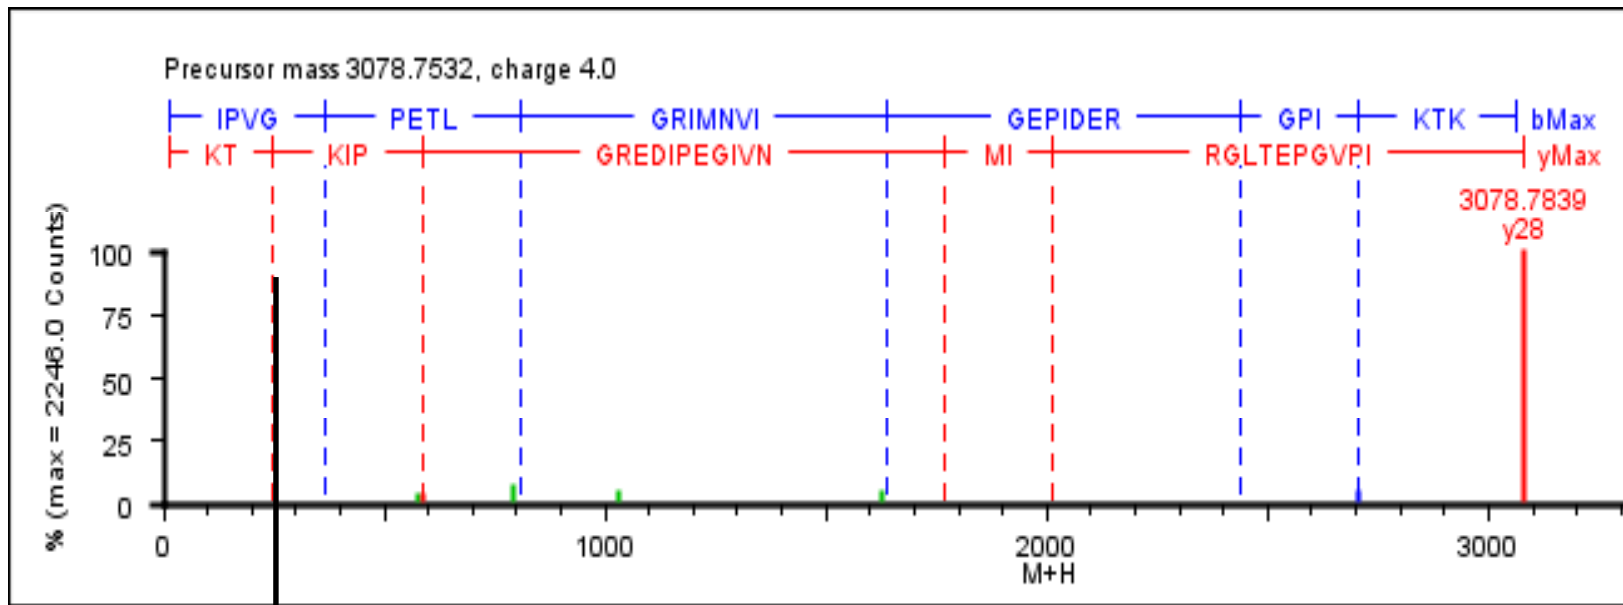

248.1532

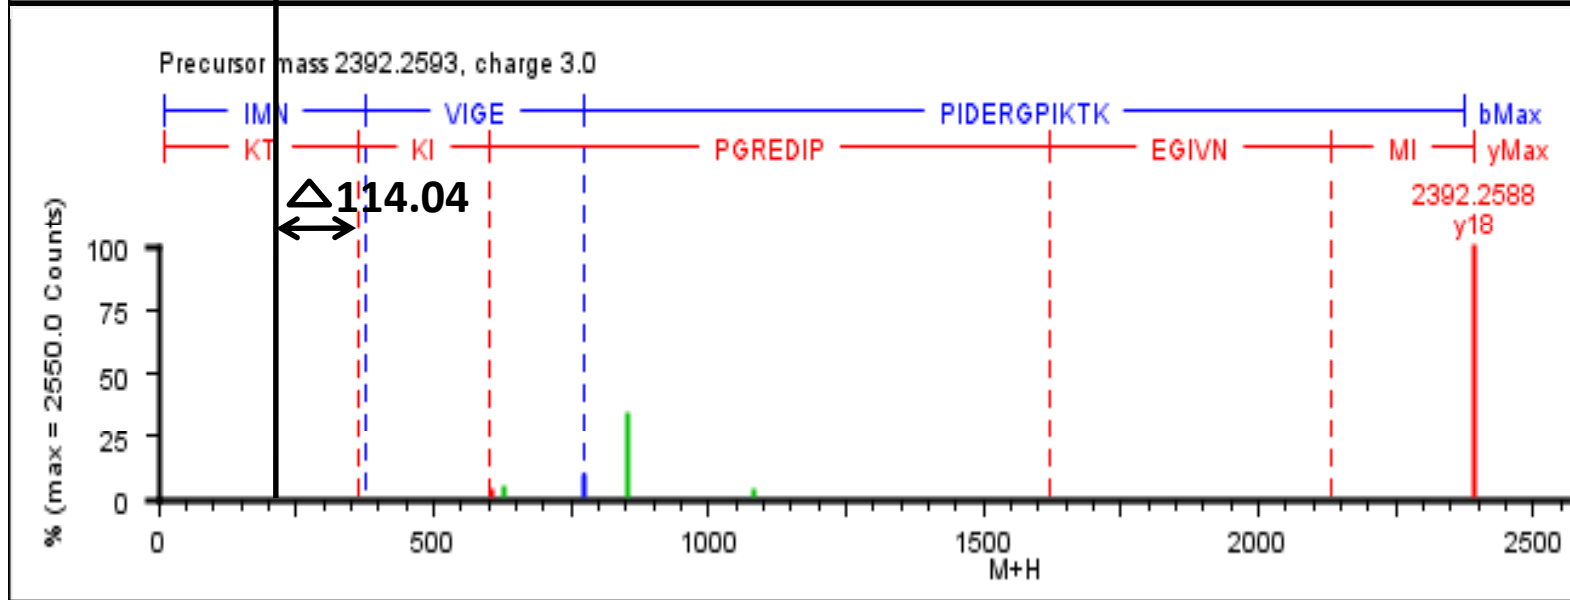

362.2053:  
(248.15+  
114.04)

134-161

(R)IMNVIGEPIDERGPIKTK(Ubi)(Q)

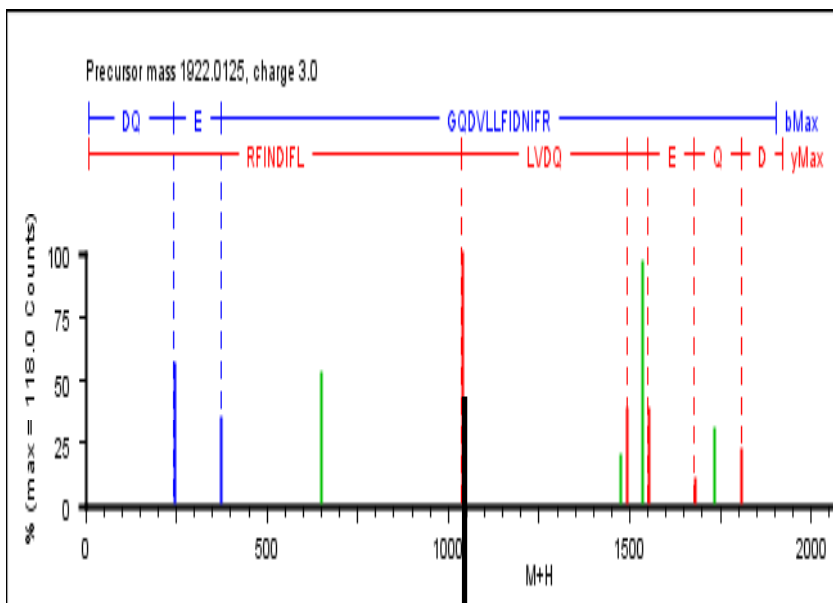

1037.5018

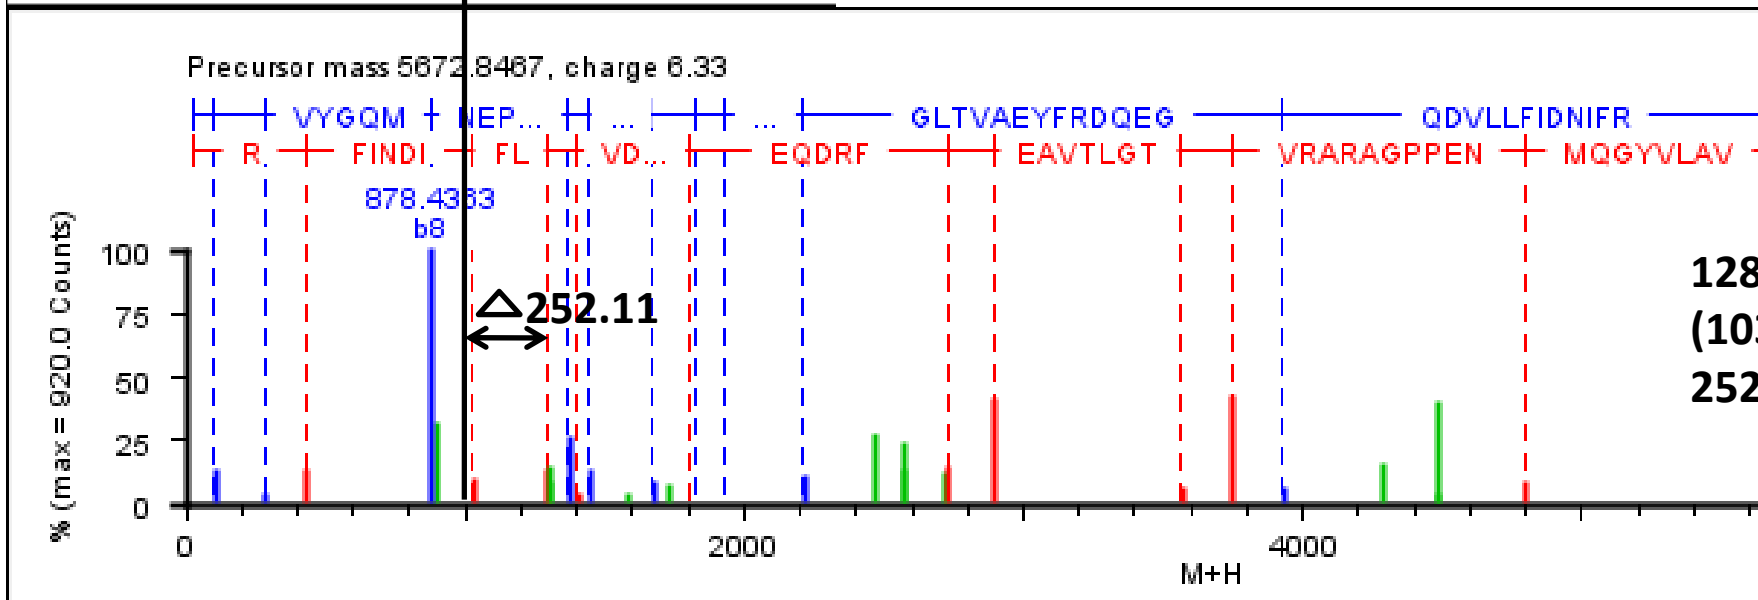

1289.6475:  
(1037.50+  
252.11)

265-310 (K)VALVYGQMNPPGARARVALTGLTVAEYFRDQEGQDVLLFIDNIFR(Crossline)(F)

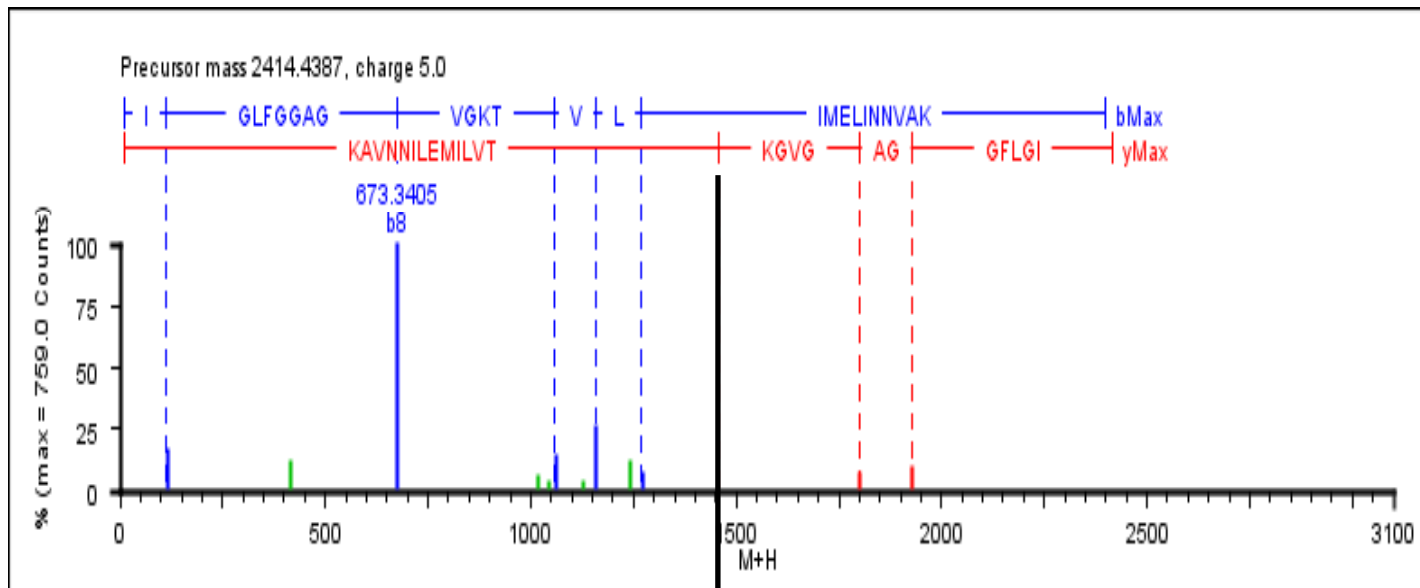

1457.8594

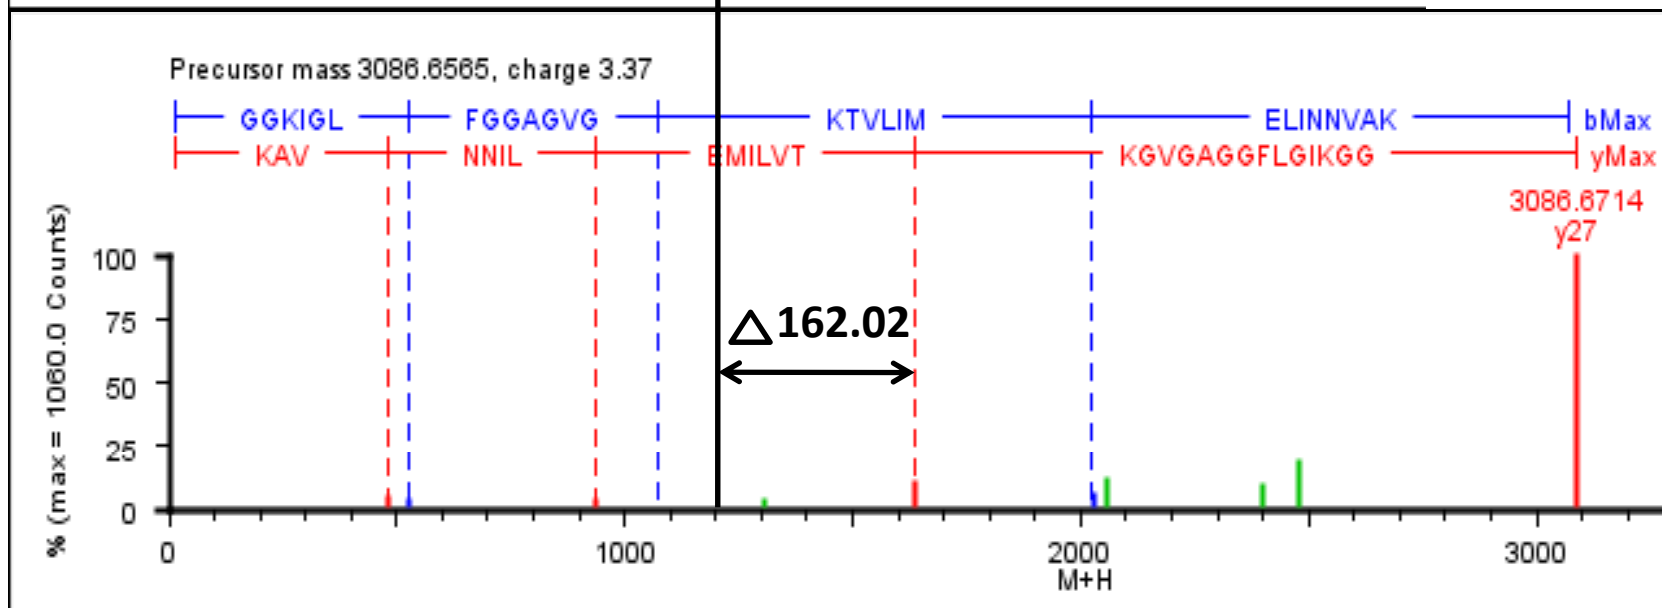

1635.78:  
(1457.85+  
162.02)

202-225

(K)IGLFGGAGVGKTVLIMELINNVAK(Gly)(A)

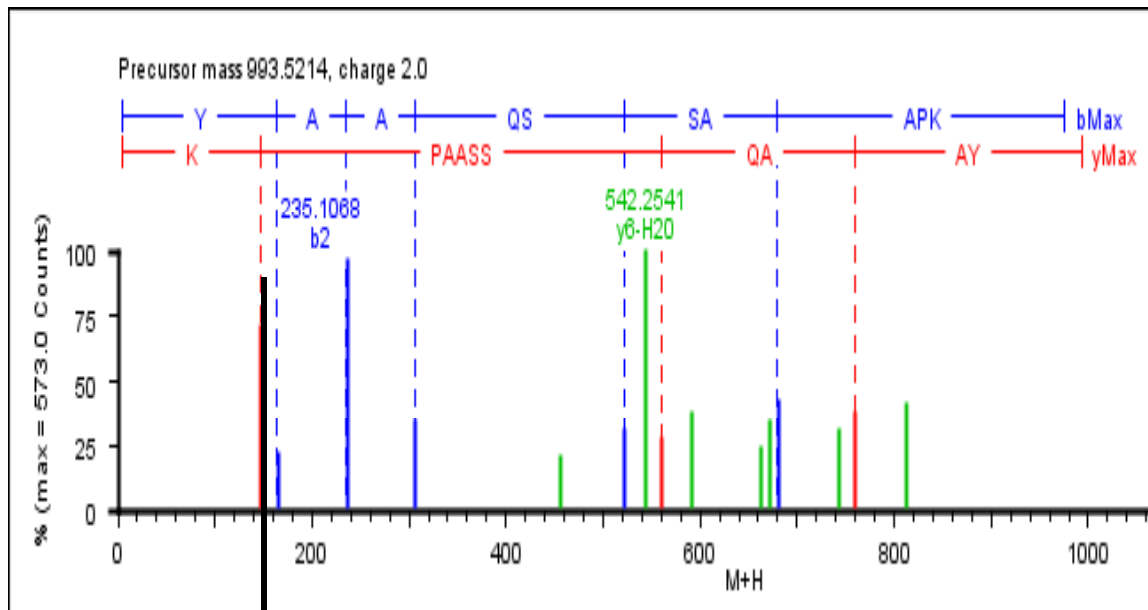

147.1094

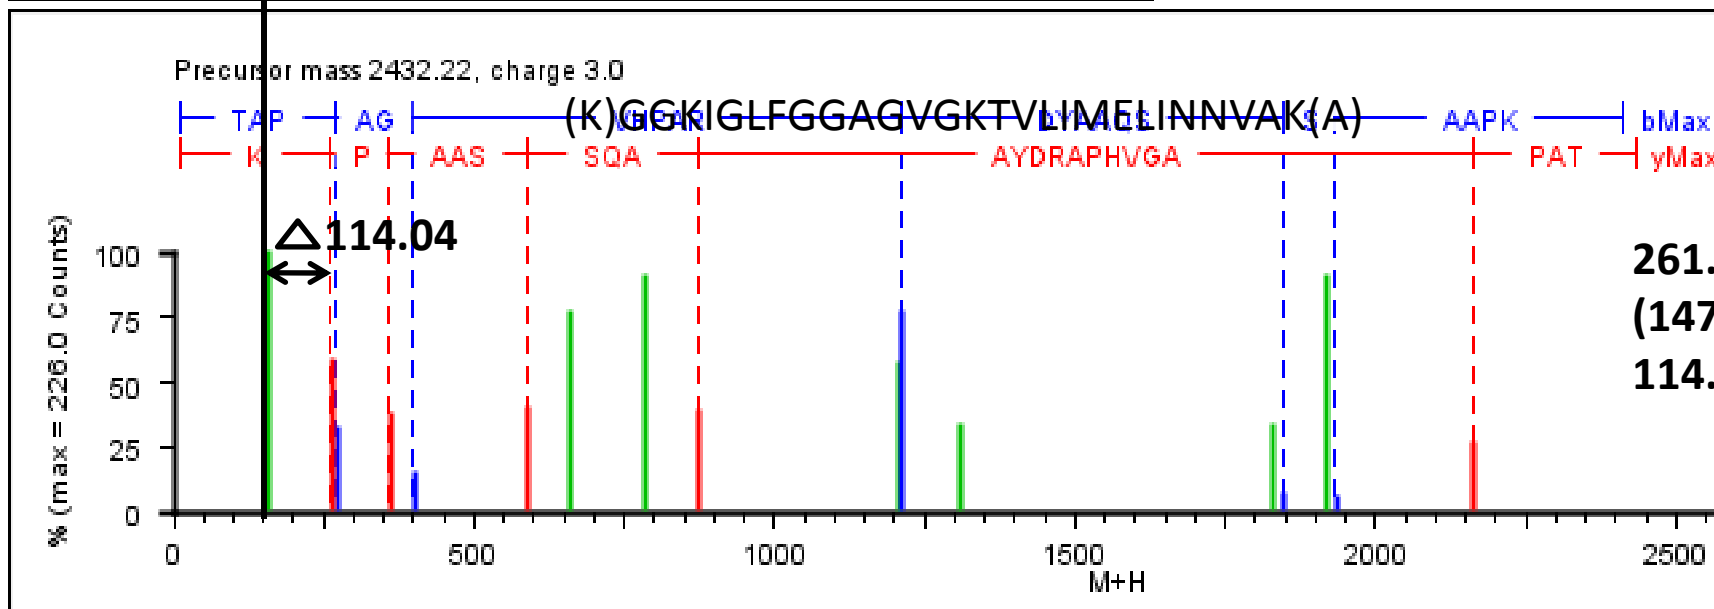

261.1413:  
(147.10+  
114.85)

35-55

(R)TAPAGVHPARDYAAQSSAAPK(Ubi)(A)

Enolase

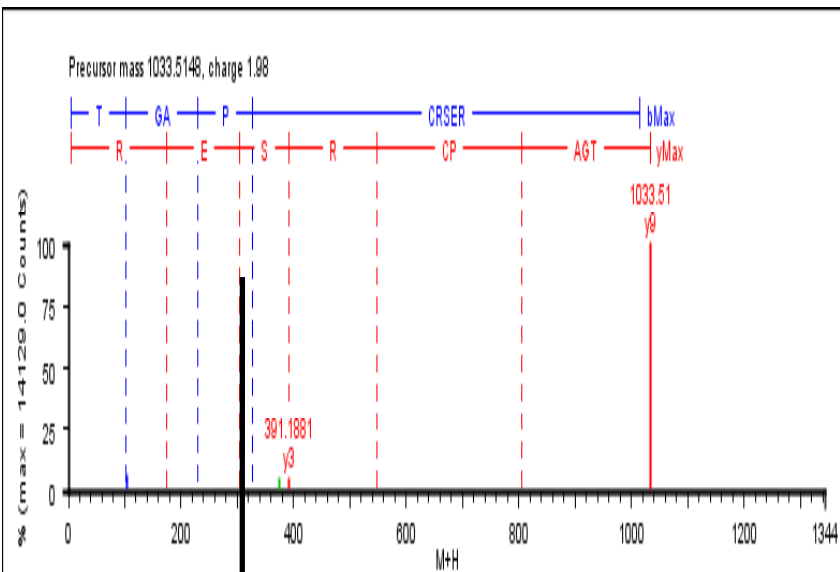

**304.1511**

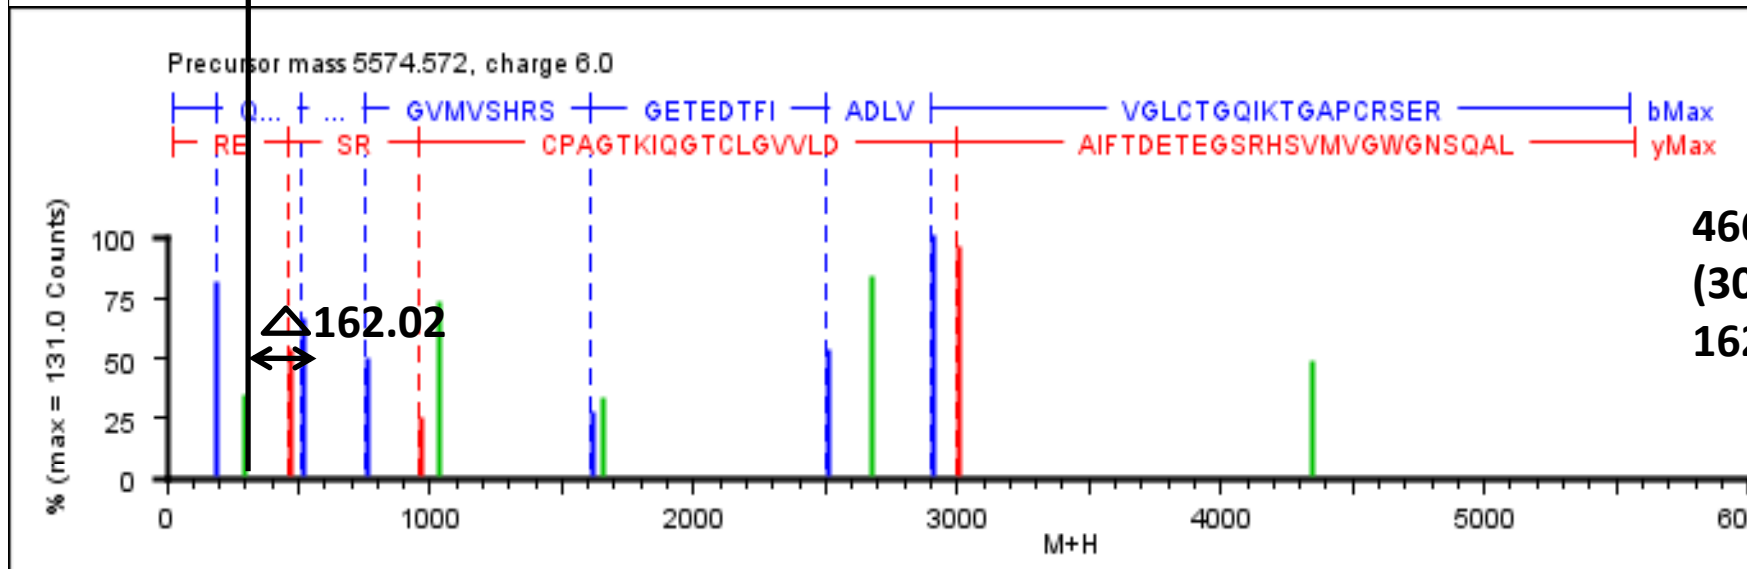

**466.1734:  
(304.15+  
162.02)**

**356-403 (K)LAQSNWGVMSVSHRSGETEDTFIADLVVGLCTGQIKTGAPCRSER(Gly)(L)**

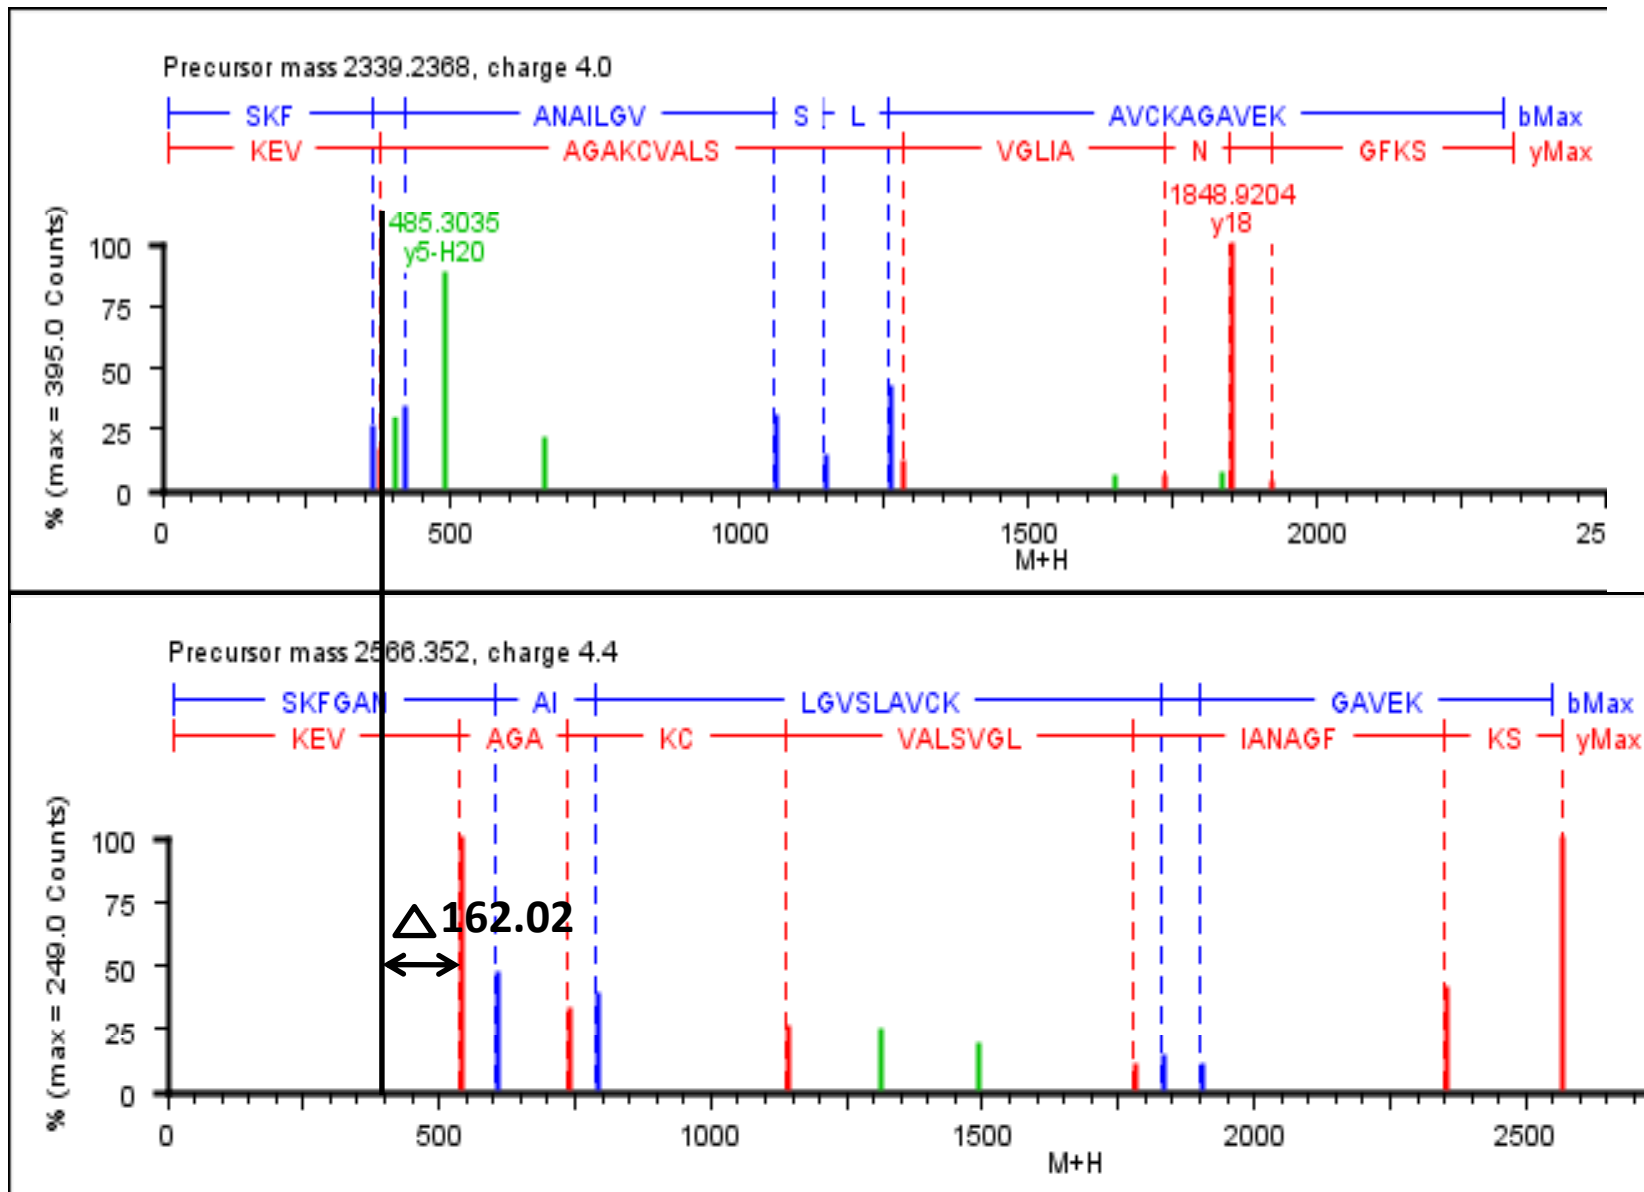

375.2169

537.2874:  
 (375.21+  
 162.02)

104-126

(K)SKFGANAILGVSLAVCKAGAVEK(Gly)(G)

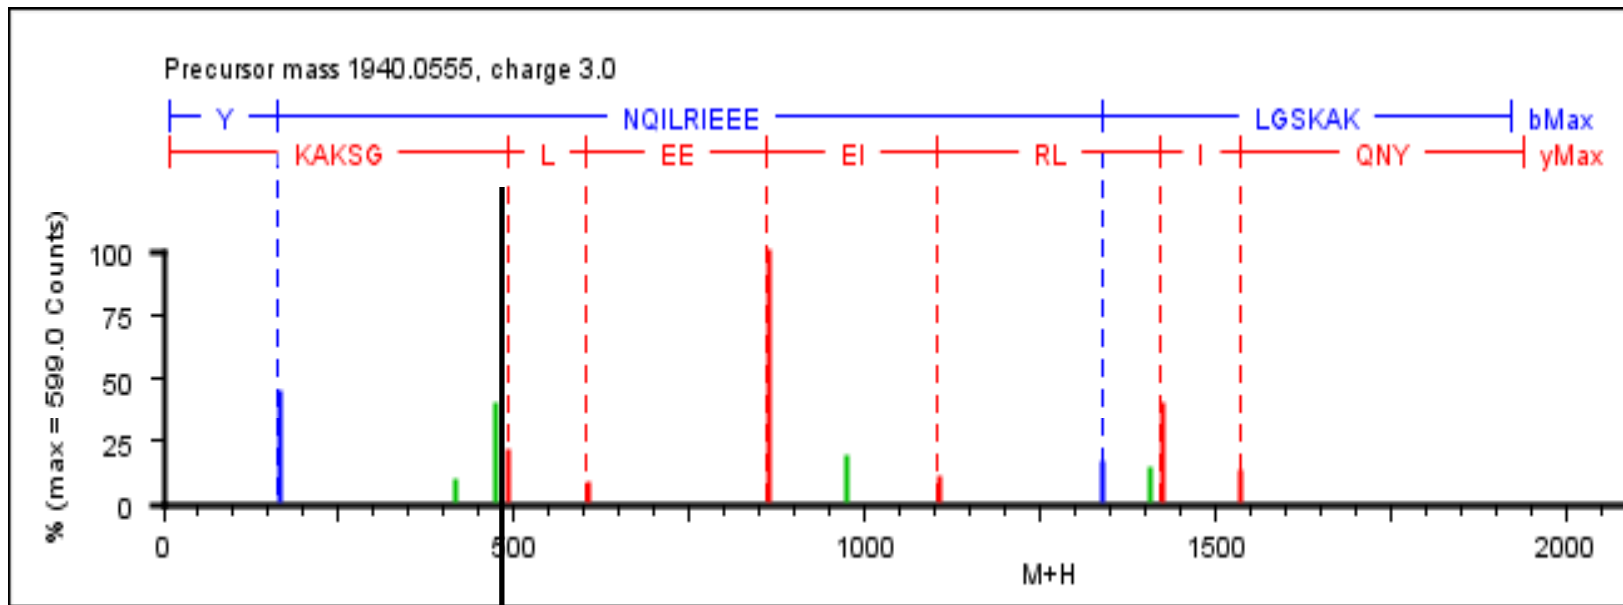

490.2533

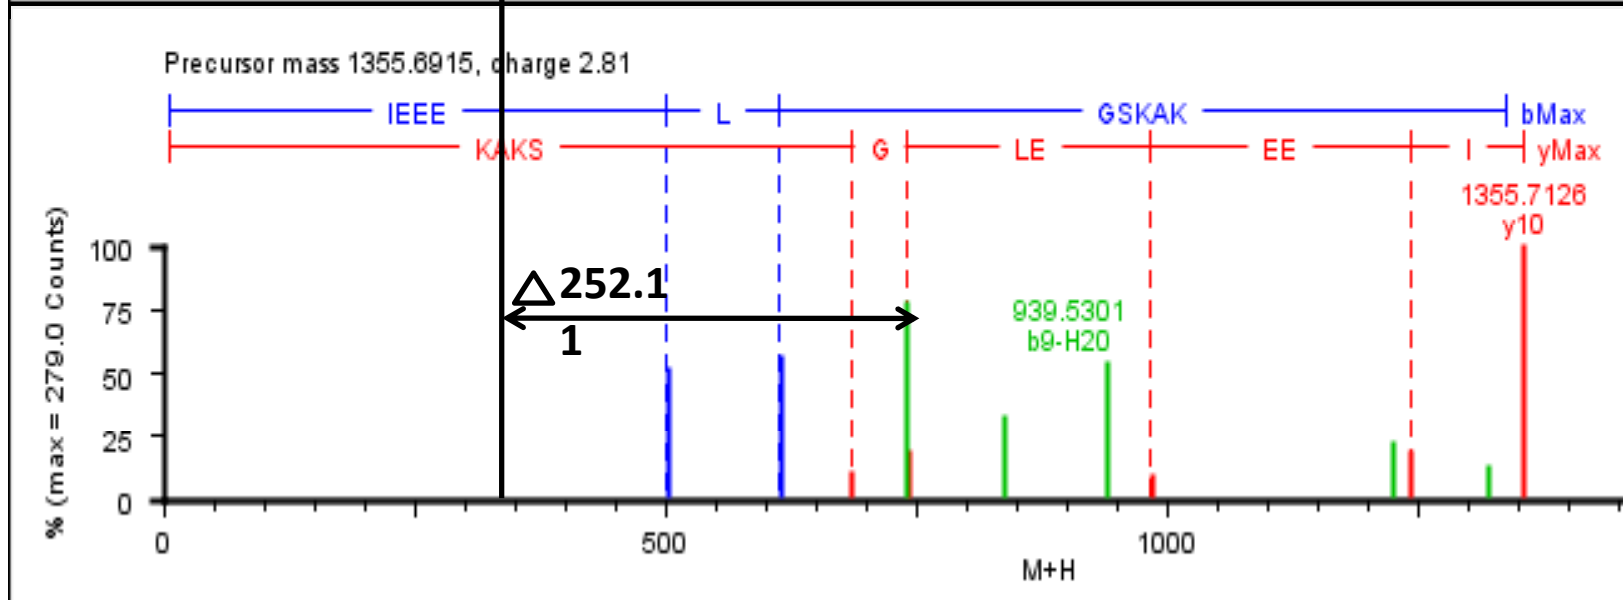

742.4358

413-422

(R)IEEELGSKAK(Crossline)(F)



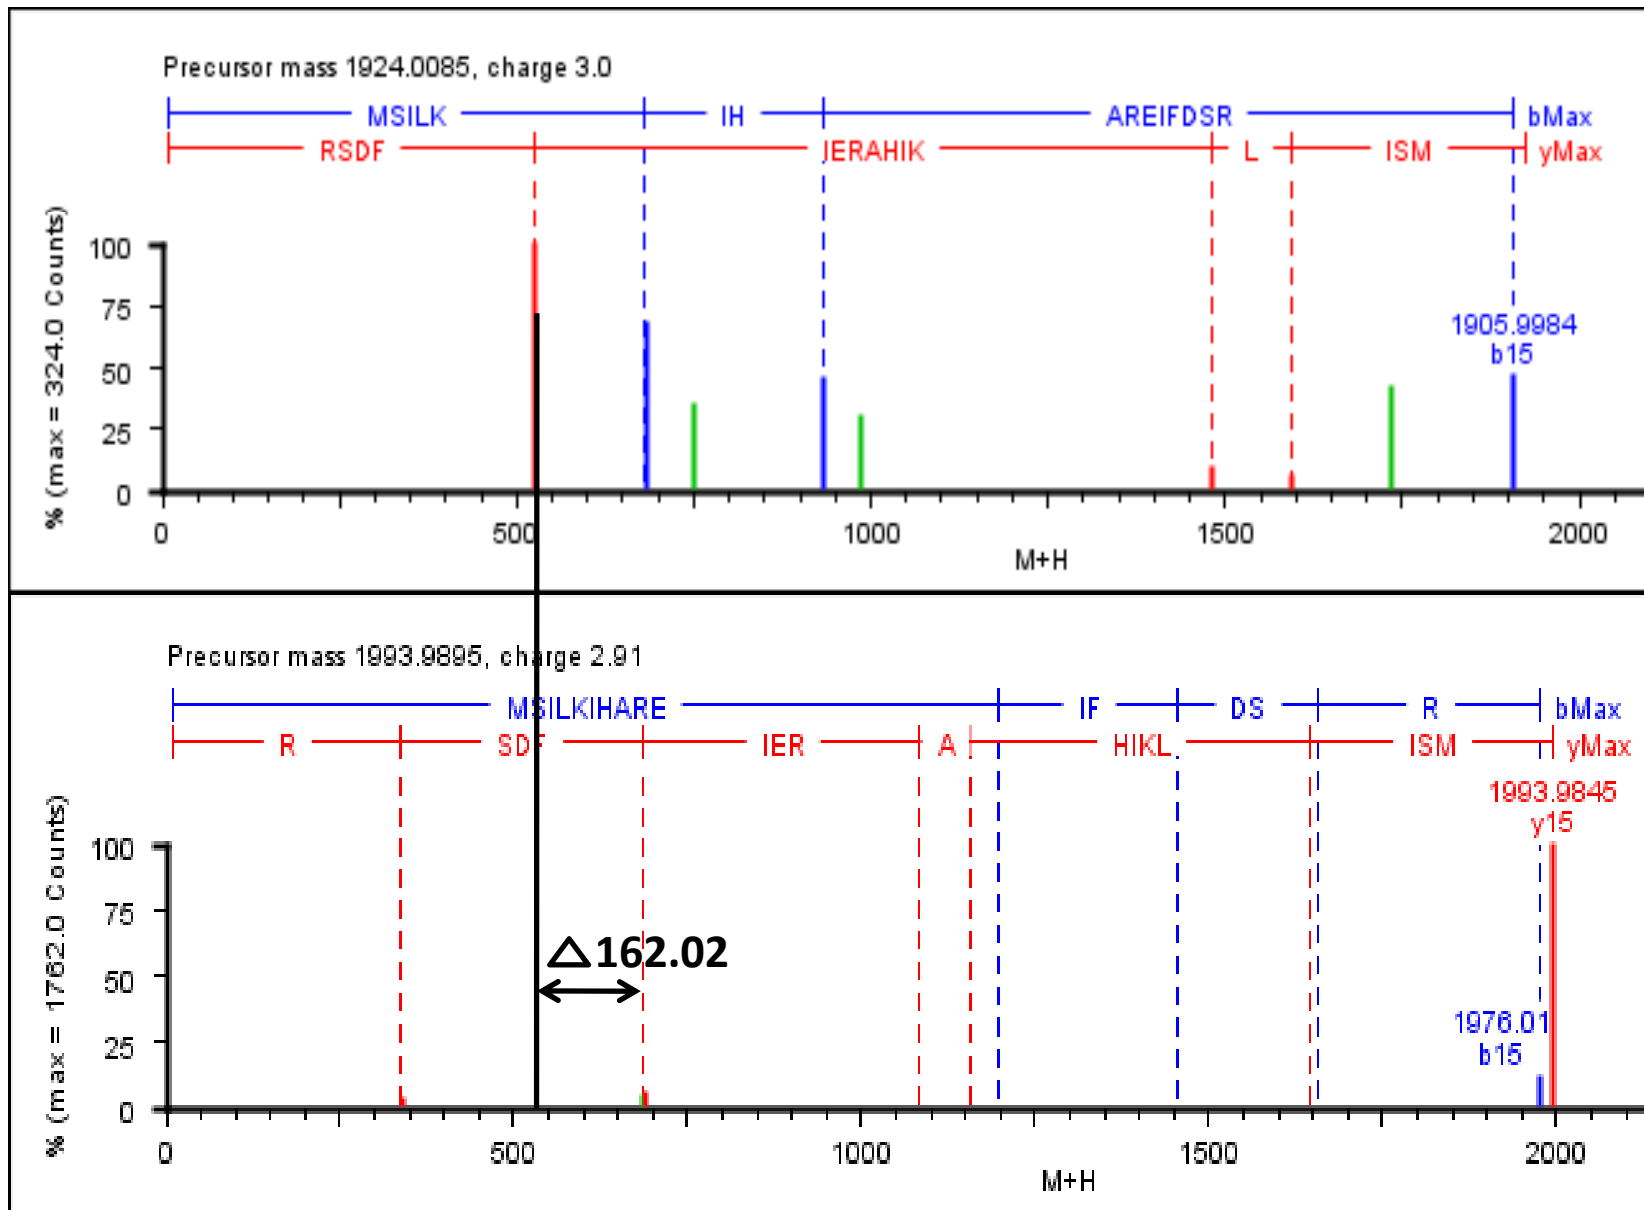

524.2554

686.2645:  
(524.2554  
+ 162.02)

1-15

(-)MSILKIHAREIFDSR(Gly)(G)

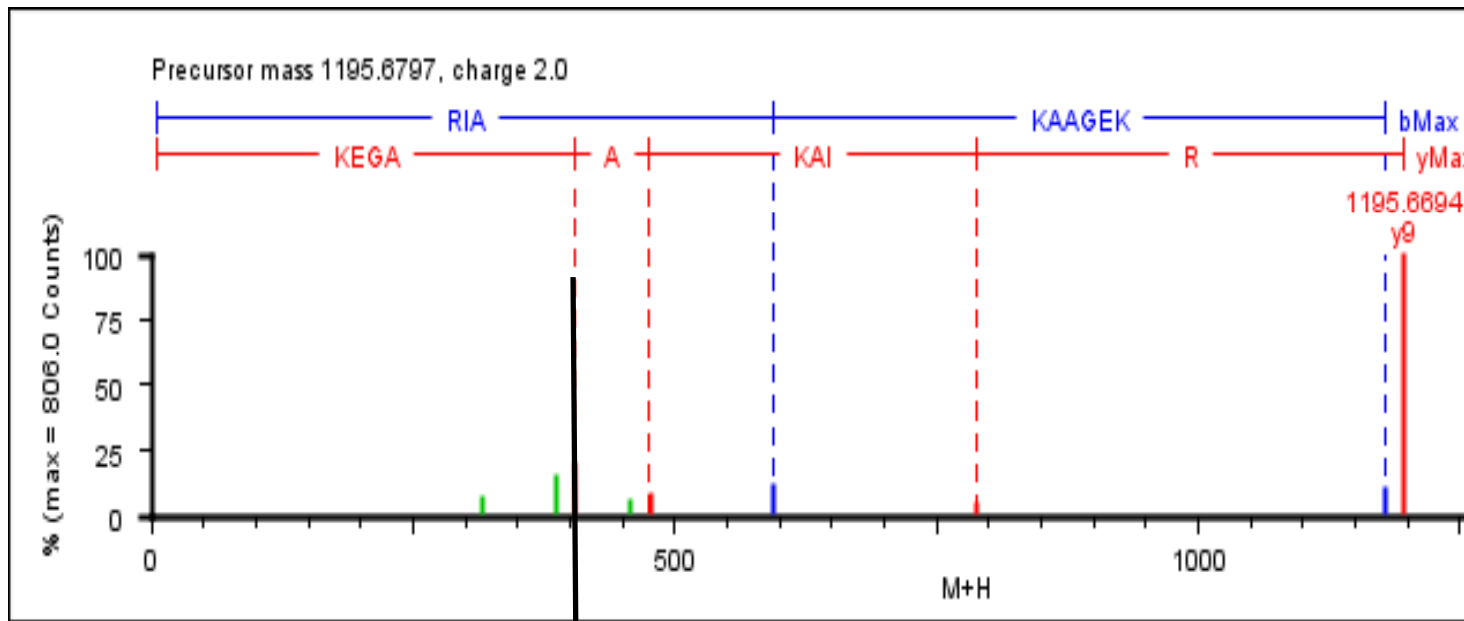

404.2195

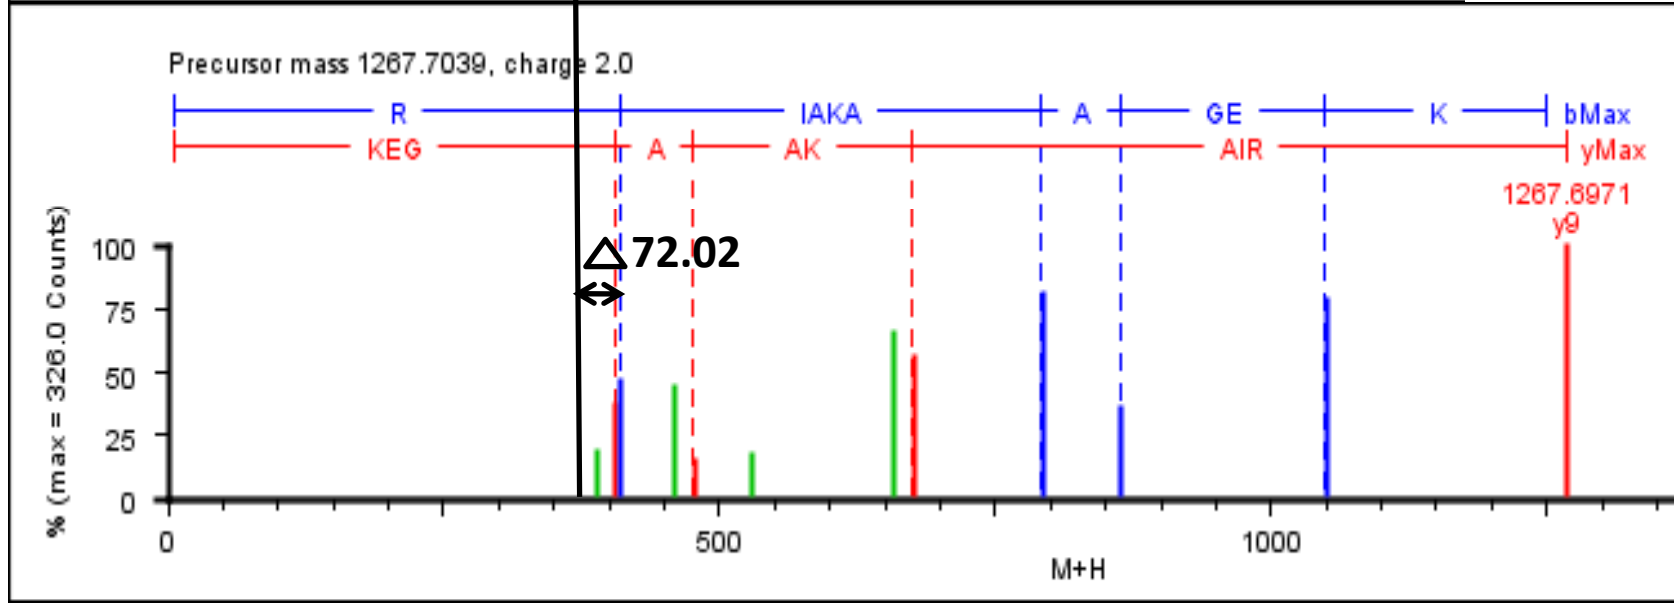

476.262:  
(404.21+  
72.02)

327-335

(K)RIAKAAGEK(CEL)(S)

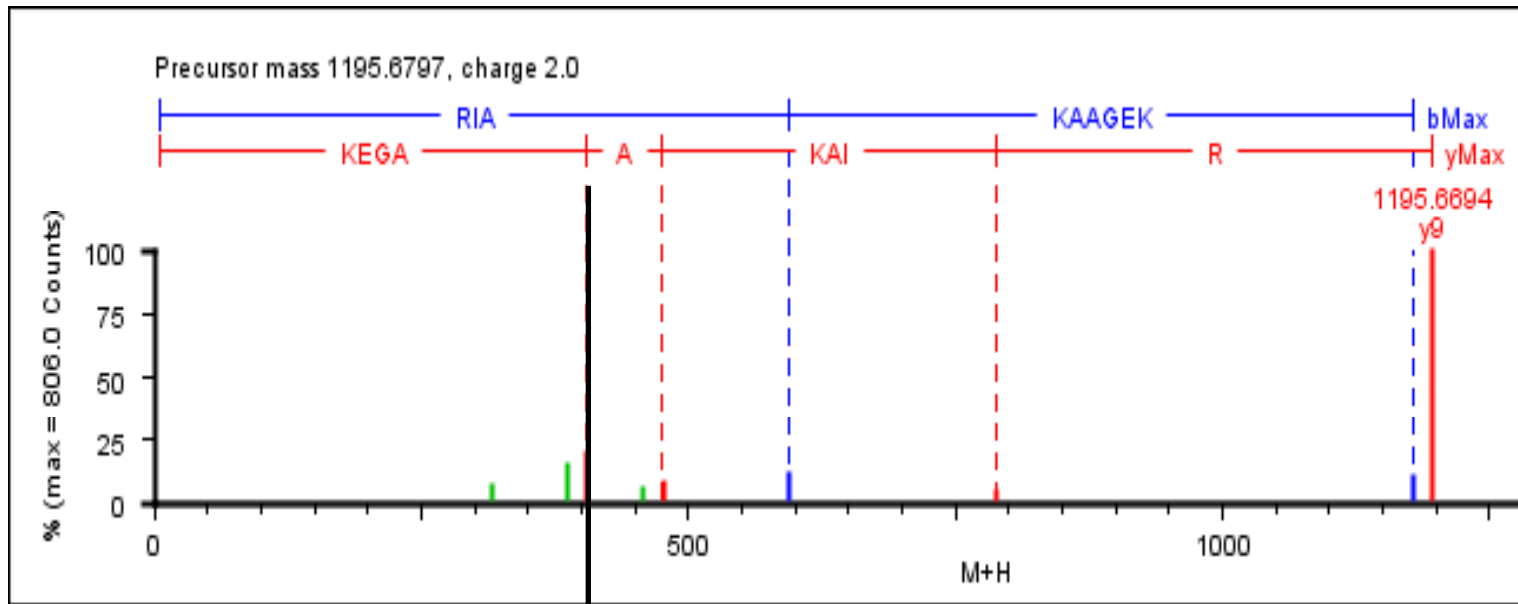

404.2195

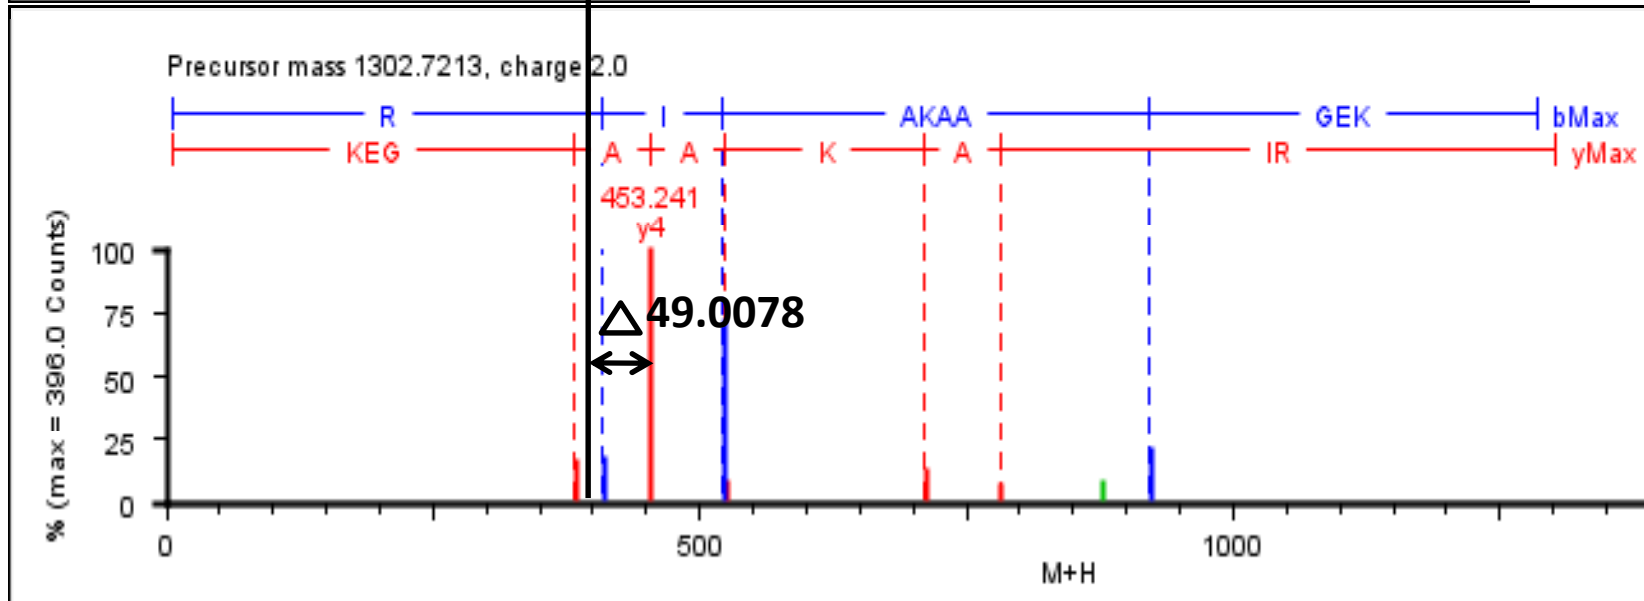

453.241:  
(404.21+  
49.00)

327-335

(K)RIAKAAGEK(MOLD)(S)

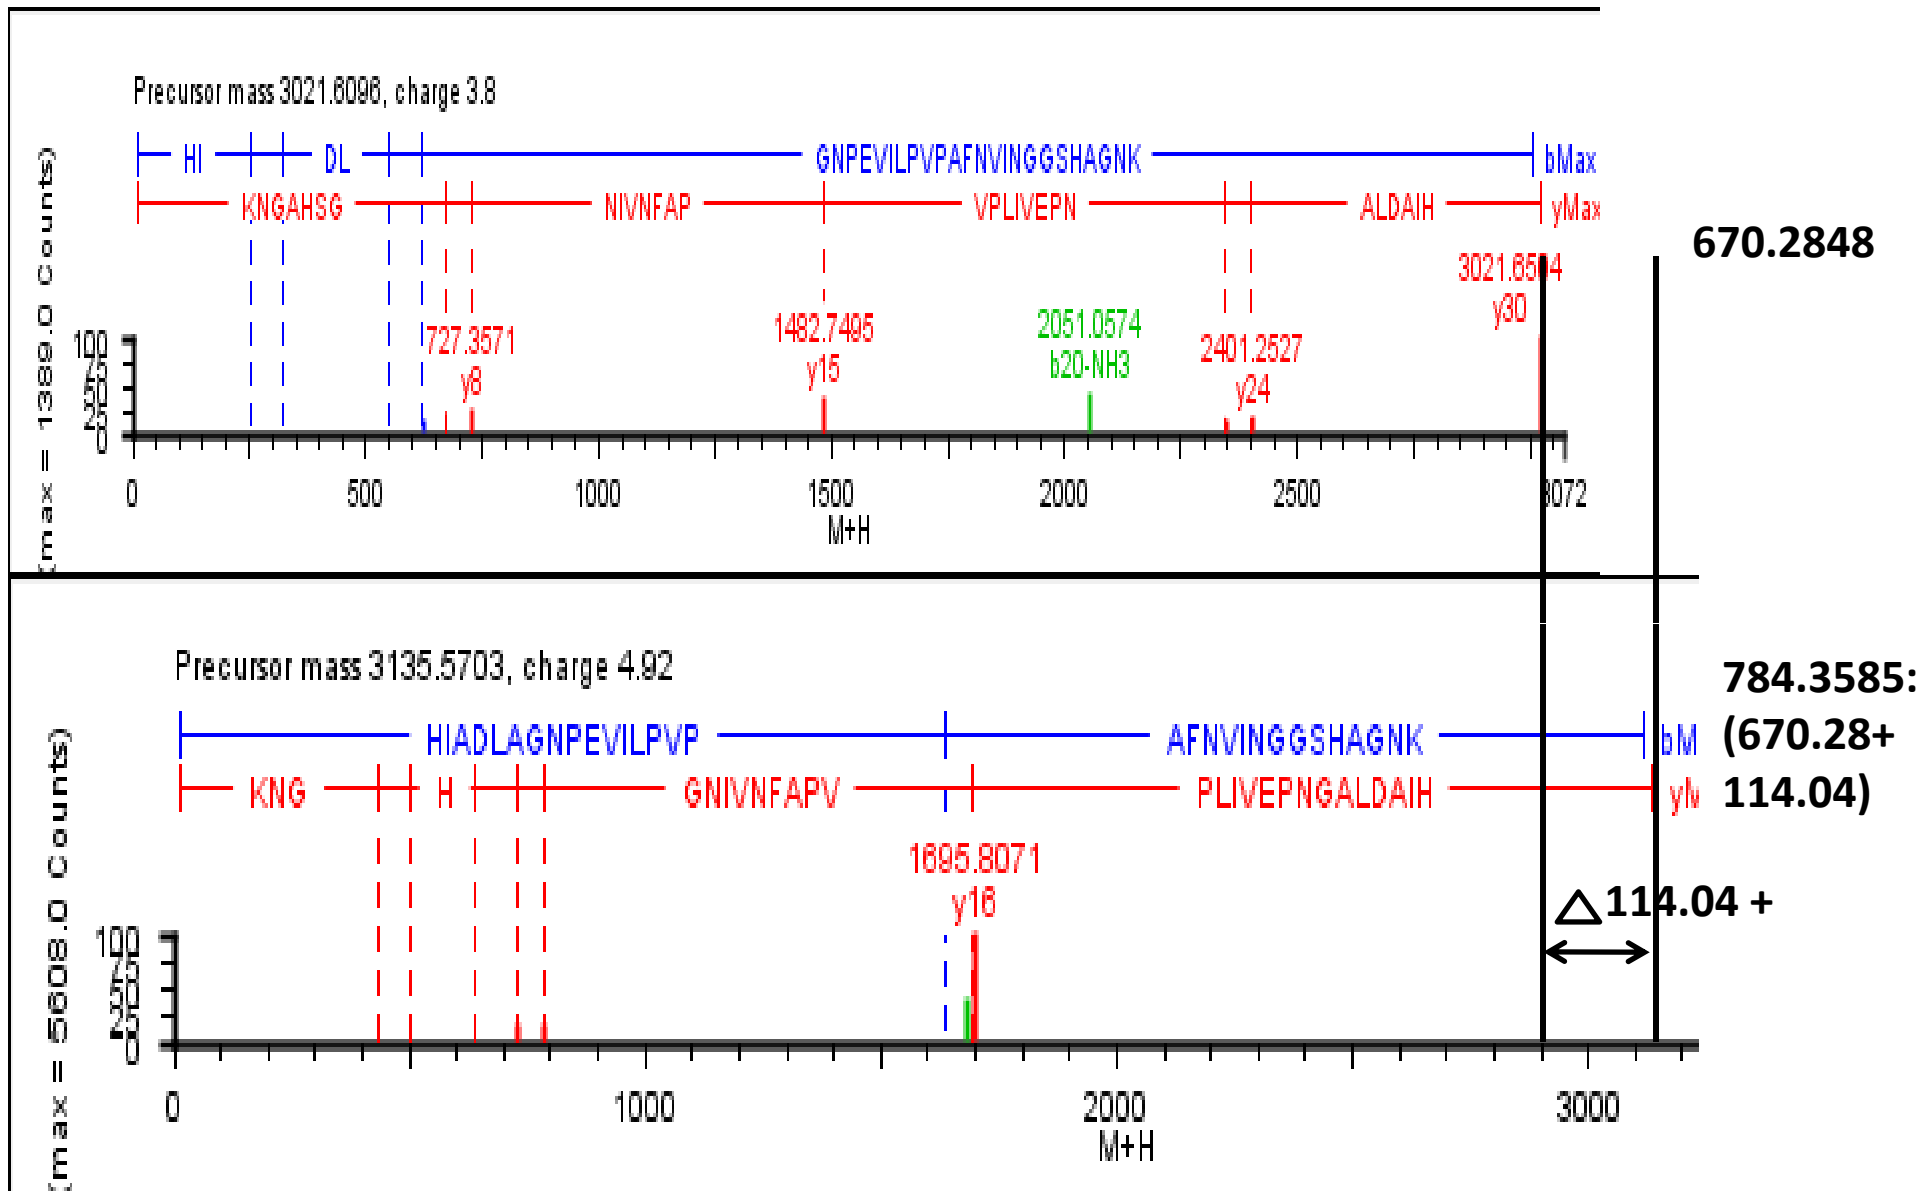

133-162

(R)HIADLAGNPEVILPVPVAFNVINGGSHAGNK(Ubi)(L)

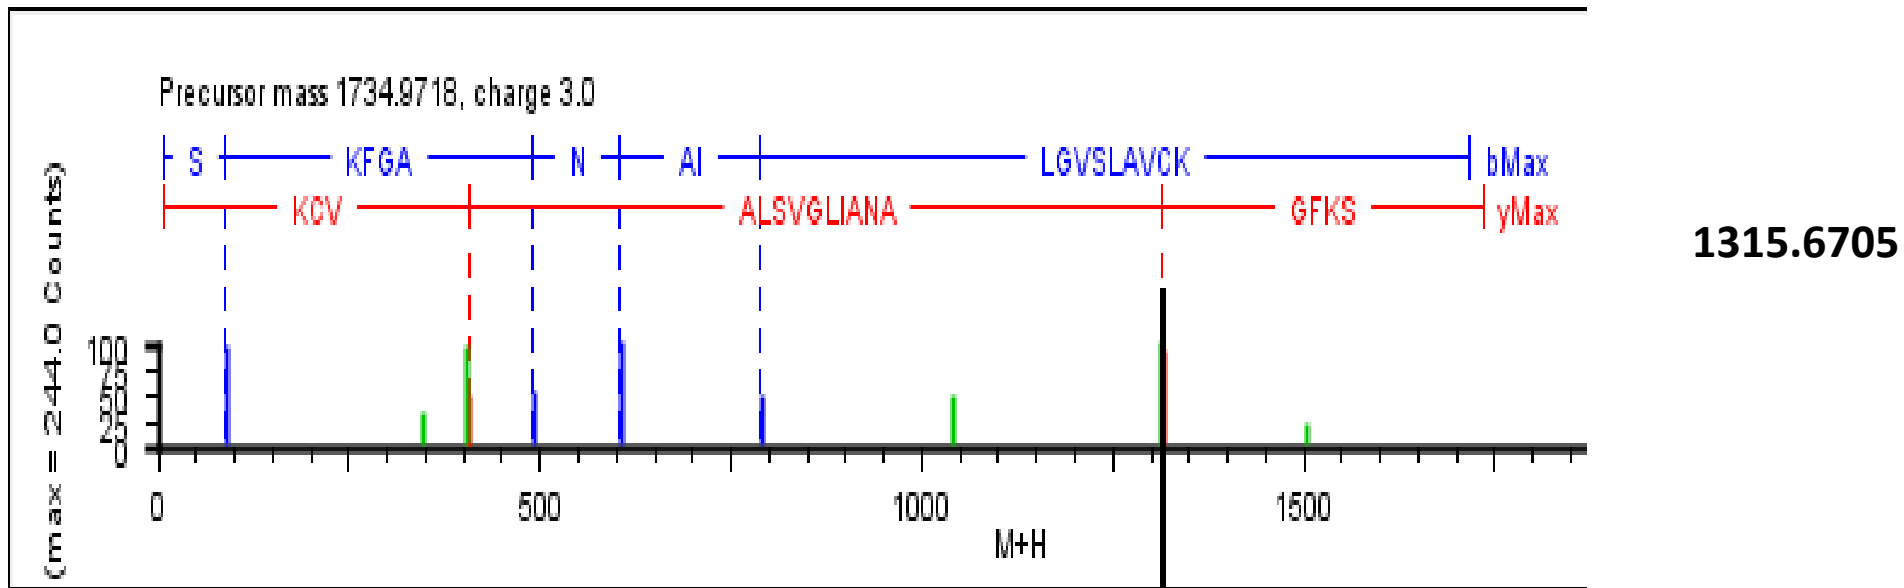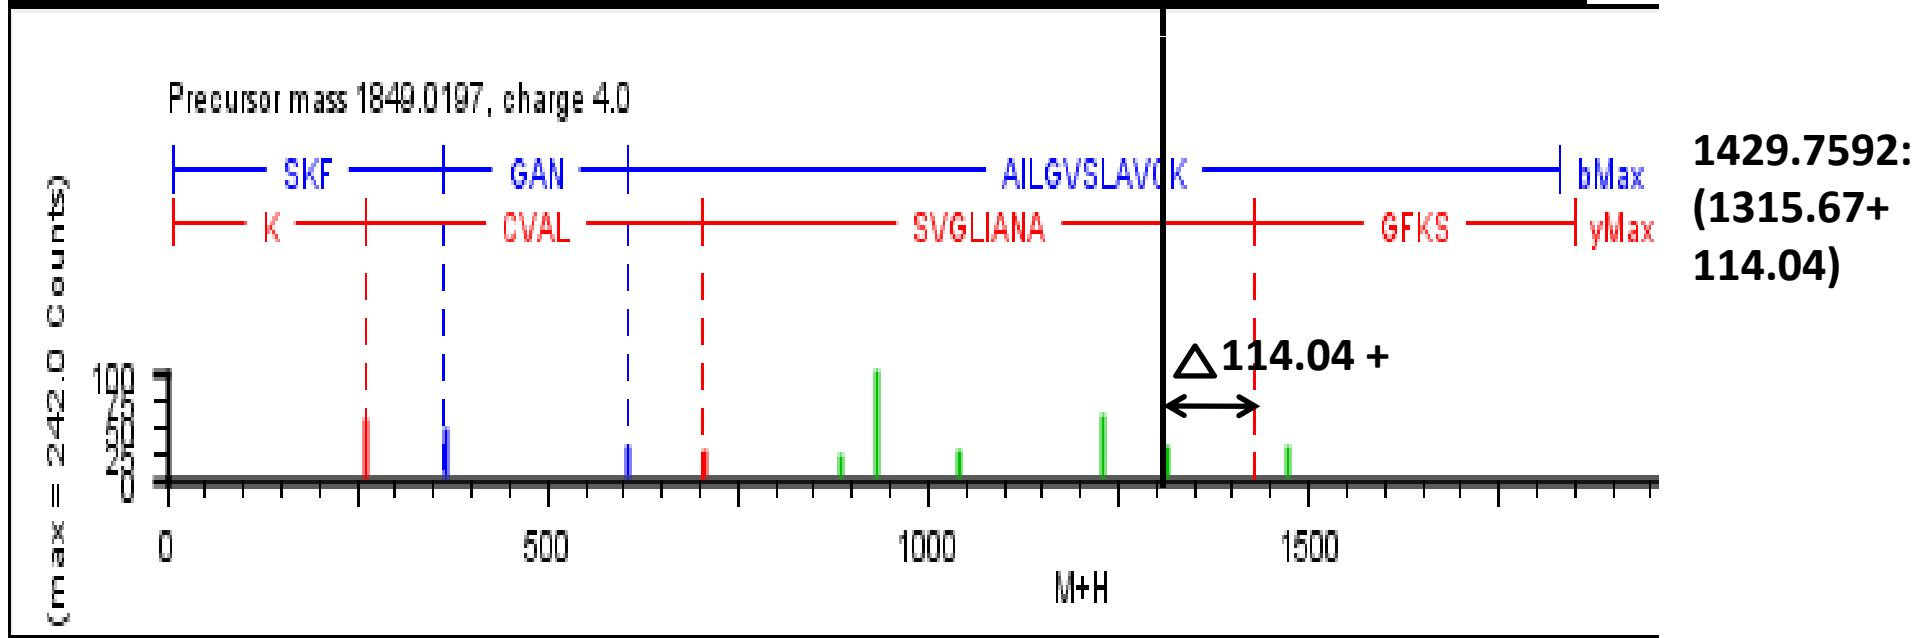

104-120

(K)SKFGANAILGVSLAVCK(Ubi)(A)

PGK

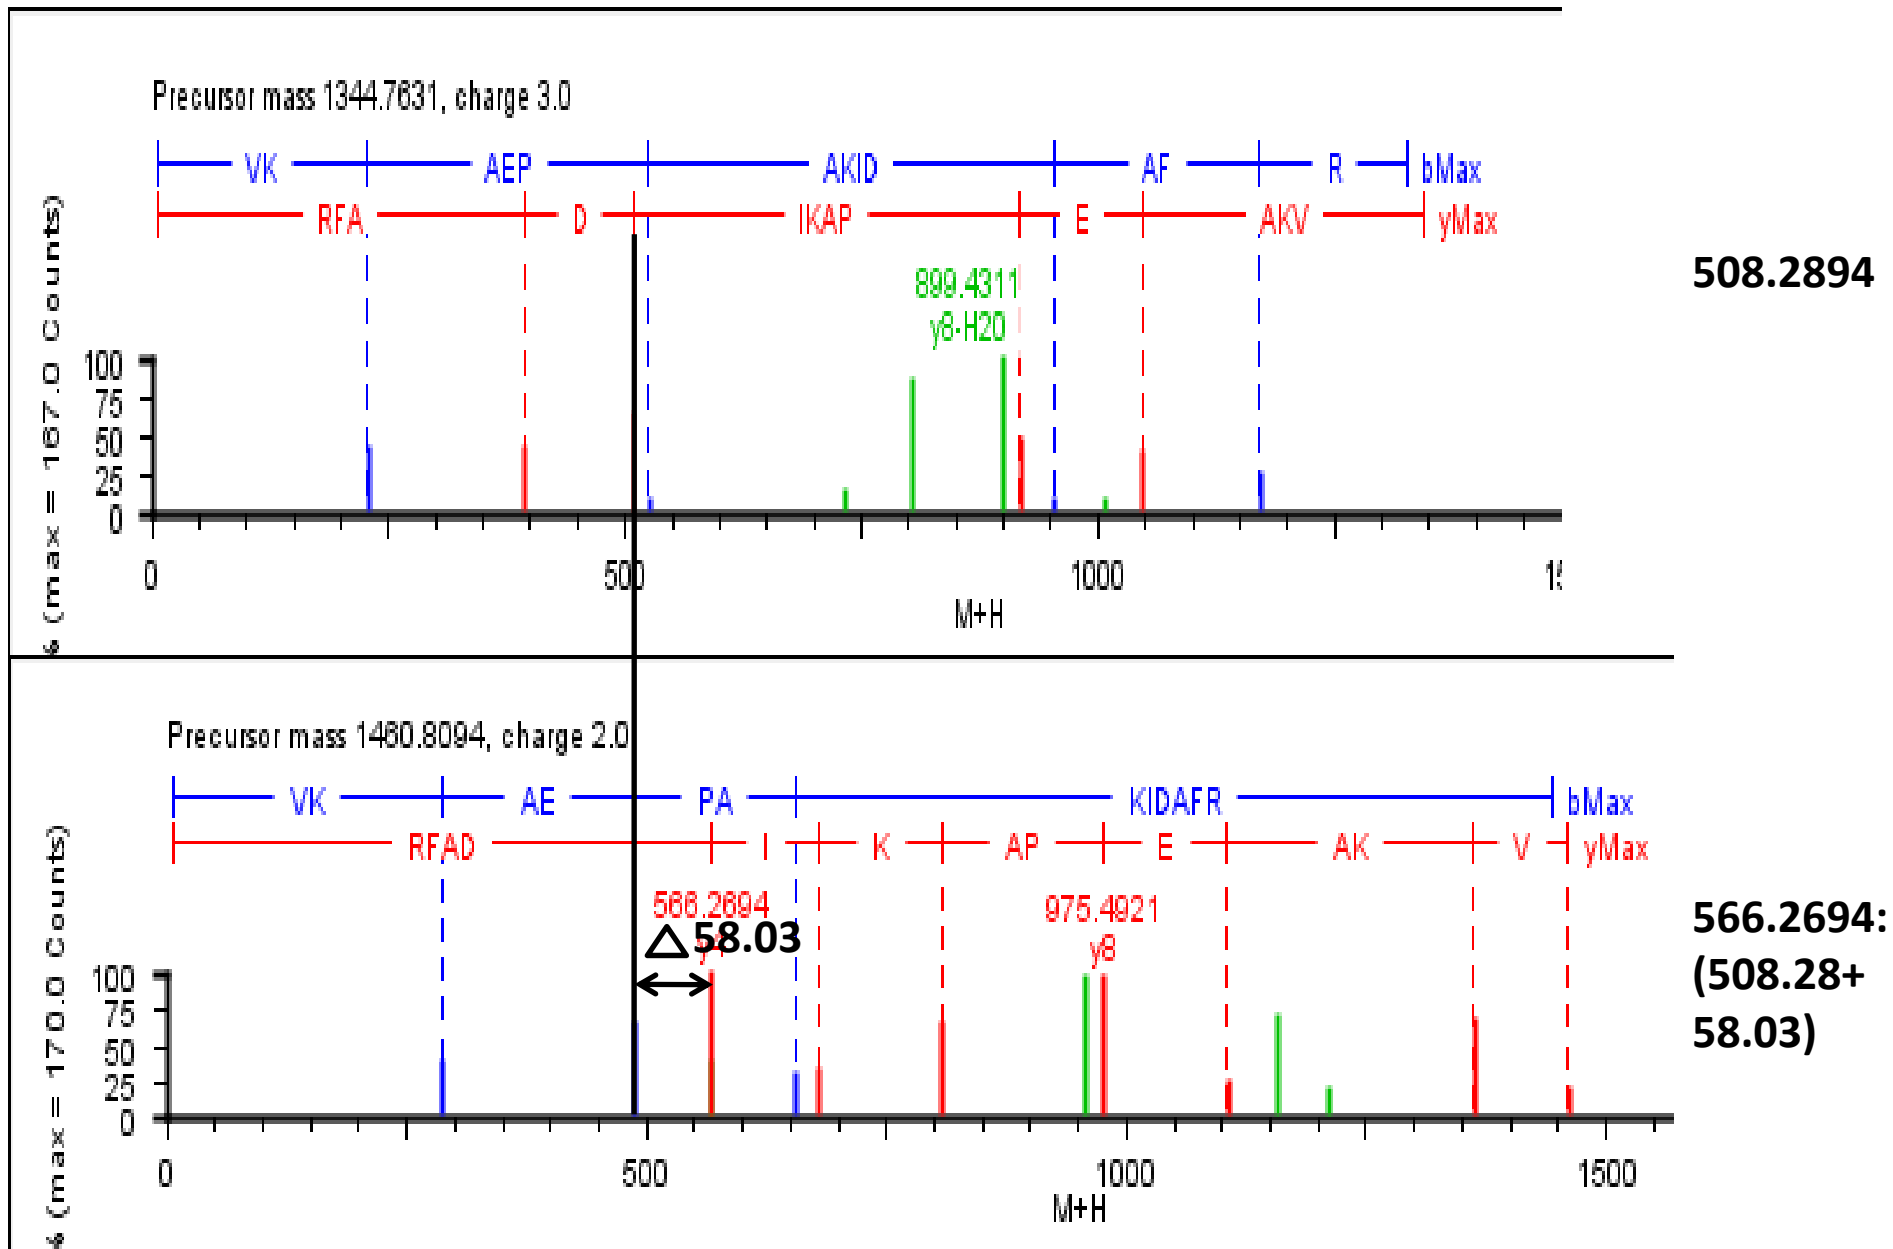

140-151

(K)VKAEPAKIDAFR(Pento)(A)

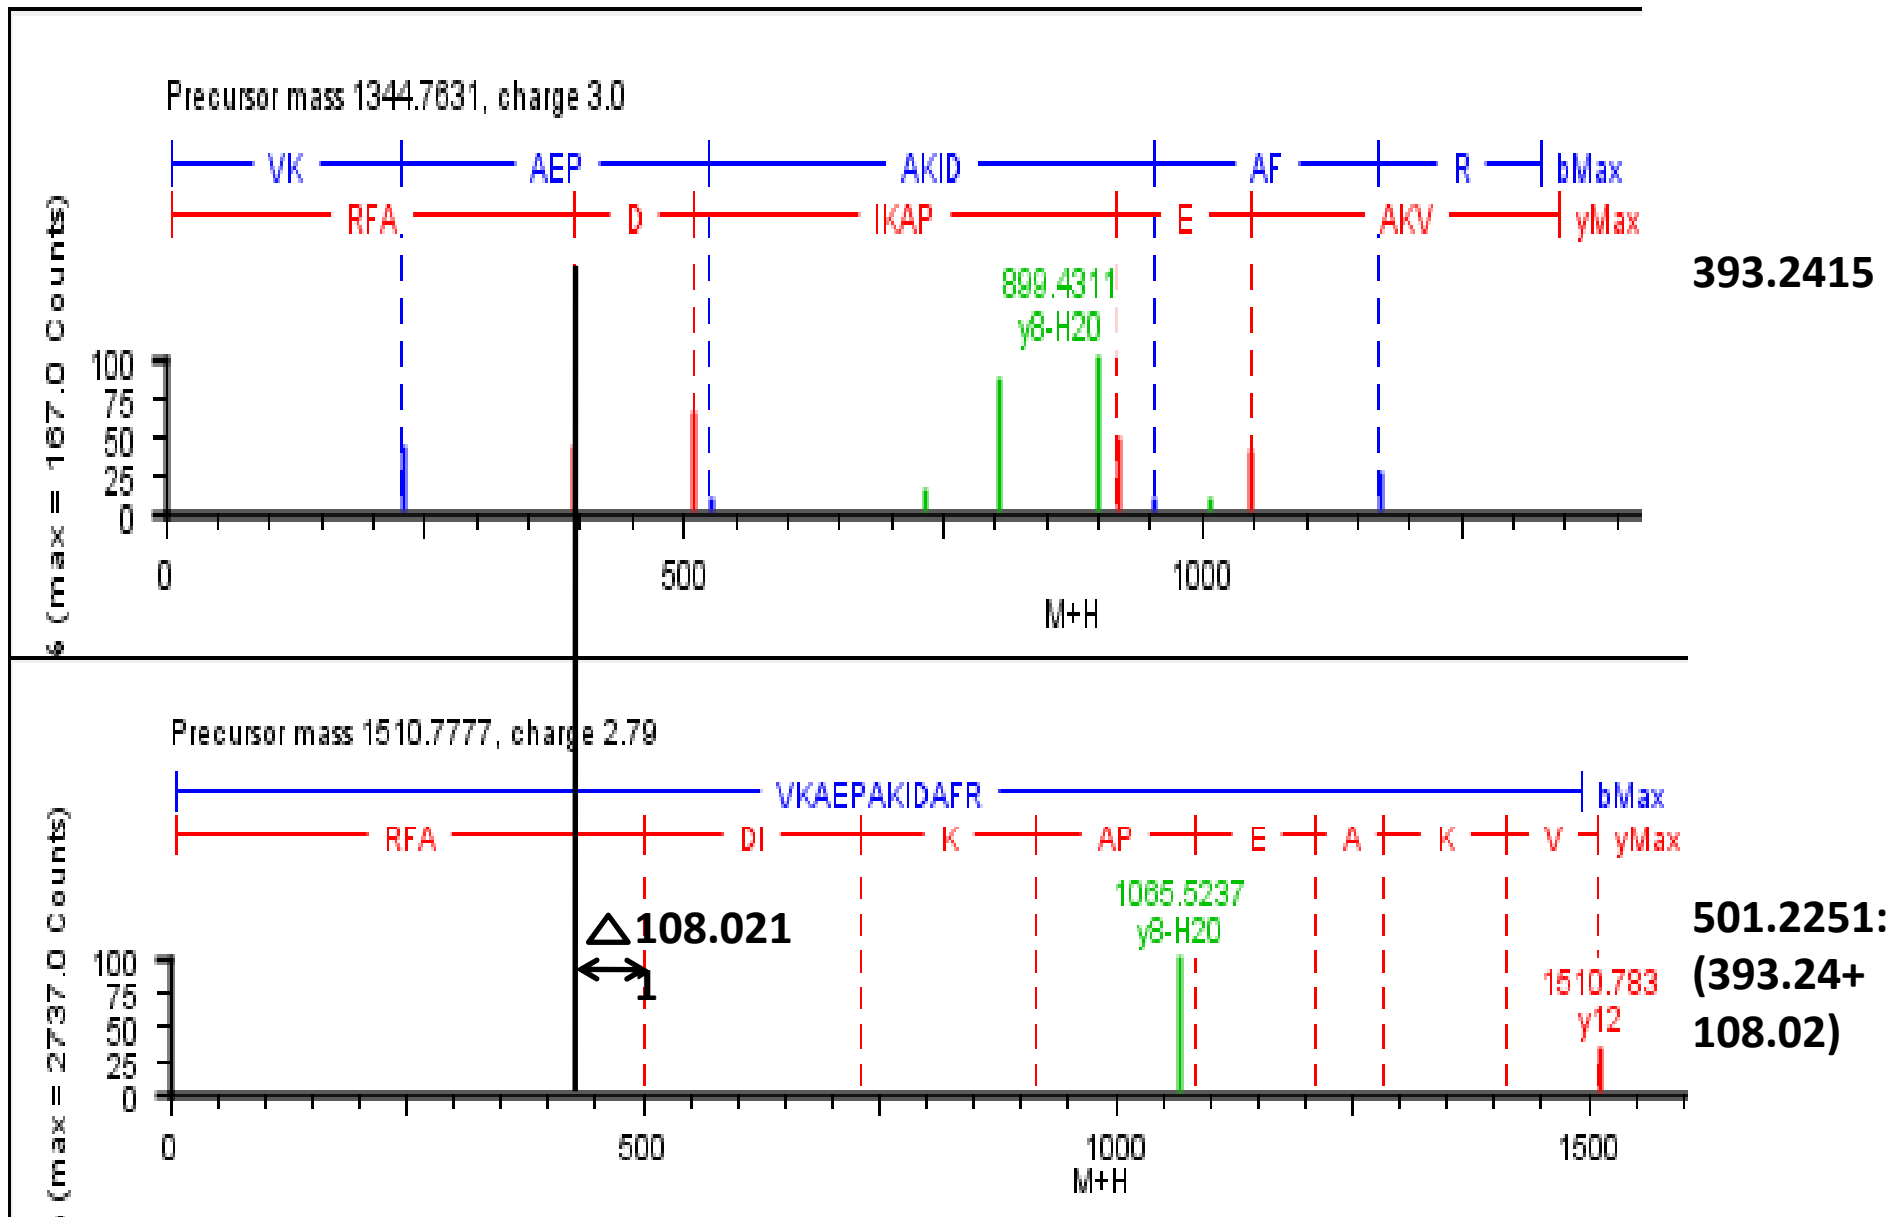

140-151

(K)VKAEPAKIDAFR(Pyr)(A)



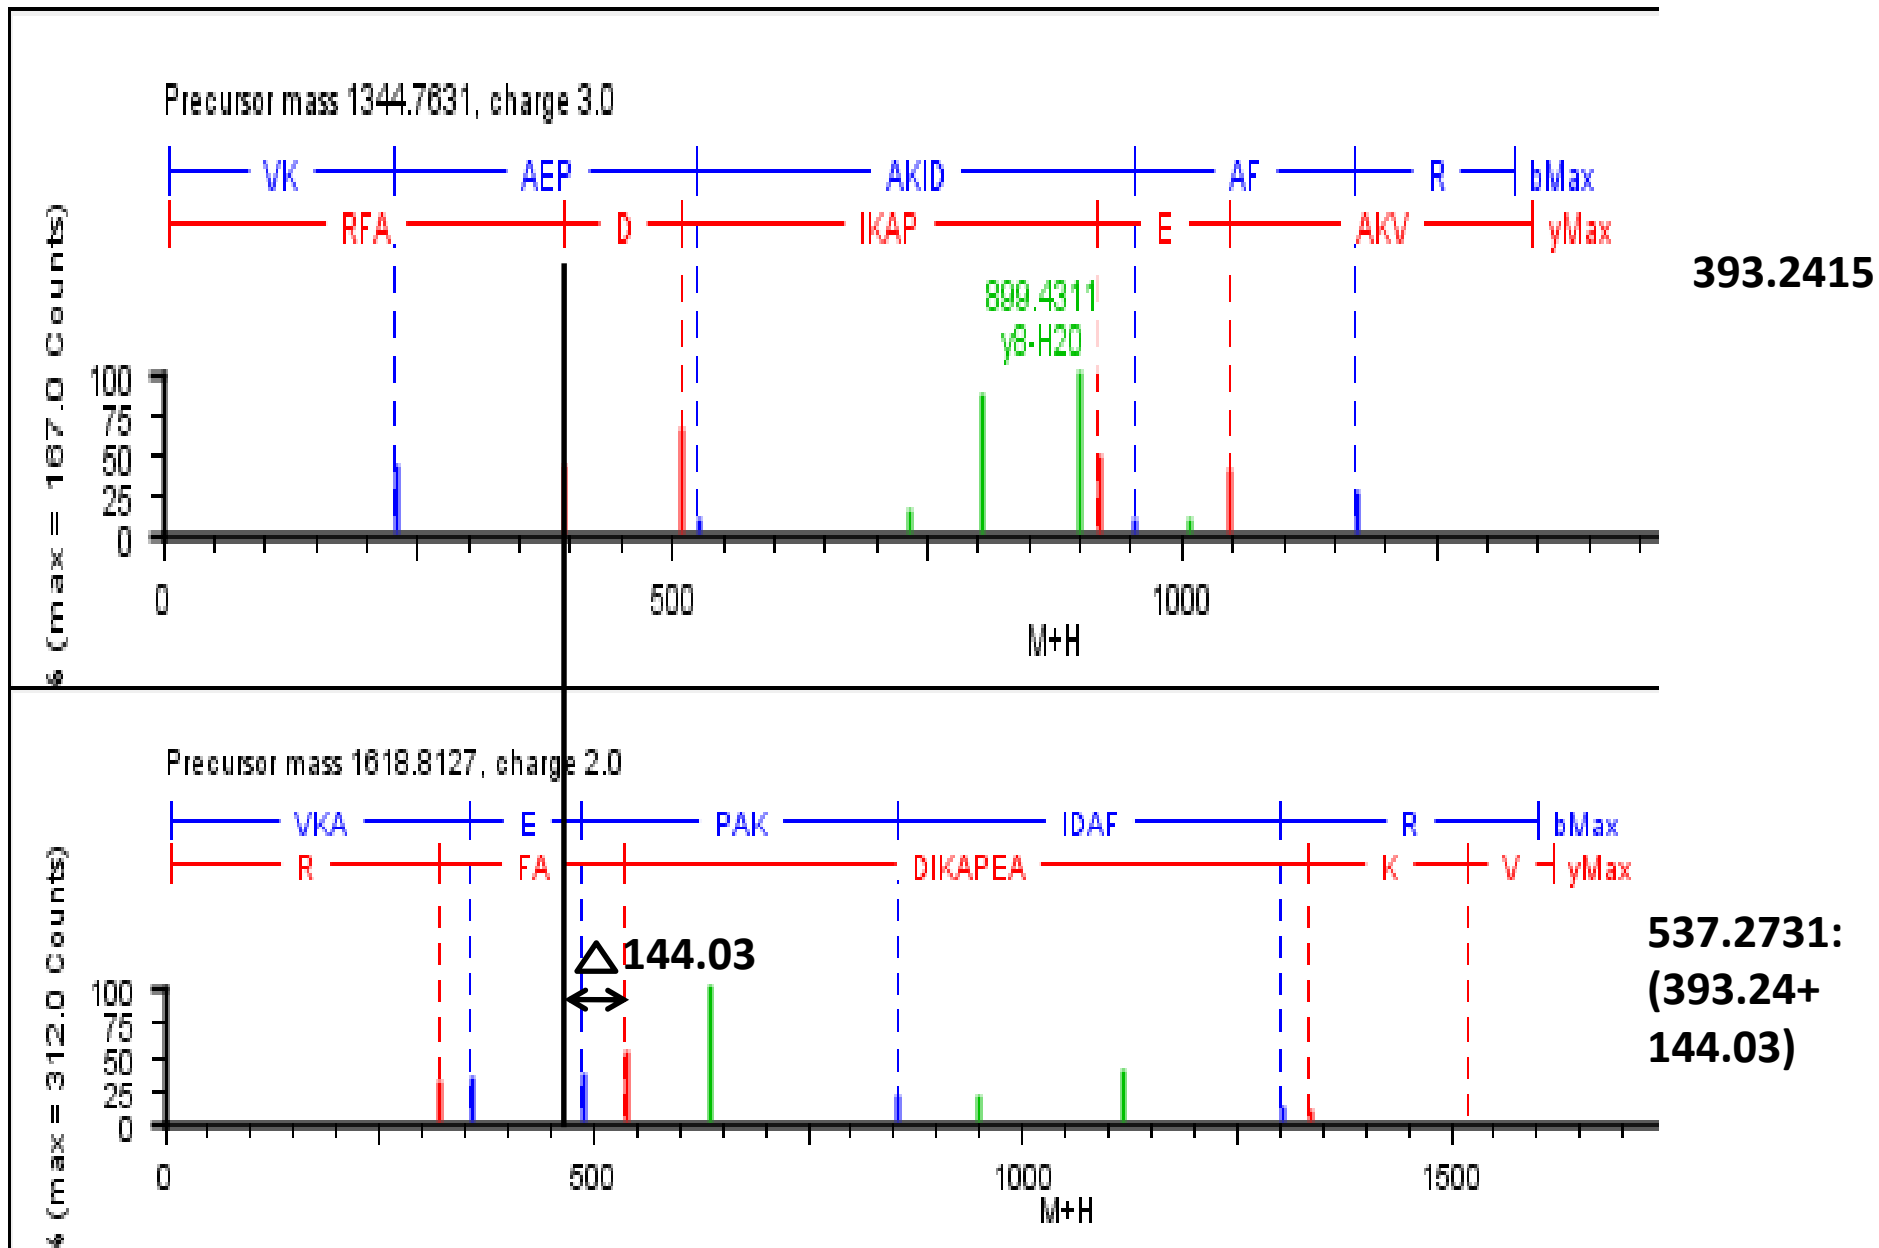

140-151

(K)VKAEPAKIDAFR(ImiA)(A)

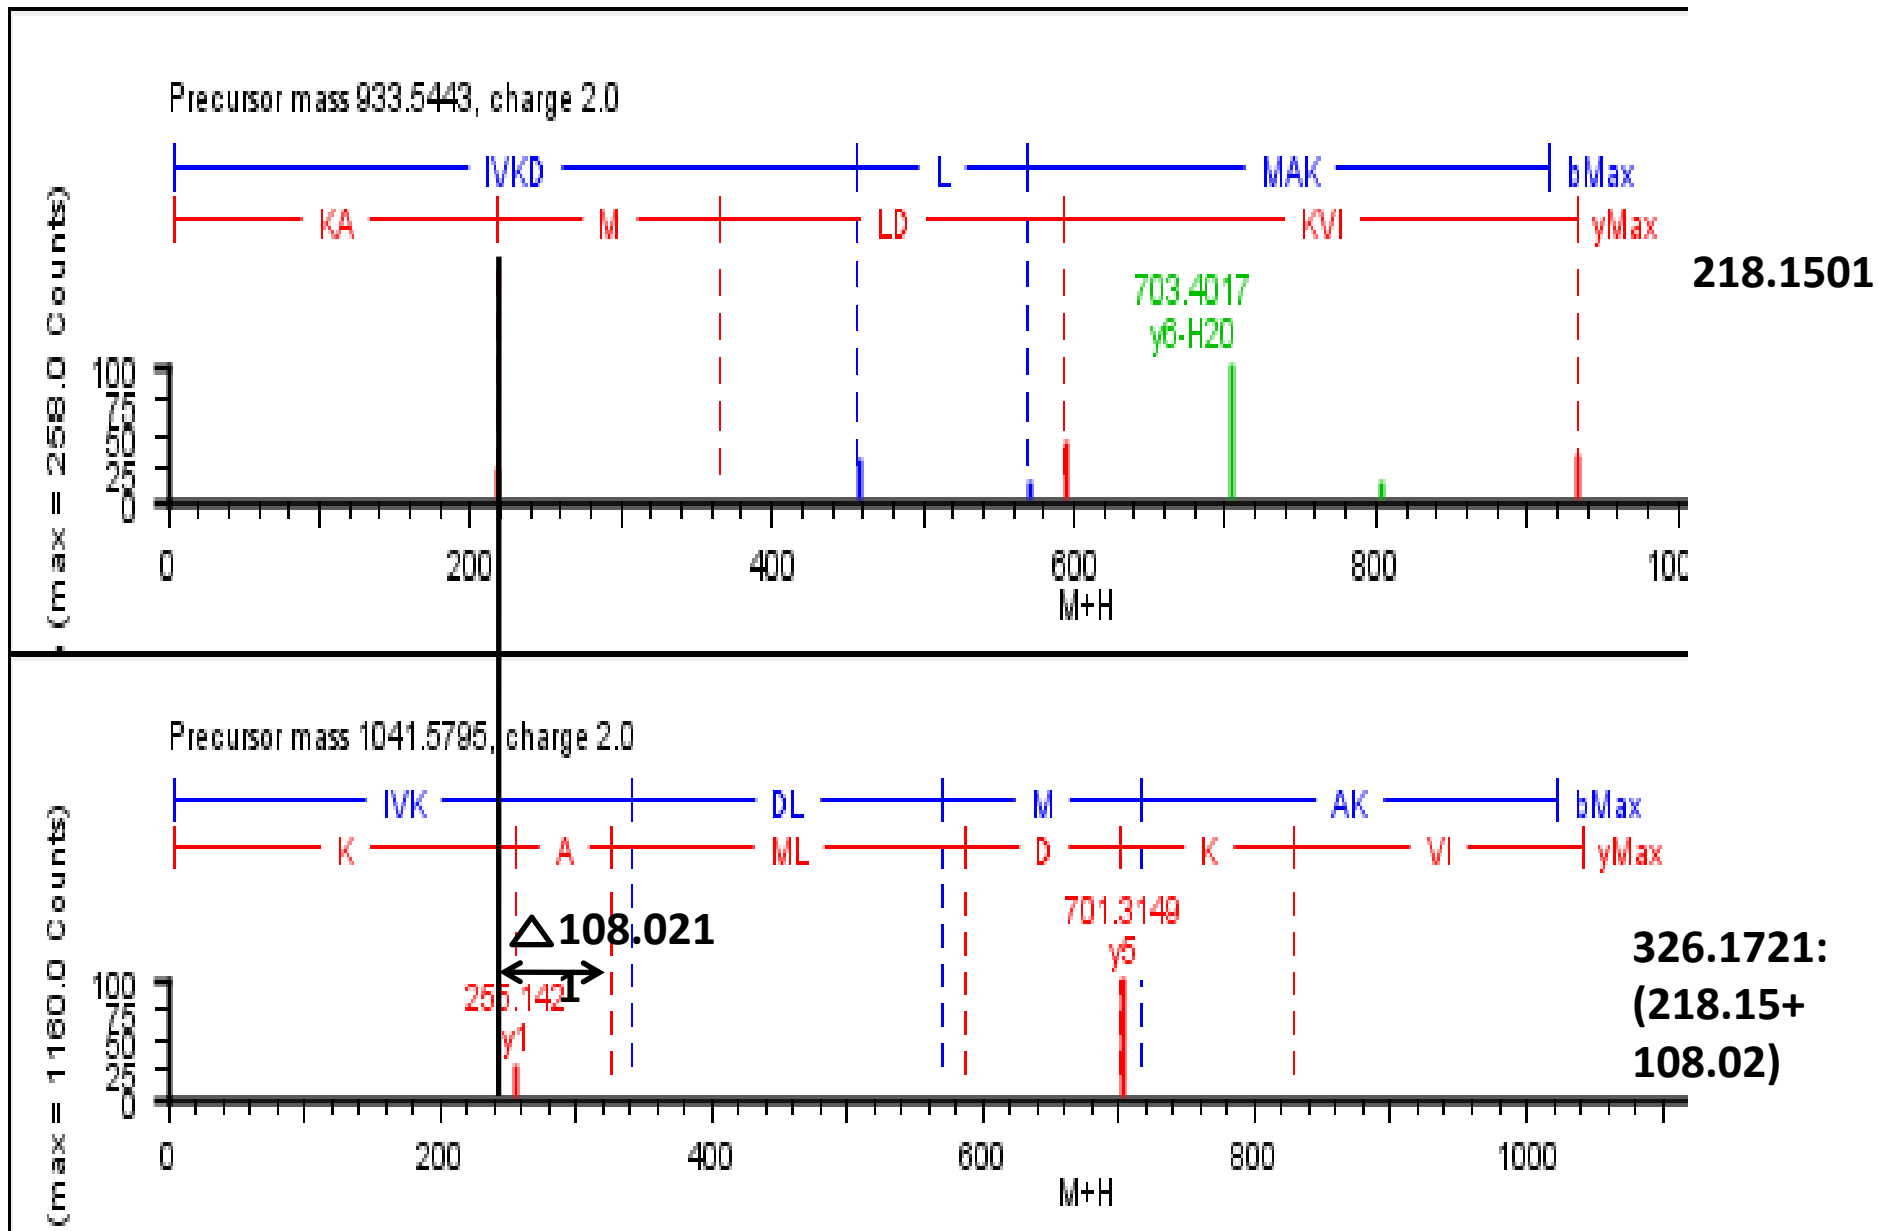

265-272

(K)IVKDLMAK(Pyr)(A)

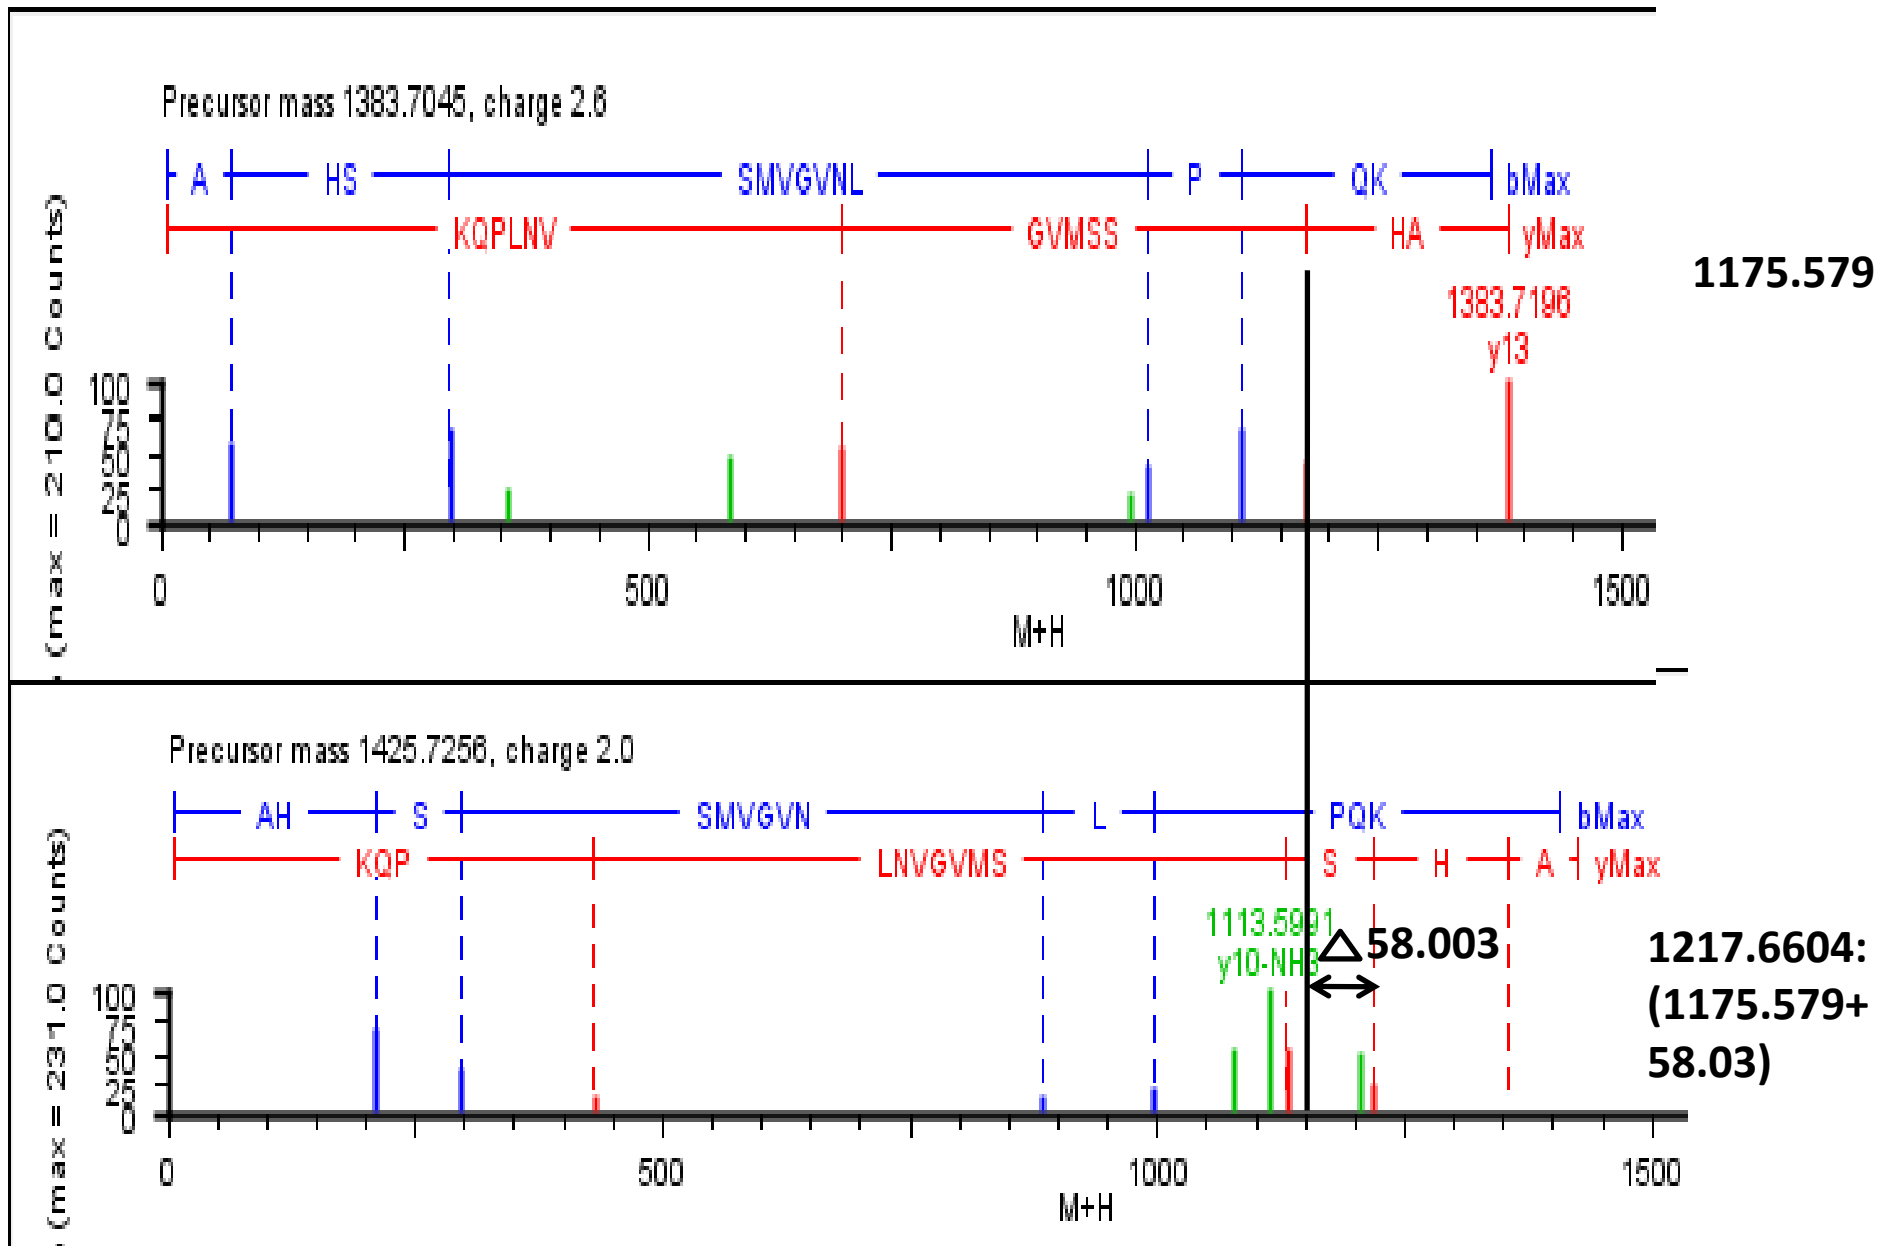

172-184

(R)AHSSMVGVNLPQK(CML)(A)

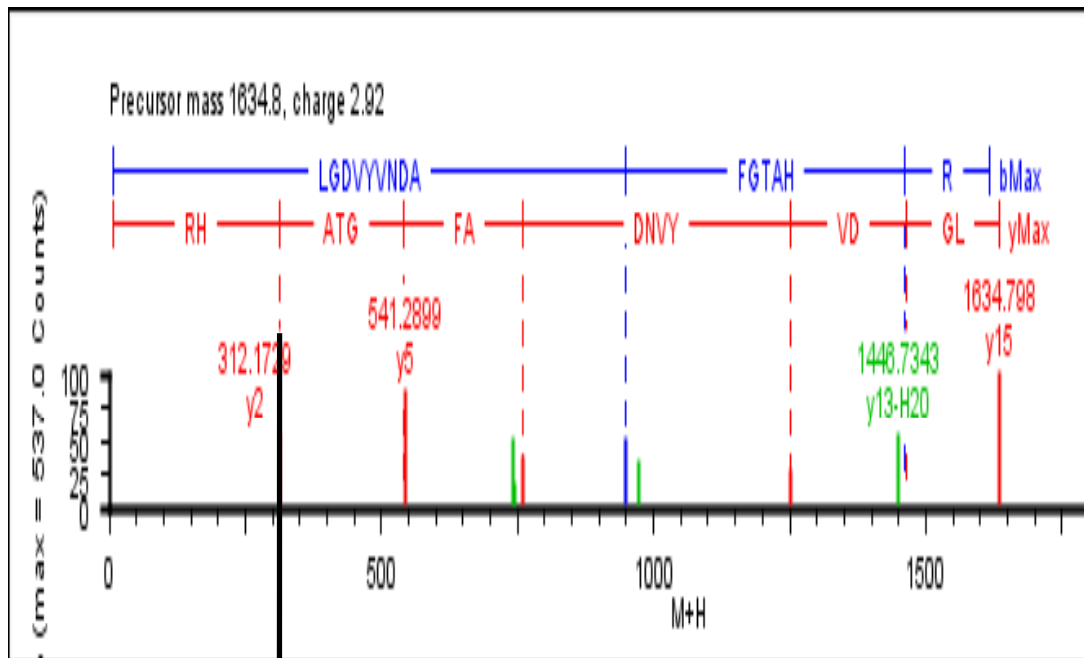

**312.1729**

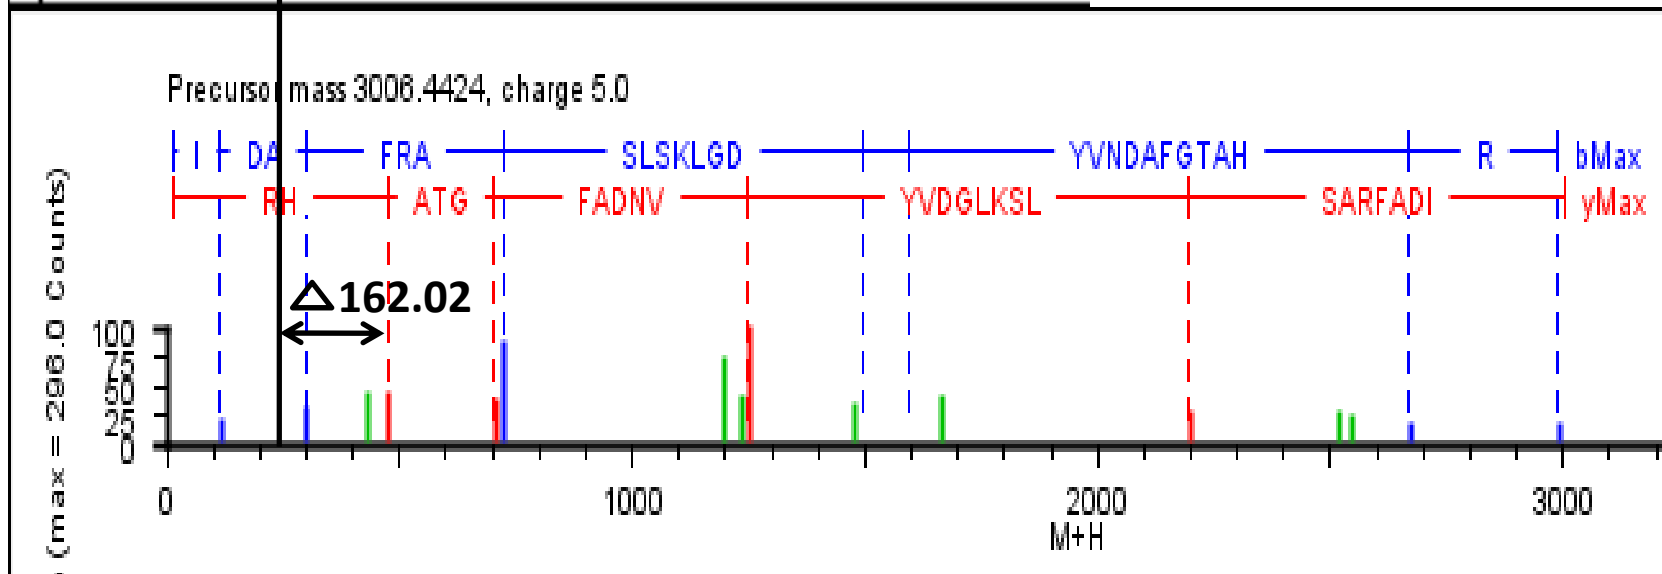

**474.1729:**  
**(312.1729**  
**+ 162.02)**

**157-171**

**(K)LGDVYVNDAFGTAHR(Gly)(A)**

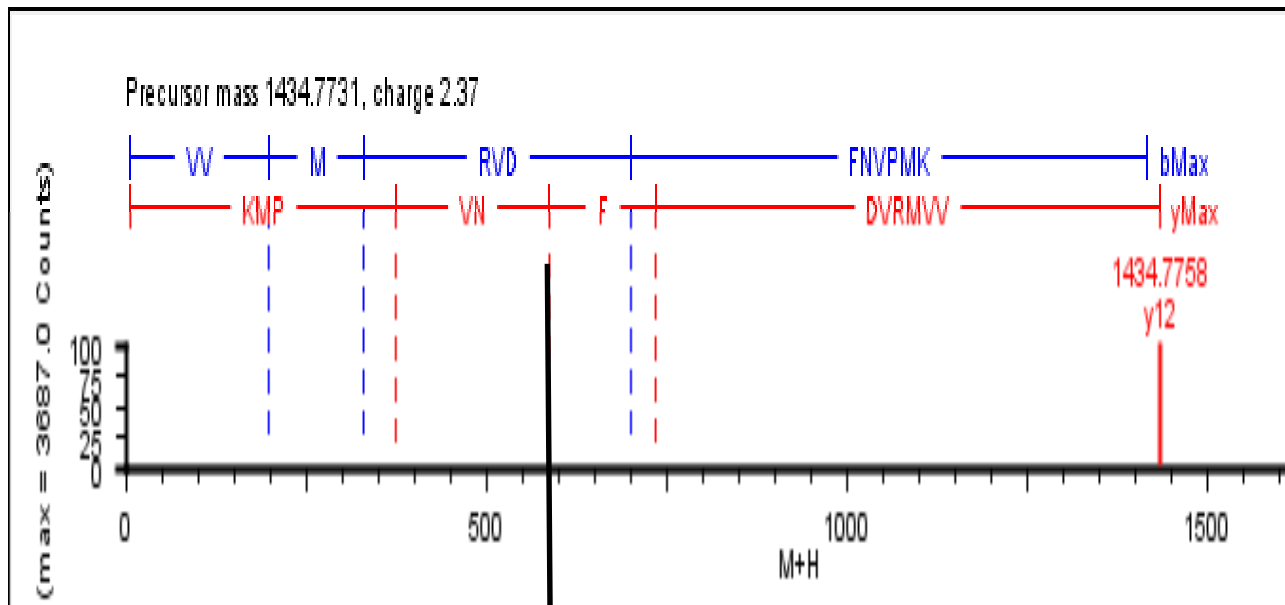

**588.2782**

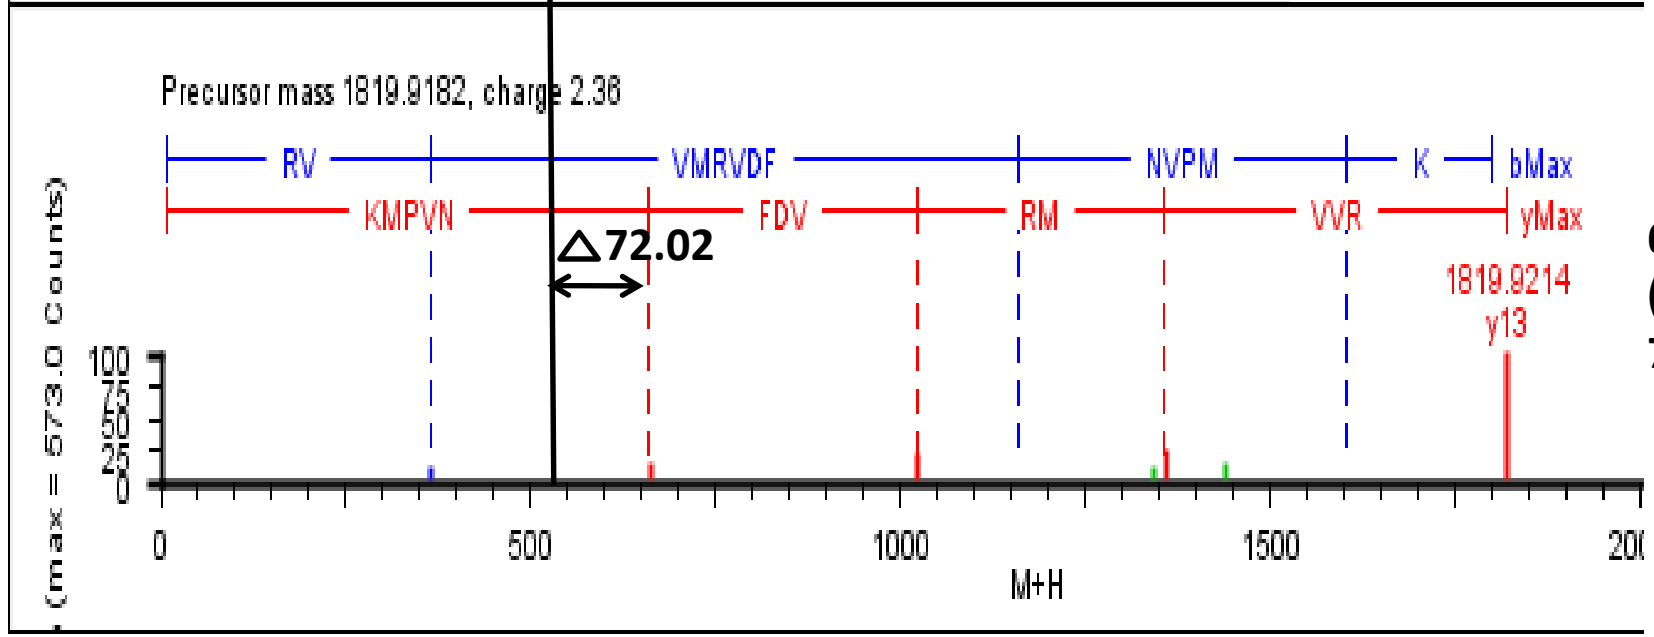

**660.3208:  
(588.27+  
72.02)**

**19-30**

**(R)VVMRVDFNVPMK(CEL)(N)**

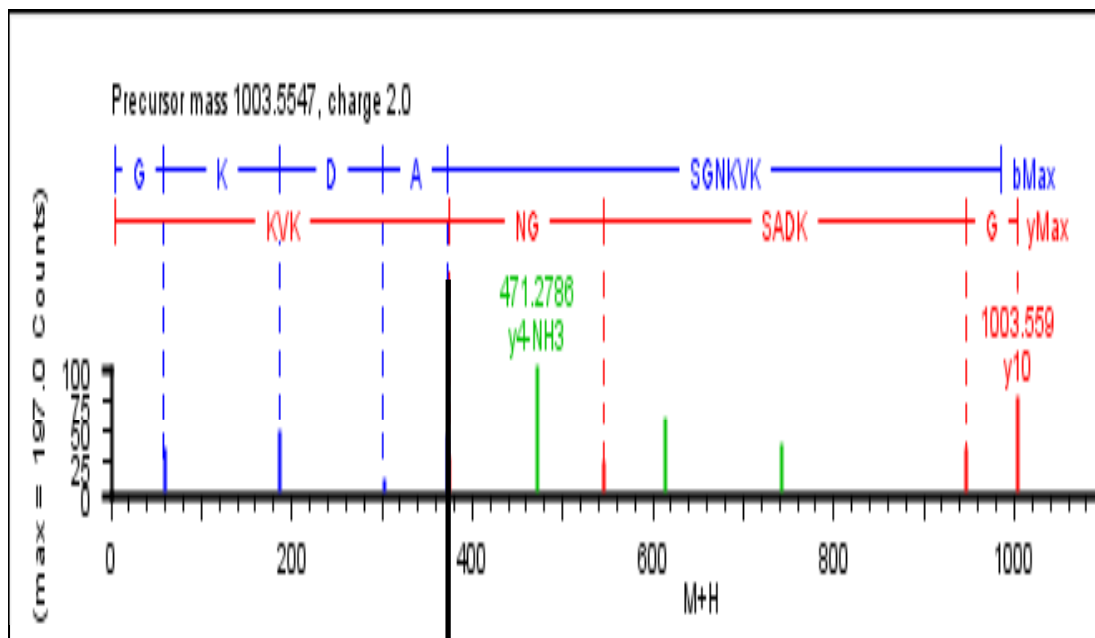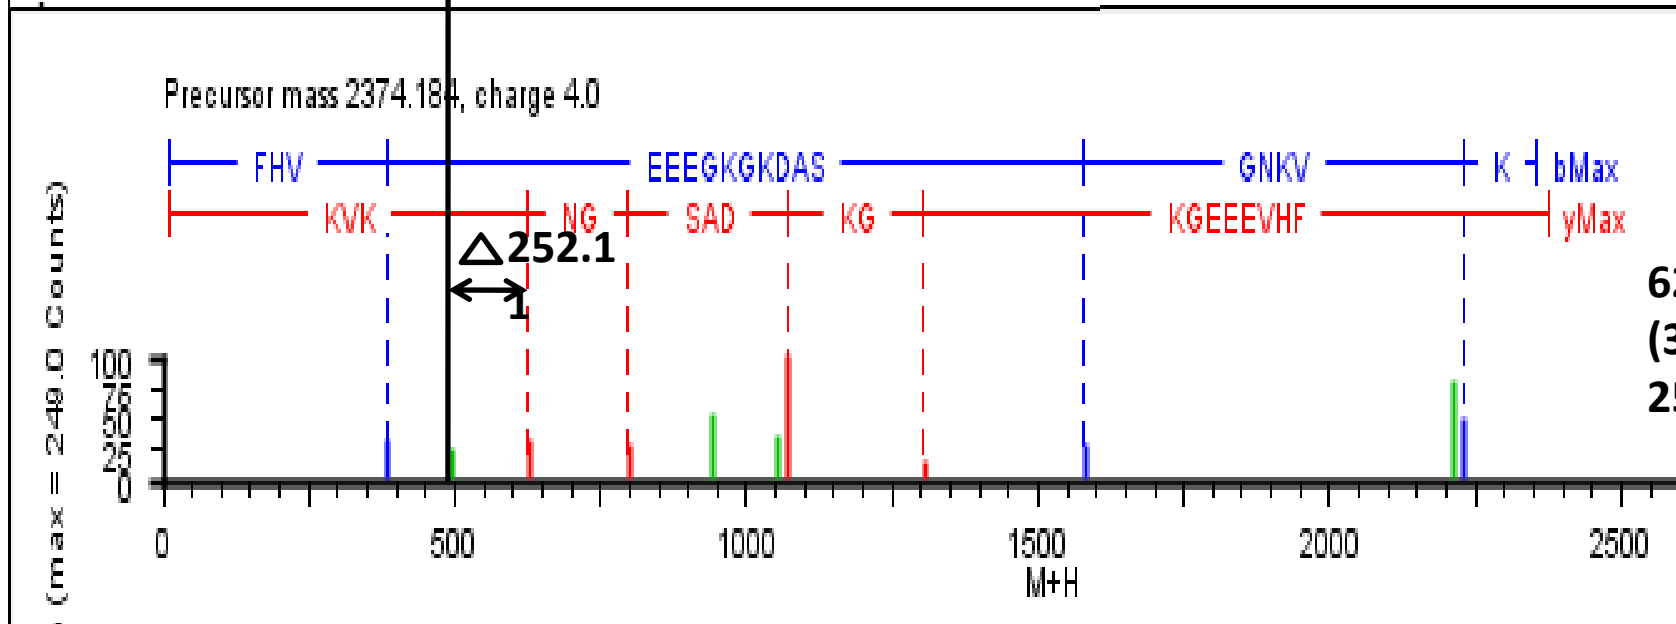

124-141

(R)FHV~~EEGKGDASGNK(Crossline)~~VK(A)

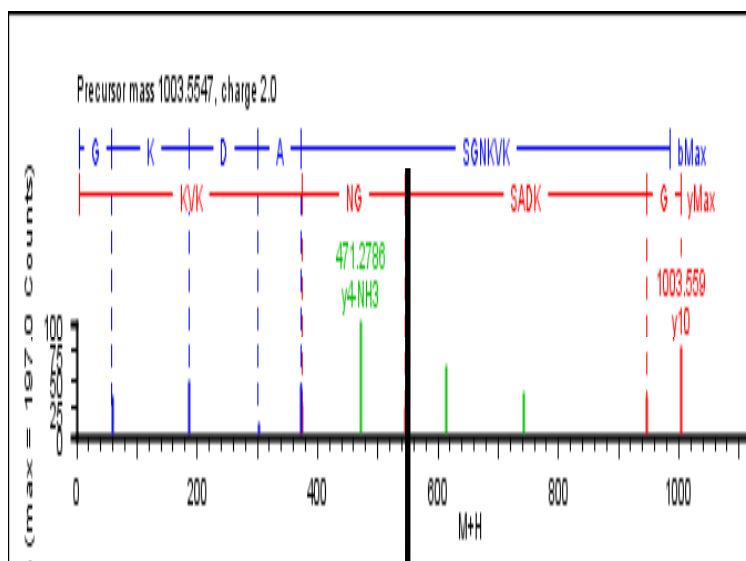

545.309

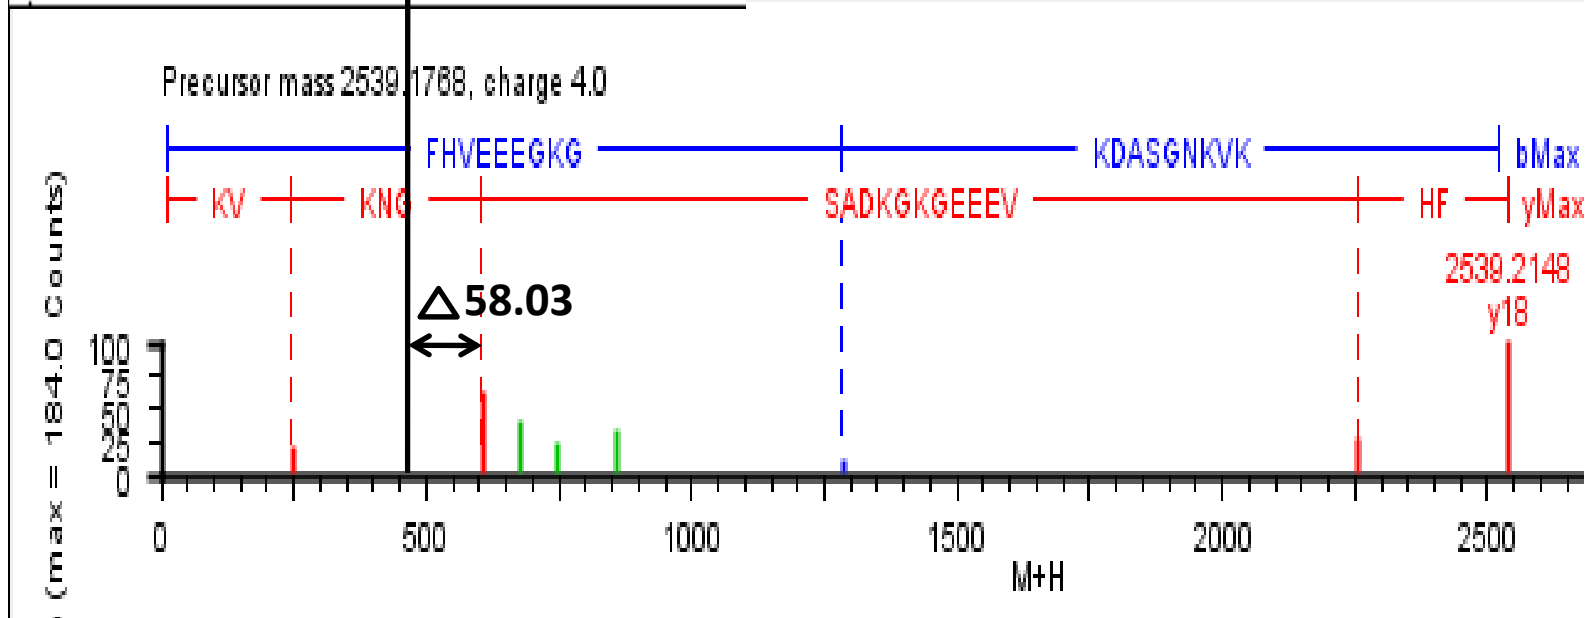

603.3259:  
(545.30+  
58.03)

124-141

(R)FHVEEEGKGDASGNK(Pento)VK(A)

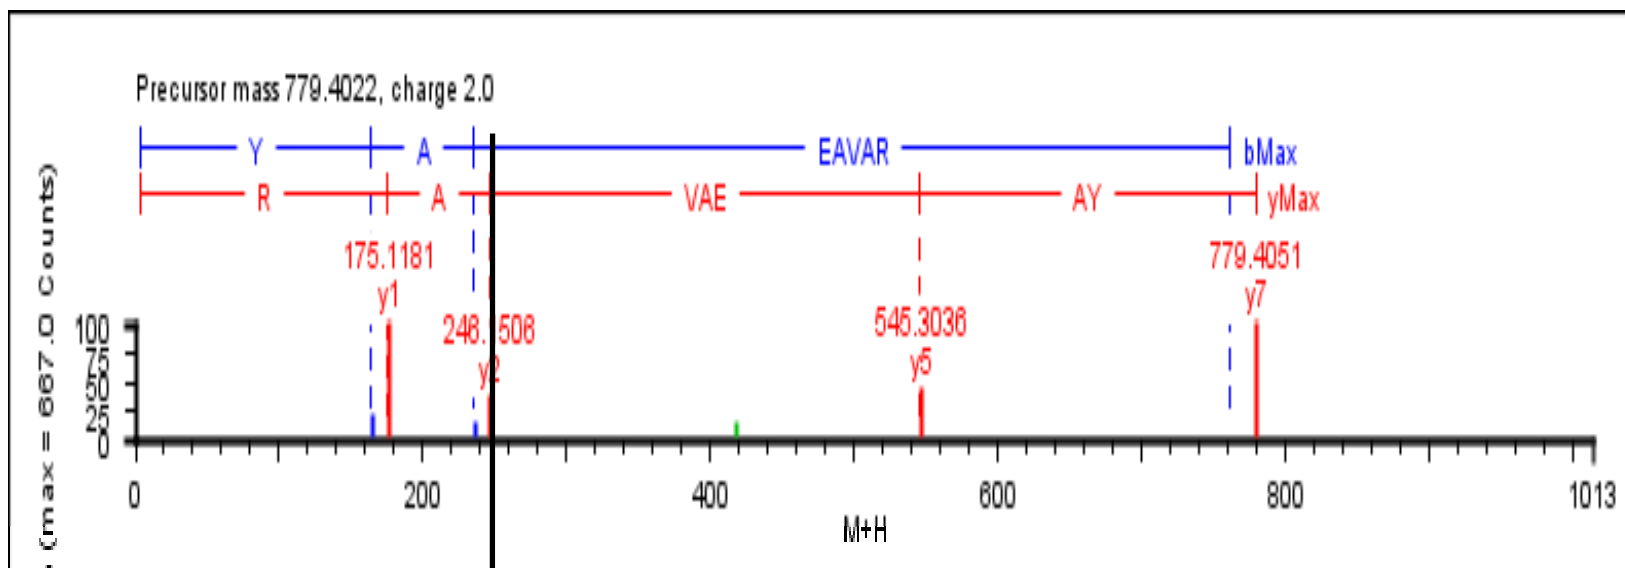

246.1506

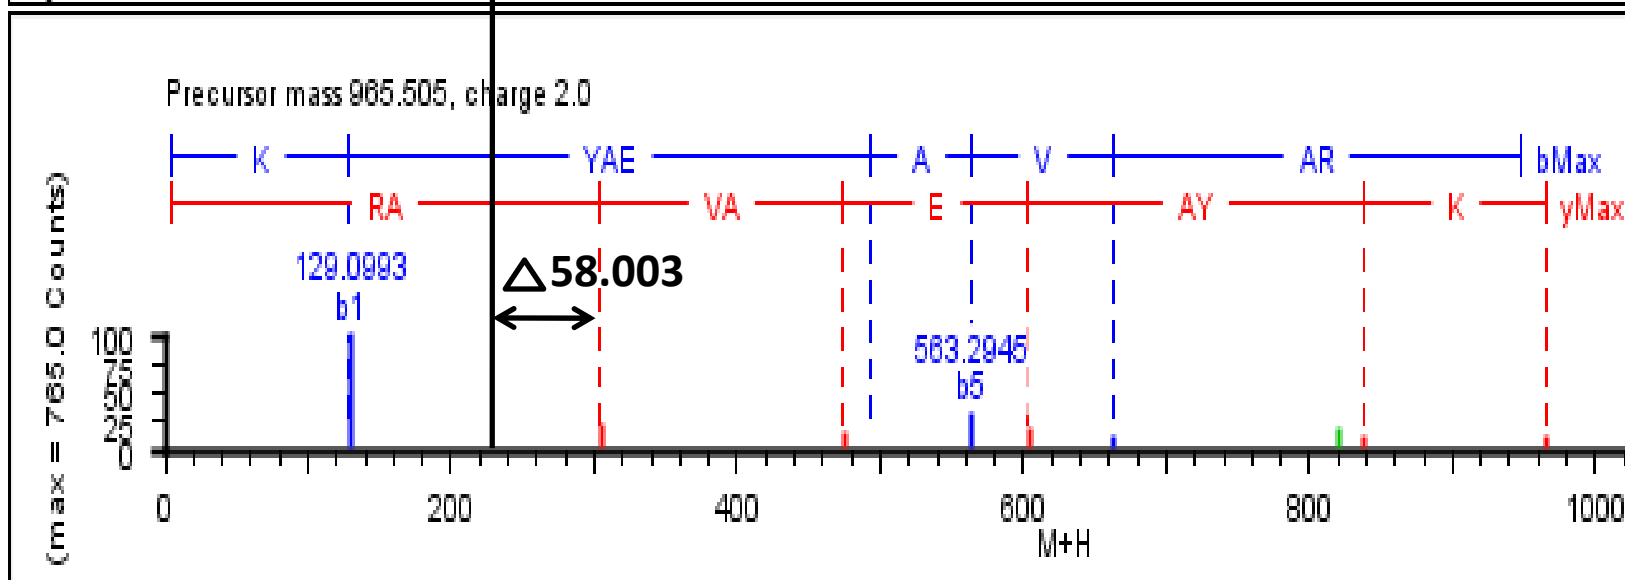

304.1746:  
(246.15+  
58.003)

324-330

(K)YAEAVAR(CML)(A)



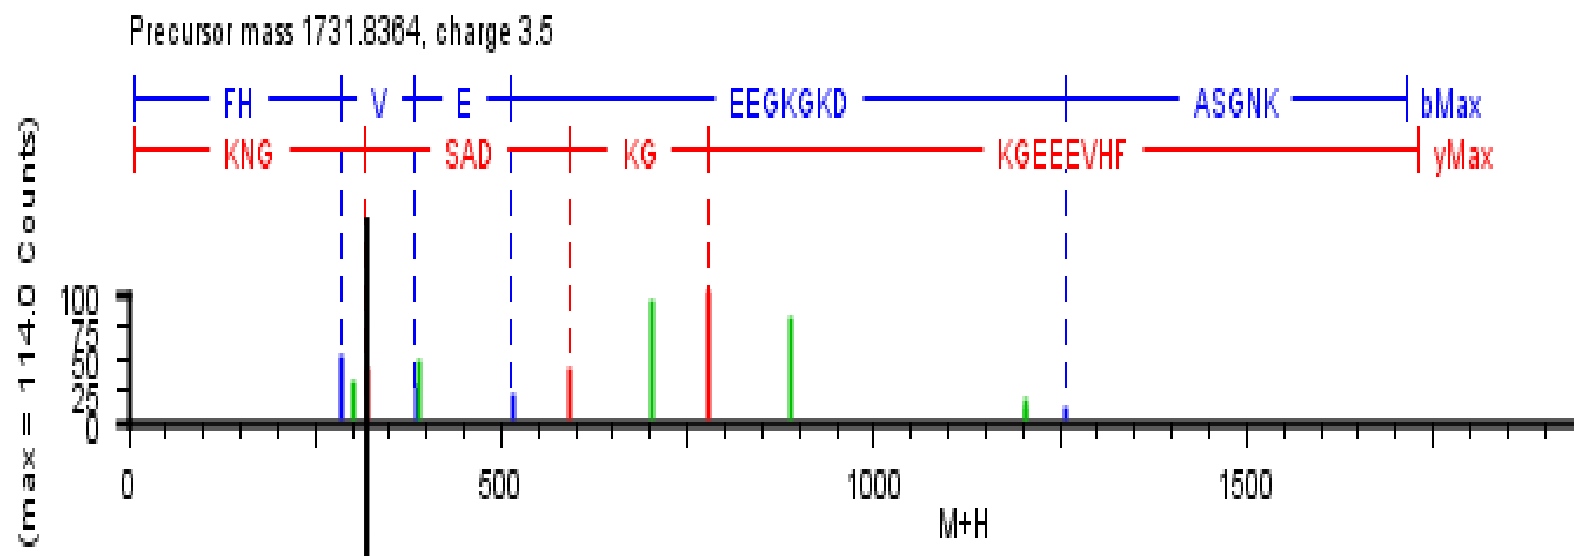

318.1321

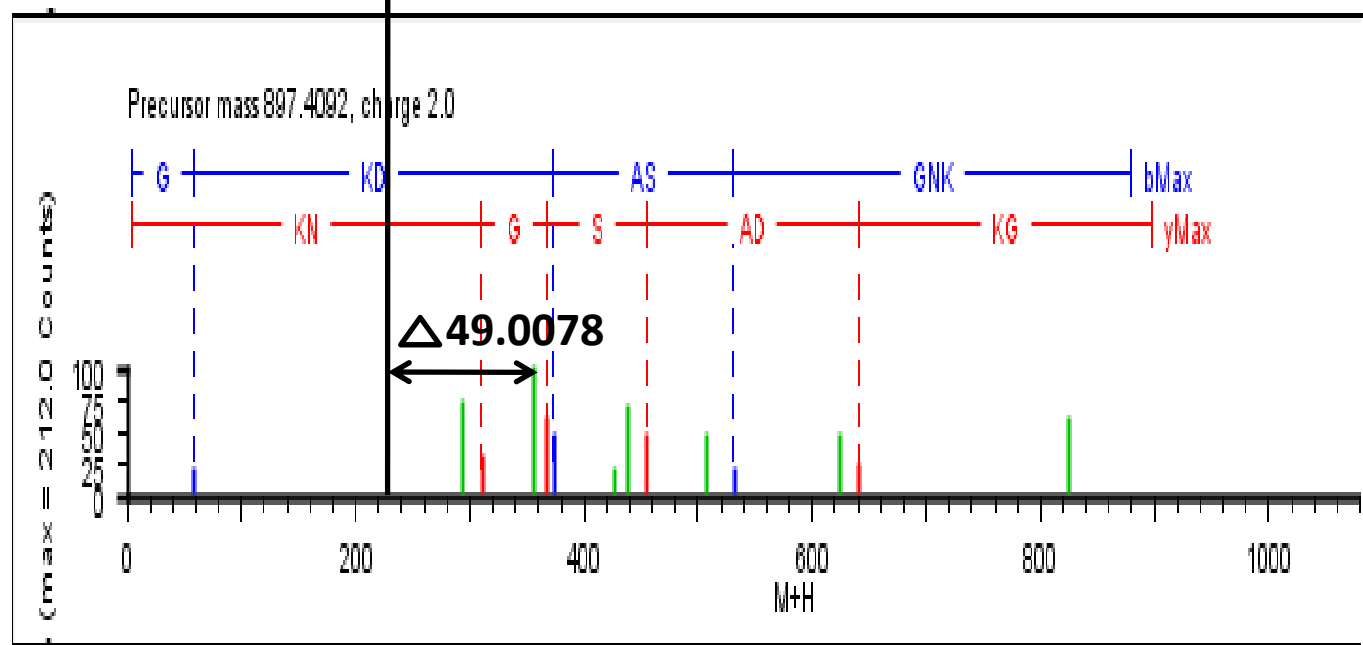

367.194

124-139

(R)FHVEEEGK(MOLD)GKDASGNK(V)

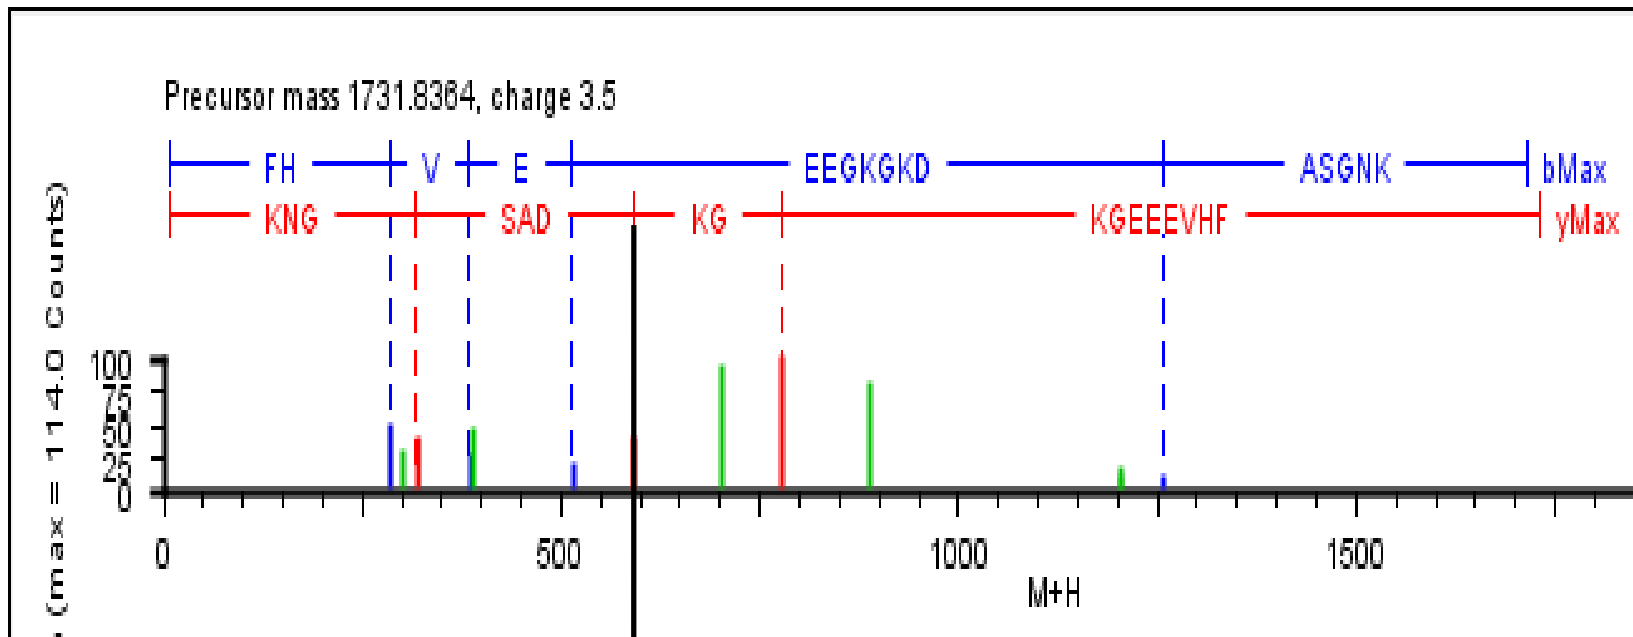

591.3358

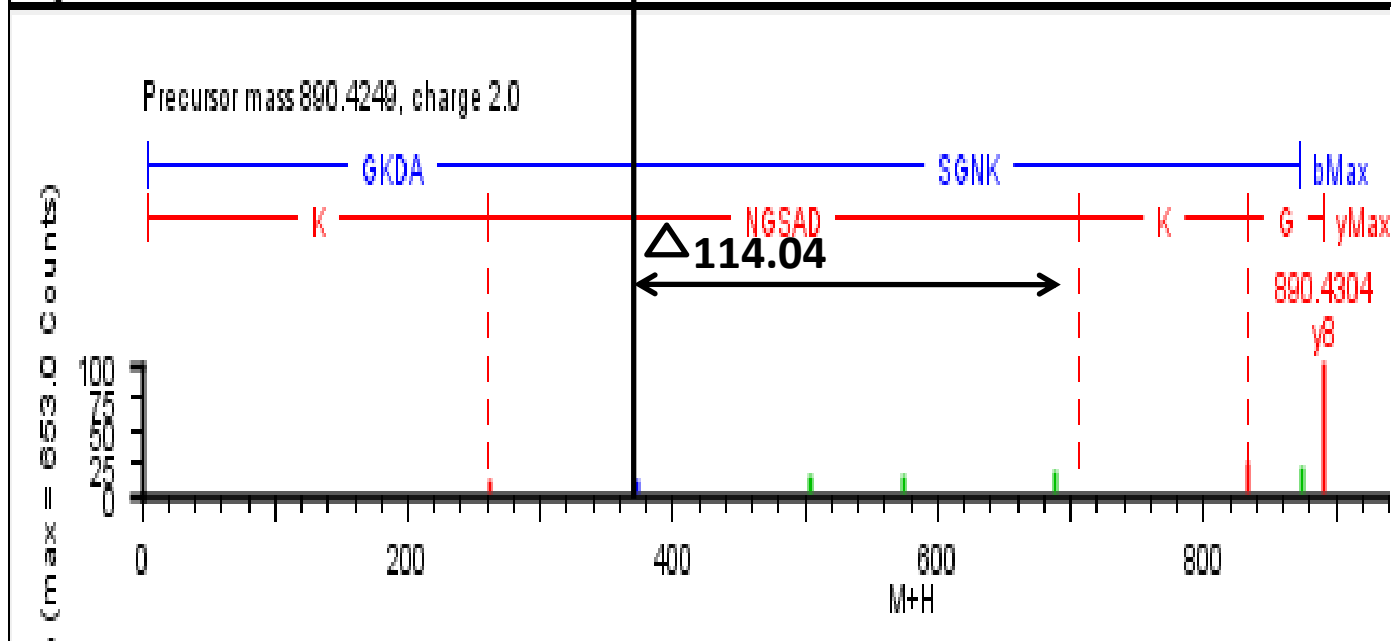

705.3616:  
(591.33+  
114.04)

124-139

(R)FHVEEEGK(Ubi)GKDASGNK(V)

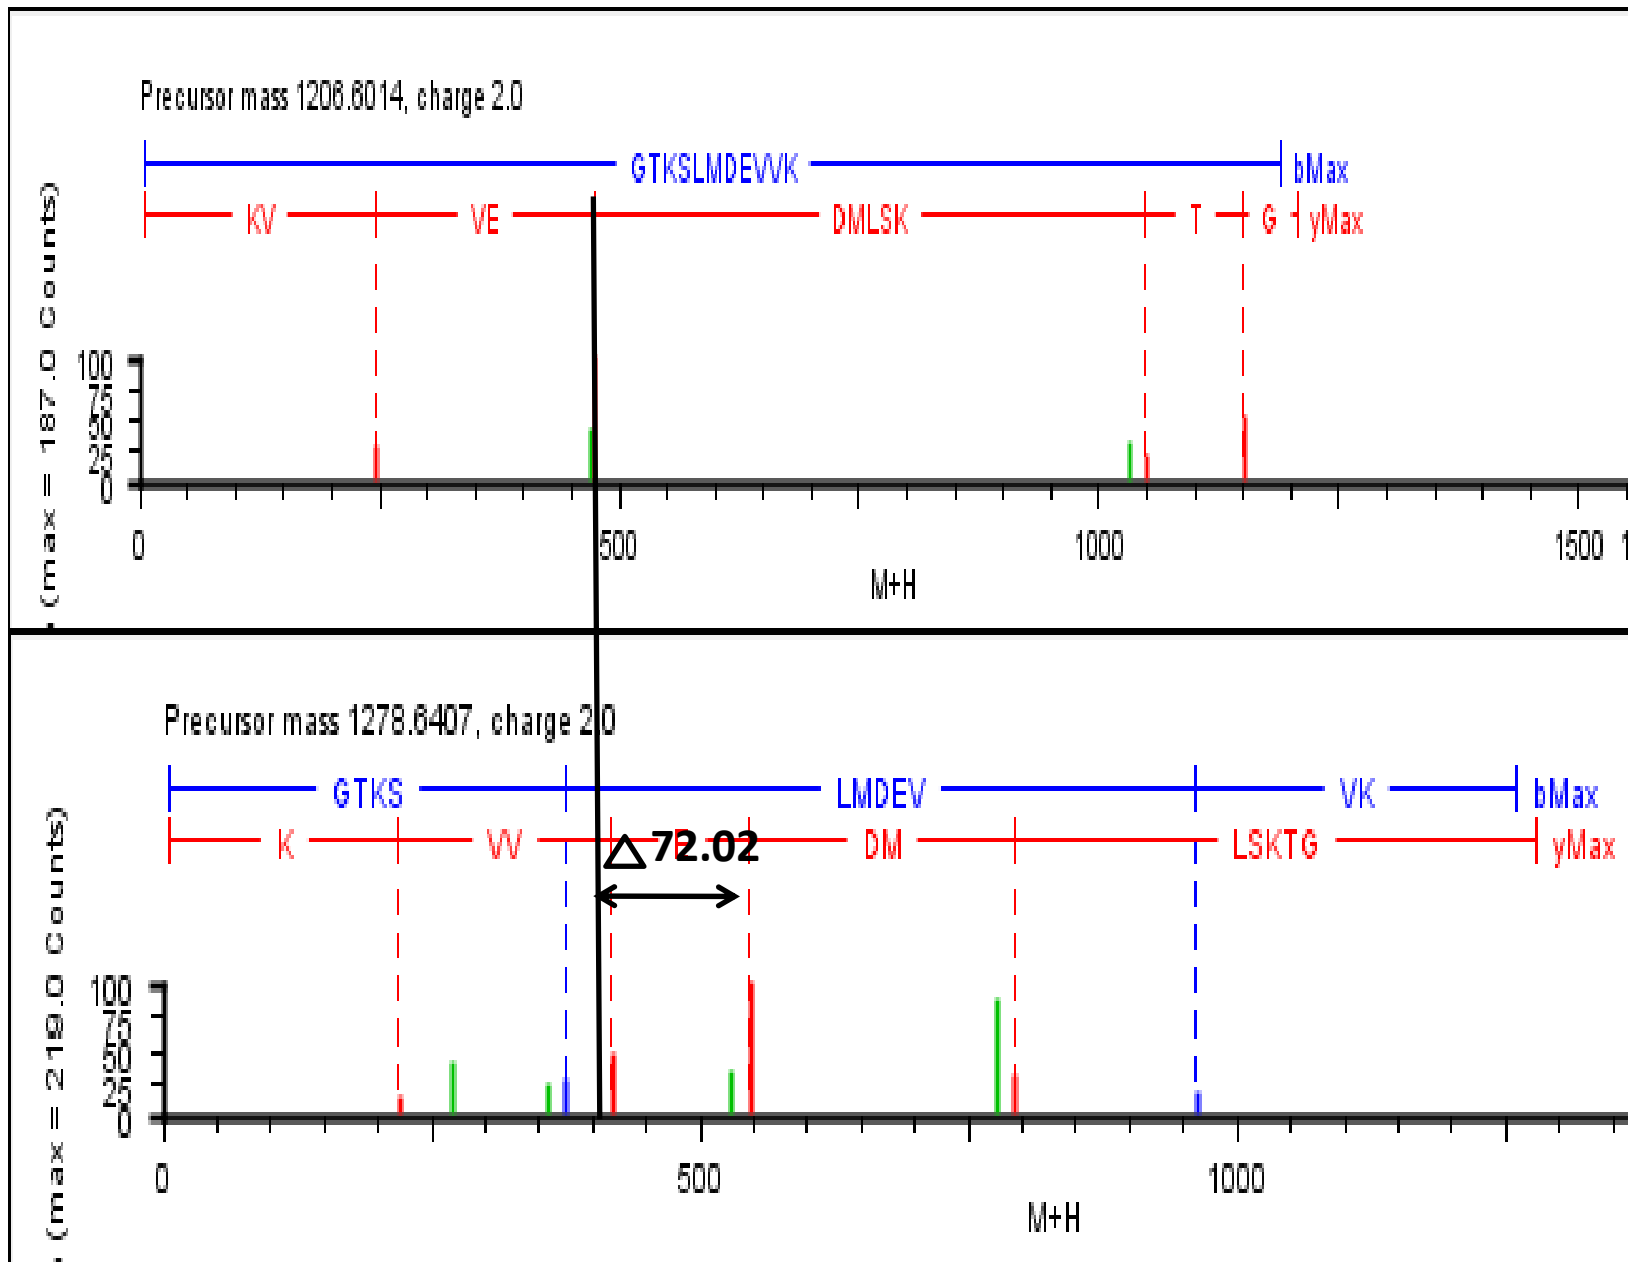

474.2409

546.271:  
(474.24+  
72.02)

351-361

(R)GTKSLMDEVV**K**(CEL)(A)

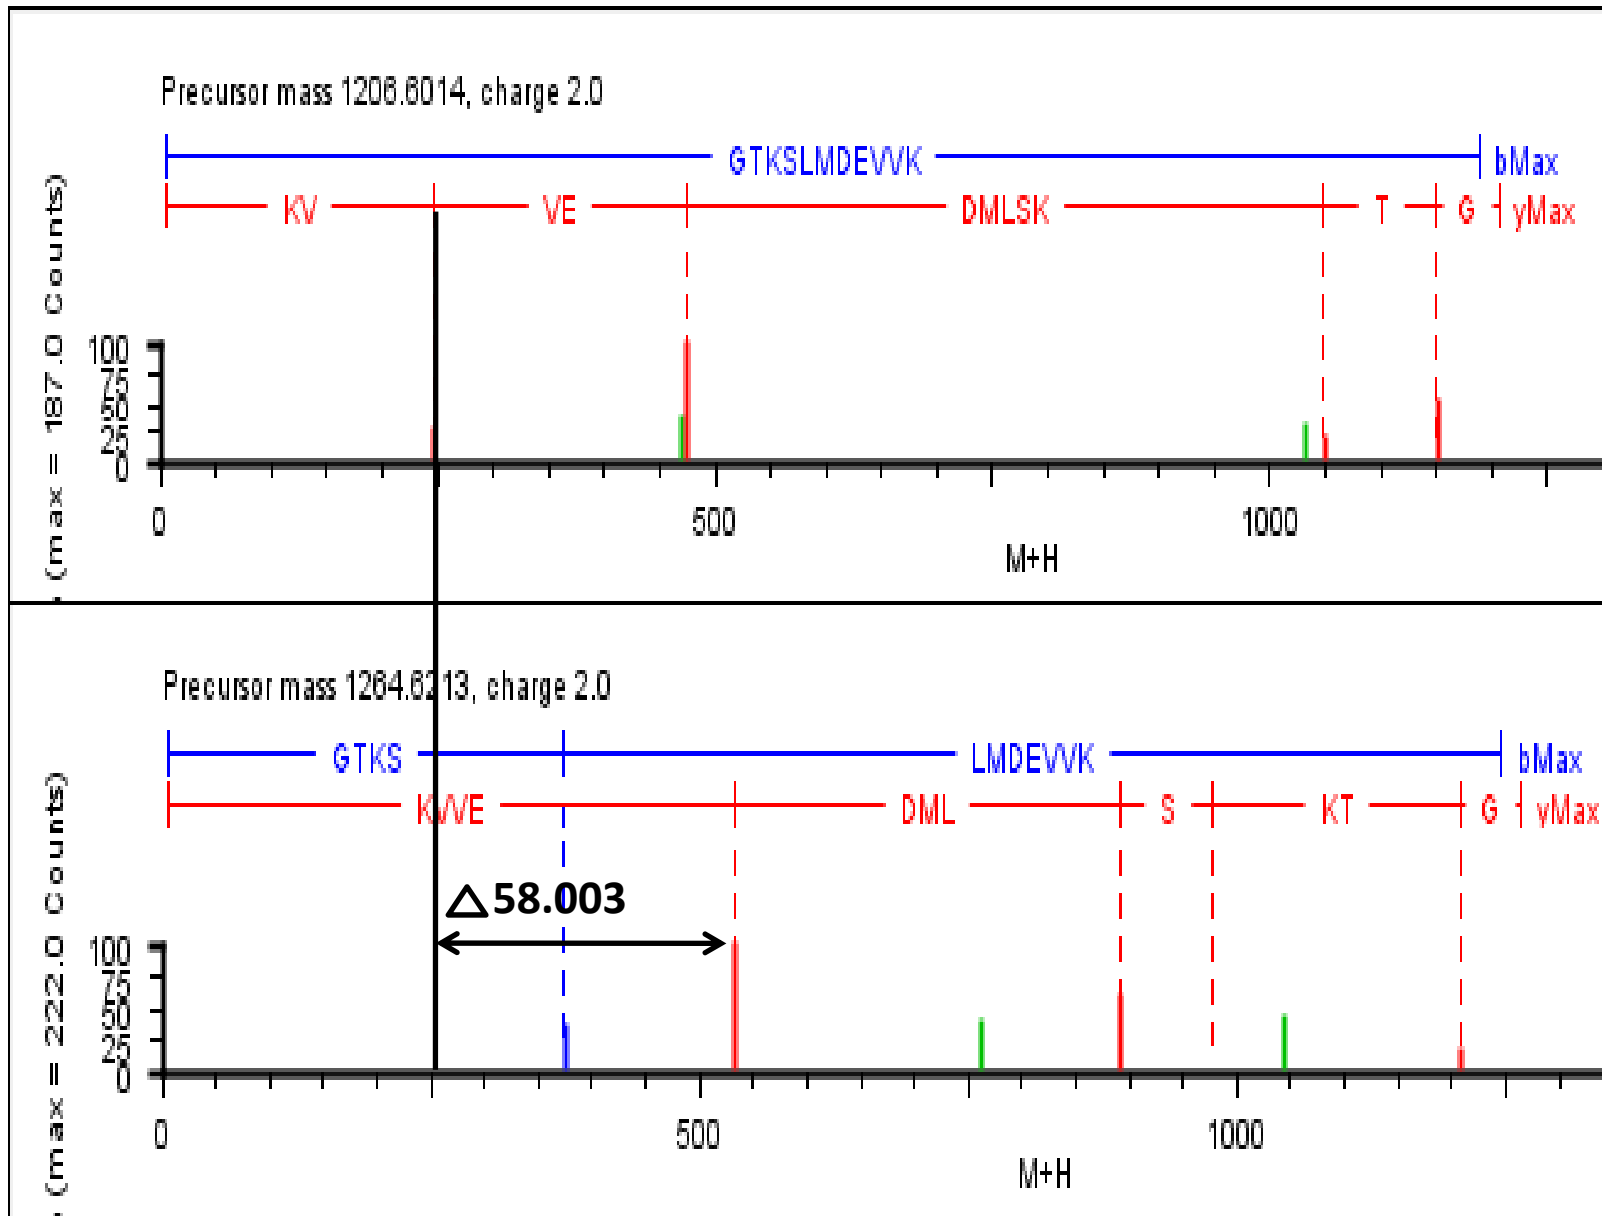

474.2409

532.263:  
(474.2409  
+ 58.003)

351-361

(R)GTKSLMDEVVK(CML)(A)

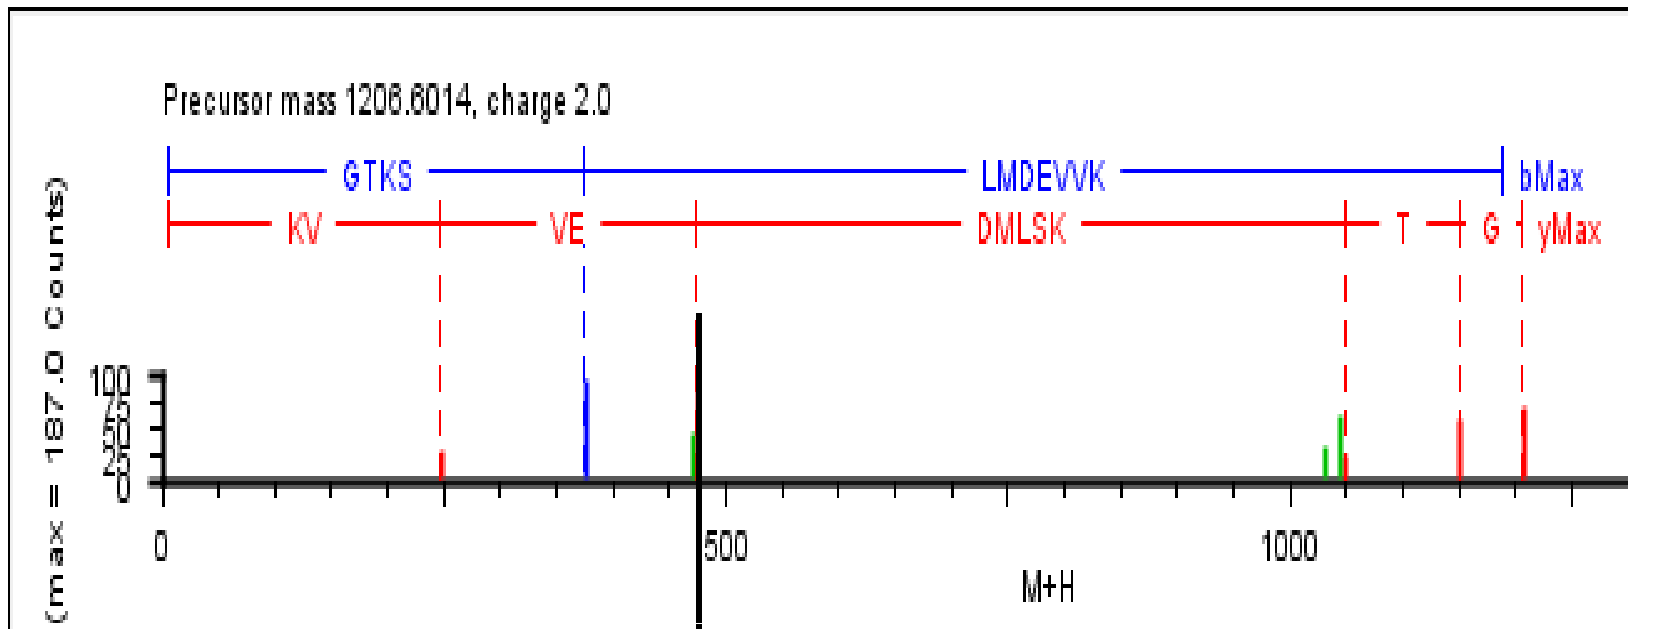

**1149.5447**

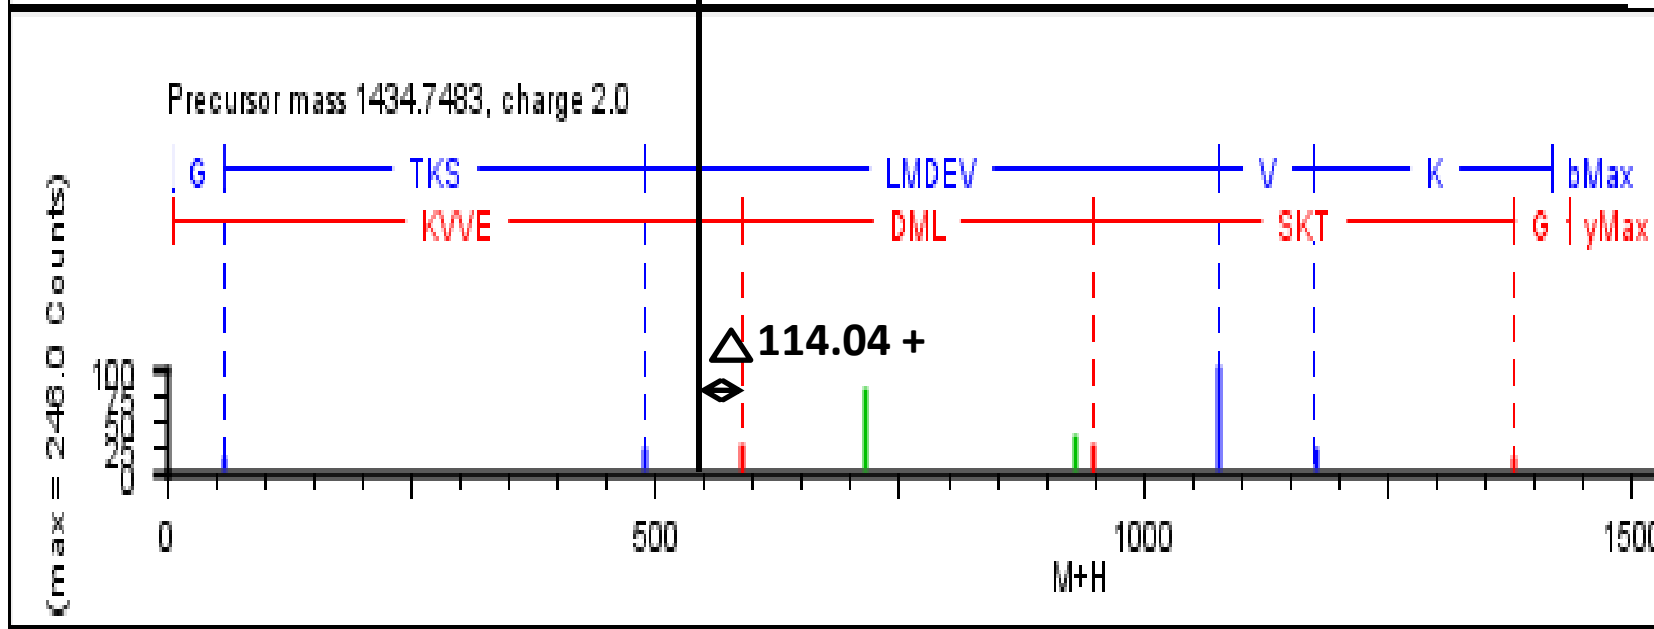

**1377.6901:**  
**(1149.54+**  
**114.04)**

**351-361**

**(R)GTK(Ubi)SLMDEVVK(Ubi)(A)**

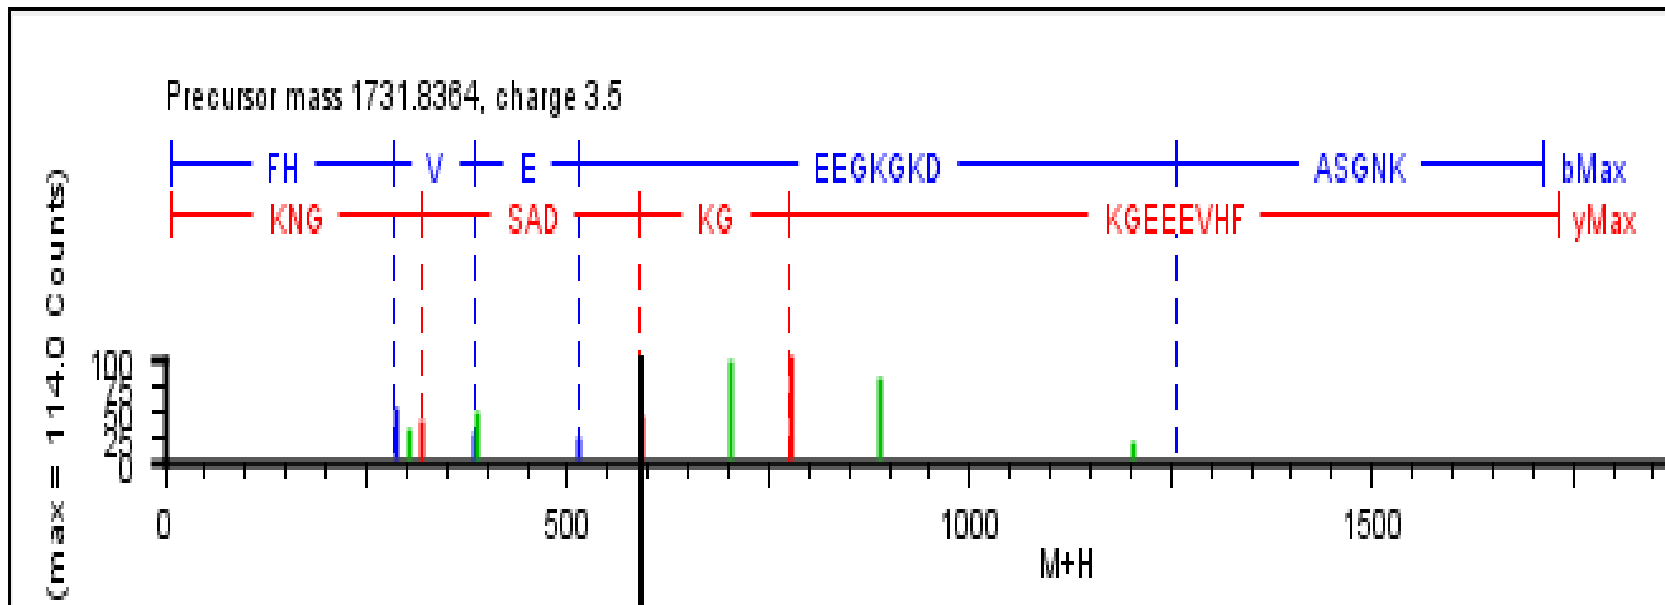

591.3356

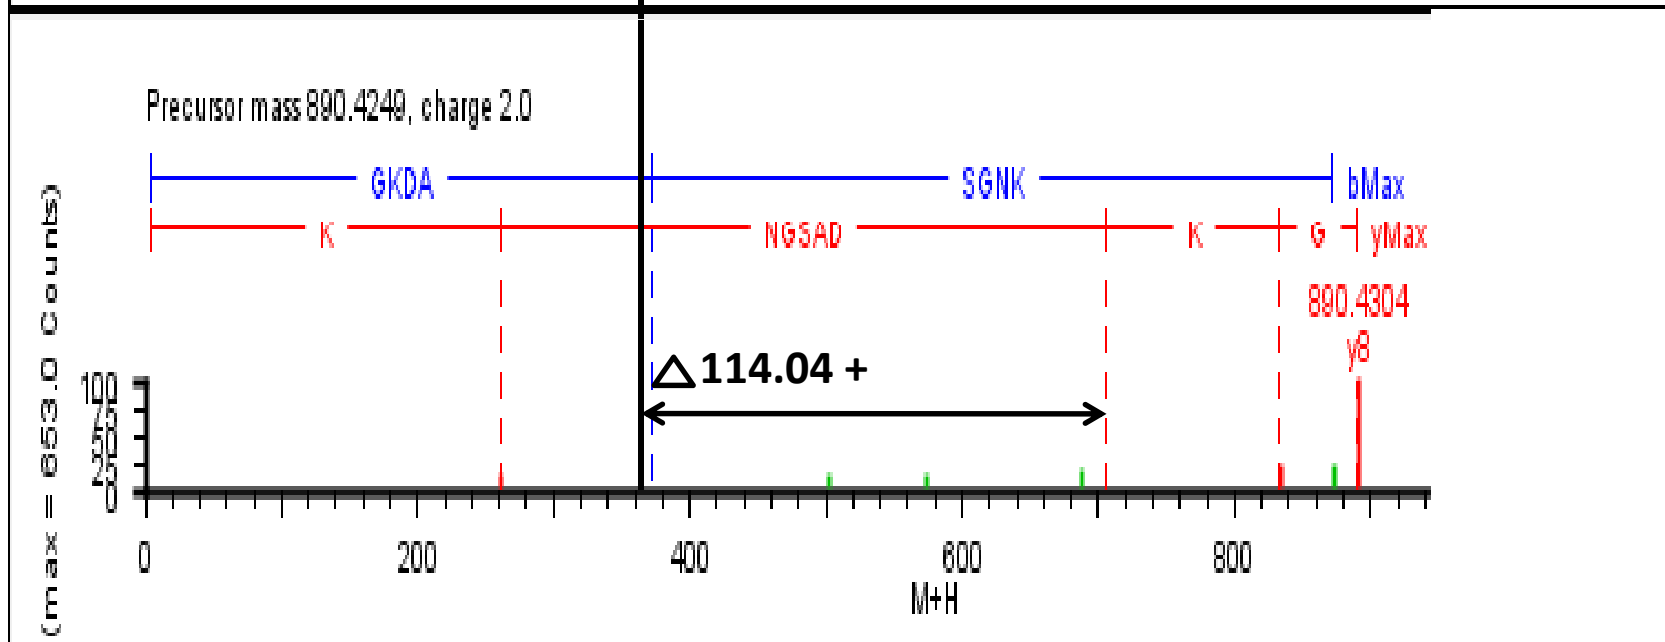

705.3616:  
(591.33+  
114.04)

132-139

(K)GKDASGNK(Ubi)(V)

LDH

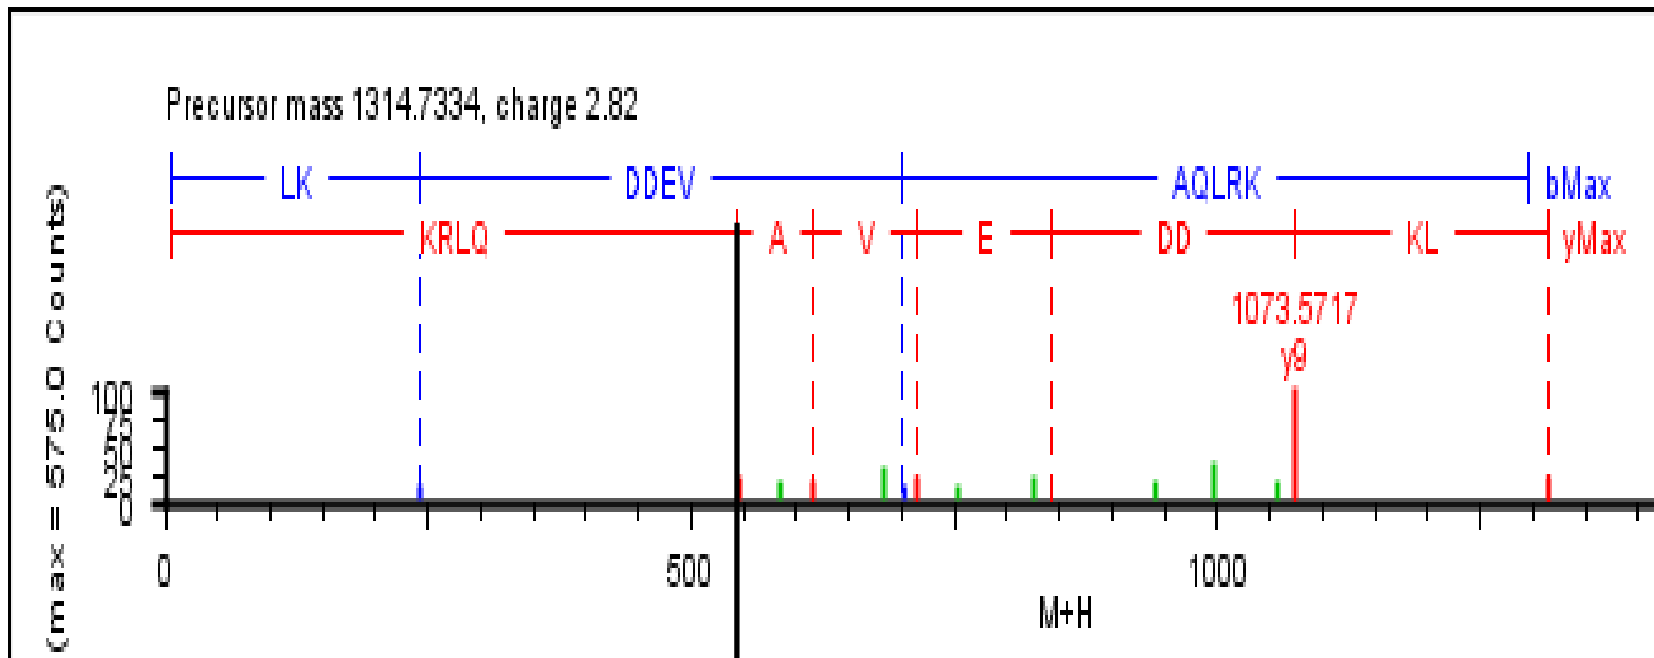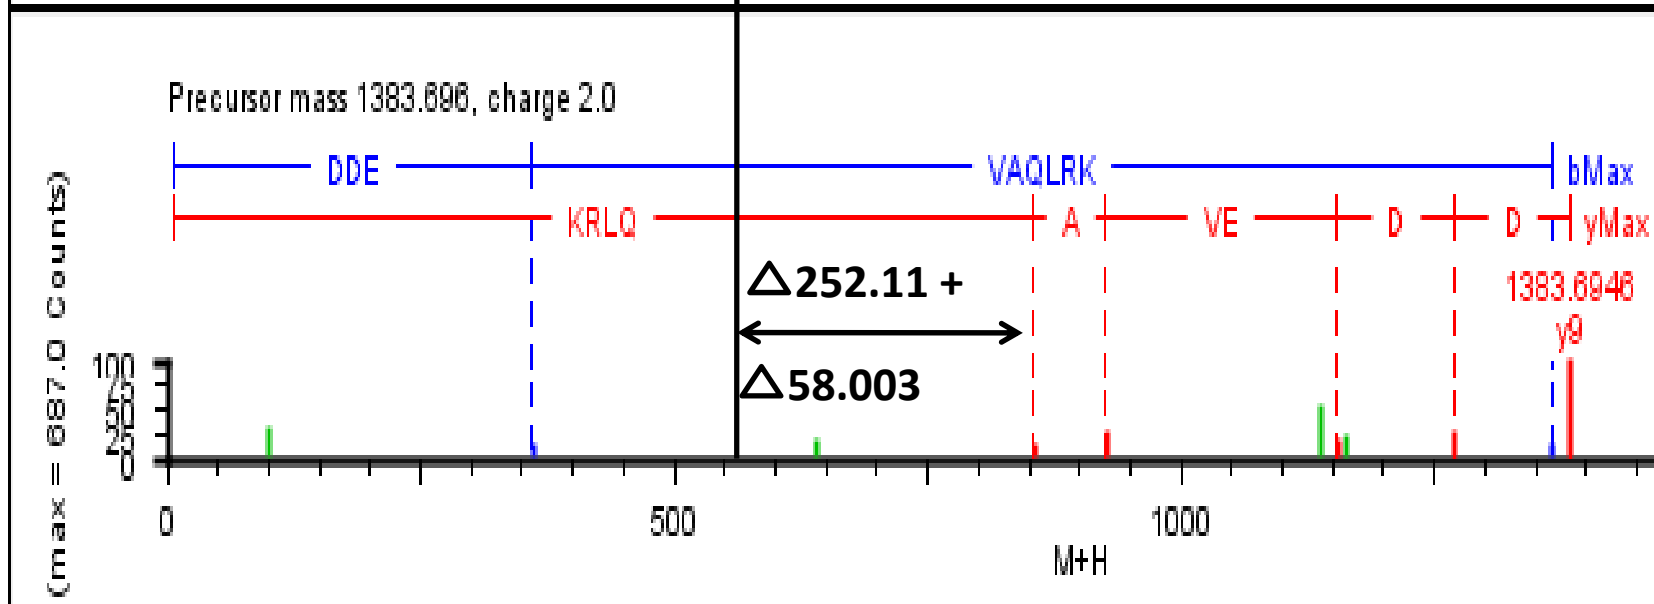

309-319

(K)LKDDEVAQLR(Crossline)K(CML)(S)



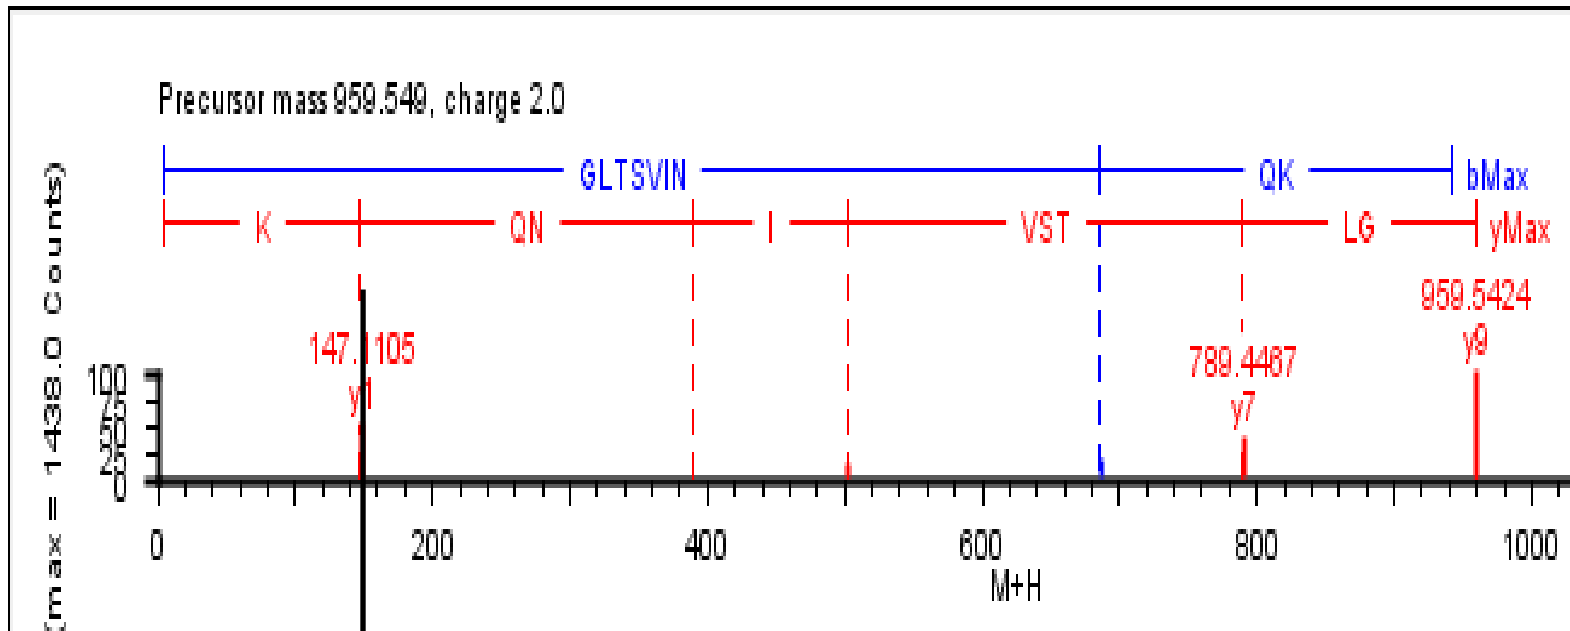

147.1105

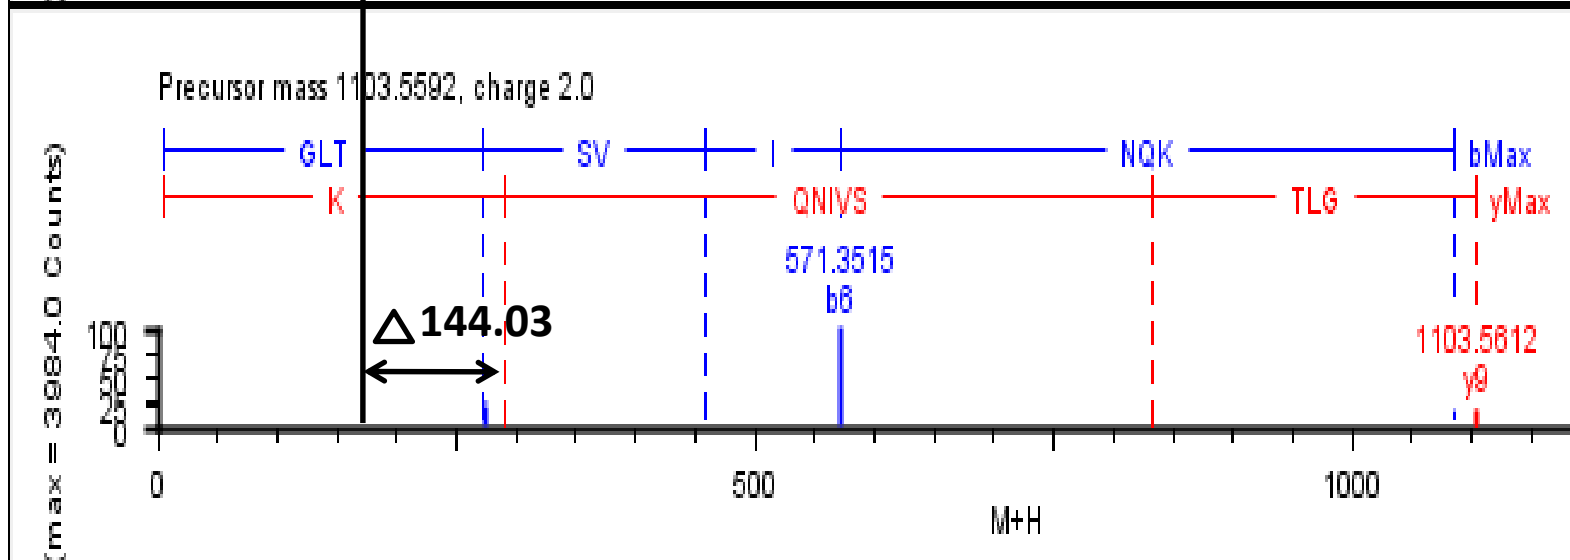

291.156:  
(147.11+  
144.03)

300-308

(R)GLTSVINQK(LmiA)(L)

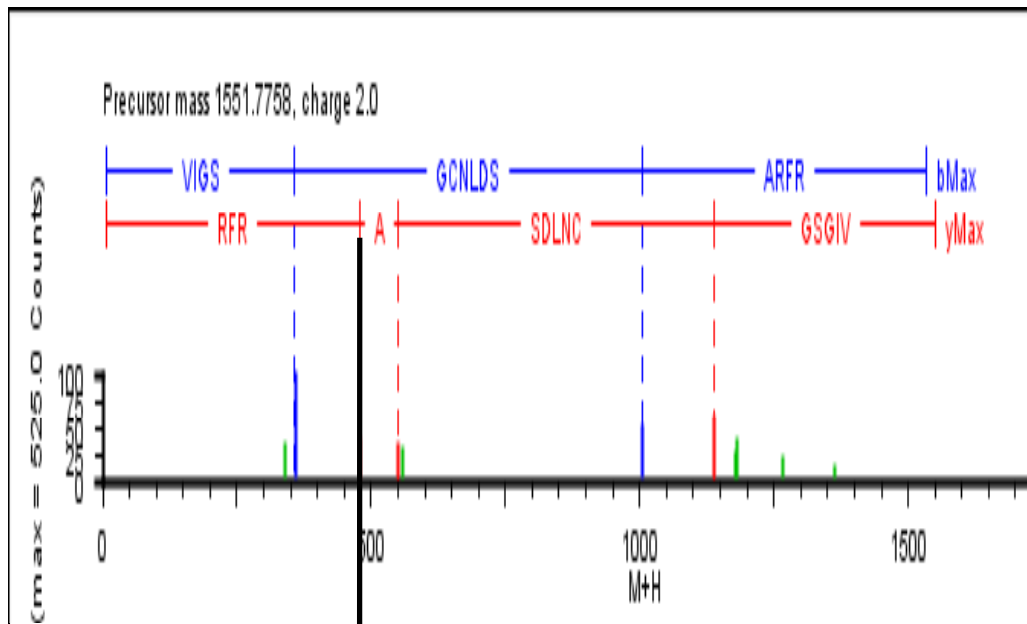

**478.2678**

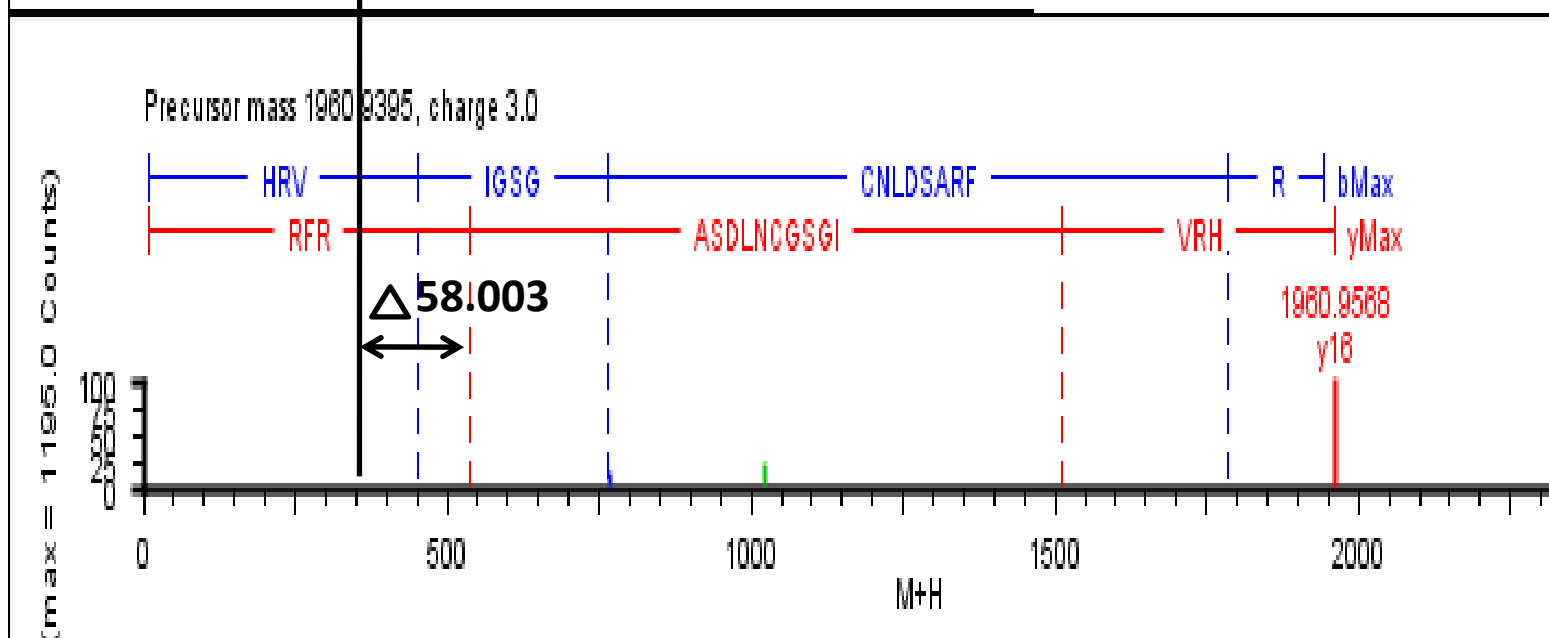

**536.3219:**  
**(478.29+**  
**58.003)**

**159-172**

**(R)VIGSGCNLDSARFR(CML)(Y)**

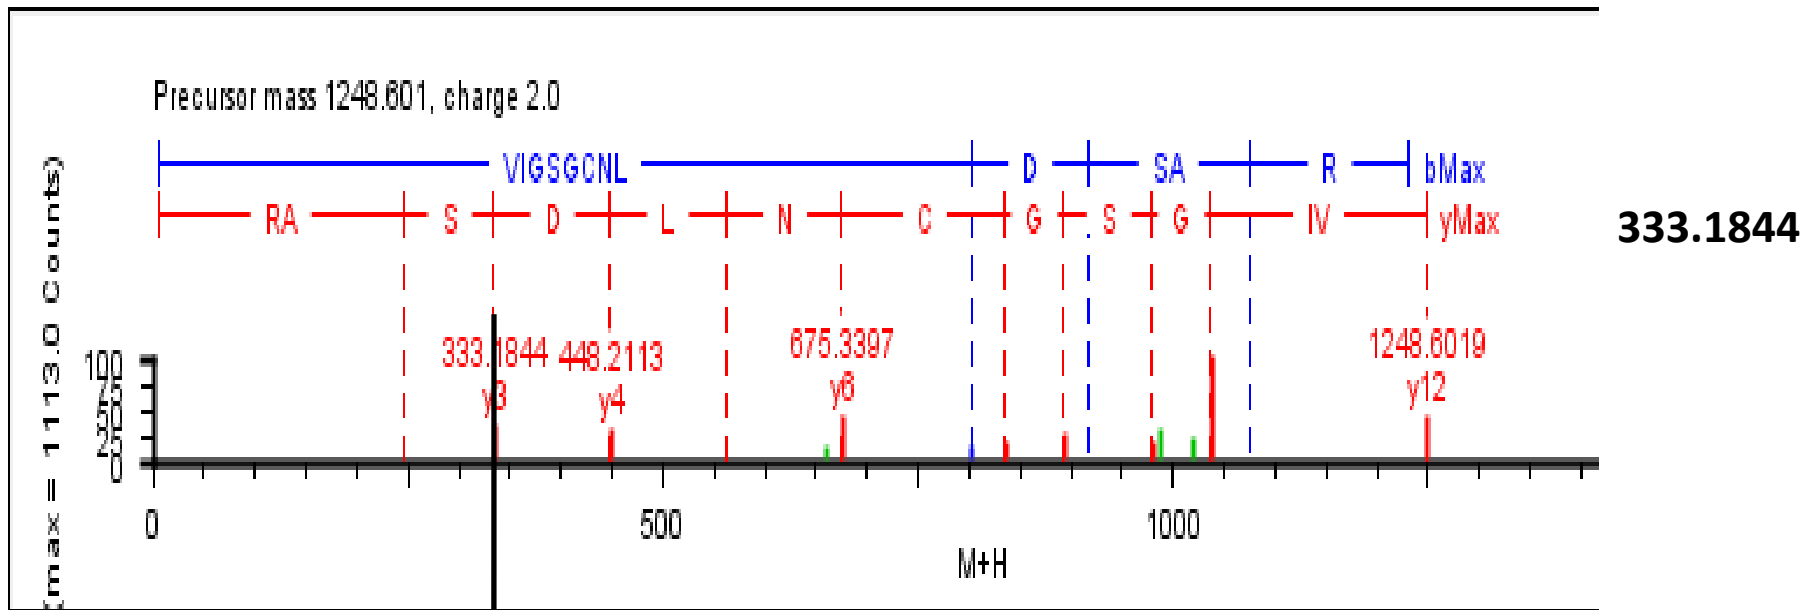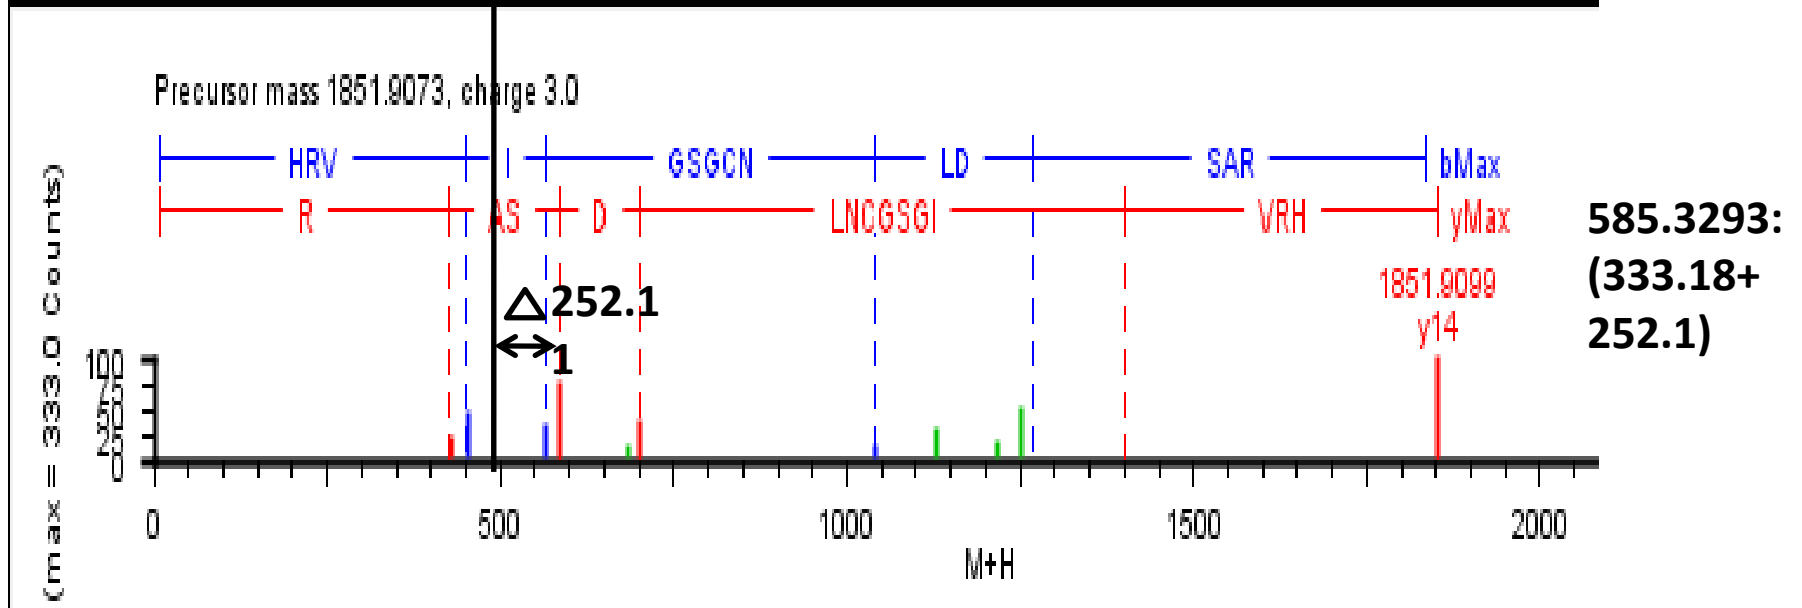

159-170

(K)HRVIGSGCNLDSAR(Crossline)(F)

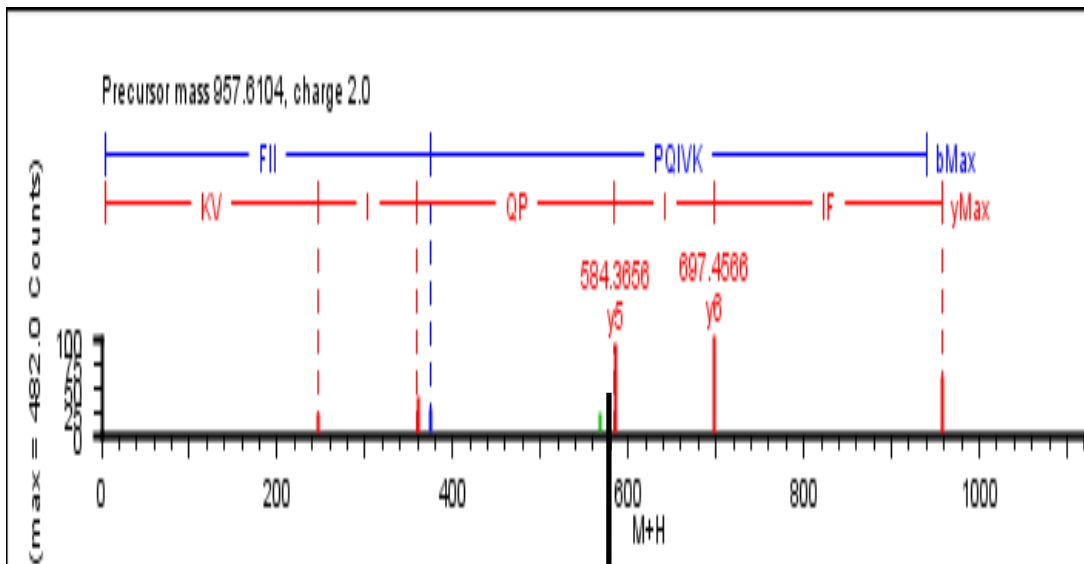

584.3656

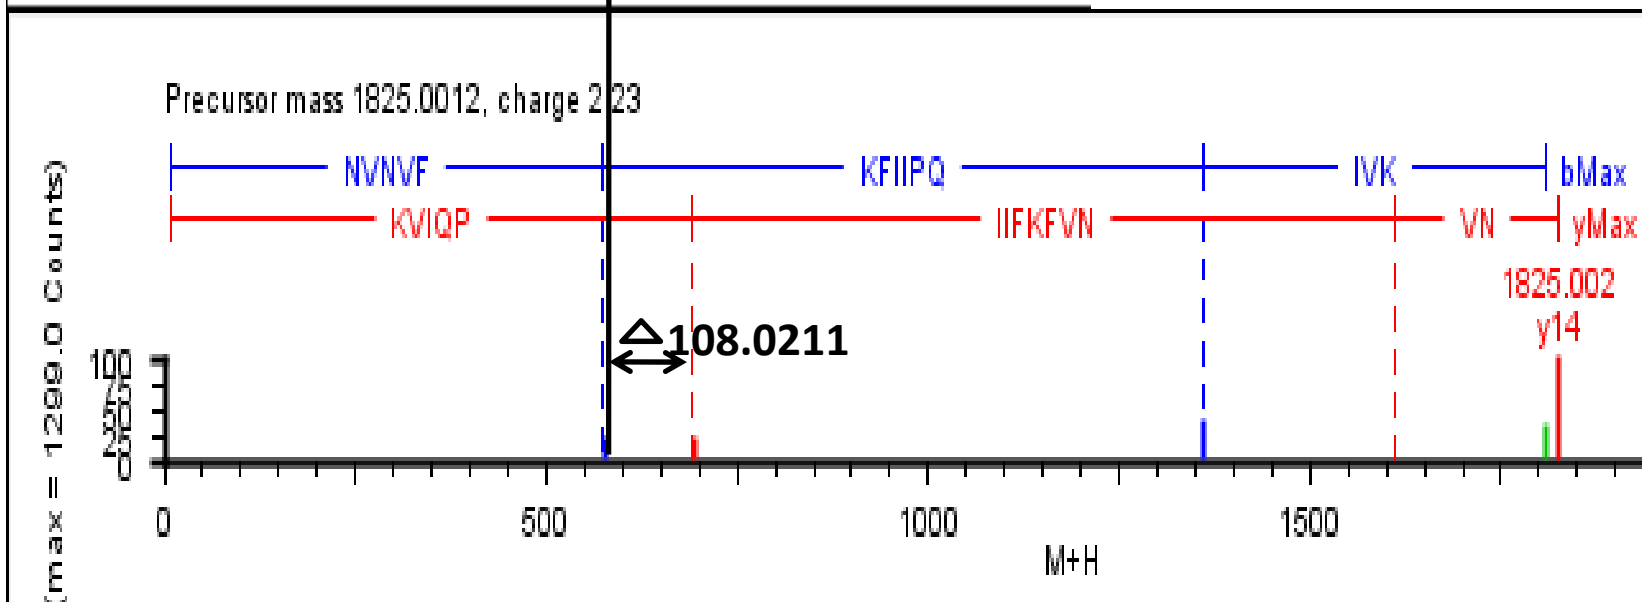

692.3466:  
(584.36+  
108.02)

120-127

(R)NVNVFKFIIPQIVK(Pyr)(Y)

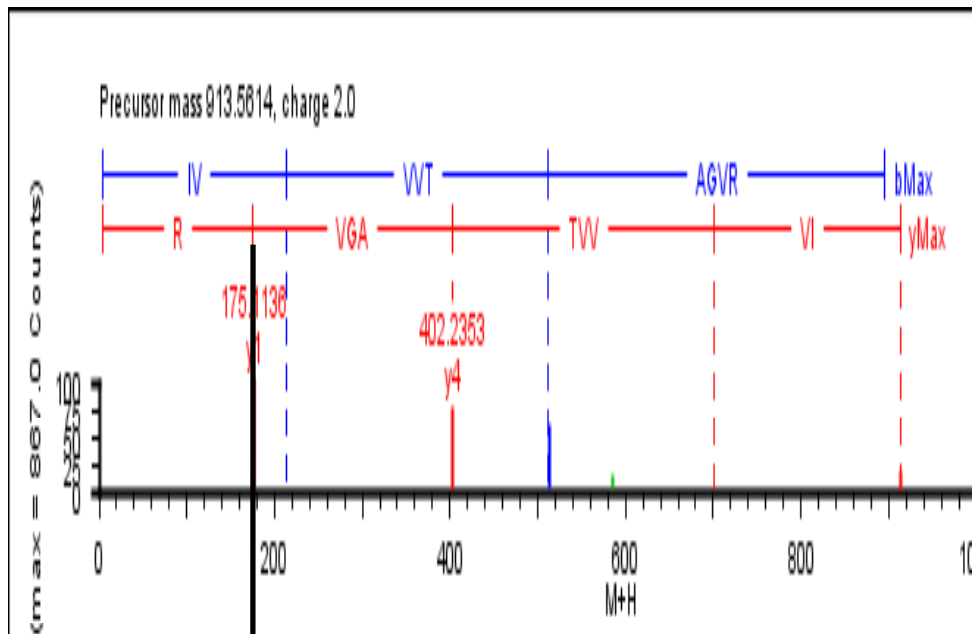

175.1136

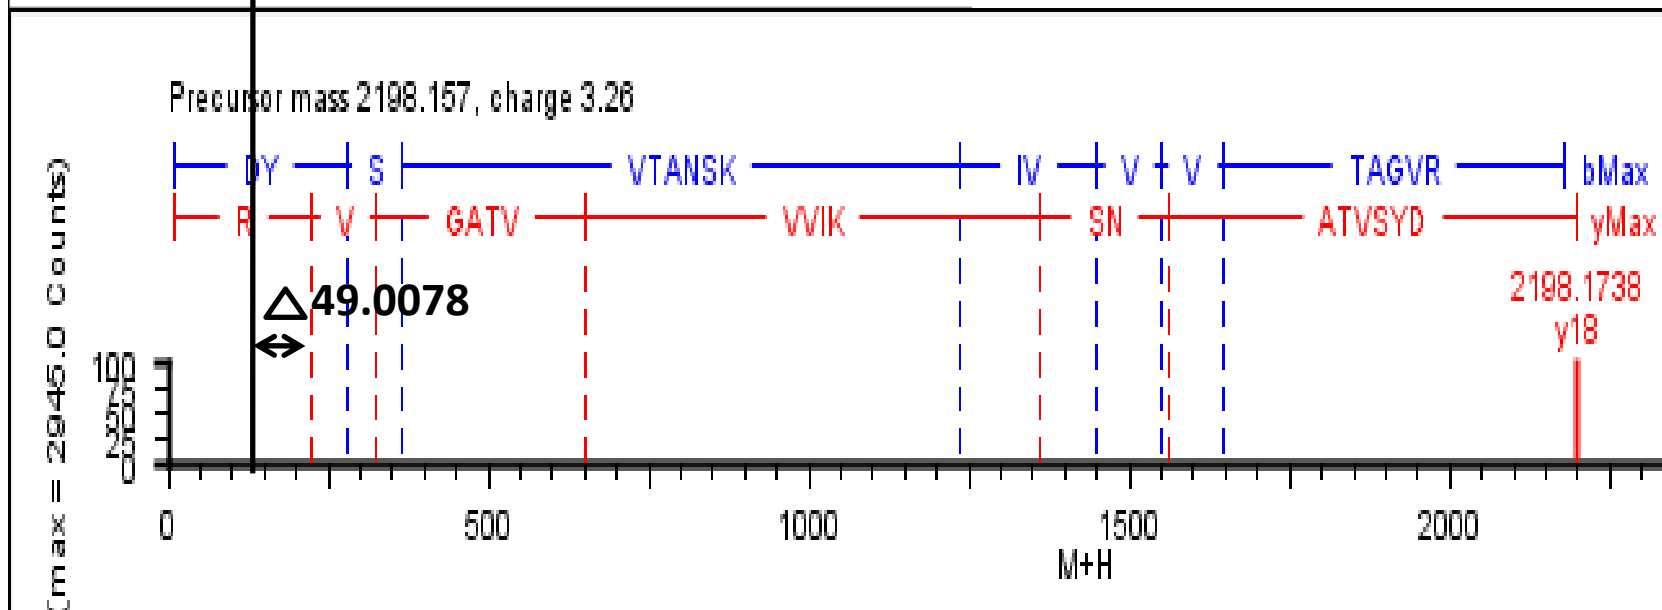

224.1228:  
(175.11+  
49.00)

83-100

(K)DYSVTANSKIVVVVTAGVR(MOLD)(Q)

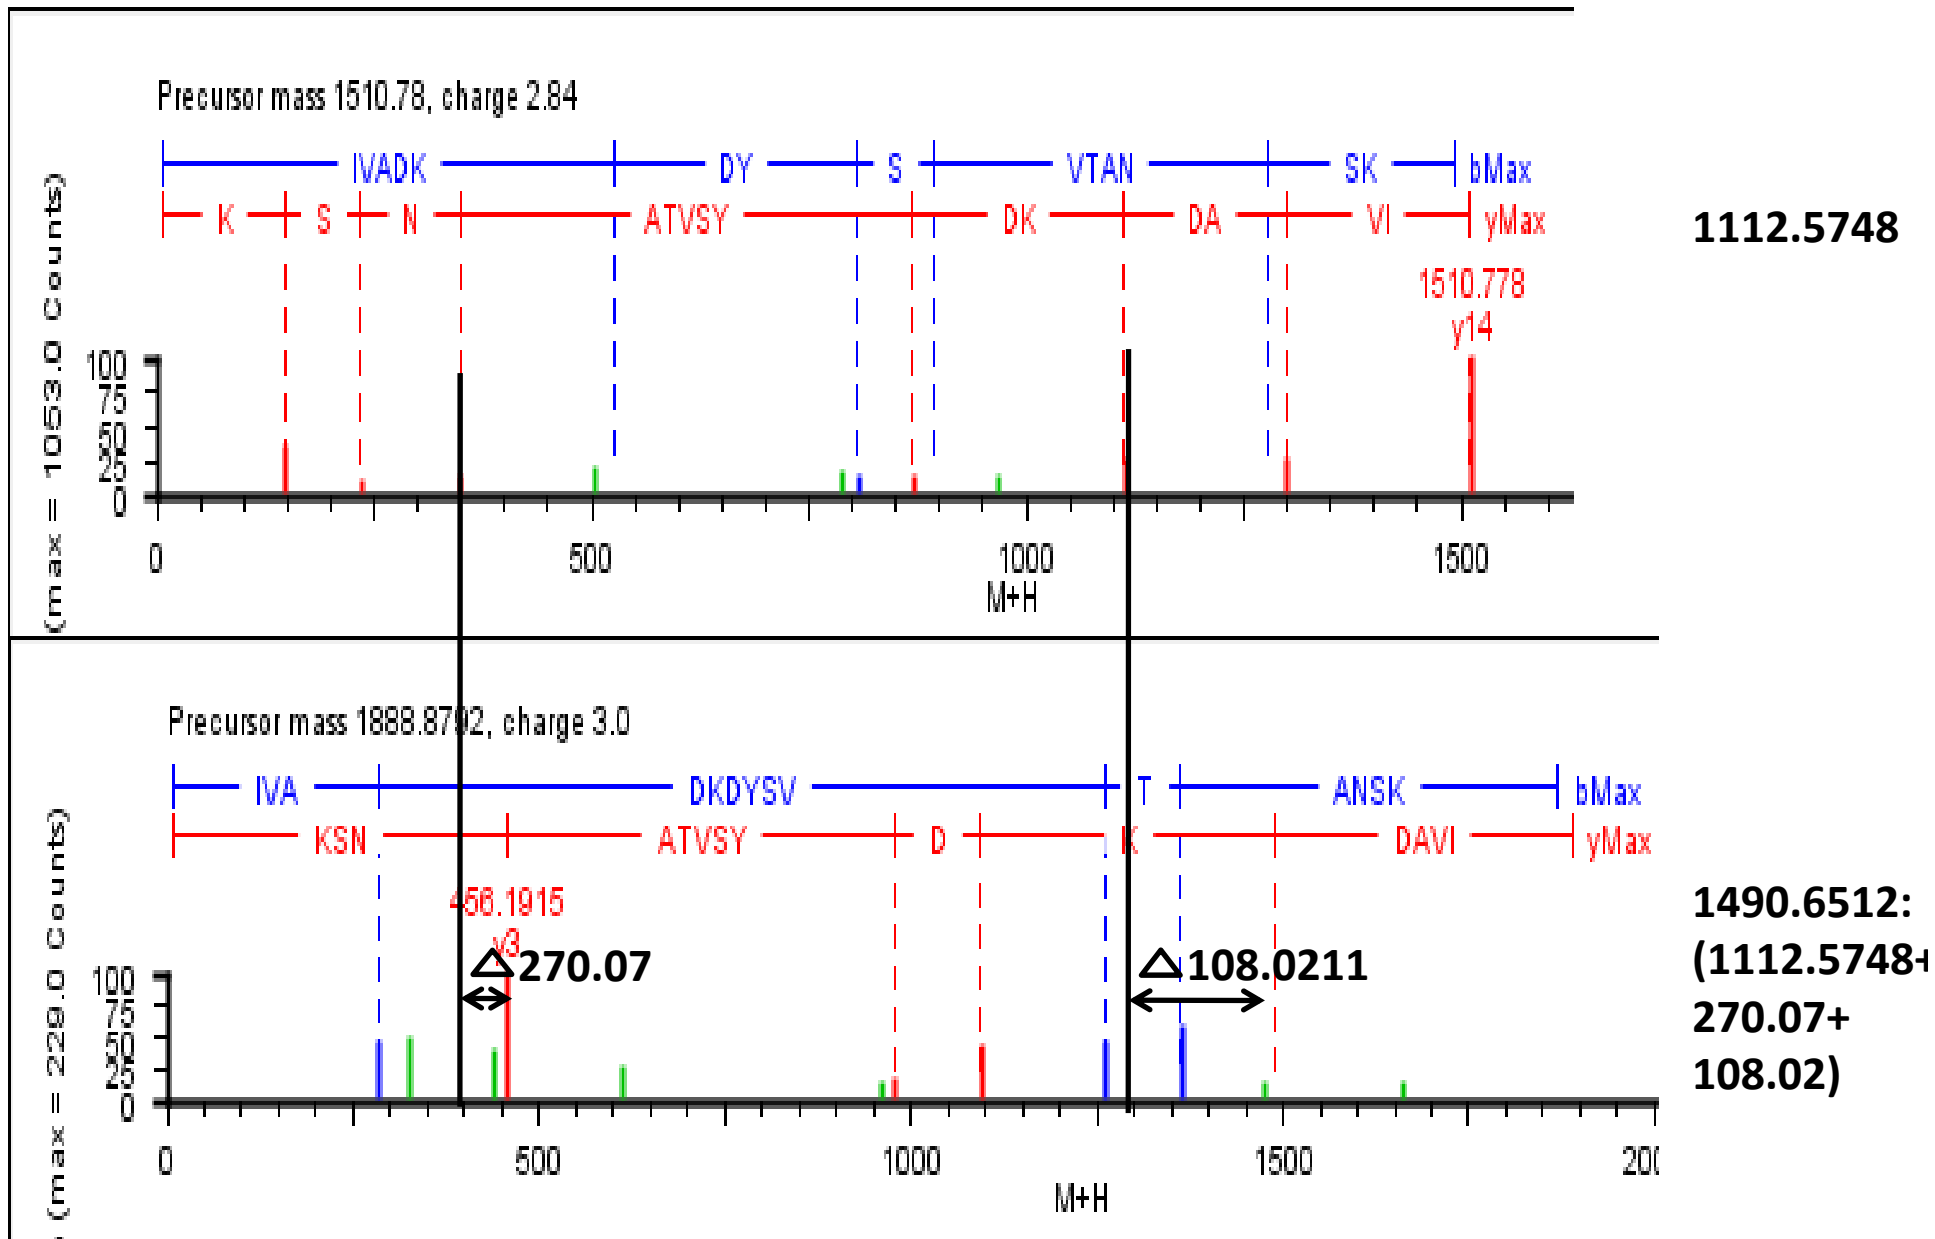

78-91

(K)IVADK(AFGP)DYSVTANSK(Pyrr)(I)

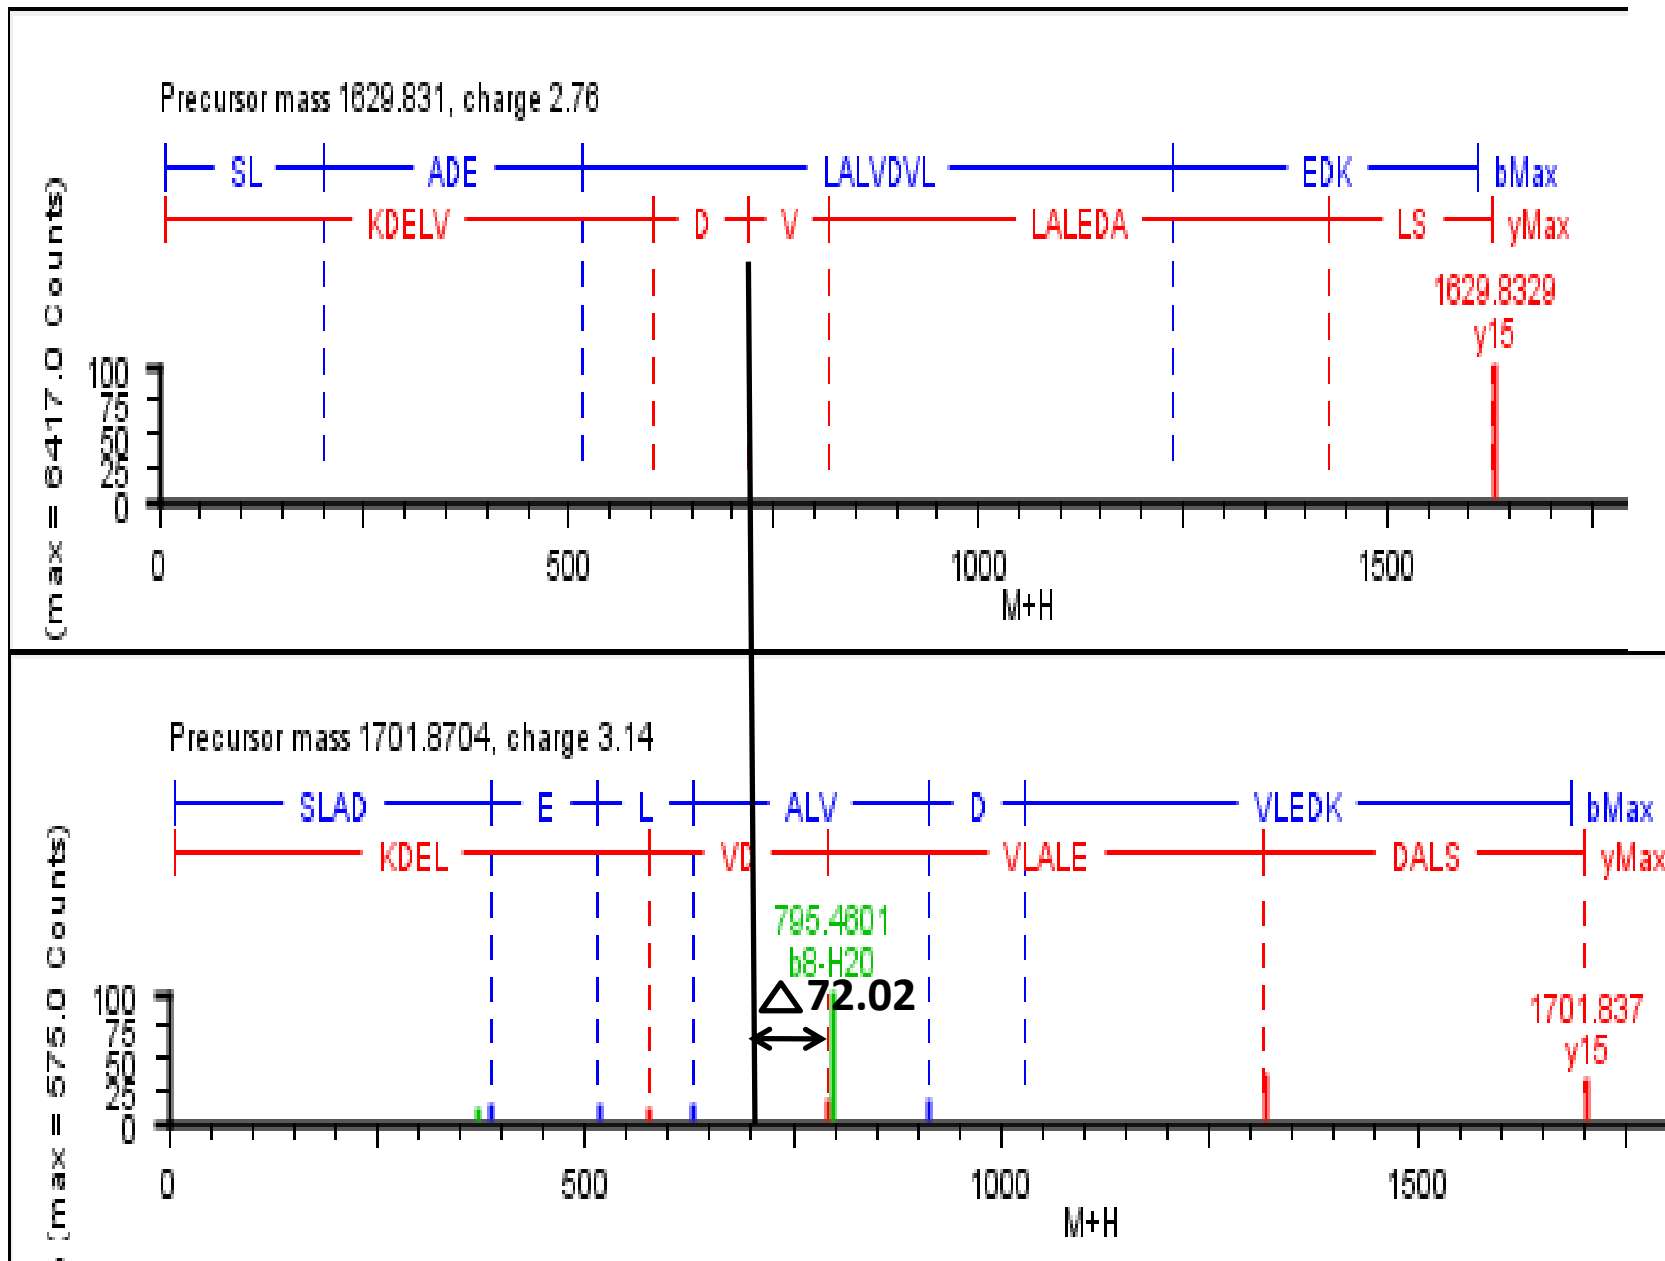

718.3266

790.3942:  
(718.32+  
72.02)

44-58

(K)SLADELALVDVLEDK(CEL)(L)

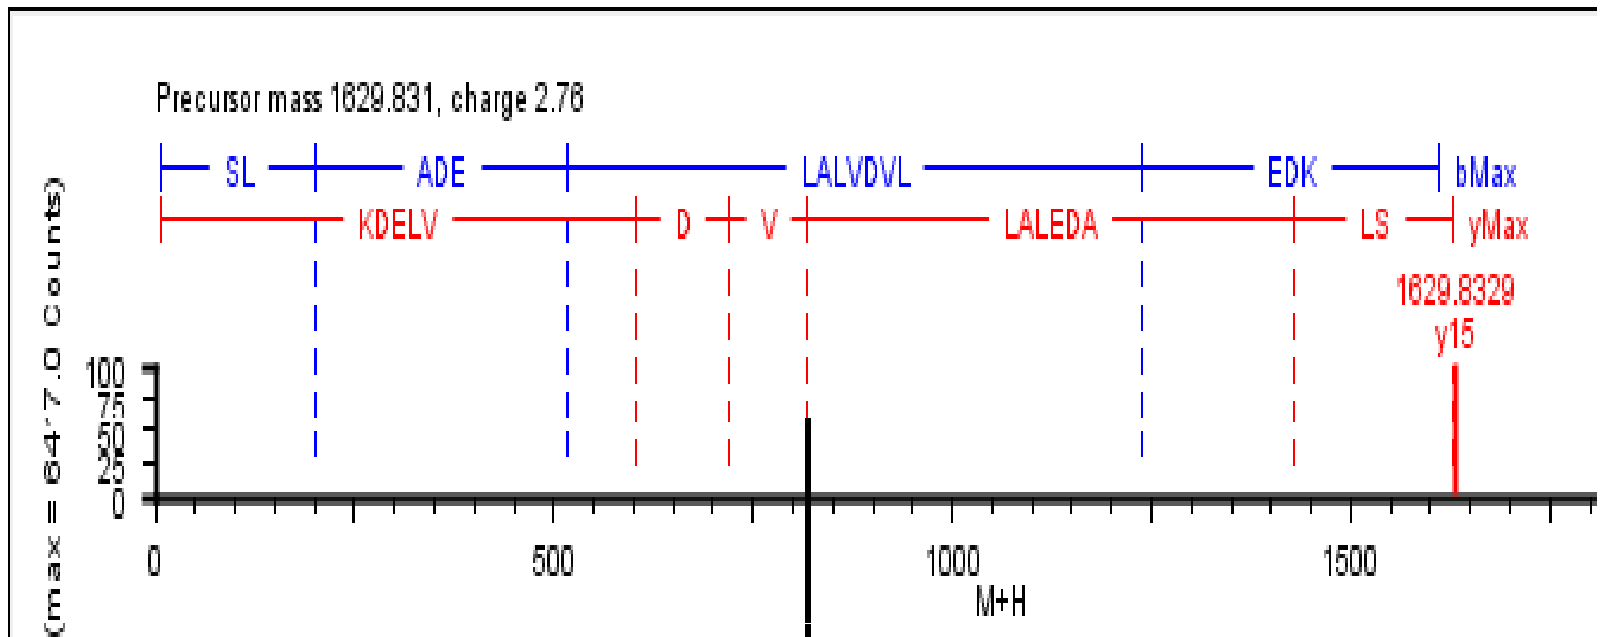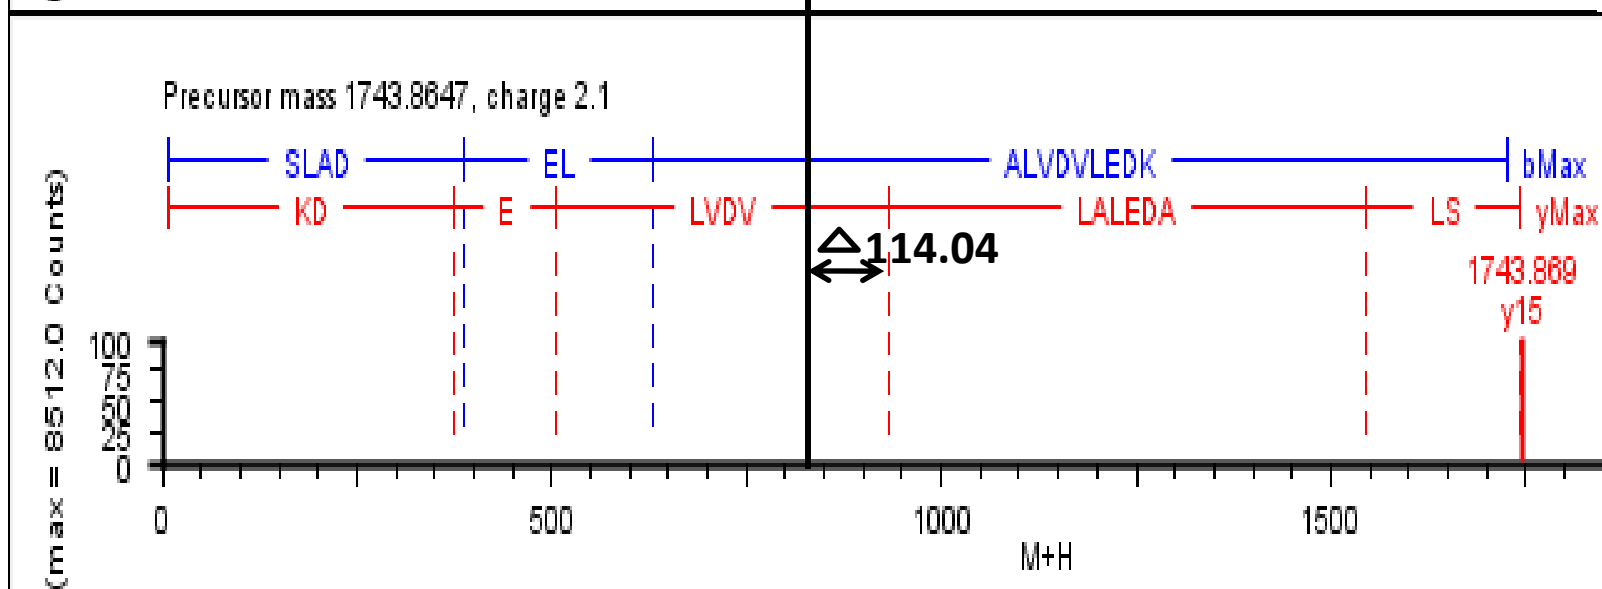

44-58

(K)SLADELALVDVLEDK(Ubi)(L)



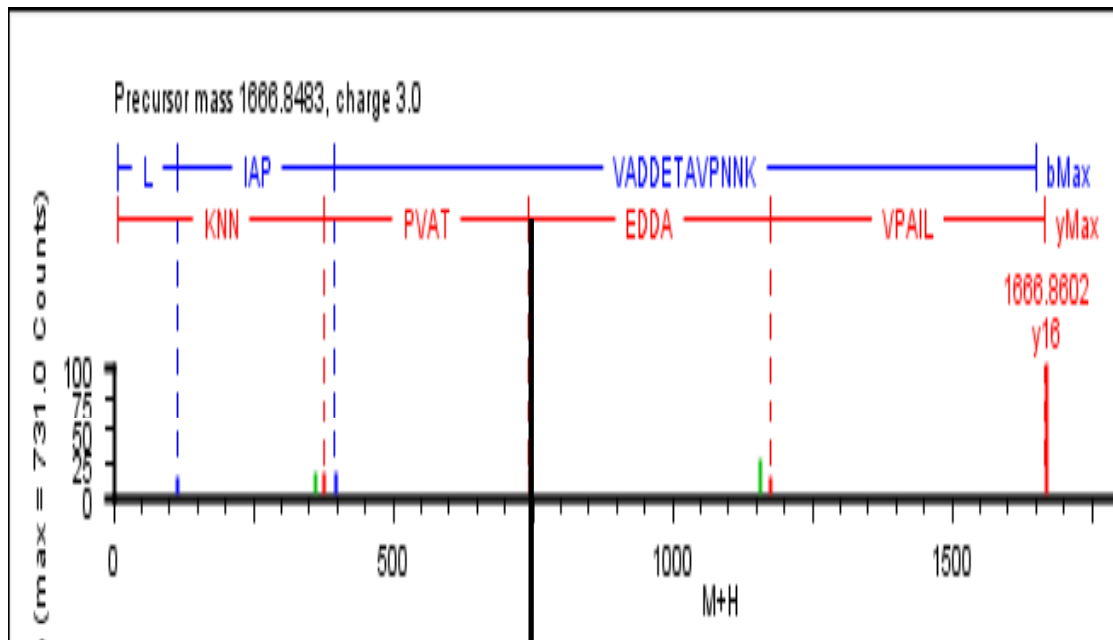

743.3833

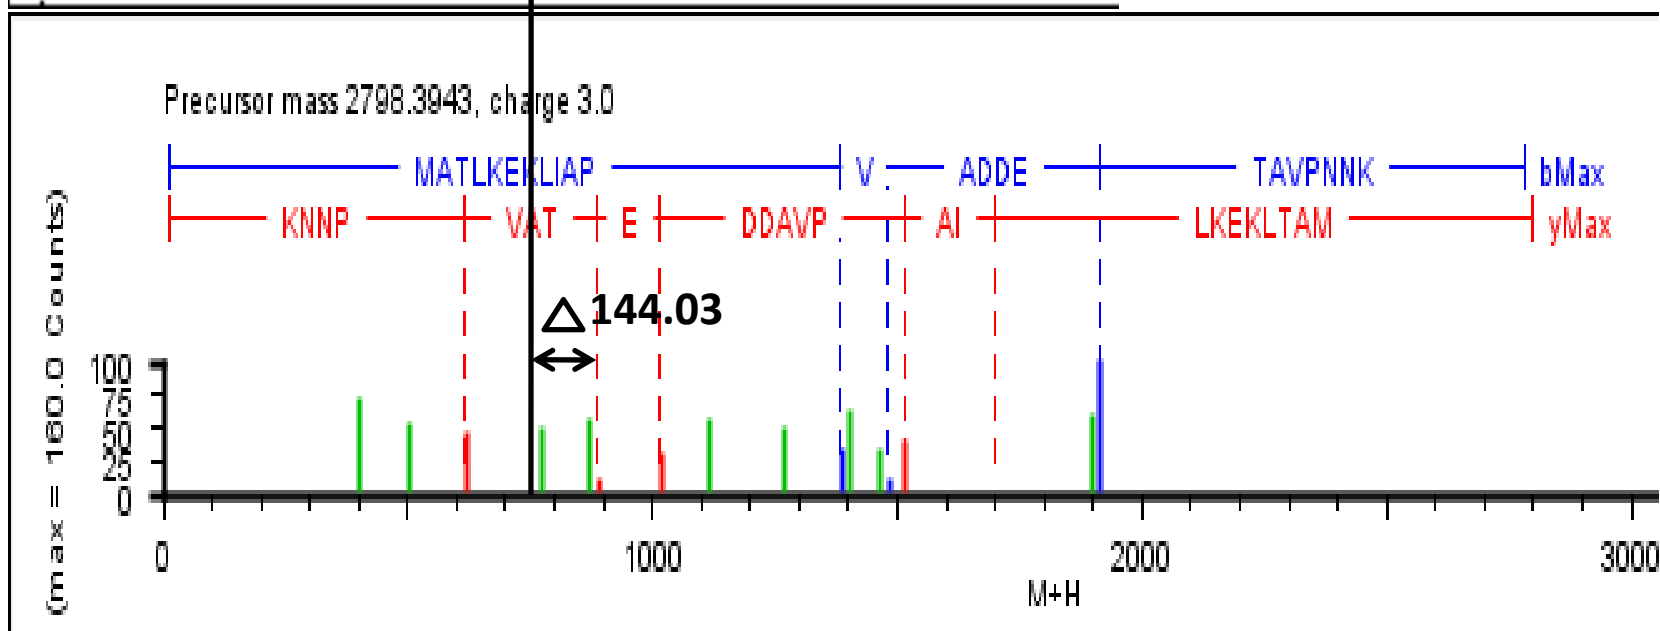

887.4383:  
(743.38+  
144.03)

1- 23

(-)MATLKEKLIAPVADEDETAVPNNK(ImiA)(I)

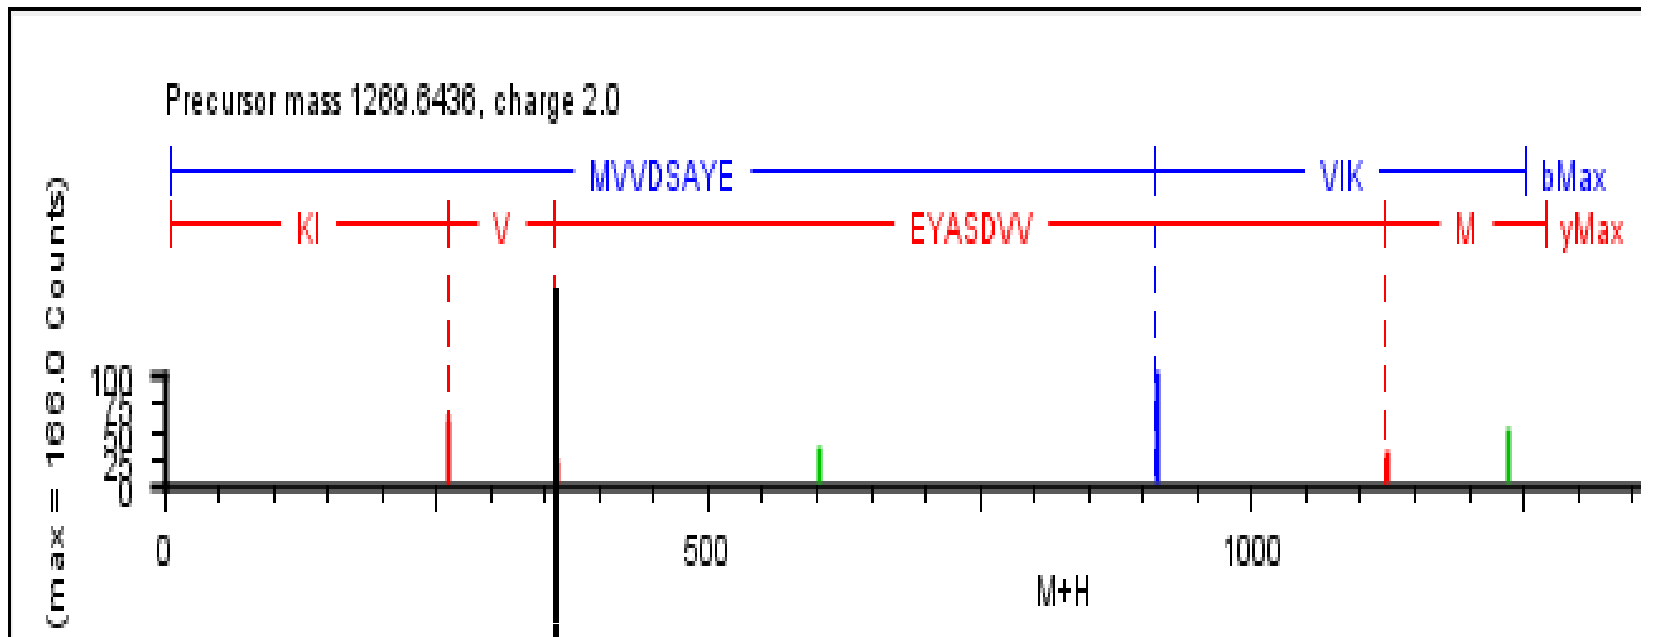

359.2397

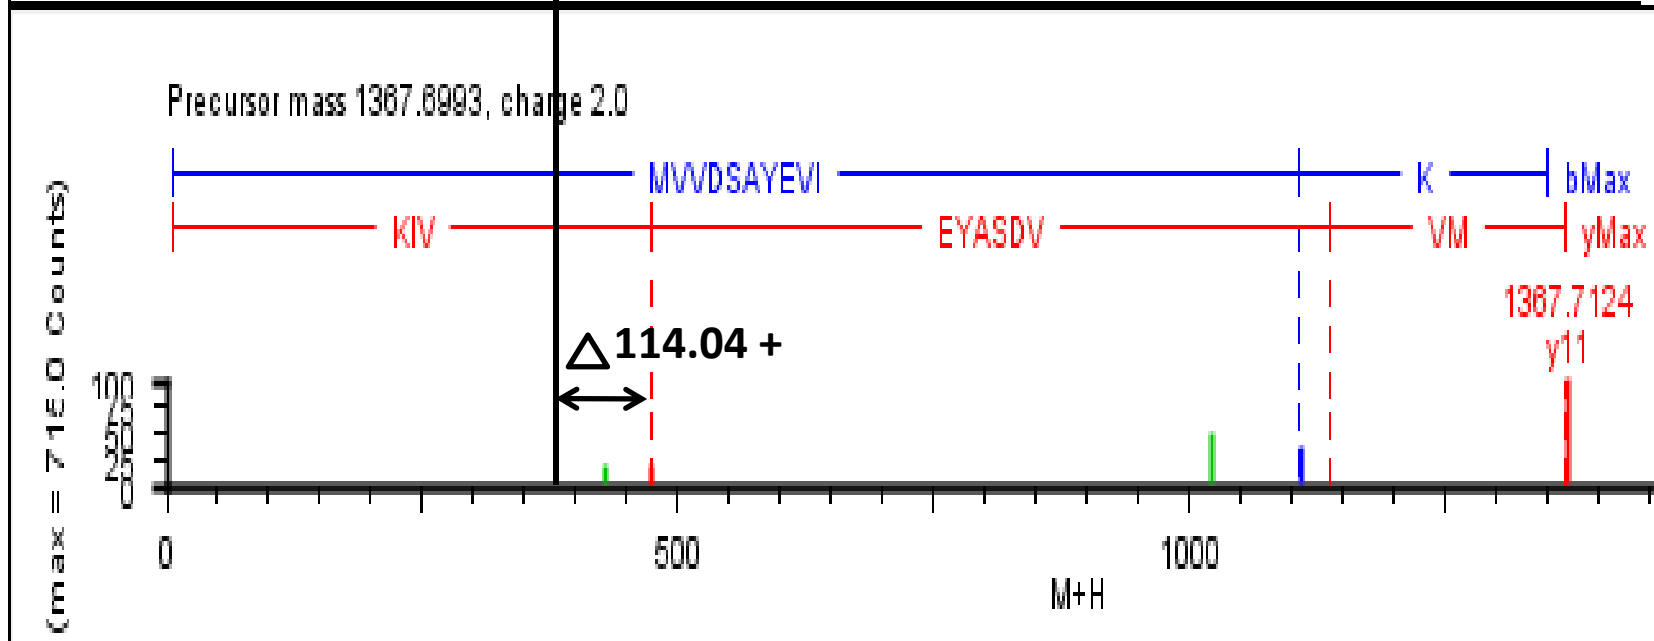

473.3243:  
(359.23+  
114.04)

234-244

(K)MVVDSAYEVIK(Ubi)(L)

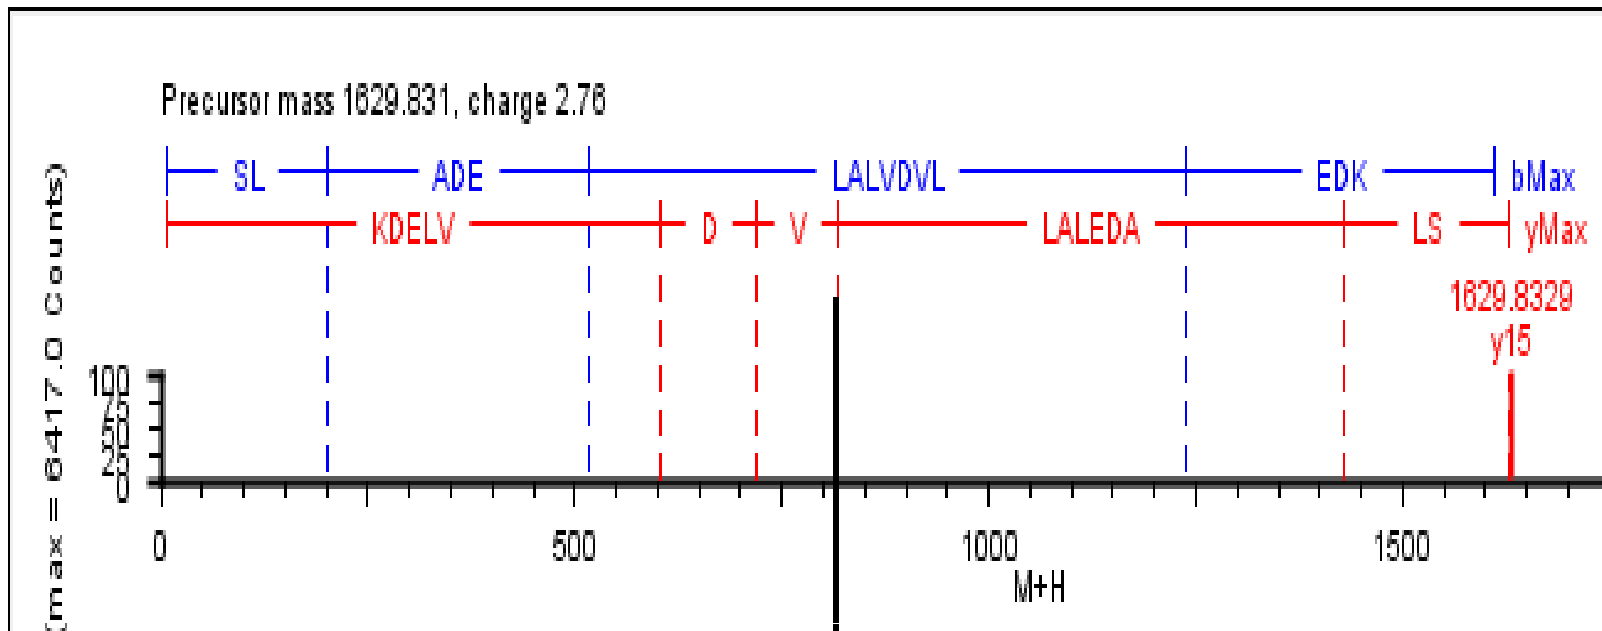

817.404

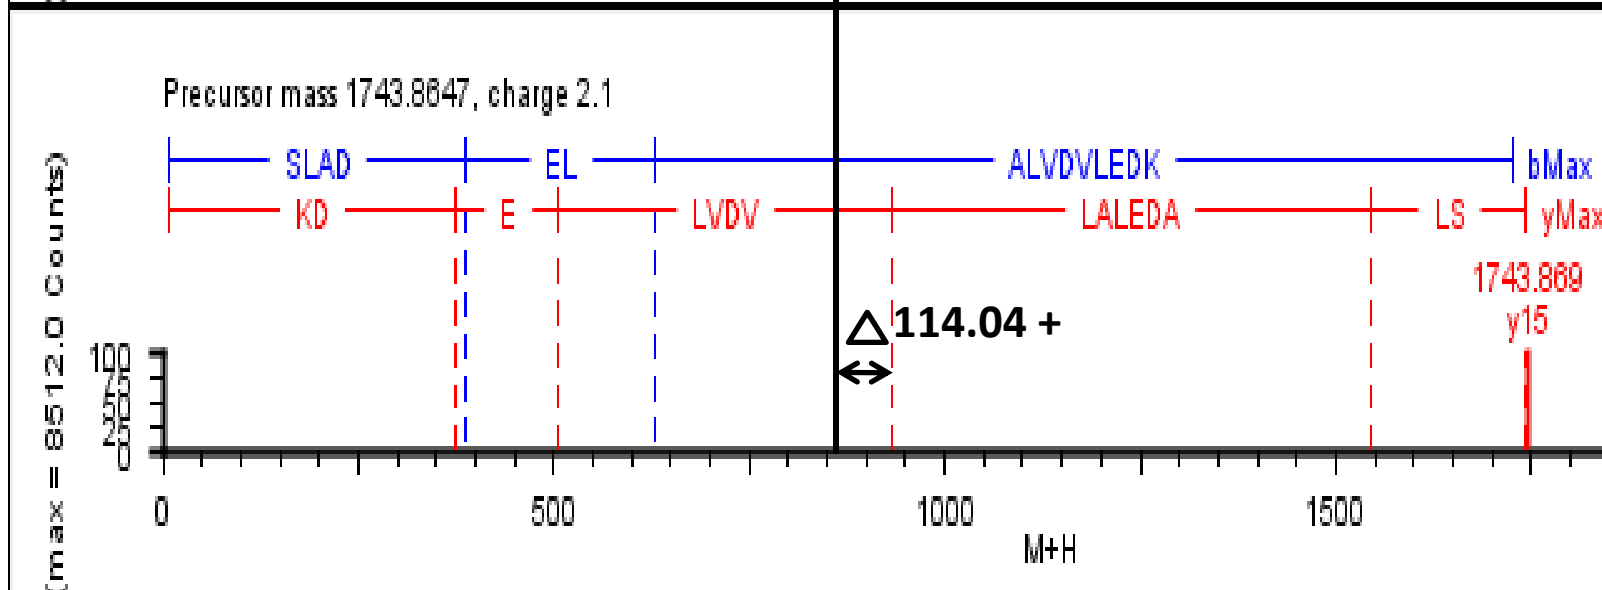

931.4877:  
(817.404+  
114.04)

44-58

(K)SLADELALVDVLEDK(Ubi)(L)

MDH

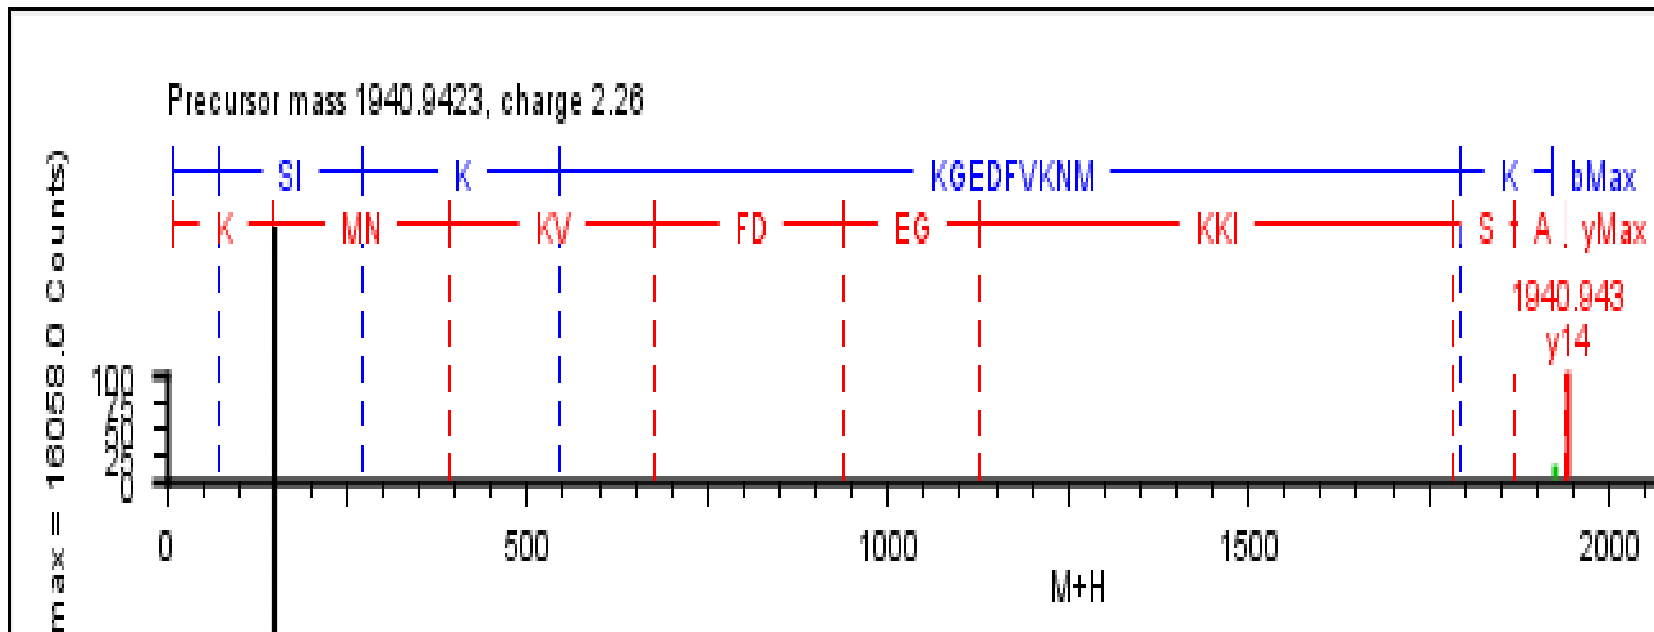

147.1099

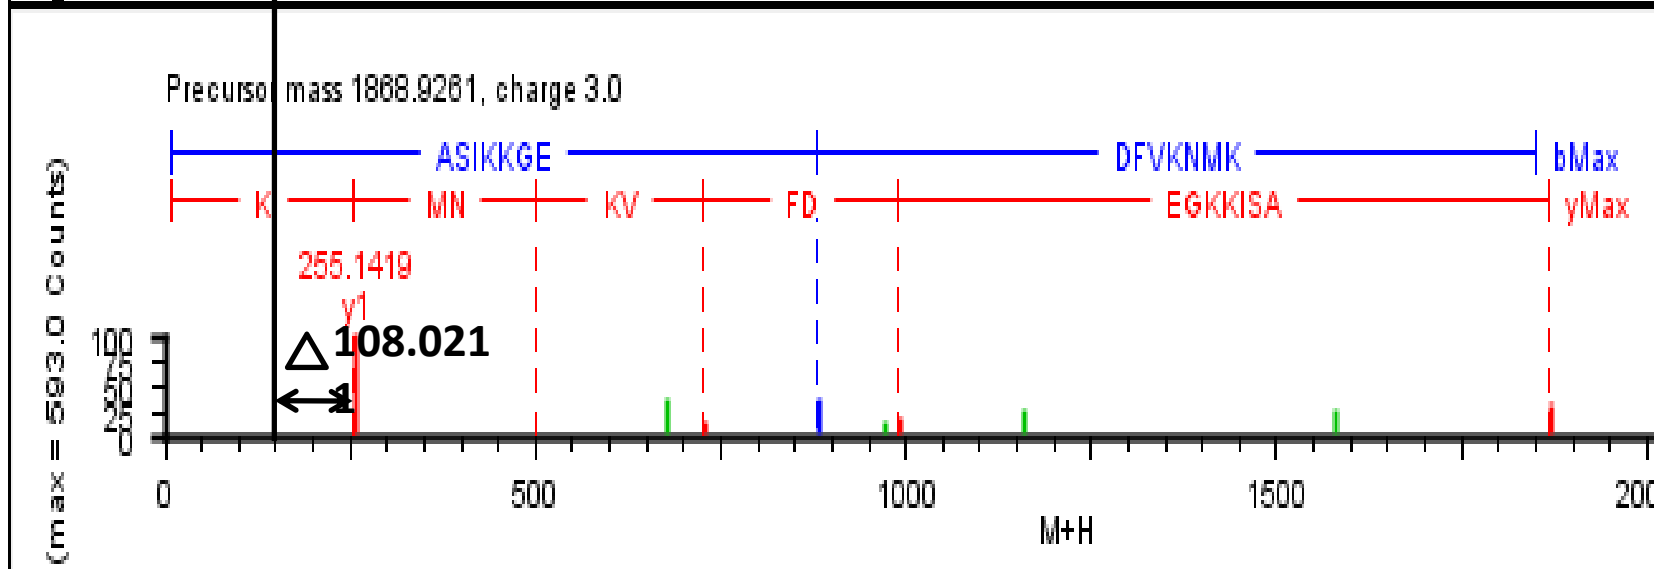

255.1419:  
(147.10+  
108.02)

325-338

(K)ASIKKGEDFVKNMK(Pyr)(-)

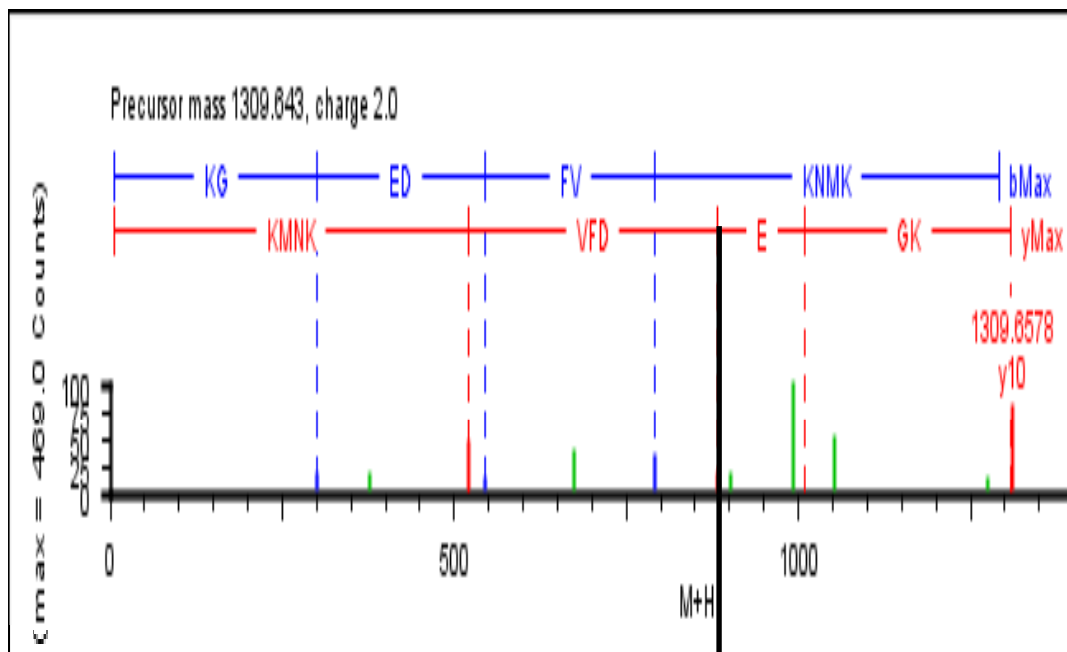

881.4461

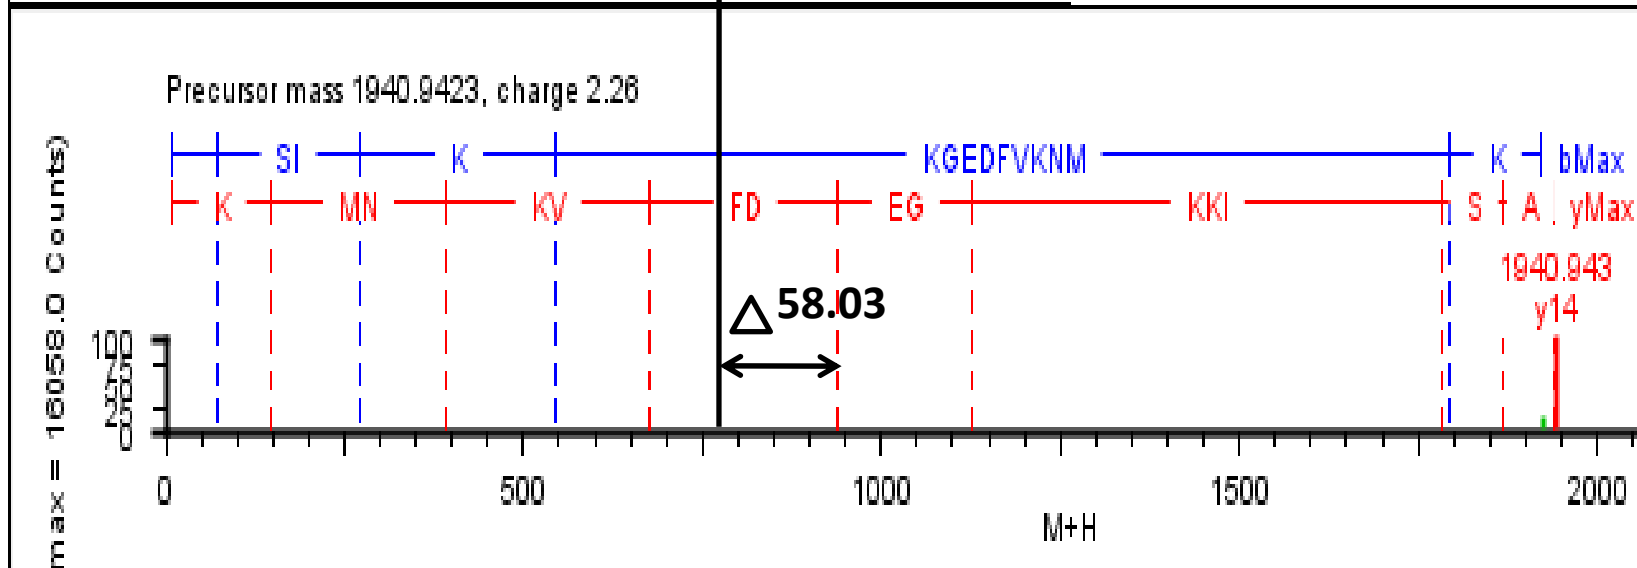

939.4362:  
(881.44+  
58.03)

329-338

(K)KGEDFVKNMK(Pento)(-)

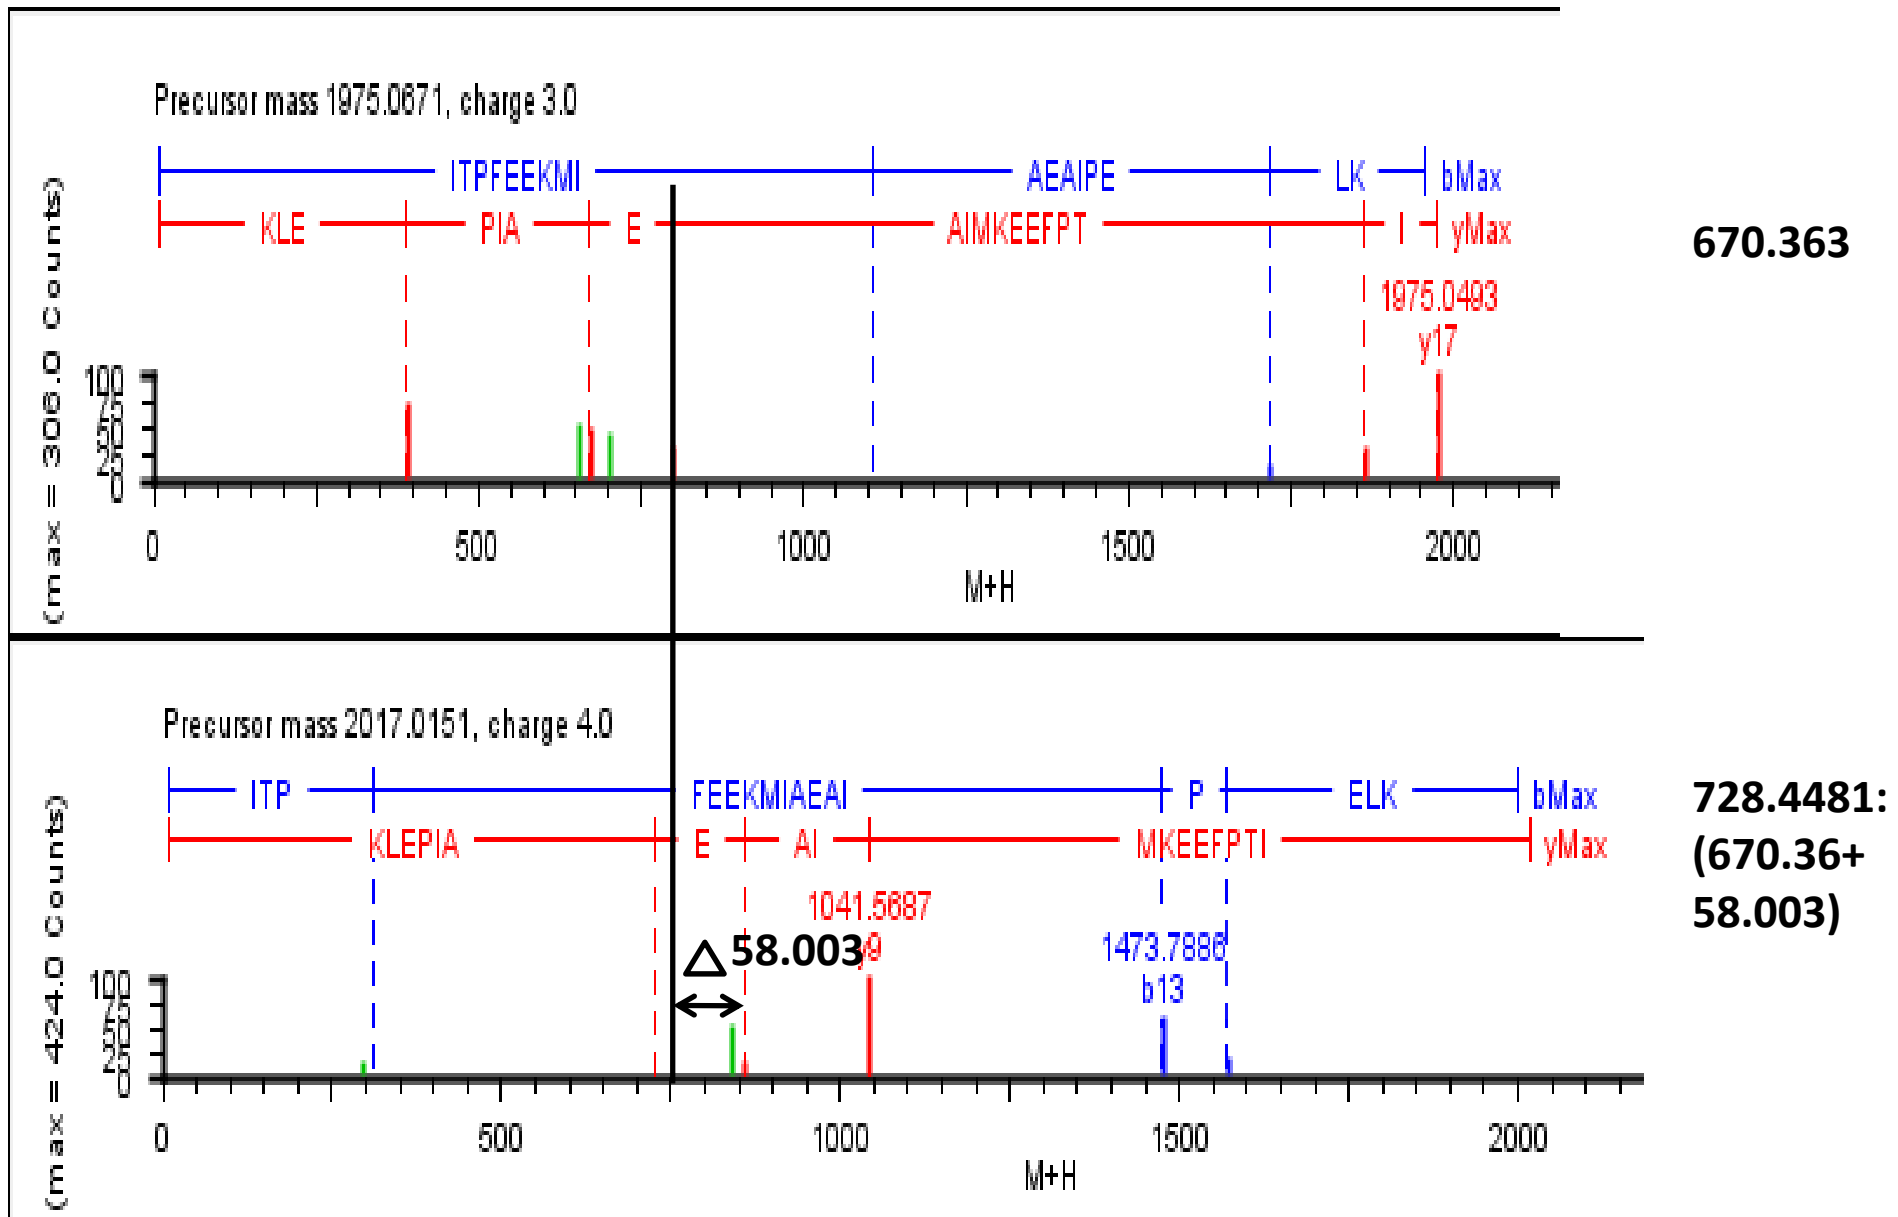

308-324

(K)ITPFEEKMIAEAIPELK(CML)(A)

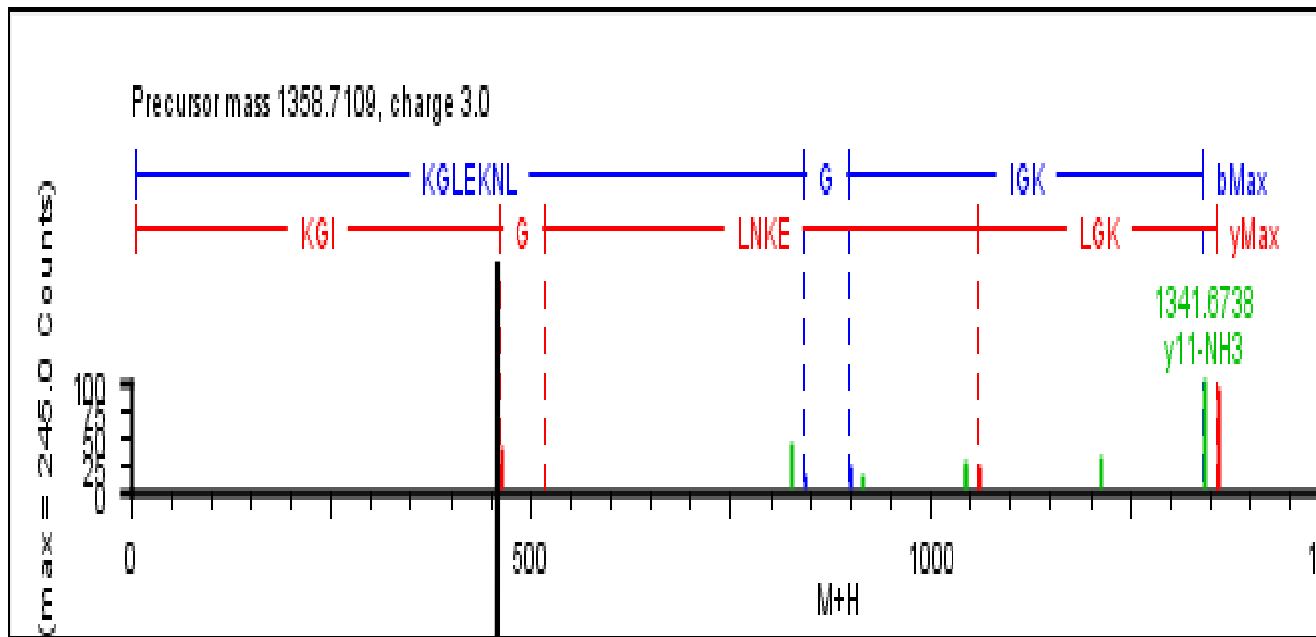

**317.1725**

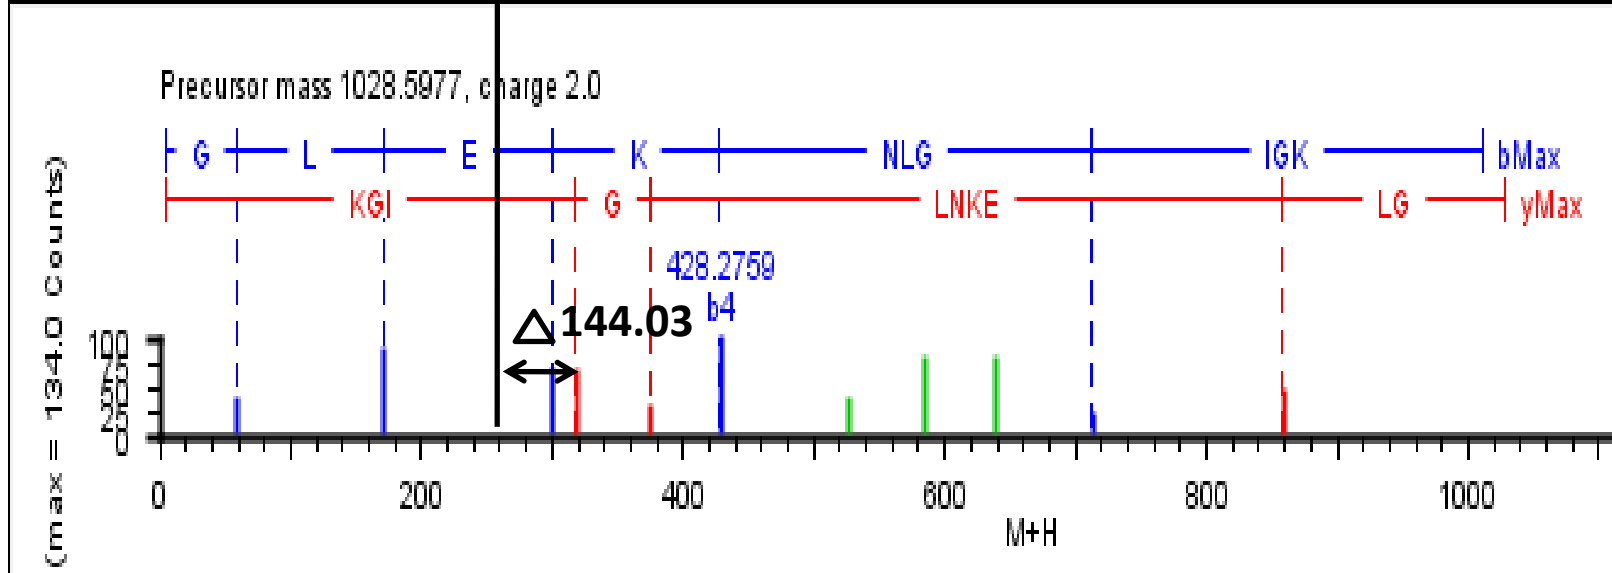

**461.245:  
(317.17+  
144.03)**

**297-307**

**(K)KGLEKNLGIGK(ImiA)(I)**



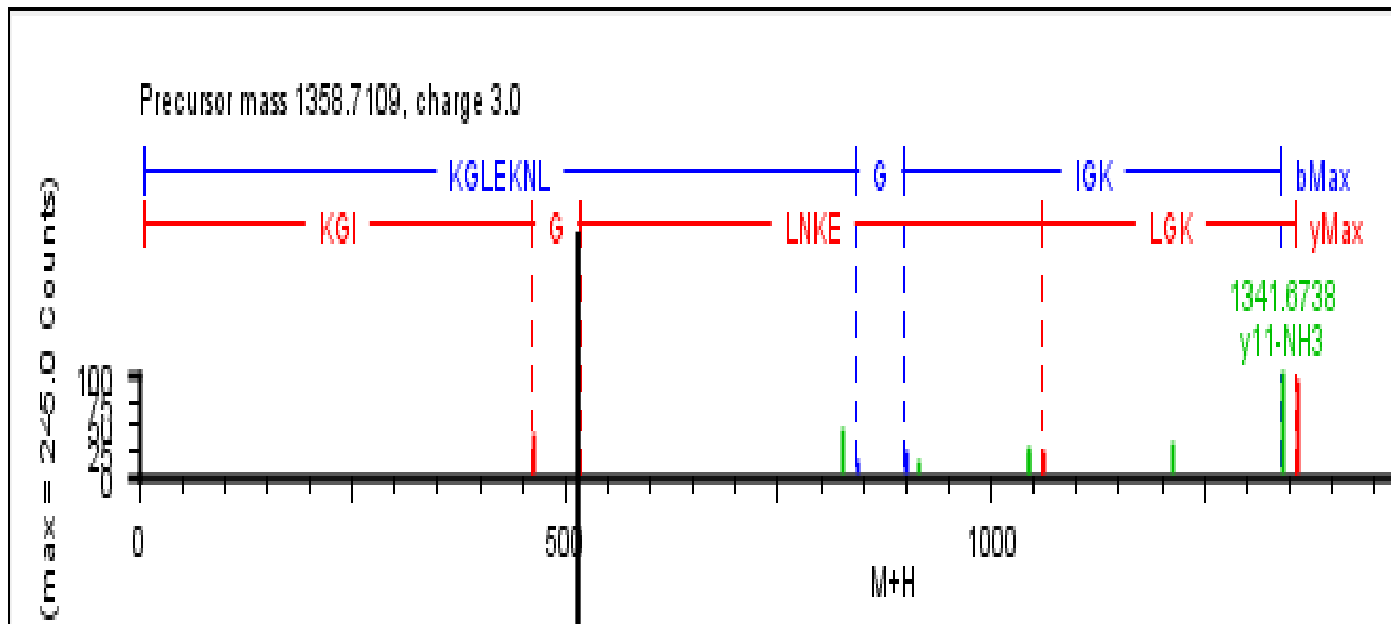

317.1725

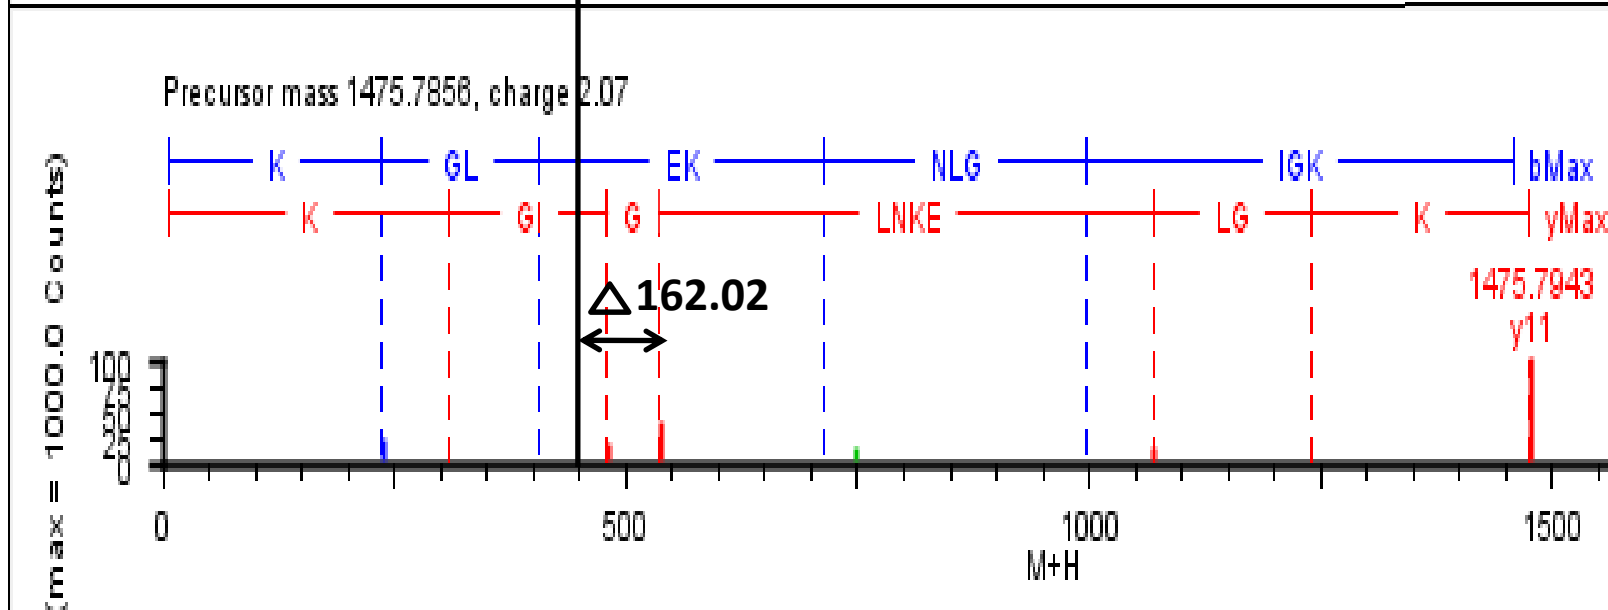

479.2264:  
(317.17+  
162.02)

297-307

(K)KGLEKNLGIGK(Gly)(I)

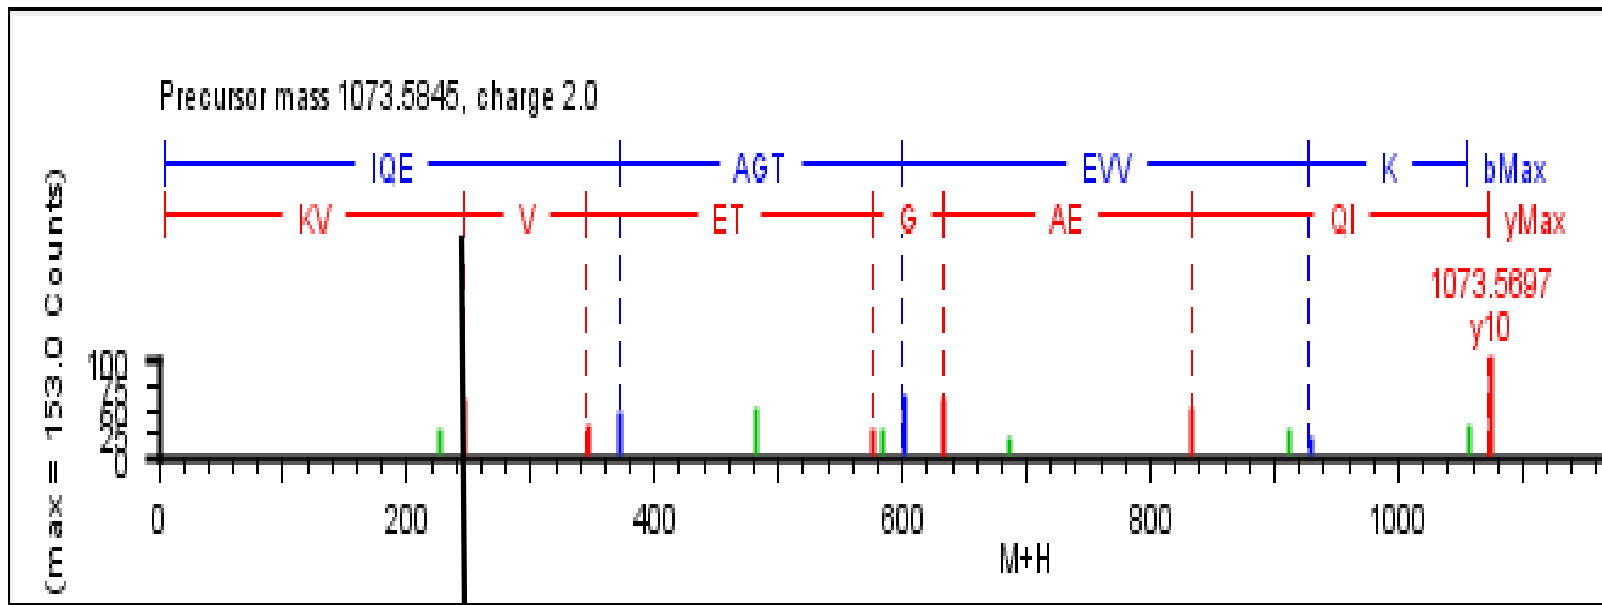

246.1697

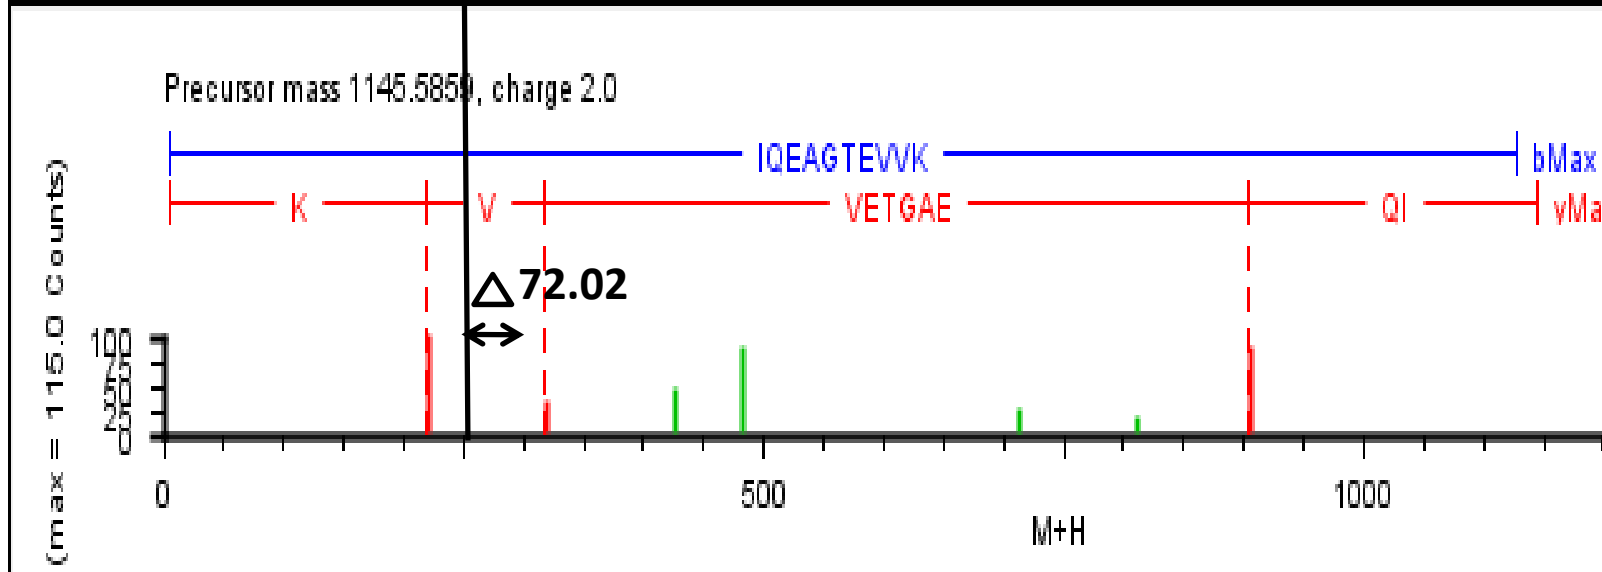

318.2058:  
(246.16+  
72.02)

230-239

(R)IQEAGTEVVK(CEL)(A)

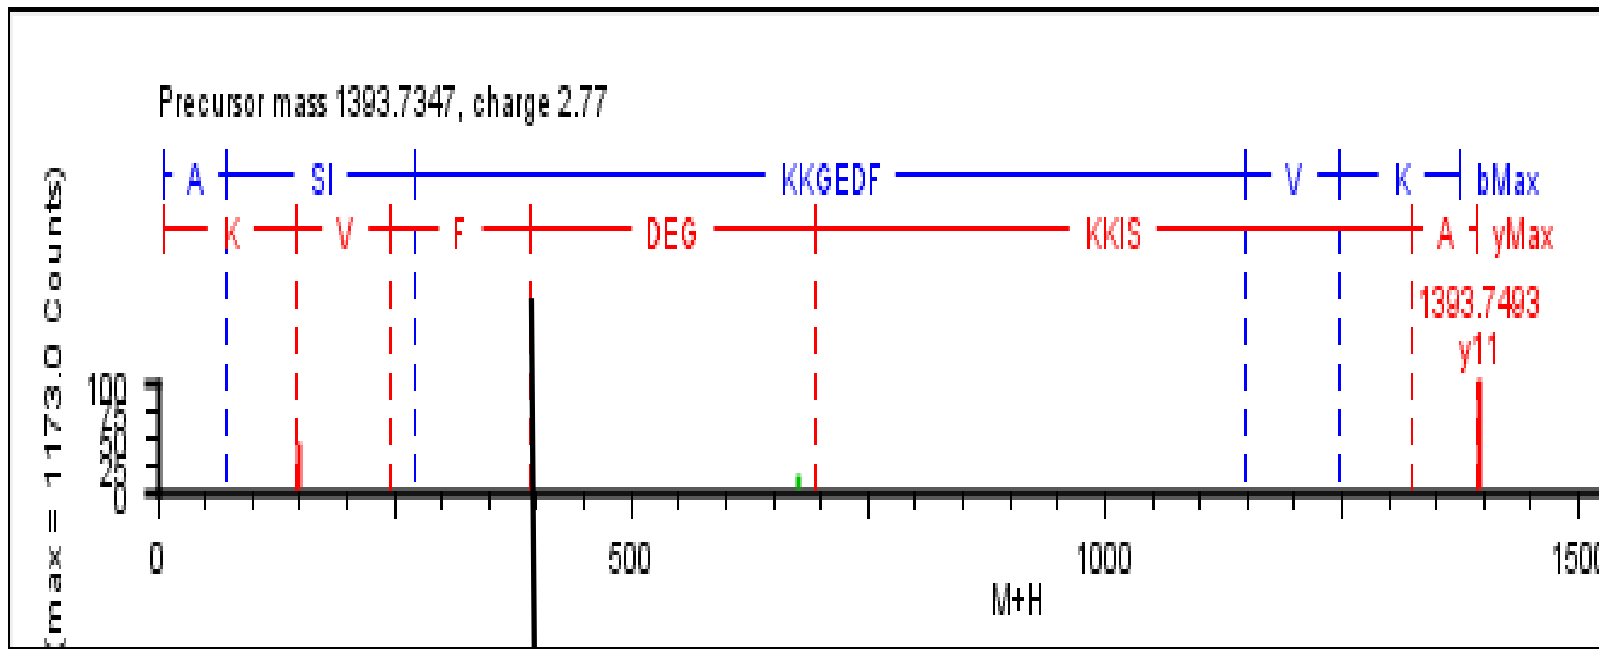

393.2541

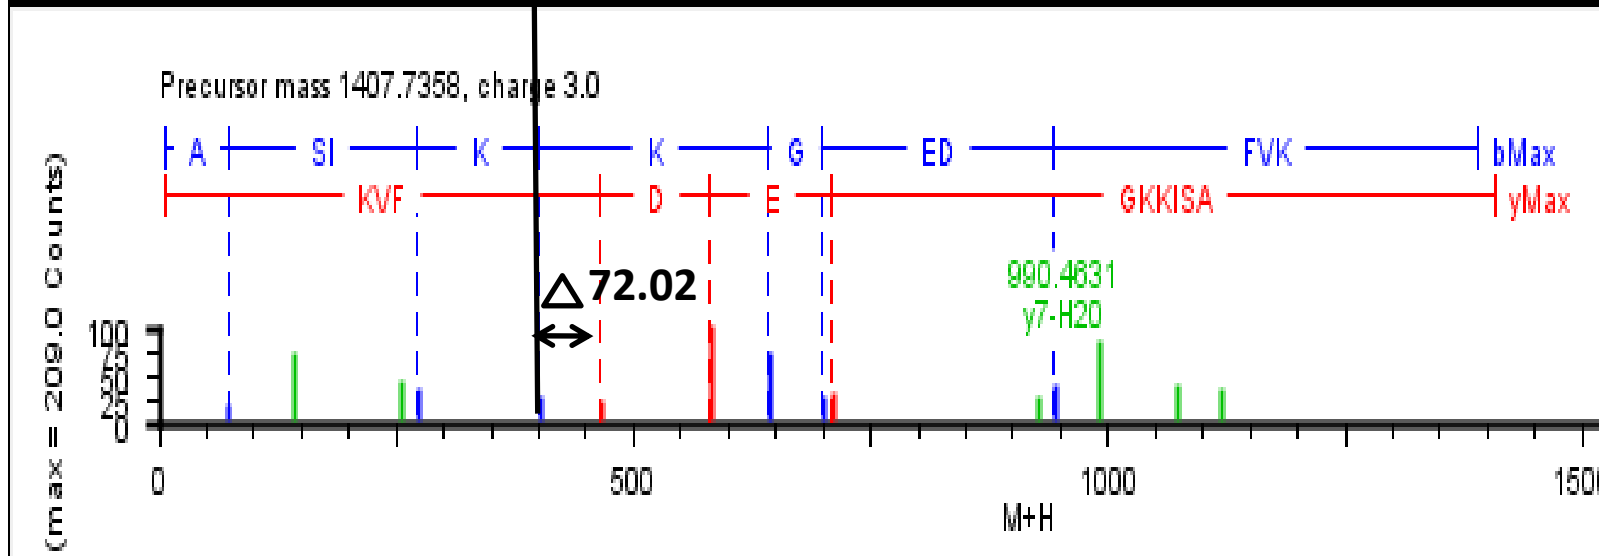

465.2833:  
(393.25+  
72.02)

325-335

(K)ASIKKGEDFVK(CEL)(N)

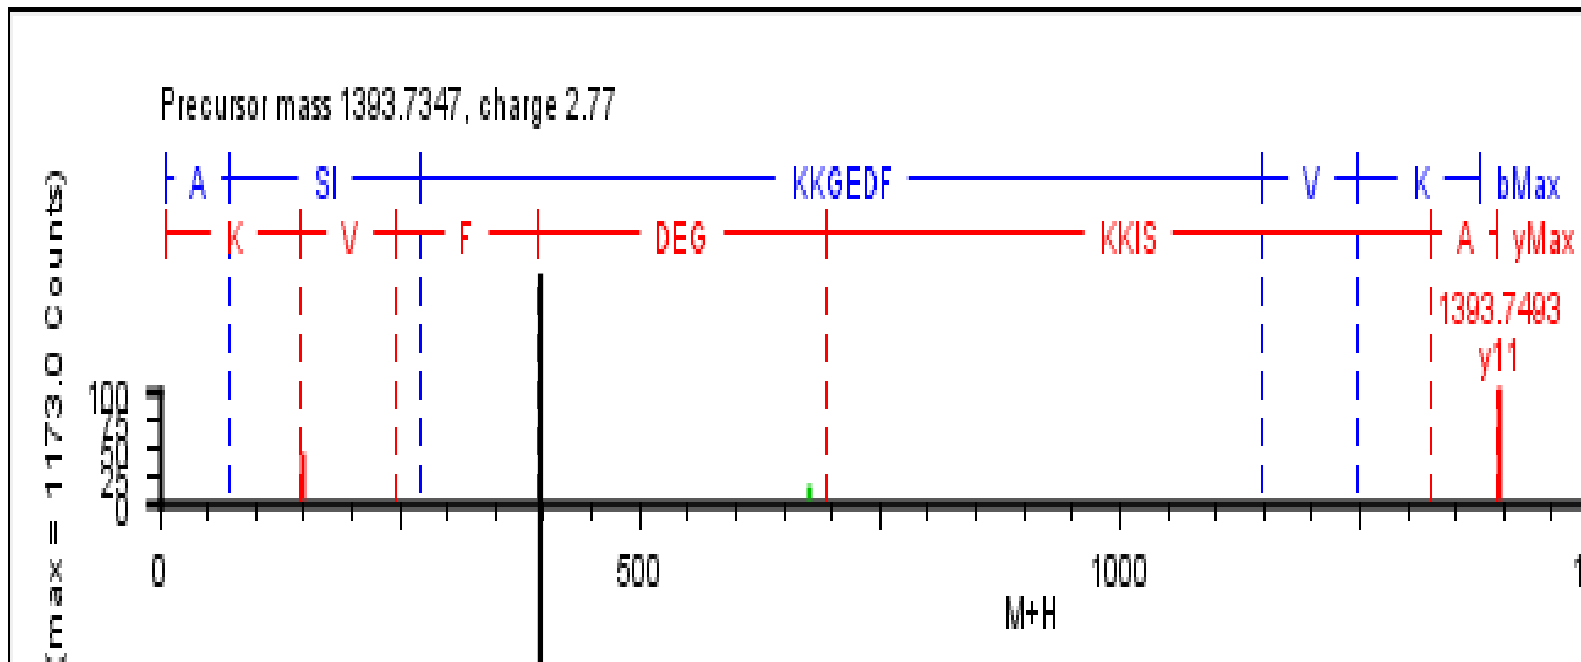

**393.2541**

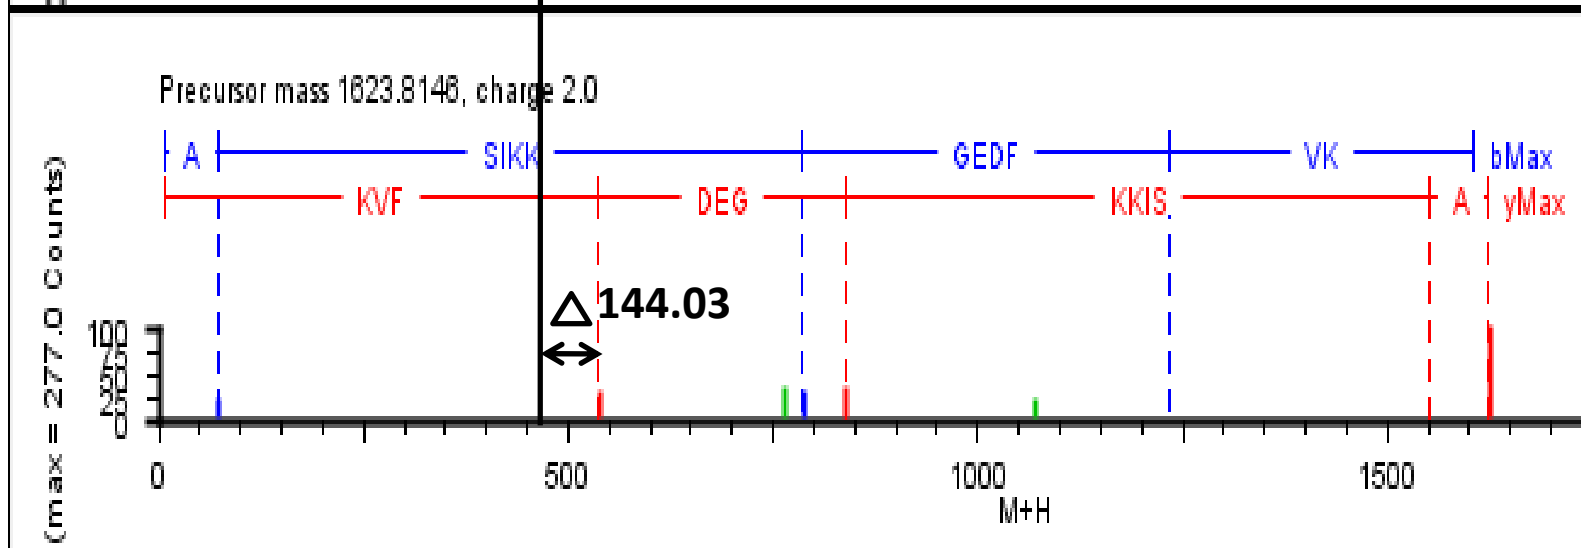

**537.2552:  
(393.25+  
144.03)**

**325-335**

**(K)ASIKKGEDFVK(ImiA)(N)**

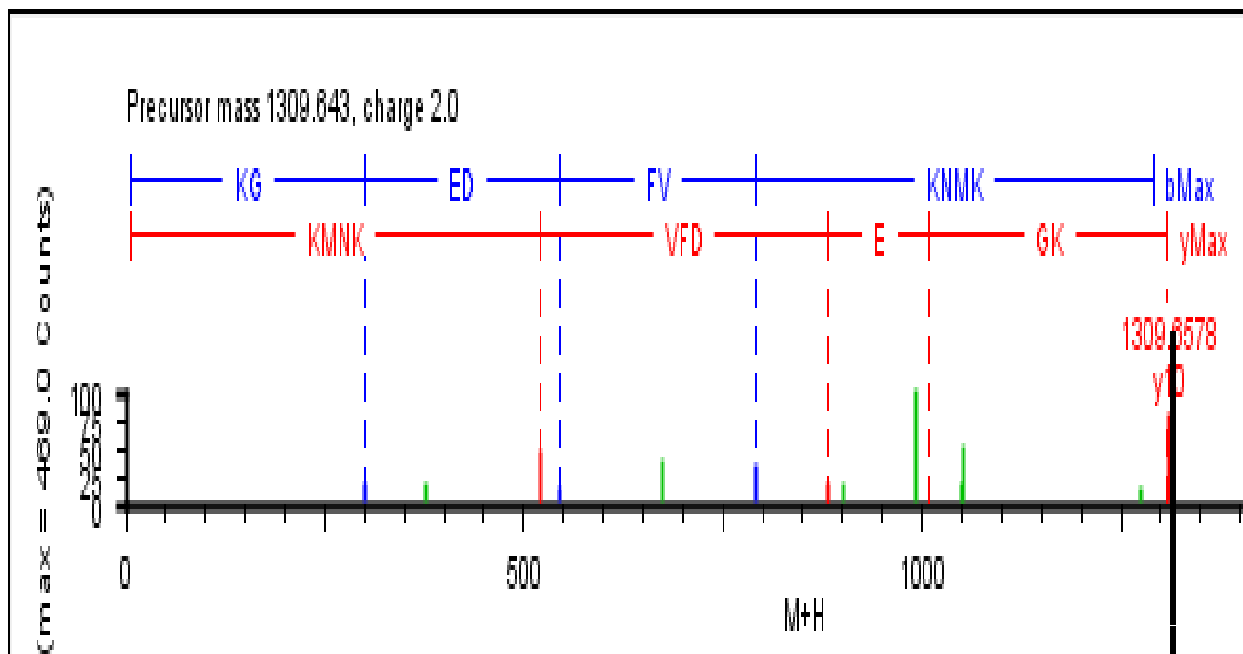

**1309.6578**

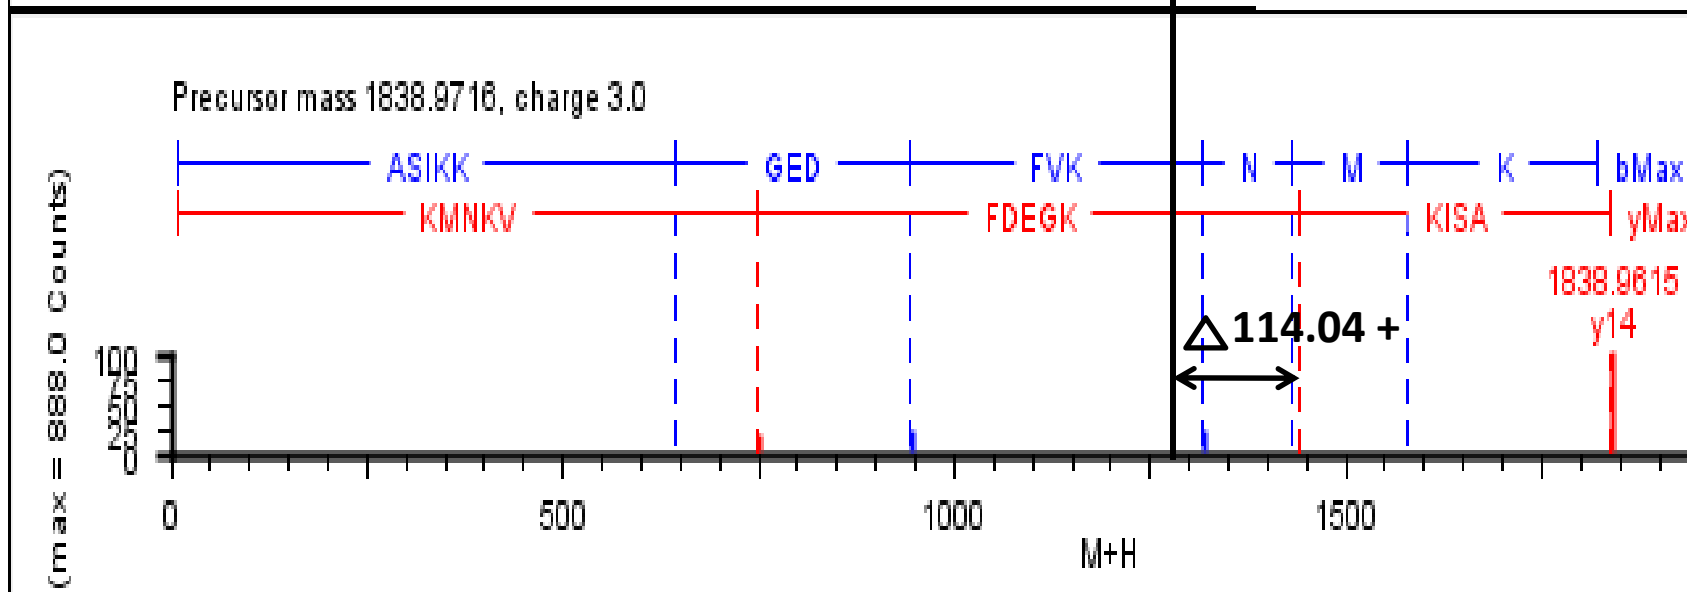

**1439.7446**  
**(1309.65+  
114.04)**

**325-338**

**(K)ASIKKGEDFVKNMK(Ubi)(-)**

**GST**

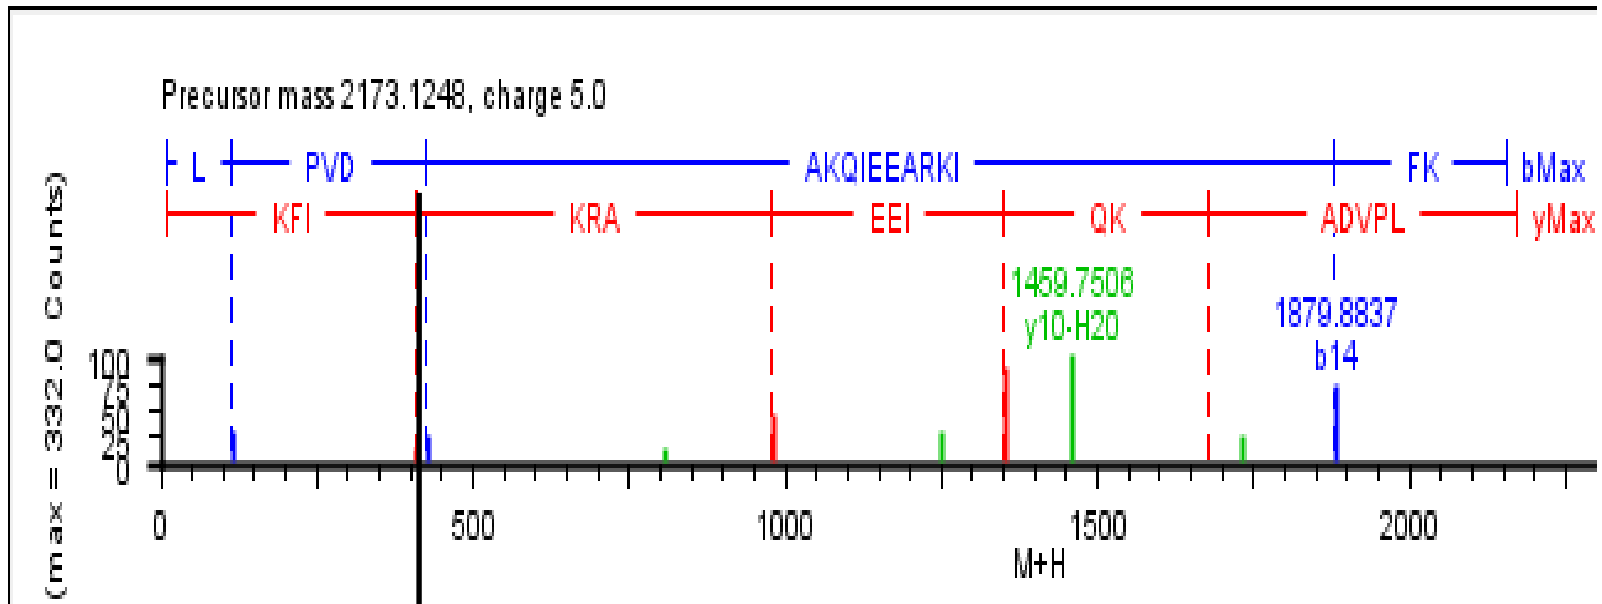

407.269

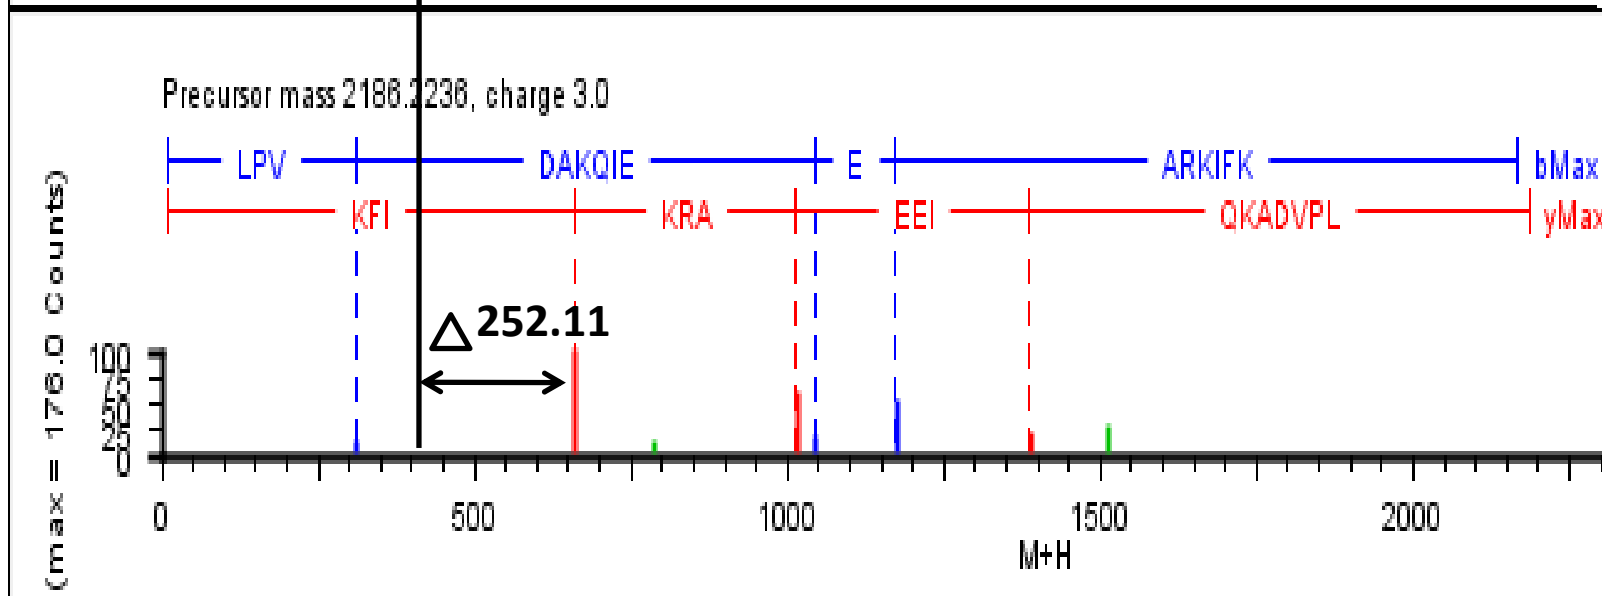

659.3647:  
(407.269+  
252.11)

206-221

(K)LPVDAKQIEEARKIFK(Crossline)(F)

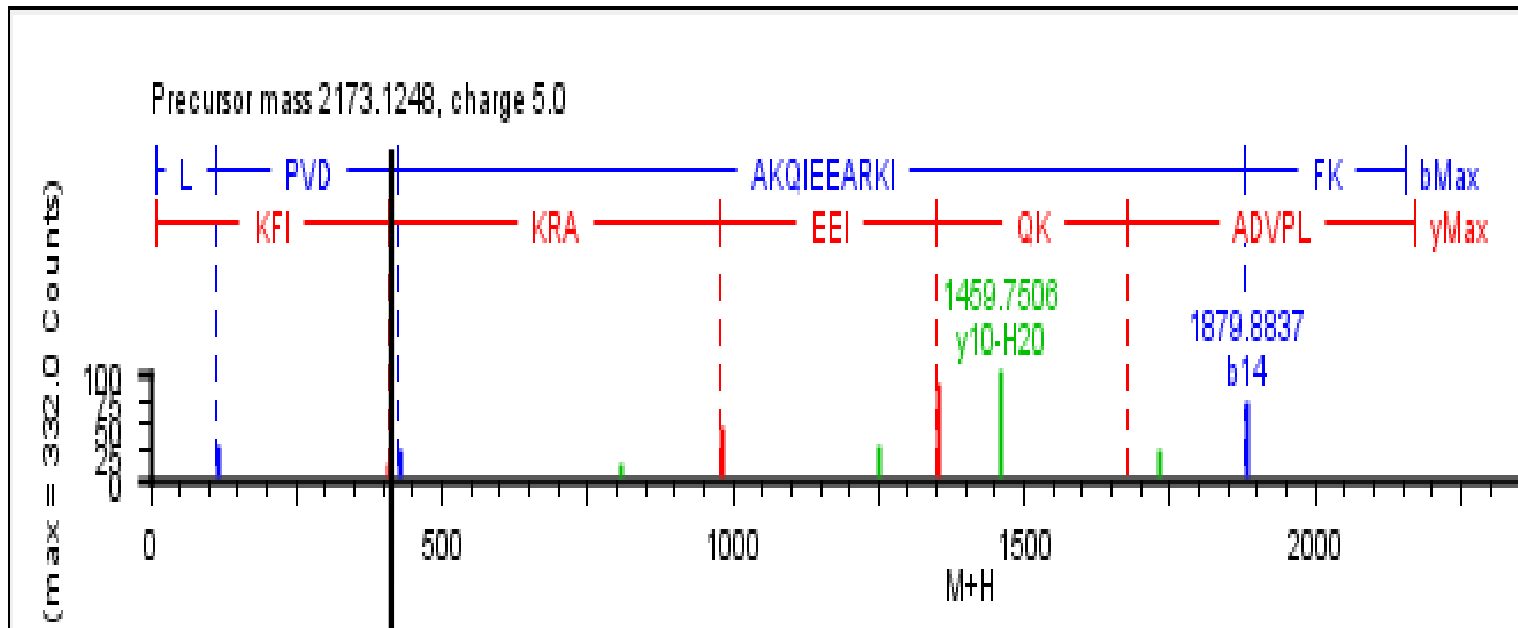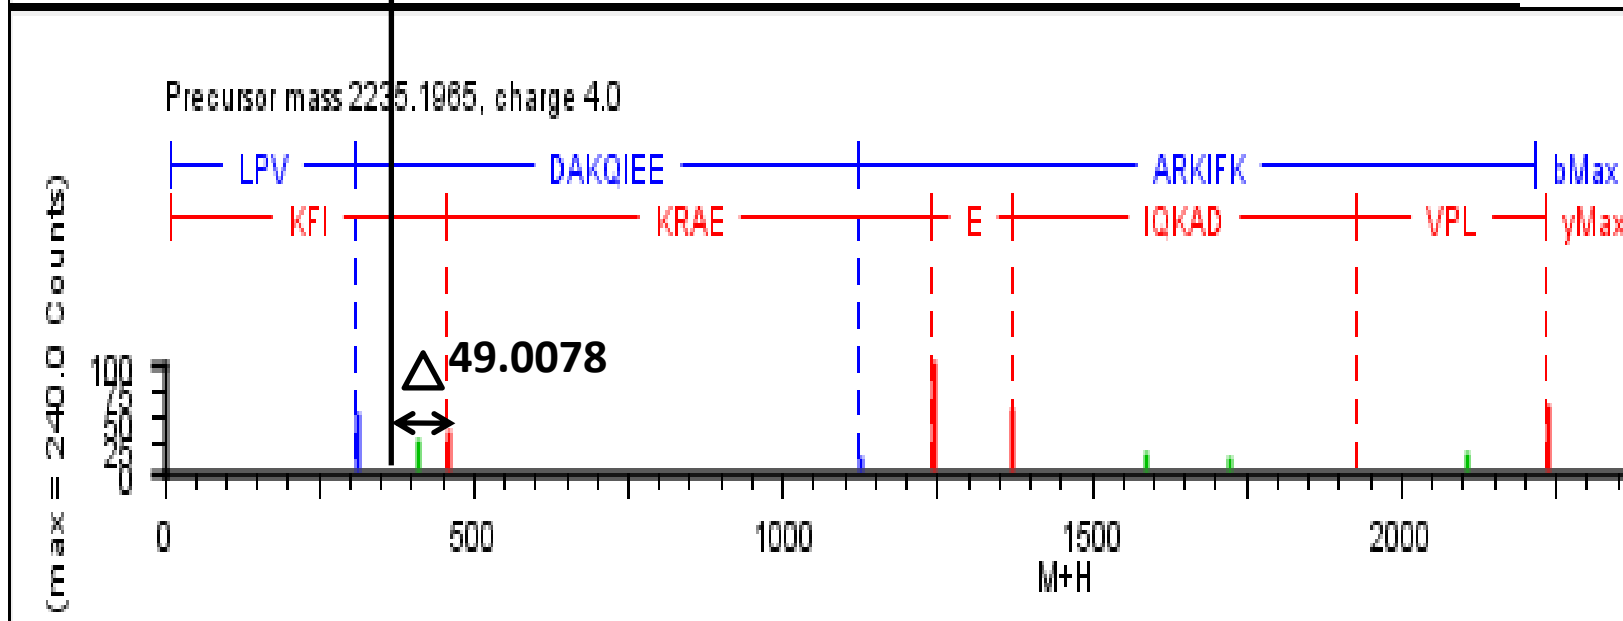

206-221

(K)LPVDAKQIEEARKIFK(MOLD)(F)



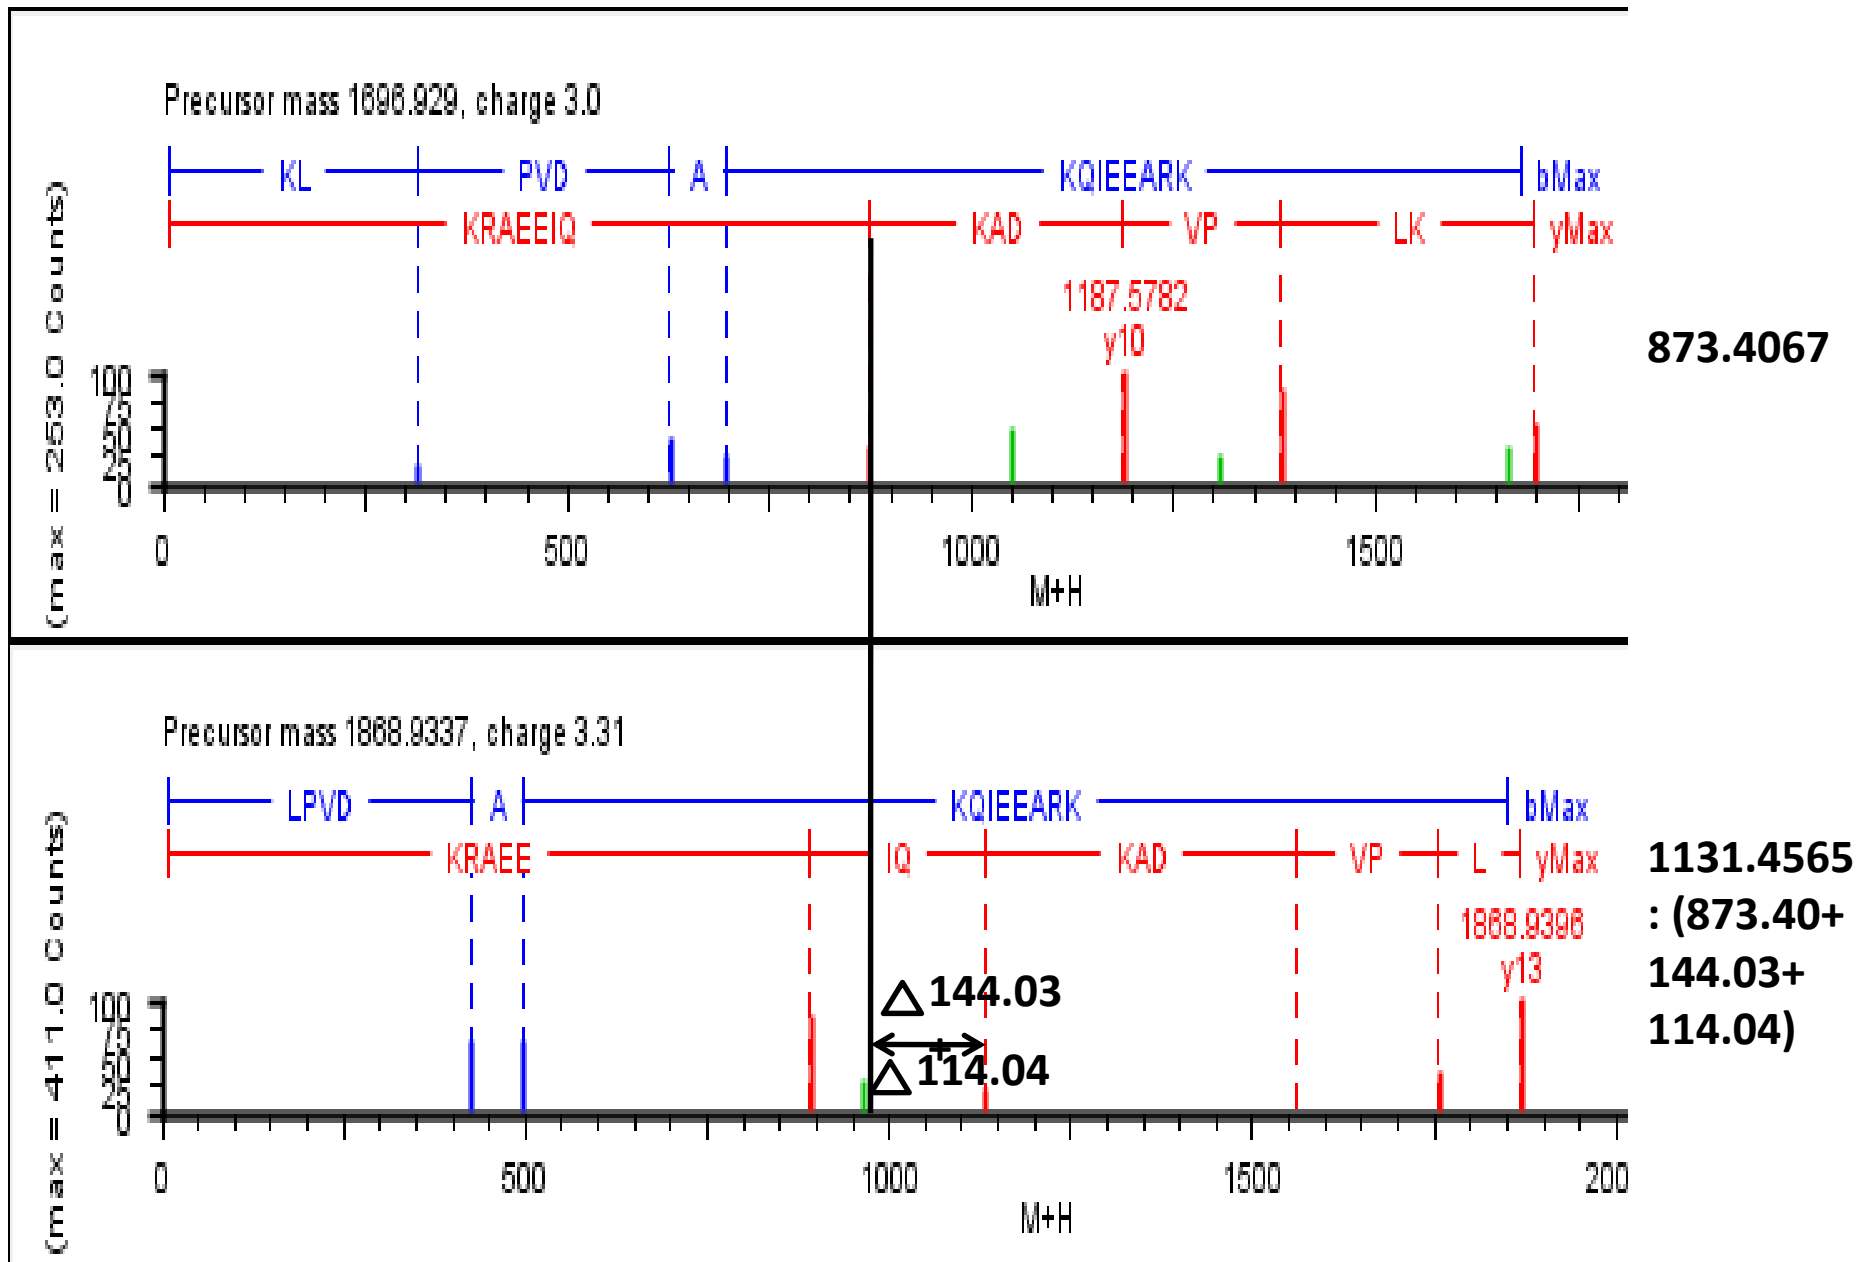

205-218

(R)KLPVDAKQIEEAR(ImiA)K(Ubi)(I)

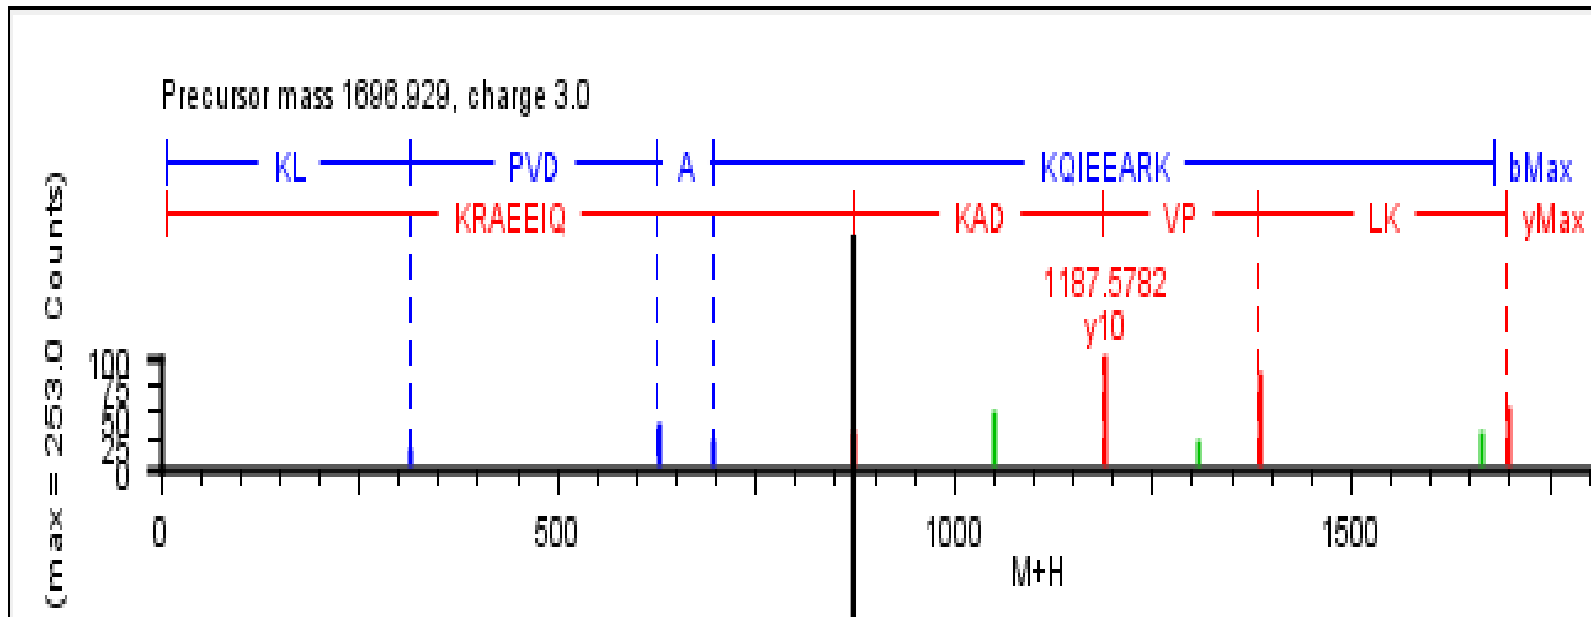

873.4067

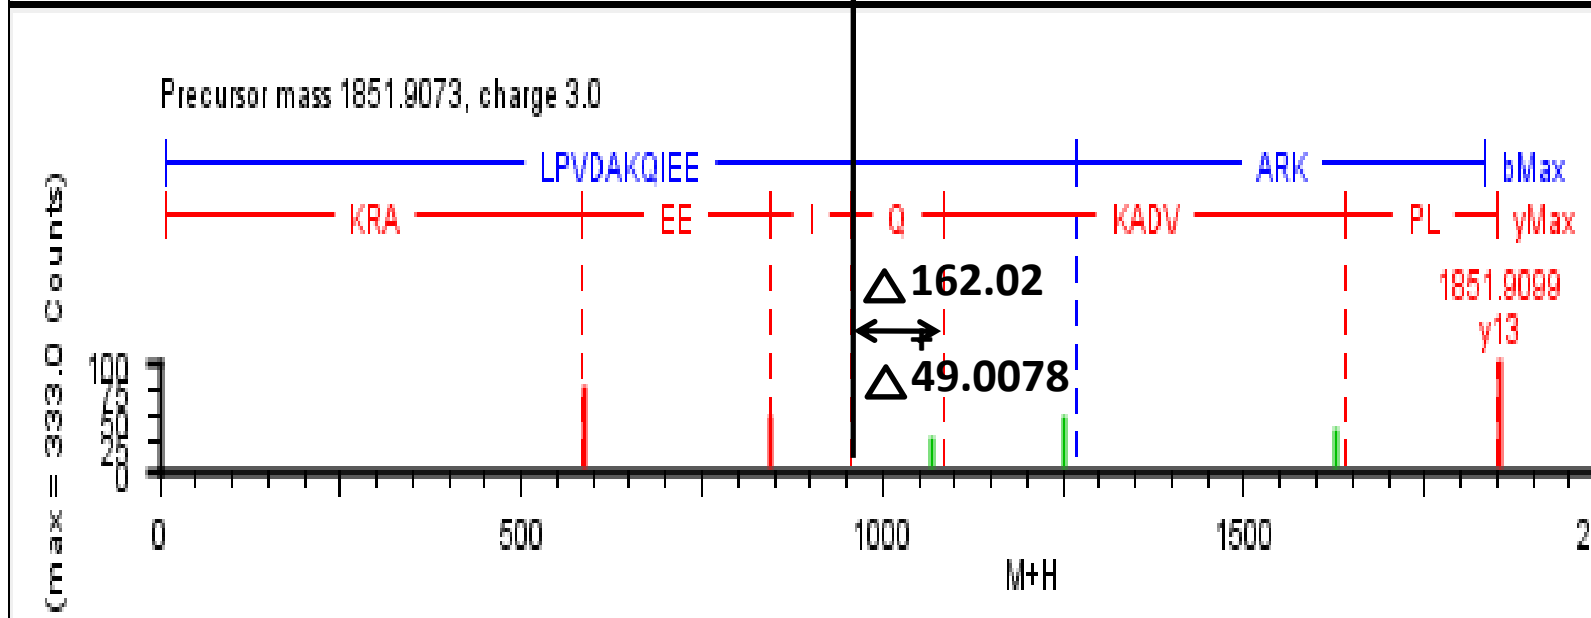

1084.4537  
: (873.40+  
162.02+  
49.0078)

206-218

(K)LPVDAKQIEEAR(Gly)K(MOLD)(I)

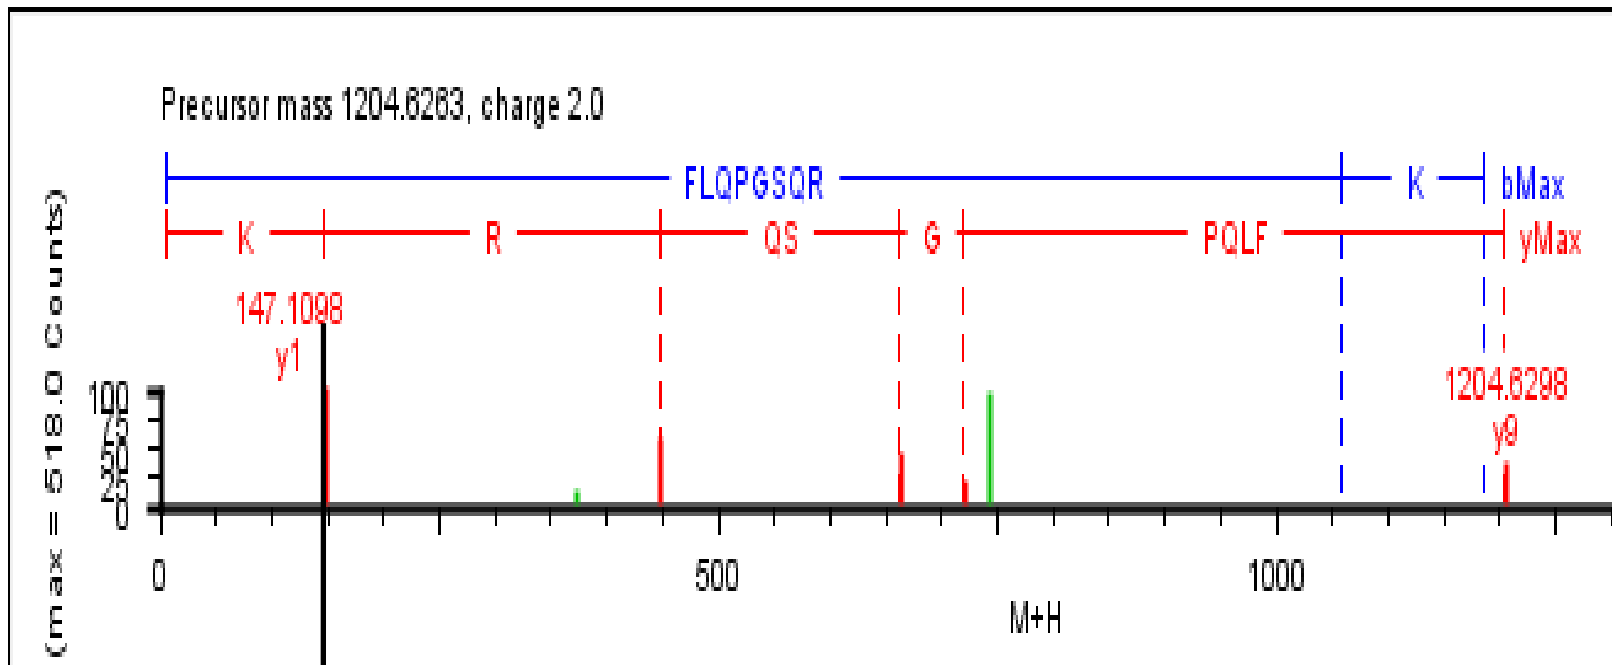

147.1098

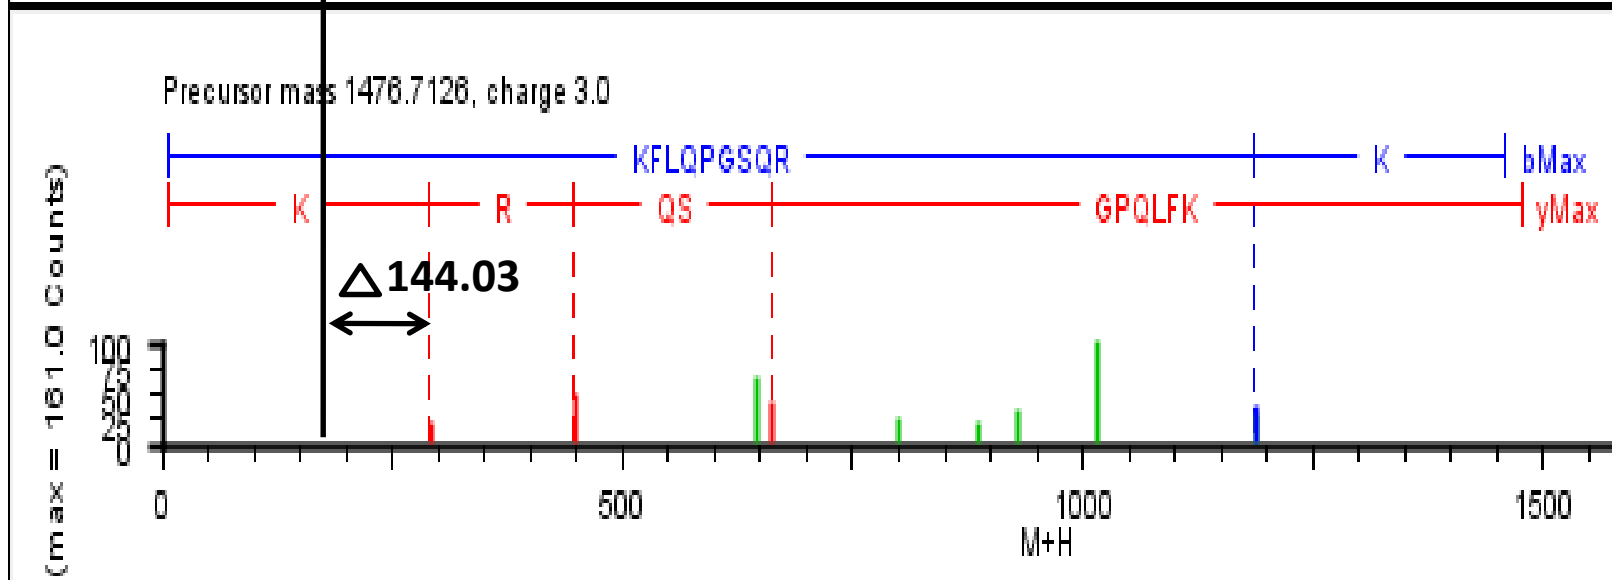

291.1473:  
(147.1098  
+ 144.03)

196-205

(K)KFLQPGSQRK(ImiA)(L)

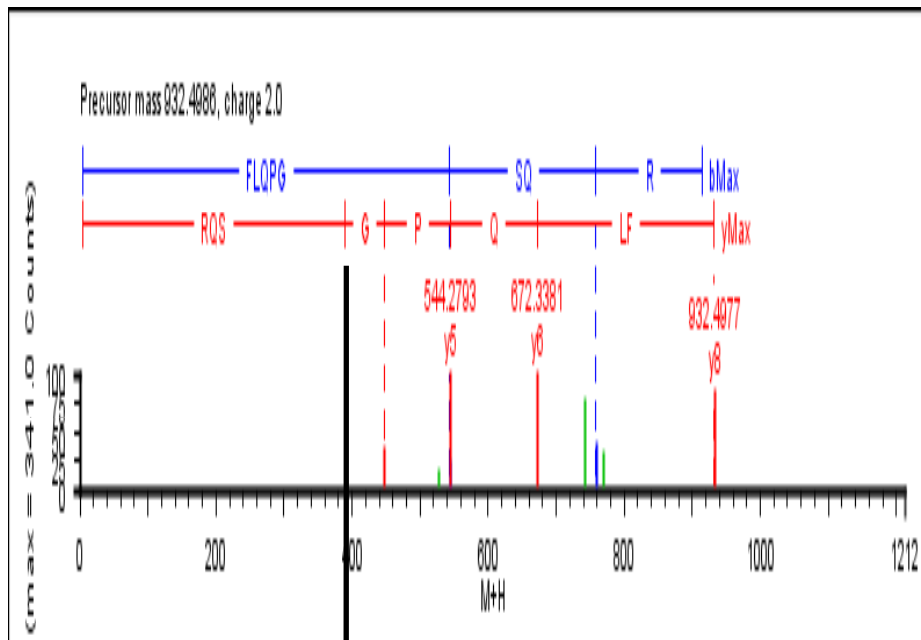

447.2205

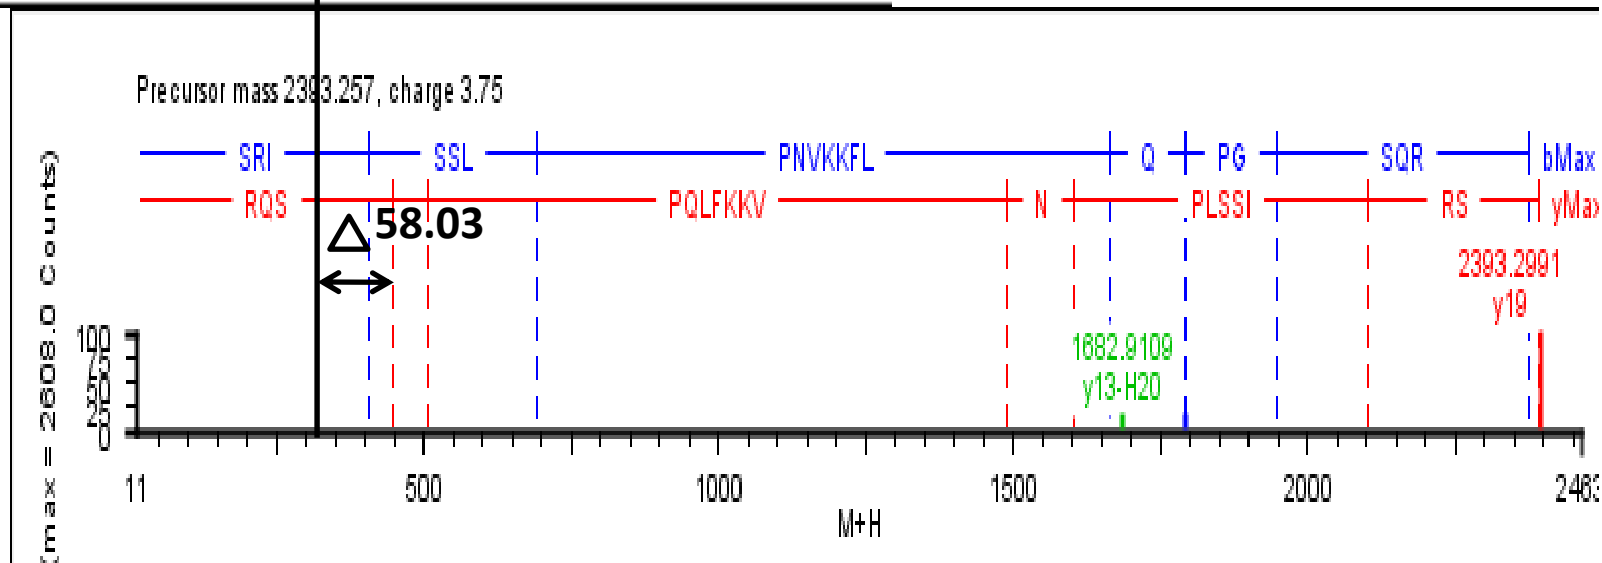

505.232:  
(447.22+  
58.03)

186-204

(K)SRISL PNVKKFLQPGSQ**R**(Pentosidine)(K)

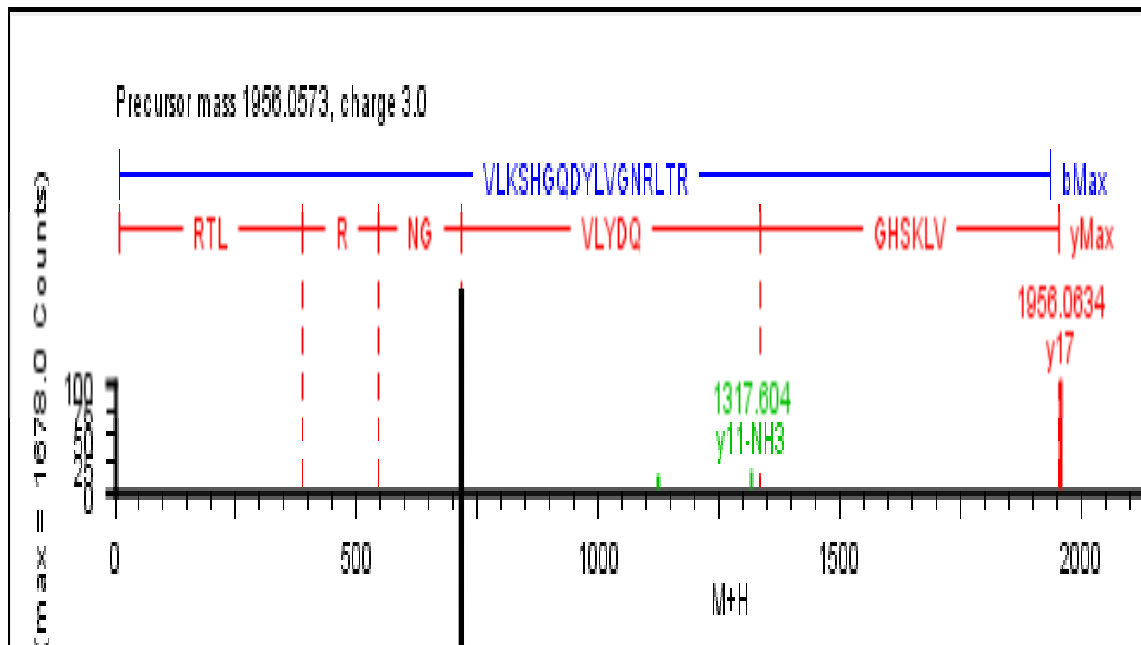

716.3885

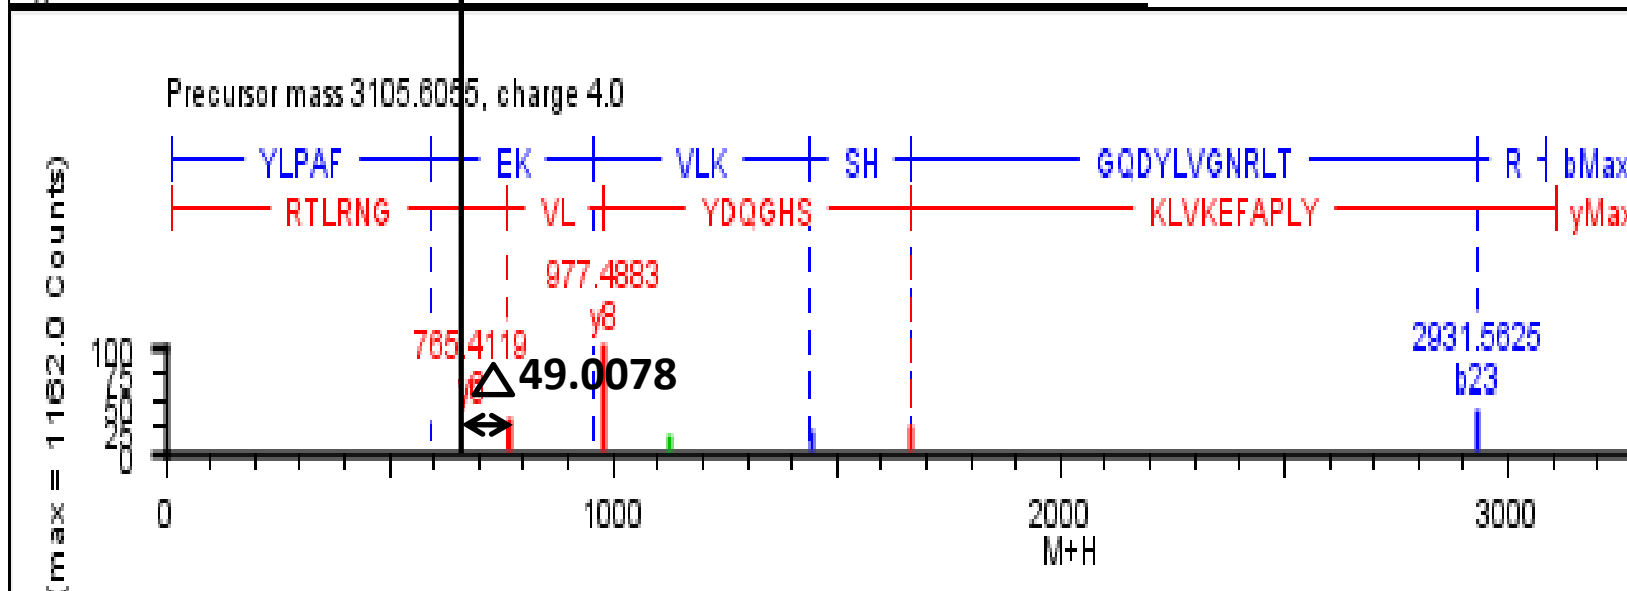

765.4119:  
 (716.38+  
 49.00)

132-155

(R)YLPAFEKVLKSHGQDYLVGN**R(MOLD)**LTR((V)

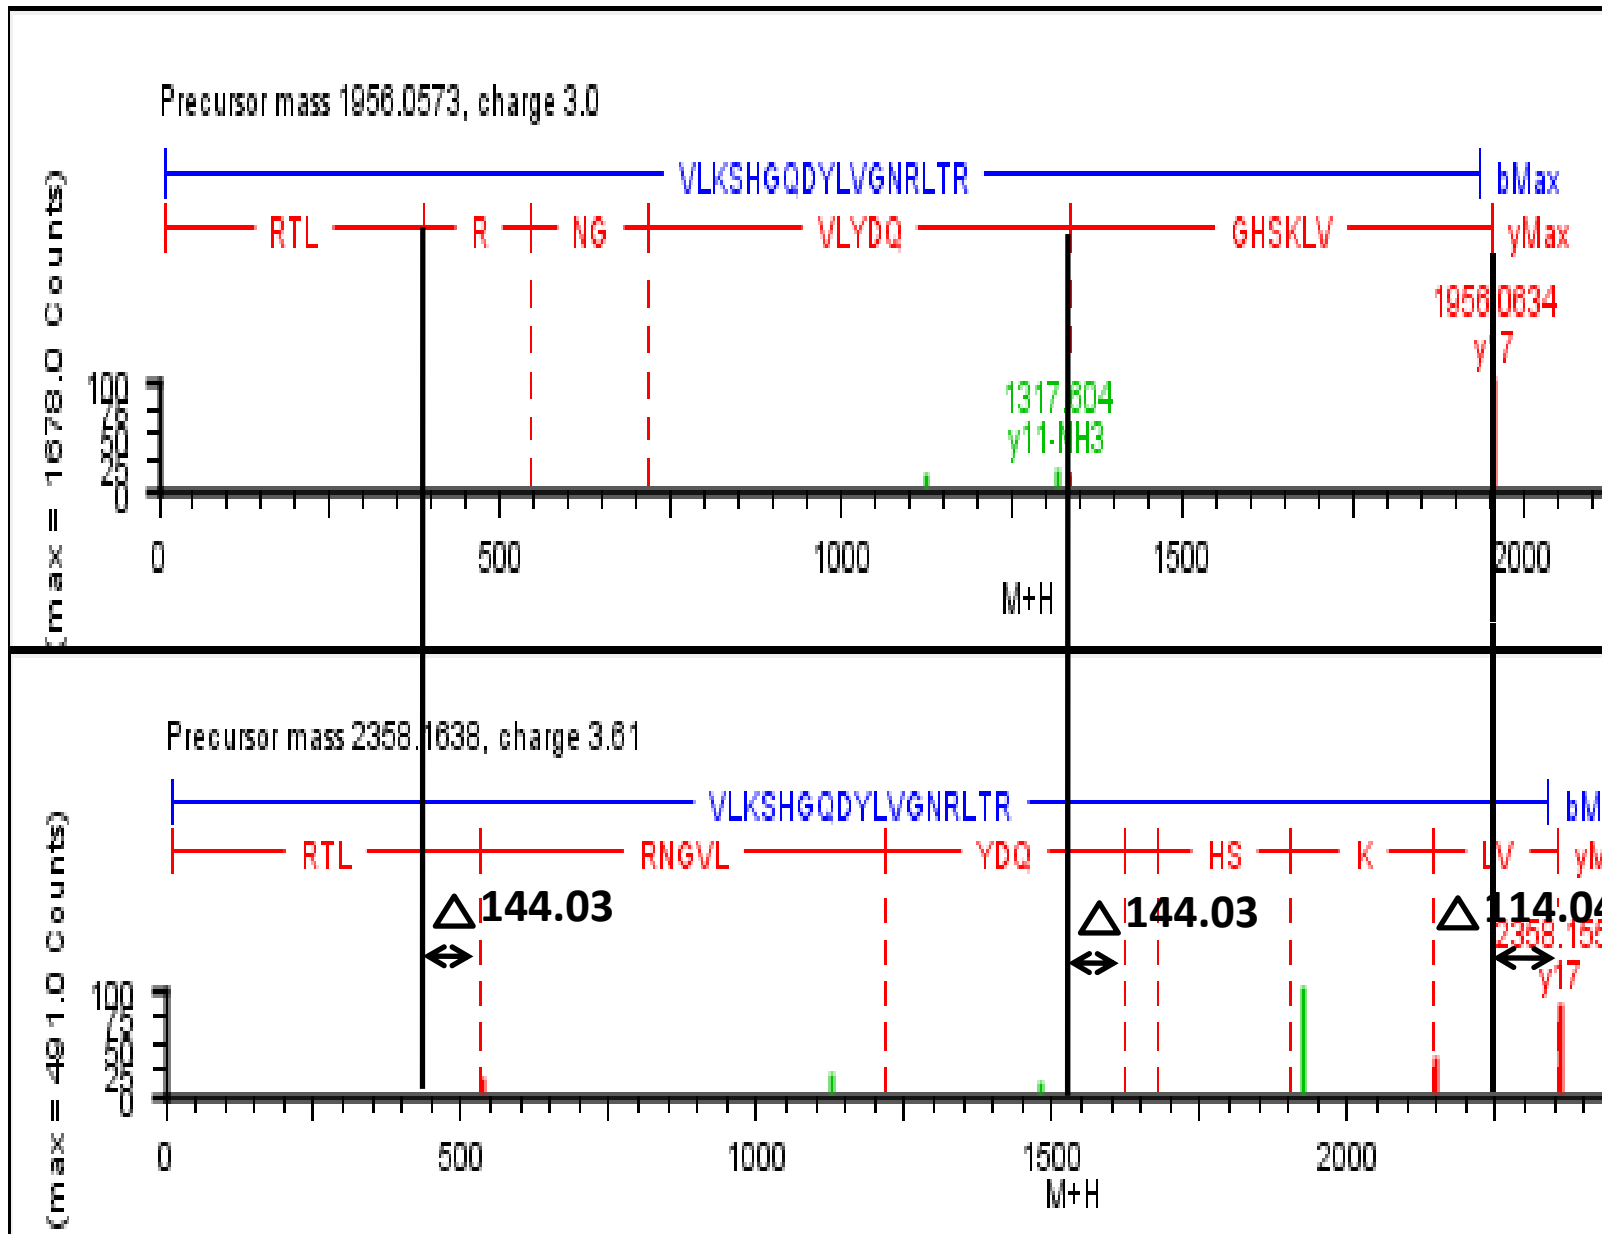

1956.0634

2358.1558:  
 (1956.06+  
 114.04+  
 144.03+  
 144.03)

139-155

(K)VLK(Ubi)SHGQDYLVGNR(ImiA)LTR(ImiA)(V)

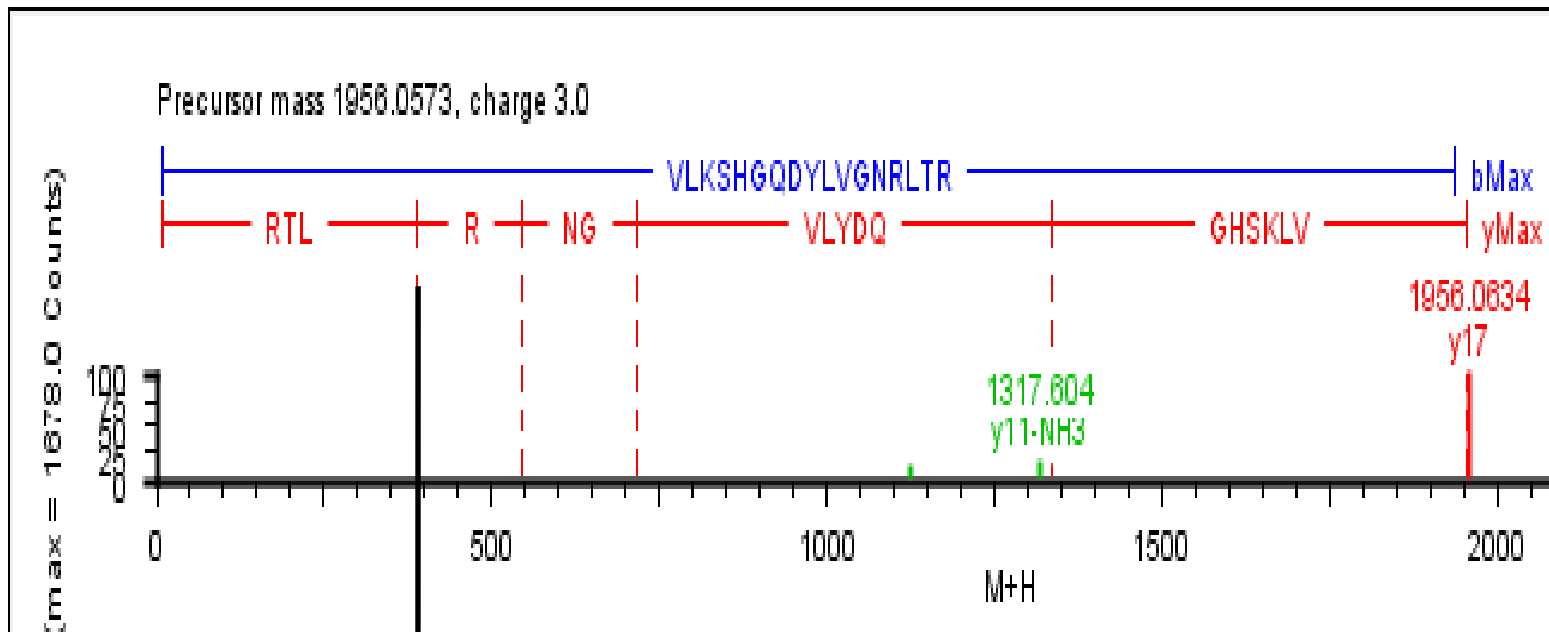

**389.2514**

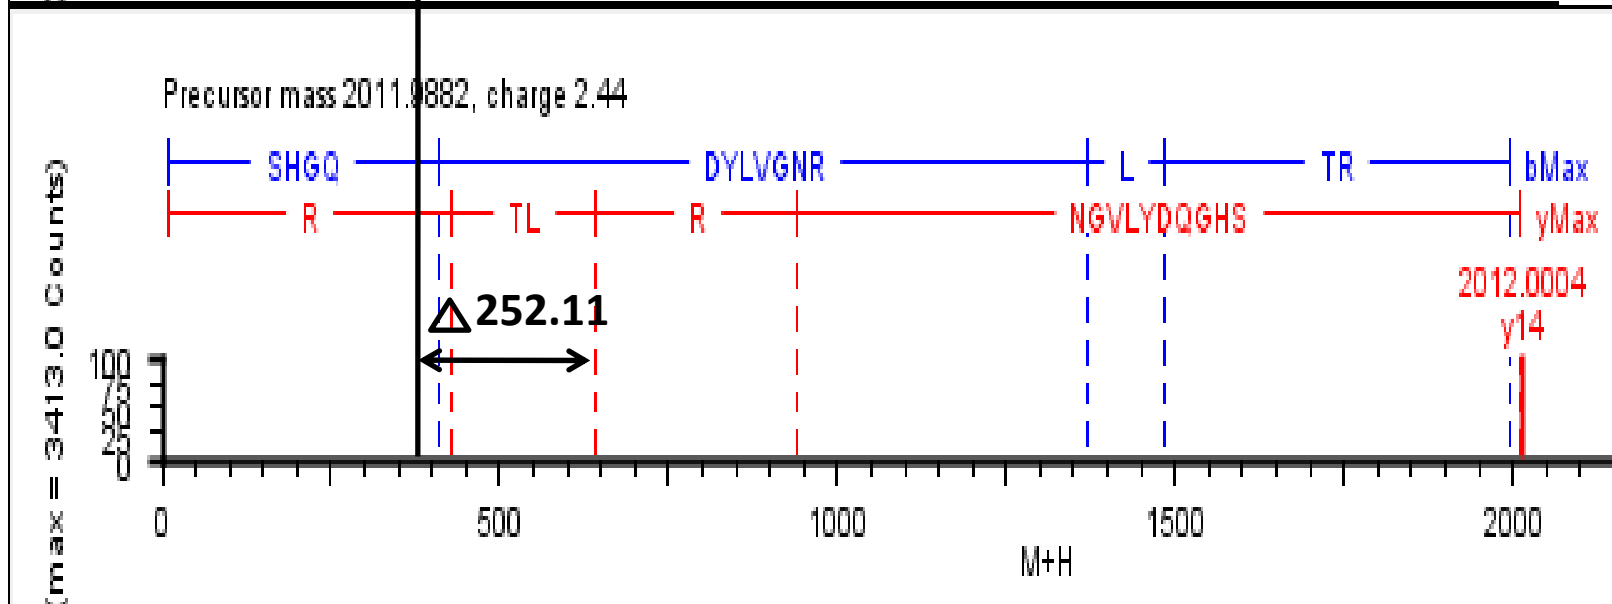

**641.3743:**  
**(389.25+**  
**252.11)**

**142-155**

**(K)SHGQDYLVGNRLTR(Crossline)(V)**

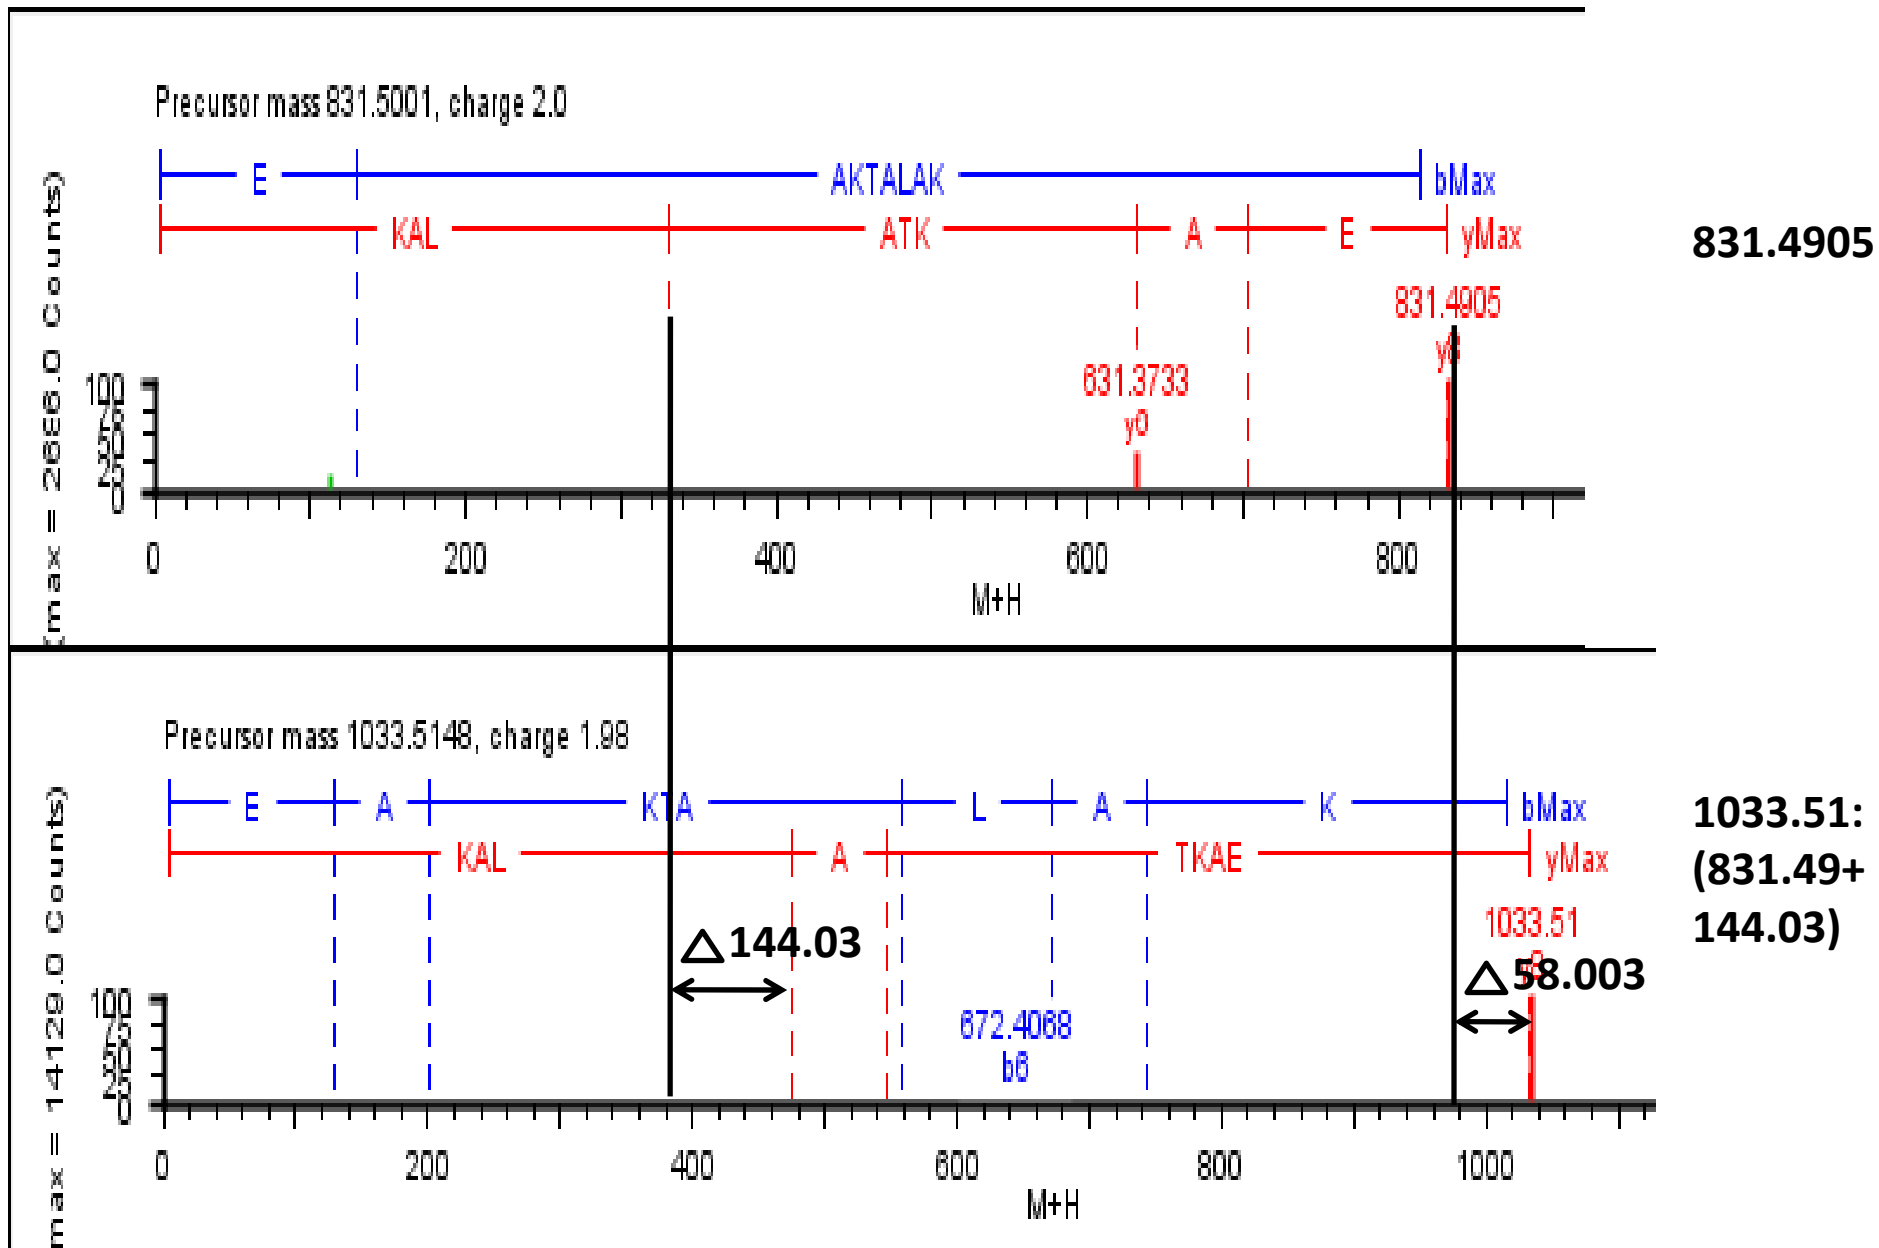

118-125

(K)EAK(CML)TALAK(lmiA)(D)



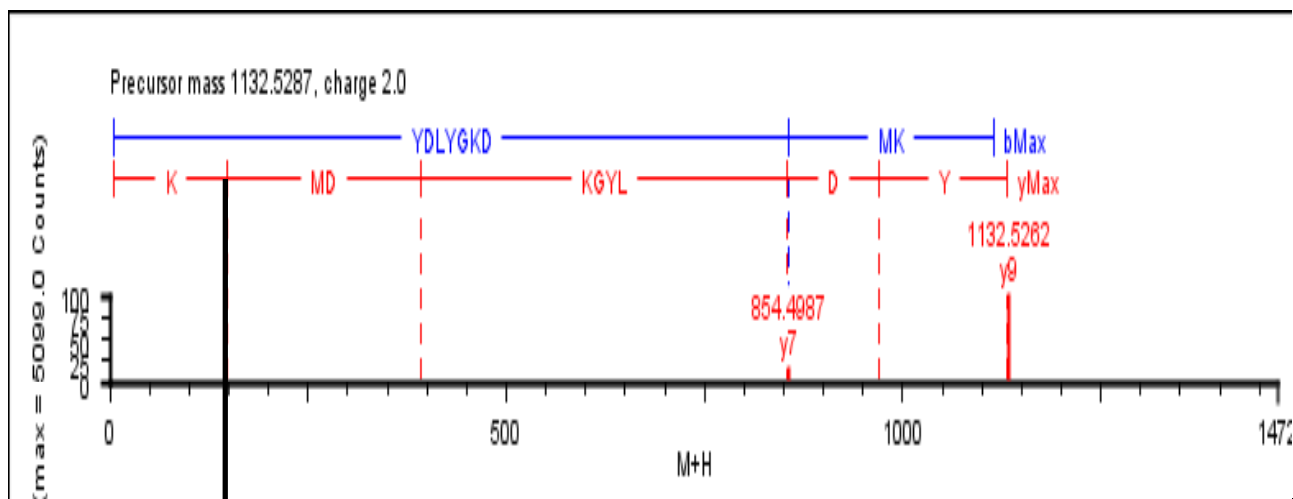

147.11

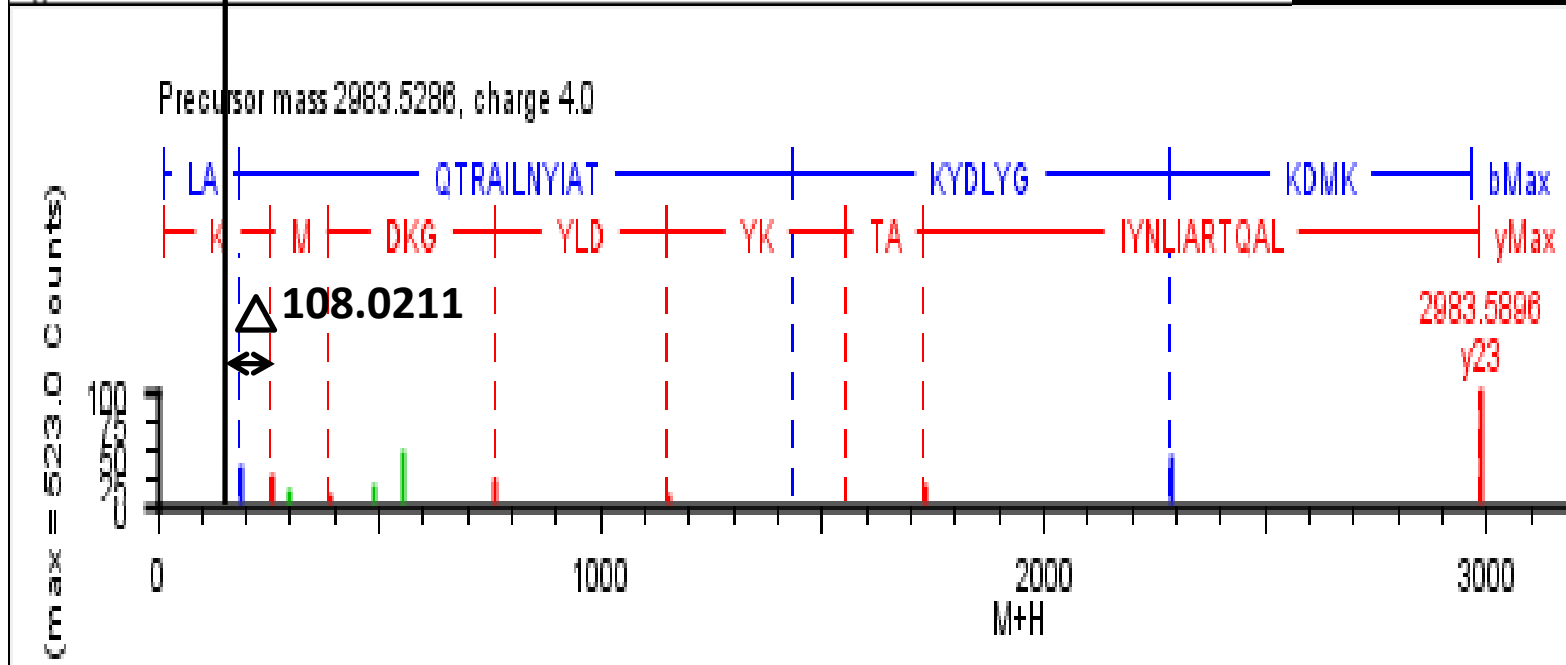

255.1422:  
(147.11+  
108.02)

79-87

(K)YDLYGKDMK(Pyr)(E)

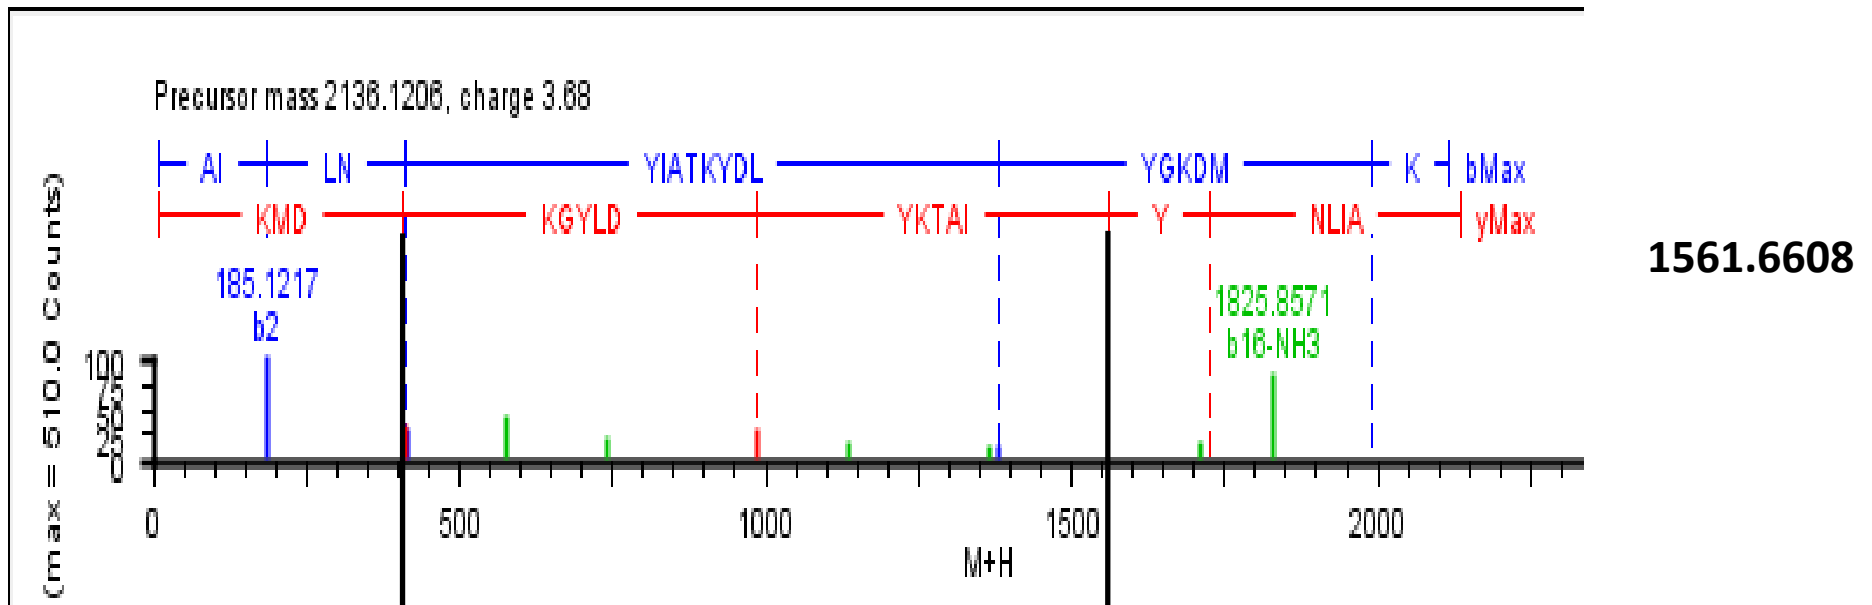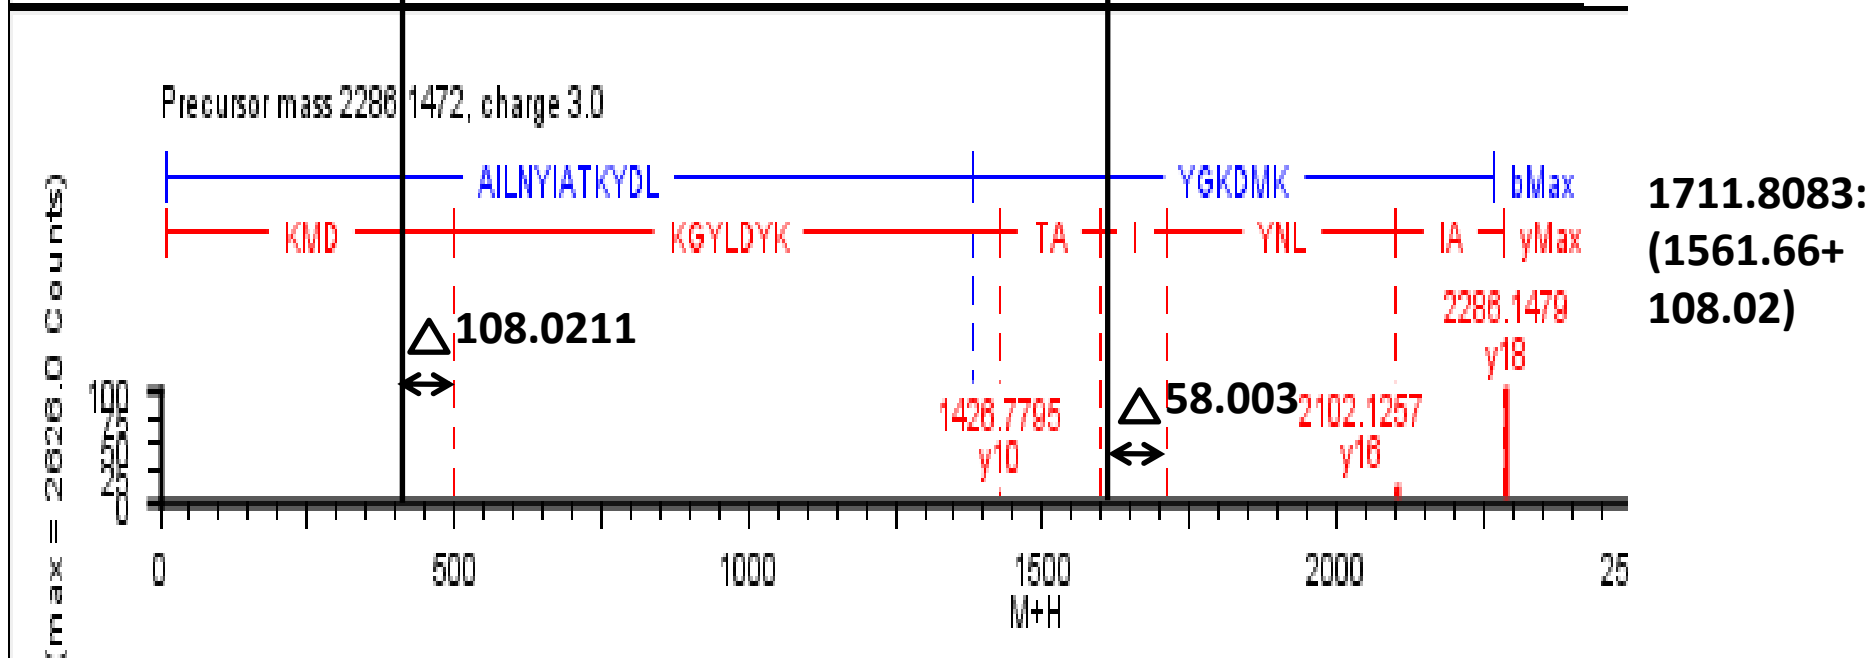

70-87

(R)AILNYIATKYDLYGK(CML)DMK(Pyr)(E)

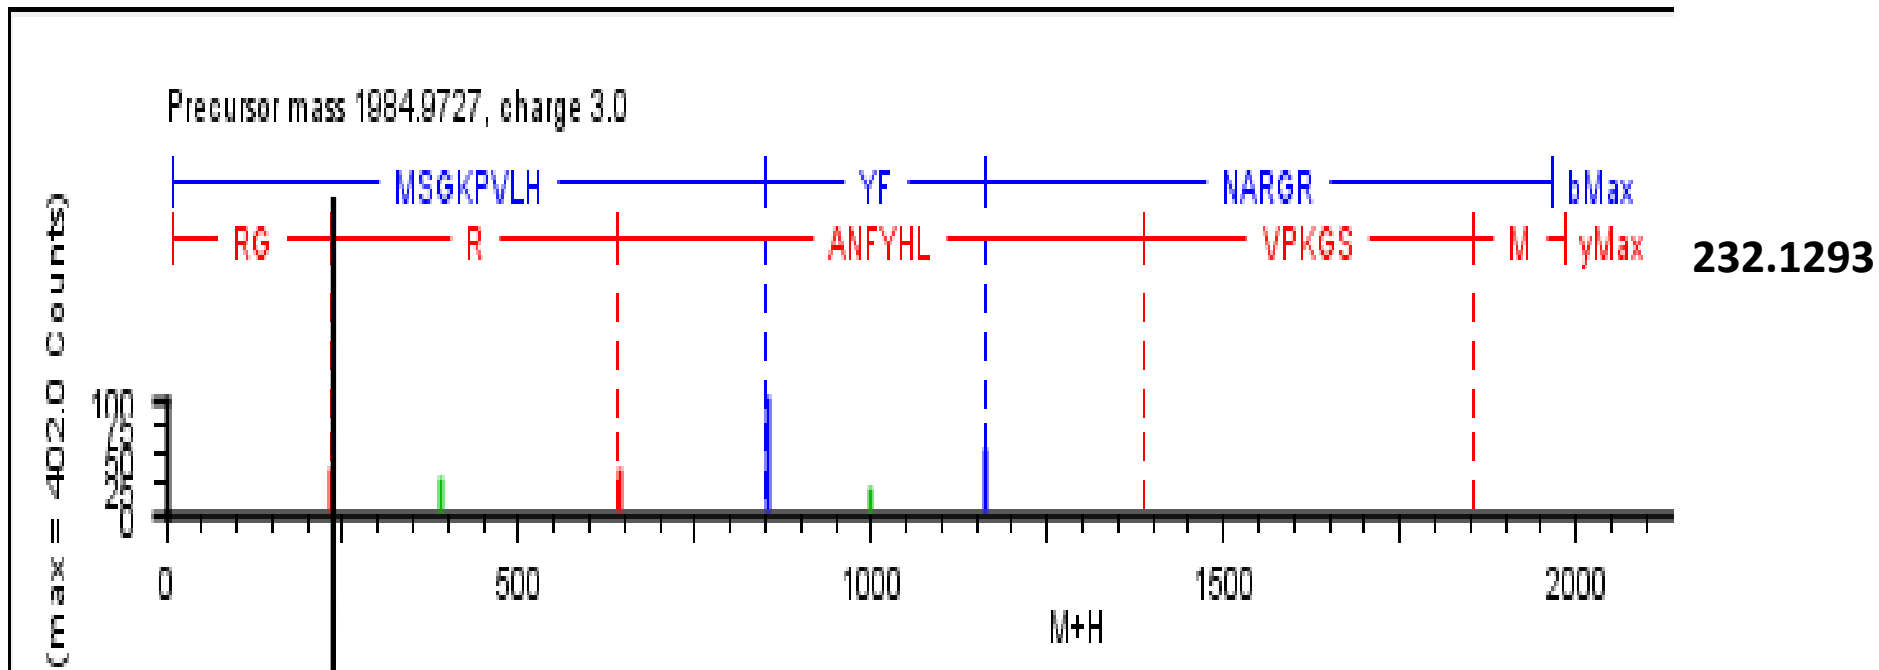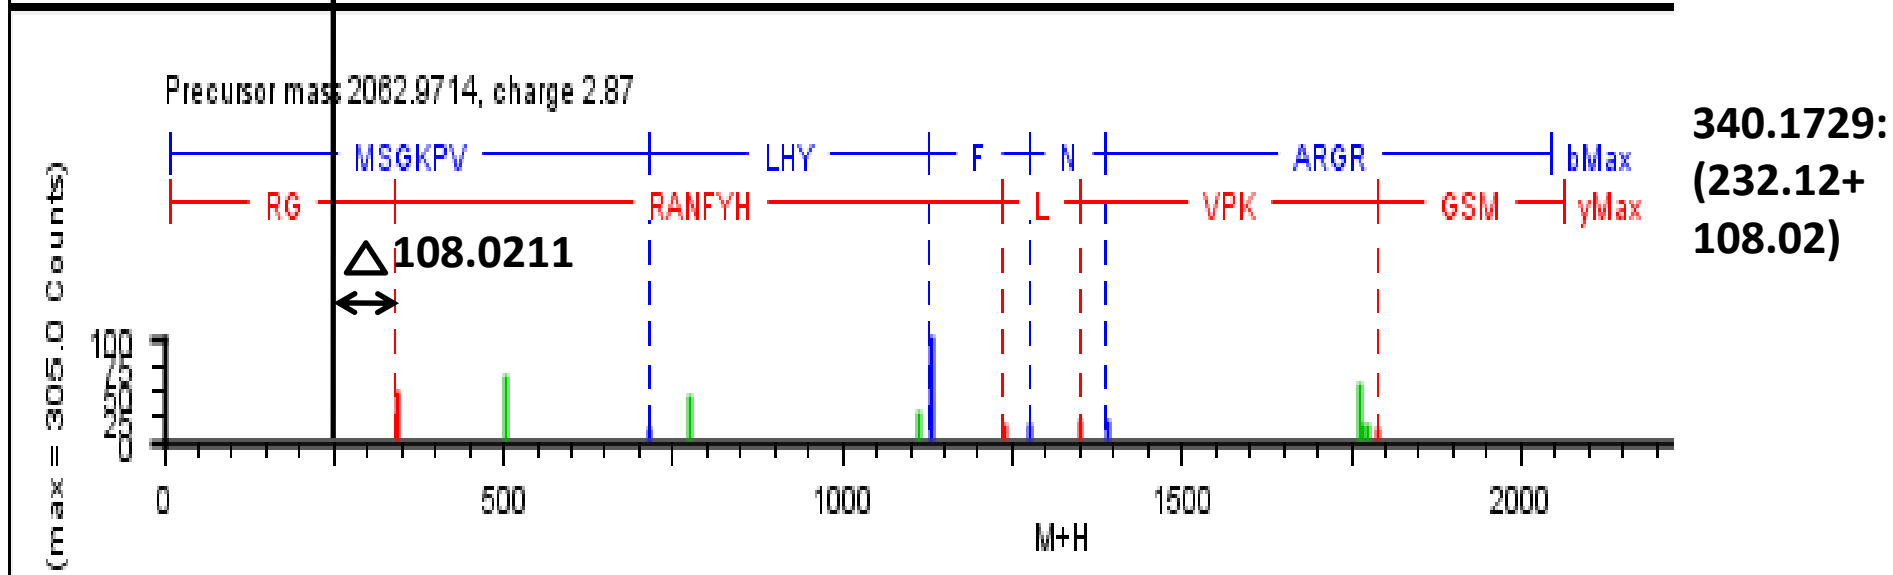

1-15

(-)**MSGKPV**LHYFN**ARGR**(Pyr)(M)

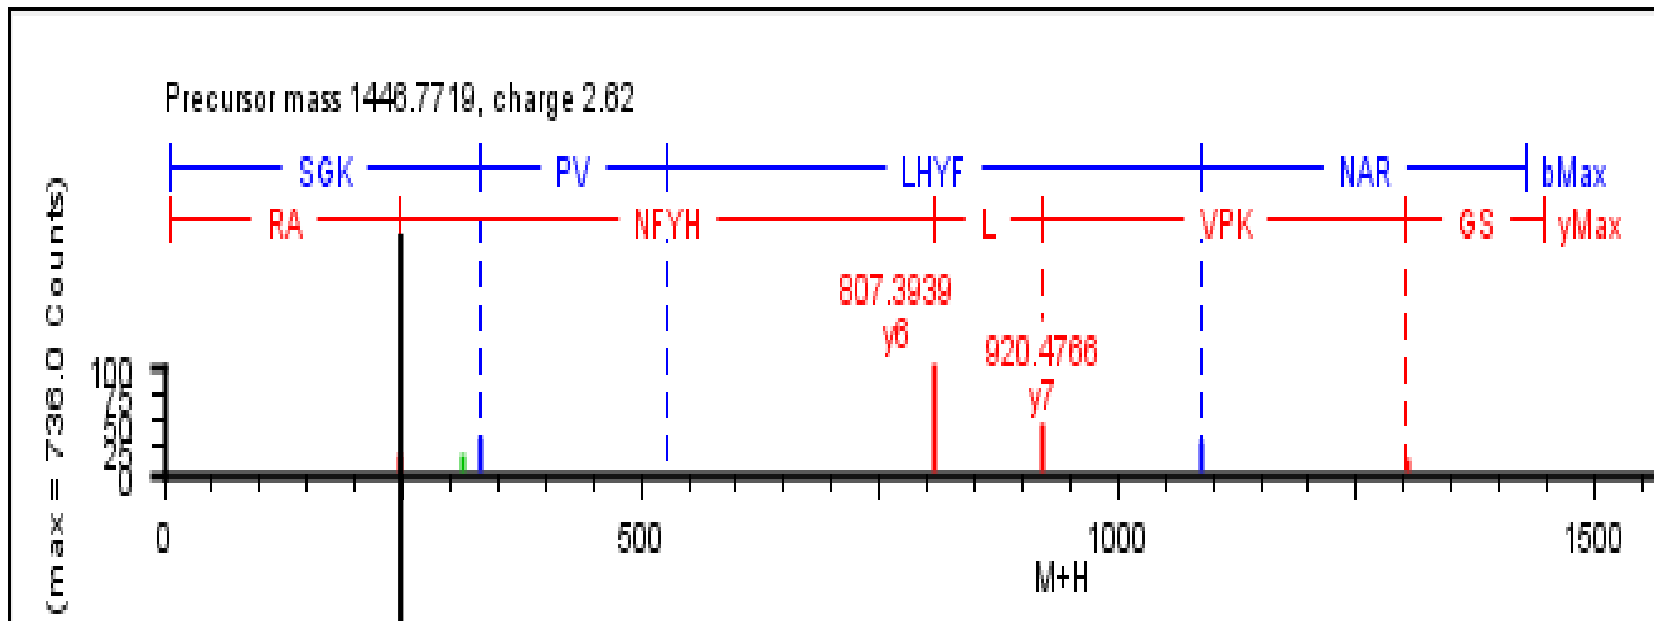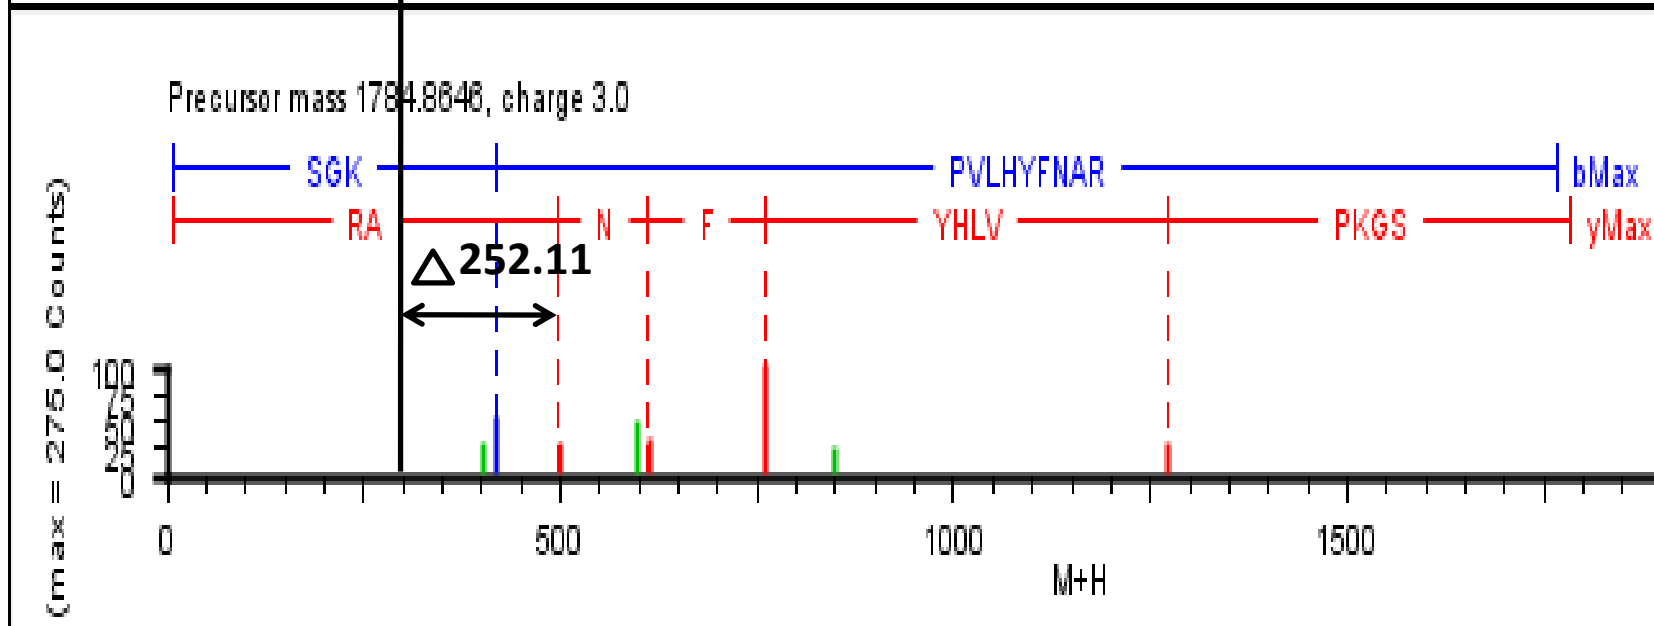

2-13

(M)SGKPVLHYFNAR(Crossline)(G)

FBPA

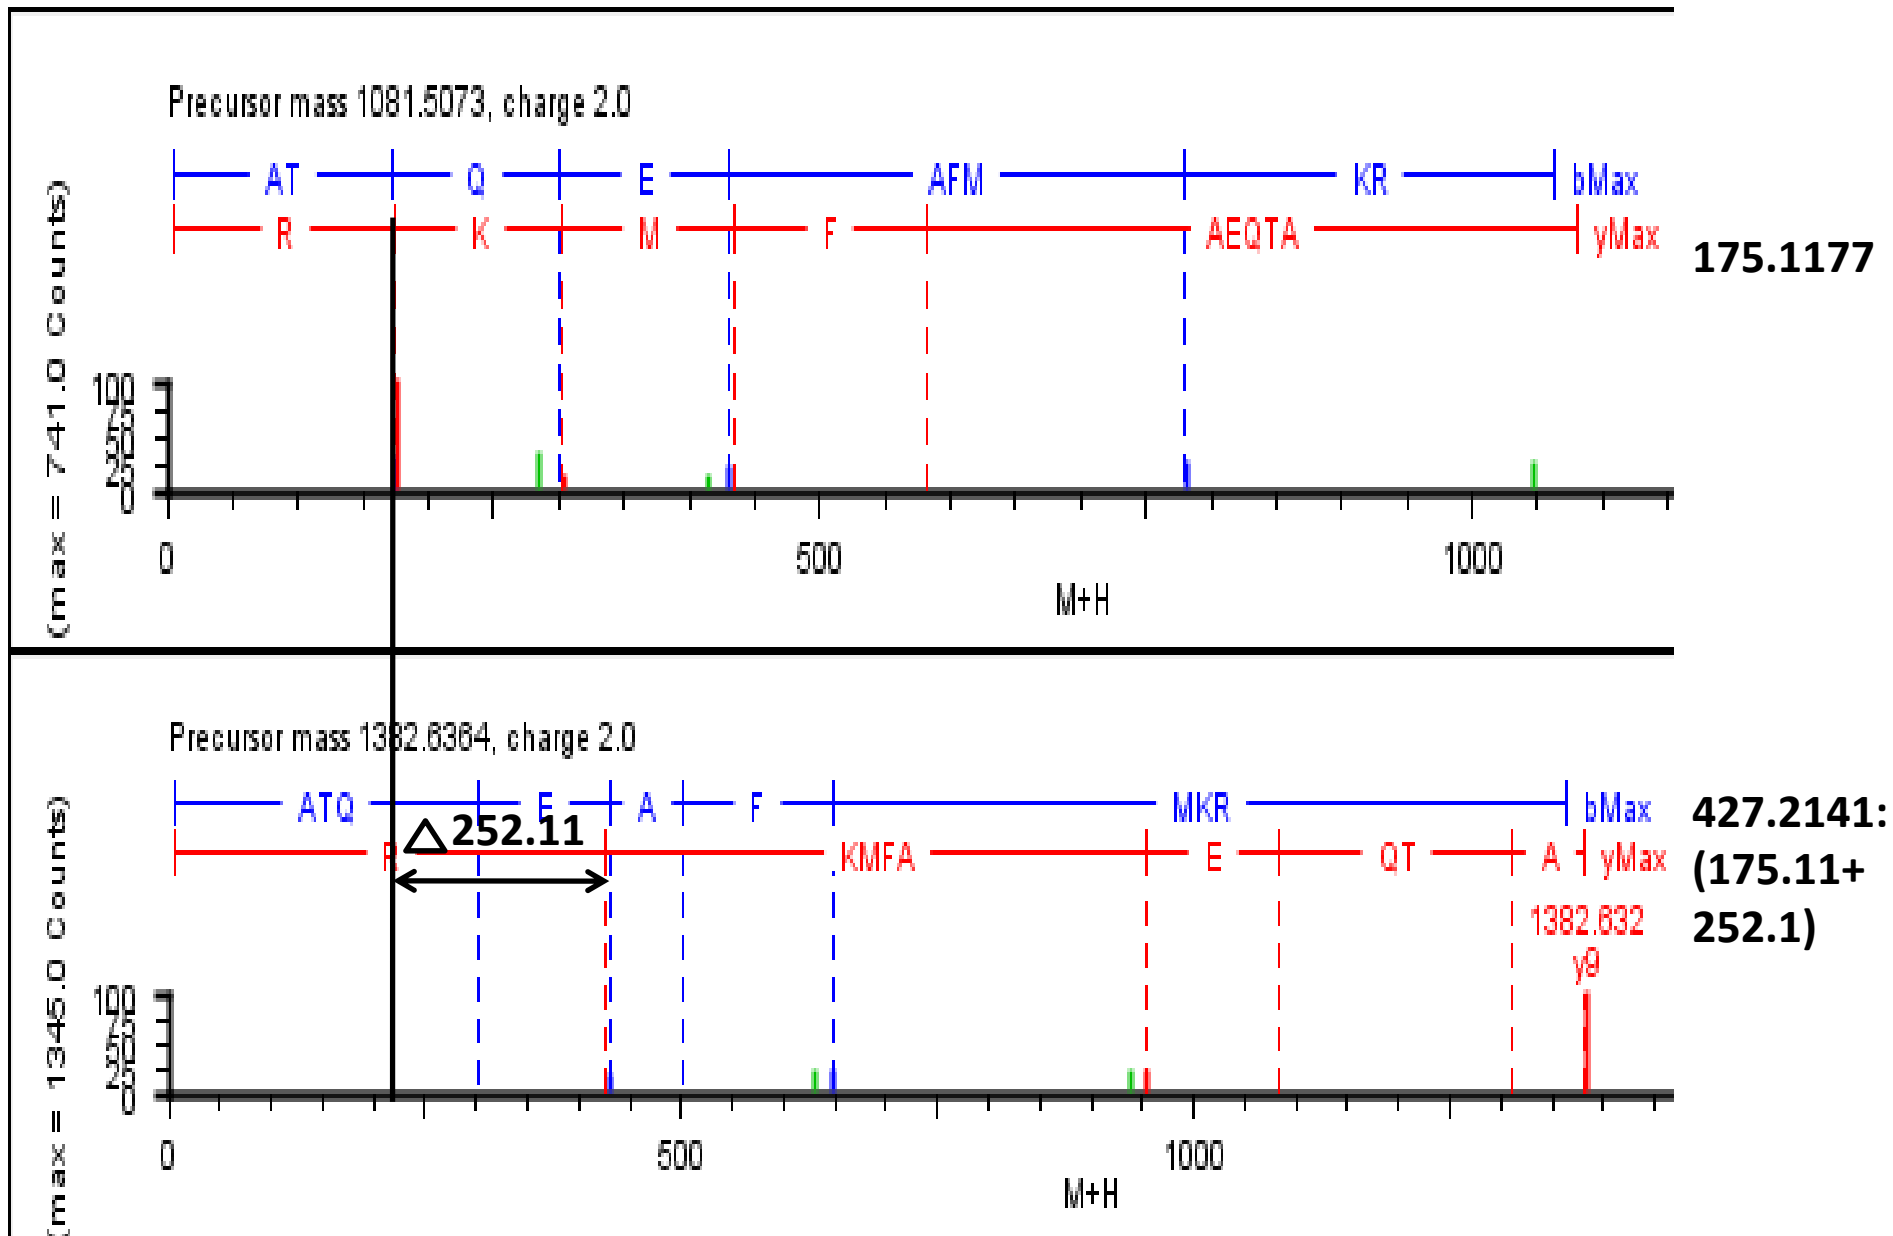

323-331

(K)ATQEAQAFMKR(Crossline)(A)

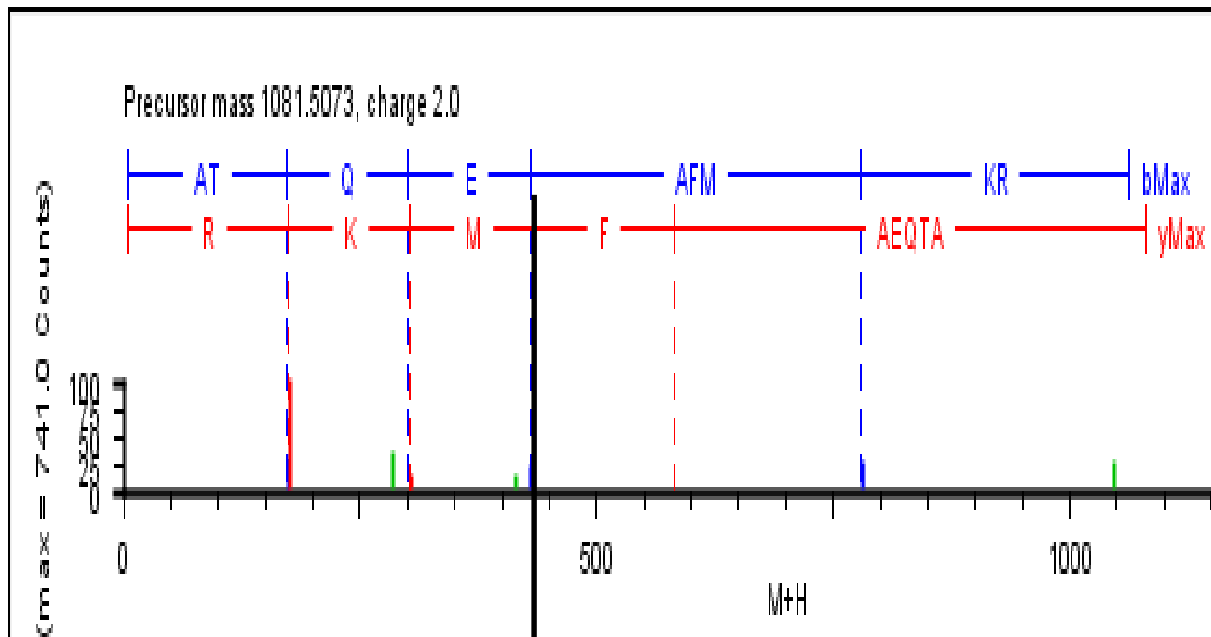

434.2673

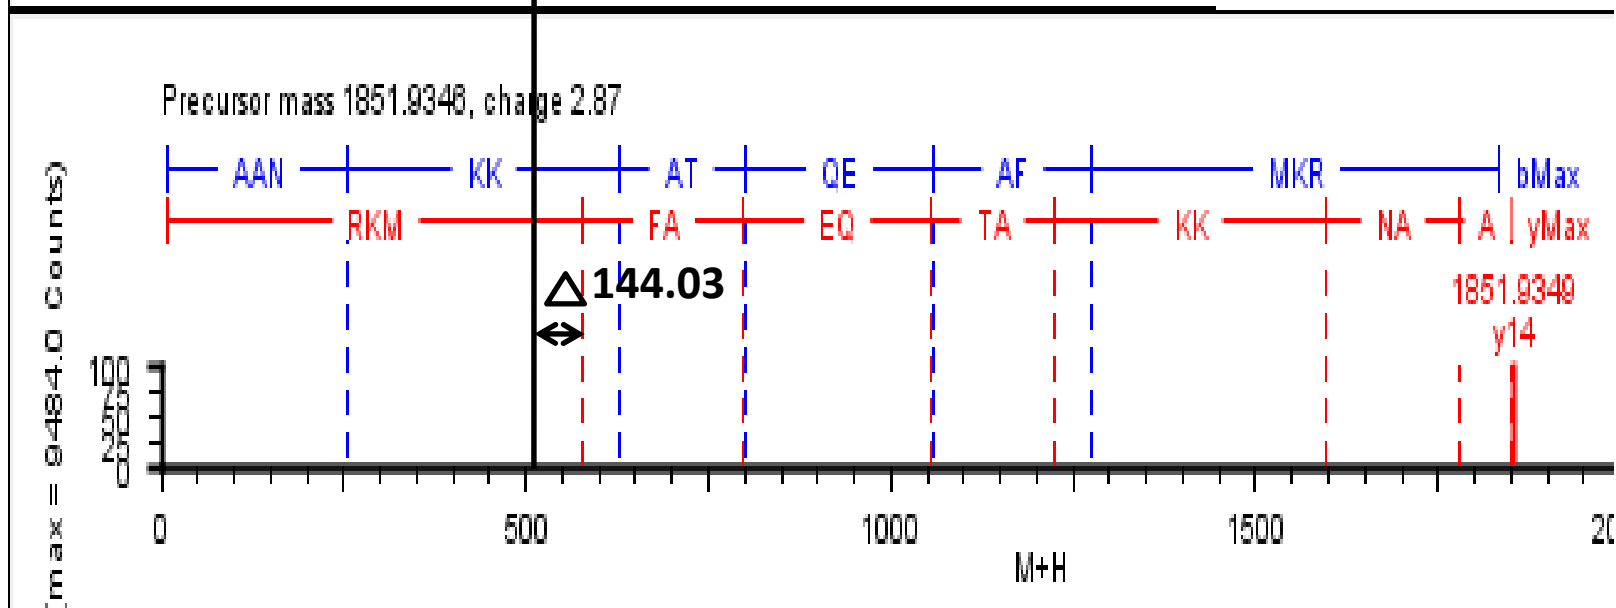

578.2823:  
(434.26+  
144.03)

318-331

(K)AANKKATQEAFMK(ImiA)R(A)

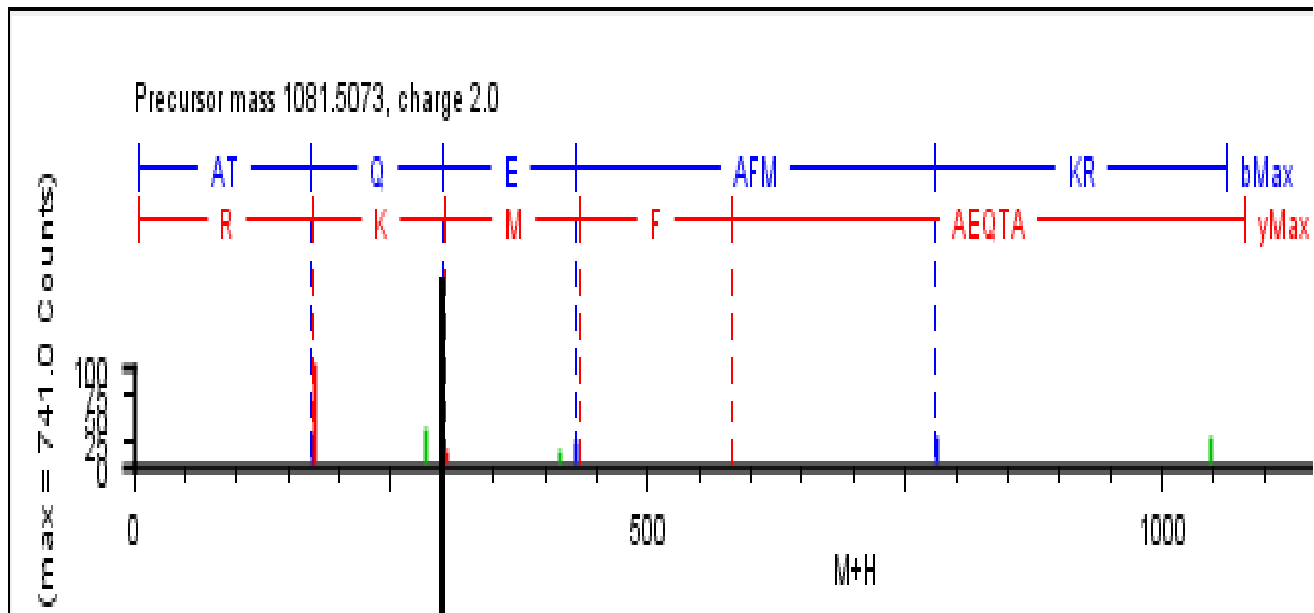

303.2136

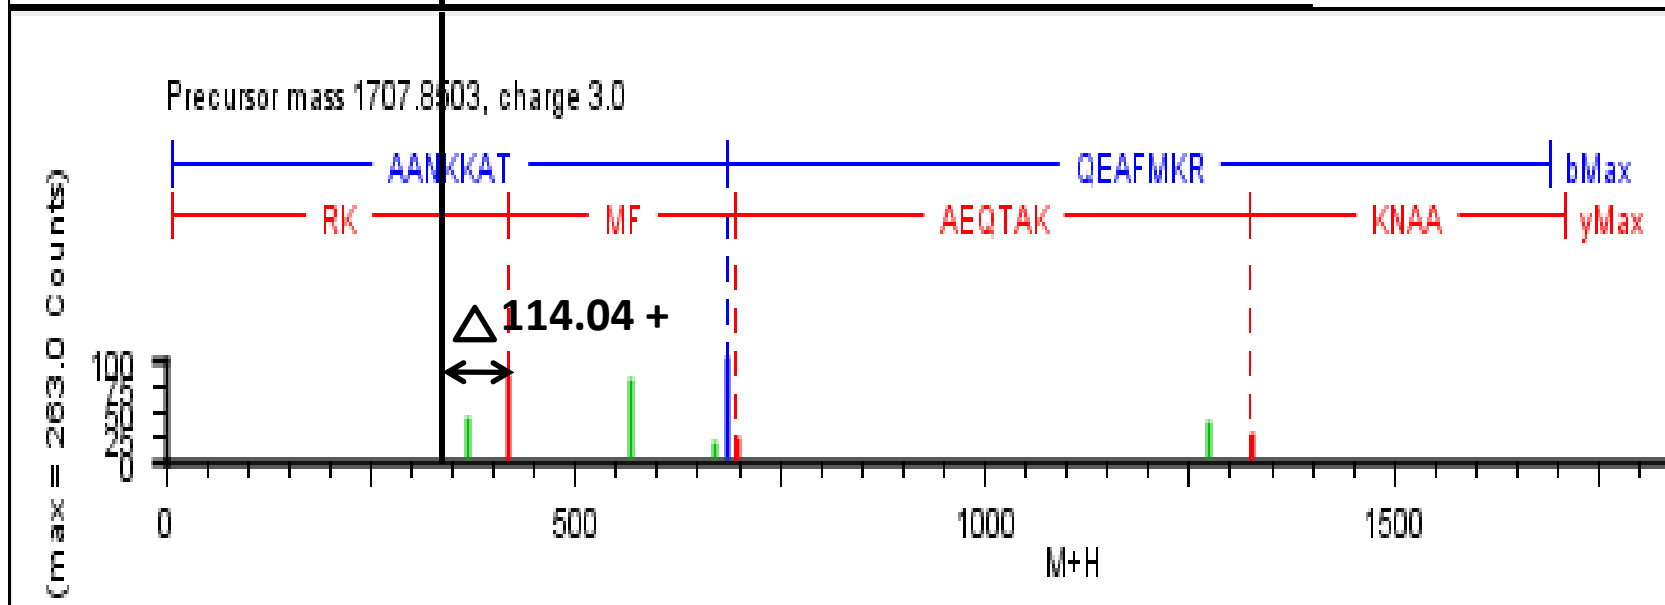

417.2569:  
(303.21+  
114.04)

318-331

(K)AANKKATQEAFMK(Ubi)R(A)



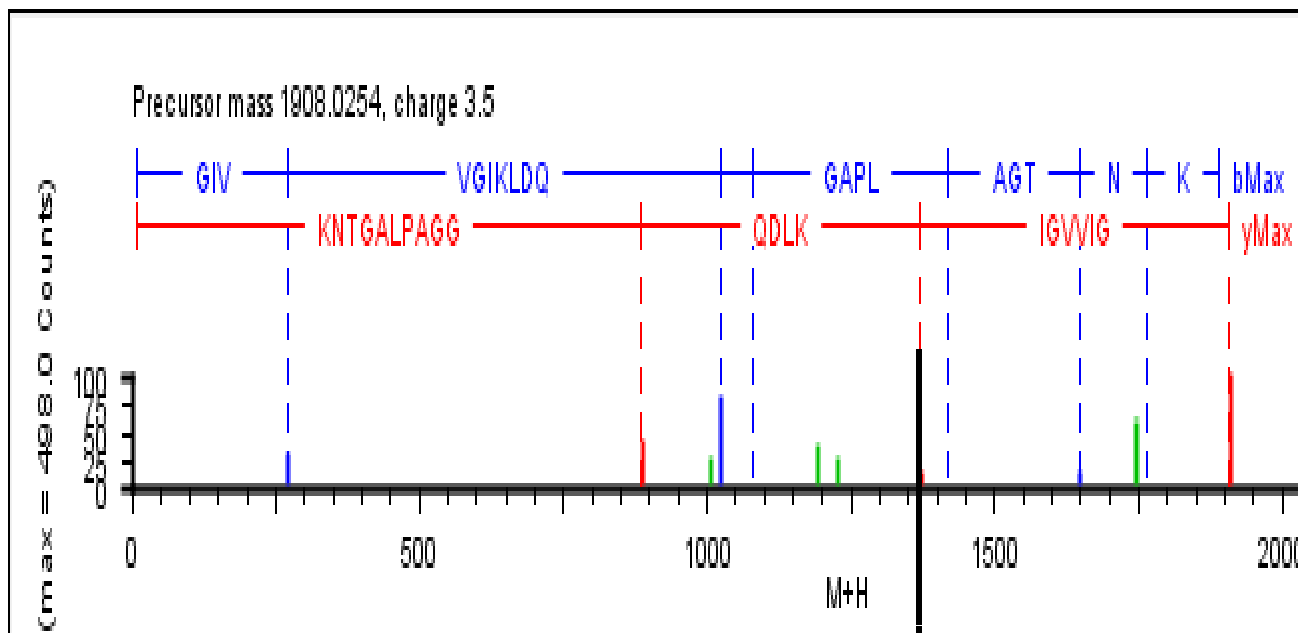

1369.3607

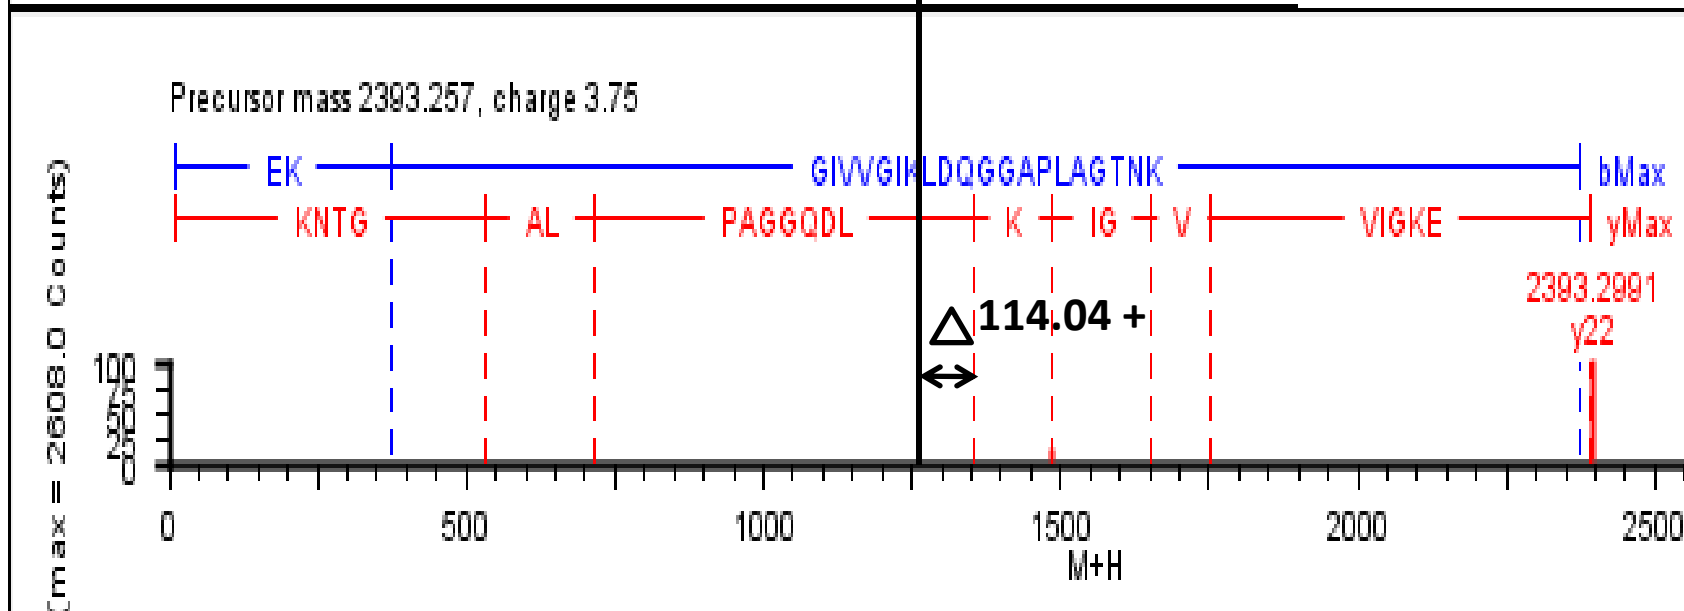

1483.7935:  
(1369.36+  
114.04)

100-121

(K)EKGIVVGIKLDQGGAPLAGTNK(Ubi)(E)

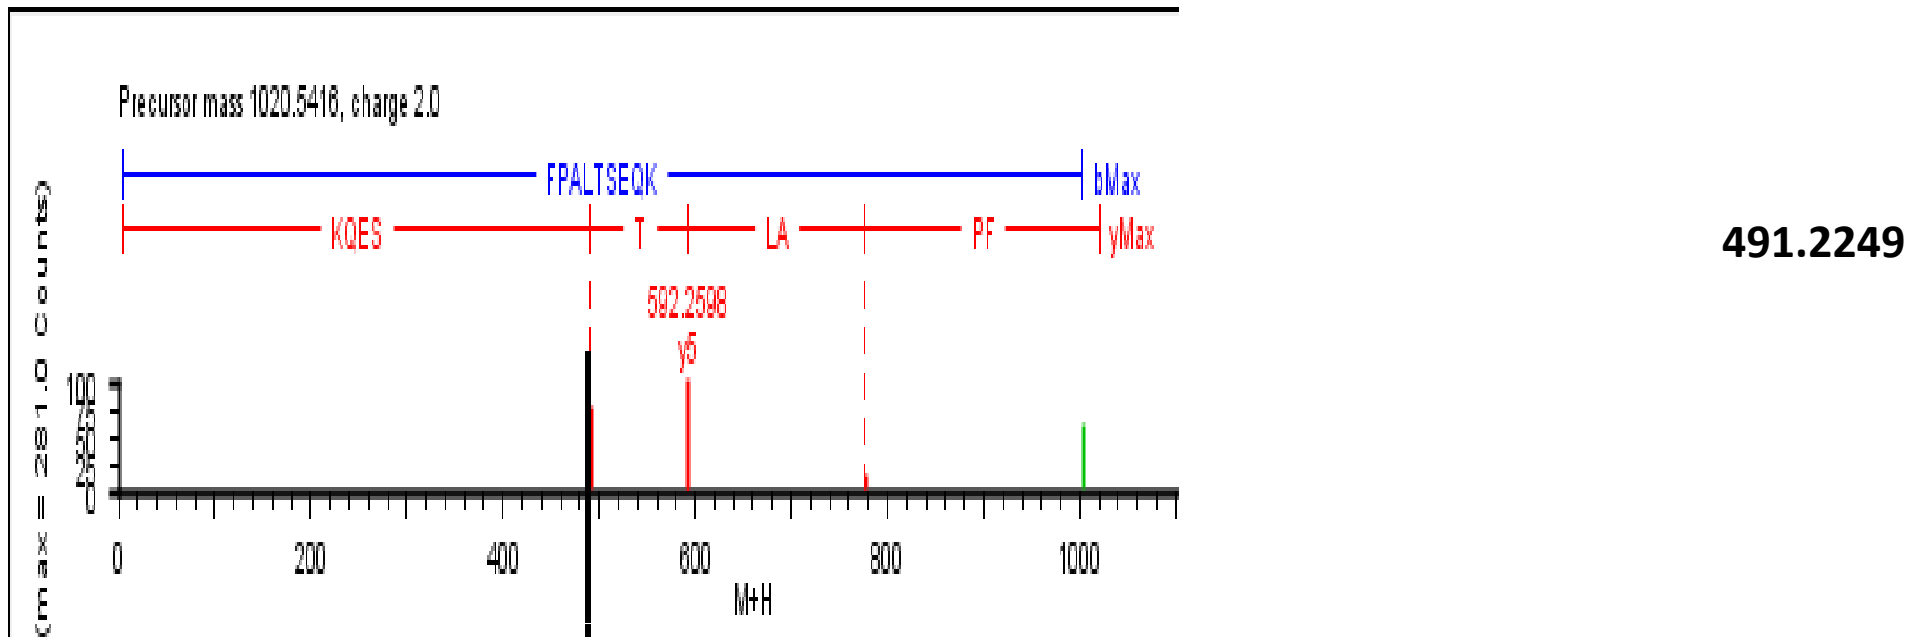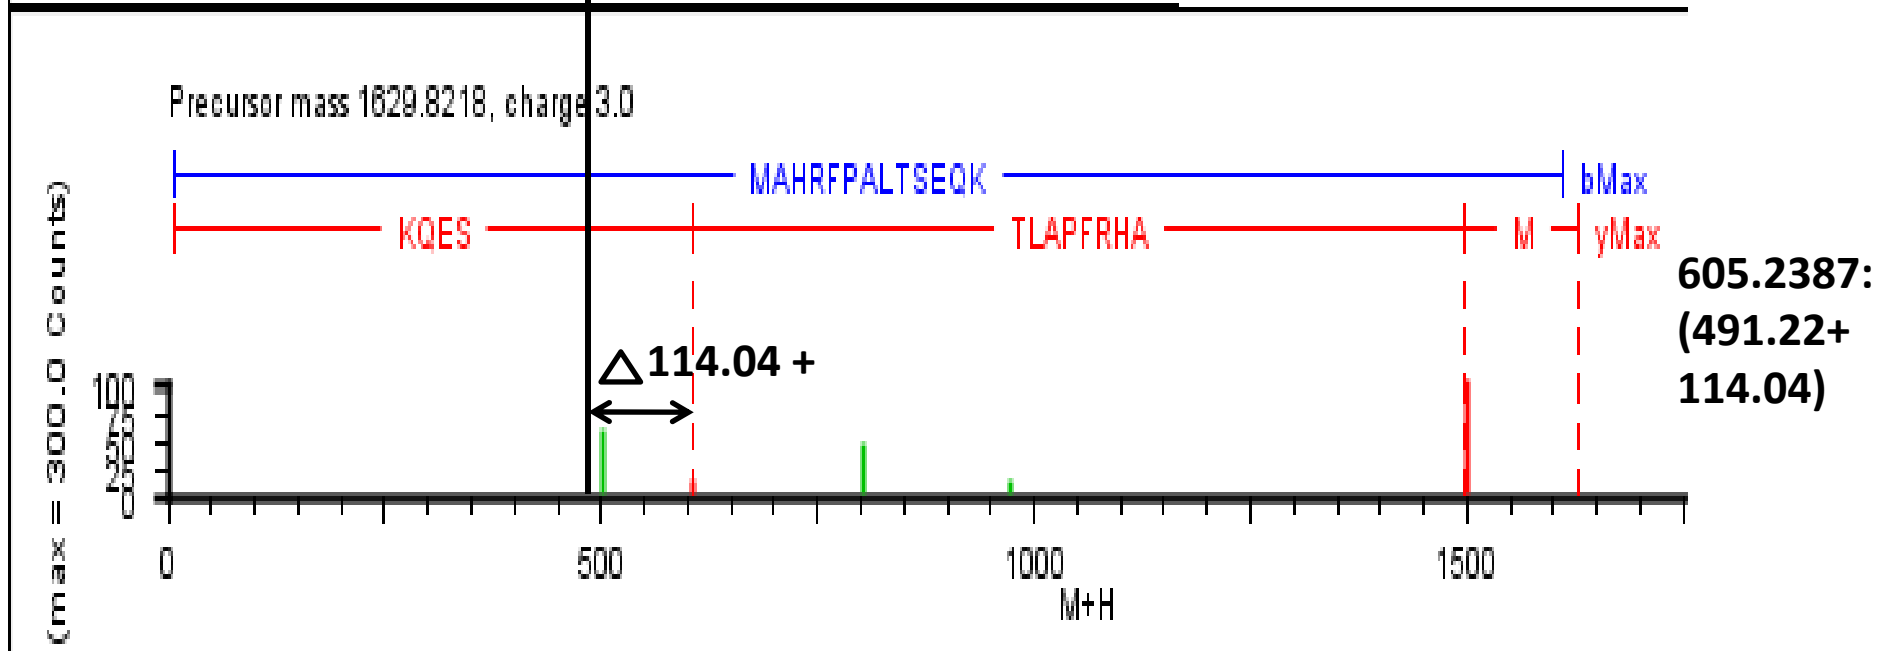

1- 13

(-)MAHRFPALTSEQK(Ubi)(K)

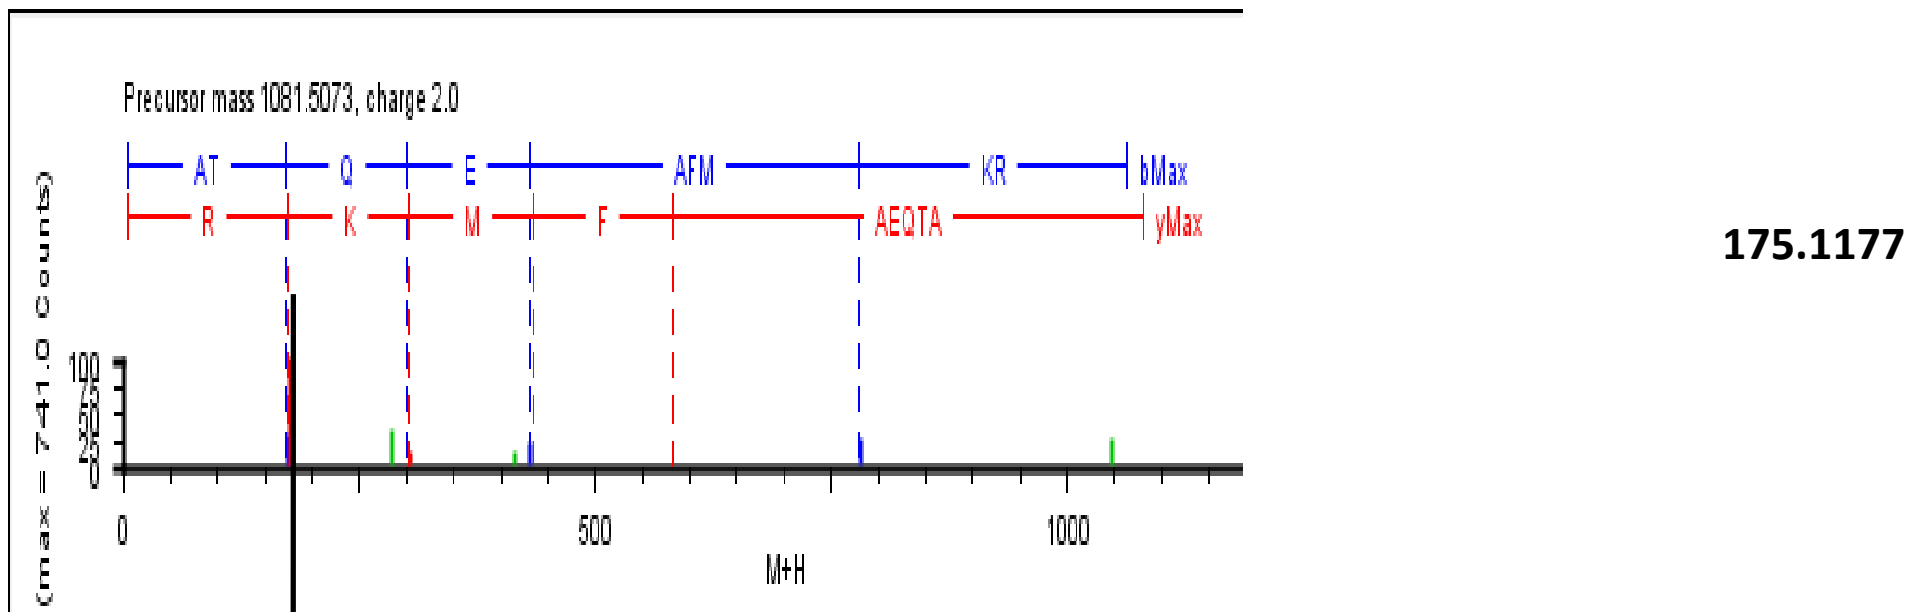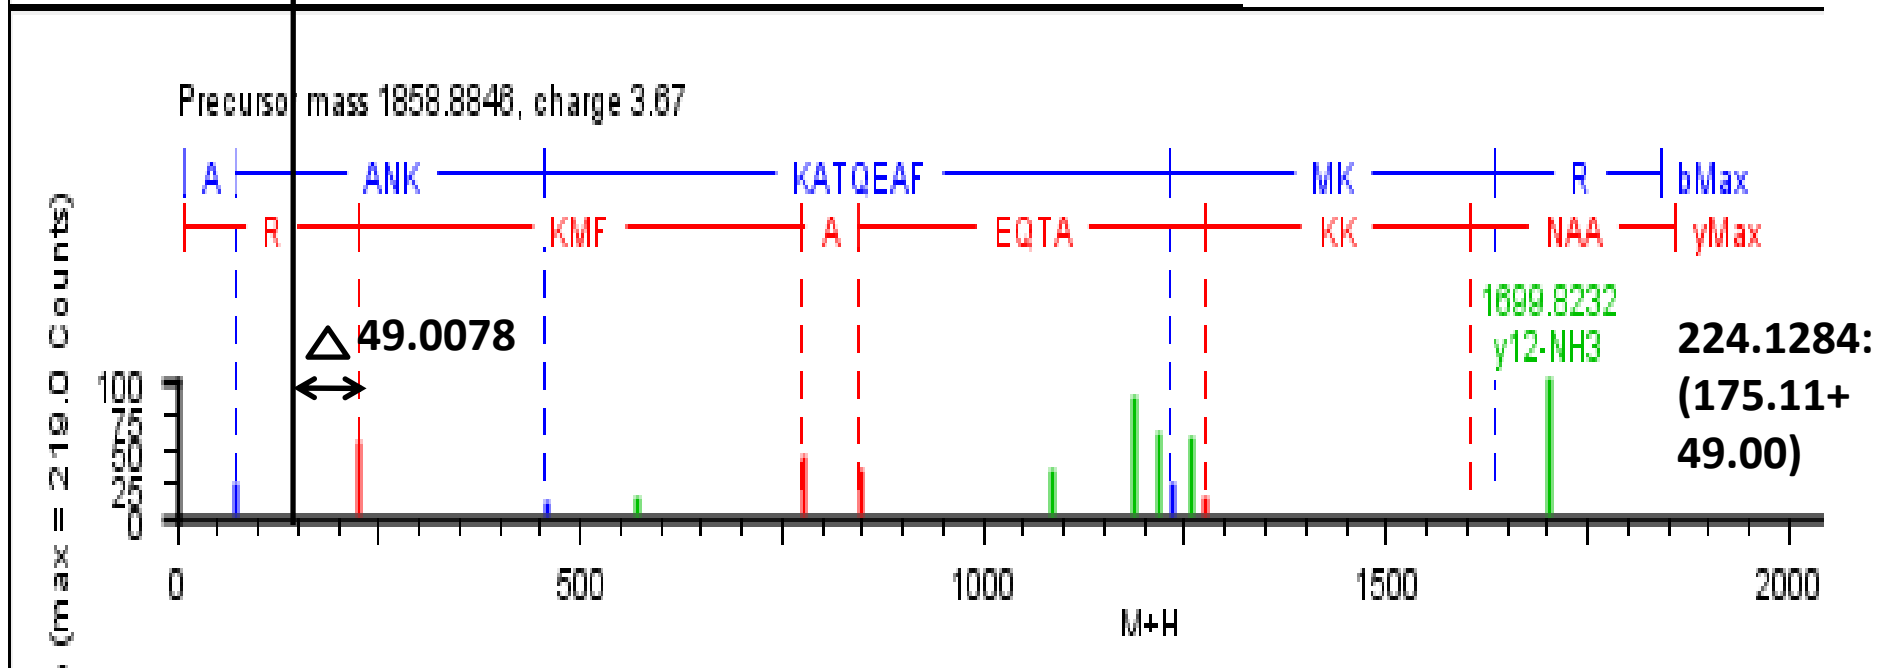

318-331

(K)AANKKATQEAFMKR(MOLD)(A)

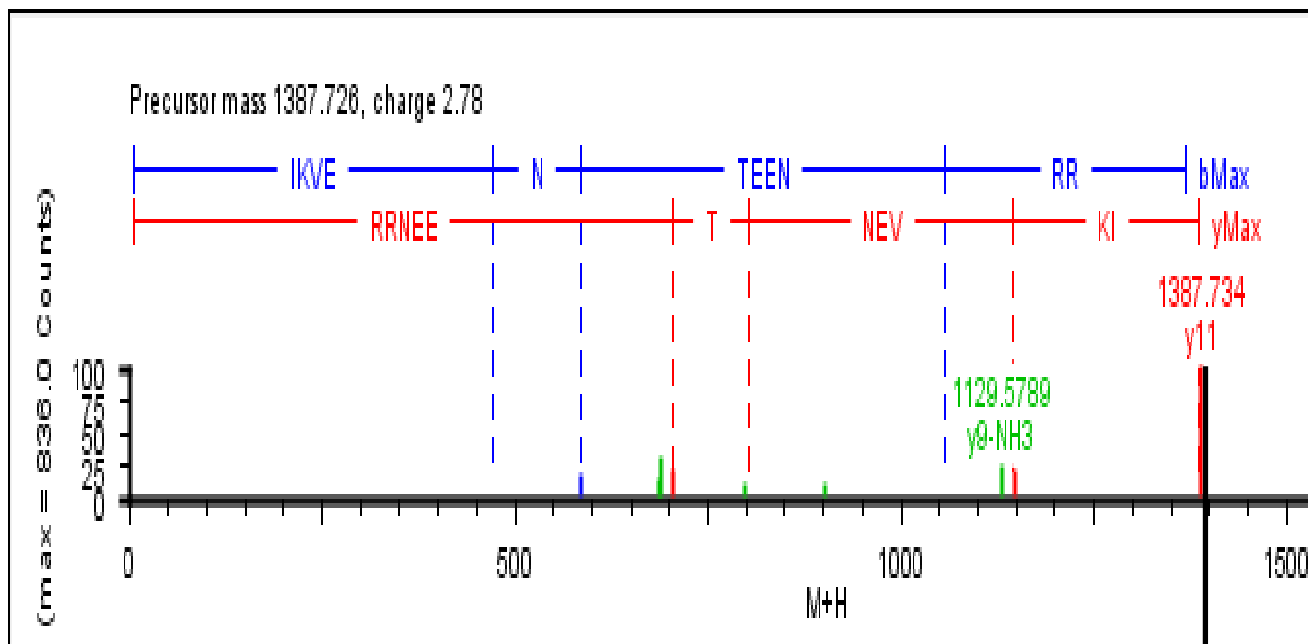

1387.734

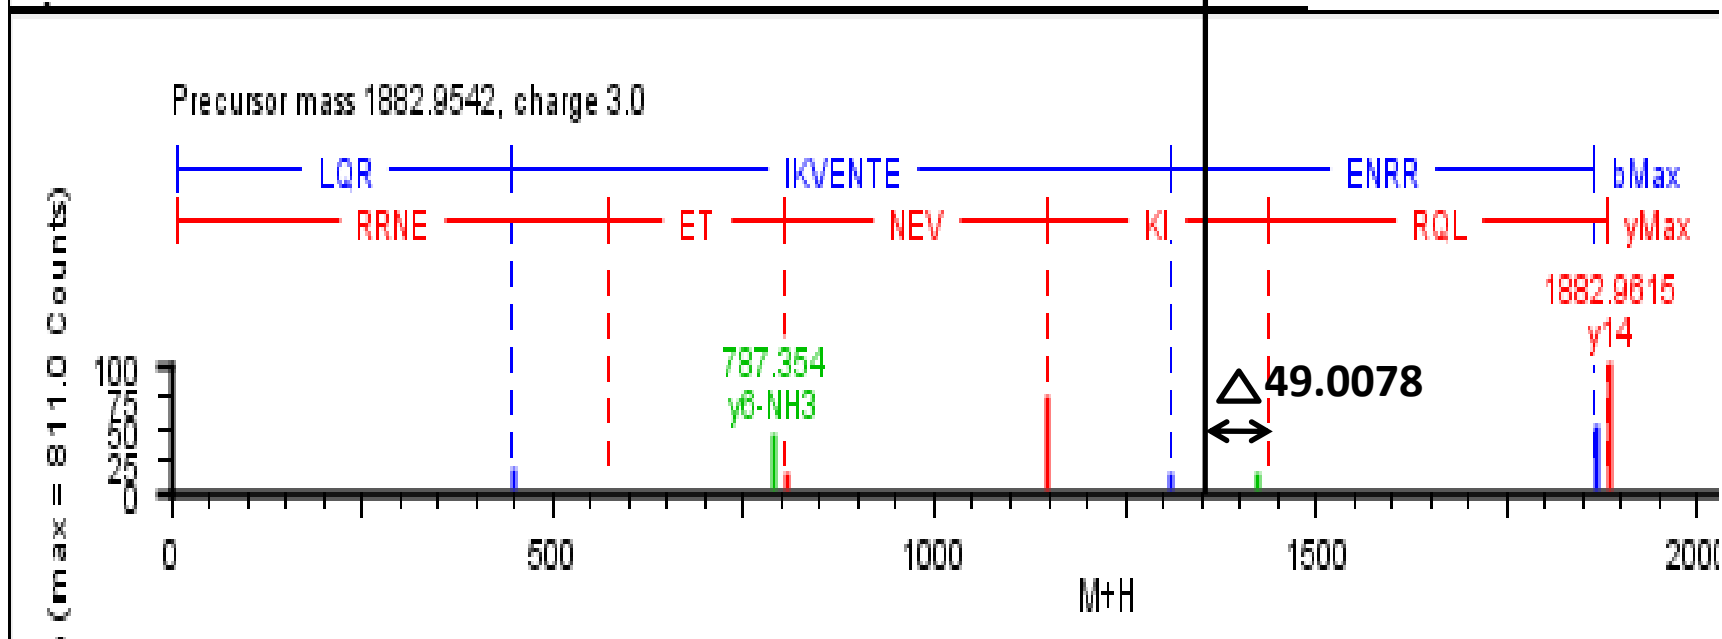

1436.6107  
(1387.734-  
49.00)

44-57

(R)LQRIK(MOLD)VENTEENRR(Q)

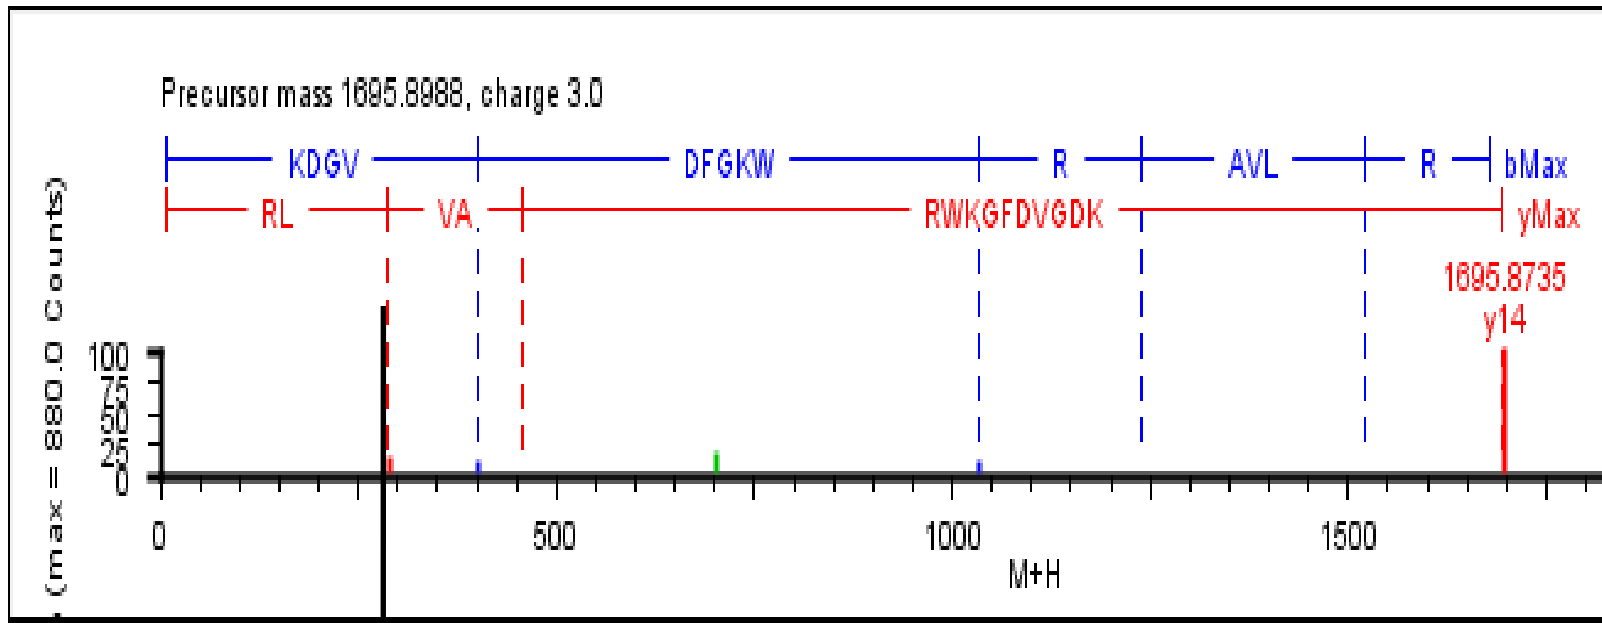

288.2013

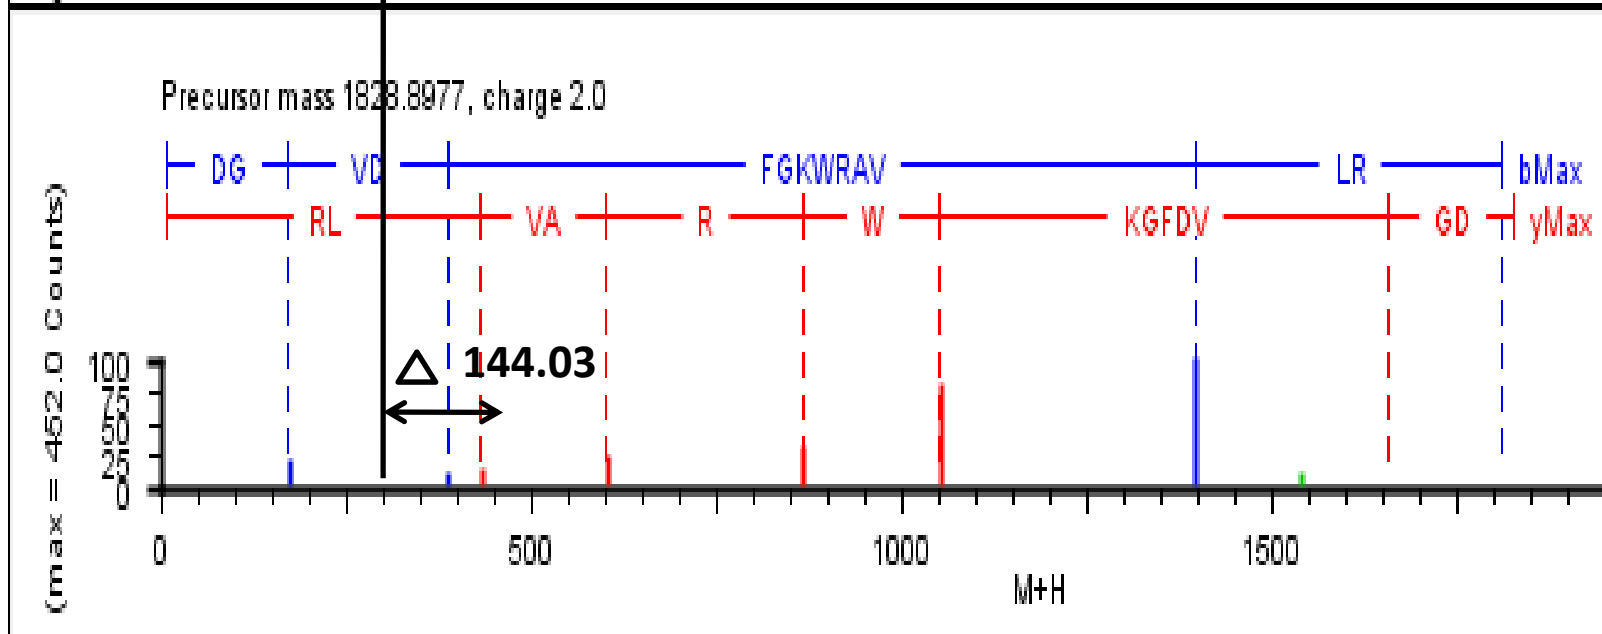

432.2314:  
(288.20+  
144.03)

141-153

(K)DGVD**FGKWR**AVLR(I)miA(I)

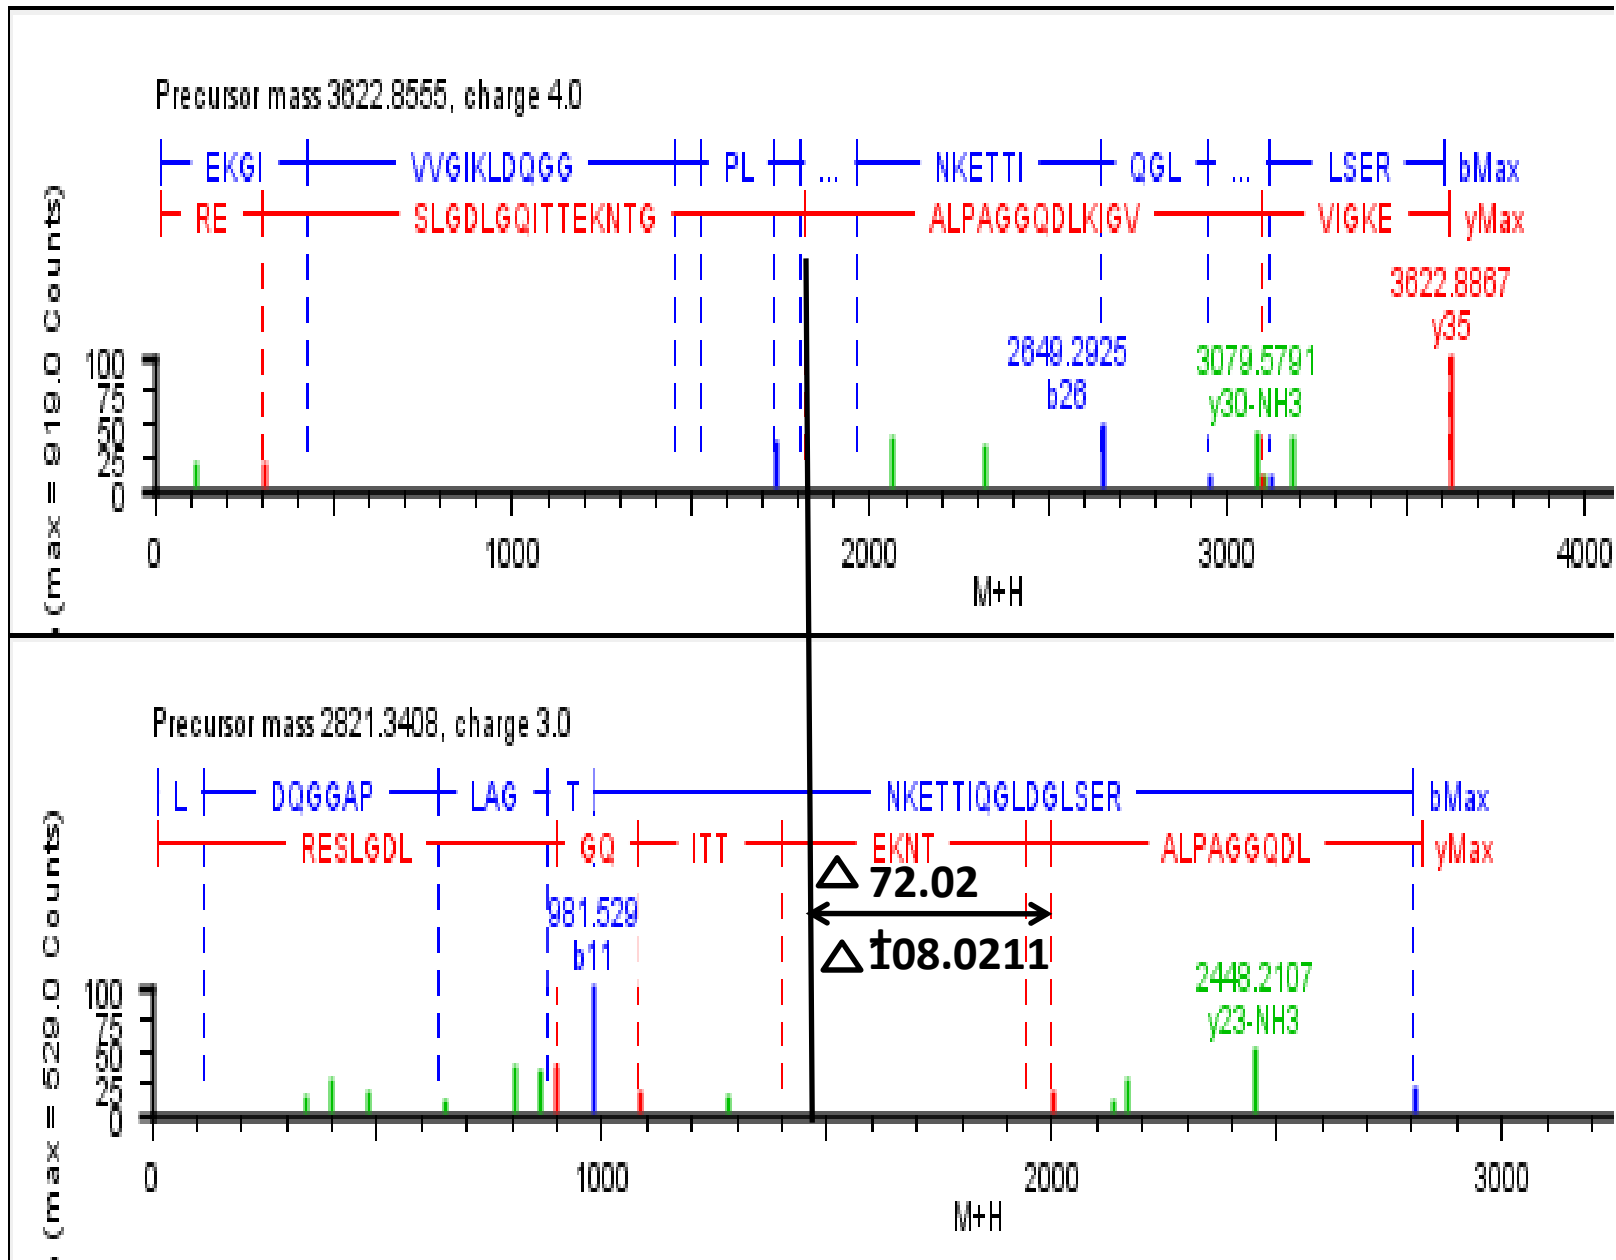

1818.9491

1999.0198:  
(1818.94+  
72.02+ 108.02)

109-134

(K)LDQGGAPLAGTNK(CEL)ETTIQGLDGLSER(Pyr)(C)

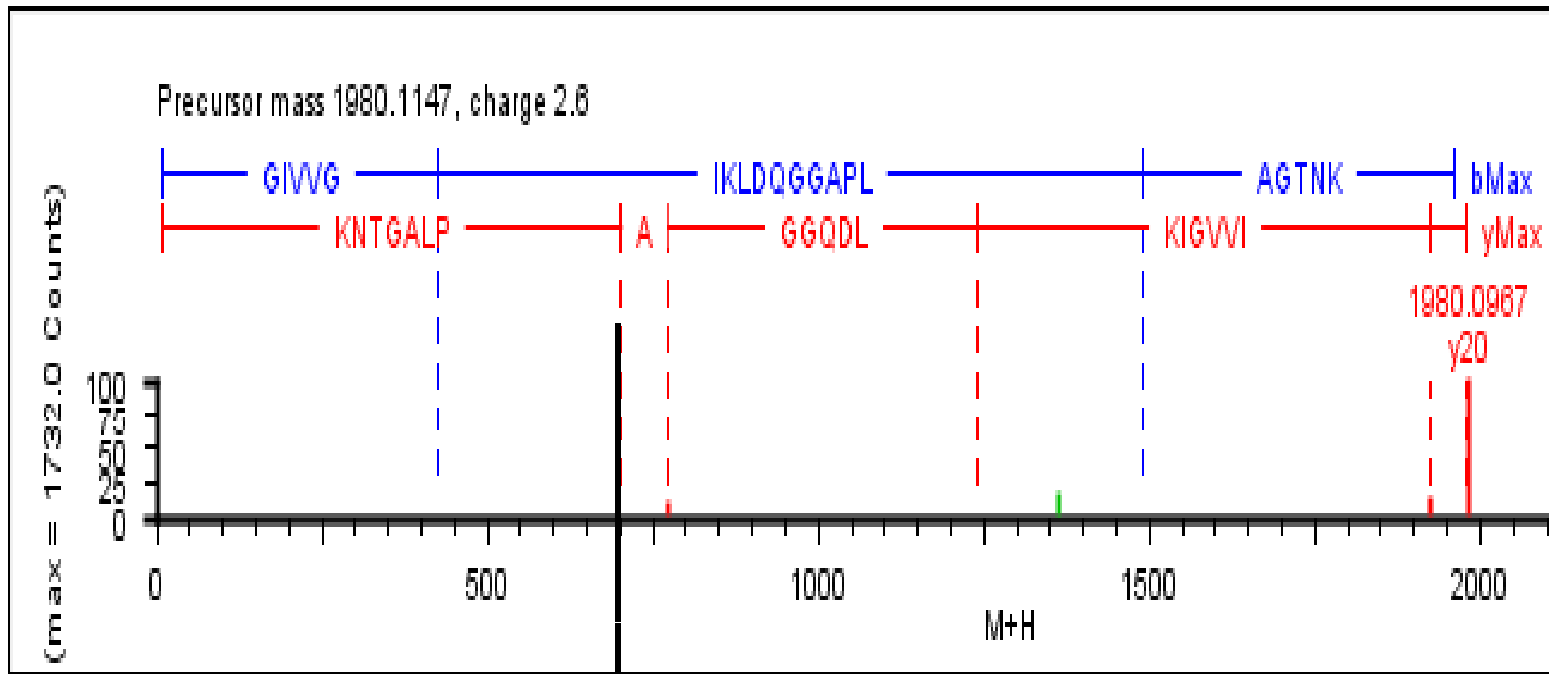

700.3675

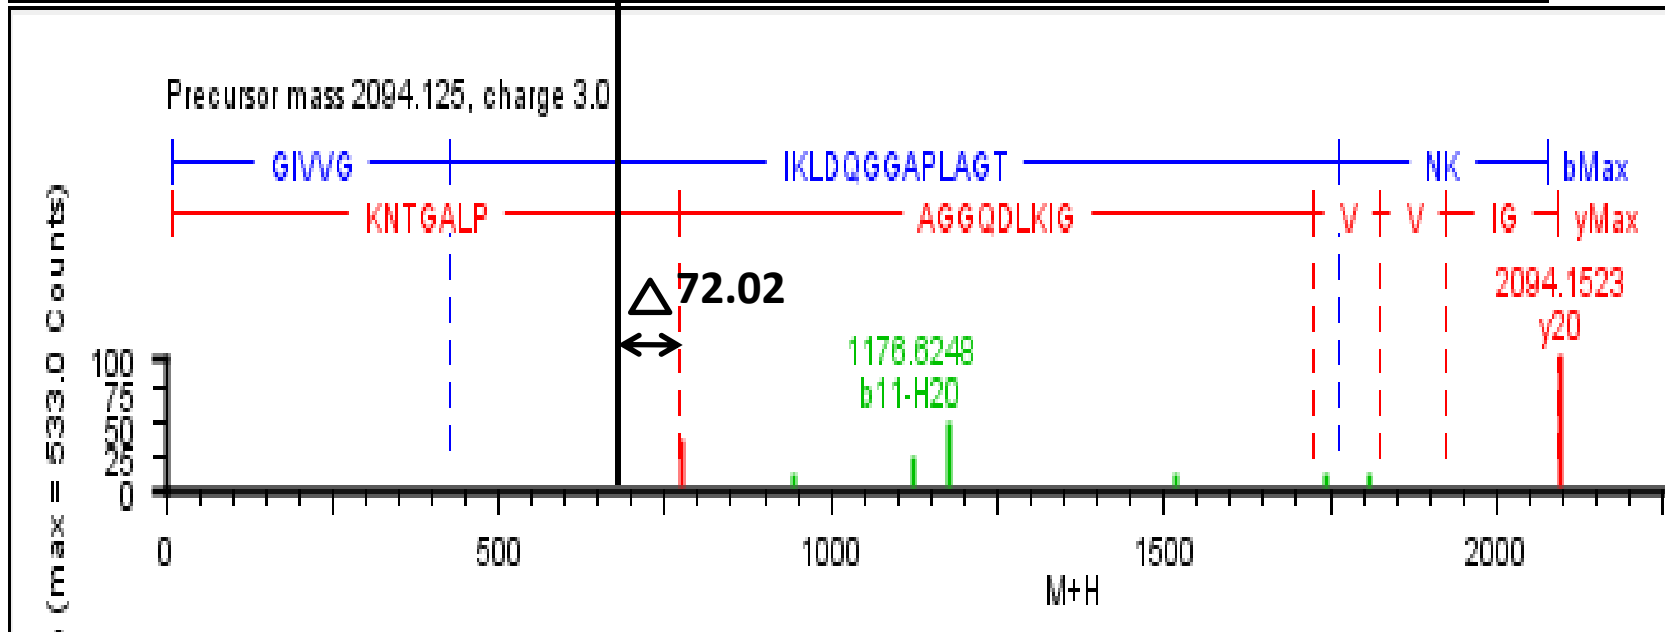

772.462:  
(700.36+  
72.02)

102-121

(K)GIVVGIKLDQGGAPLAGTNK(CEL)(E)

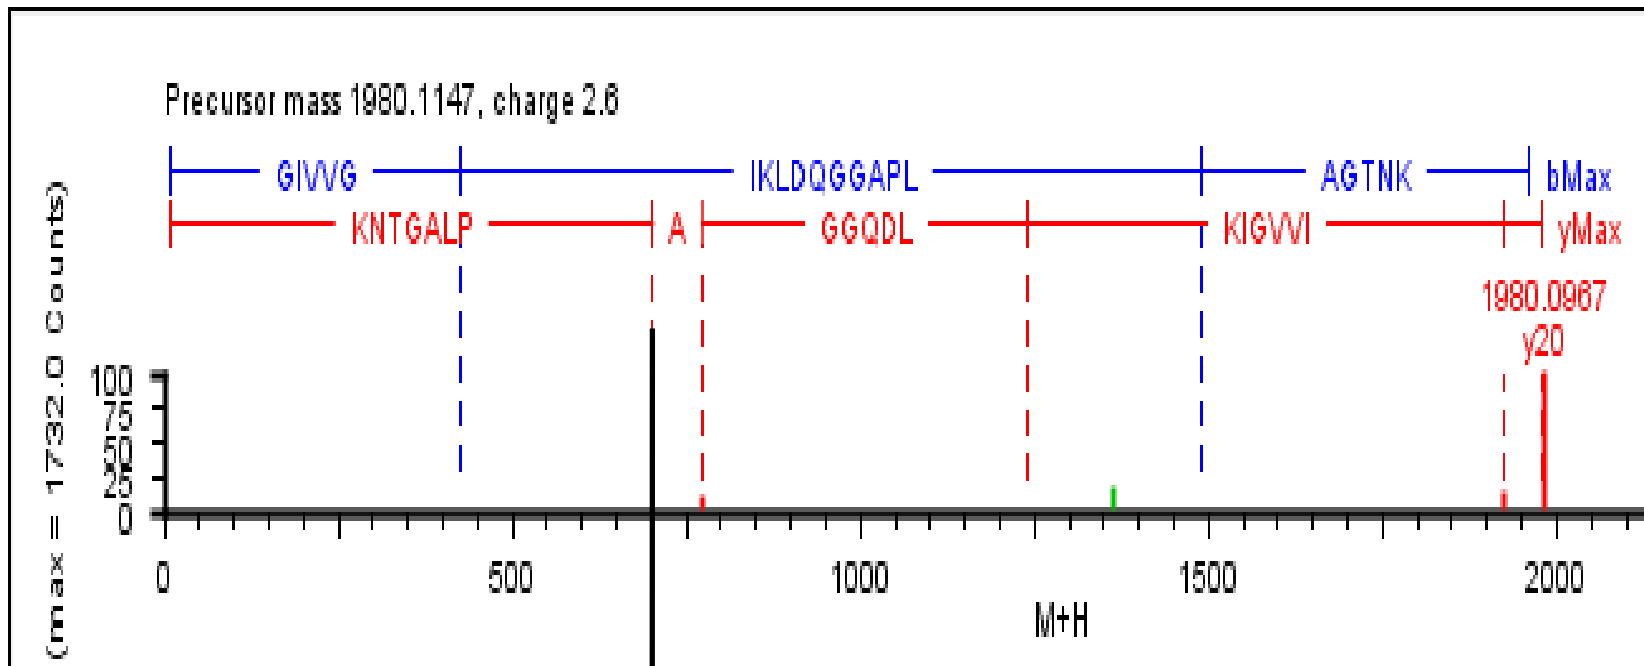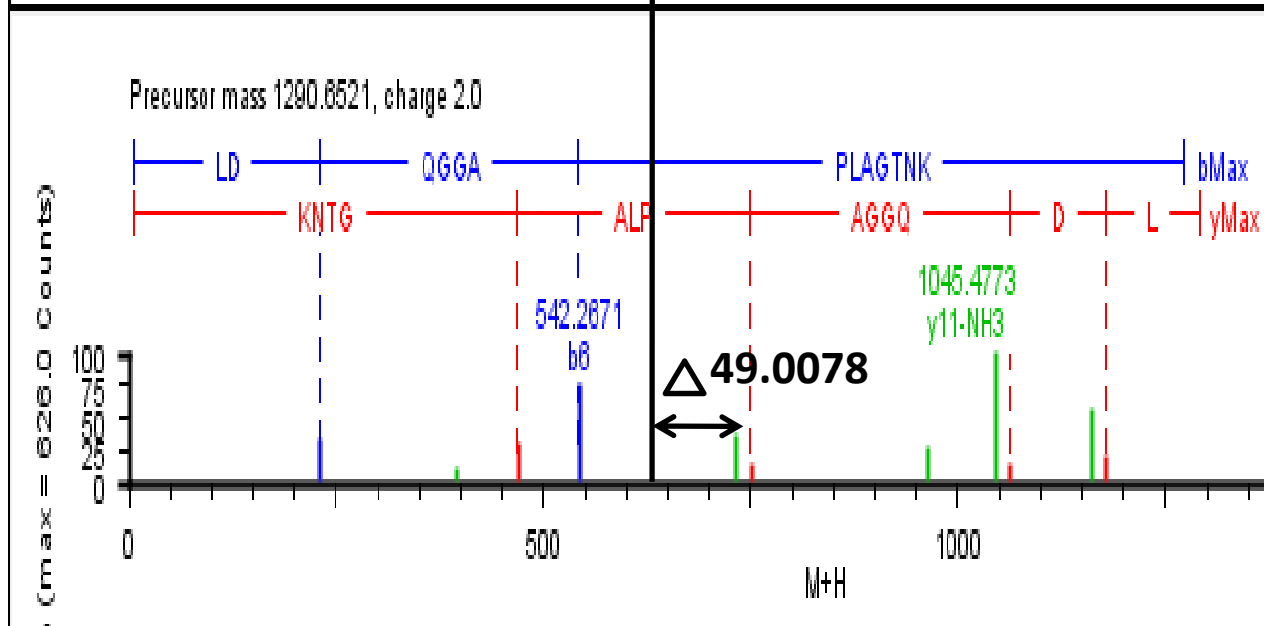

109-121

(K)LDQGGAPLAGTNK(MOLD)(E)



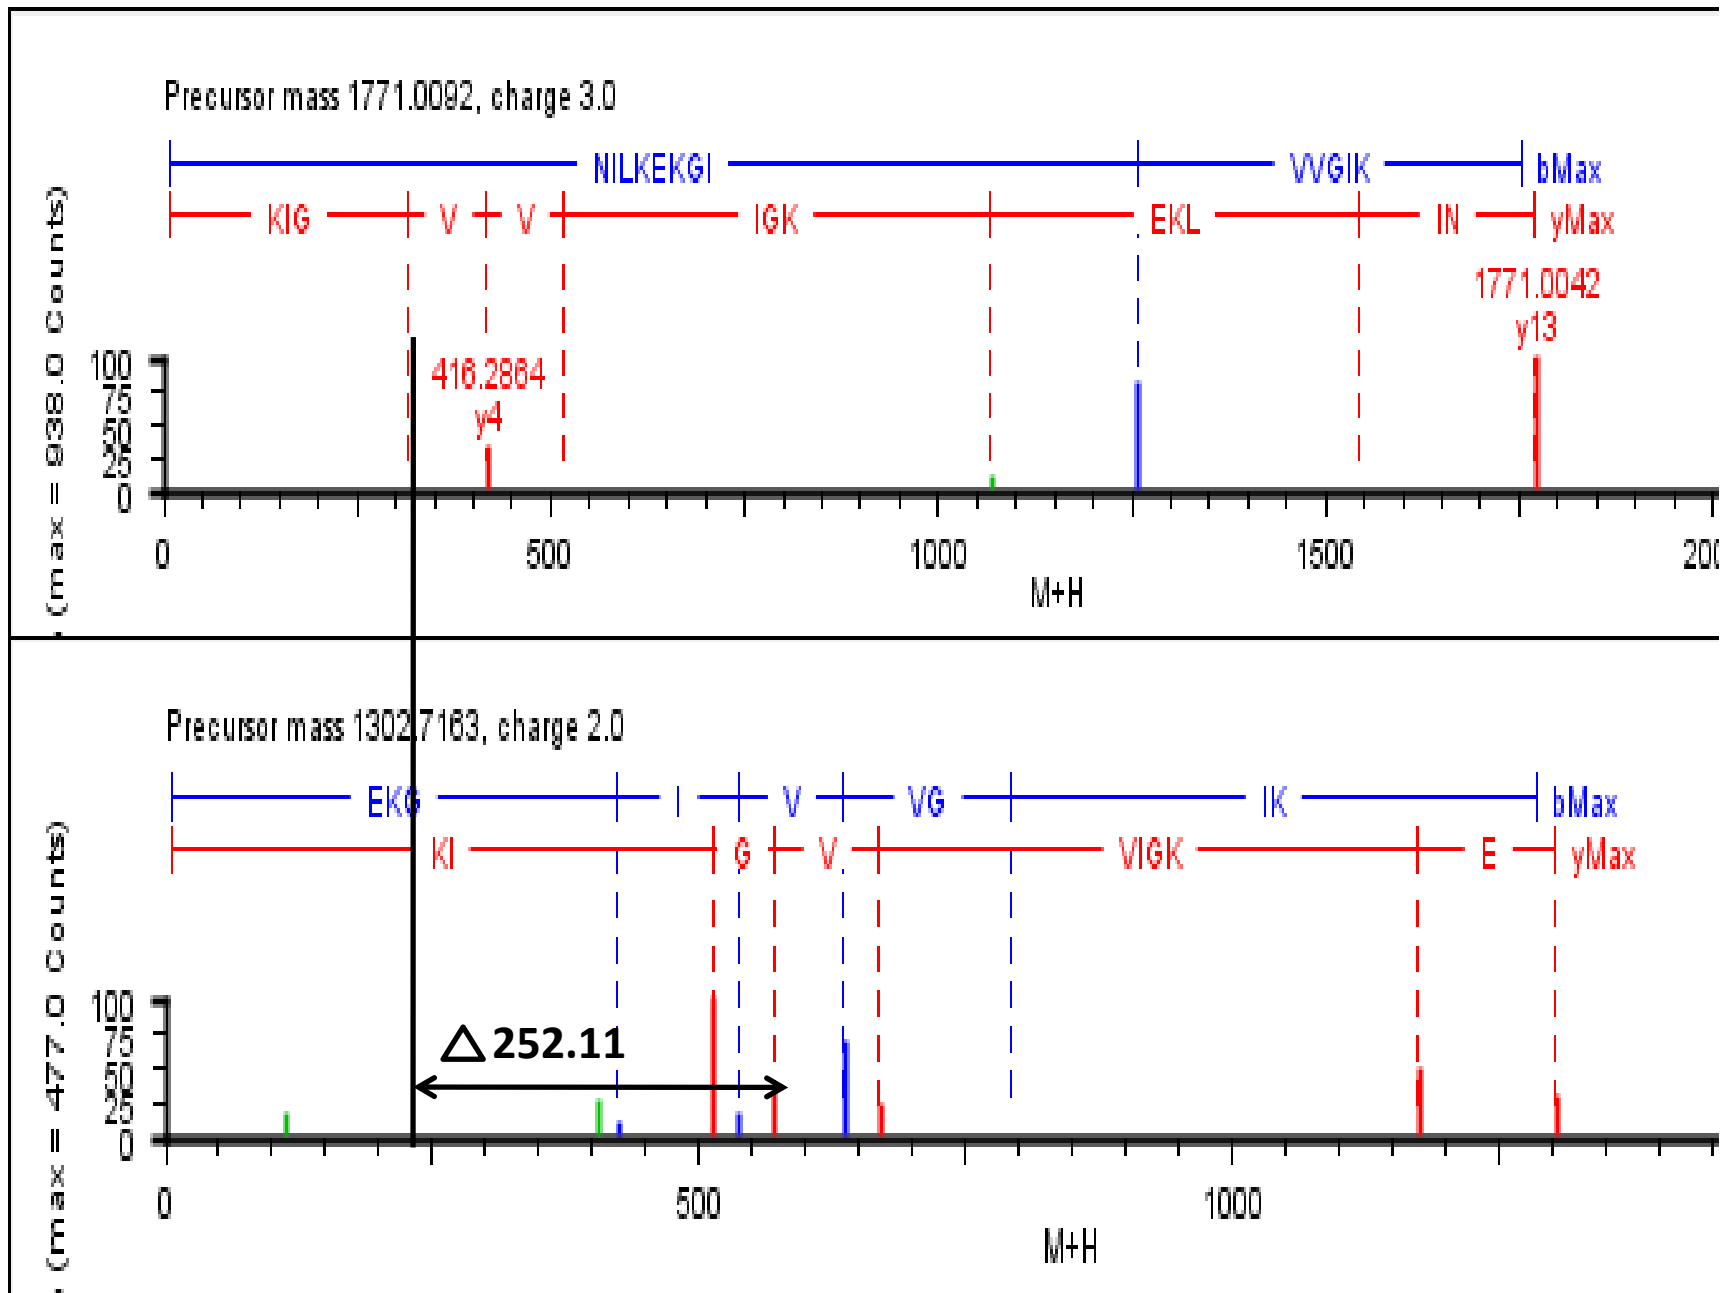

317.202

569.2986:  
(317.201+  
252.11)

100-108

(K)EKGIVVGIK(Crossline)(L)

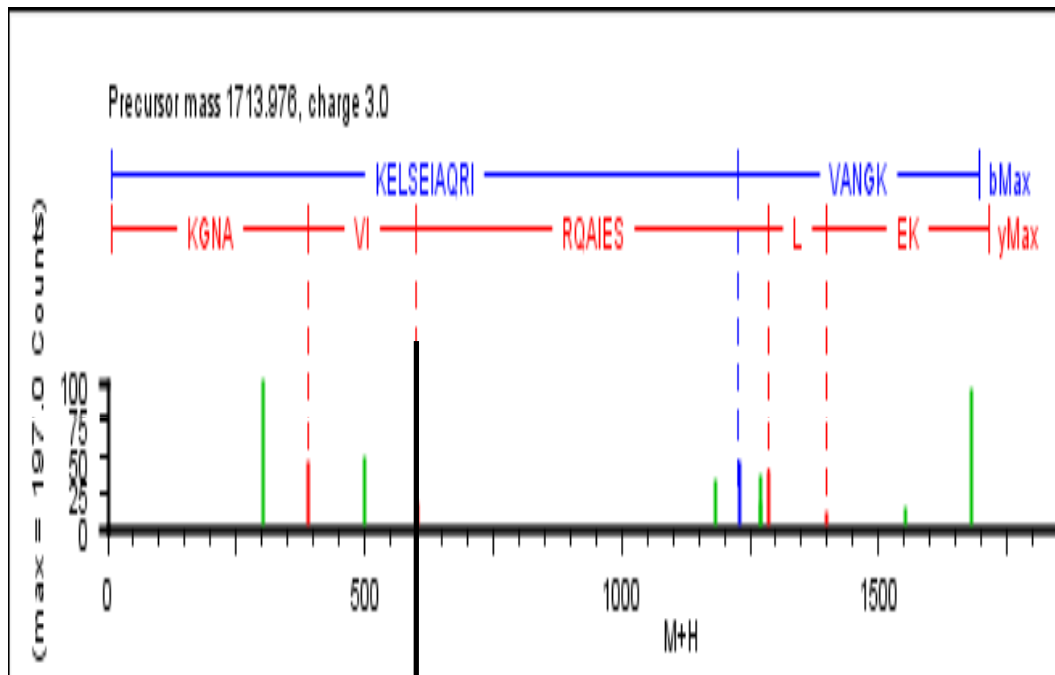

601.3851

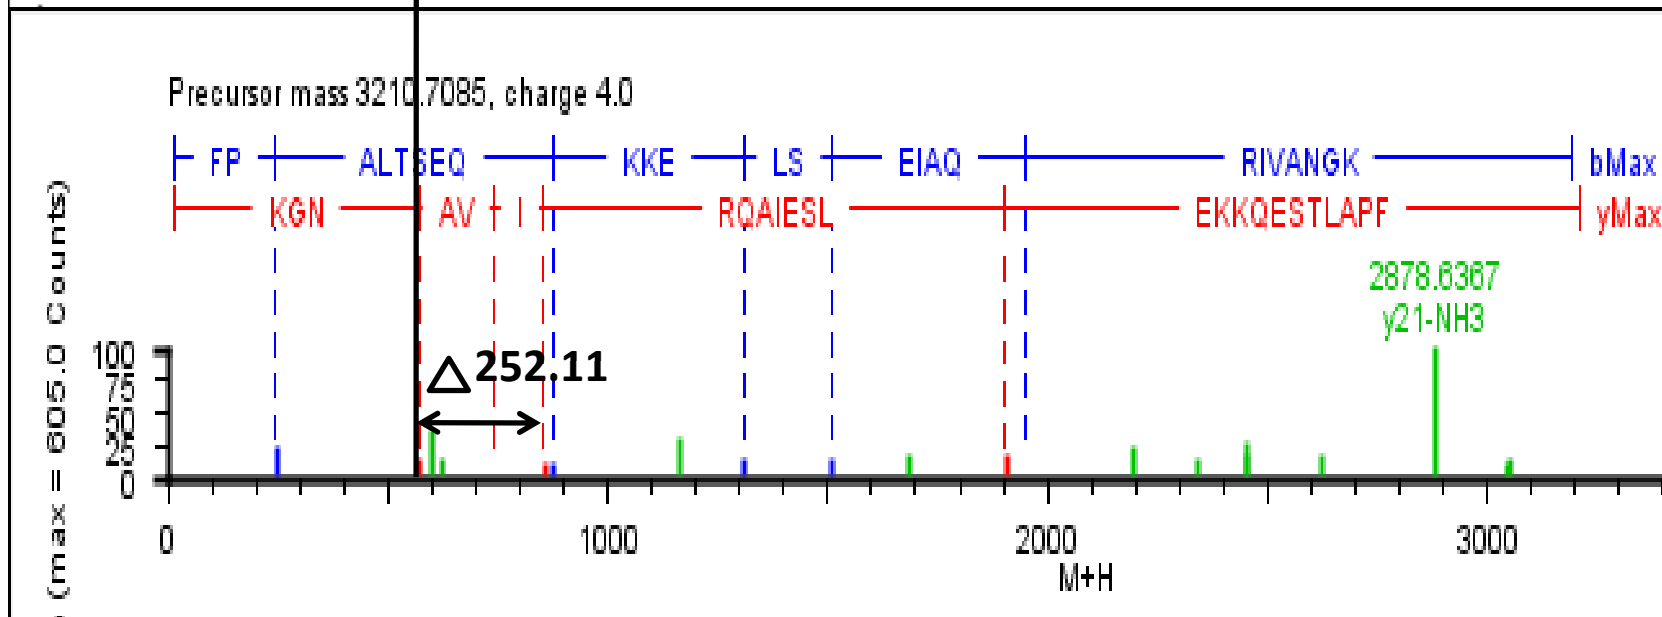

853.466:  
(601.38+  
252.1)

5-28

(R)FPALTSEQK**K**EELSEIAQRIVANG**K**(Crossline)(G)

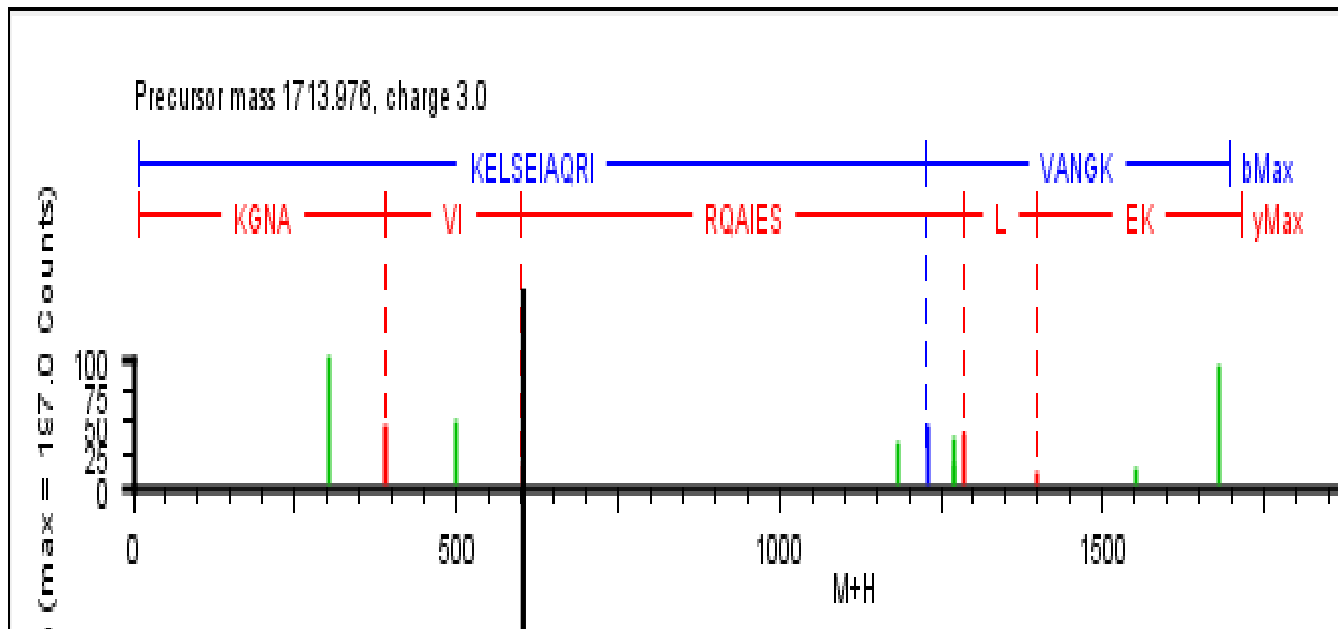

601.3851

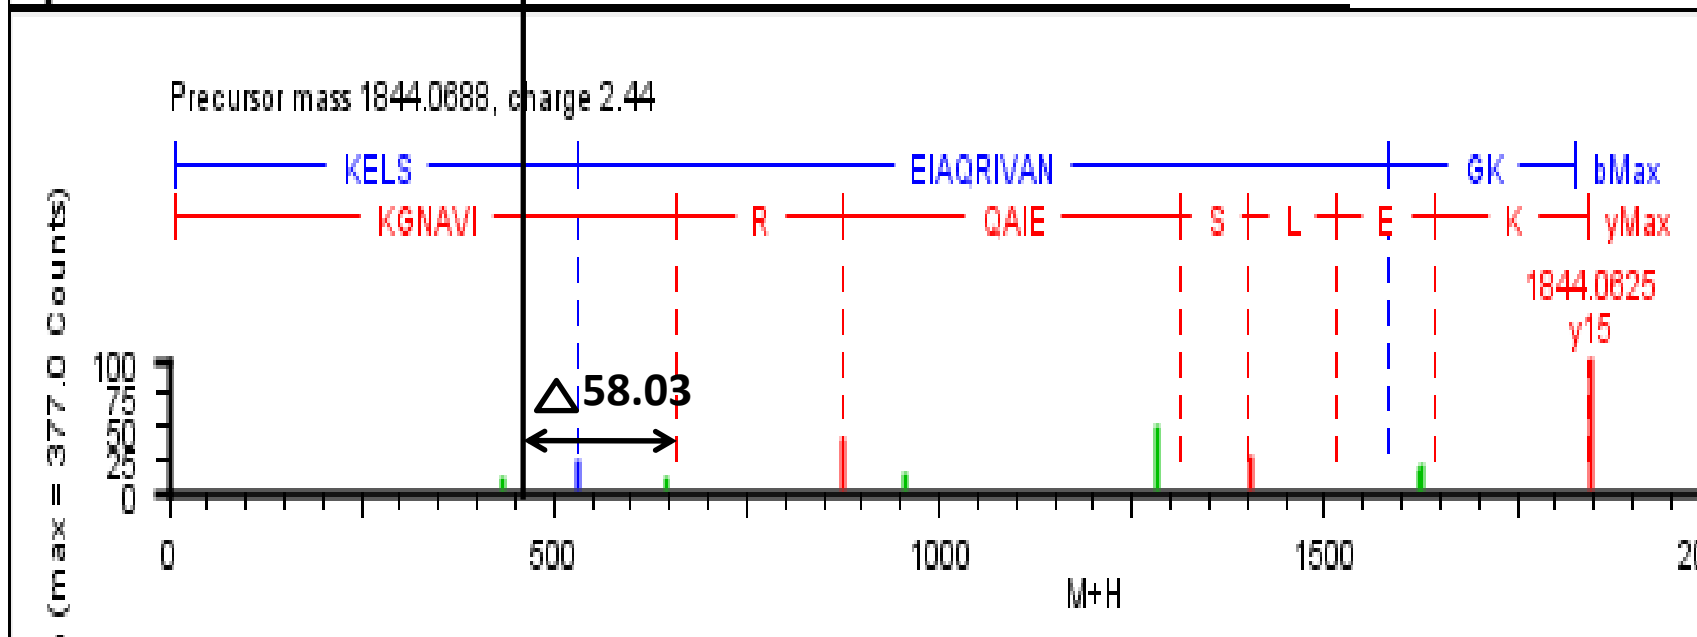

659.4387:  
(601.38+  
58.03)

14-28

(K)KELSEIAQRIVANGK(Pento)(G)

ADH

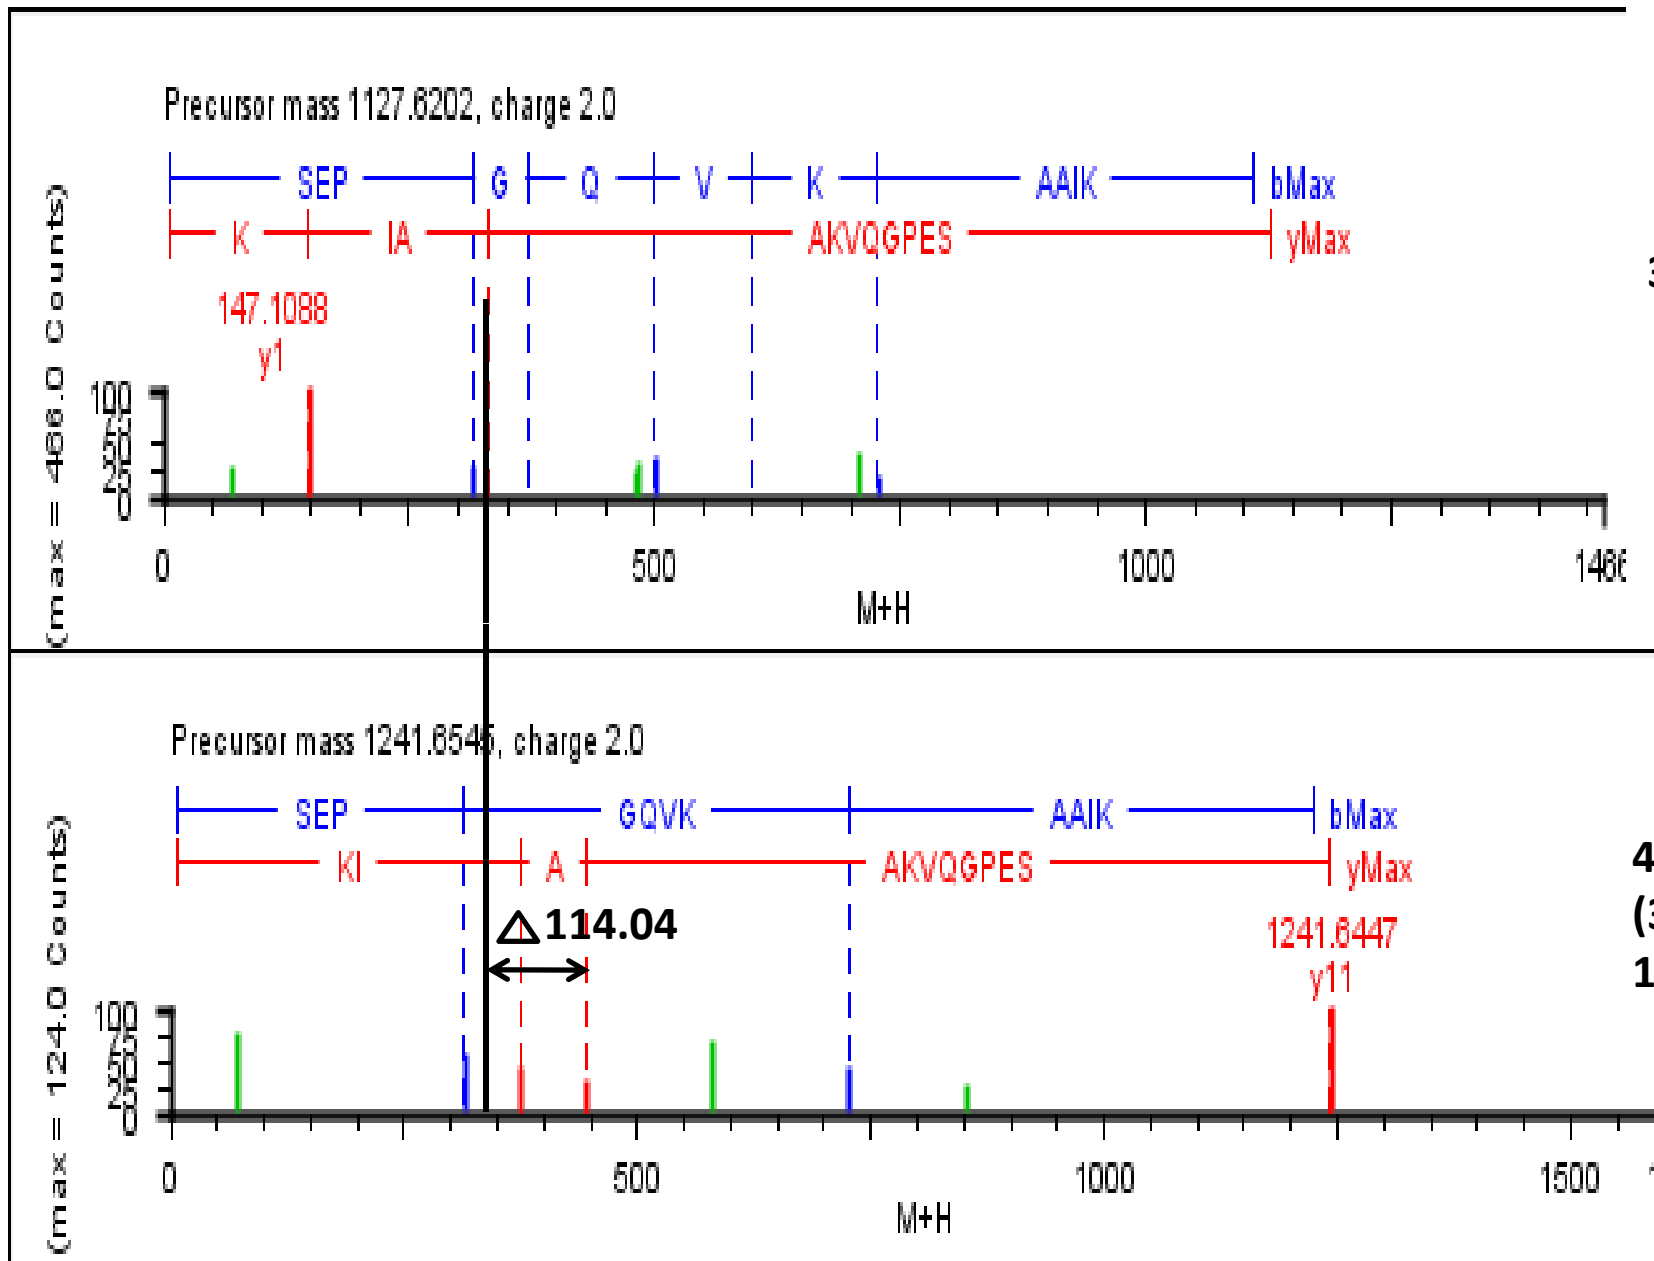

331.2106

445.2547:  
(331.21+  
114.04)

24-34

(K)SEPGQVKA(AIK)(Y)

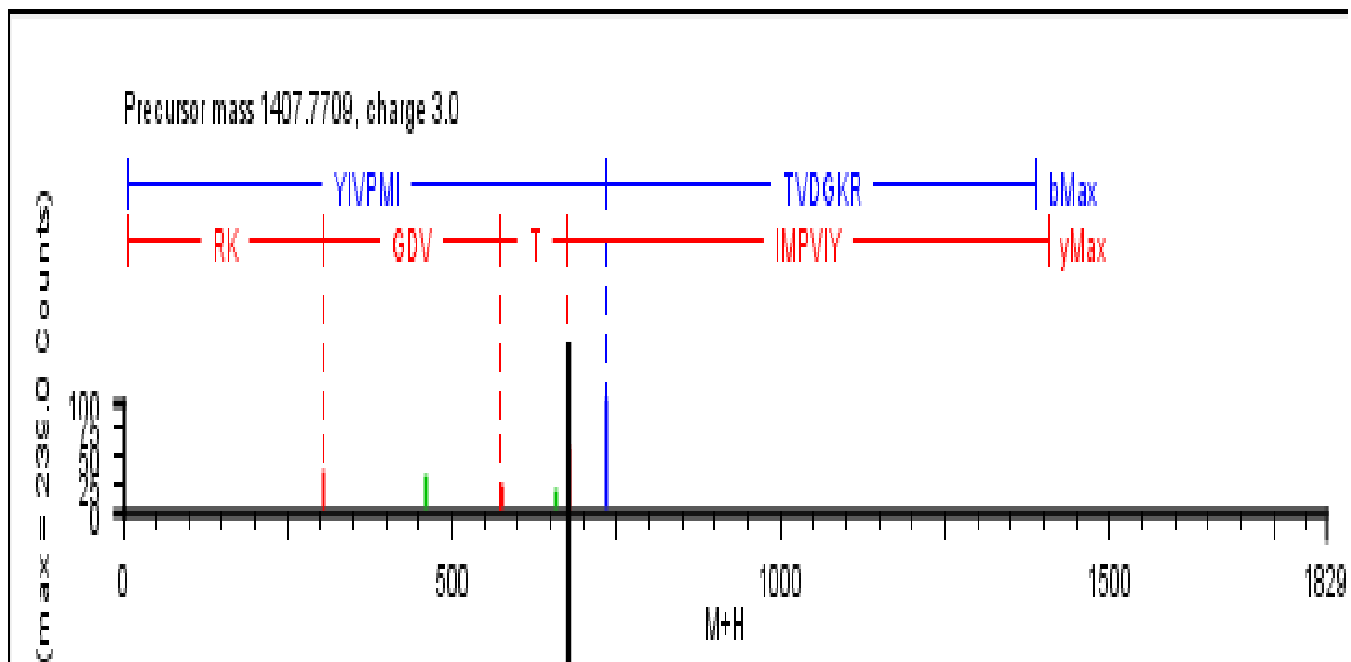

675.3715

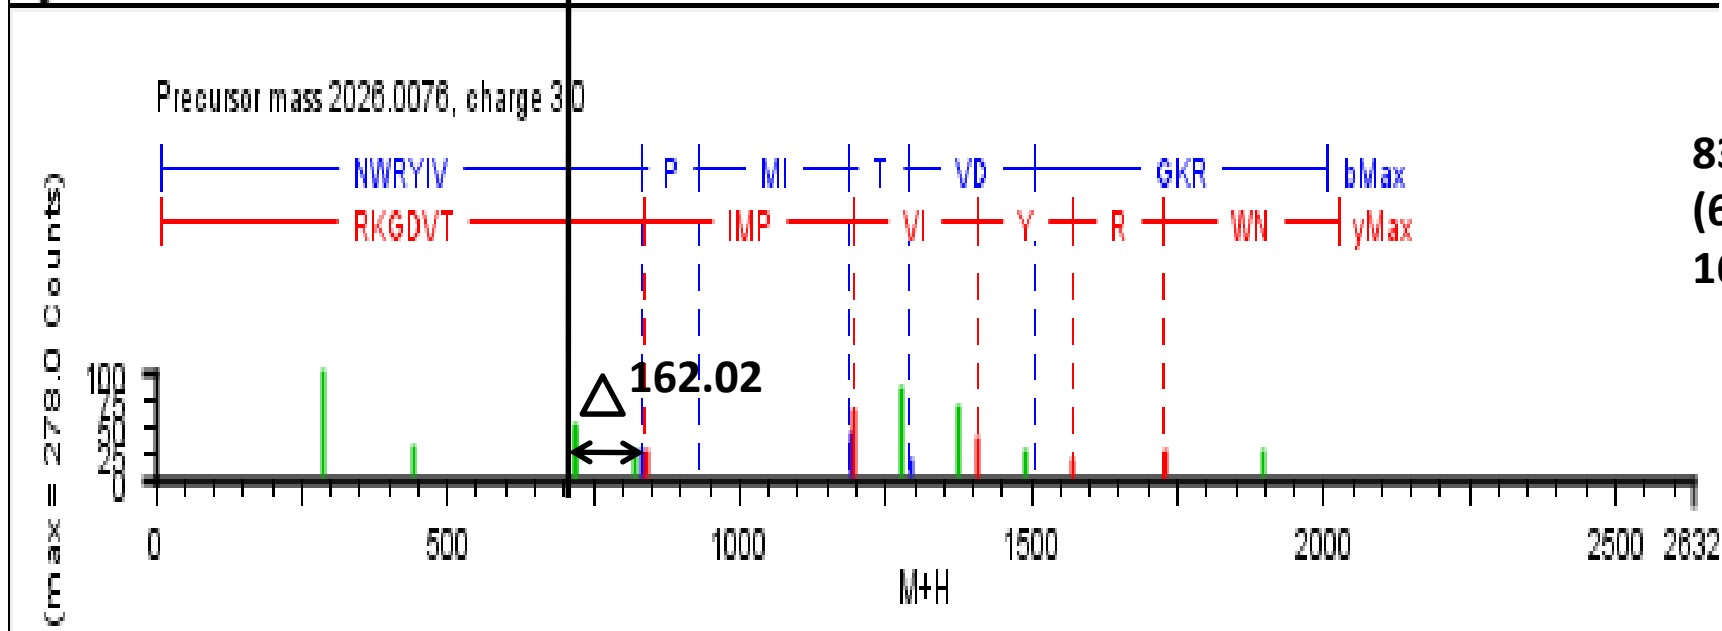

837.4258:  
(675.37+  
162.02)

295-309

(K)NWRIVPMITVDGKR(Gly)(V)

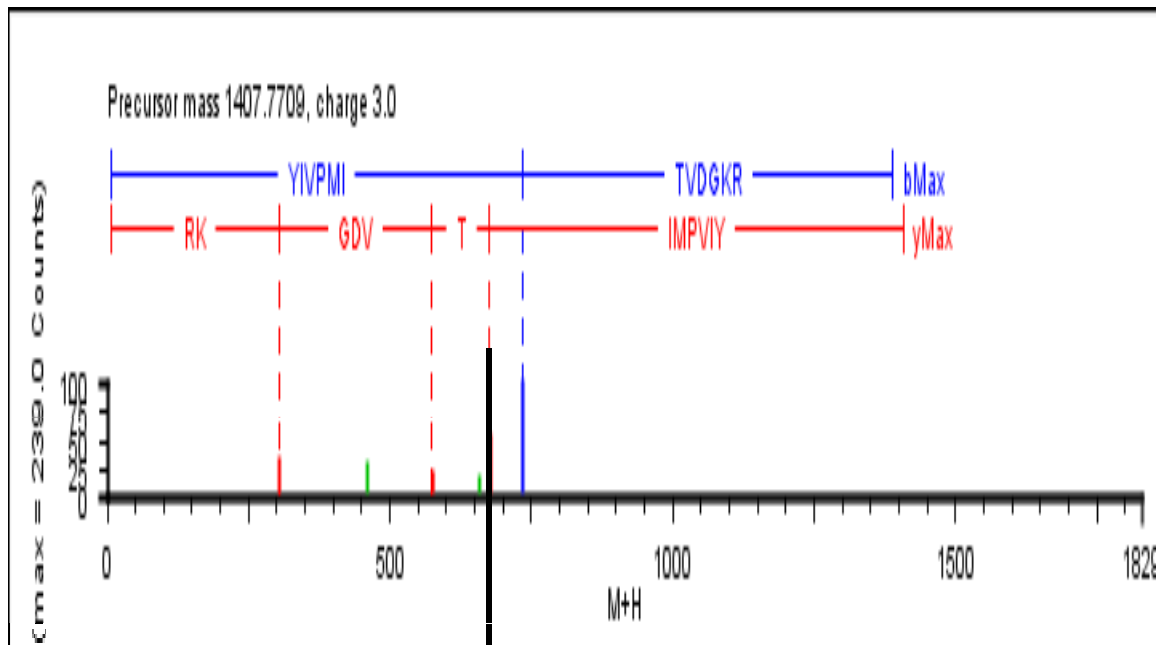

675.3715

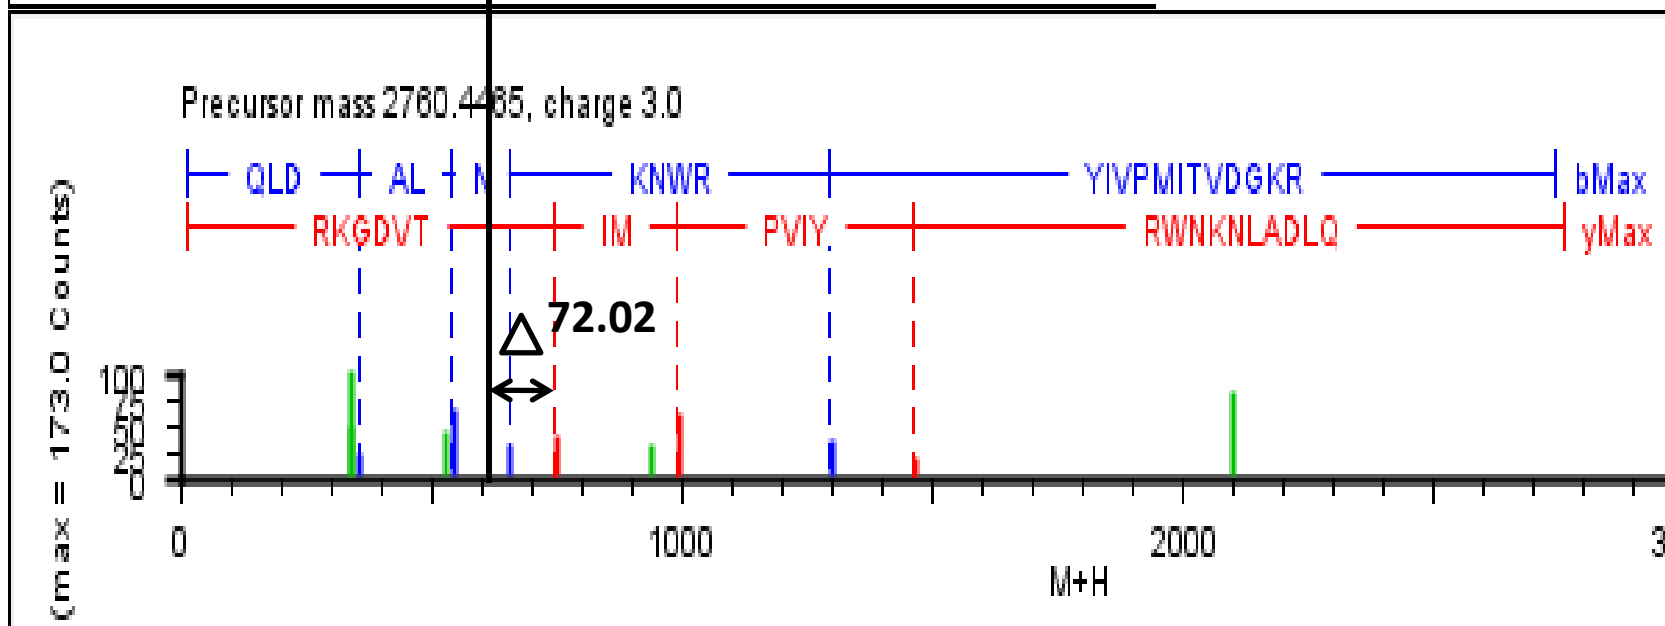

74.4246:  
(675.37+  
72.02)

288-309

(K)QLDALNKNWRYIVPMITVDGK(Cel)R(V)

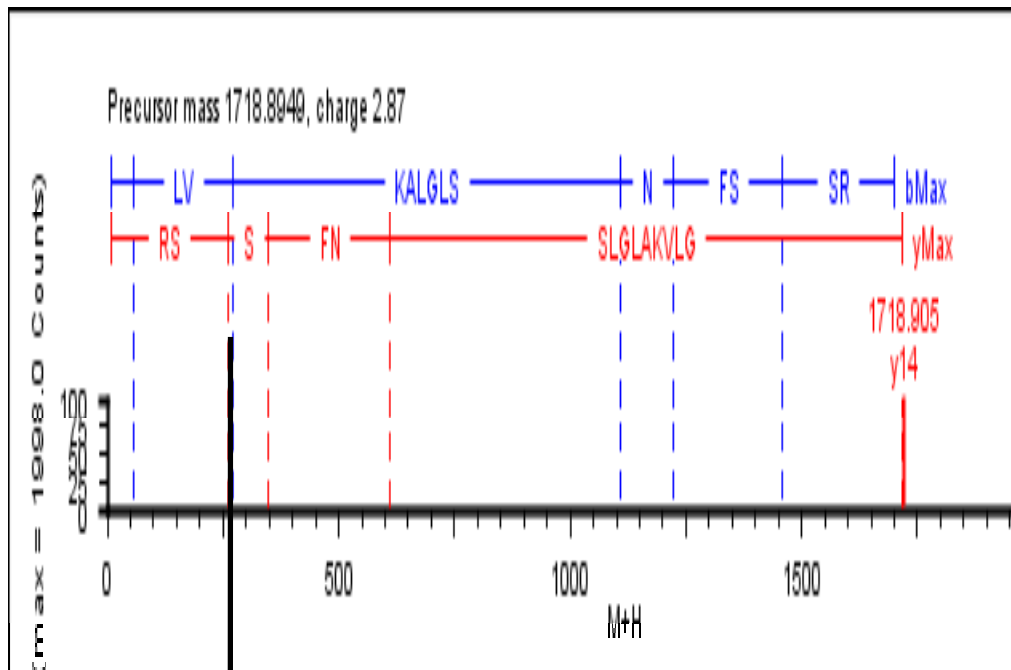

262.158

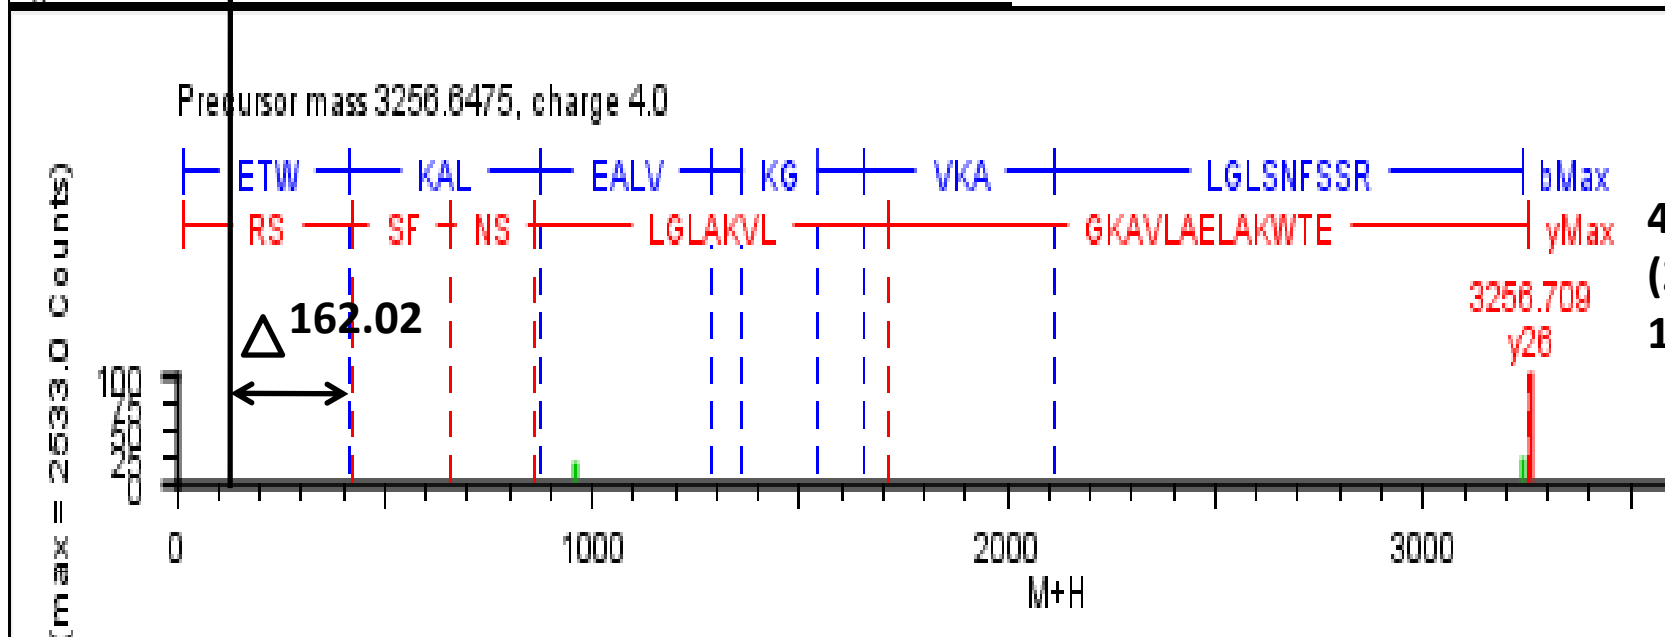

424.1726:  
 (262.15+  
 162.02)

142-167

(K)ETWKALEALVAKGLVKALGLSNFSSR(Gly)(Q)



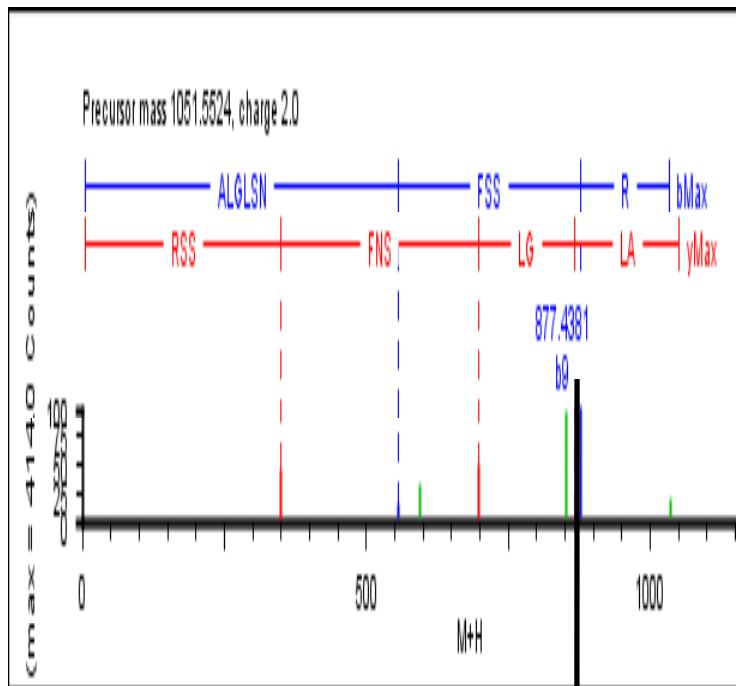

867.4374

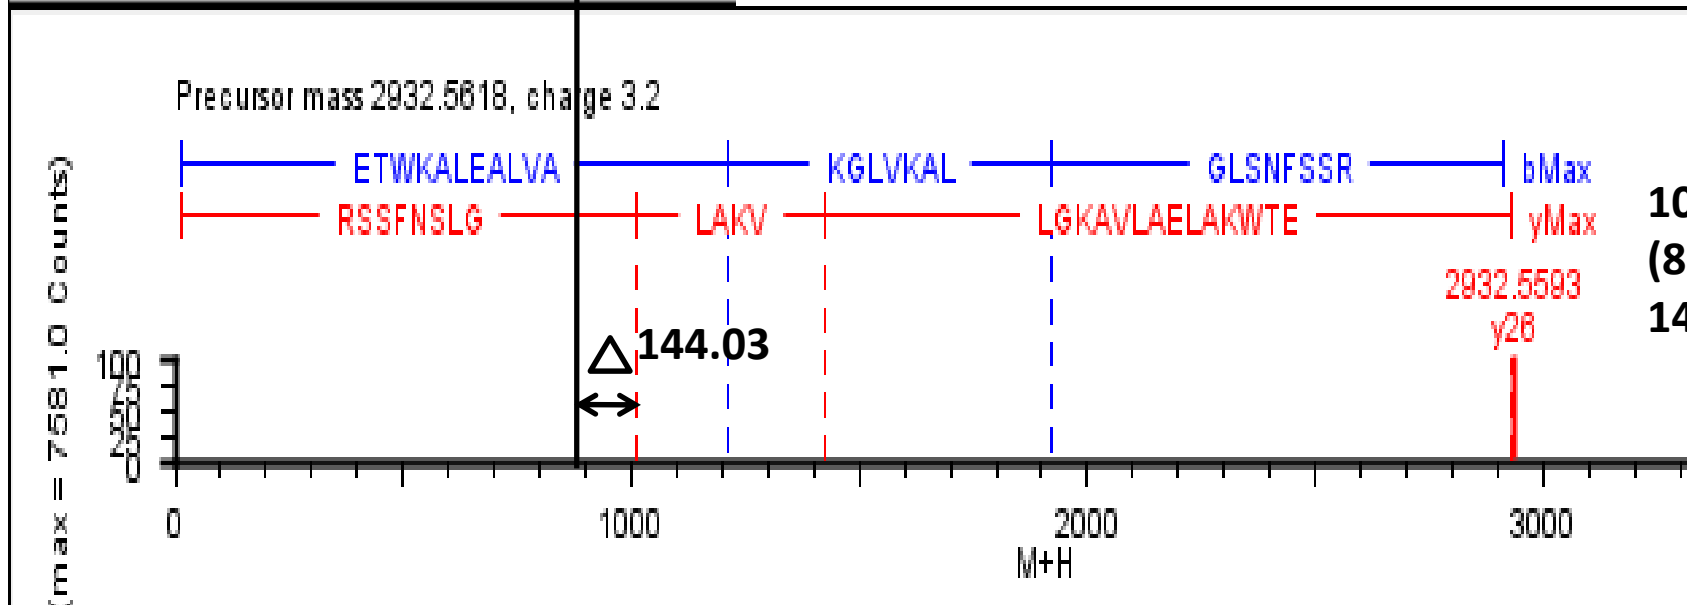

1011.5593:  
(867.43+  
144.03)

142-167

(K)ETWKALEALVAKGLVKALGLSNFSSR(ImiA)(Q)

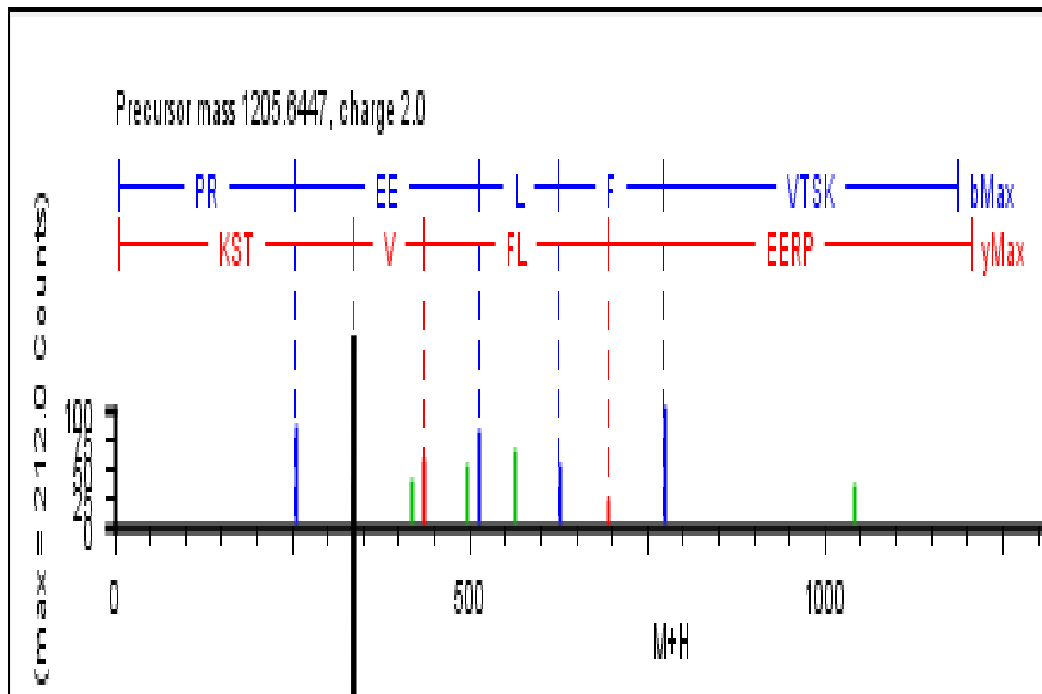

335.1957

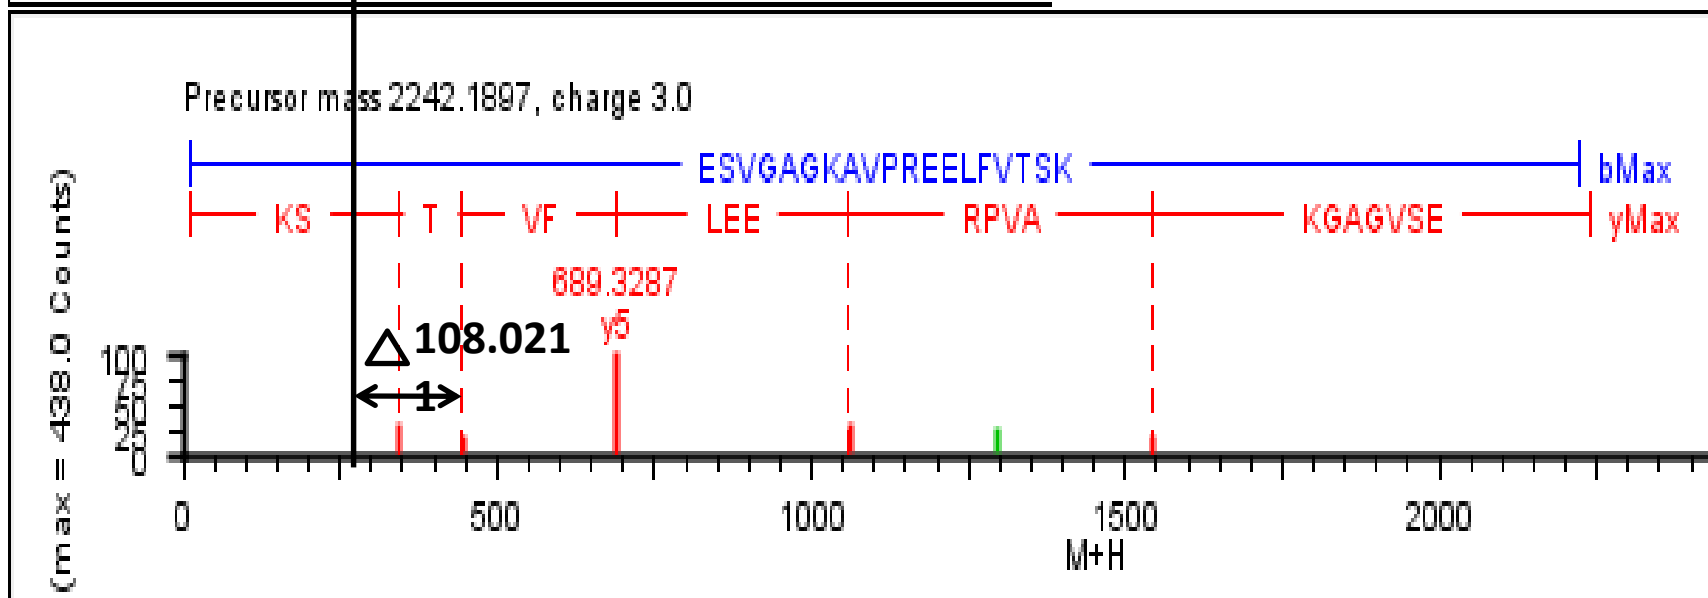

443.1832:  
(335.19+  
108.02)

62-80

(K)ESVGAGKAVPREELFVTSK(Pyr)(L)

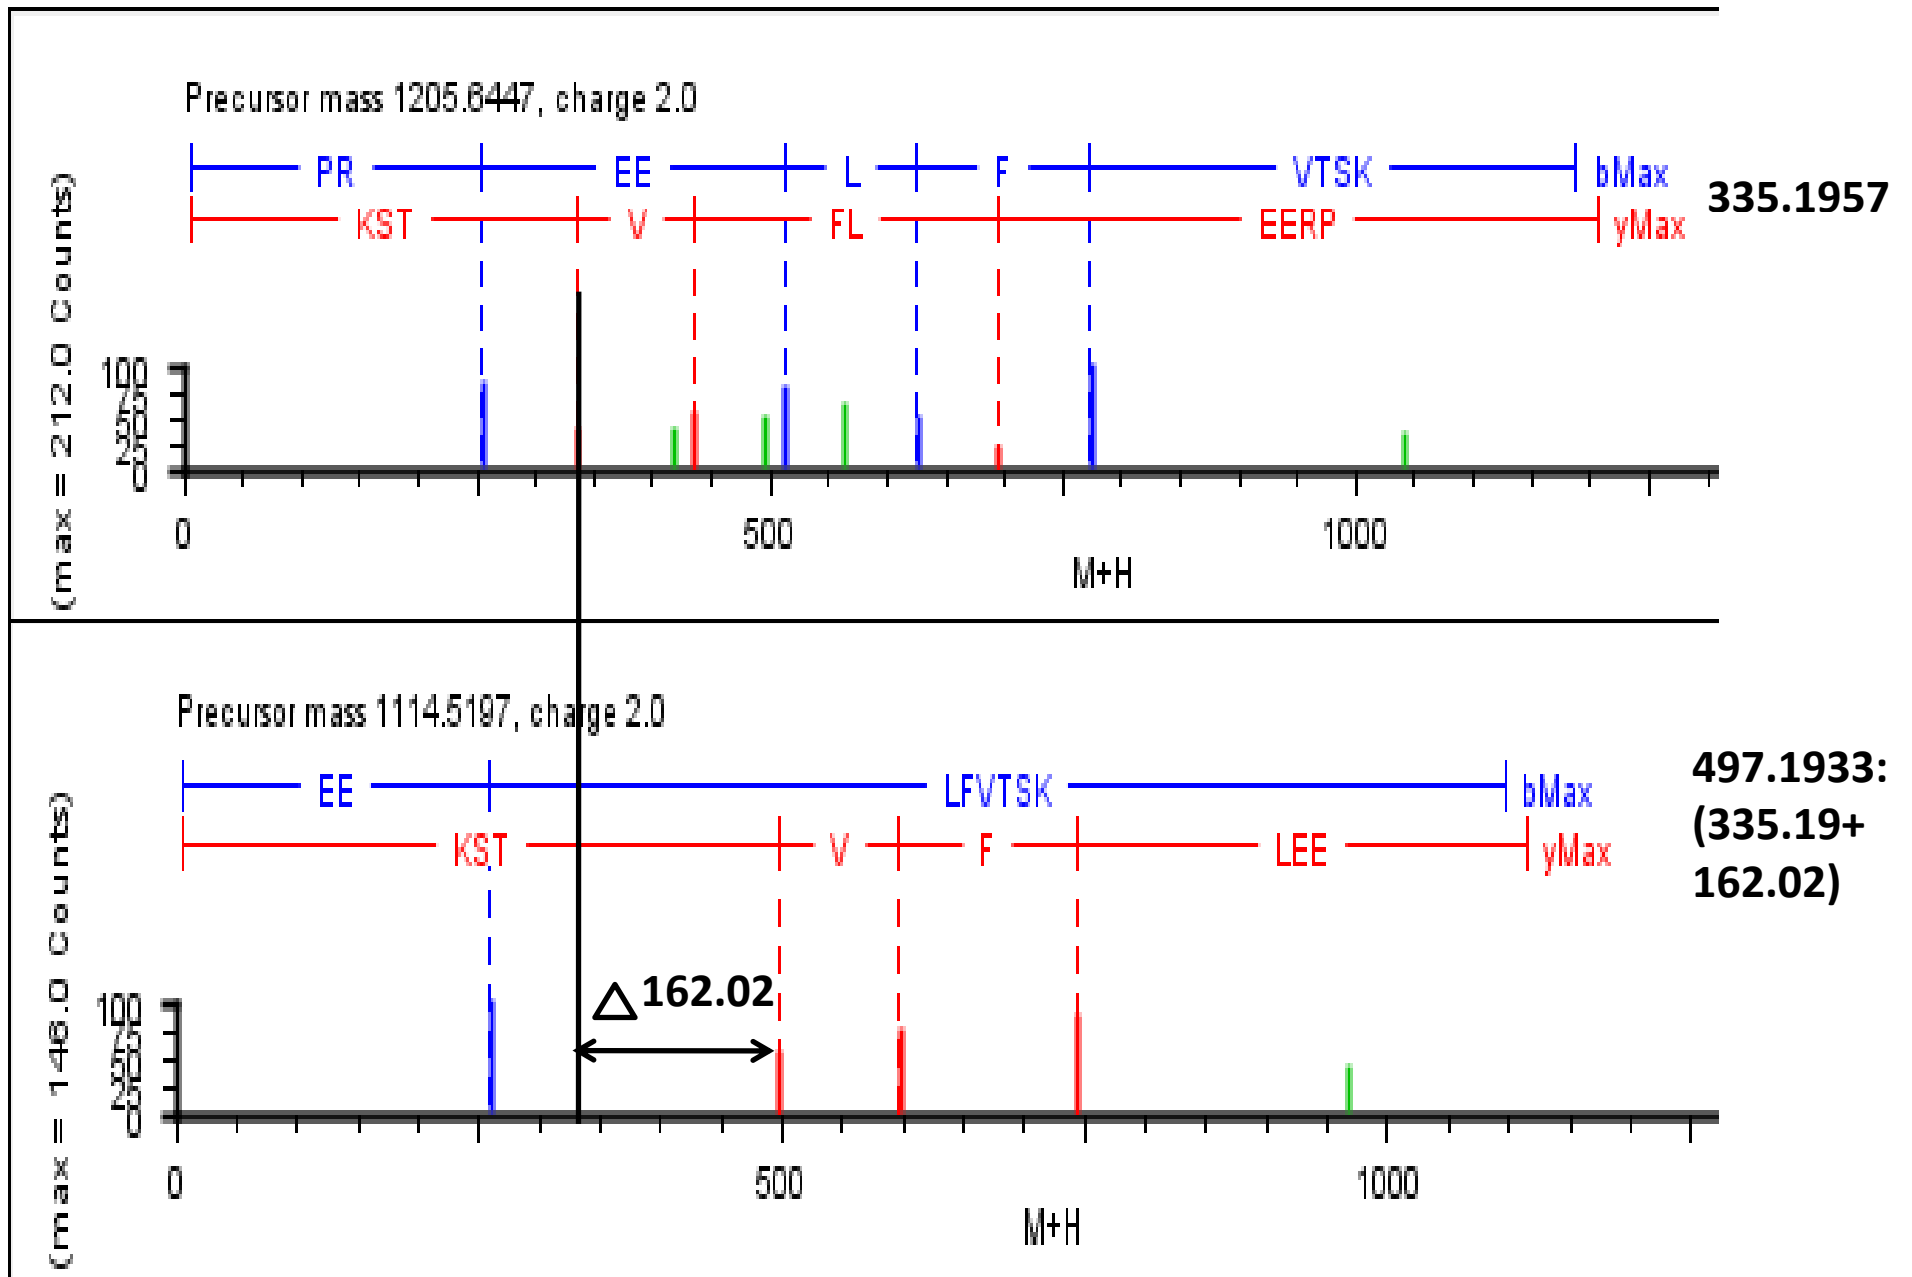

73-80

(R)EELFVTSK(Gly)(L)

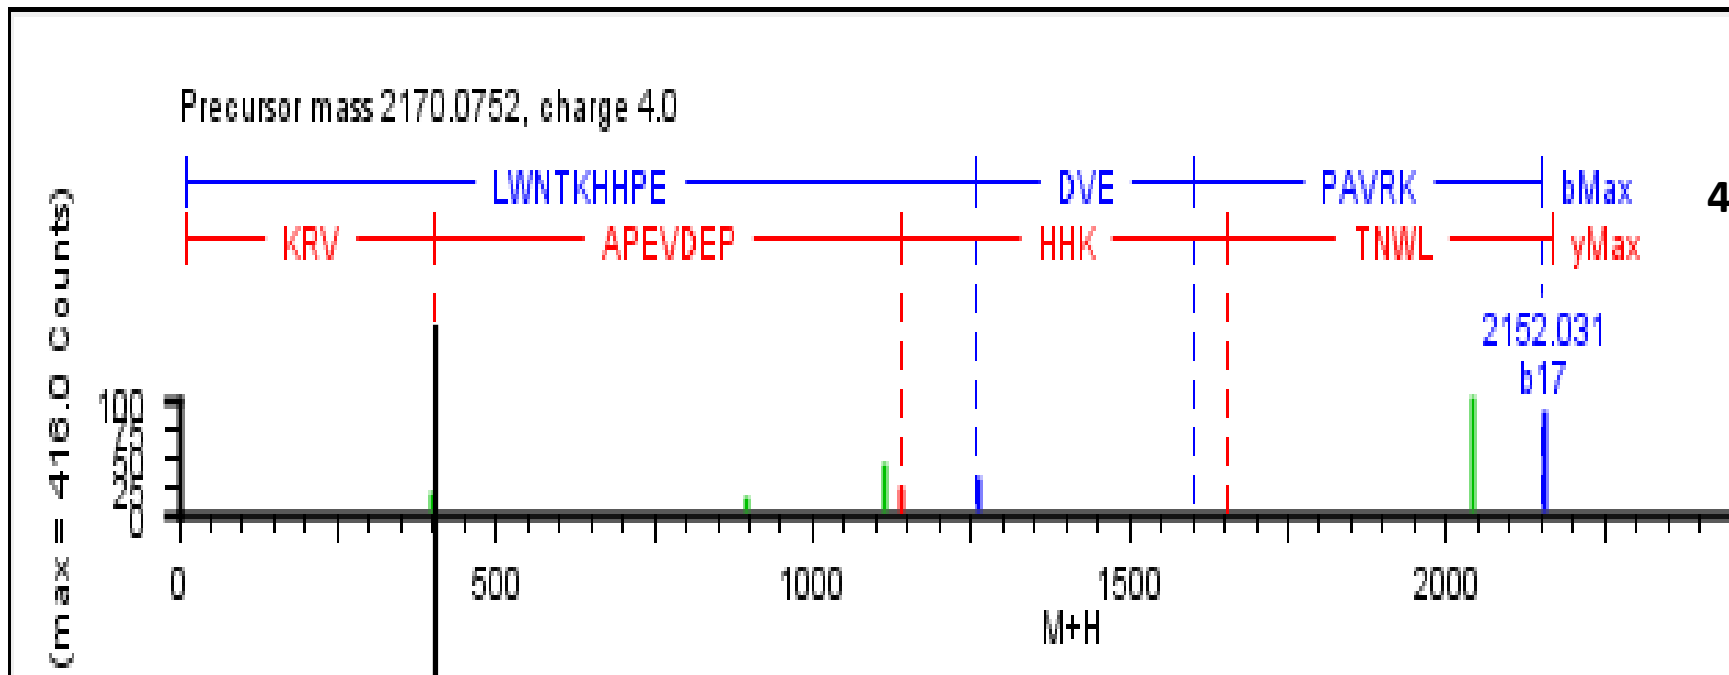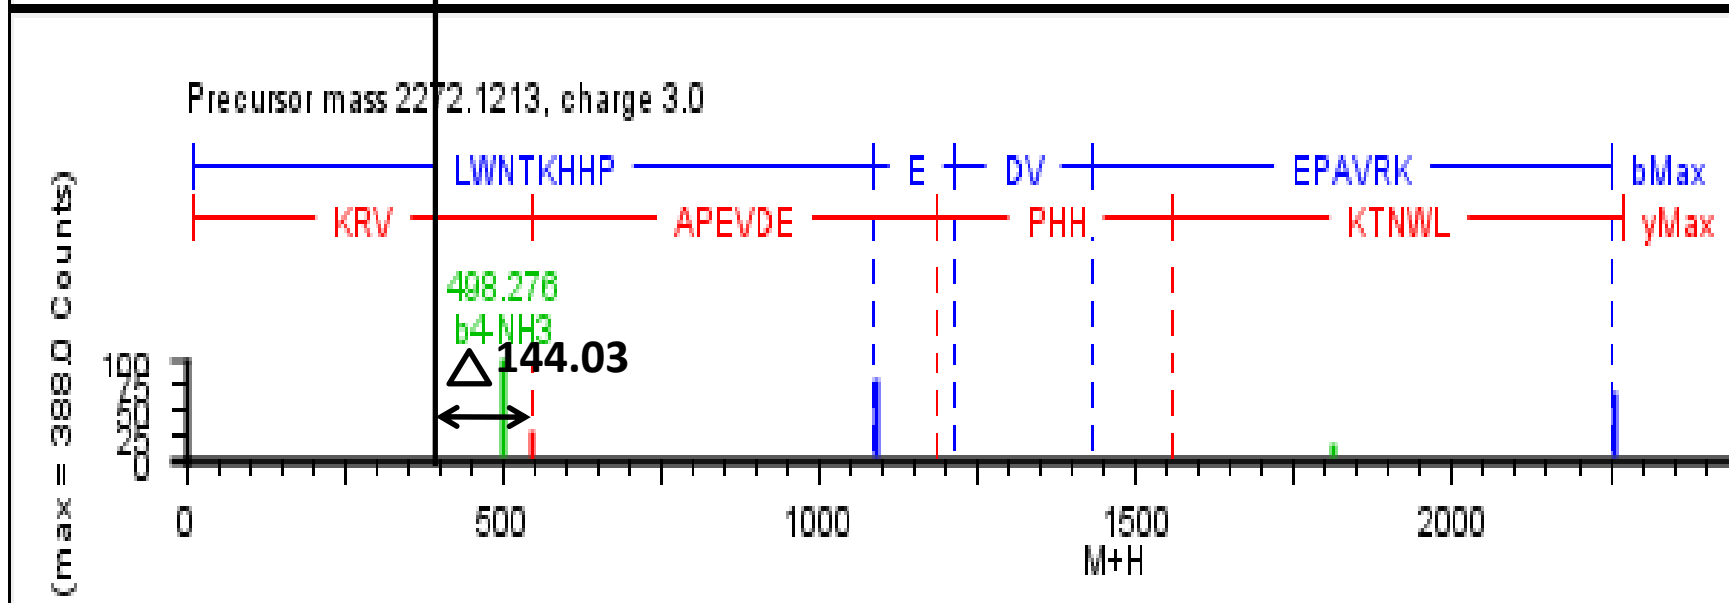

81-97

(K)LWNTKHHHPEDVEPAVRK(ImiA)(T)

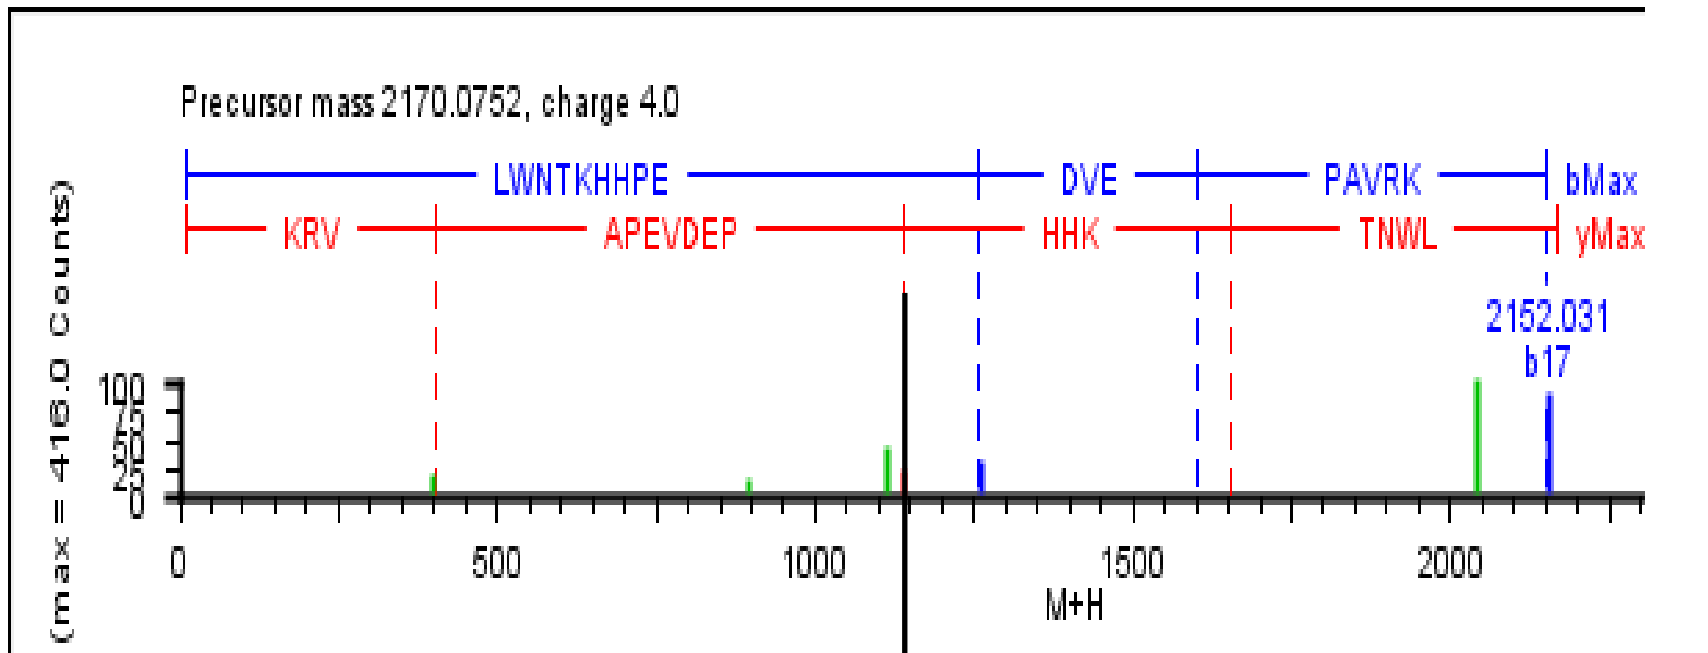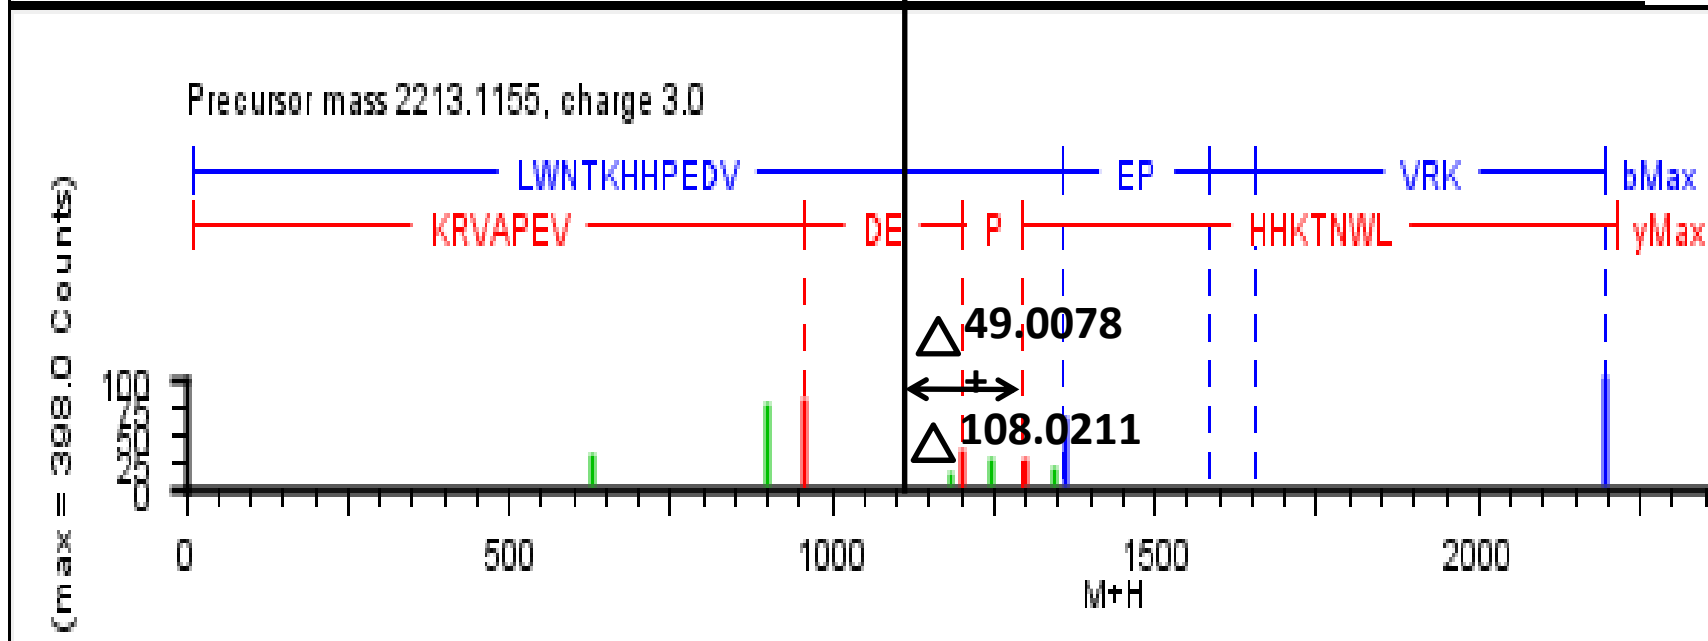

81-97

(K)LWNTKHHPEDVEPAVR(MOLD)K(Pyrr)(T)

NaKT

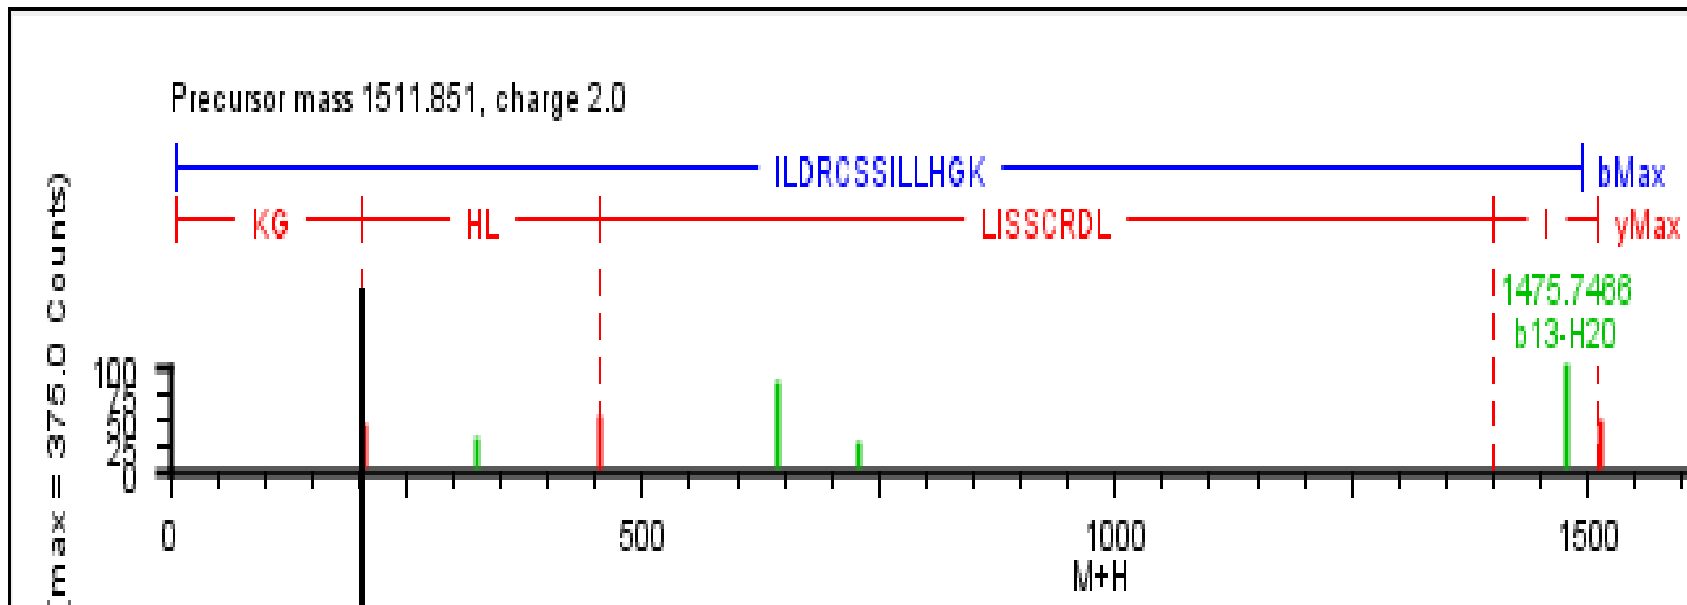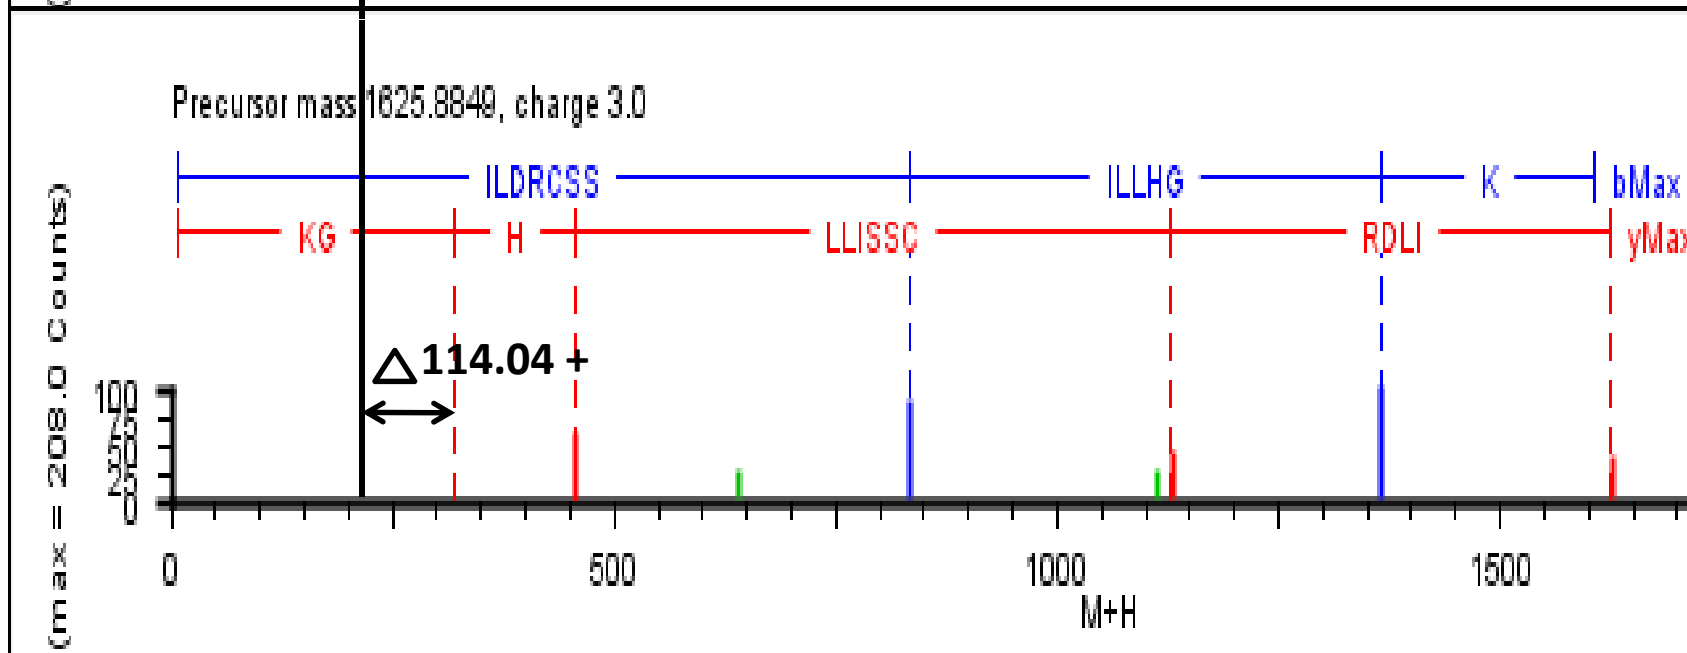

514-526

(R)ILDRCCSSILLHGK(Ubi)(E)

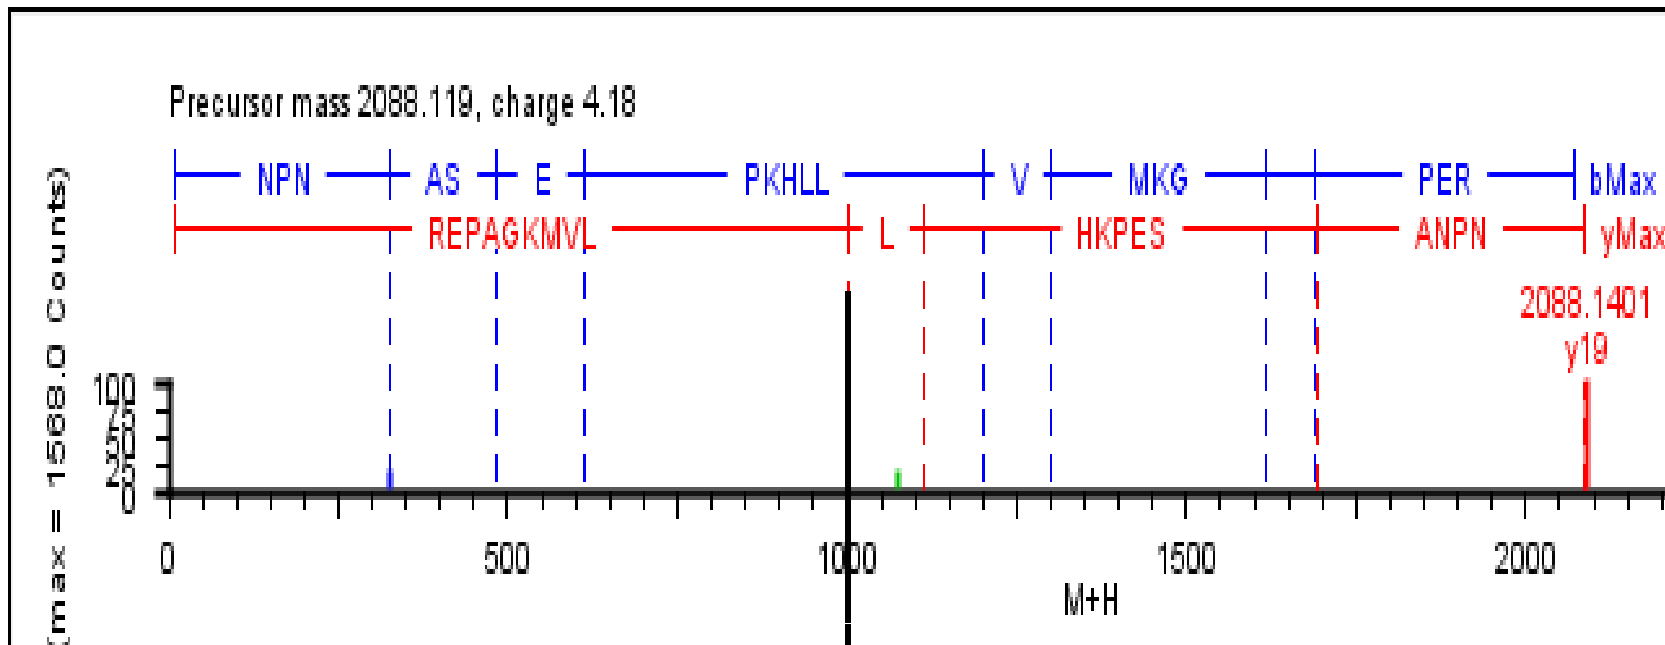

1113.6058

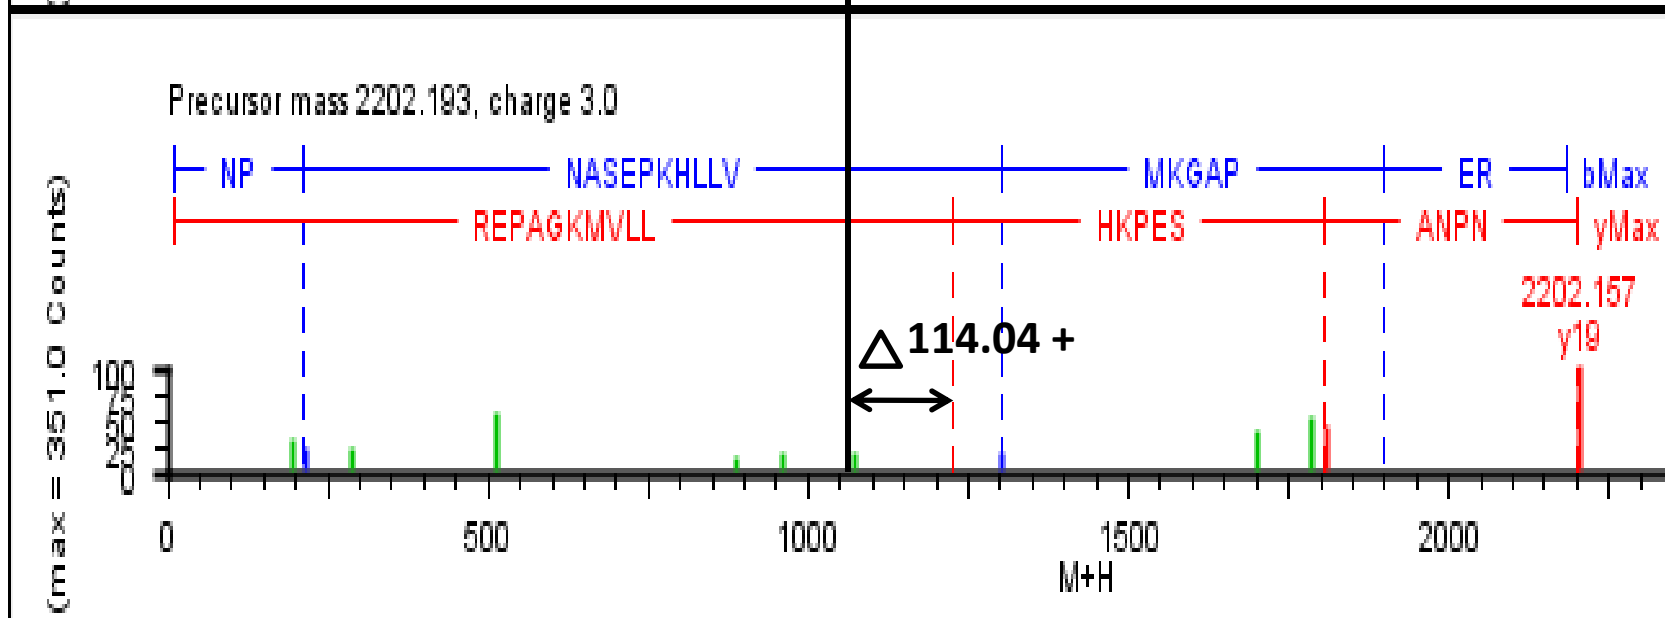

1227.7126:  
(1113.6+  
114.04)

495-513

(K)HLLVMK(Ubi)GAPER(I)



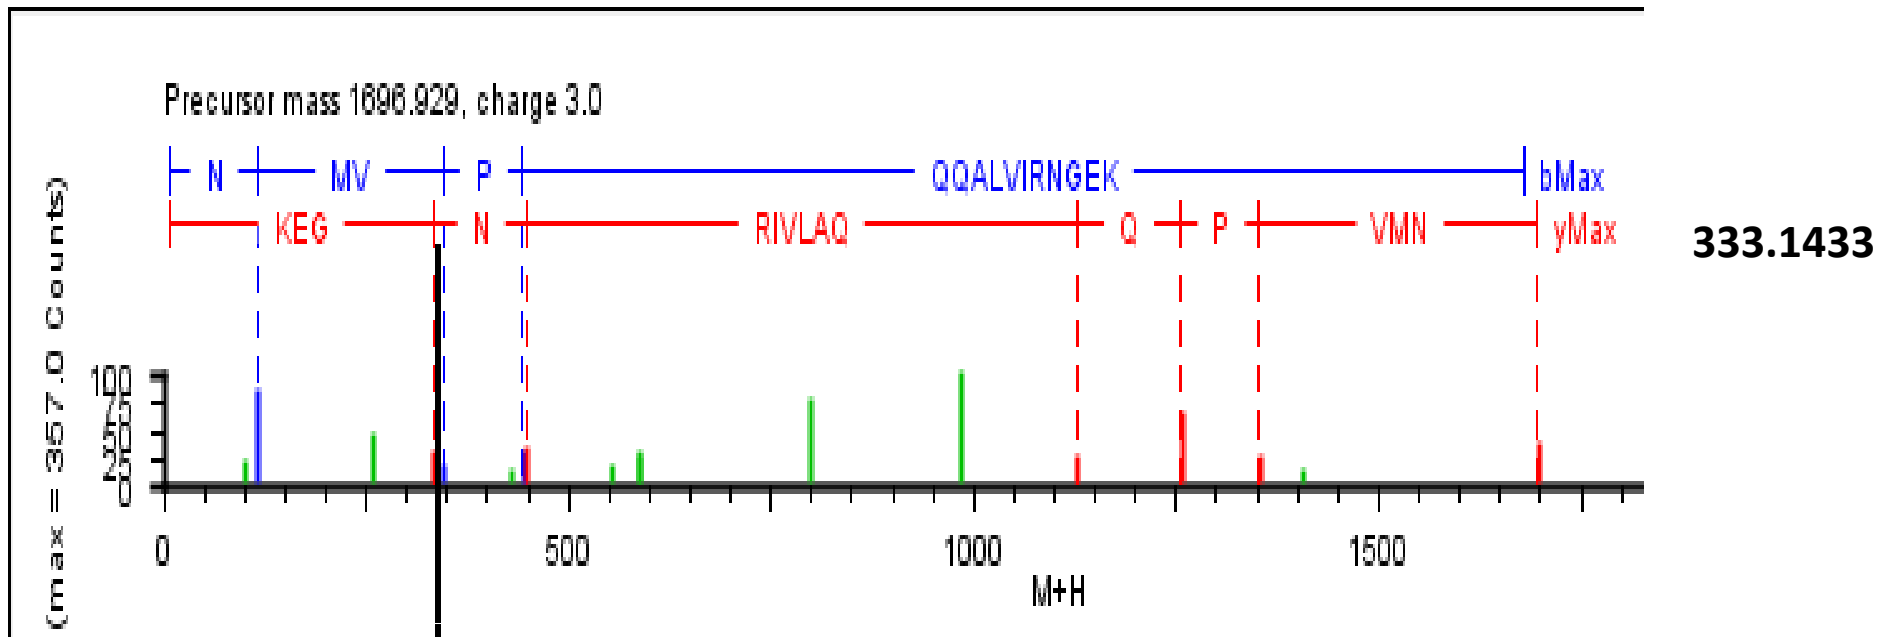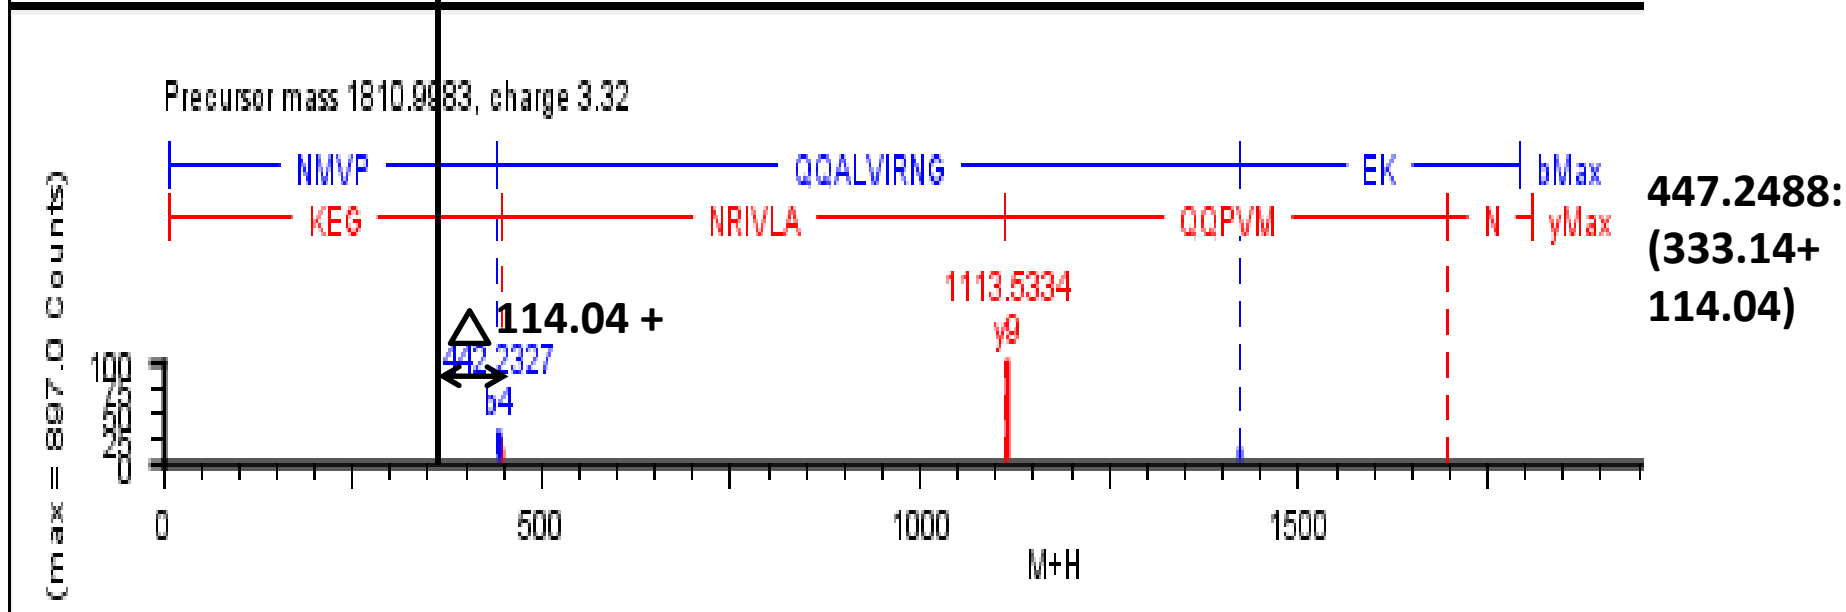

163-177

(K)NMVPQQALVIRNGEK(Ubi)(M)

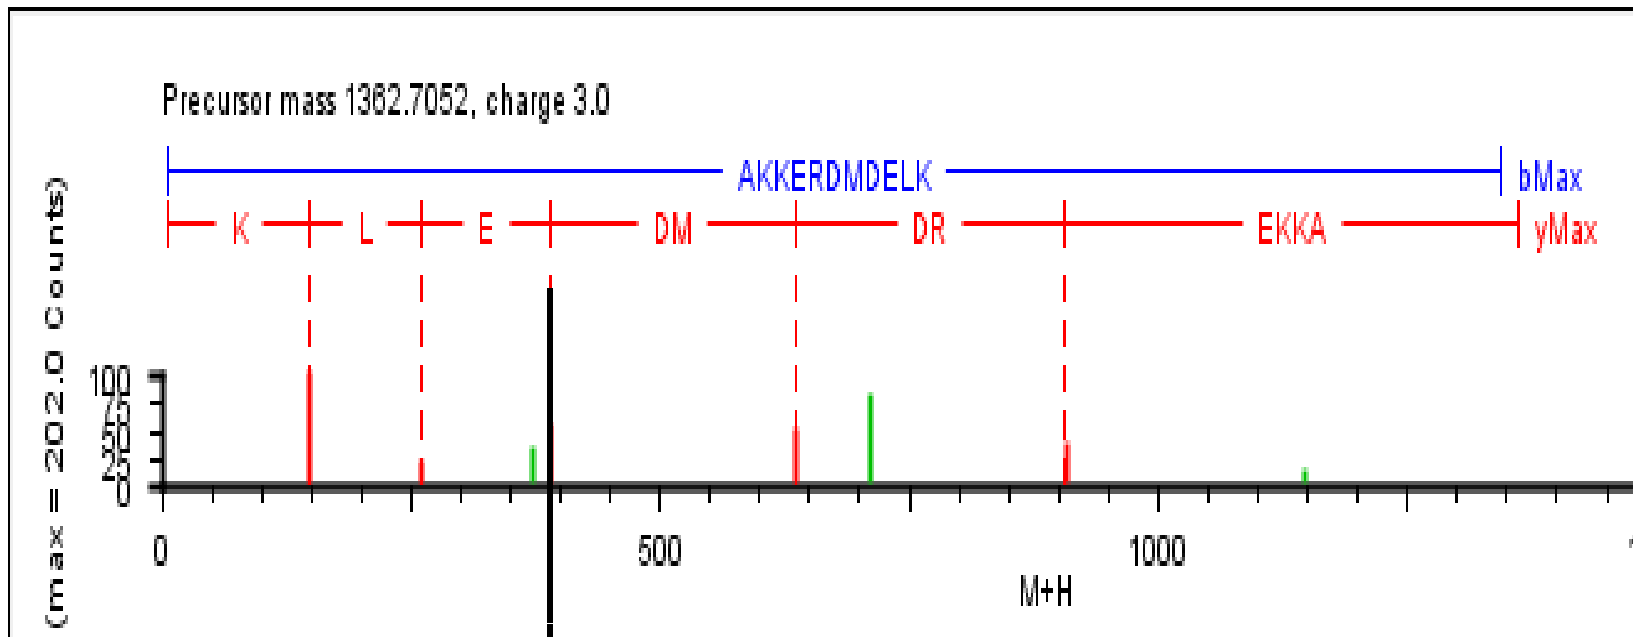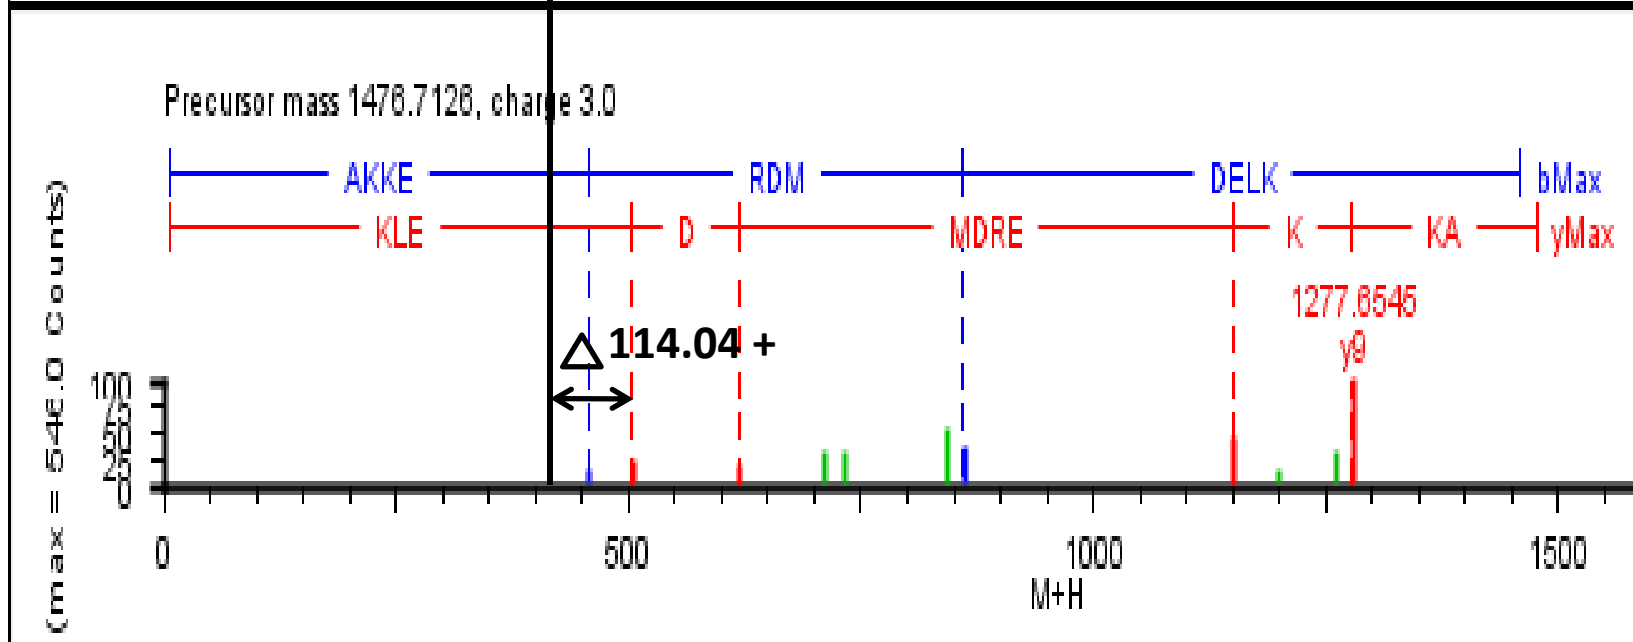

26-36

(K)AKKERDMDDELK(Ubi)(K)

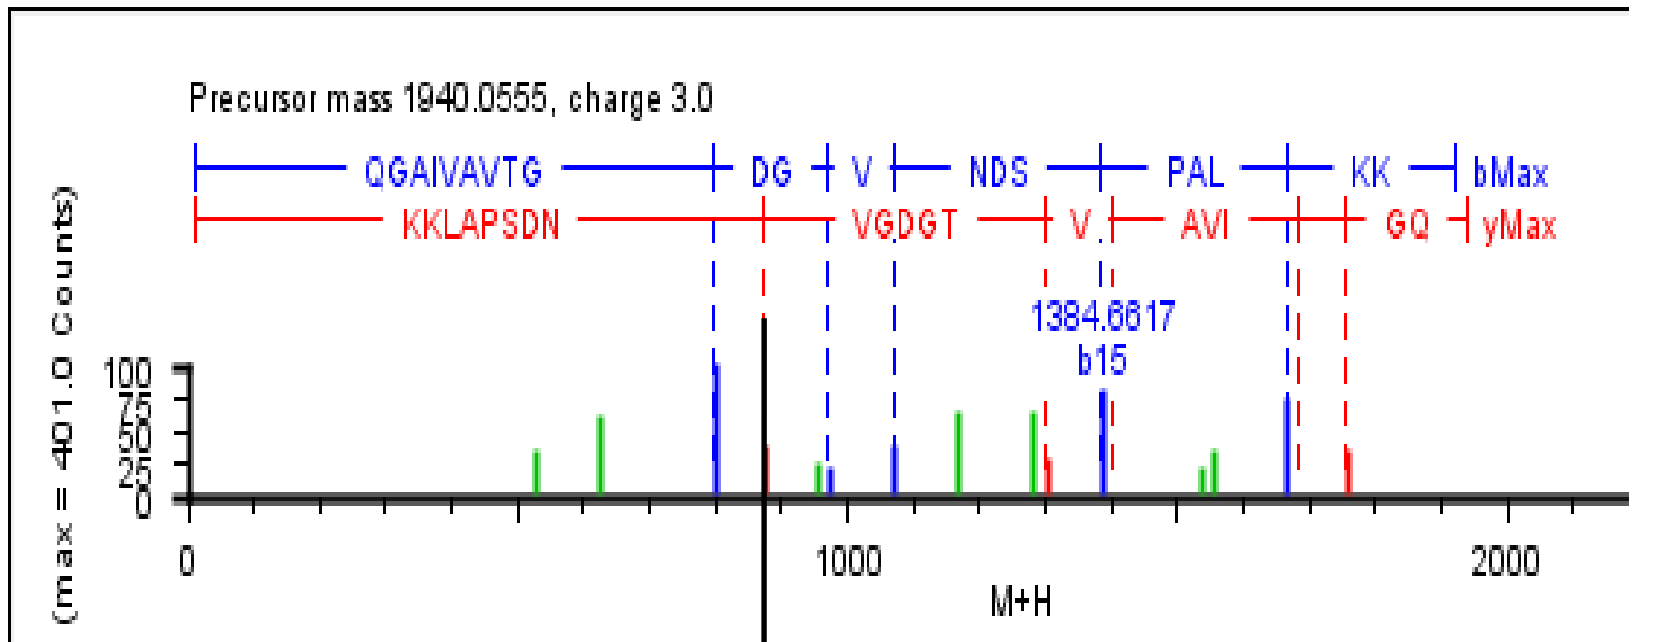

872.4454

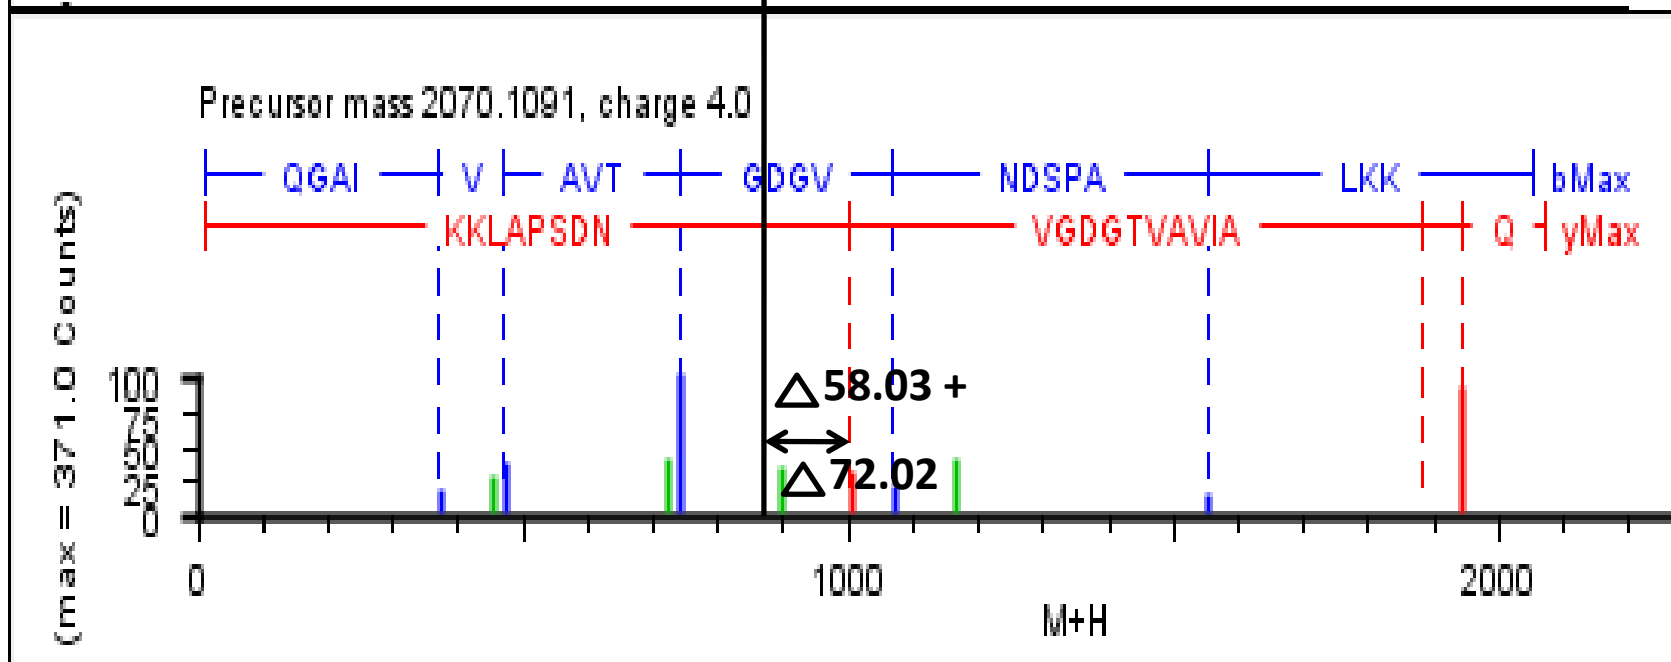

1002.4733  
(872.44+  
72.02+  
58.02)

708-727

(R)QGAI VAVTGDGVNDSPALK(CEL)K(Pento)(A)

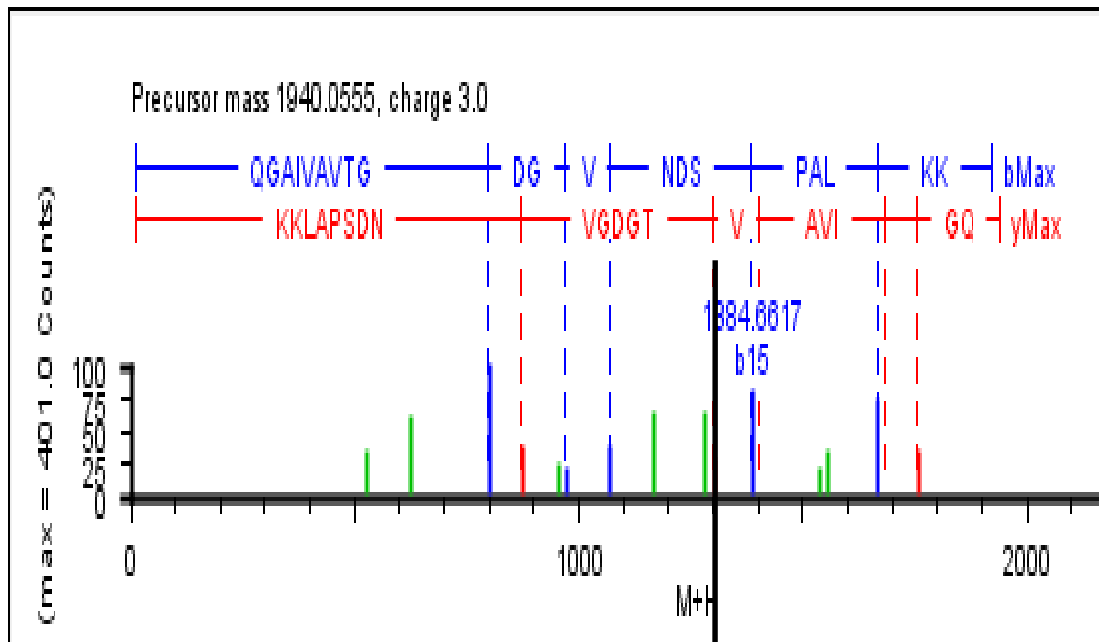

1301.5514

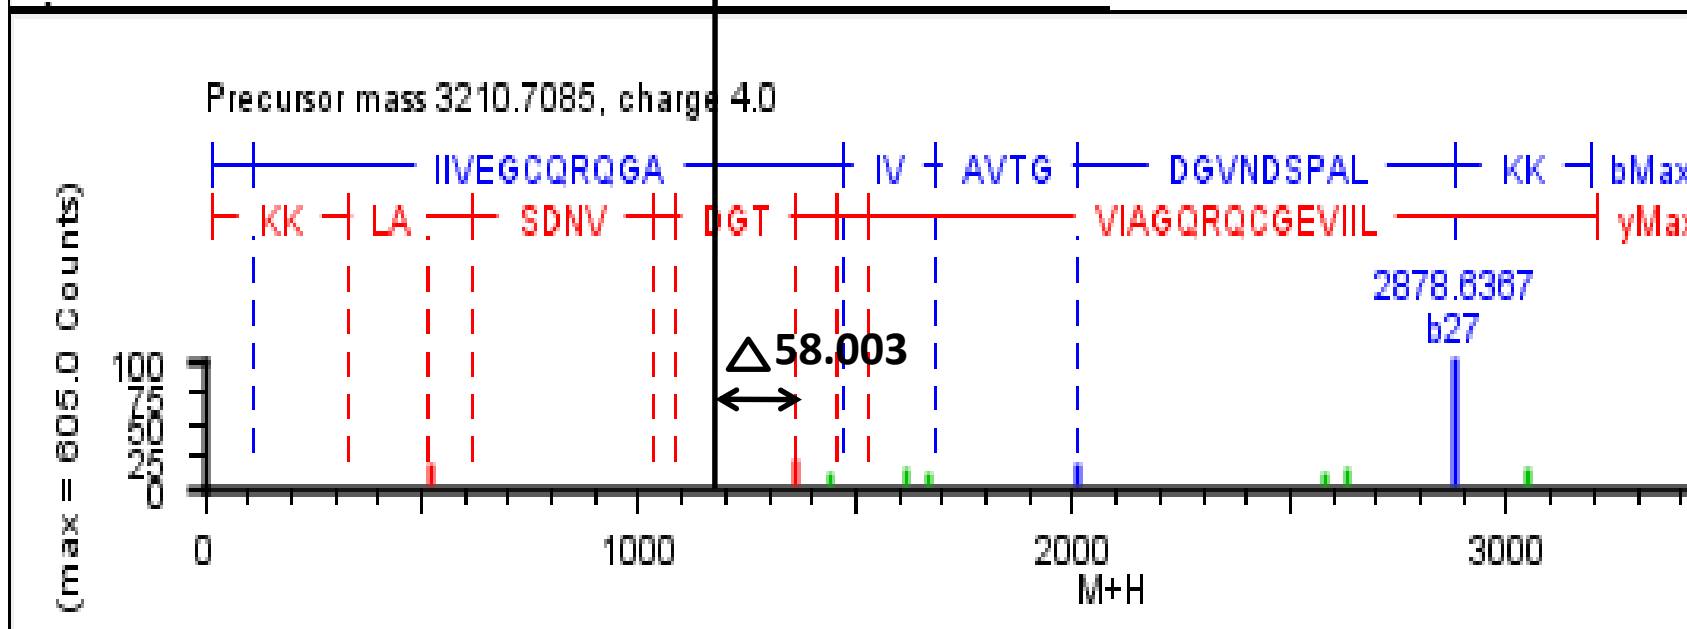

1359.5514:  
 (1301.55+  
 58.00)

699-727

(K)LIIVEGCQRQGAIVAVTGDGVNDSPALK(CML)K(A)

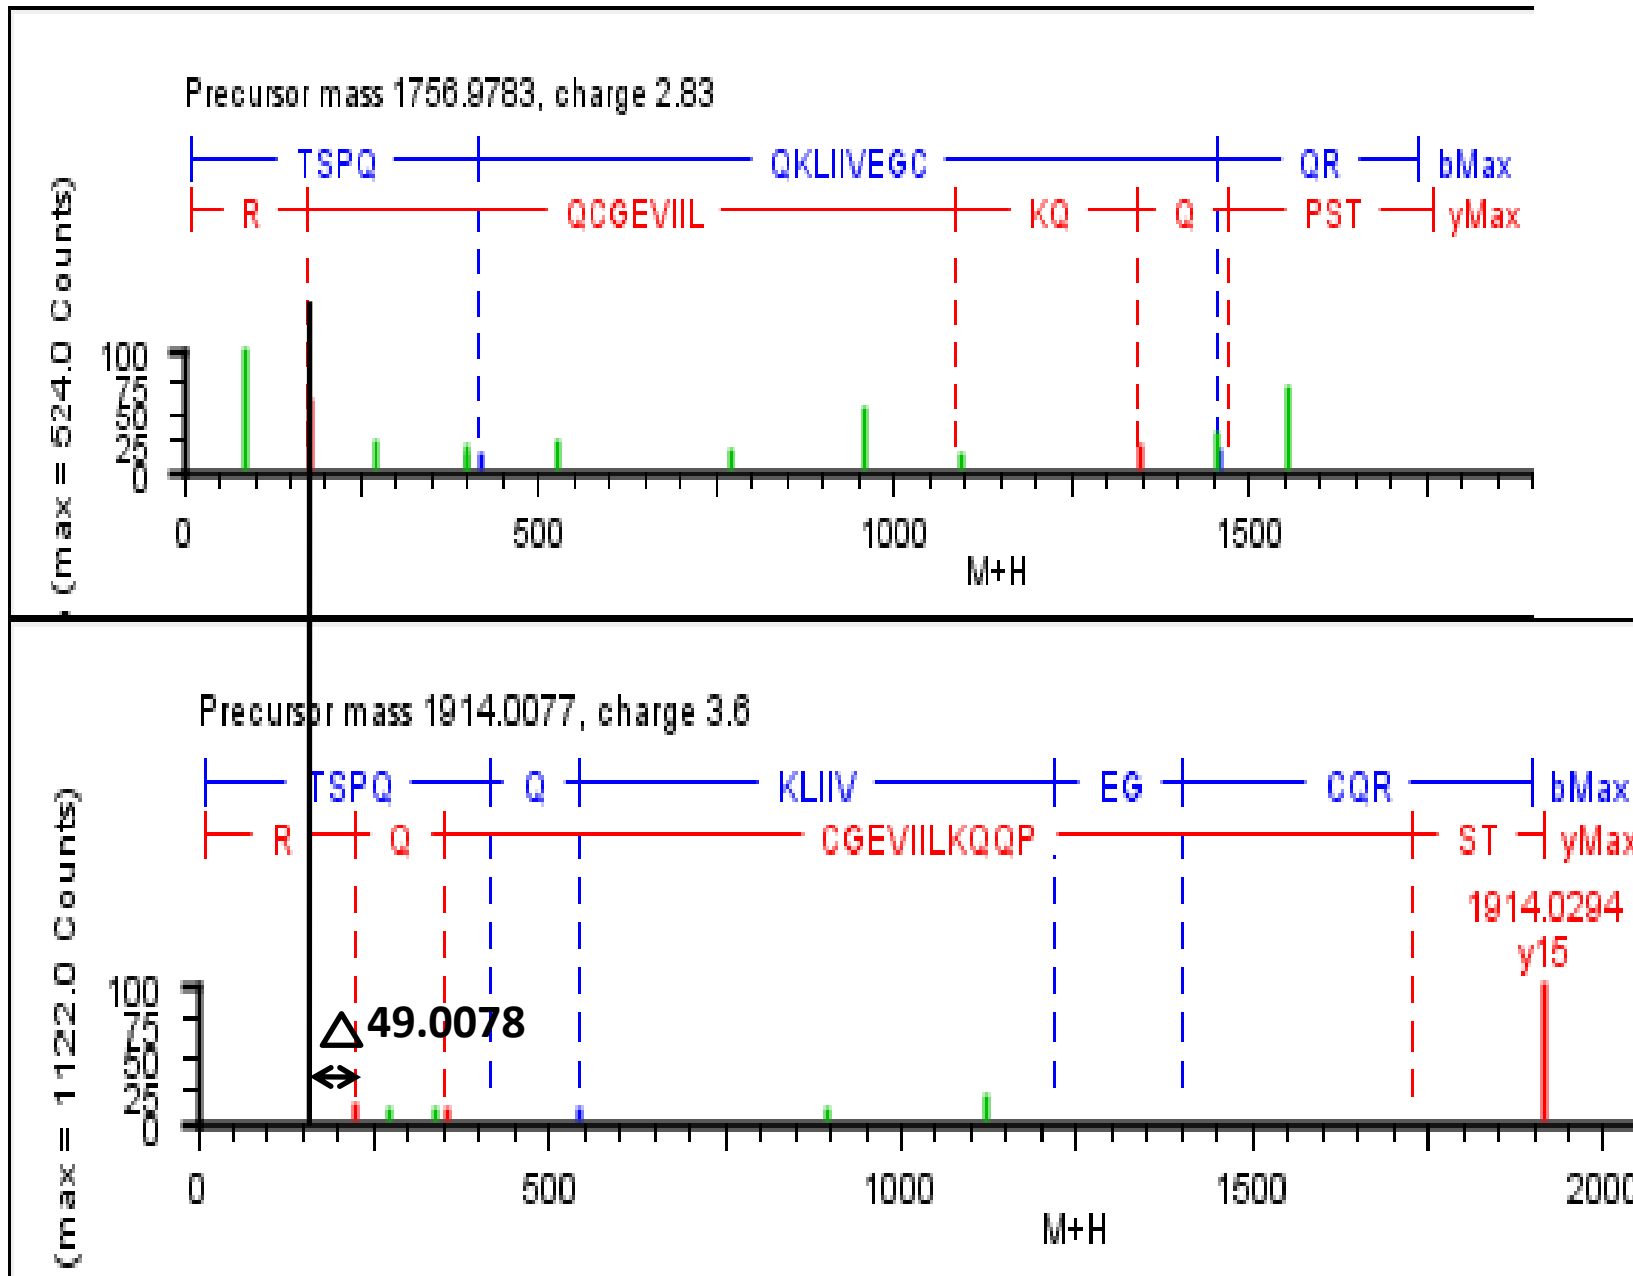

175.1153

224.1323:  
(175.11+  
49.00)

693-707

(R)TSPQQKLIIVEGCQR(MOLD)(Q)

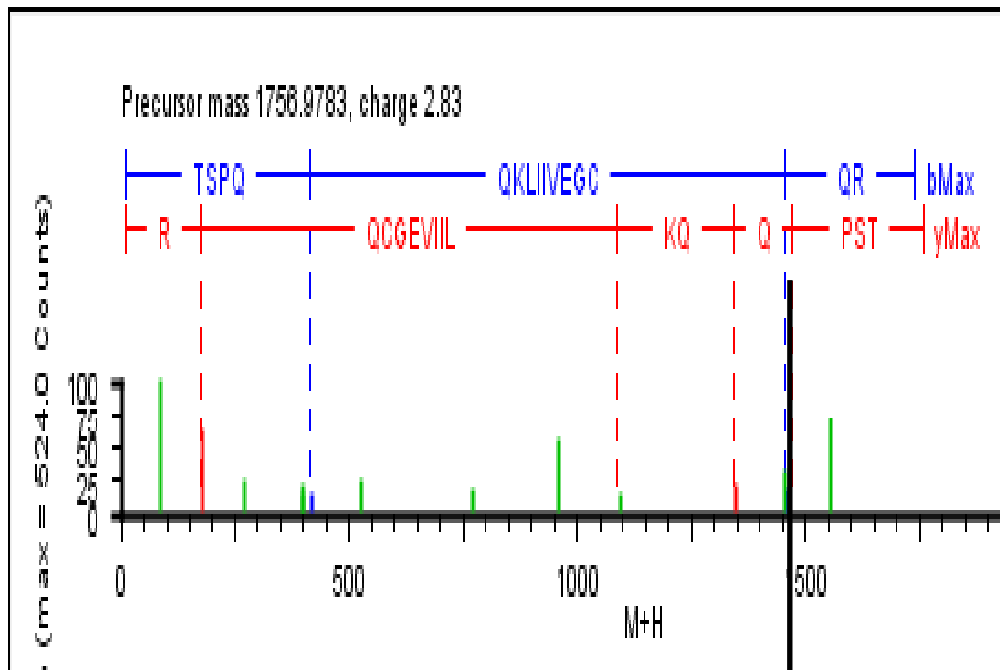

1343.5881

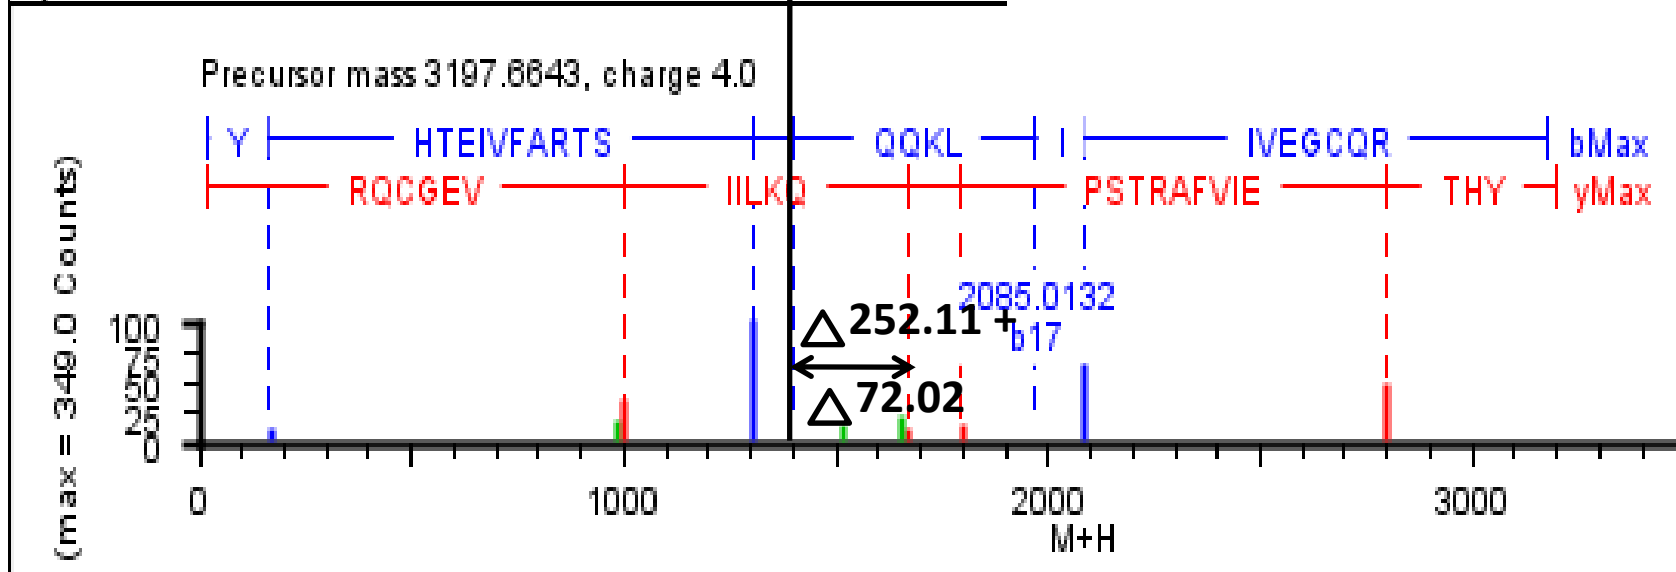

1667.7557:  
 (1343.58+  
 72.02+ 252.11)

684-707

(R)YHTEIVFARTSPQQK(CEL)LIIVEGCQR(Crossline)(Q)

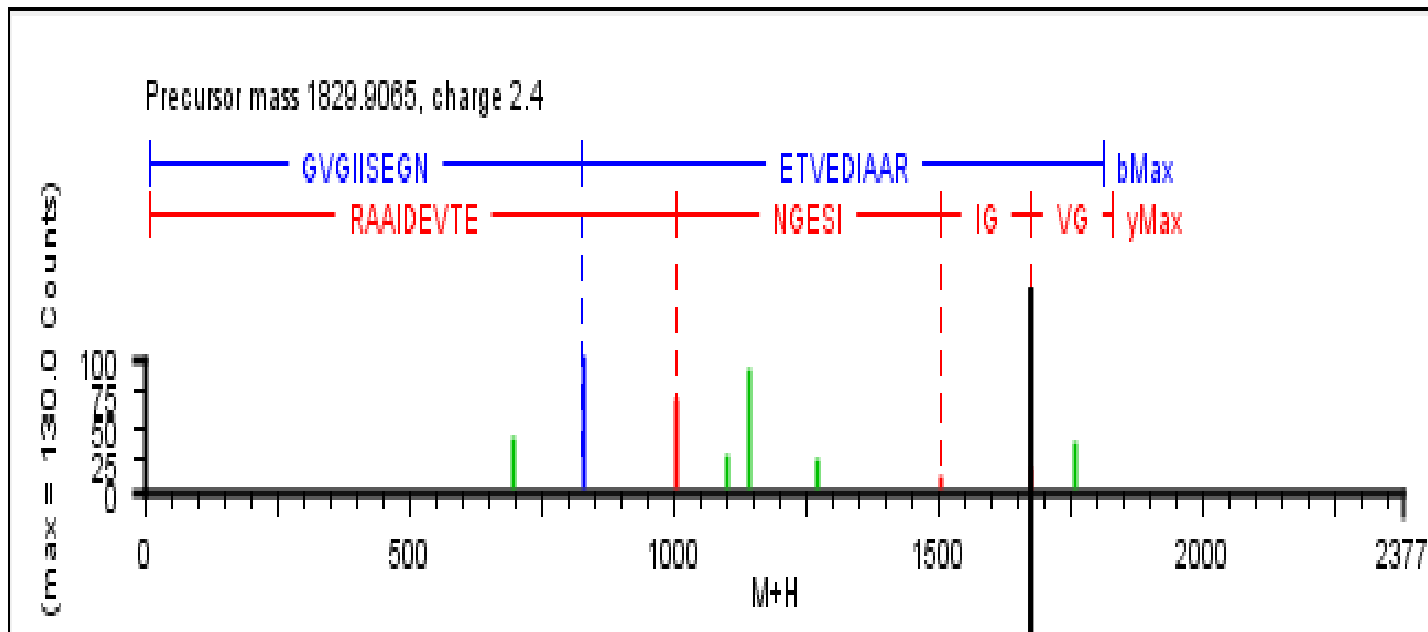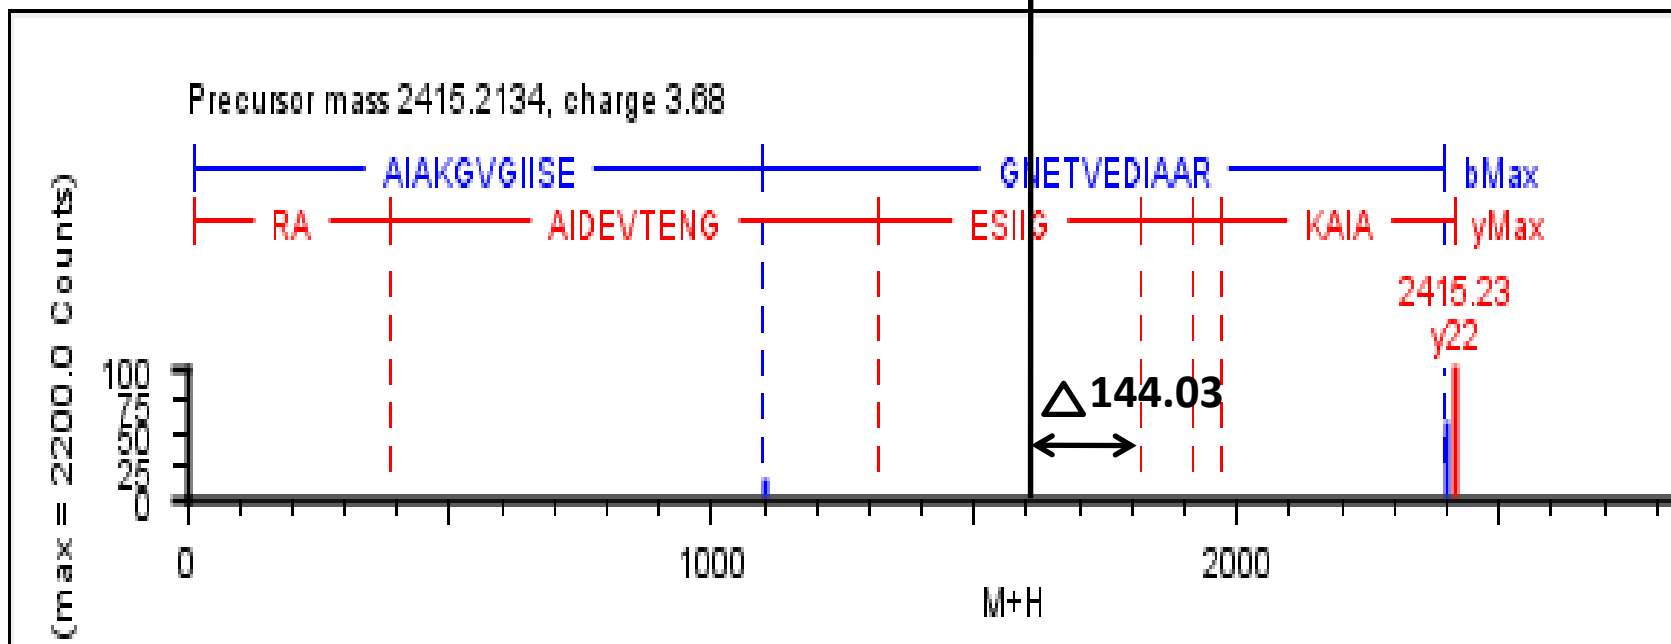

626-647

(K)AIAKGVGIISEGN**R**(ImiA)(L)

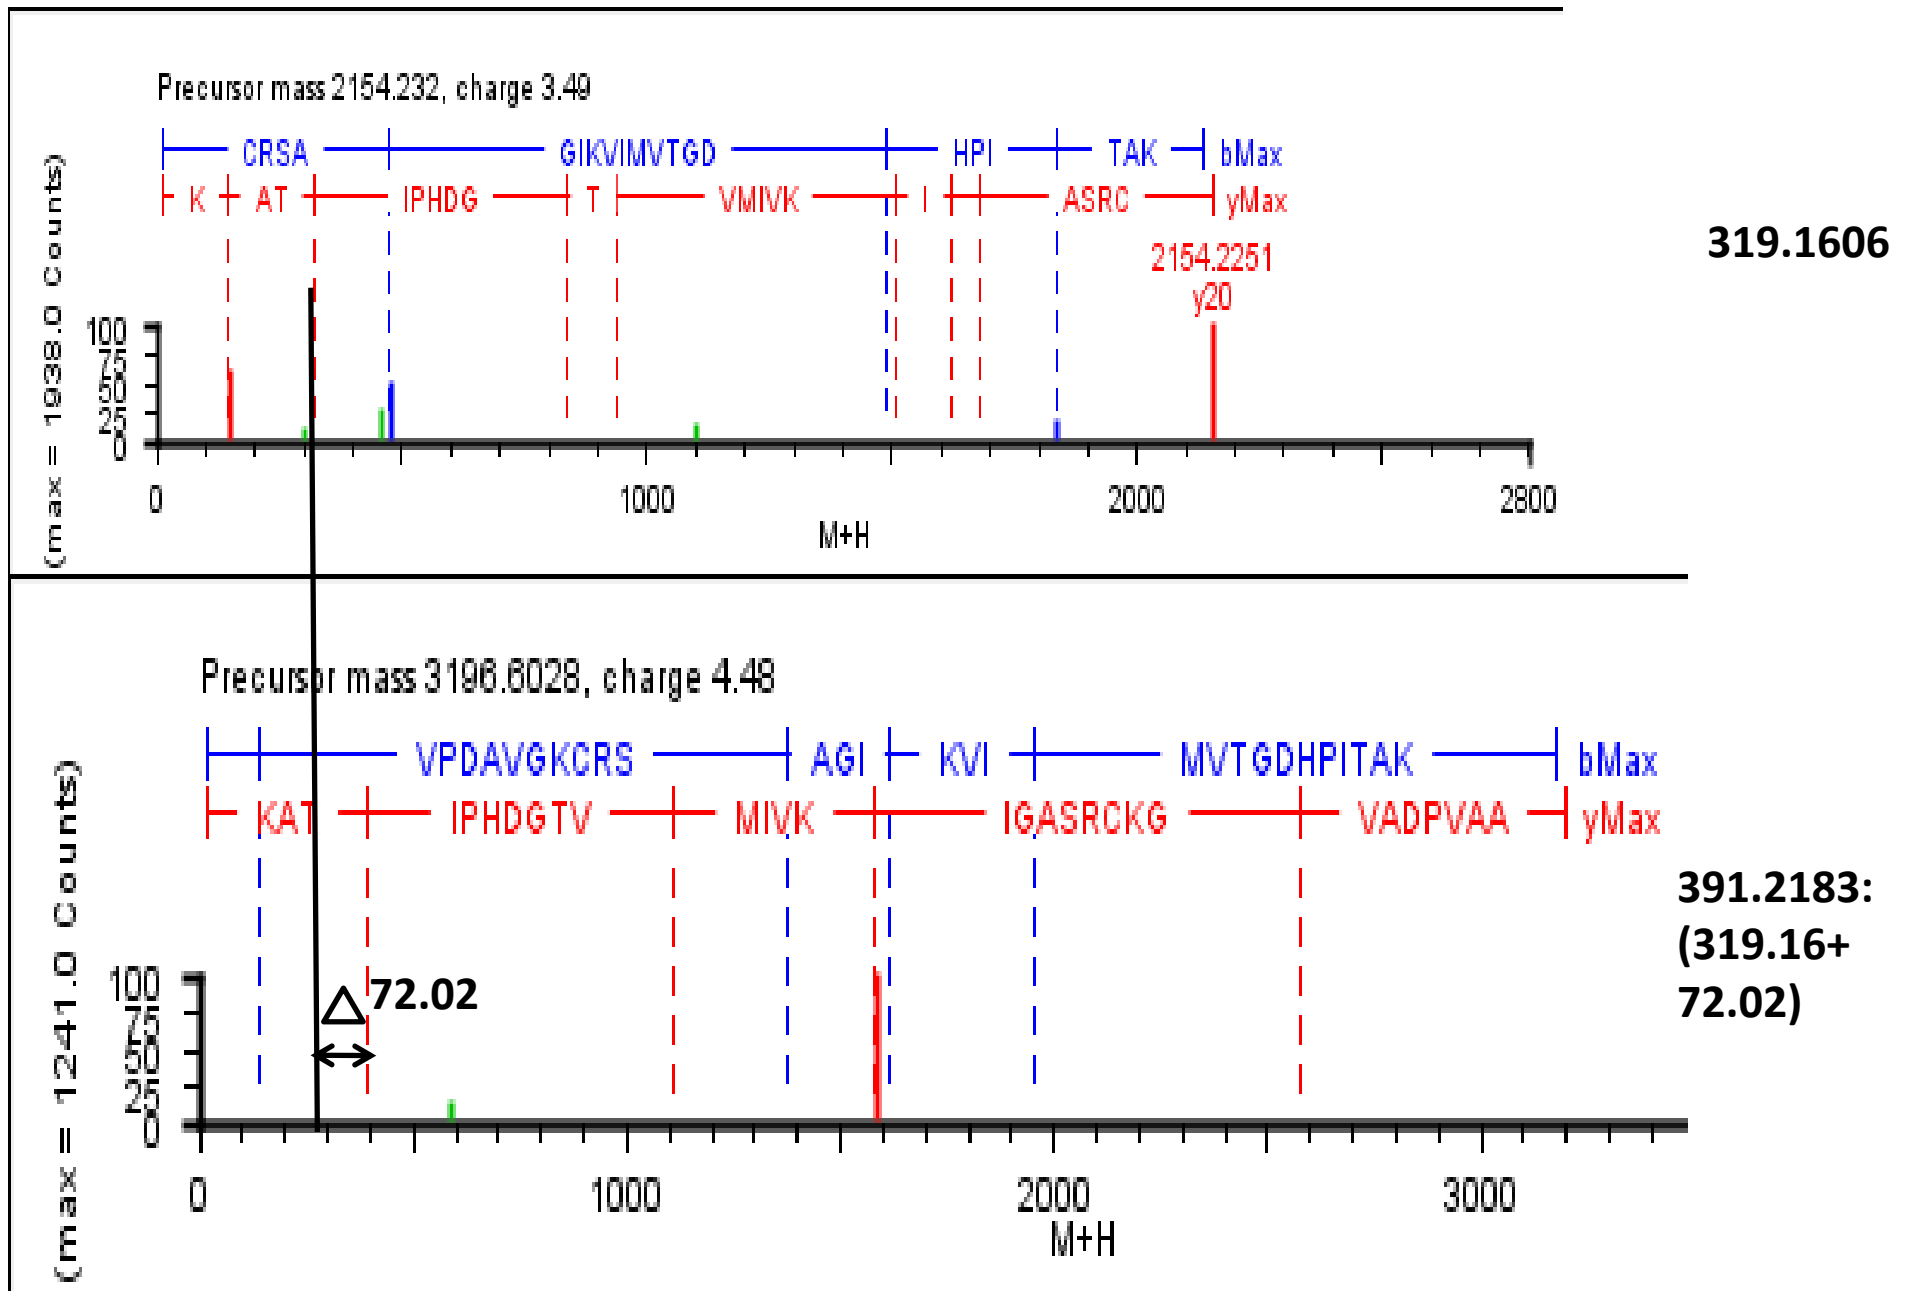

**319.1606**

**391.2183:  
 (319.16+  
 72.02)**

**597-625**

**(R)AAVPDAVGKCRSAGIKVIMVTGDHPITAK(CEL)(A)**



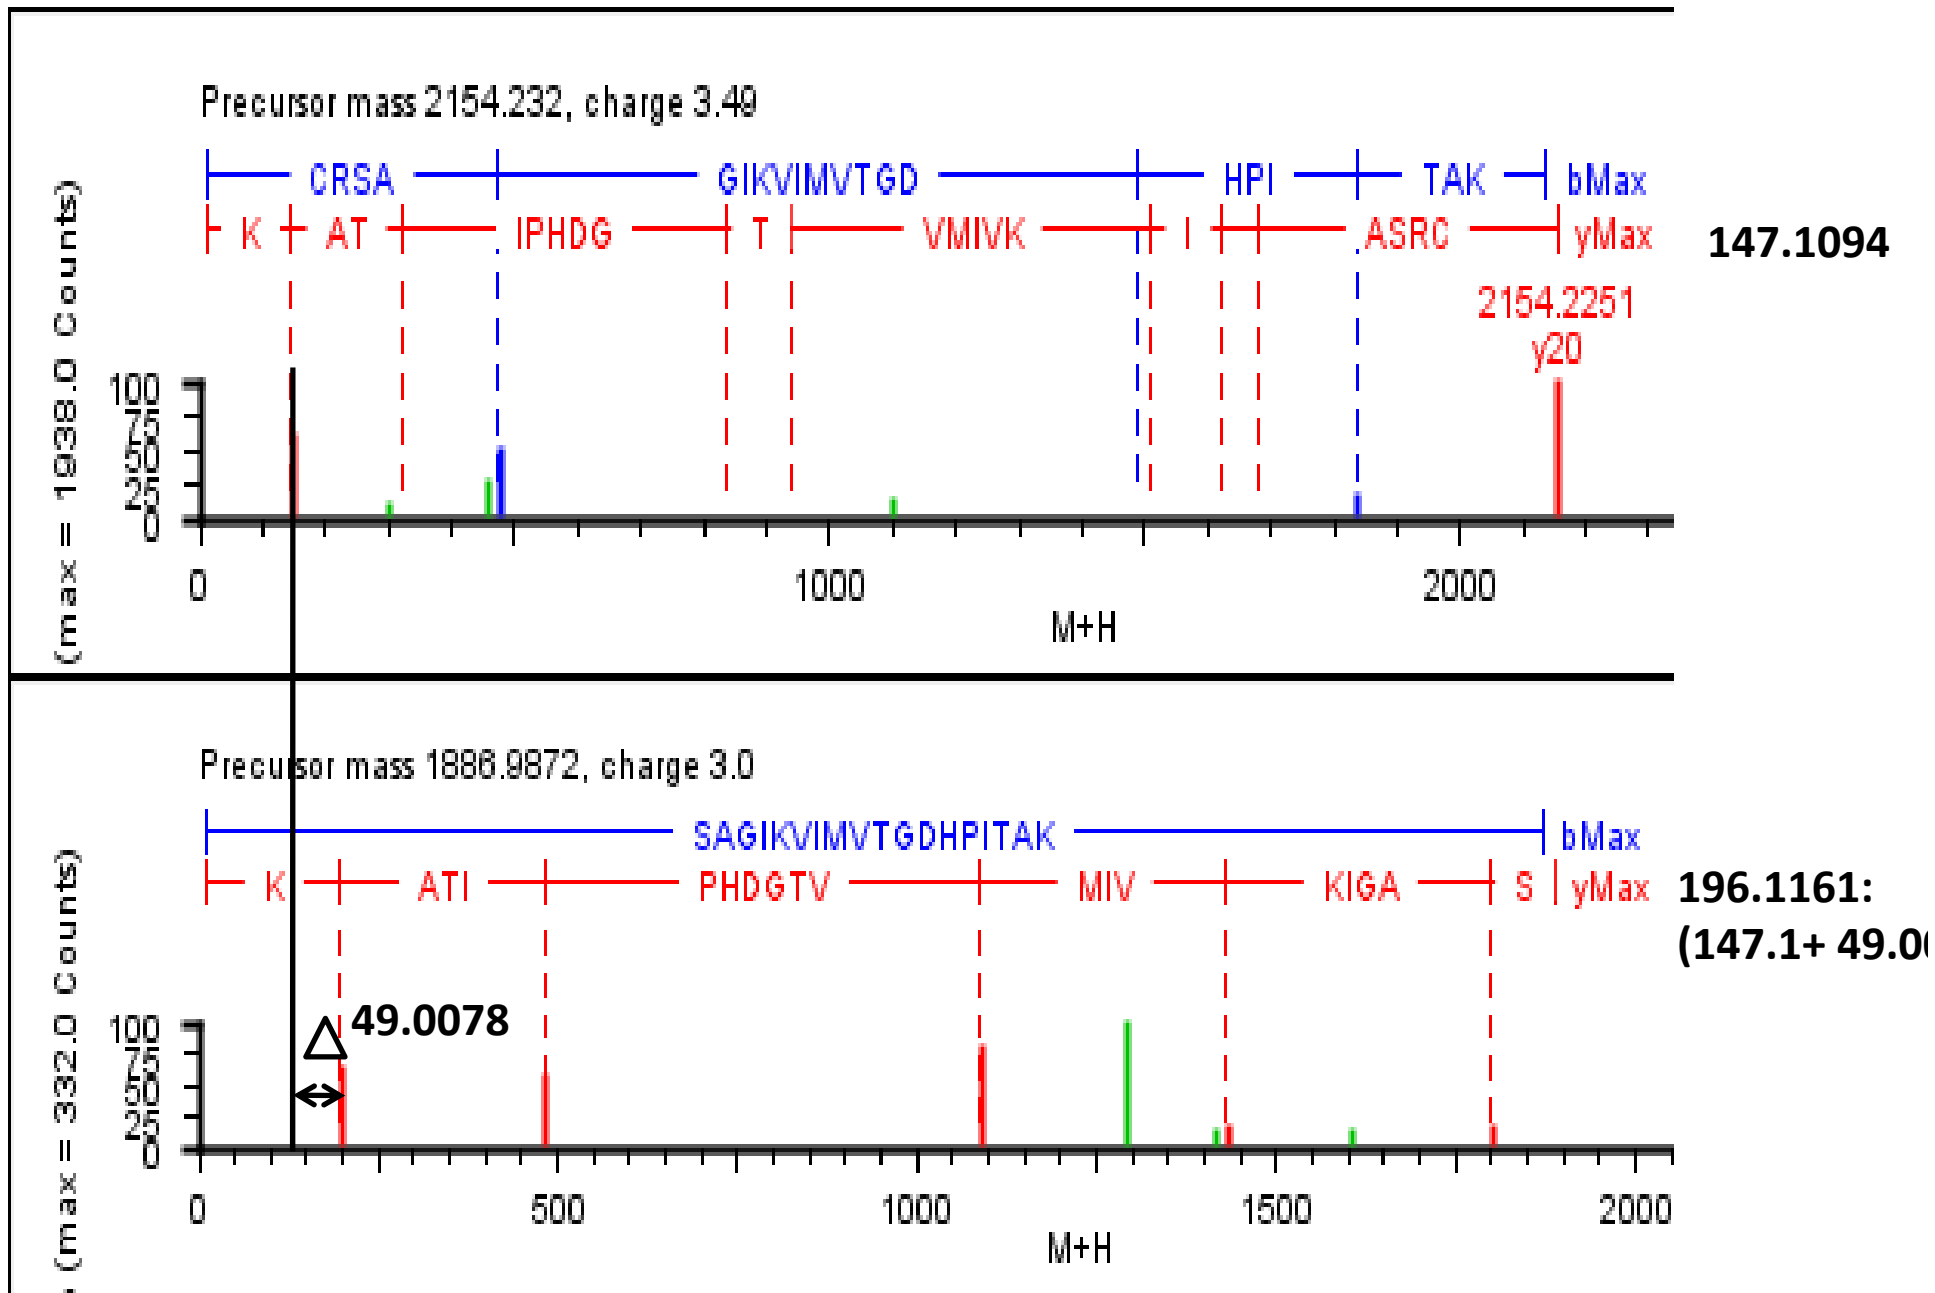

608-625

(R)SAGIKVIMVTGDHPITAK(MOLD)(A)

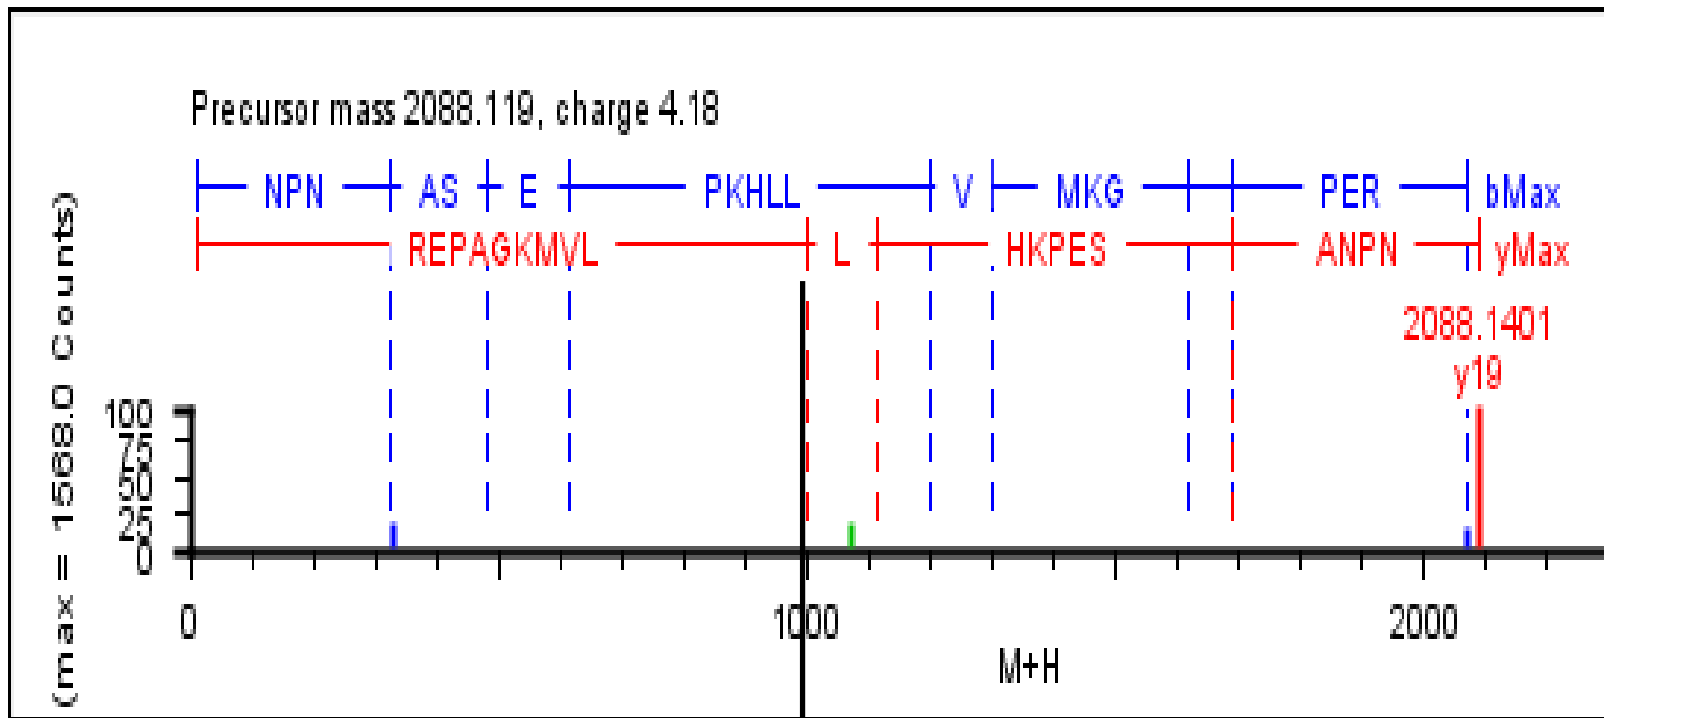

1000.6045

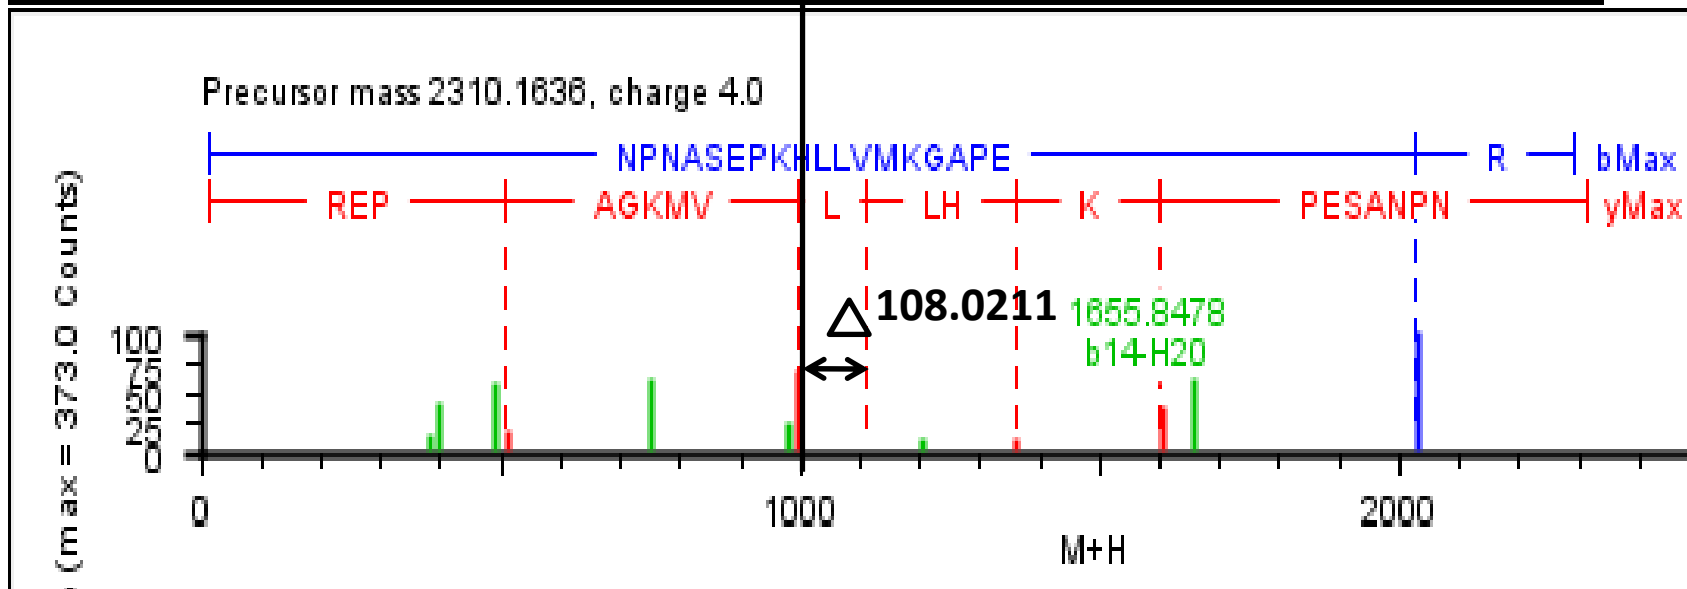

1108.4863:  
 (1000.6+  
 108.02)

495-513

(K)NPNASEPKHLLVMKGAPER(Pyr)(I)

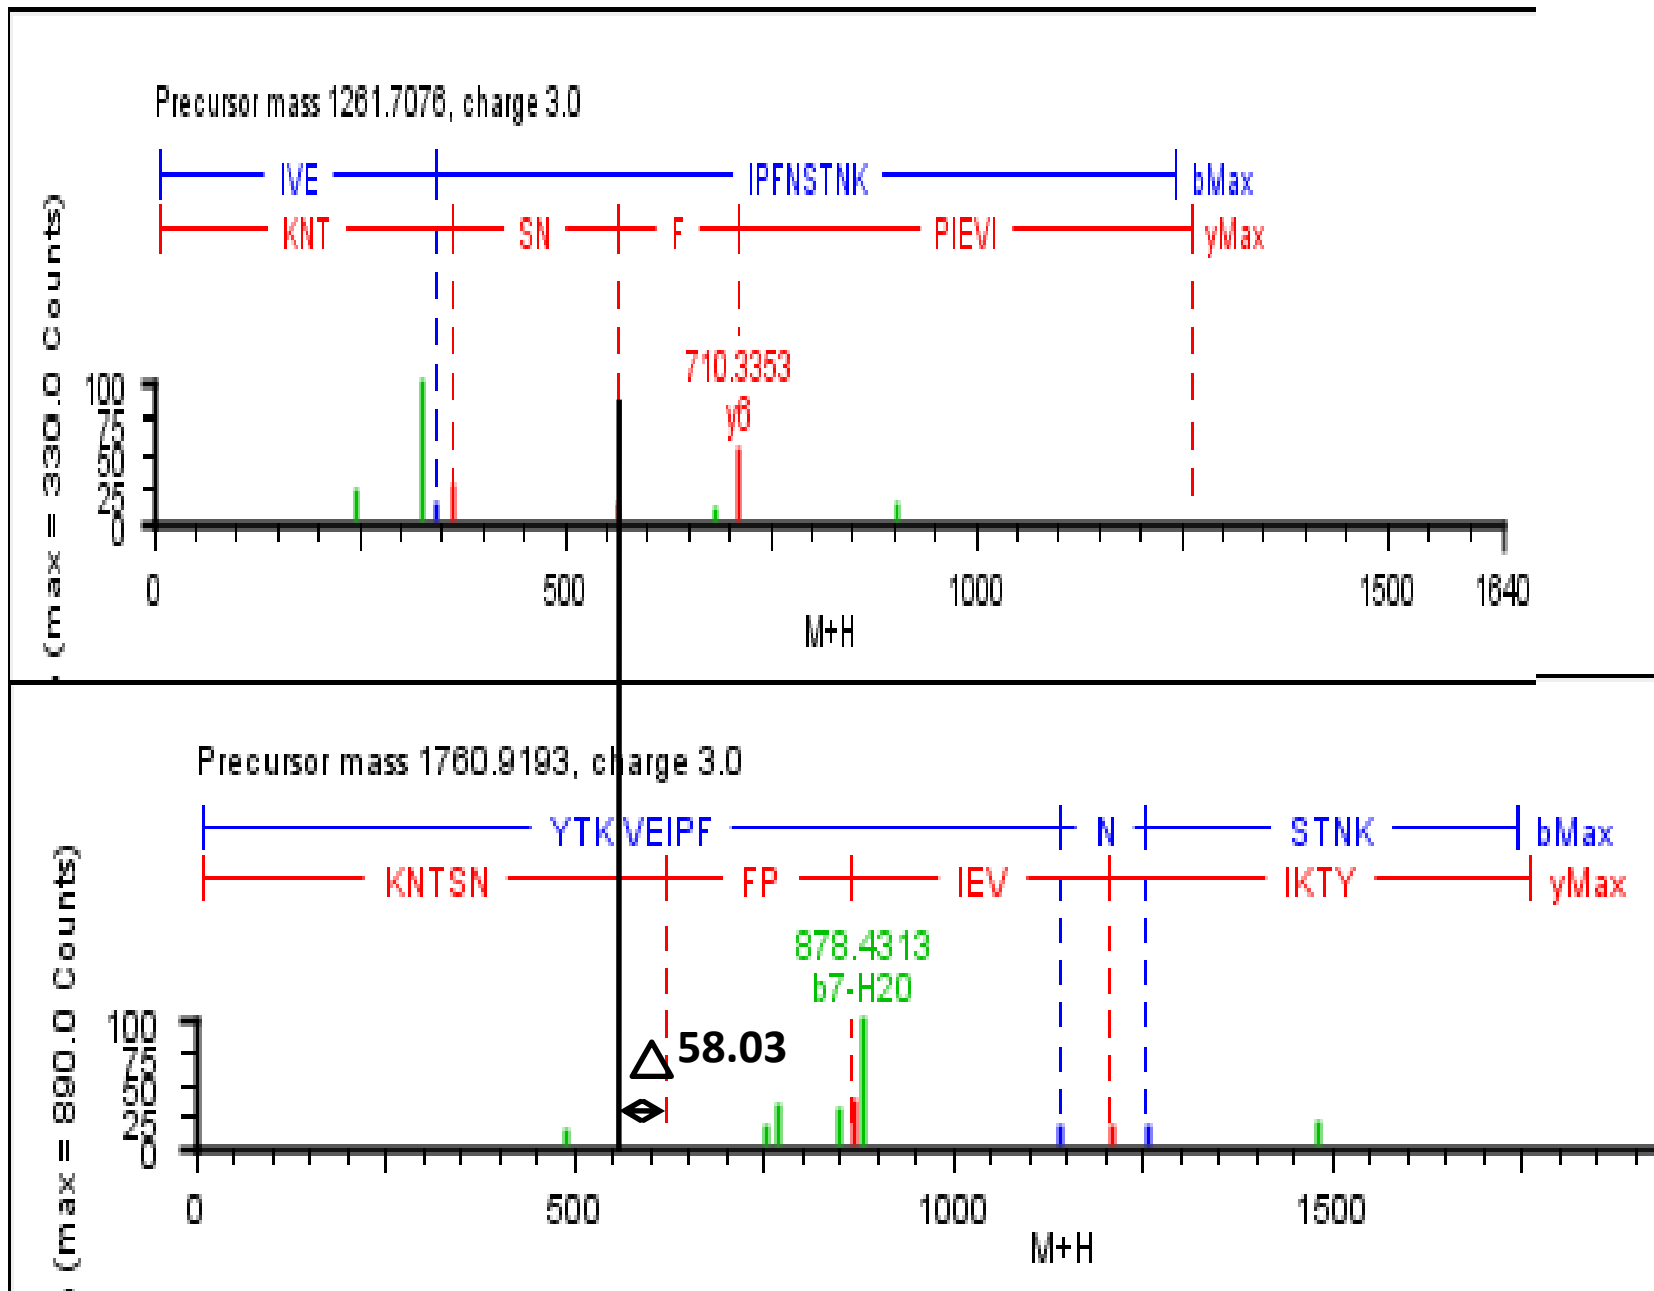

563.3173

621.349:  
(563.31+  
58.03)

474-487

(K)YTKIVEIPFNSTNK(Pento)(Y)

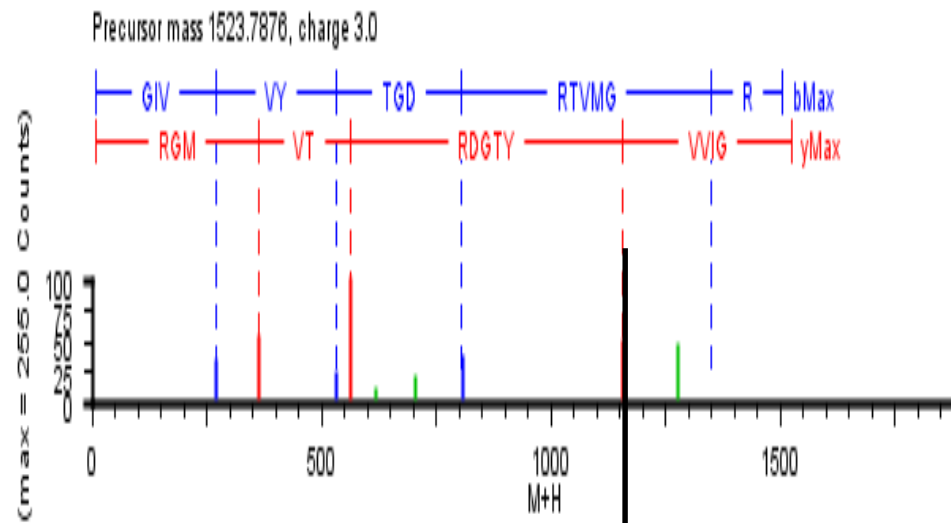

1155.5348

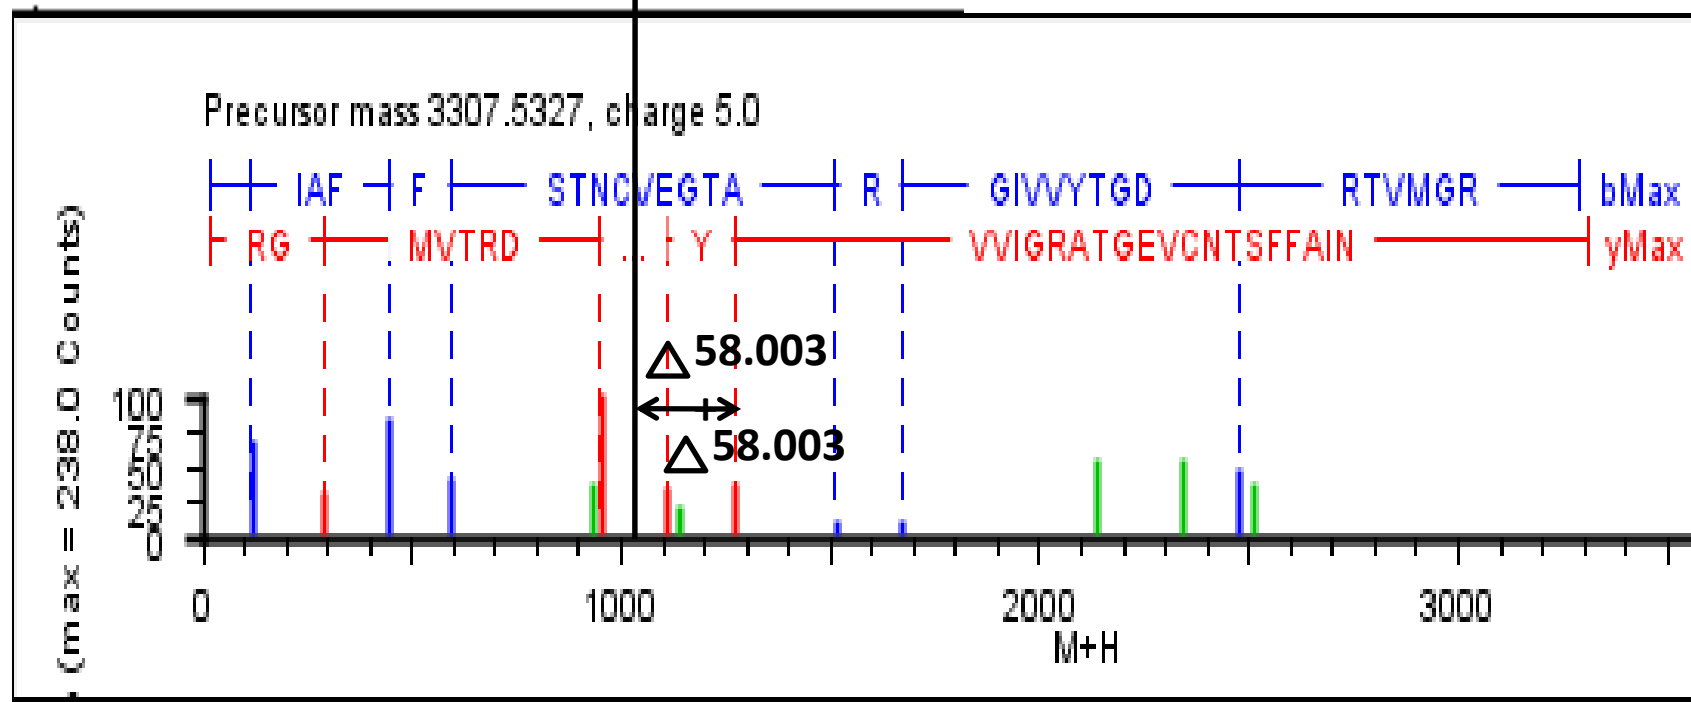

1271.5724:  
(1155.53+  
58.0035+  
58.003)

241-269

(R)NIAFFSTNCVEGTARGIVVYTGD**R(CML)TVMGR(CML)**(I)

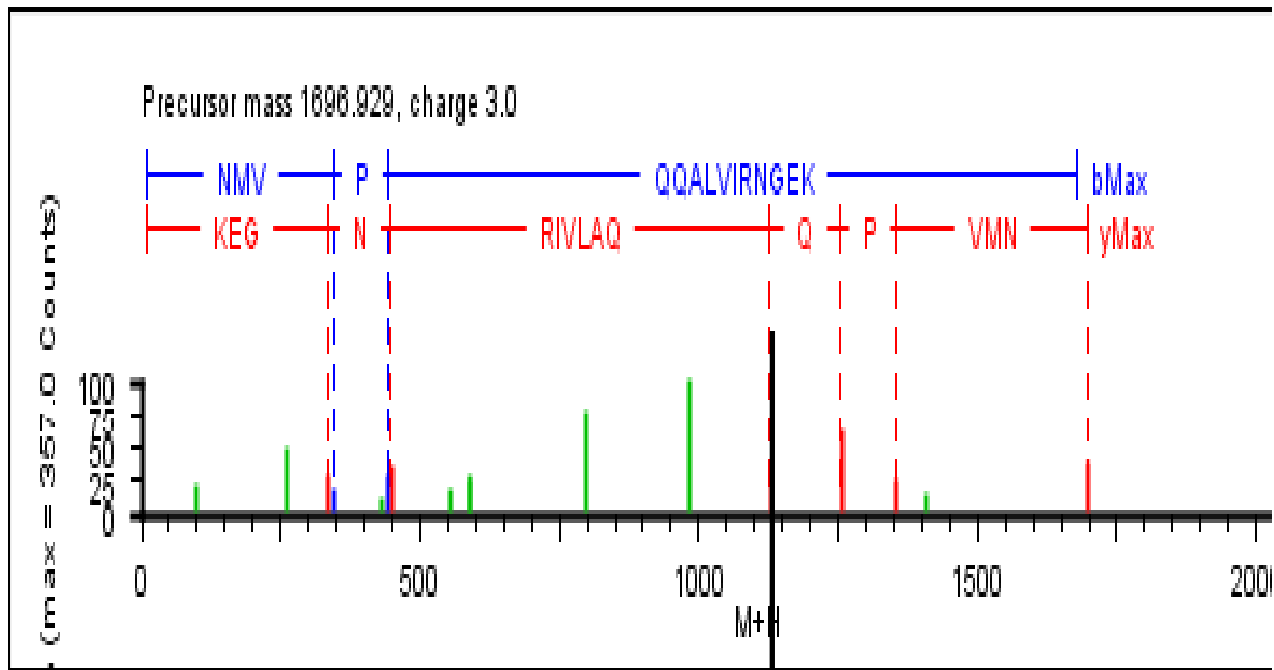

**1127.5831**

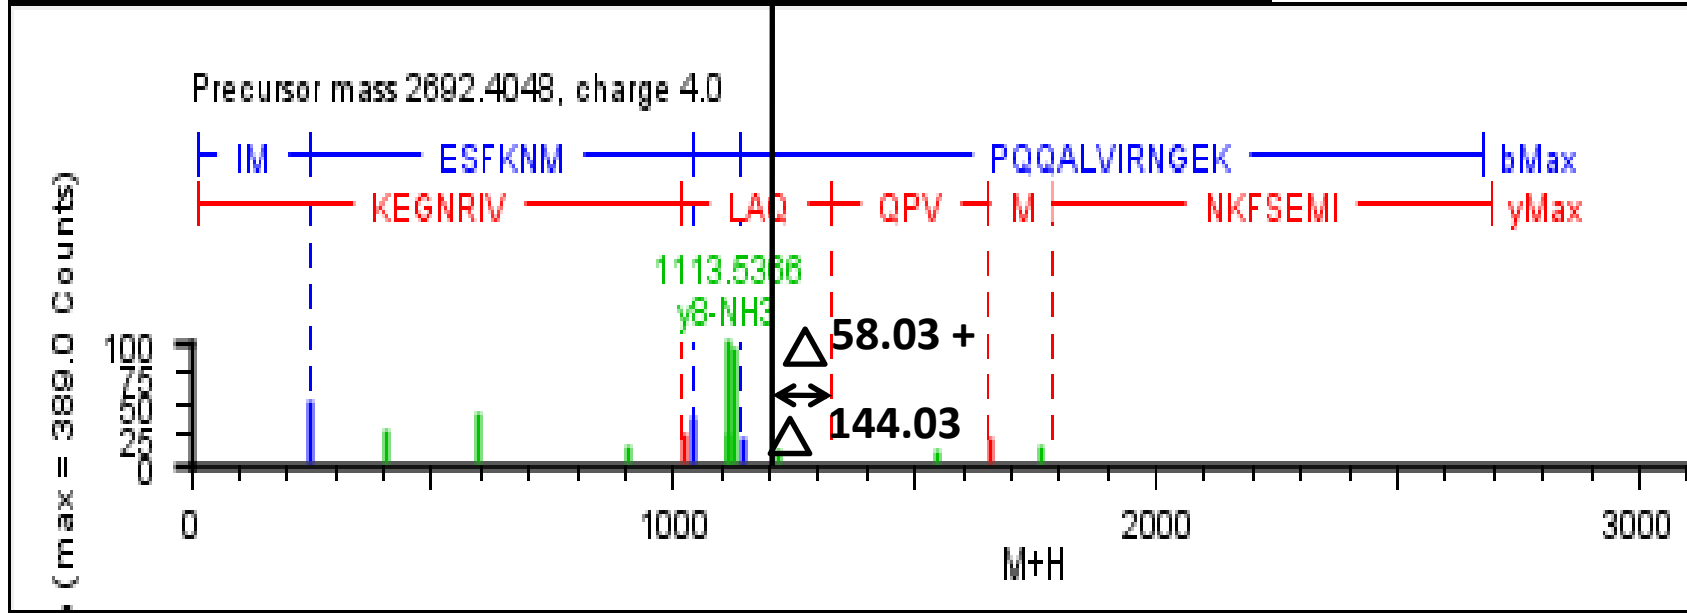

**1329.738:**  
**(1127.58+**  
**58.03+**  
**144.03)**

**163-177**

**(K)NMVPQQALVIR(Pento)NGEK(ImiA)(M)**

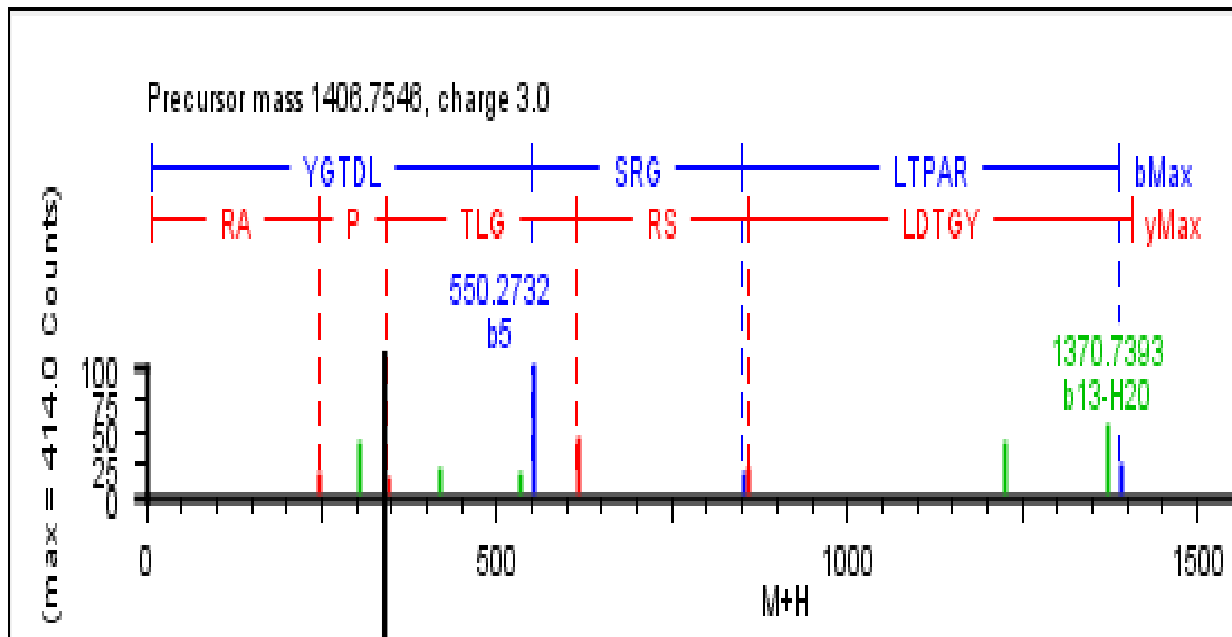

343.1896

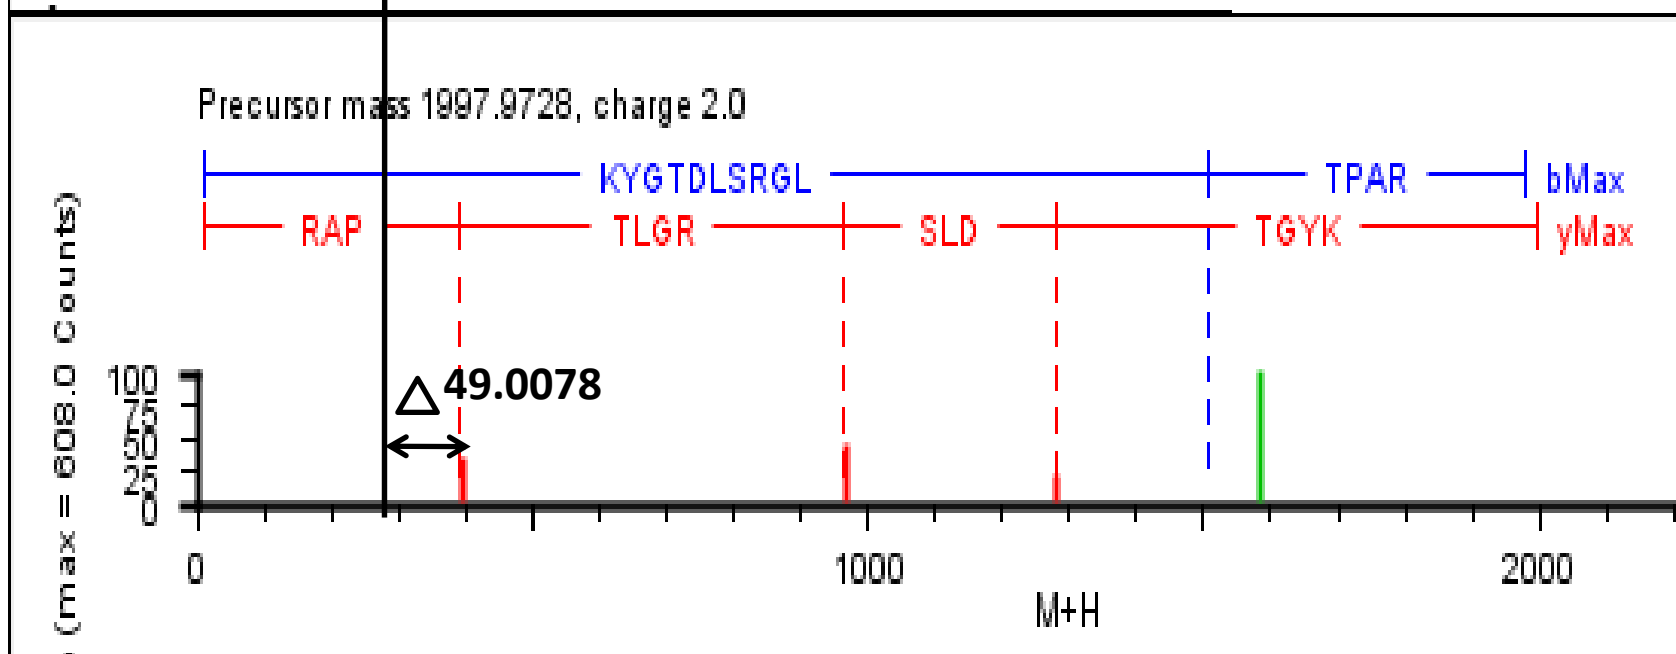

392.214:  
 (343.18+  
 49.00)

54-67

(R)KYGTDLSRGLTPAR(MOLD)(A)

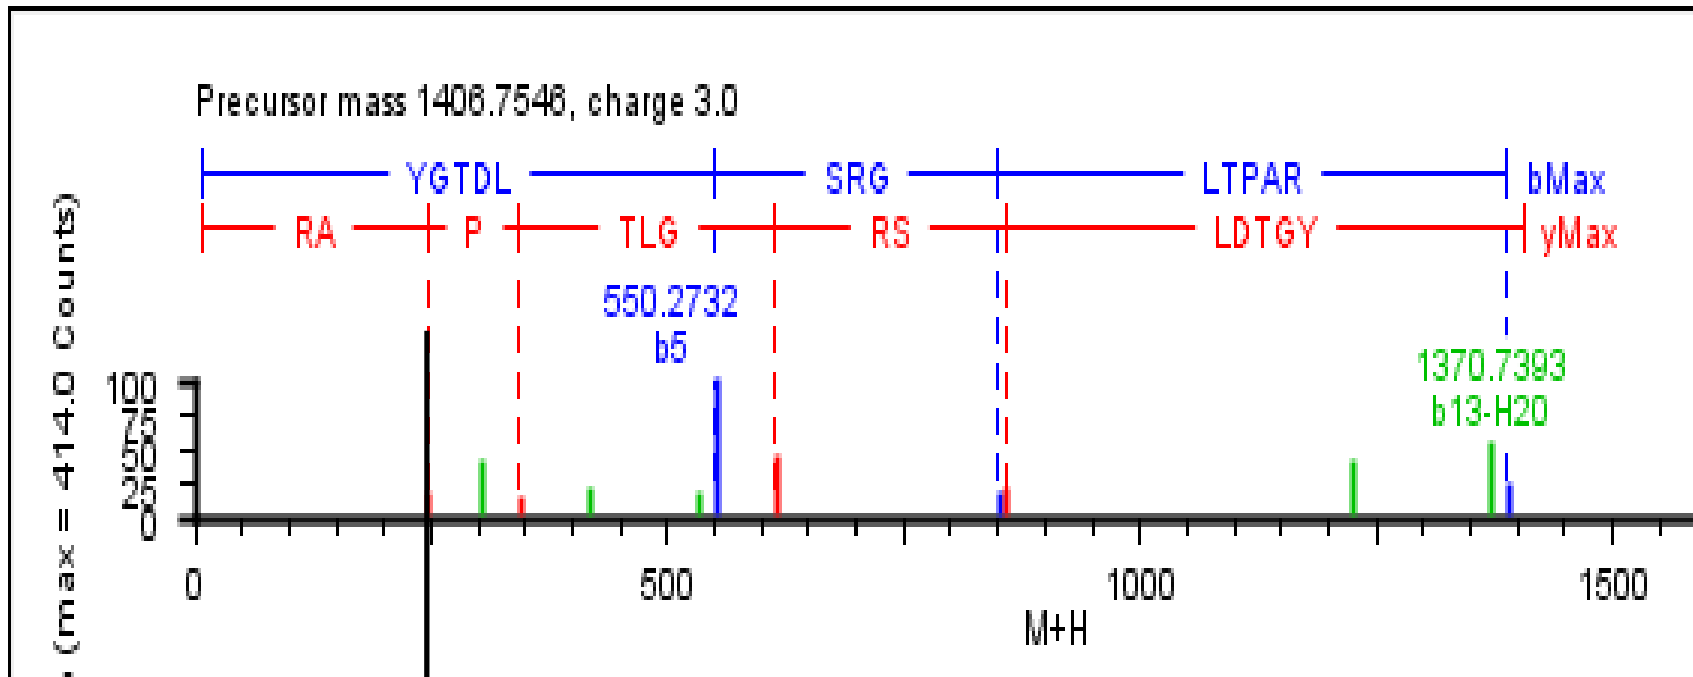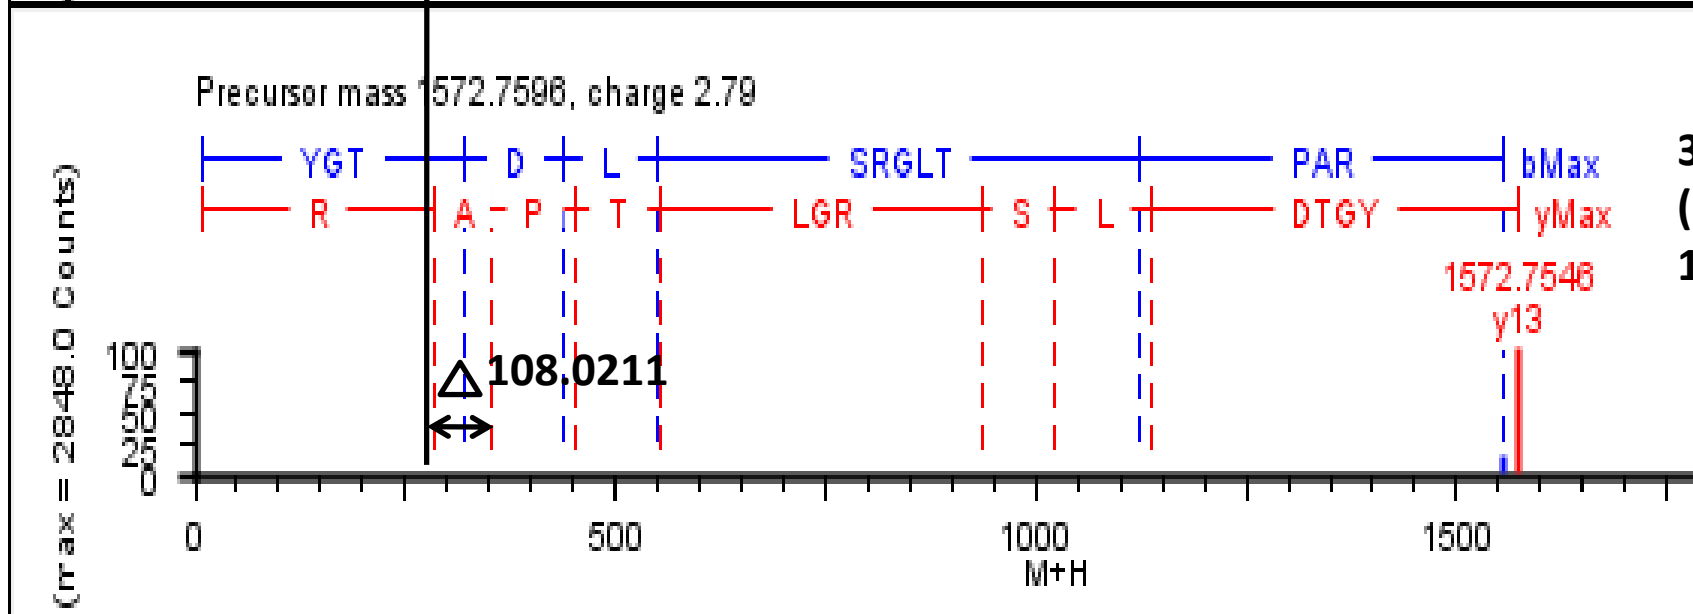

55-67

(K)YGTDLSRGLTPAR(Pyr)(A)

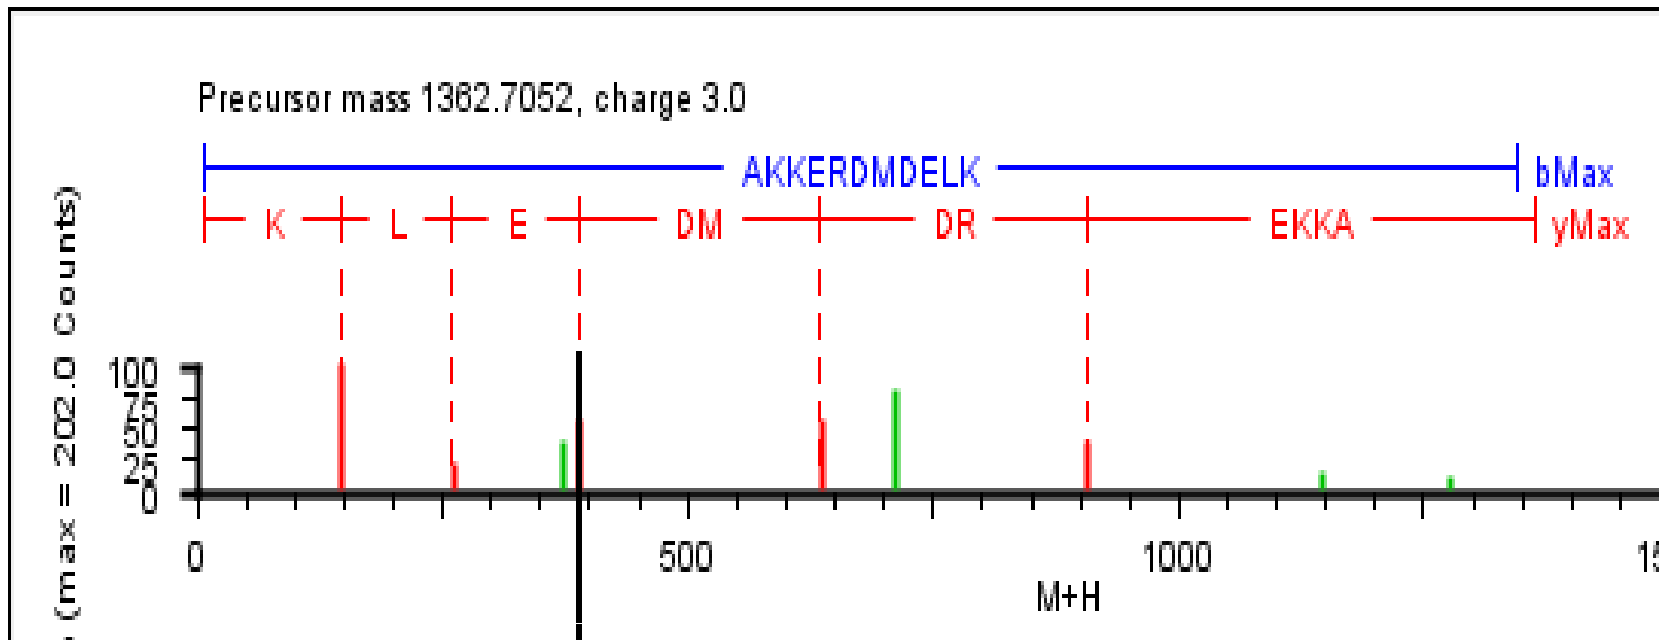

389.202

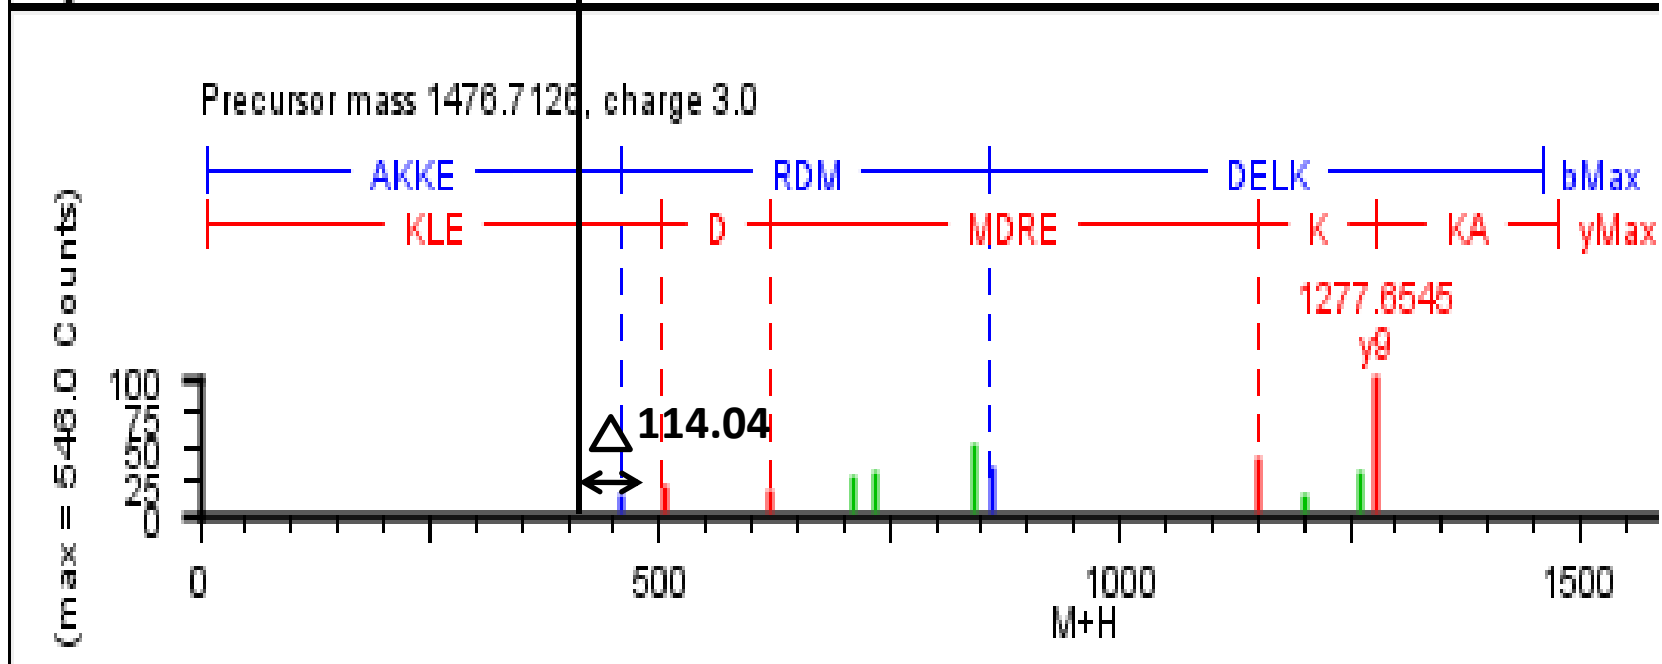

503.2875:  
(389.20+  
114.04)

26-36

(K)AKKERDMDDELK(Ubi)(K)



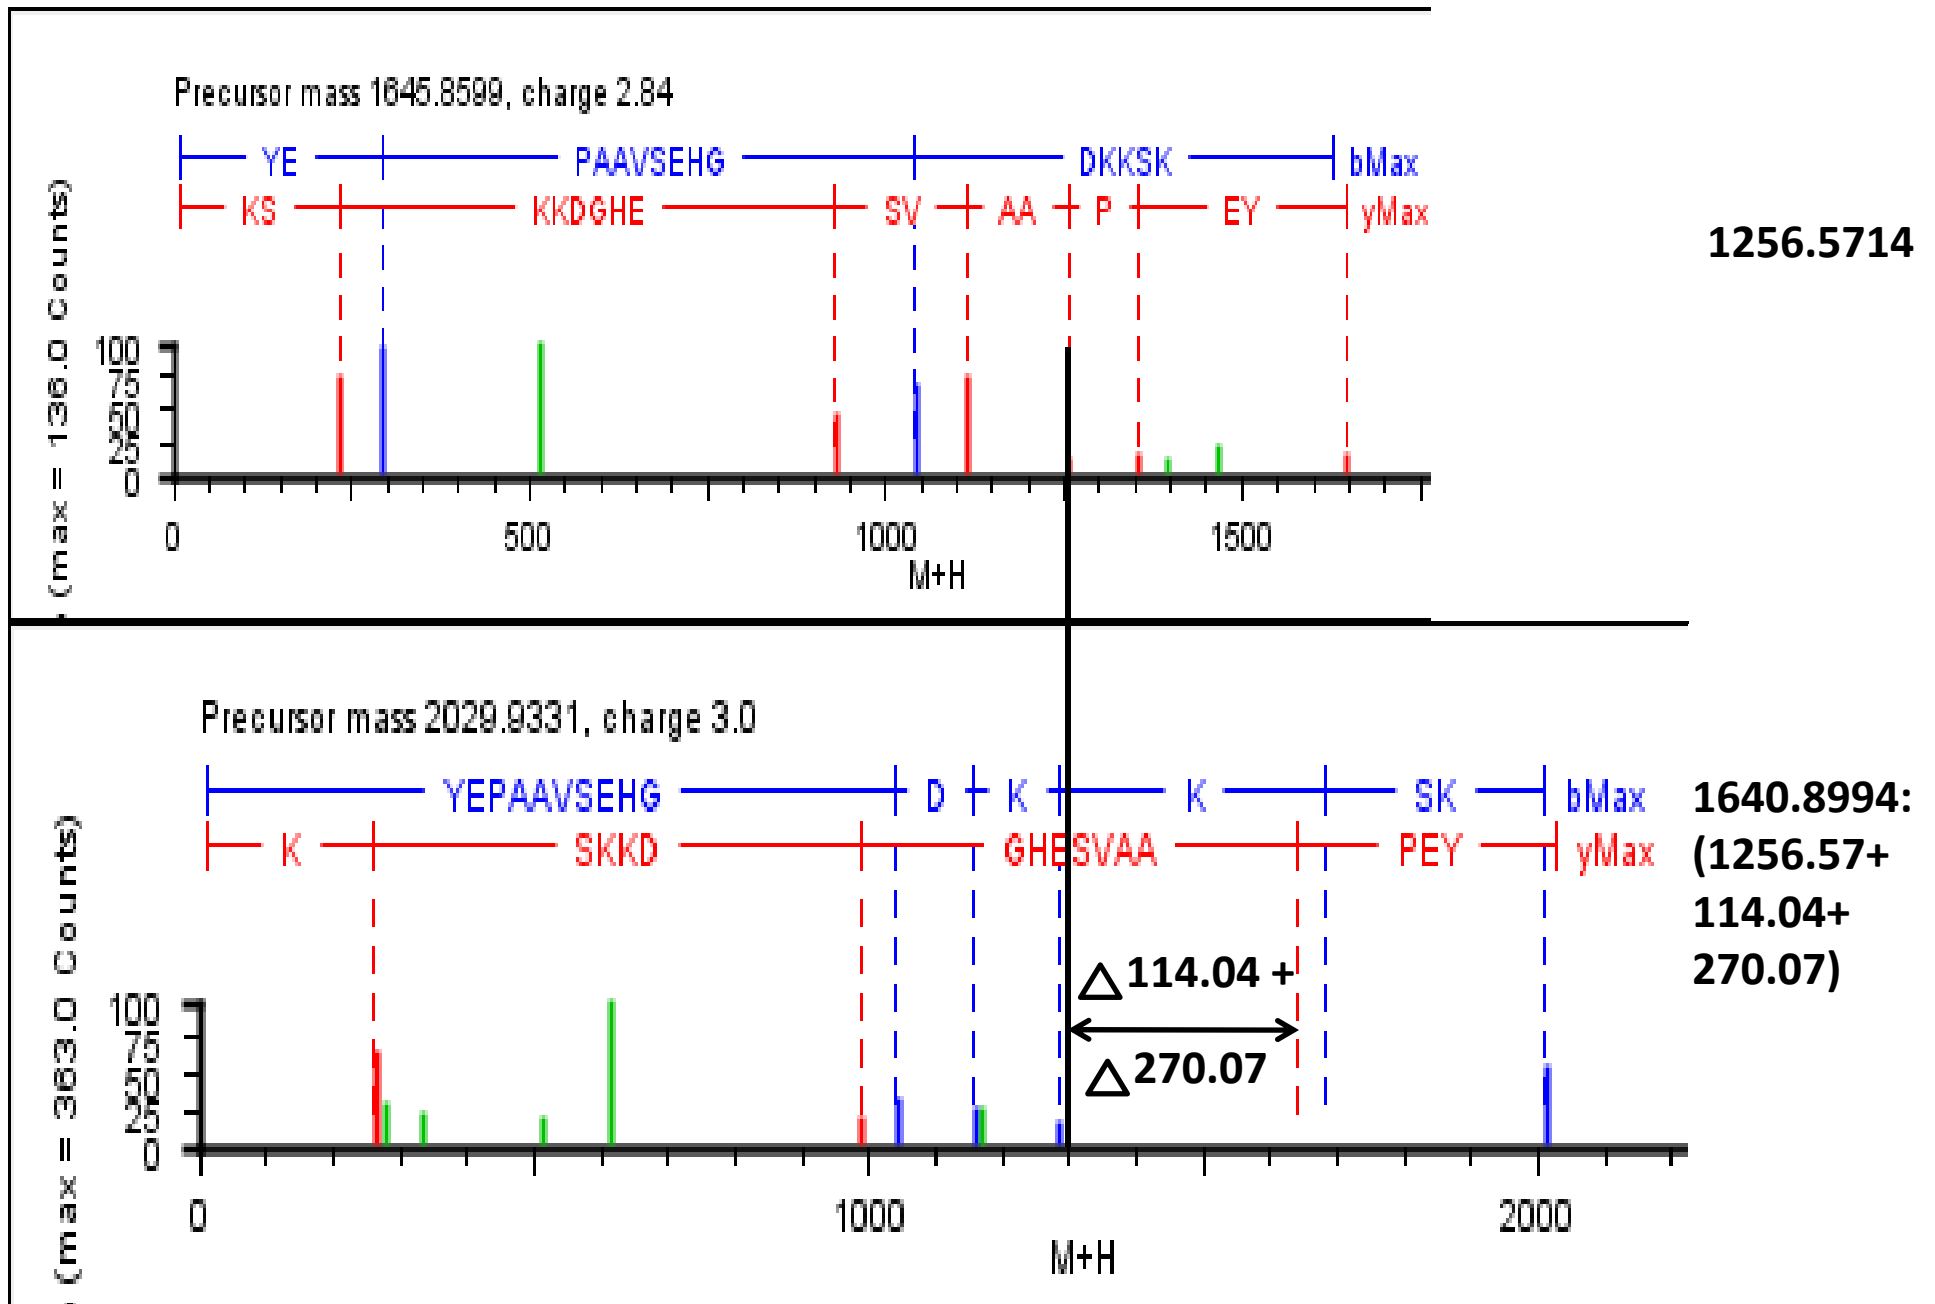

10-24

(K)YEPAAVSEHGDKK(AFGP)SK(Ubi)(K)

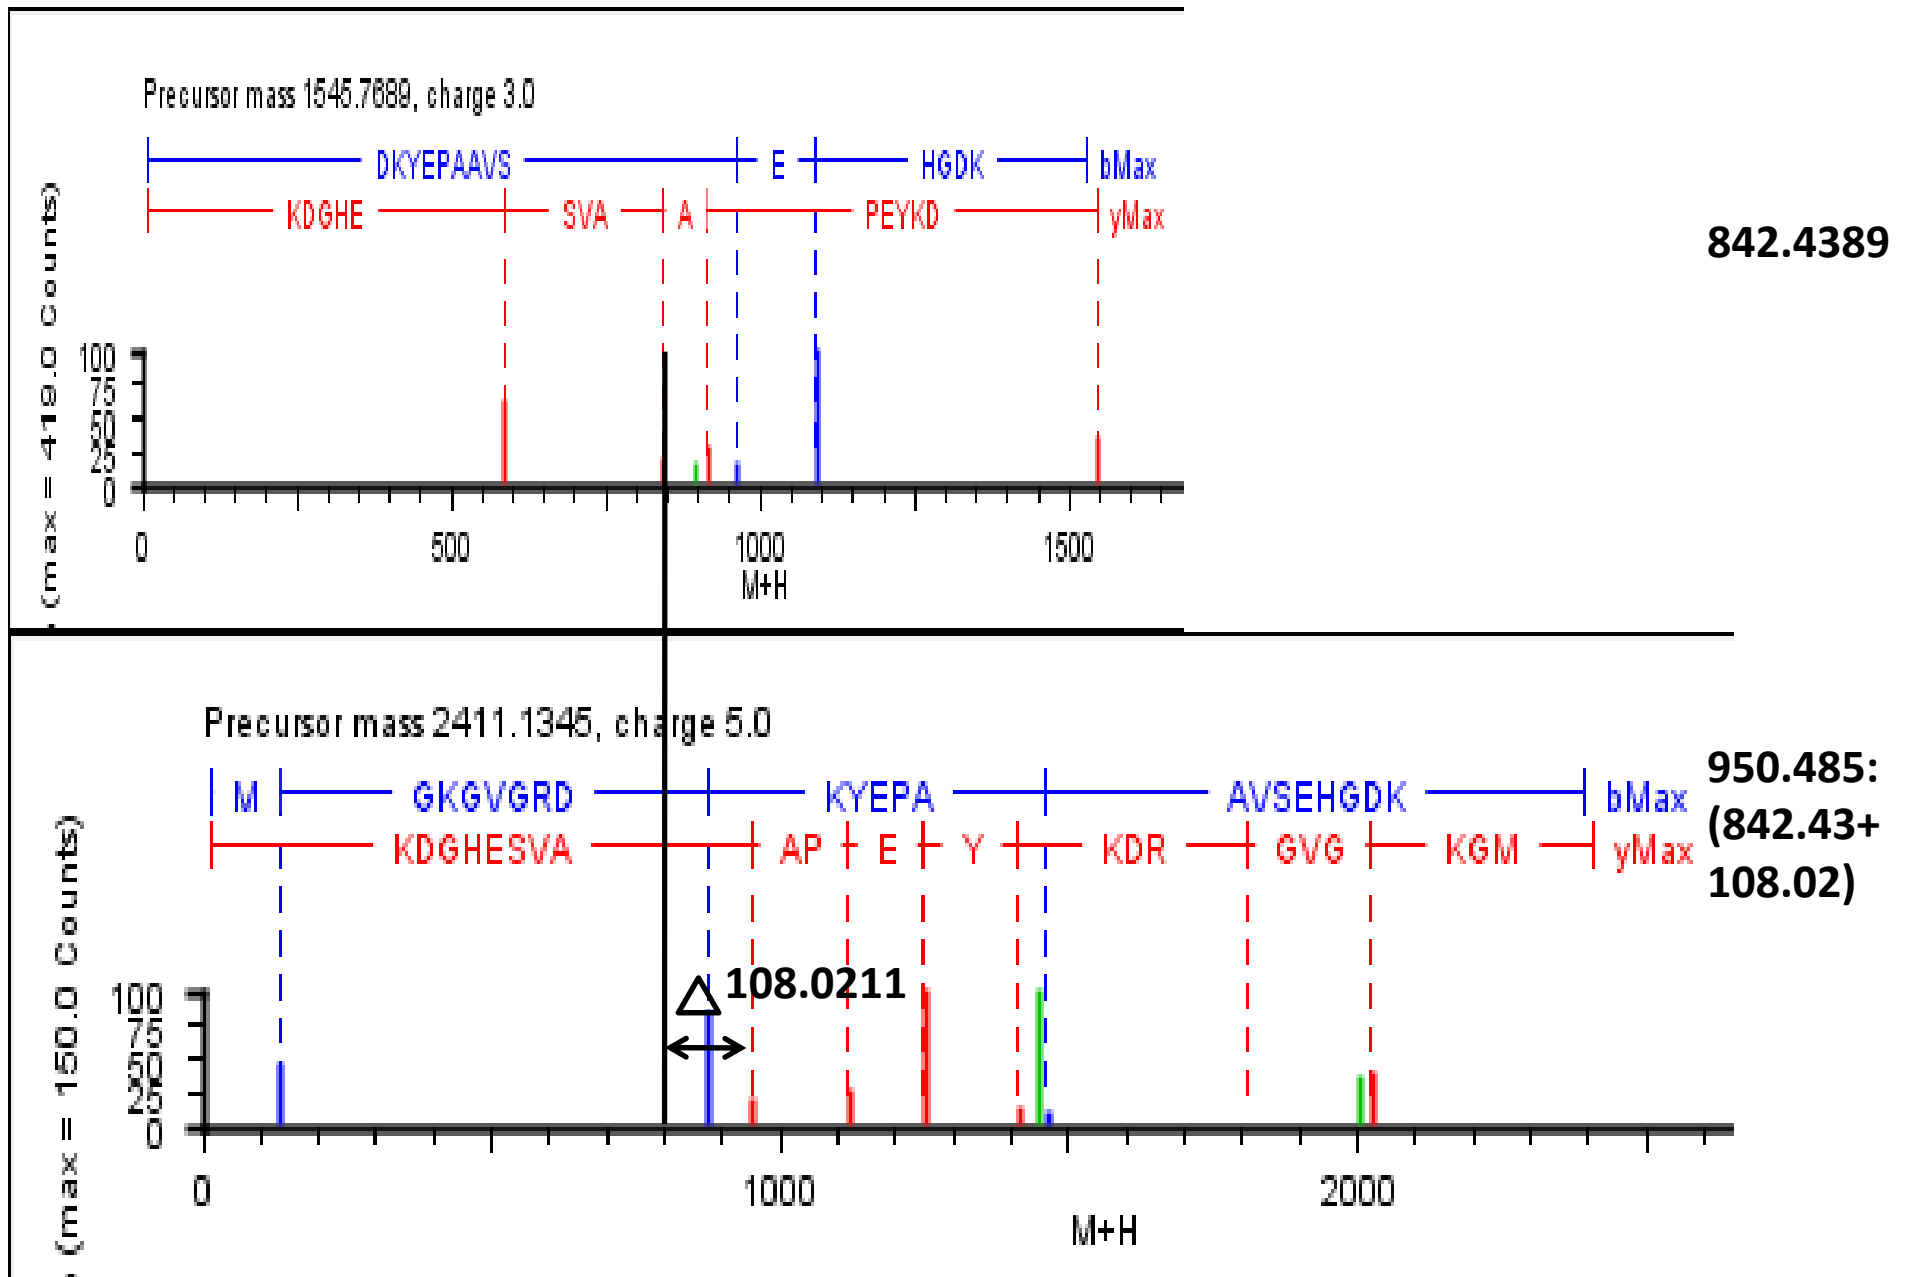

1-21

(-)MGKGVGRDKYEPAAVSEHGDK(Pyr)(K)

GDH

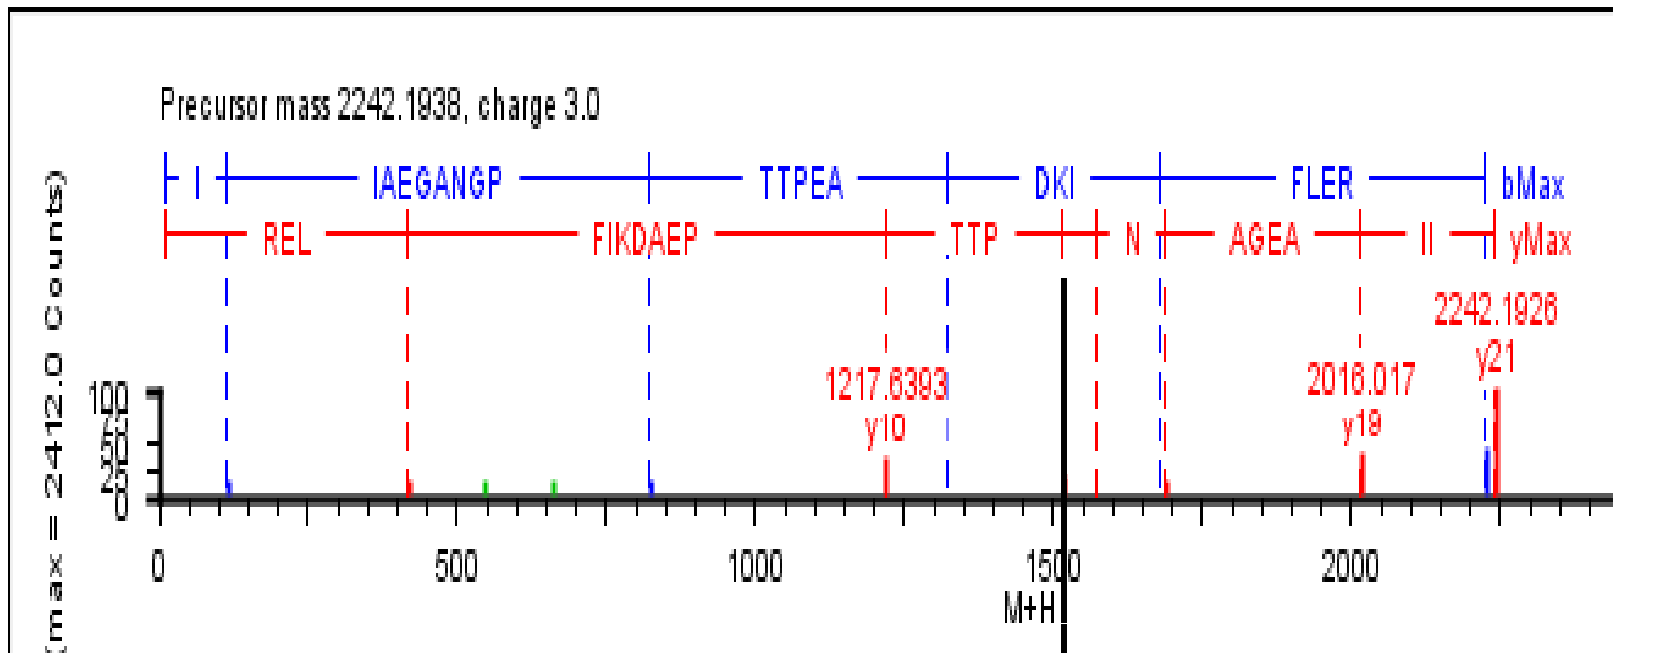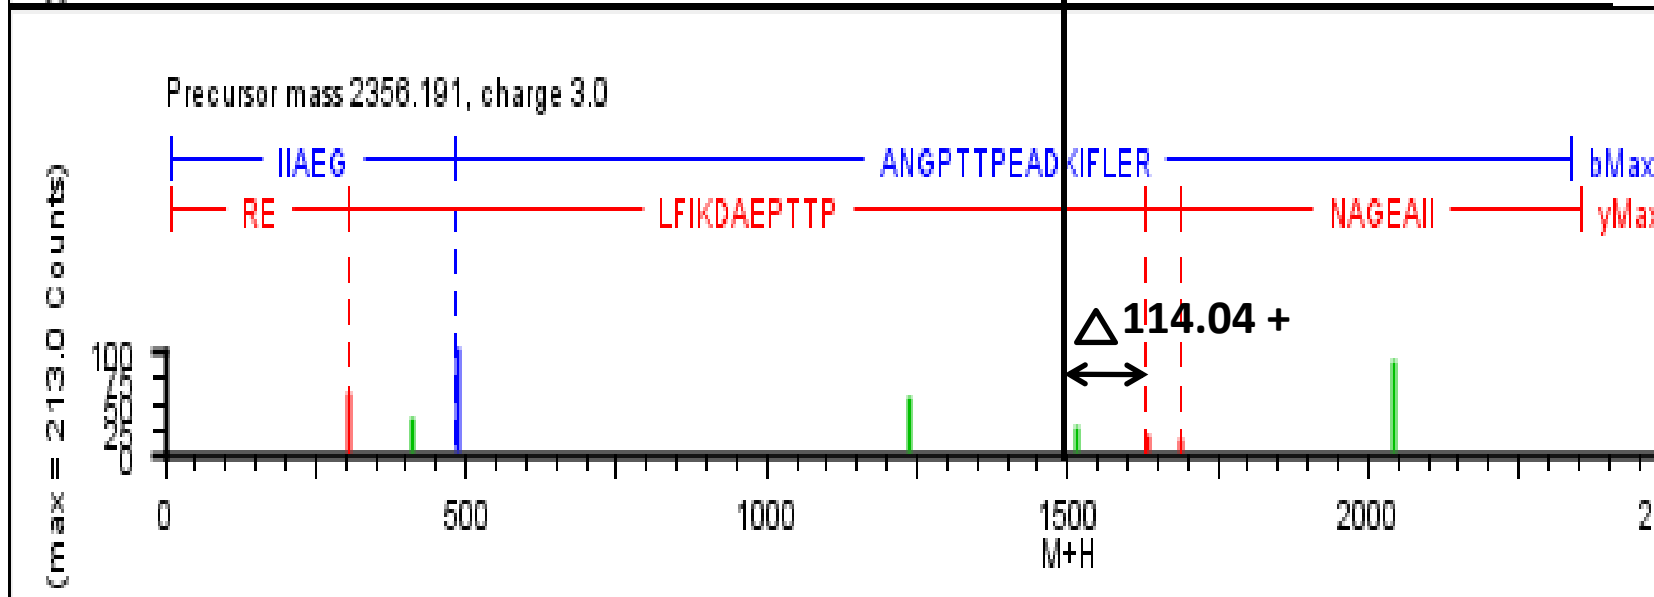

400-420

(K)IIAEGANGPTTPEADK(Ubi)IFLER(N)

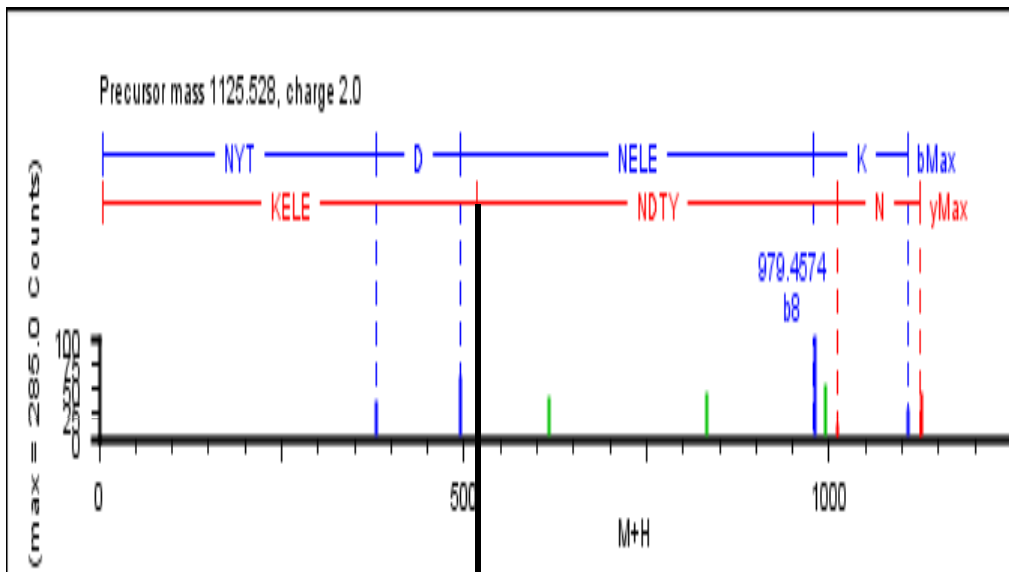

518.2836

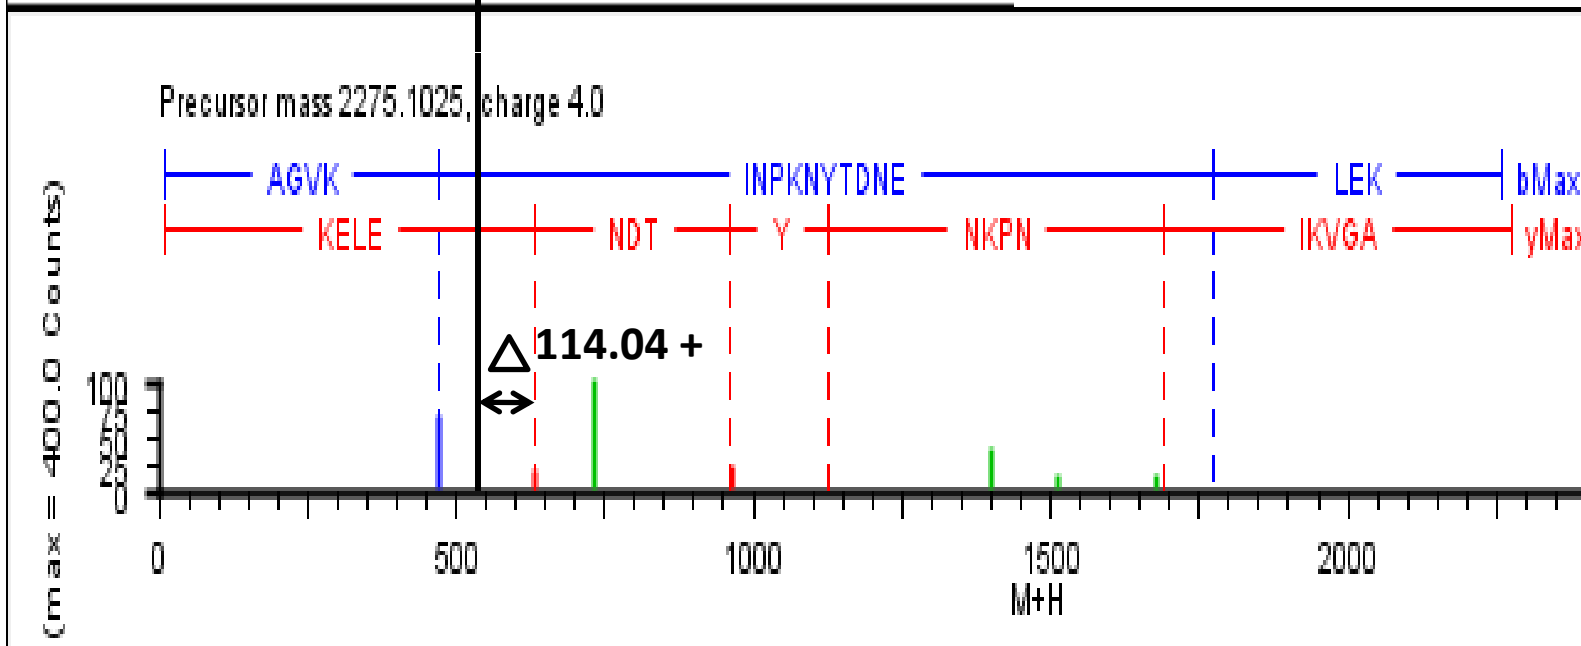

632.3735:  
(518.28+  
114.04)

184-200

(K)AGVKINPKNYTDNELEK(Ubi)(I)

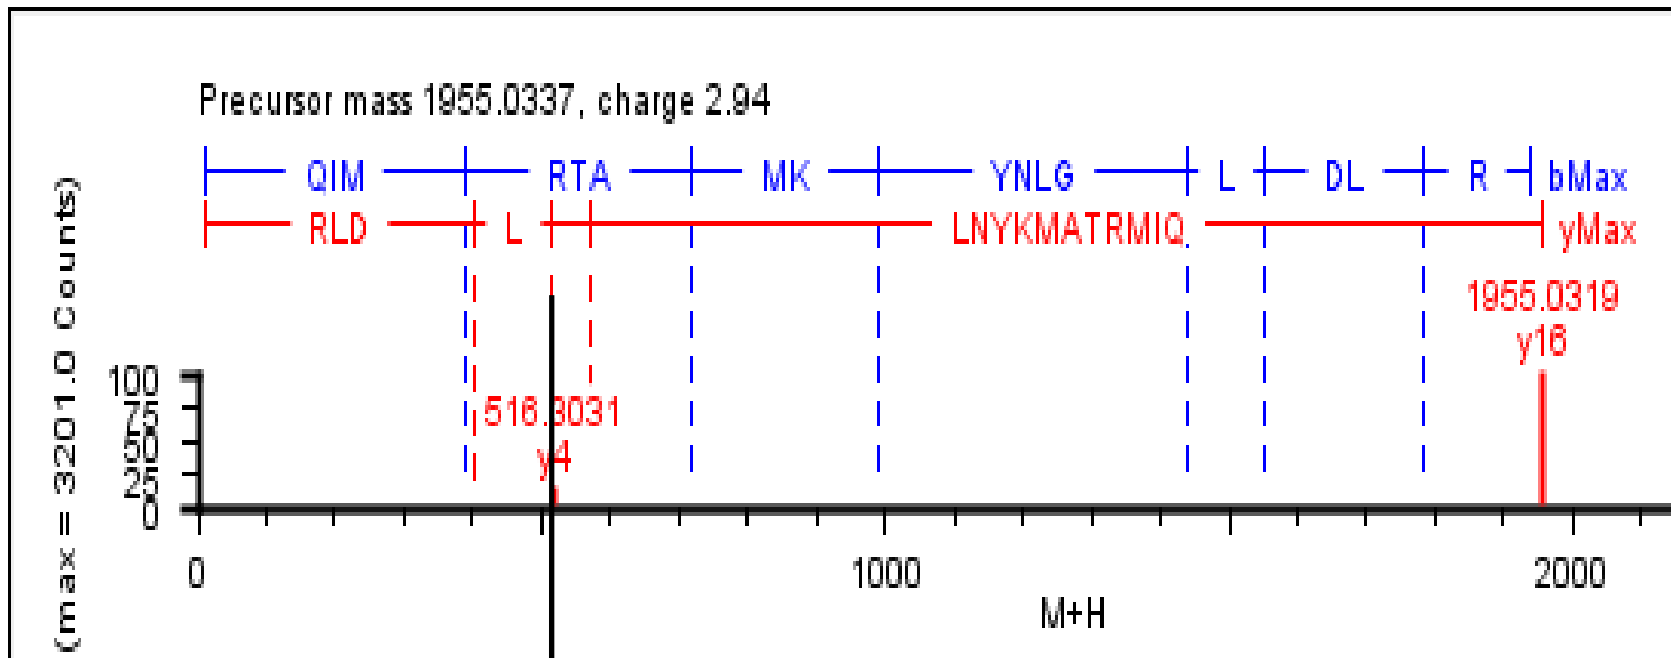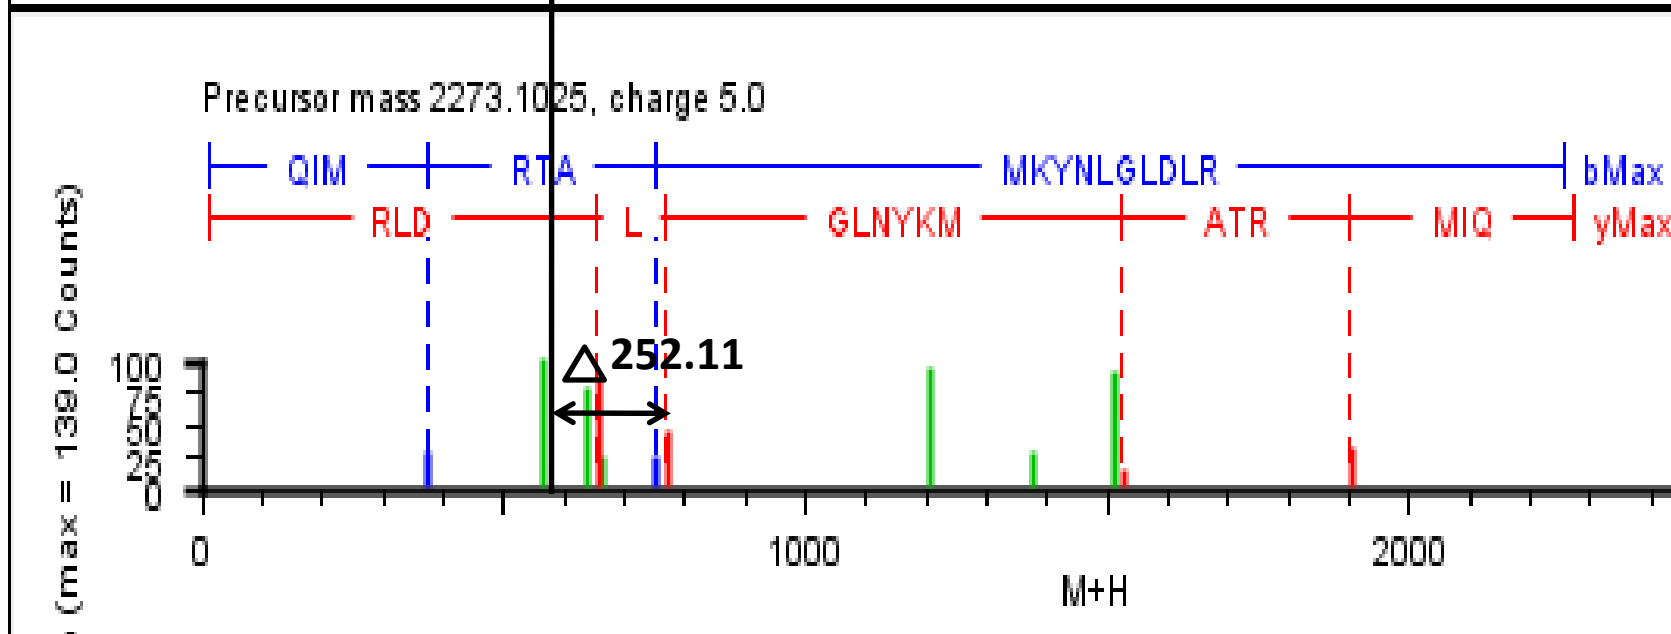

520-535

(R)QIMRTAMKYNLGLDLR(Crossline)(T)

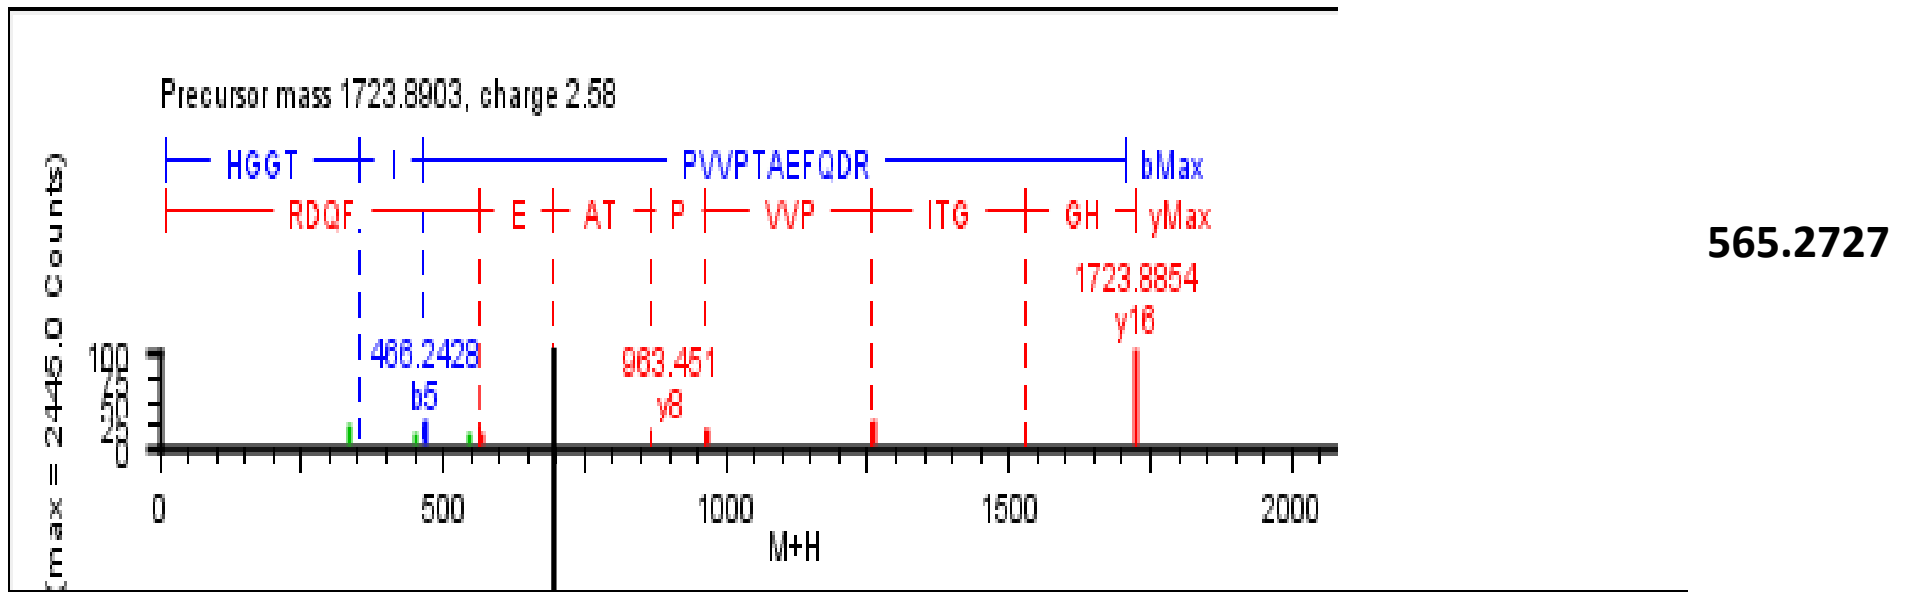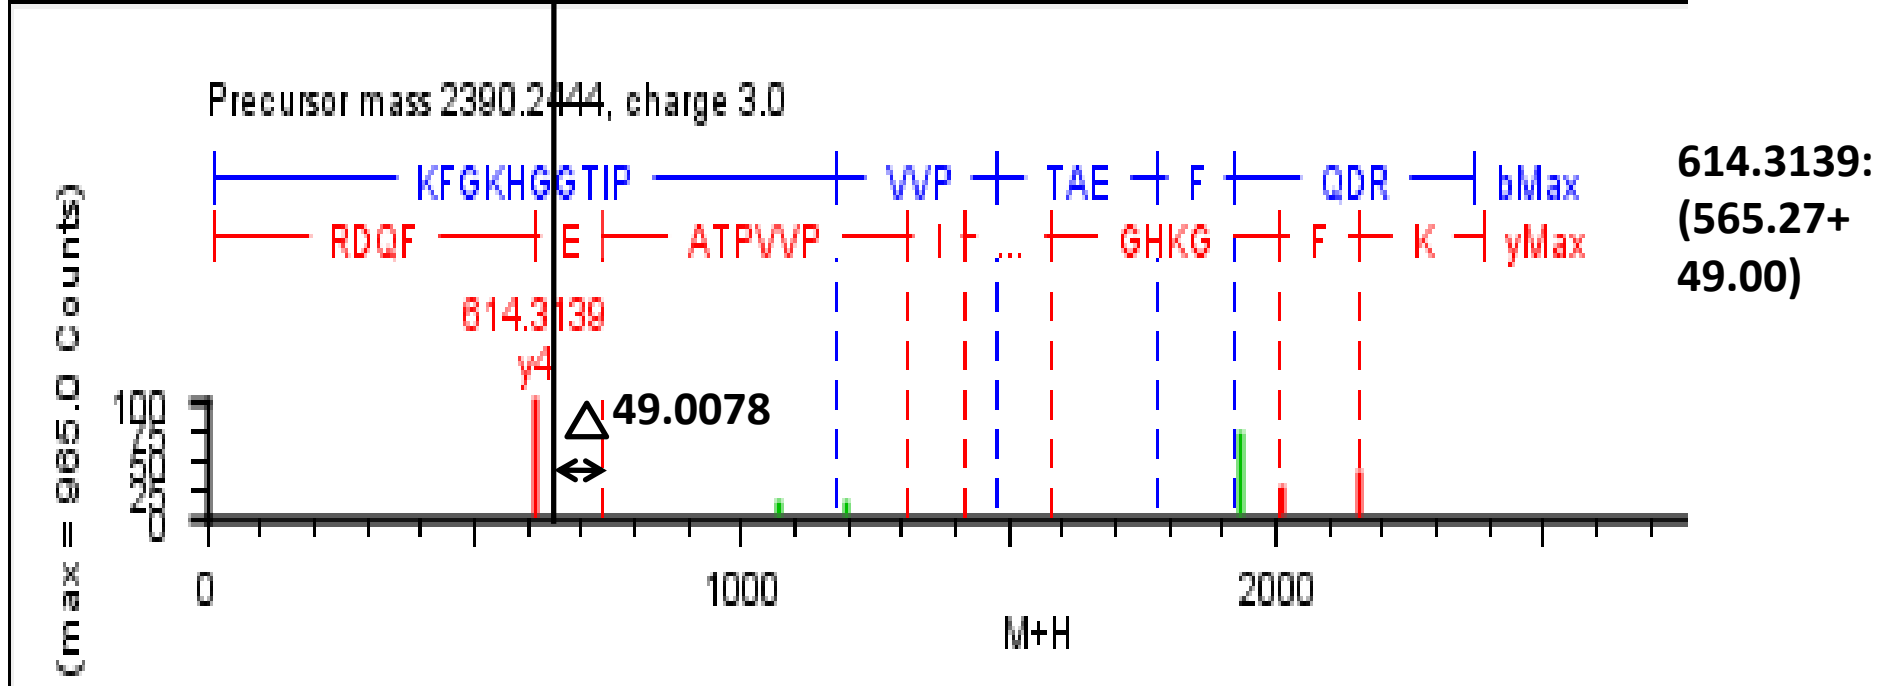

477-496

(R)KFGKHGGTIPVWPTAEFQDR(MOLD)(I)

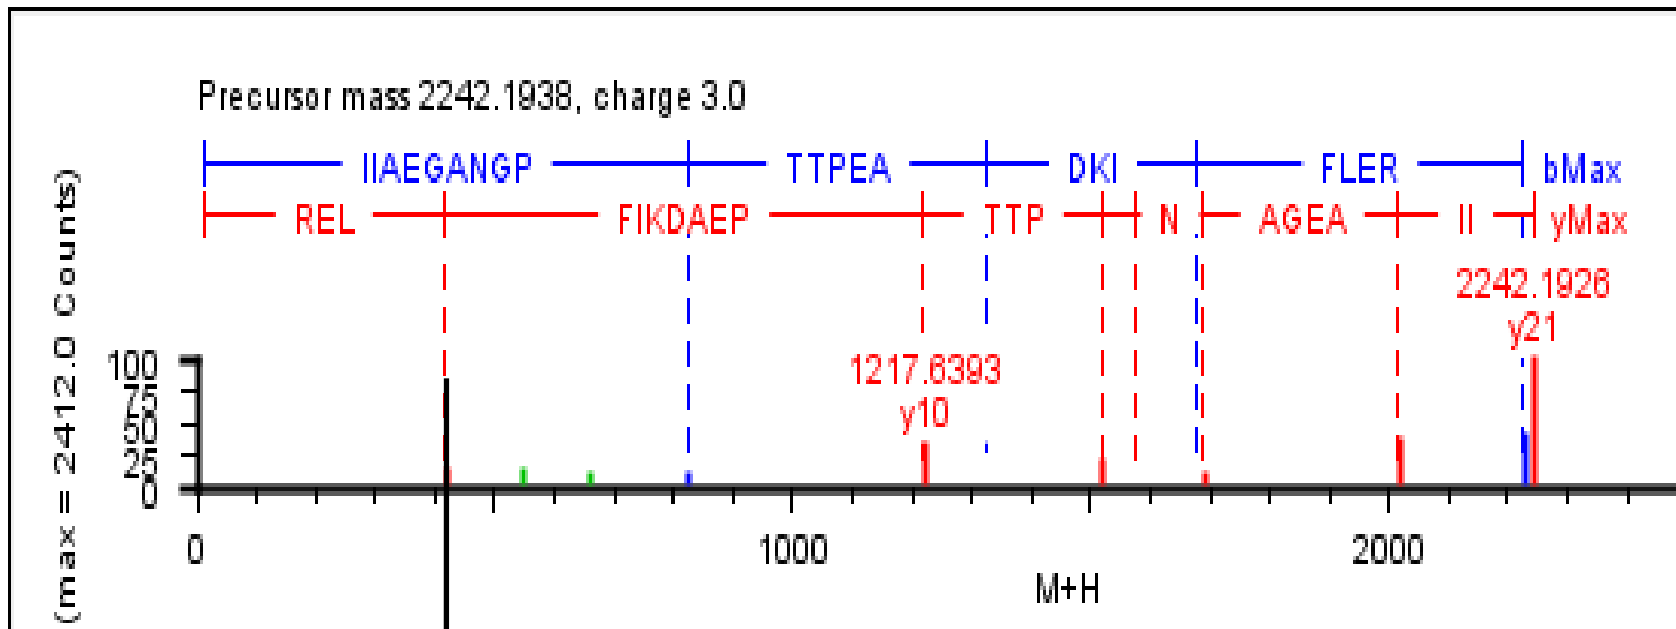

417.234

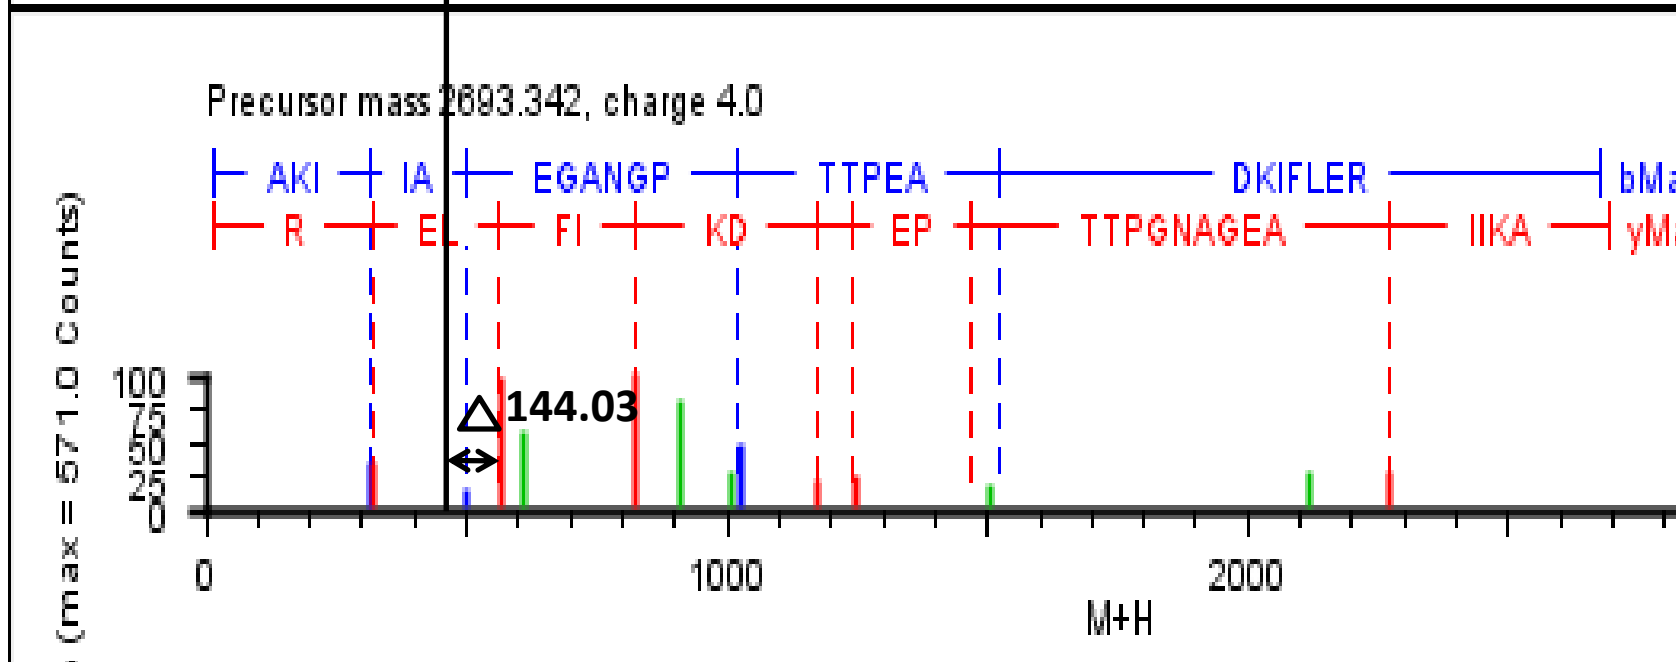

561.2697:  
(417.23+  
144.03)

400-420

(K)IIAEGANGPTTPEADKIFLER(ImiA)(N)



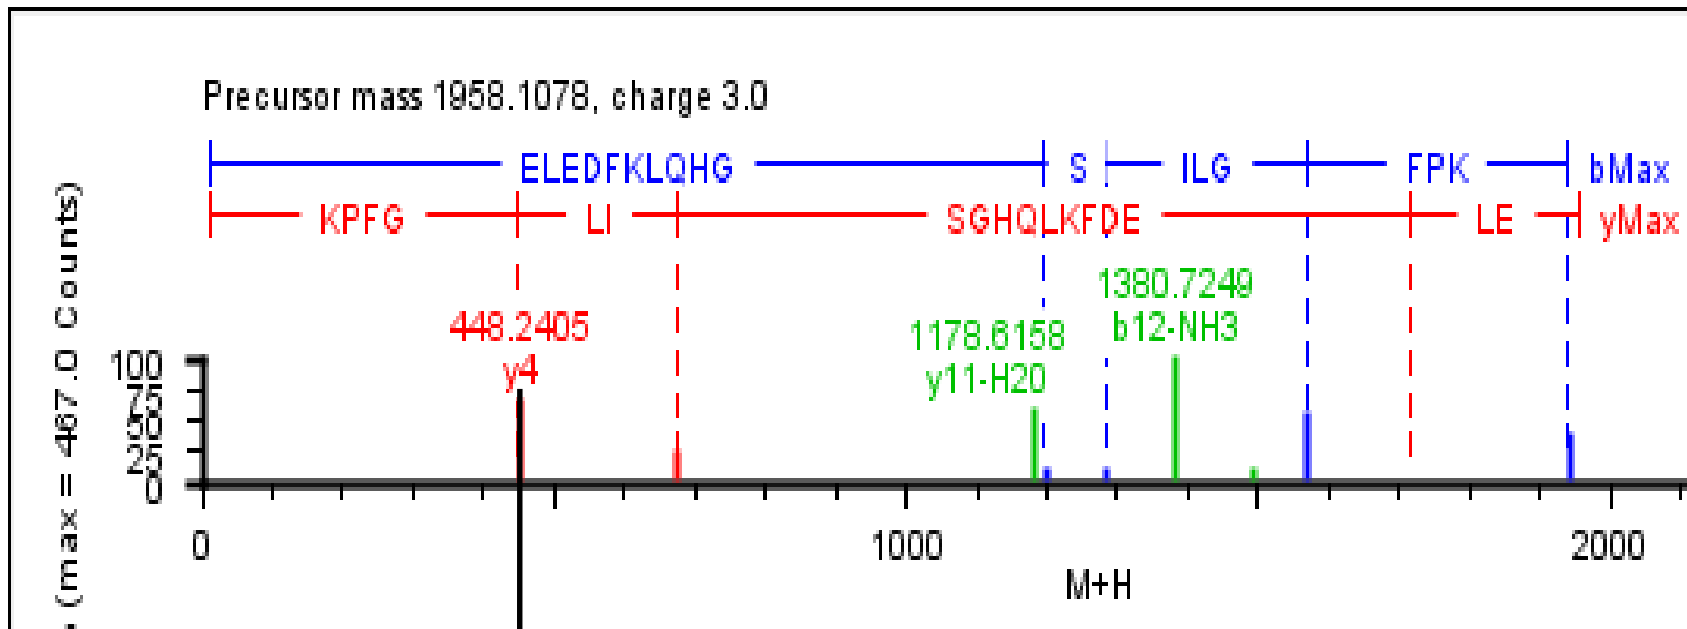

448.2405

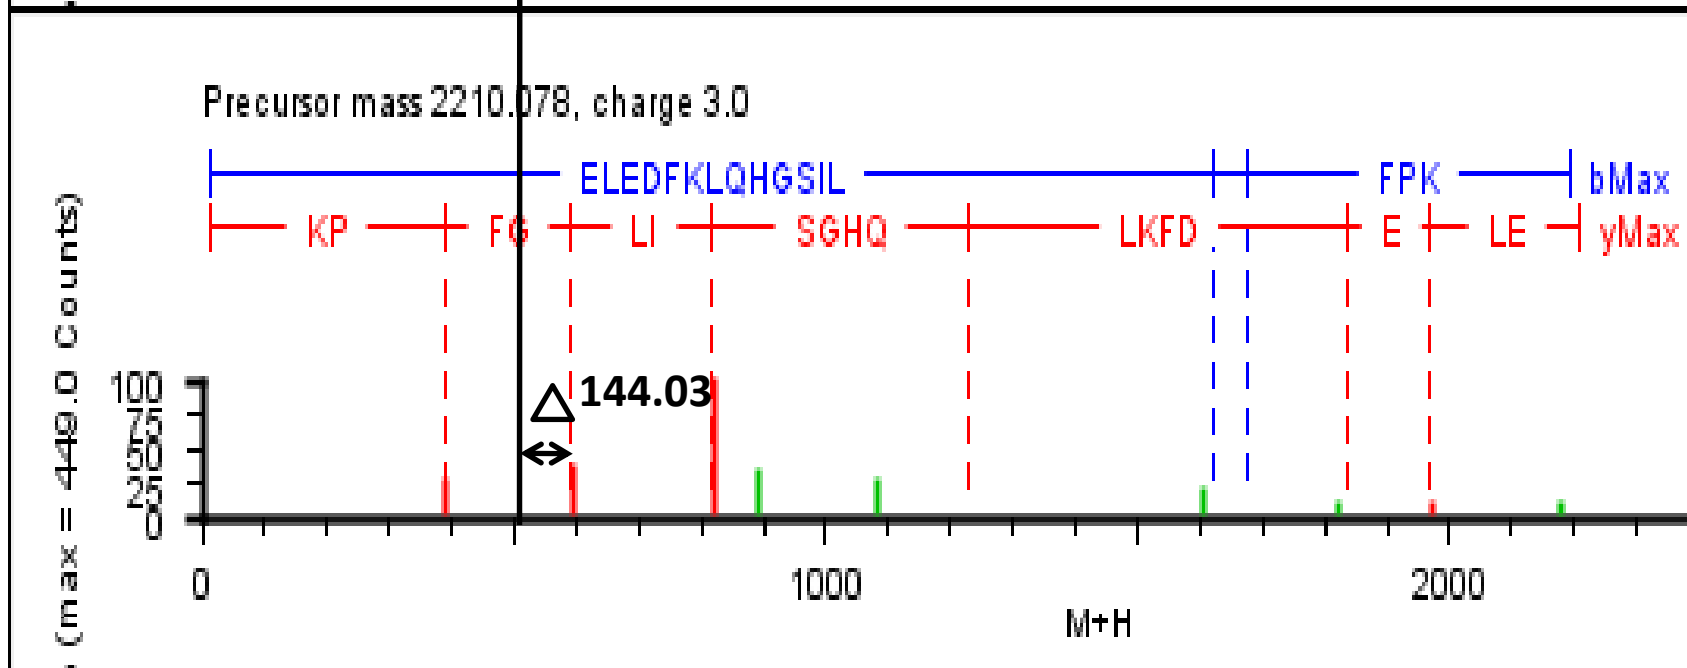

592.2623:  
(448.24+  
144.03)

(K)ELEDFKLQHGSILGFPK(ImiA)(A)

347-363

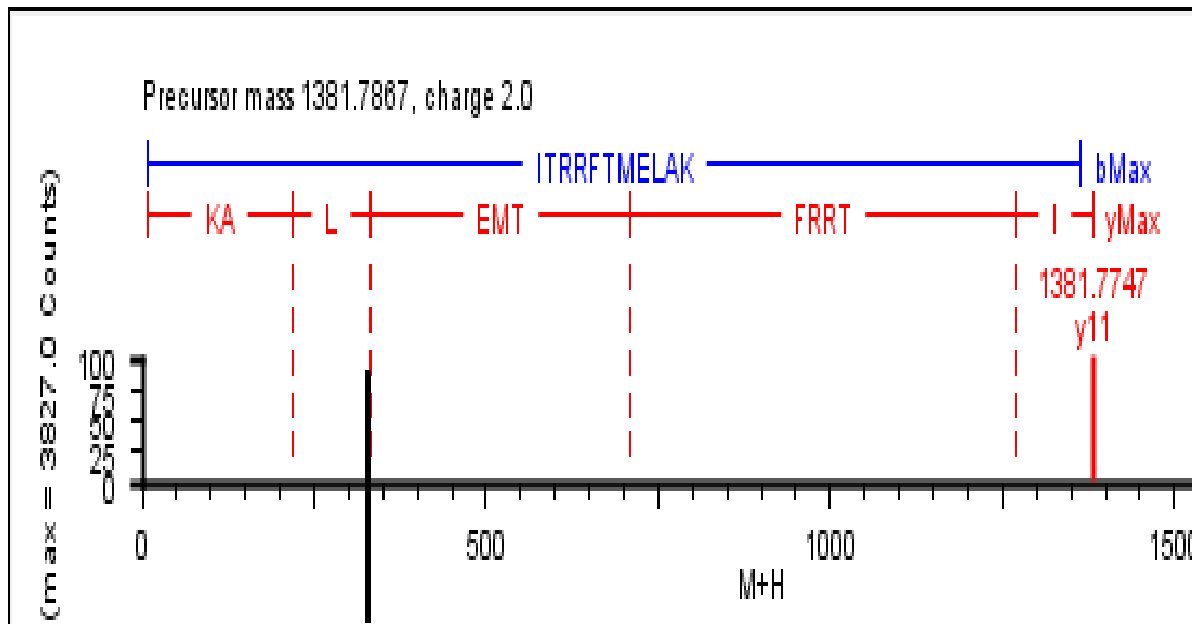

331.2295

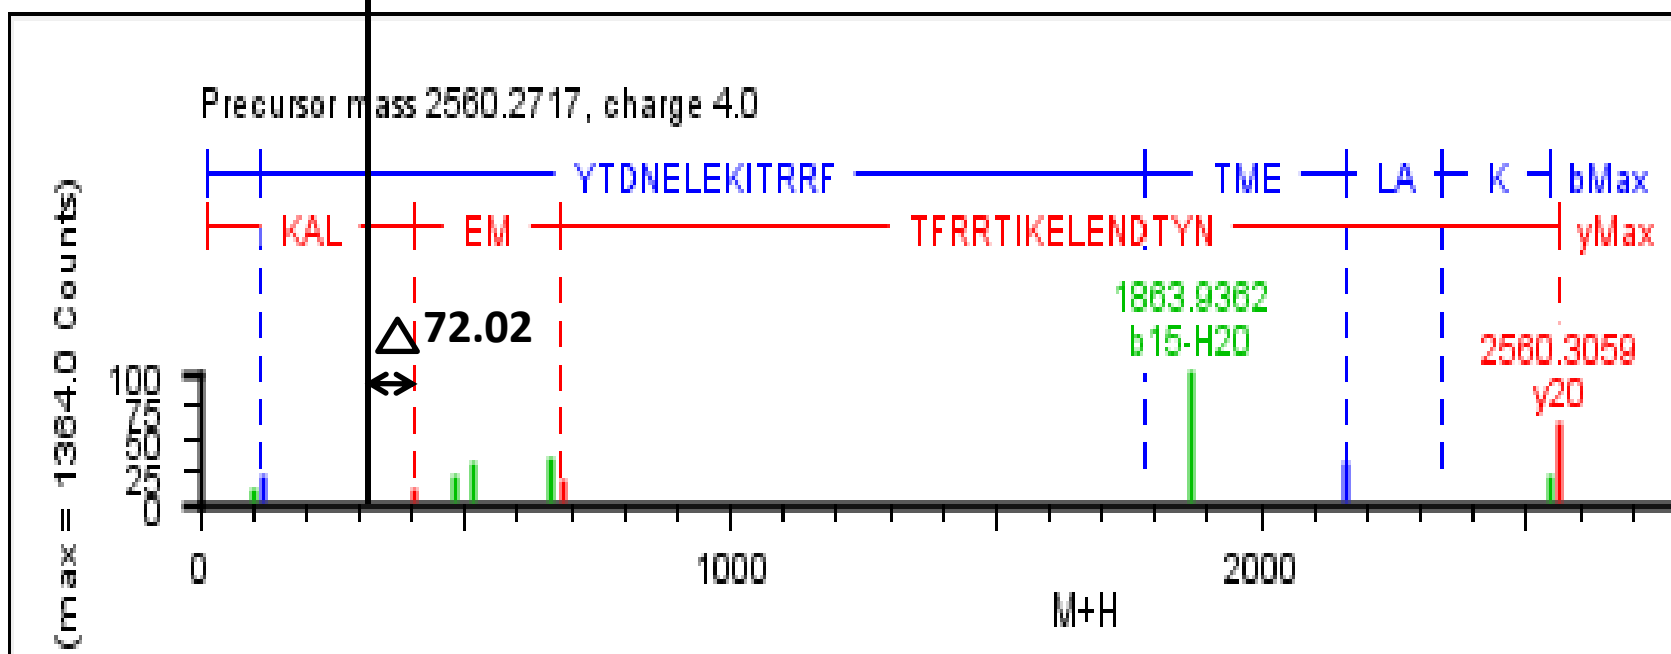

403.2362

192-211

(K)NYTDNELEKITRRFTMELAK(CEL)(K)

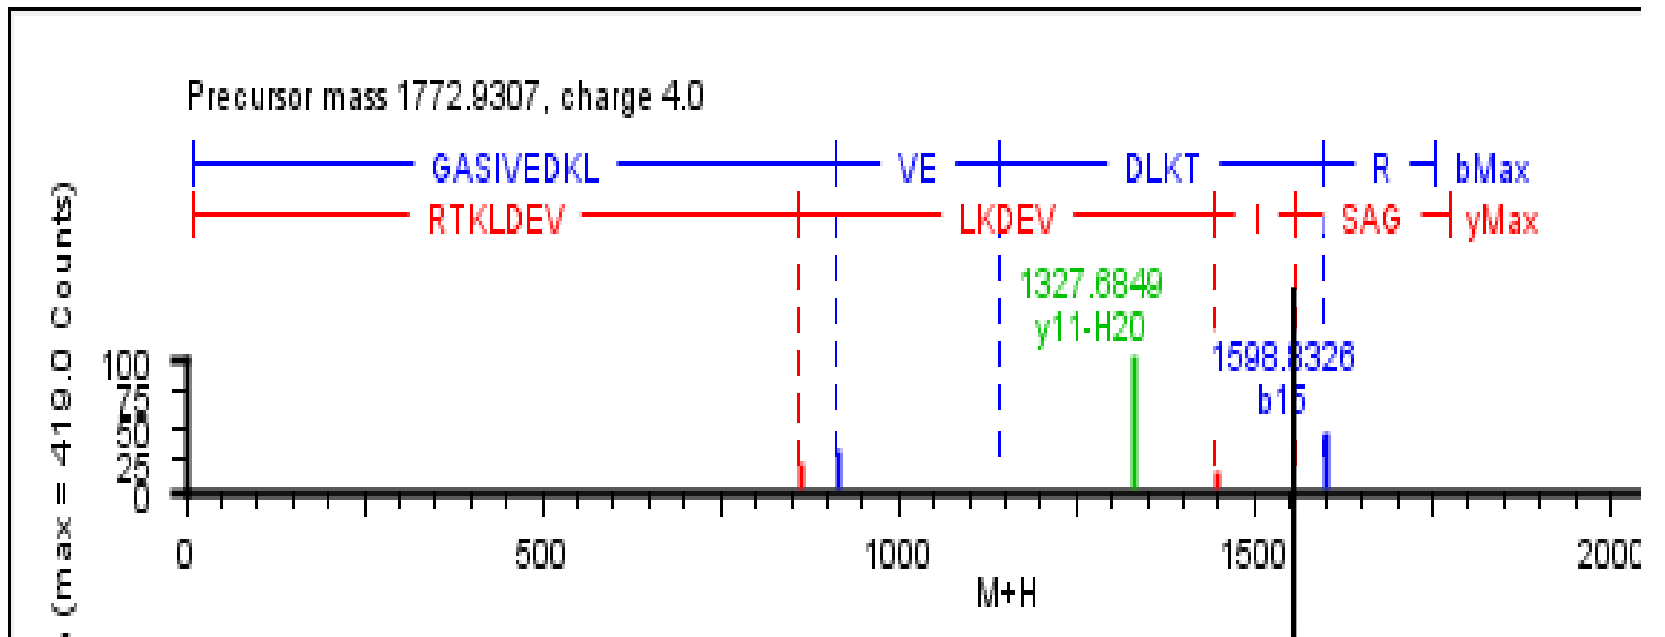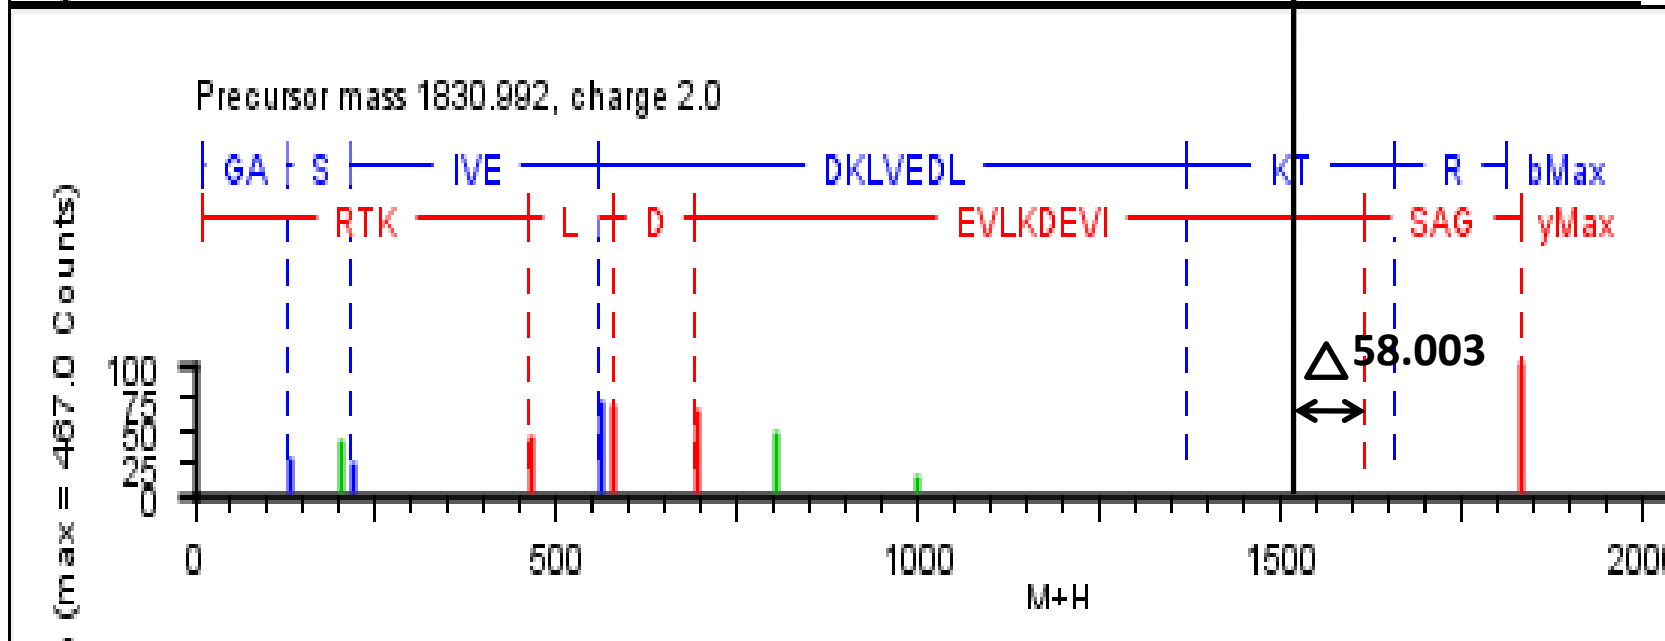

77-92

(R)GASIVEDKLVEDLK(CML)TR(E)

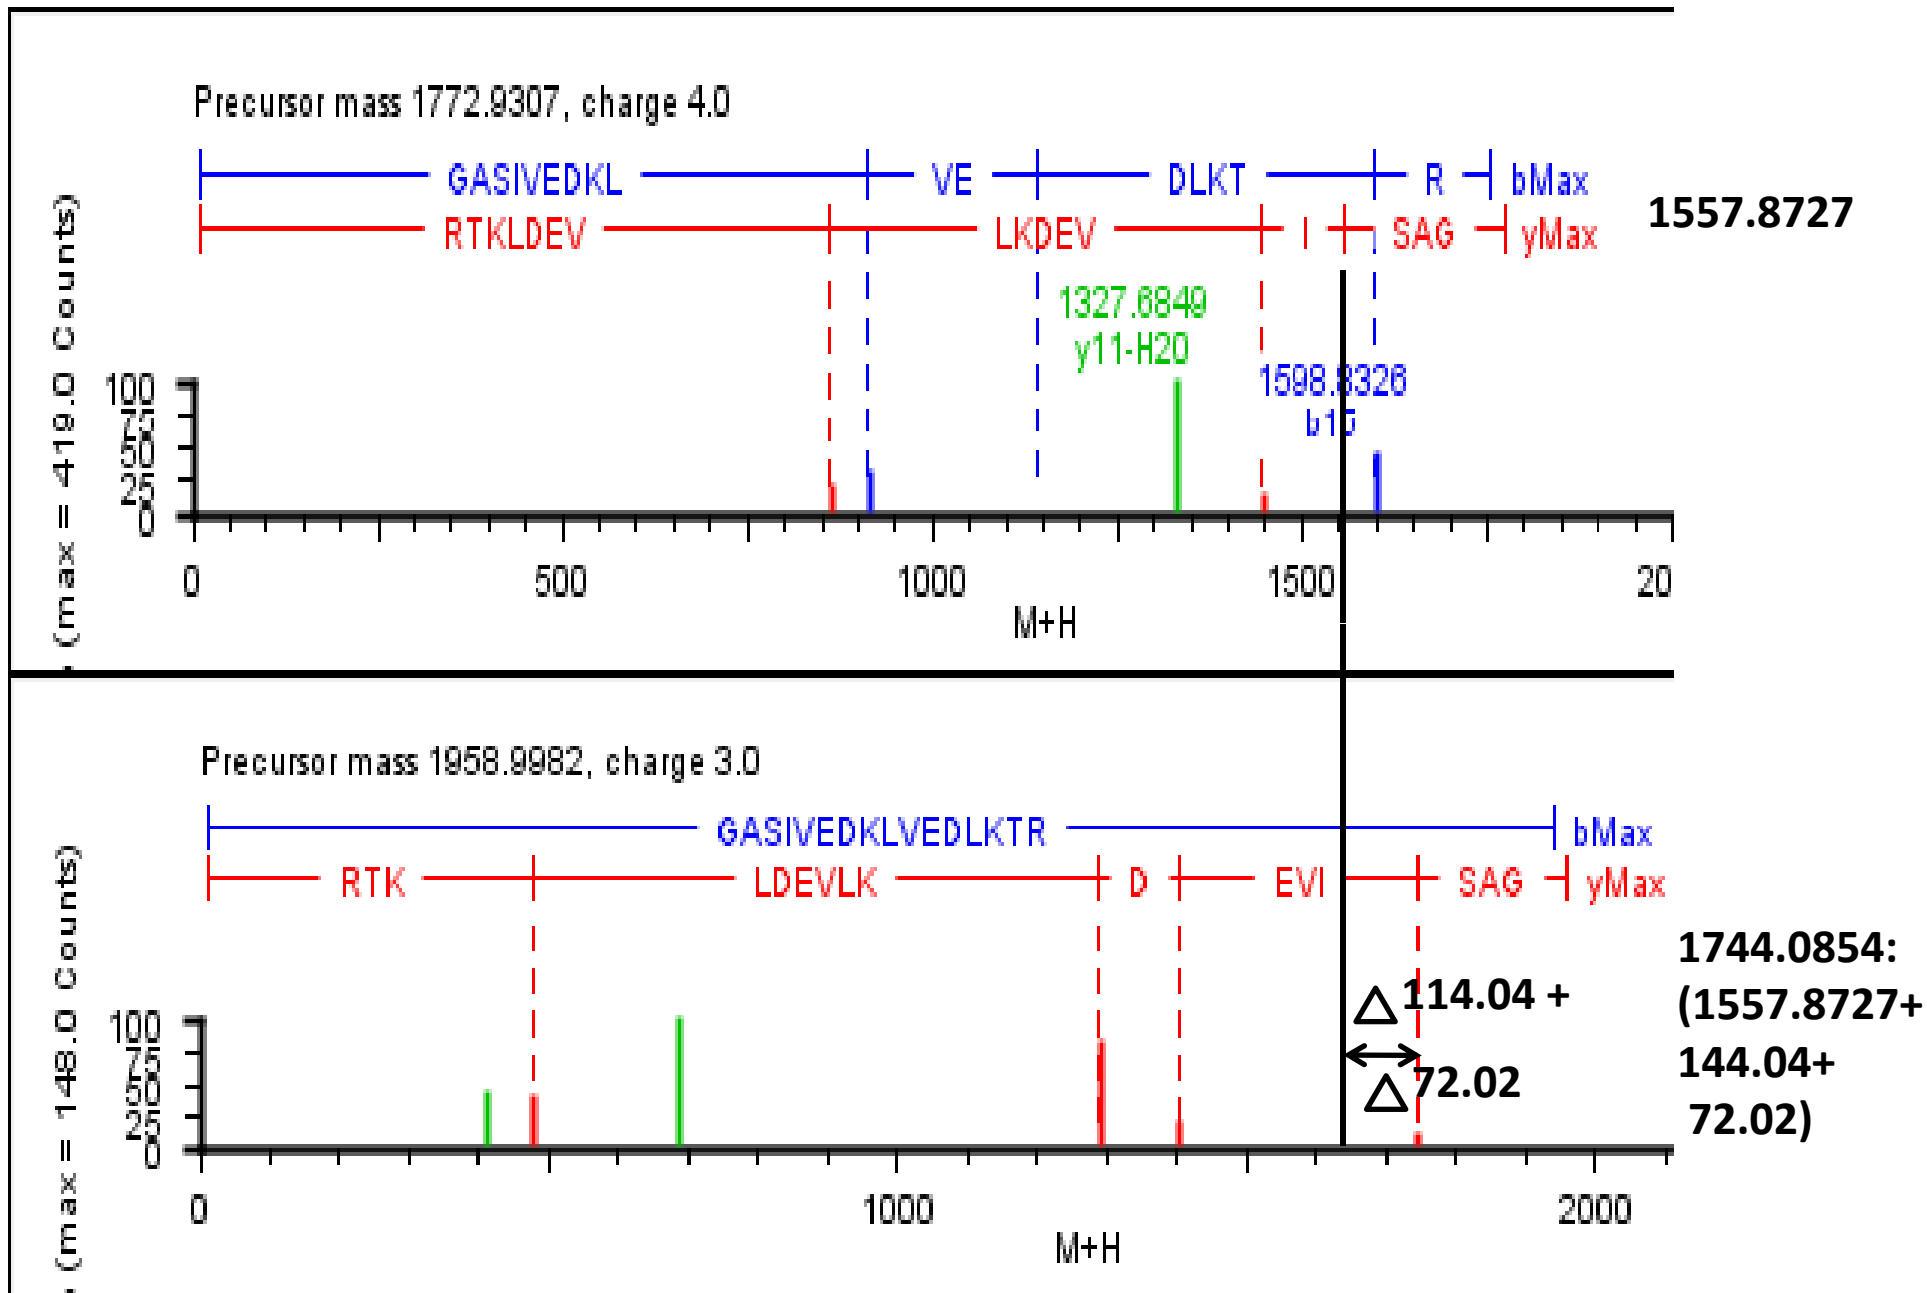

77-92

(R)GASIVEDK(Ubi)LVEDLK(CEL)TR(E)

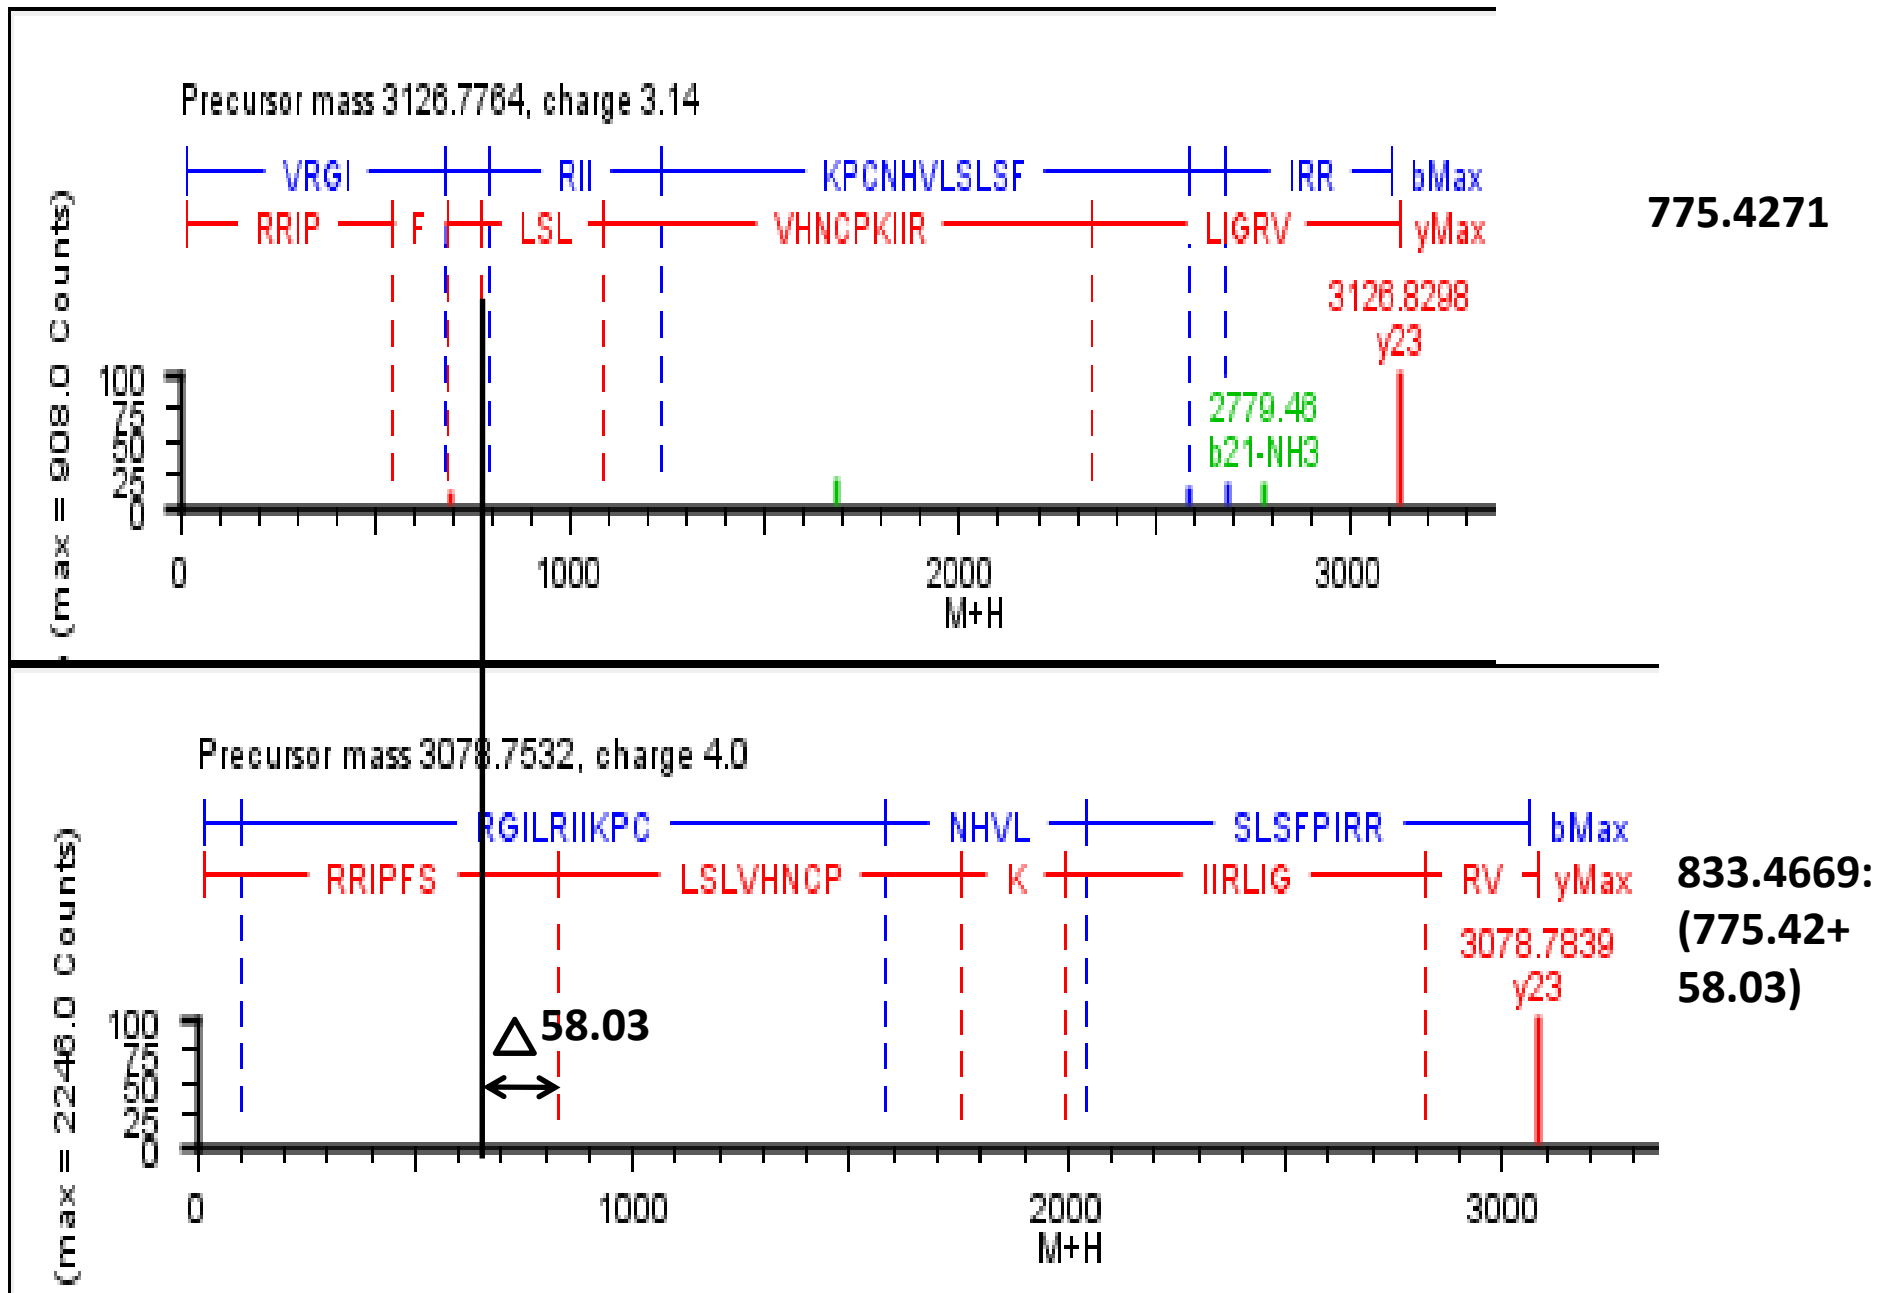

102-124

(R)VRGILRIIKPCNHVLSLSFPIR(Pento)(D)

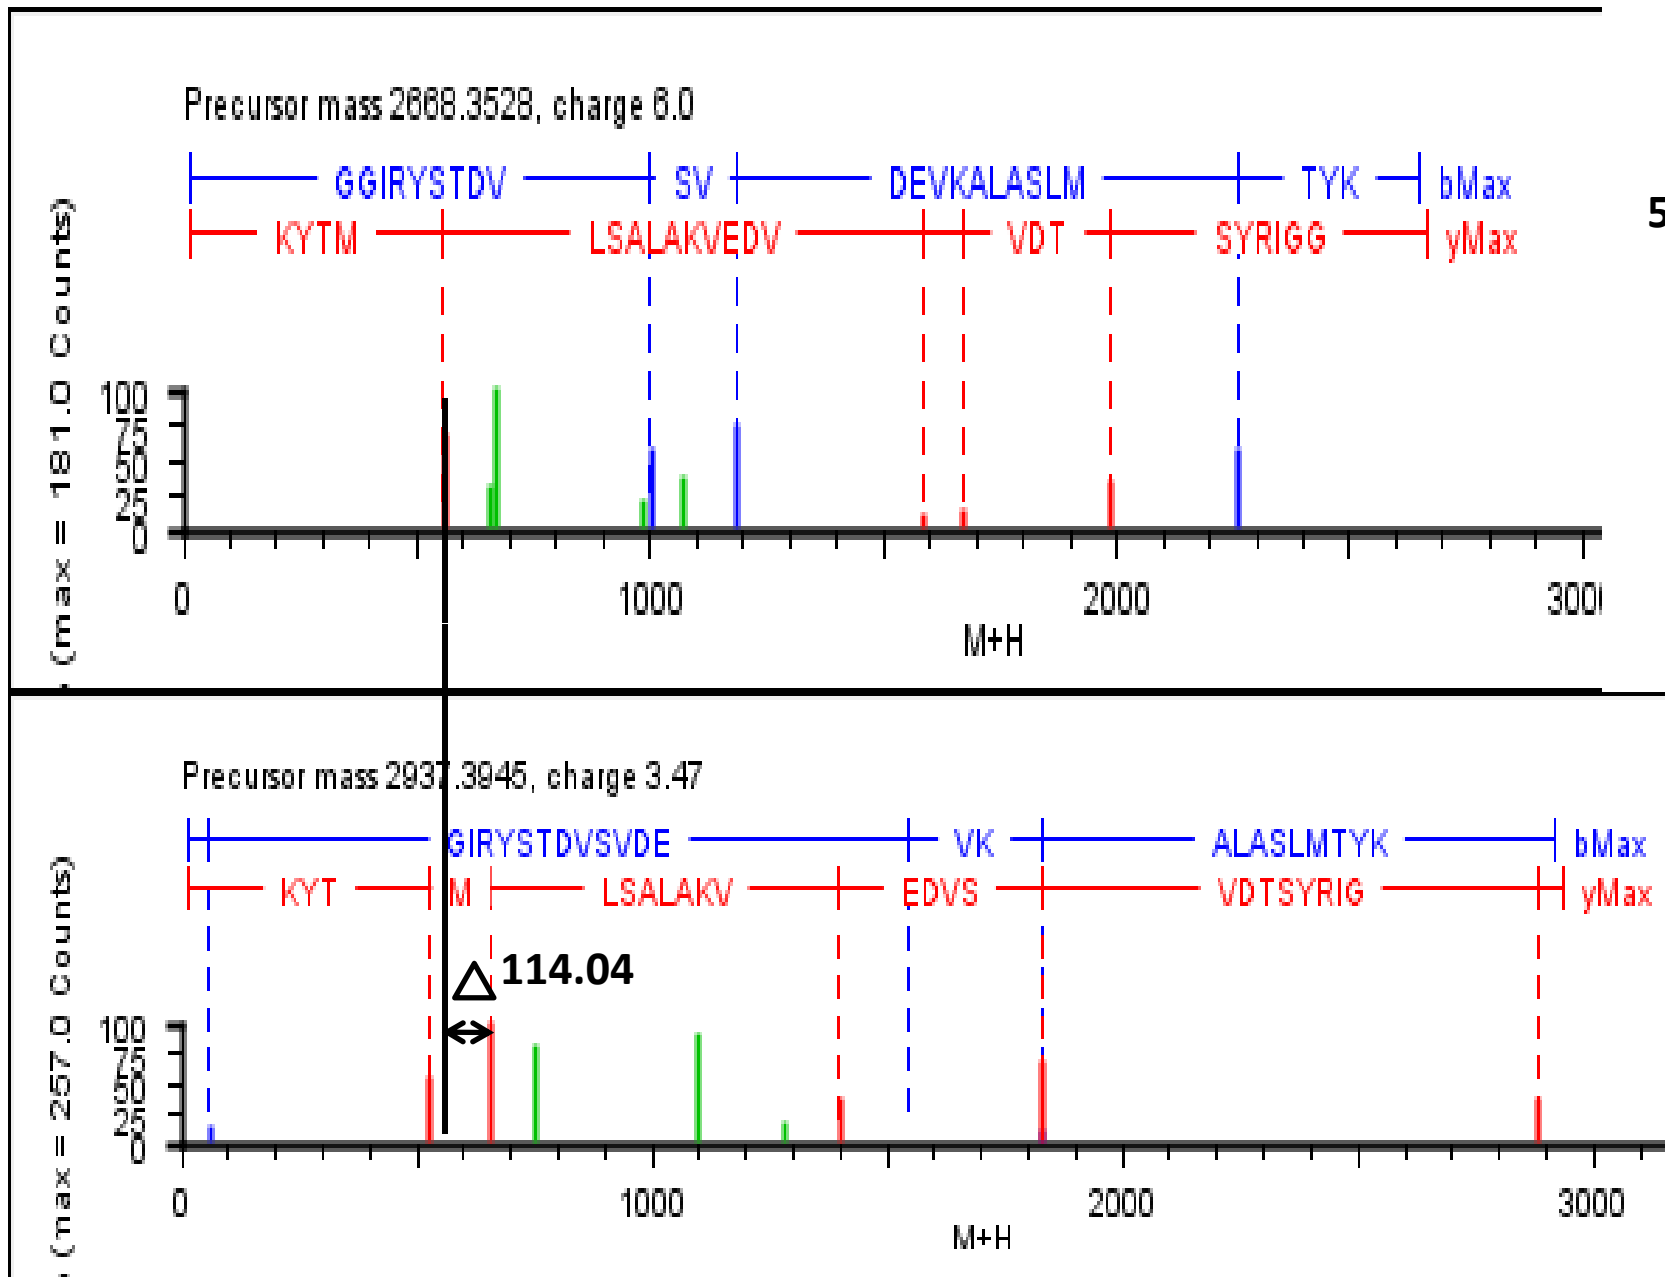

558.2449

656.3623:  
 (558.24+  
 114.04)

148-171

(K)GGIRYSTDVSVDVDEVKALASLMTYK(Ubi)(C)

eTFP

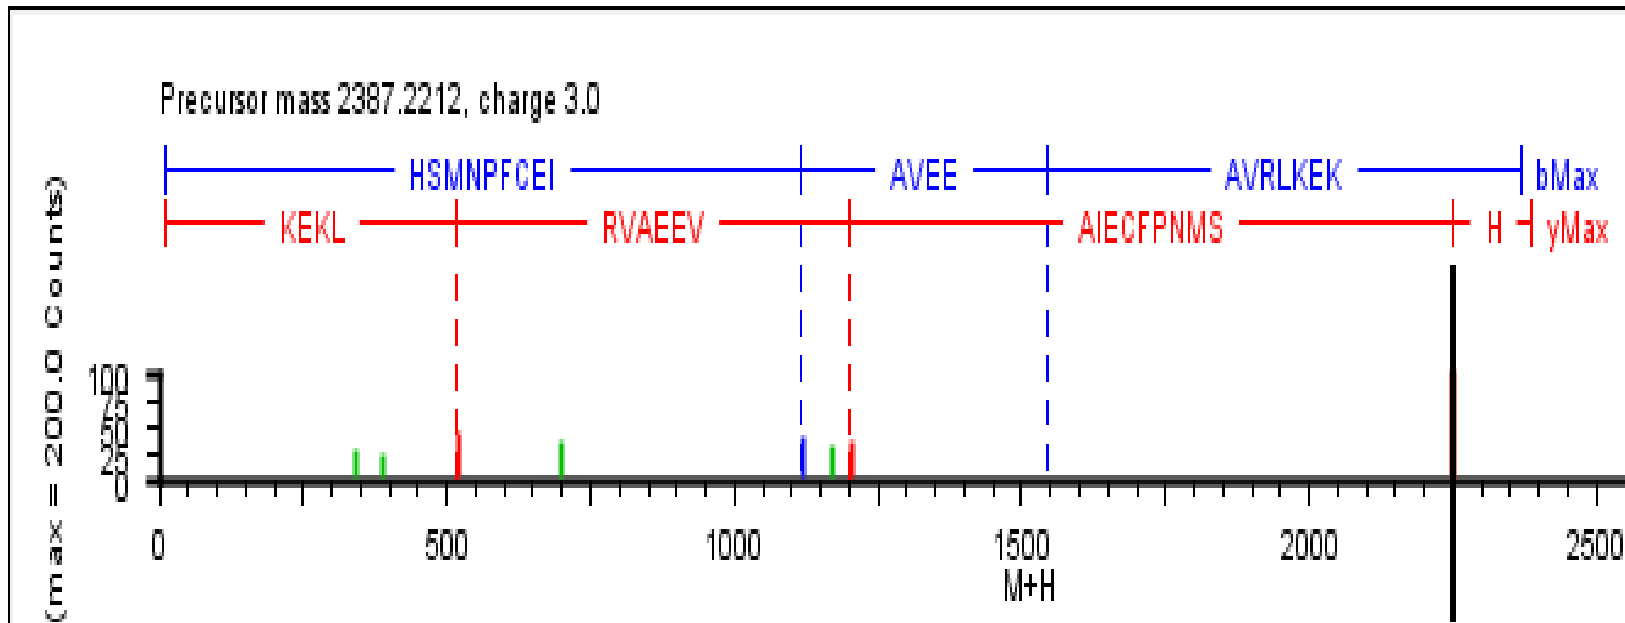

2250.1228

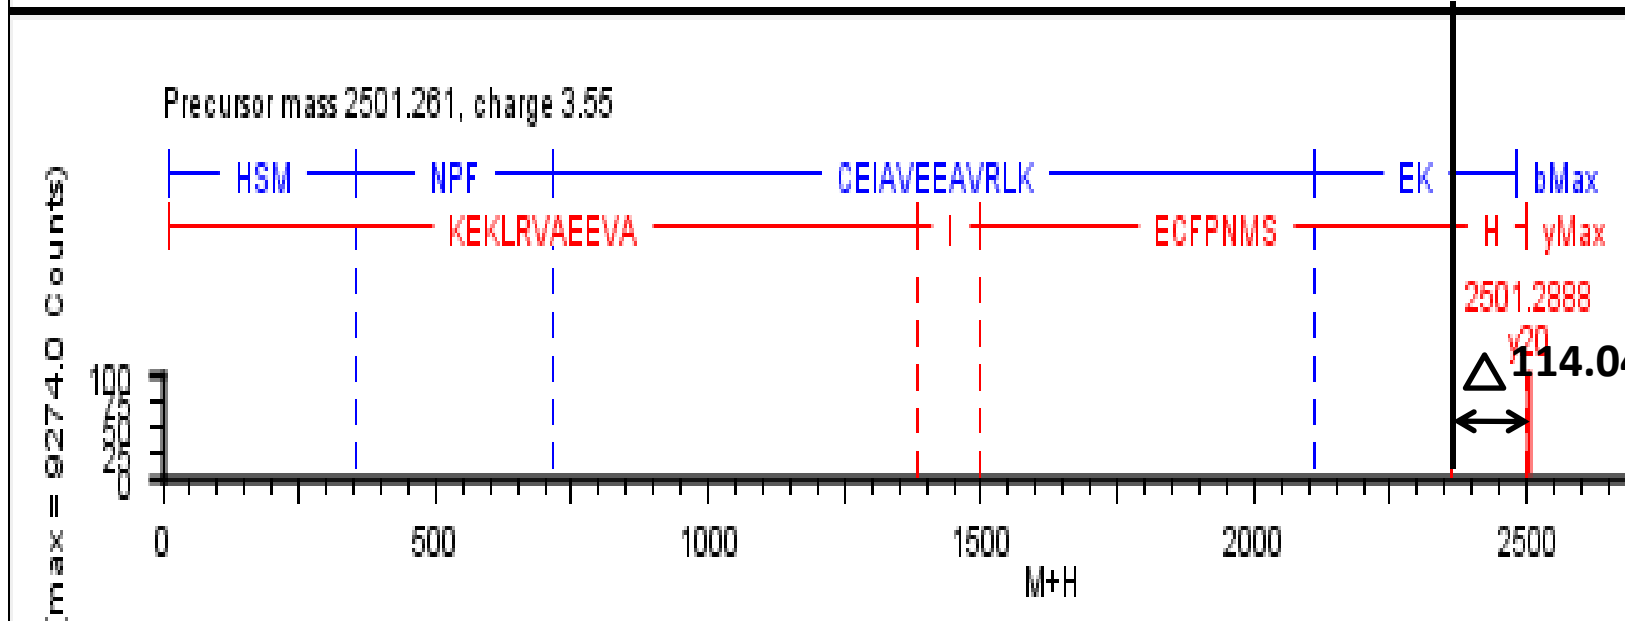

2364.1572:  
(2250.12+  
114.04)

36-55

(K)HSMNPFCEIAVEEAVRLKEK(Ubi)(K)



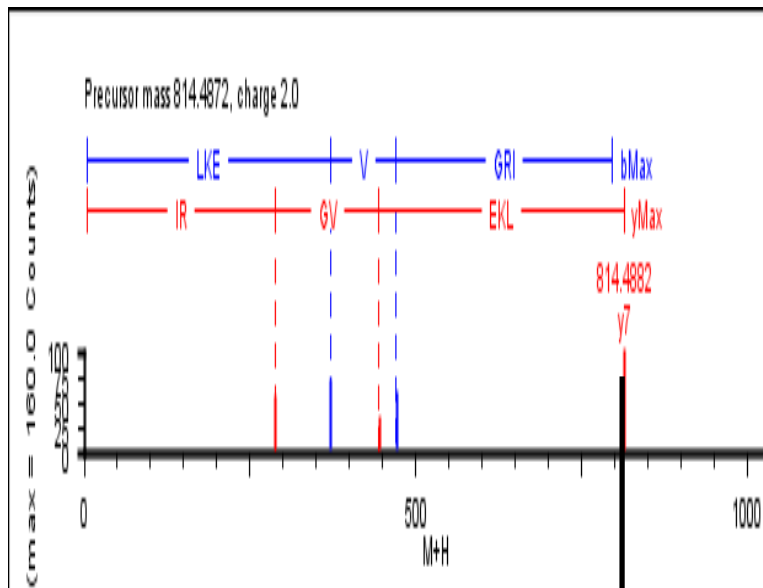

814.4882

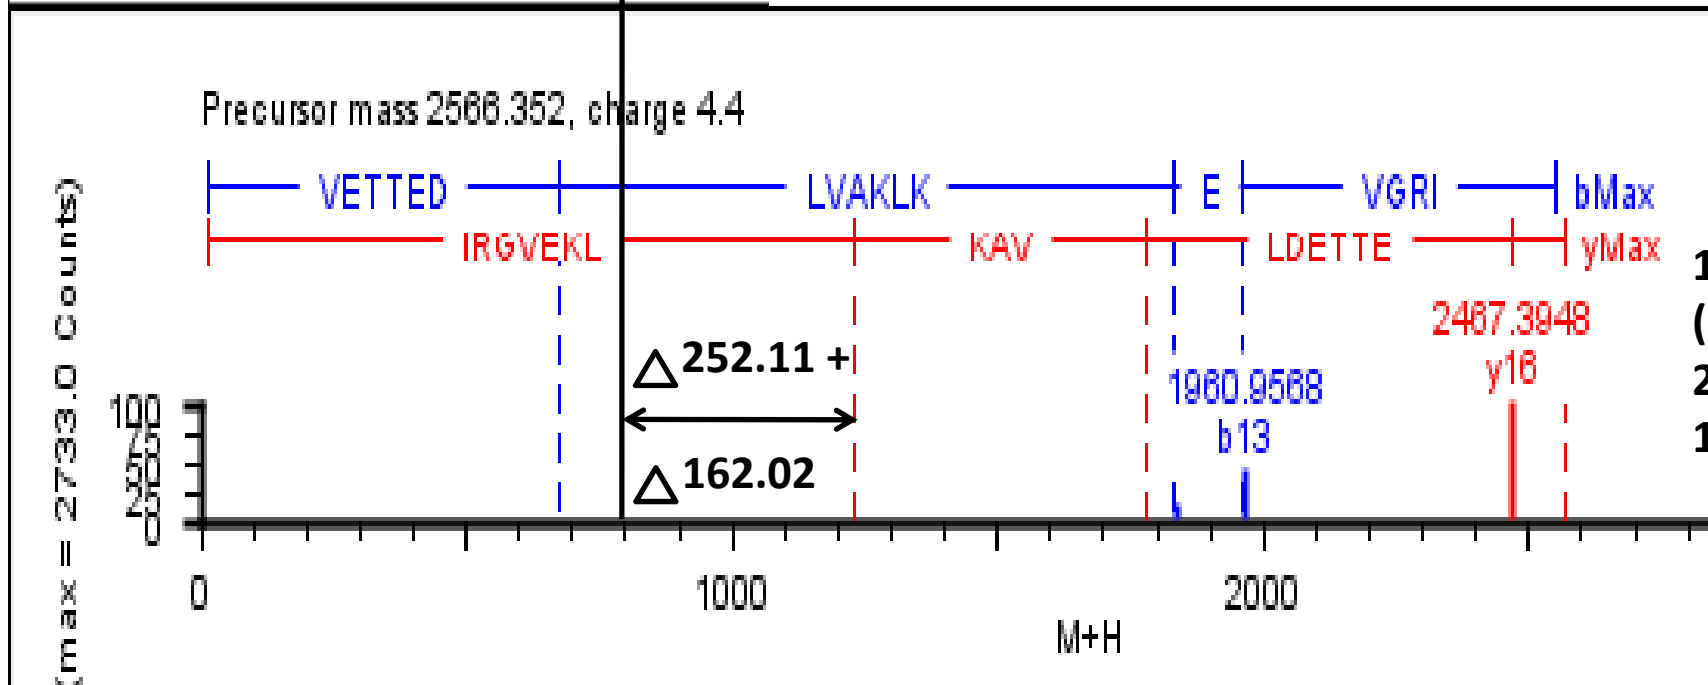

1228.5914:  
(814.48+  
252.11+  
162.02)

239-255

(K)VETTEDLVAKLK(Crossline)EVGR(Gly)I(-)

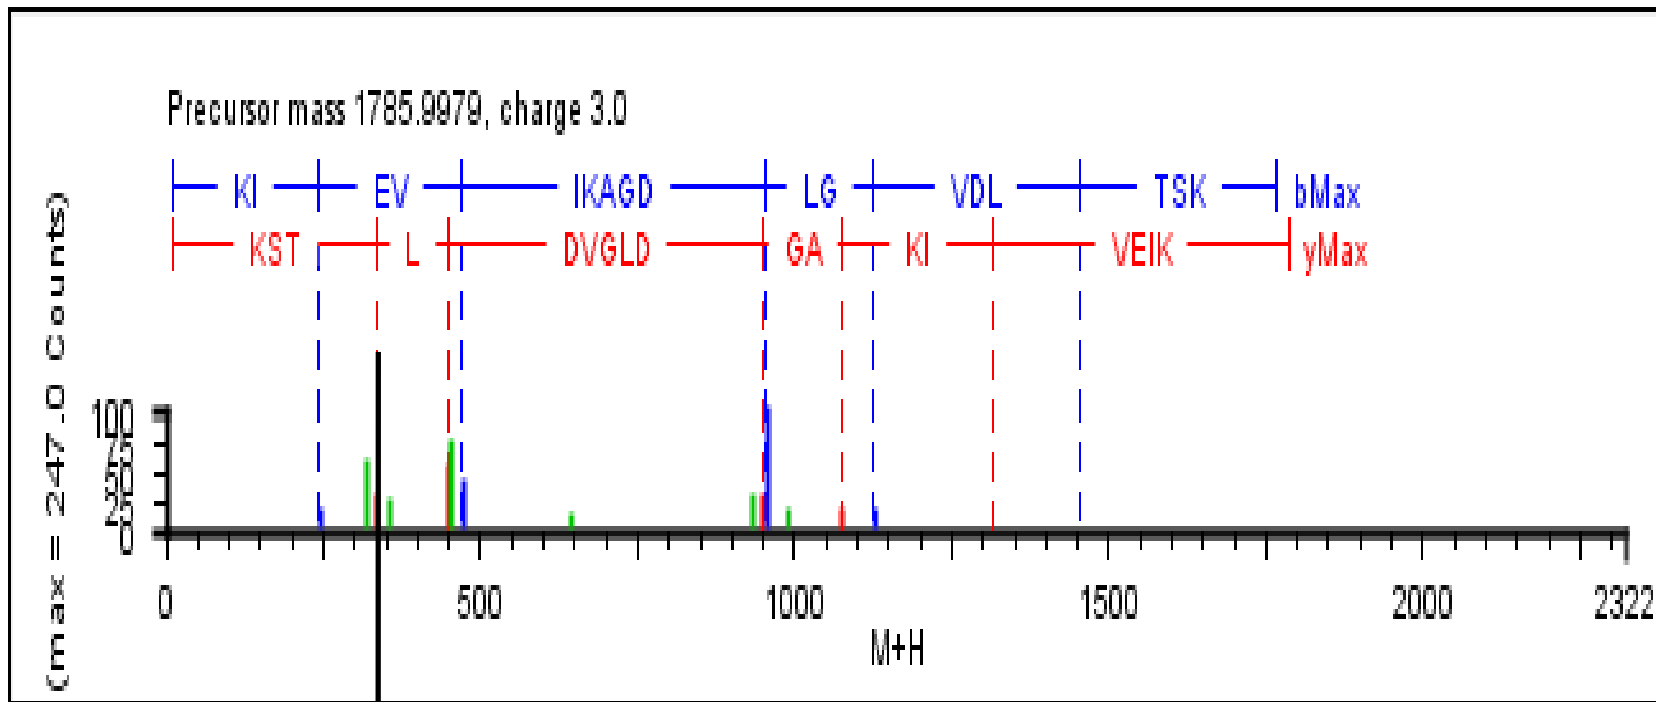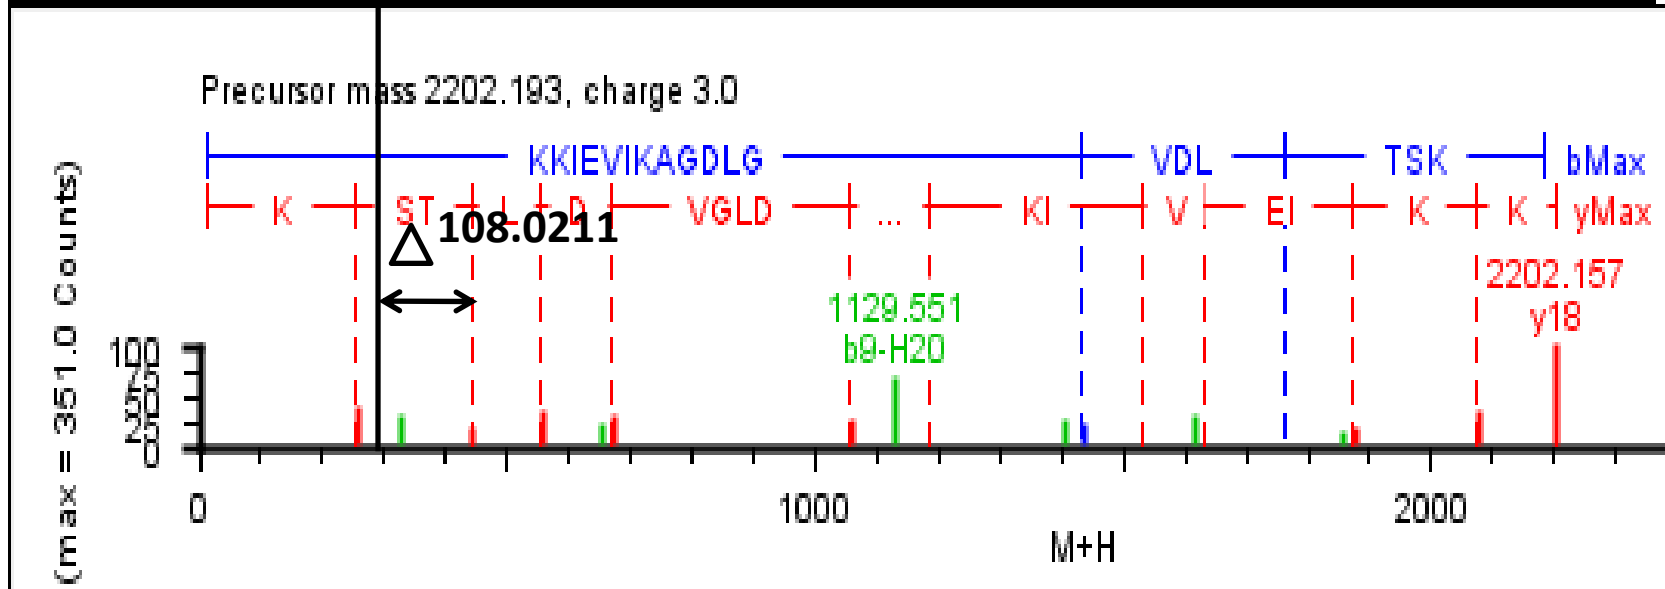

204-221

(K)KKIEVIKAGDLGVDLTSK(Pyr)(V)

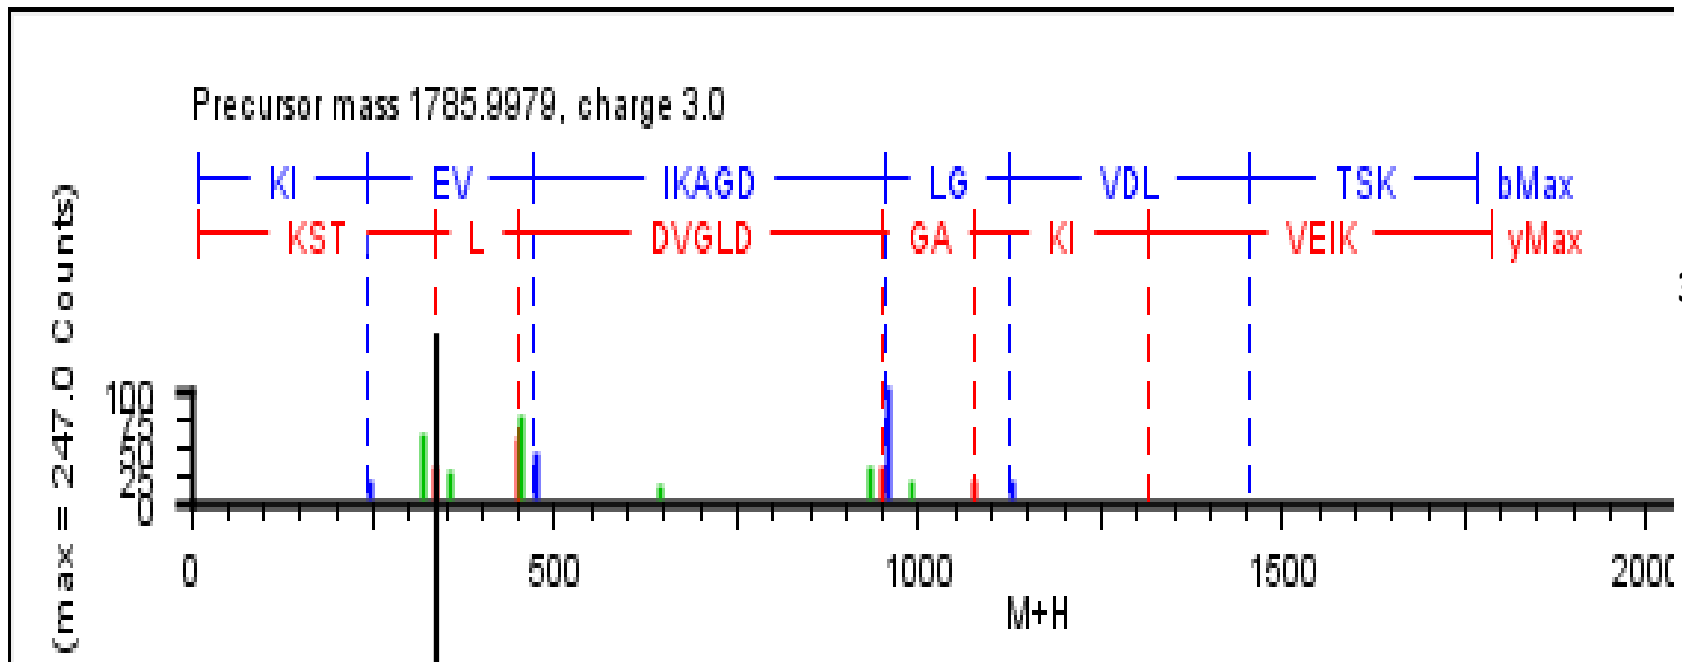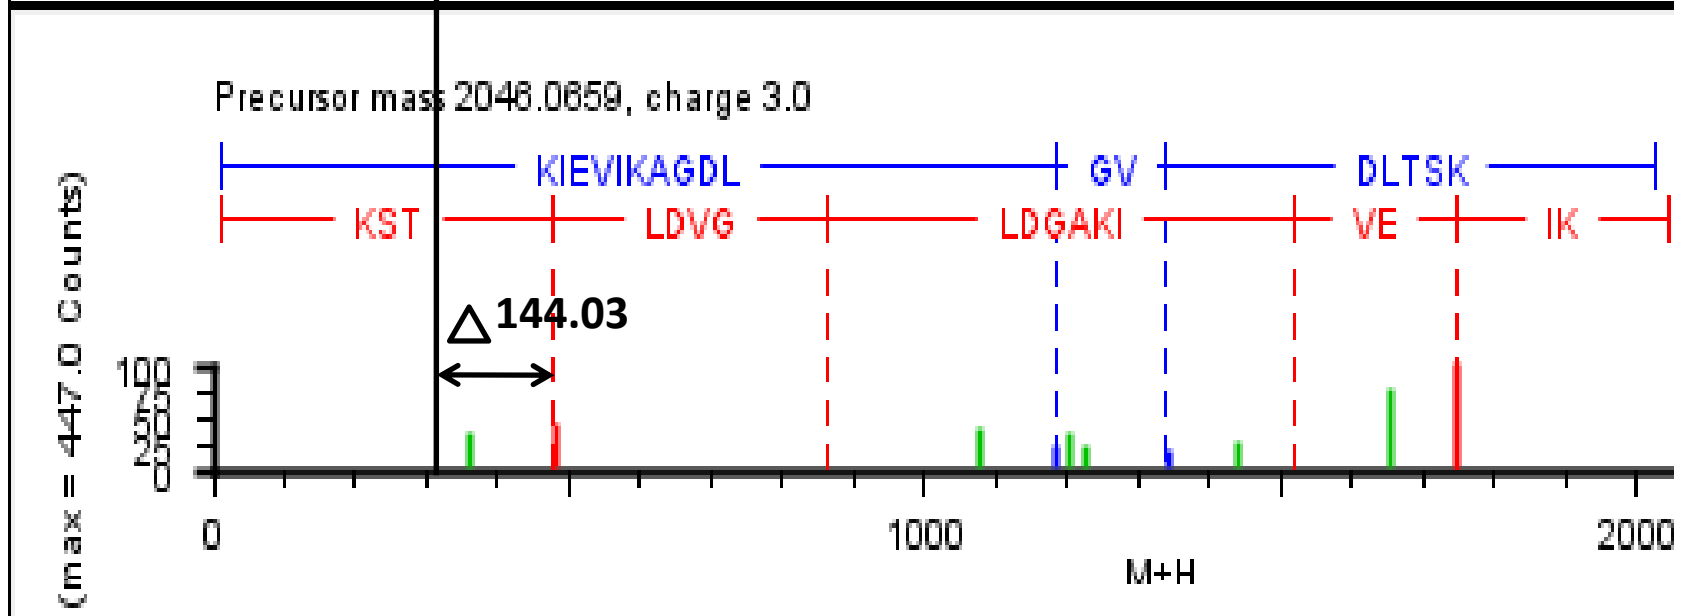

205-221

(K)KIEVIKAGDLGVDLTSK(ImiA)(V)

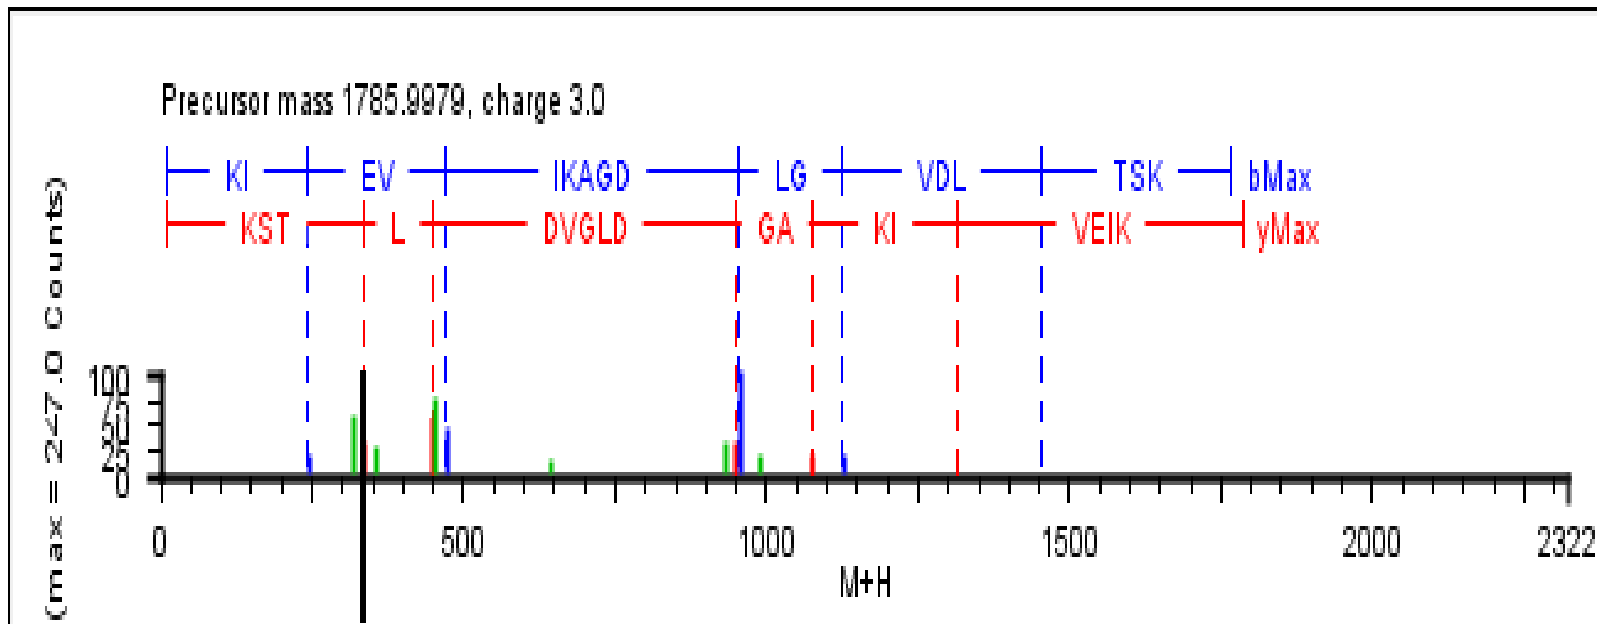

335.1796

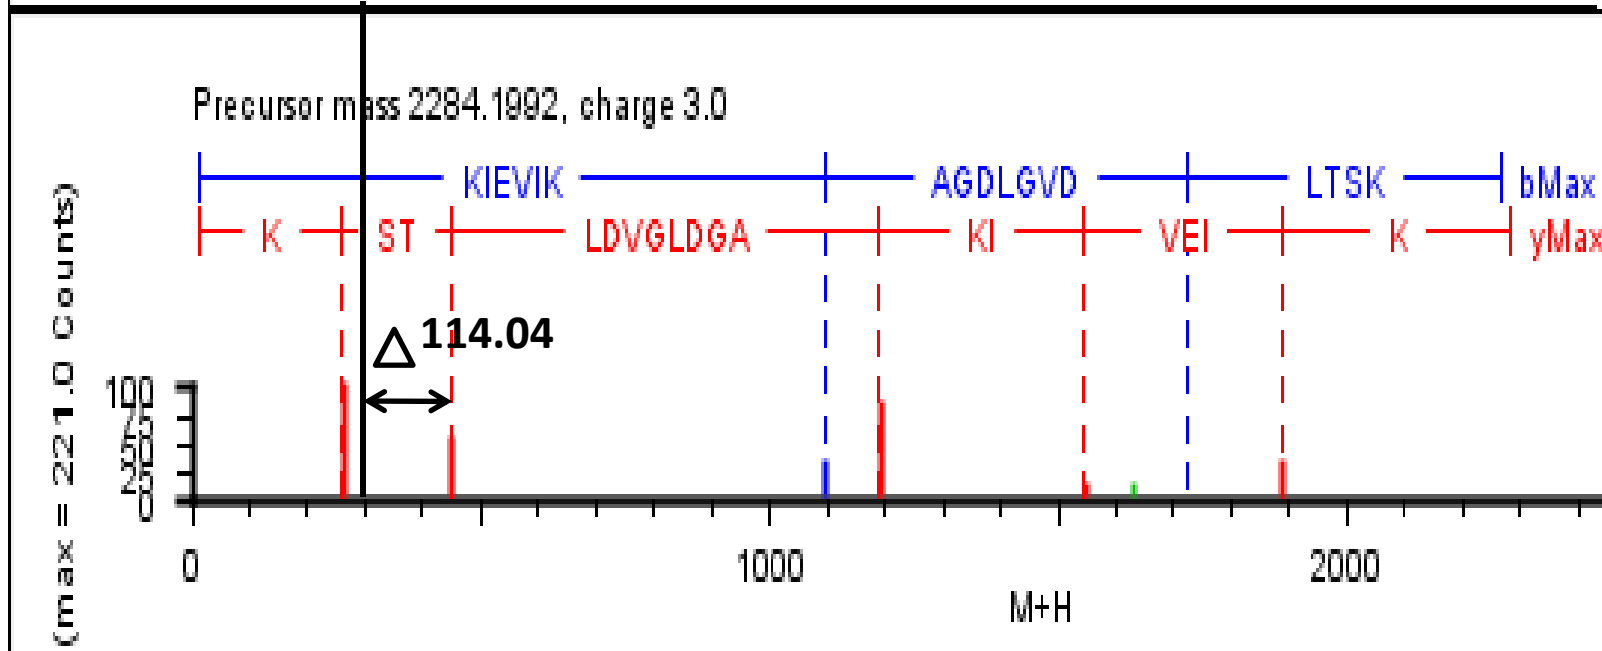

449.1928:  
(3335.17+  
114.04)

205-221

(K)KIEVIKAGDLGVDLTSK(Ubi)(V)

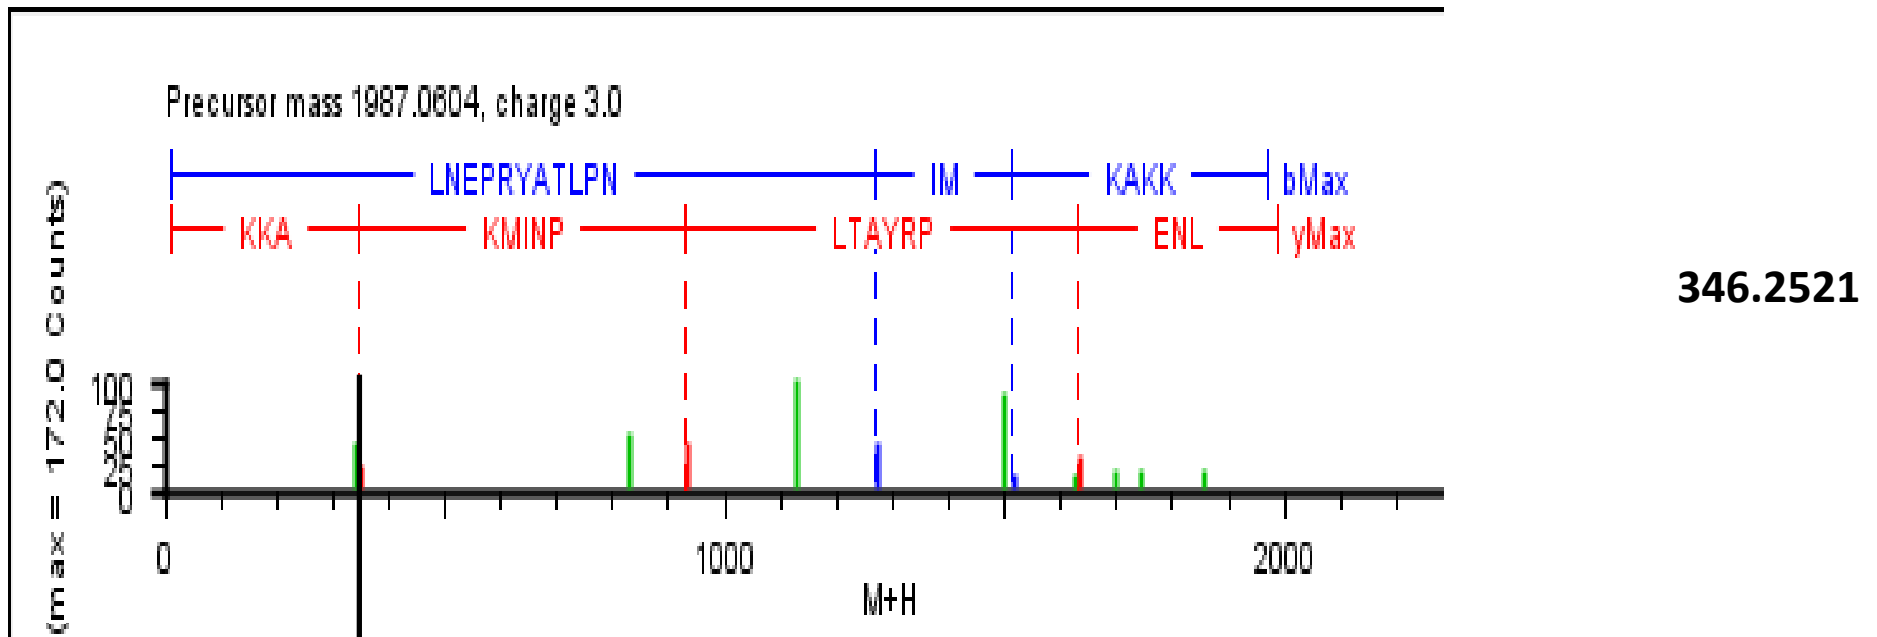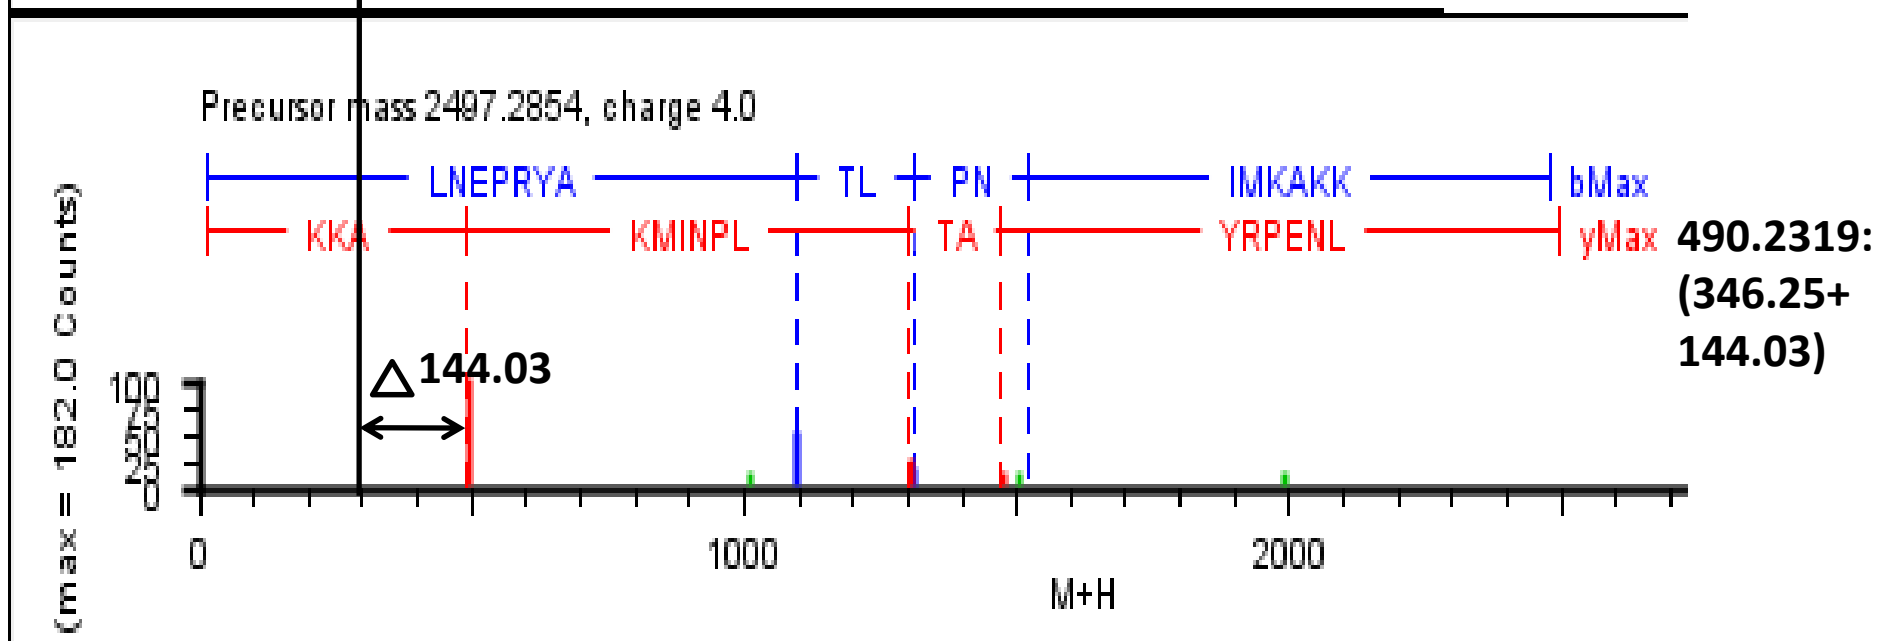

187-203

(R)LNEPRYATLPNIMKAK(ImiA)K(K)

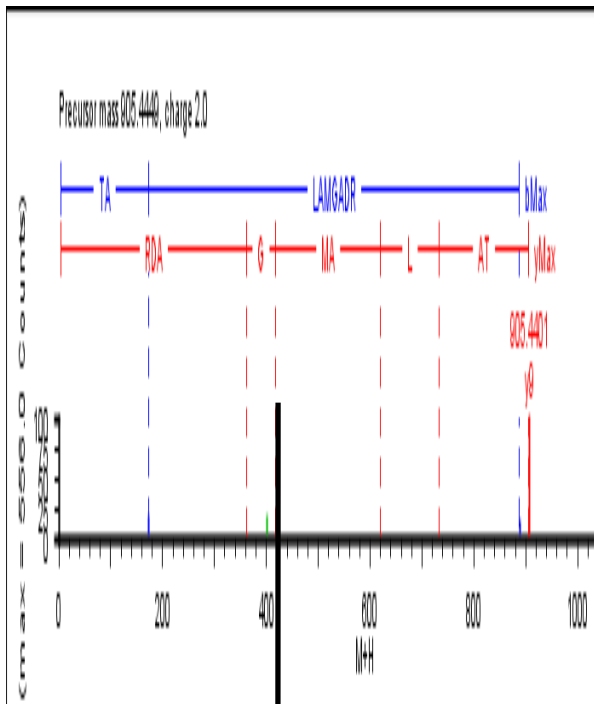

418.1695

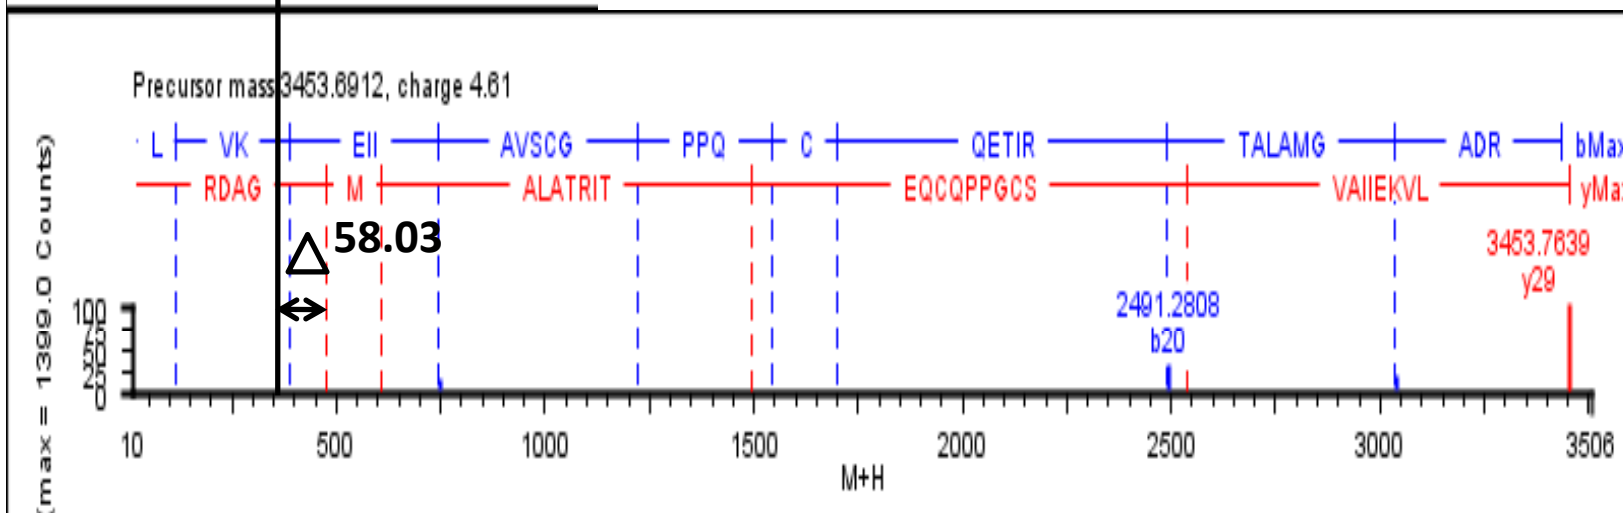

476.2495:  
(418.16+  
58.03)

57-85

(K)LVKEIIAVSCGPPQCQETIRTALAMGADR(Pento)(G)

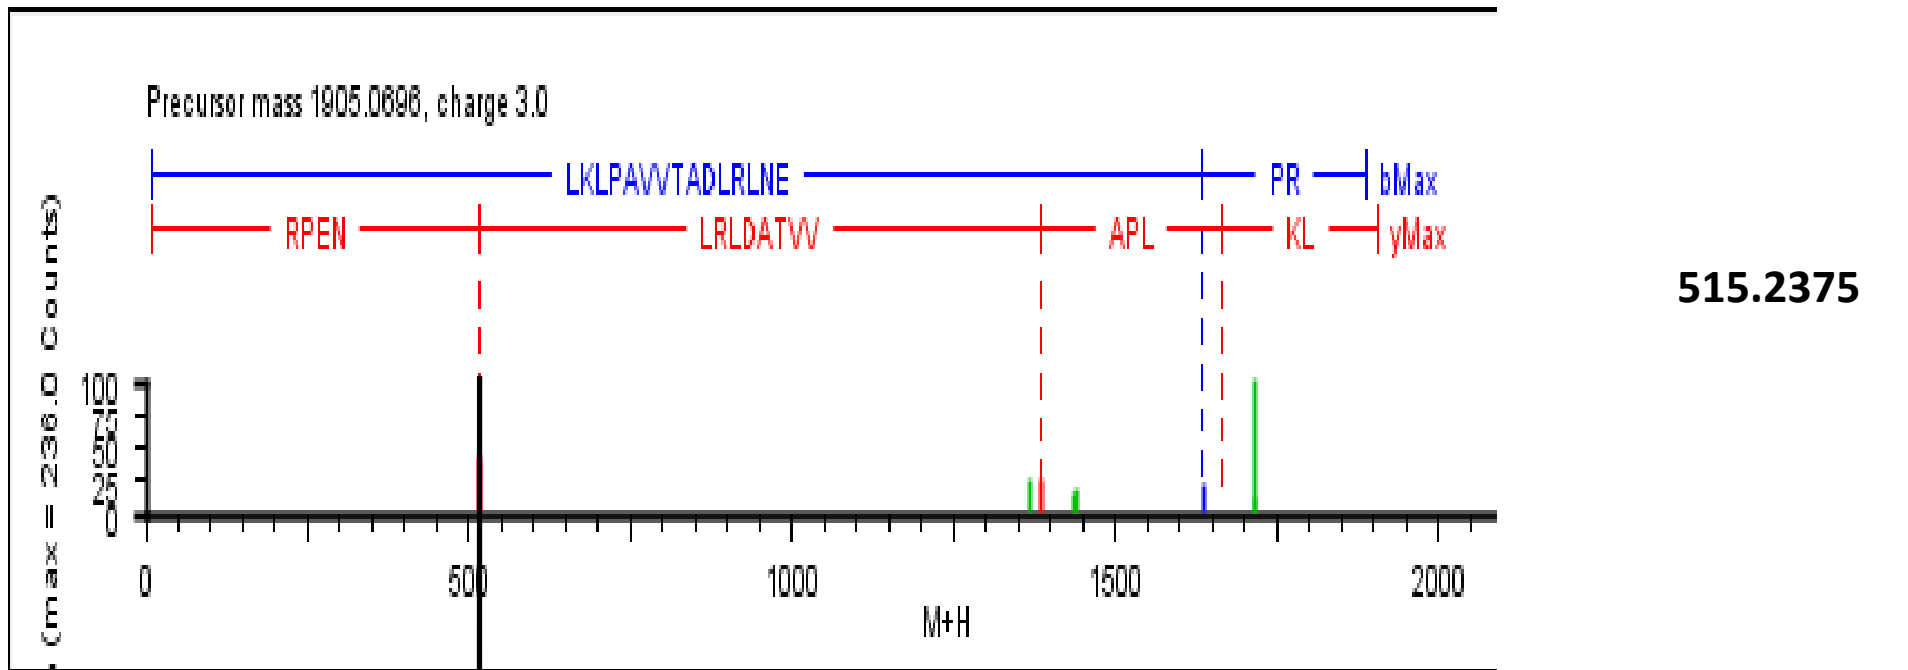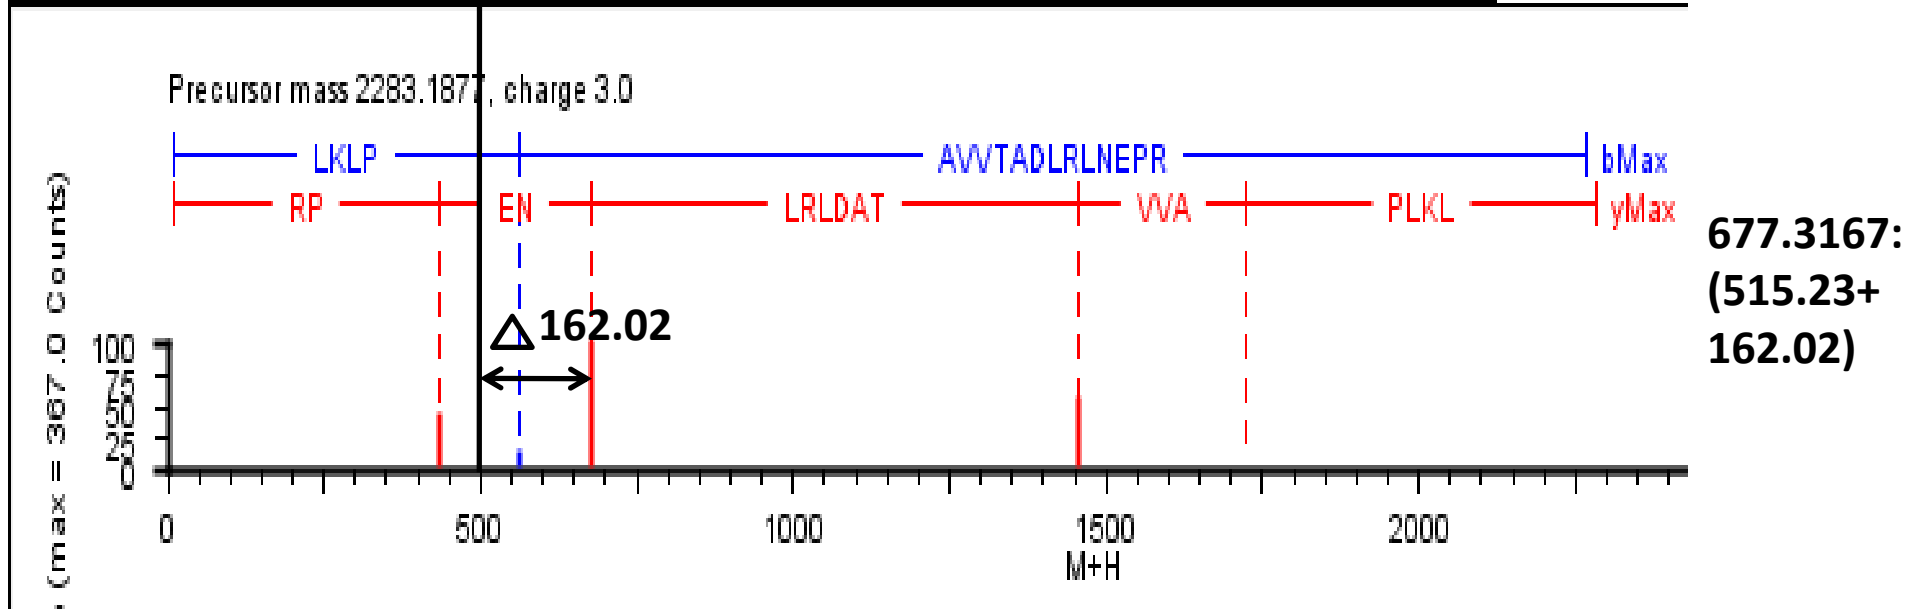

175-191

(R)LKLPVVVTADLRLNEPR(Gly)(Y)

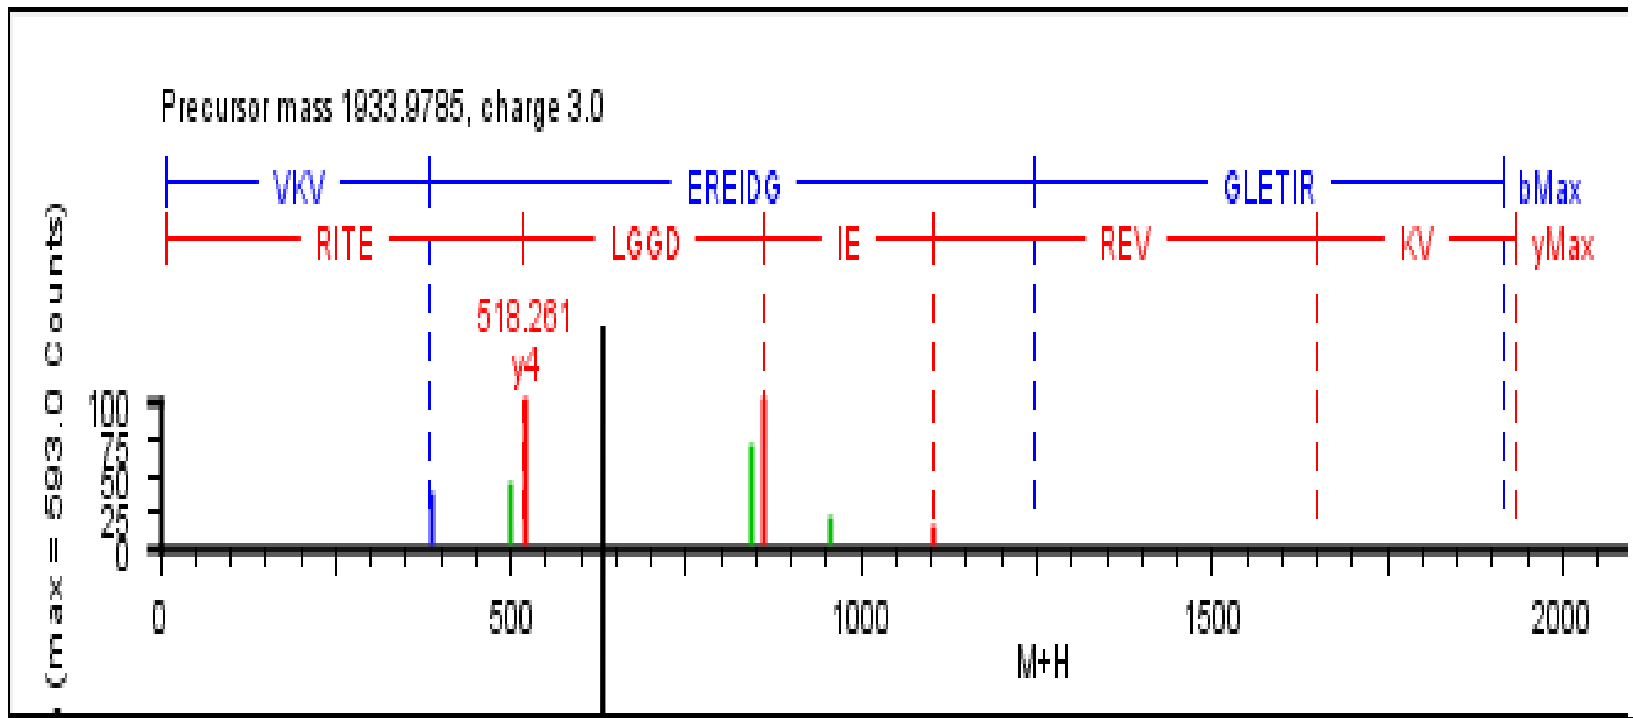

518.261

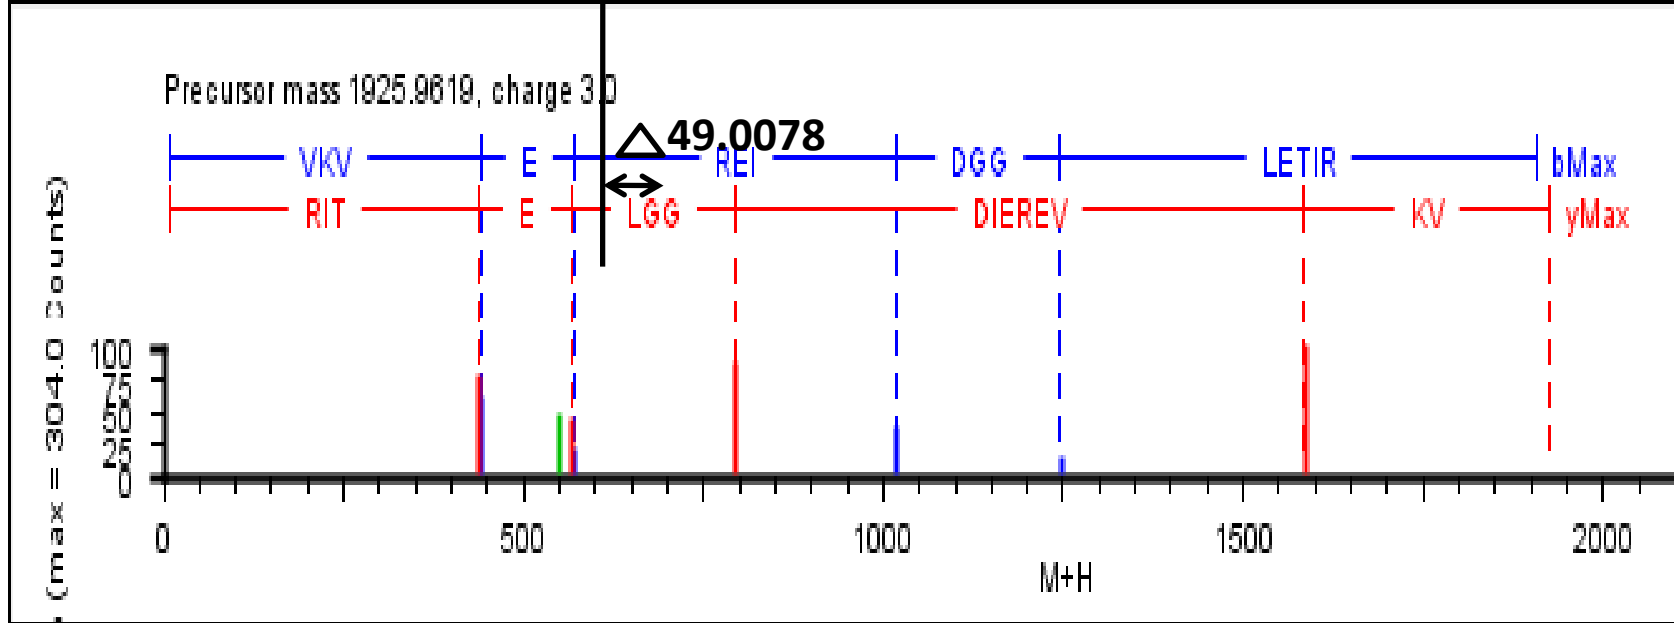

567.3021:  
(518.26+  
49.00)

160-174

(K)VKVEREIDGGLETIR(MOLD)(L)



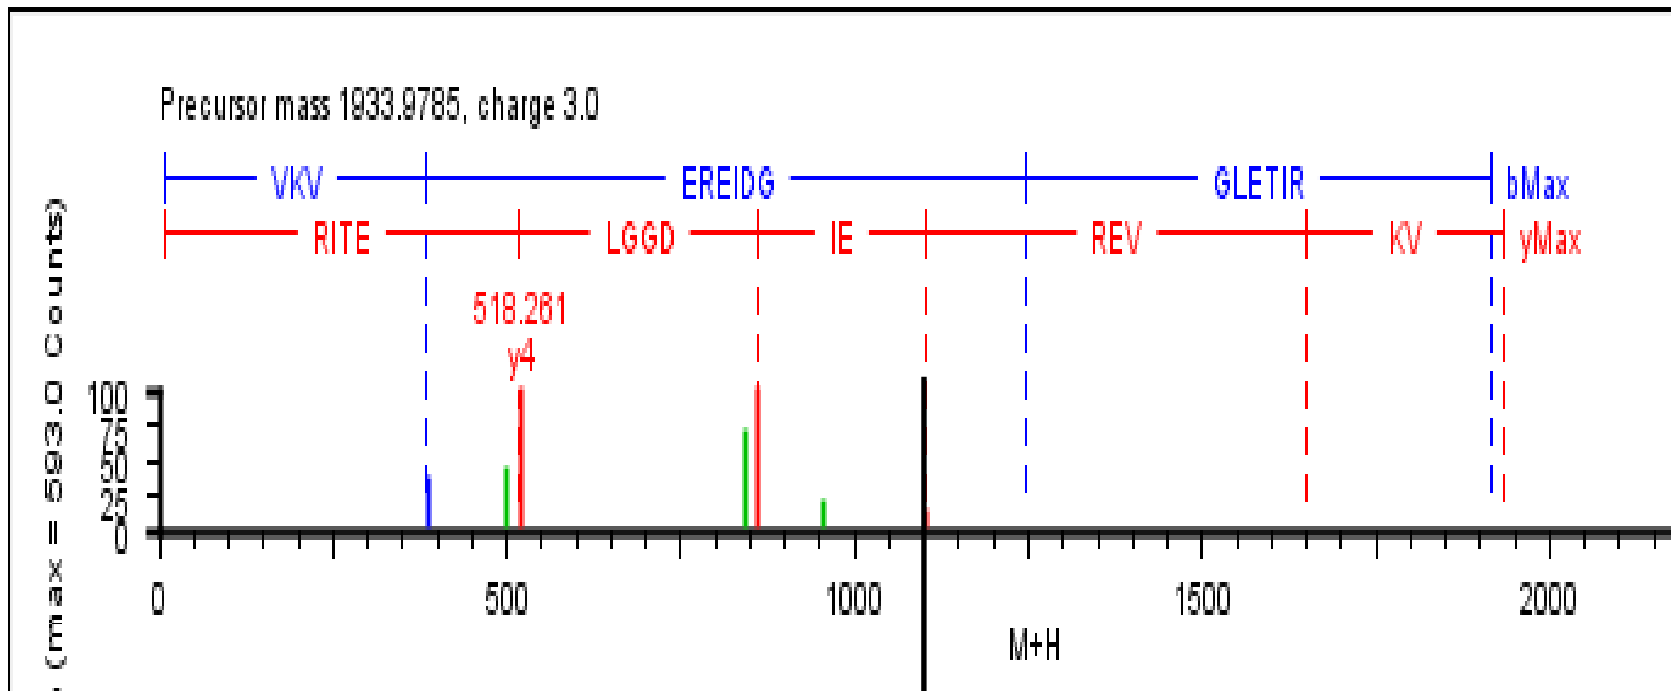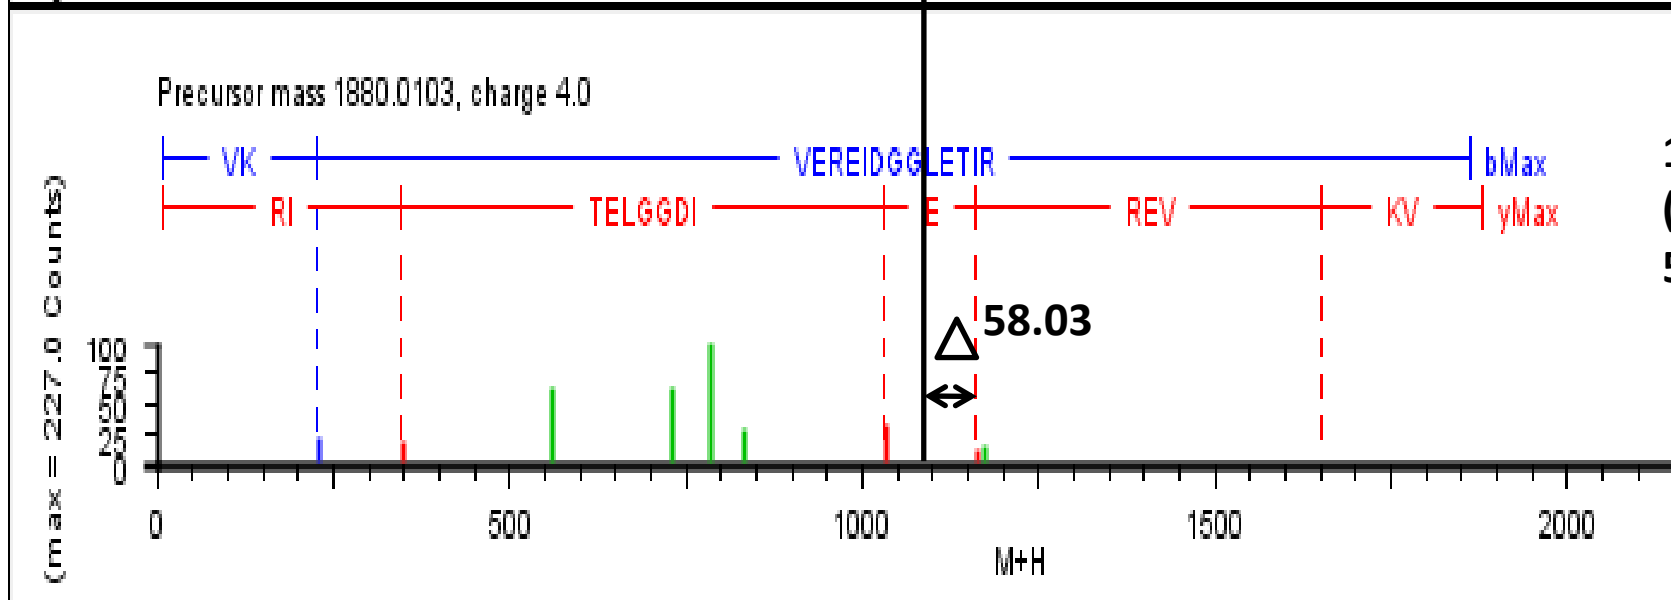

160-174

(K)VKVEREIDGGLETIR(Pento)(L)

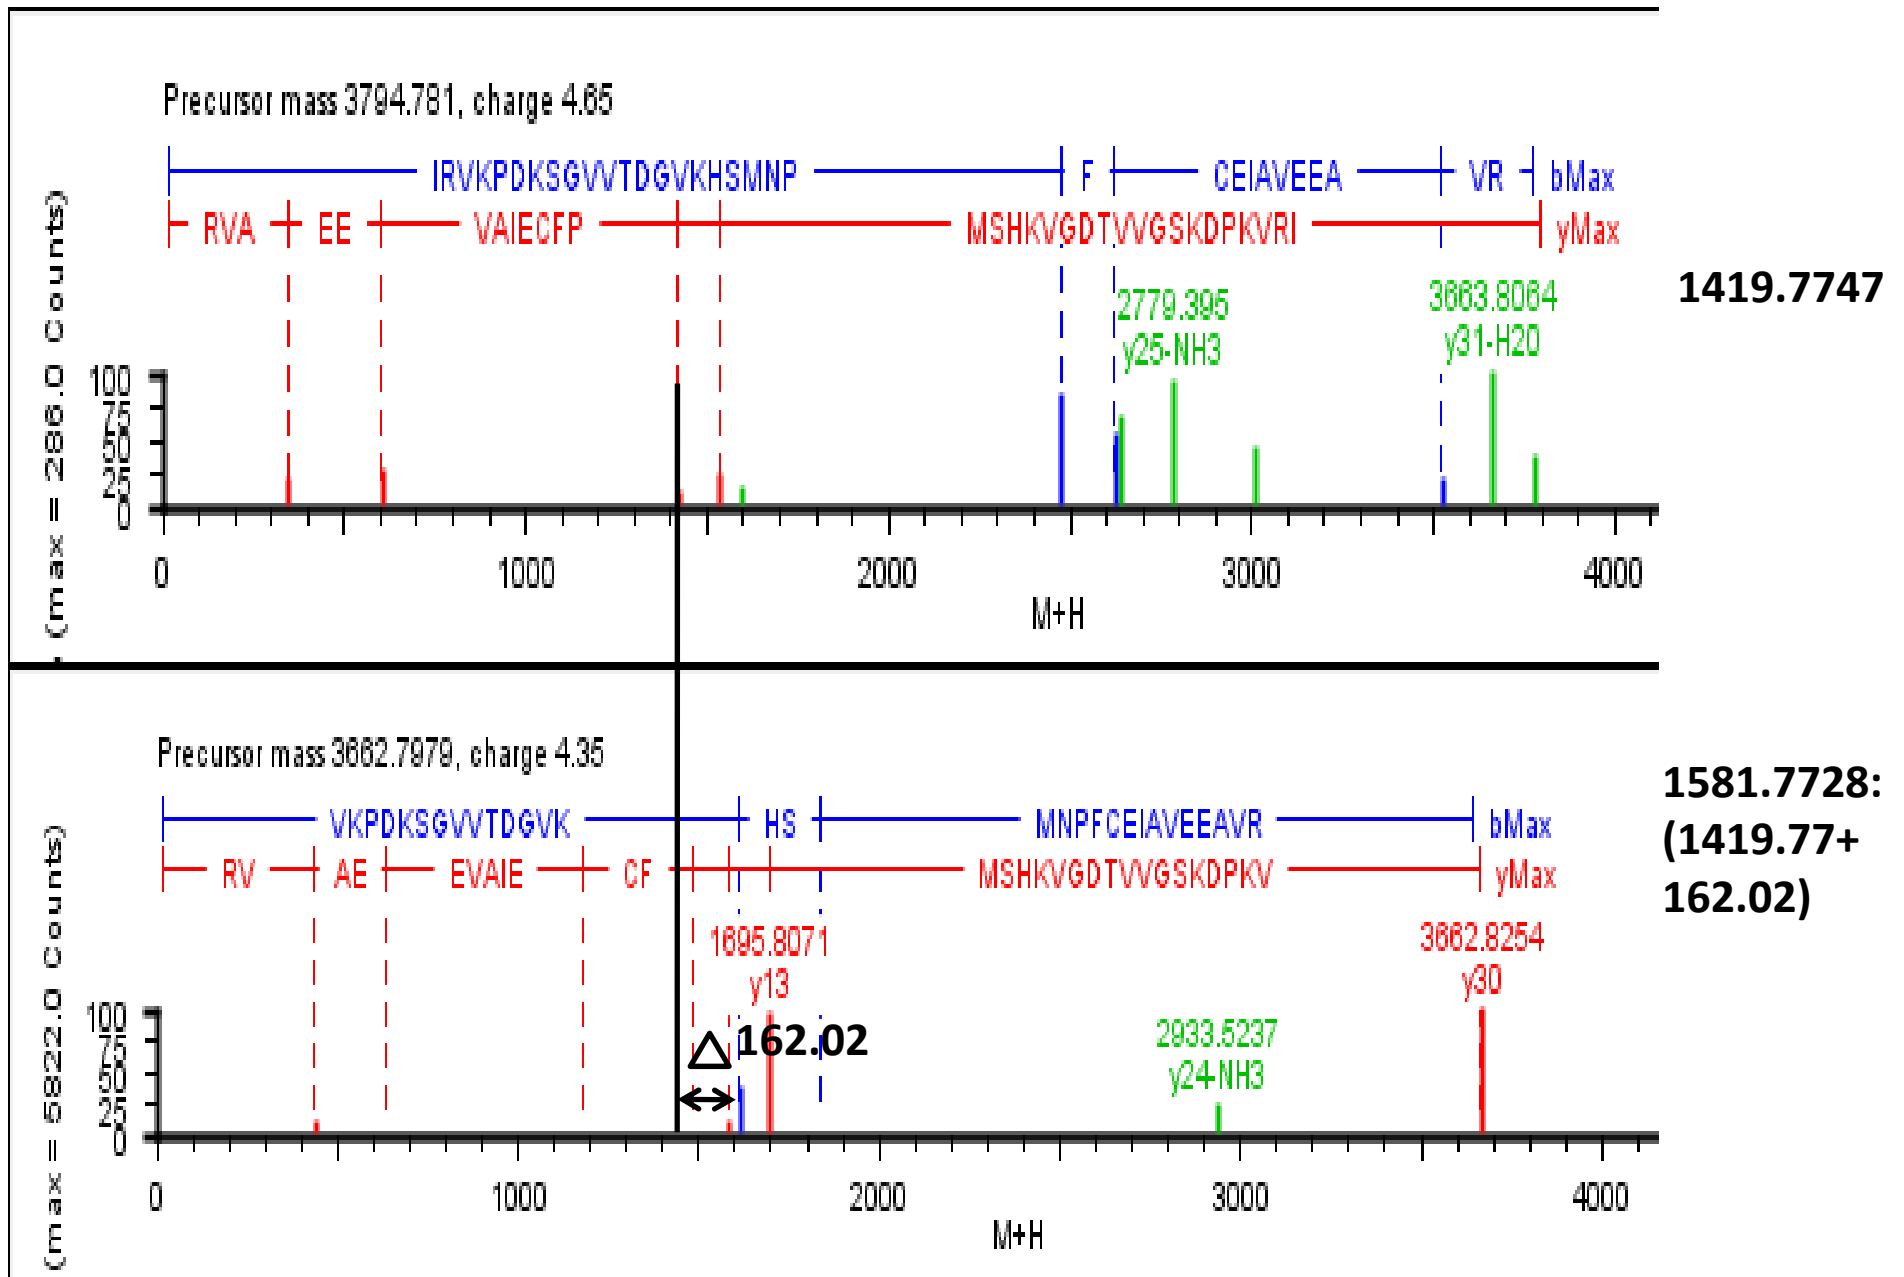

22-51

(R)VKPDKSGVVTGDKHSMNPFCEIAVEEA**R(Gly)**(L)

Hydroxy Acyl Co A

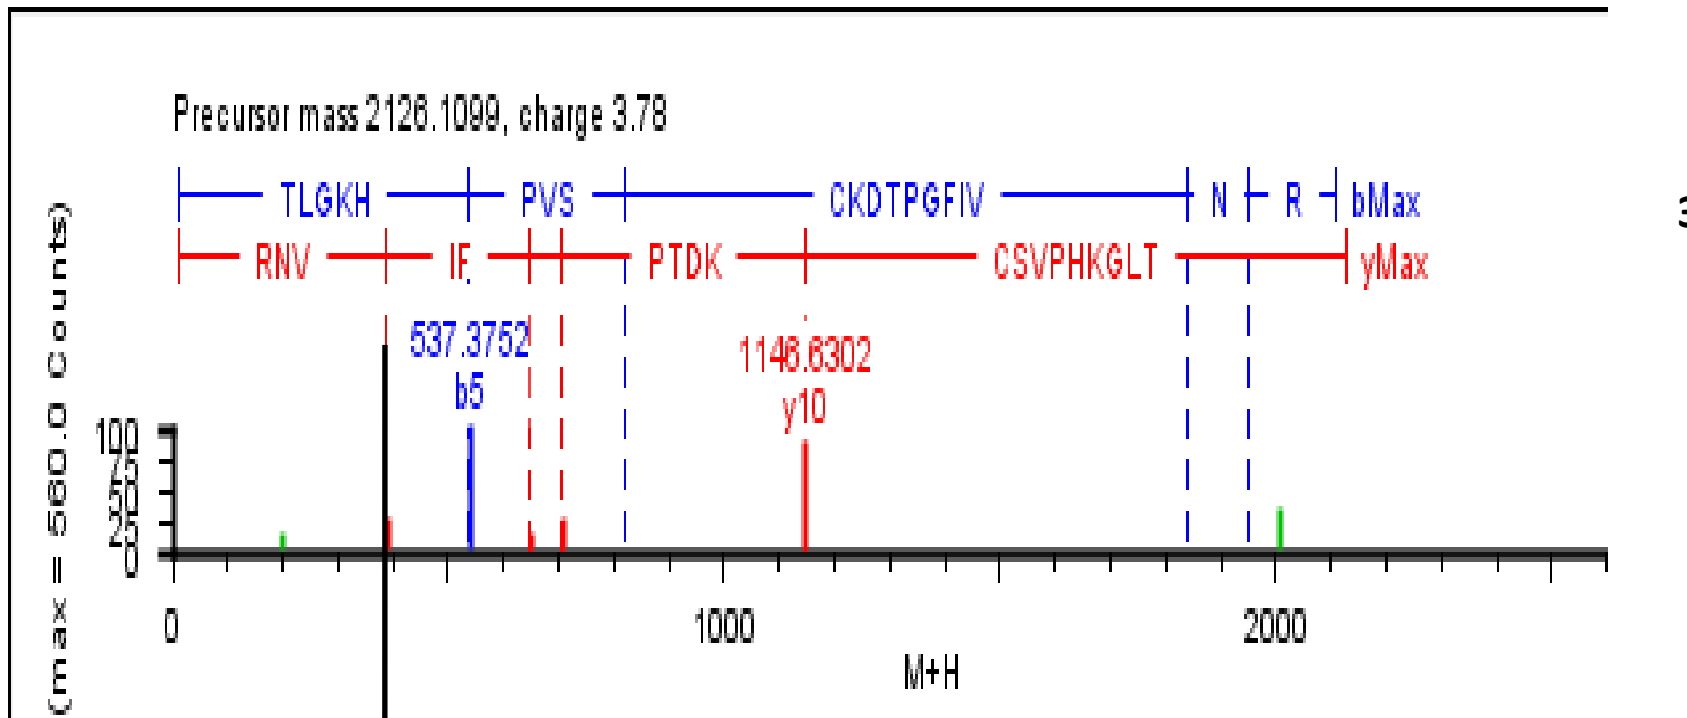

388.2265

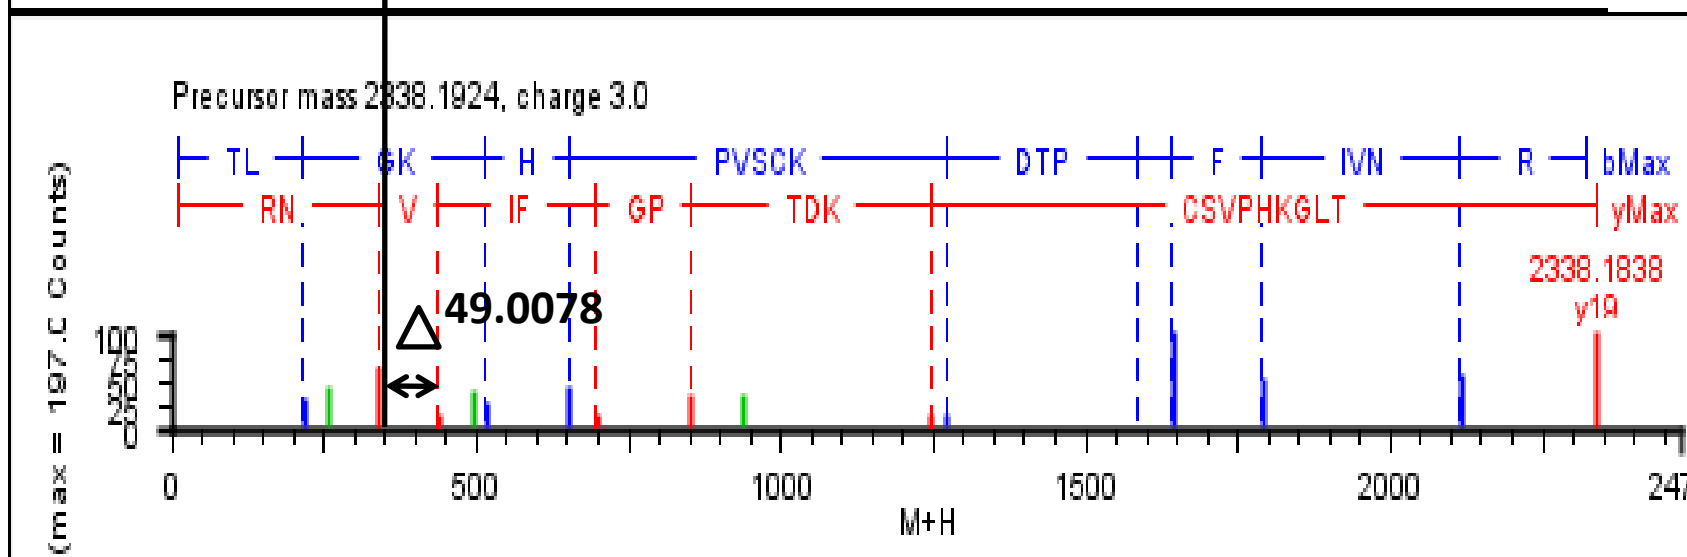

437.2614:  
 (388.22+  
 49.00)

203-221

(K)TLGKHPVSCKDTPGFIVNR(MOLD)(L)

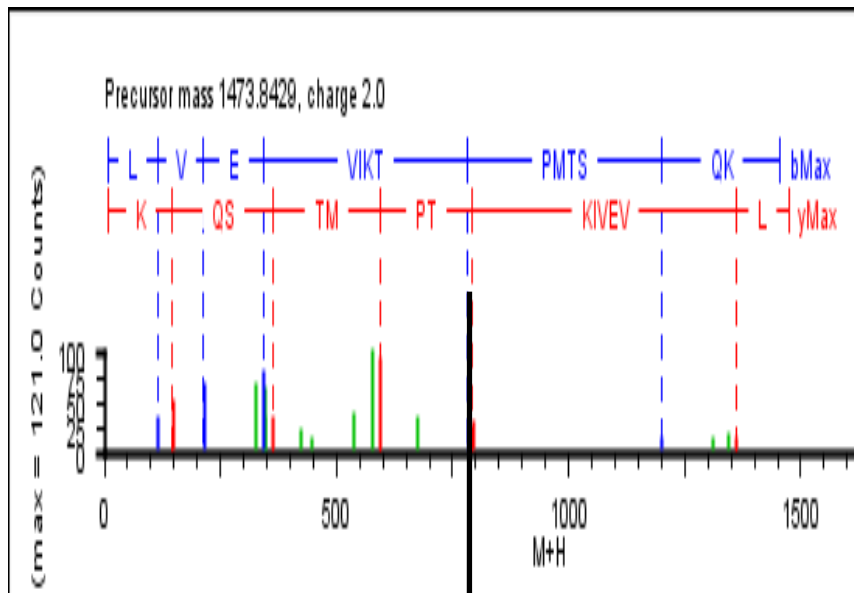

792.4211

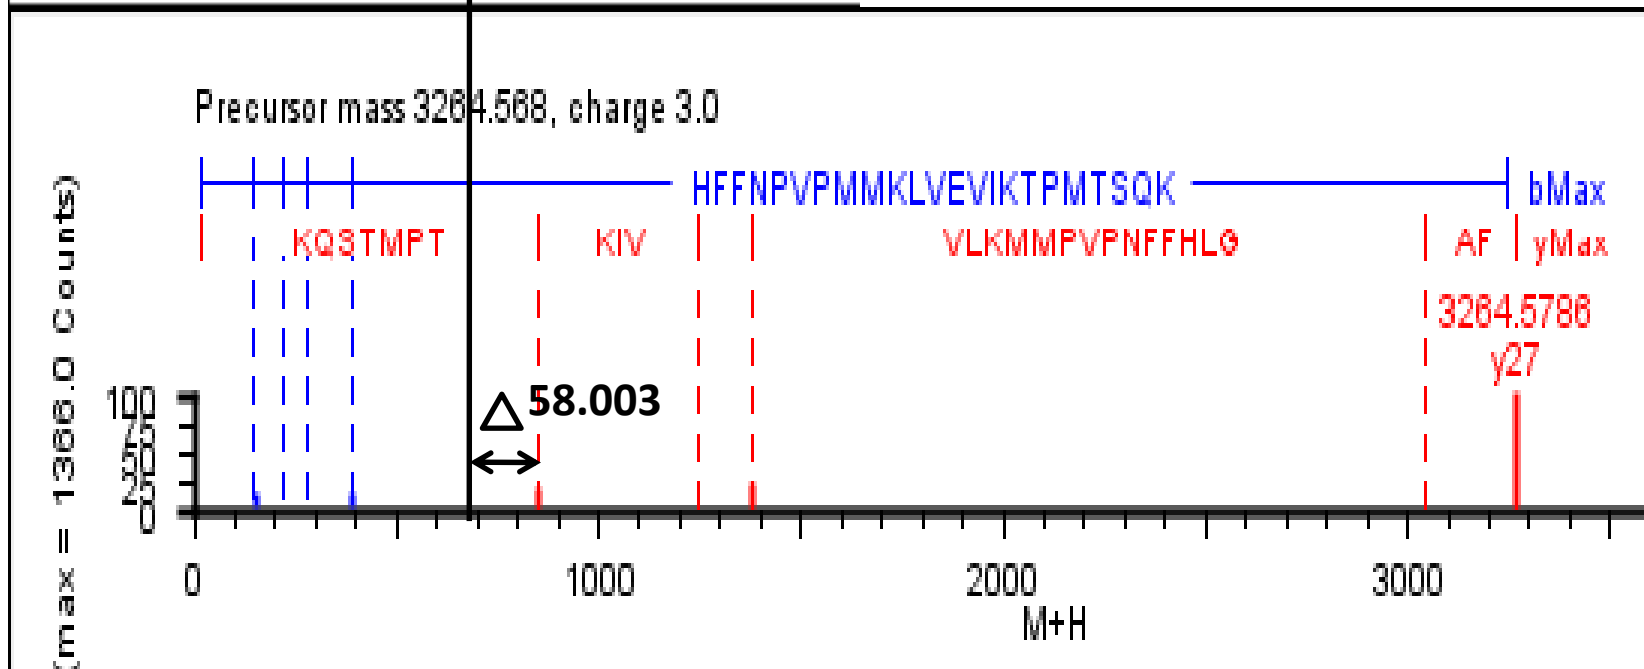

850.4138:  
(792.42+  
58.003)

166-192

(R)FAGLHFFNPVPMMLVEVIKTPMITSQK(CML)(T)

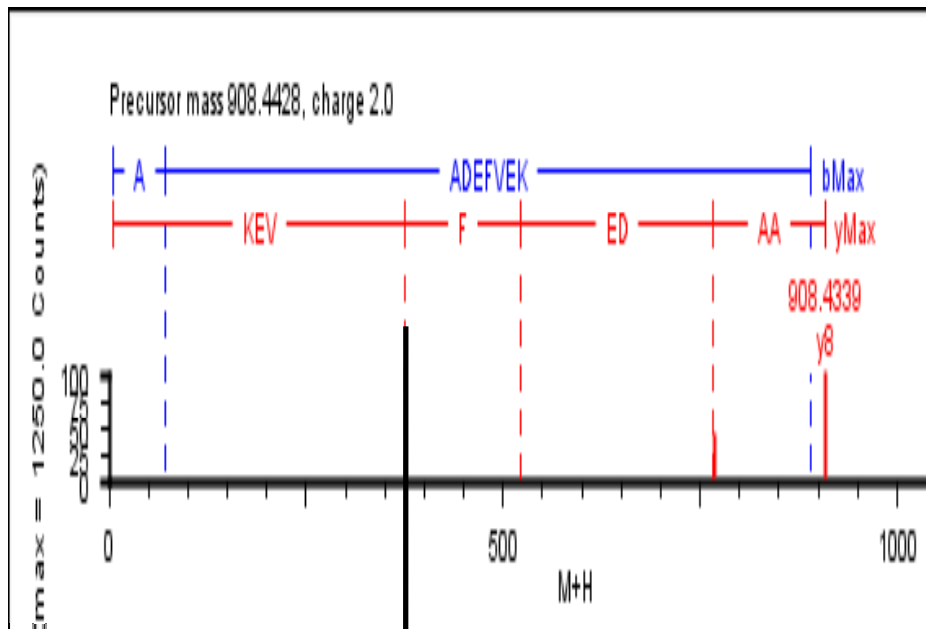

375.2369

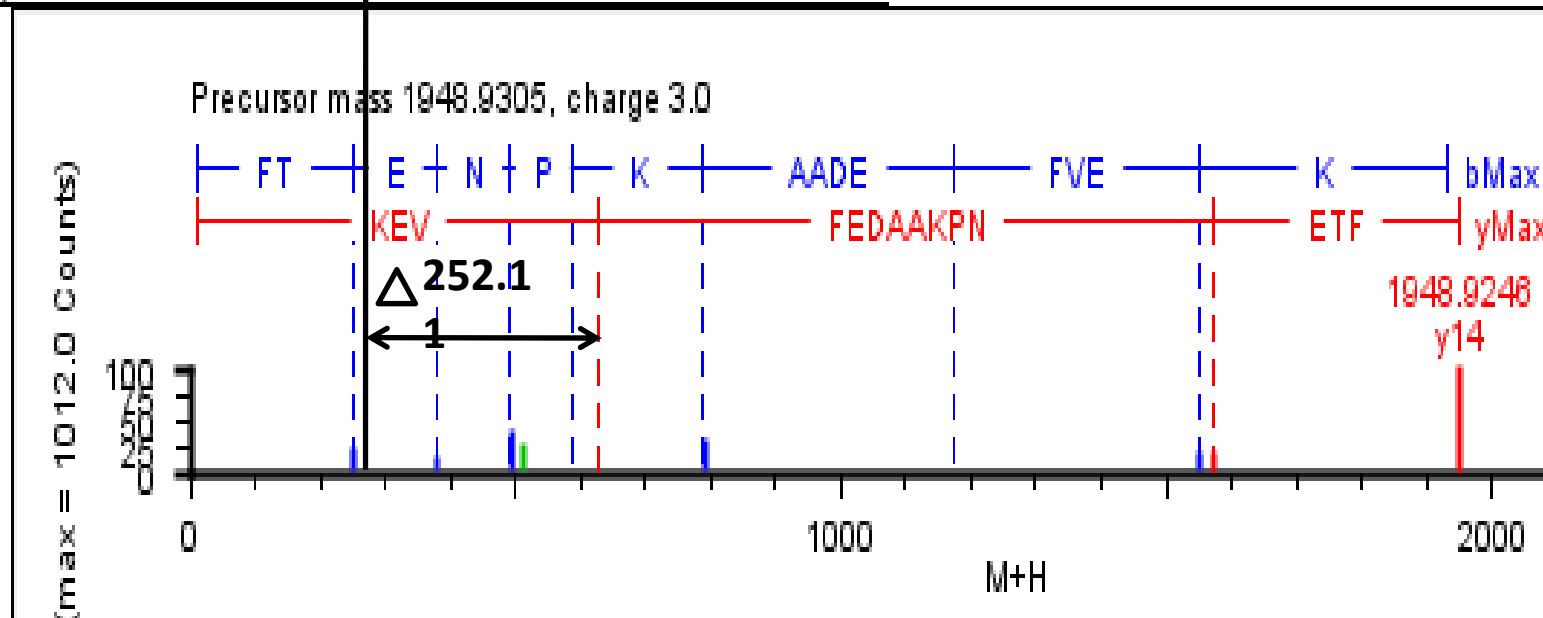

627.3756:  
(375.23+  
252.1)

82-95

(K)FTENPKAADEFVEK(Crossline)(T)

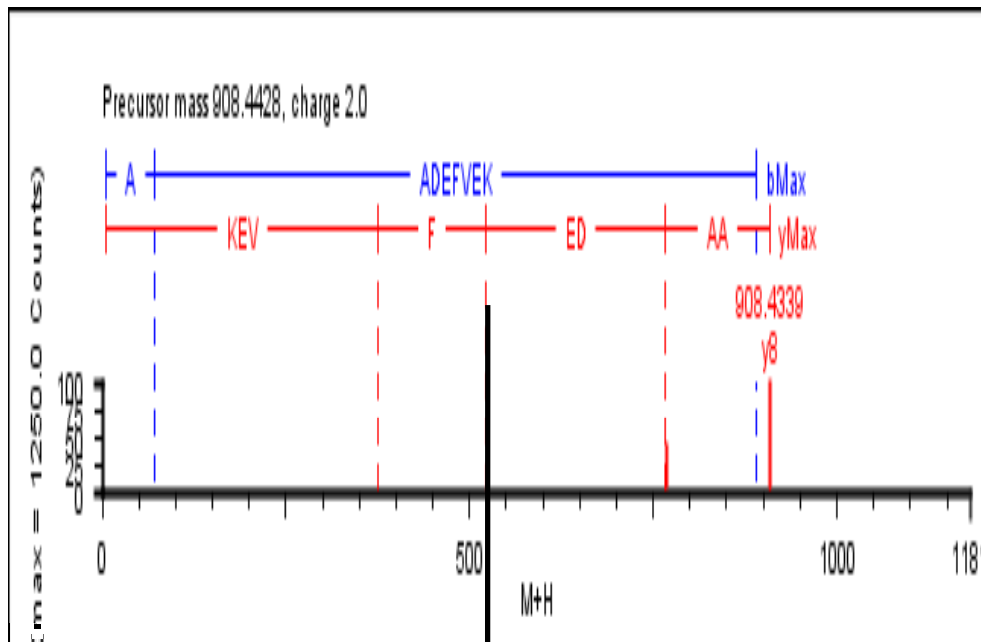

522.3075

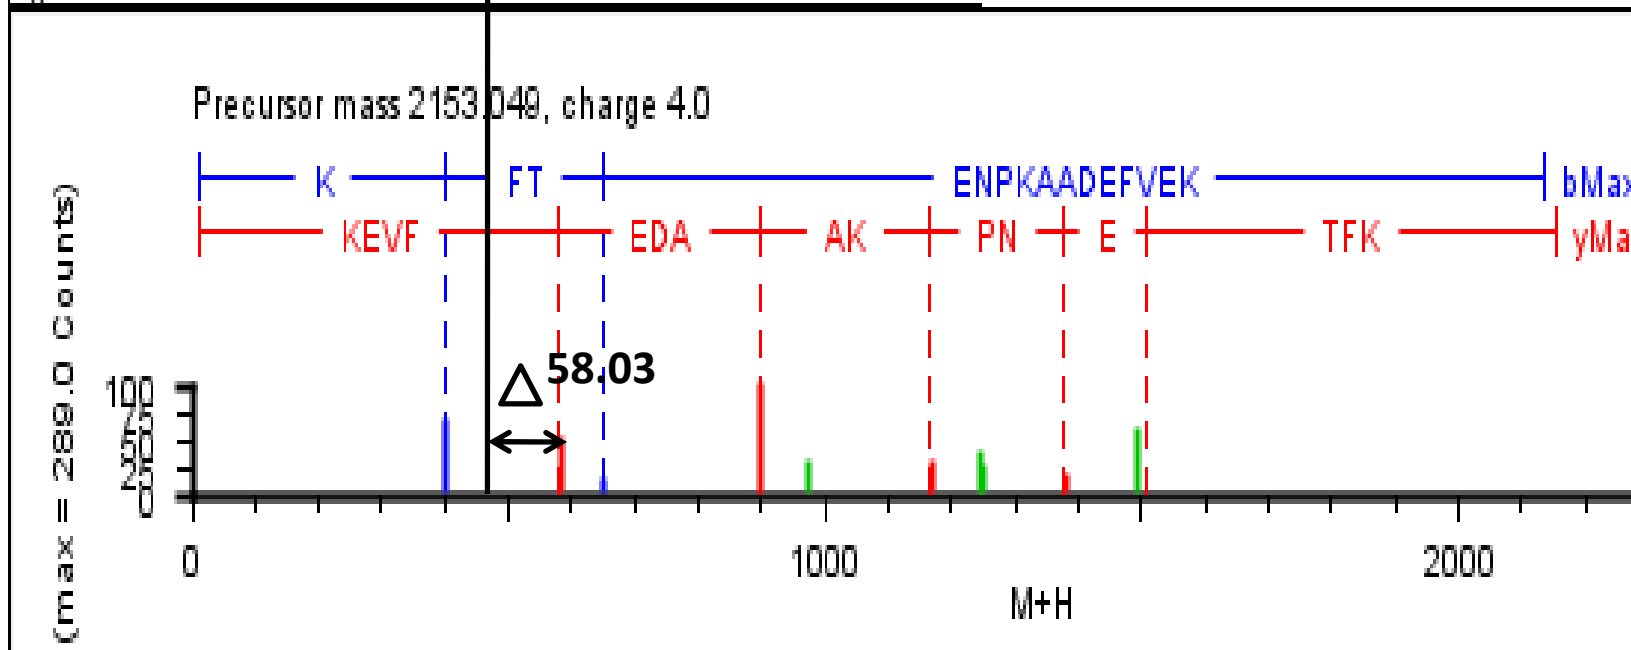

580.2976:  
(522.30+  
58.03)

81-95

(K)KFTENPKAADEFVEK(Pento)(T)

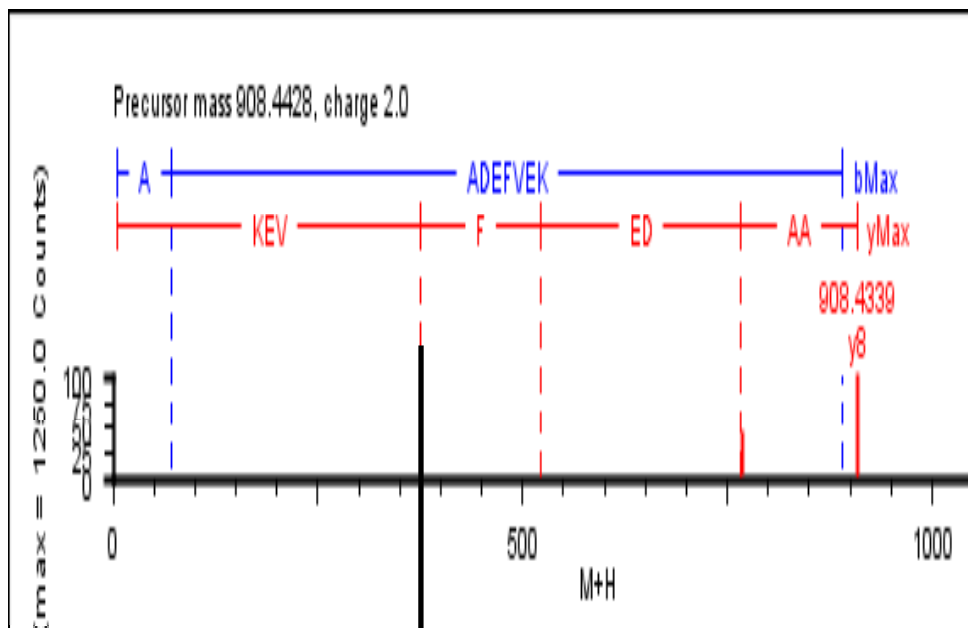

375.2369

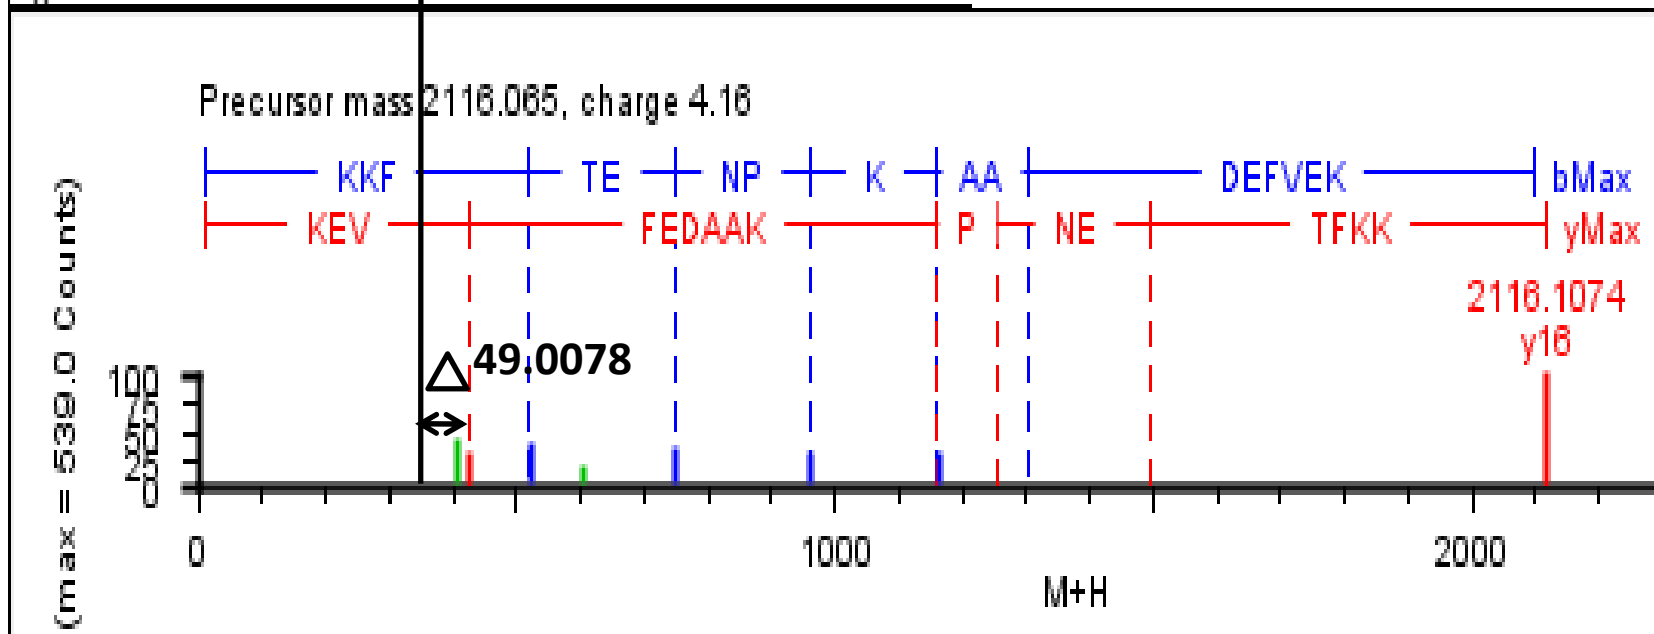

424.2409:  
(375.23+  
49.00)

80-95

(K)KKFTENPKAADEFVEK(MOLD)(T)



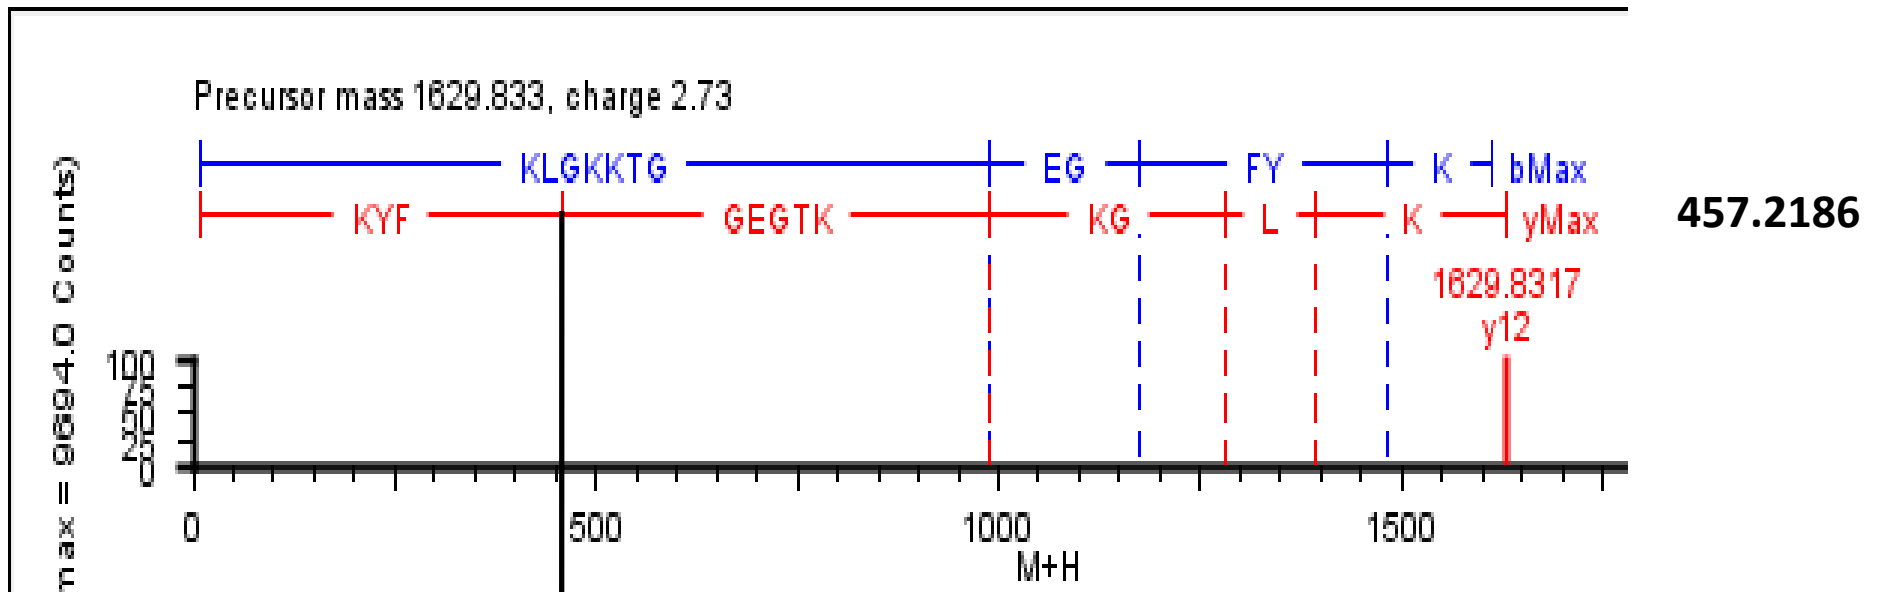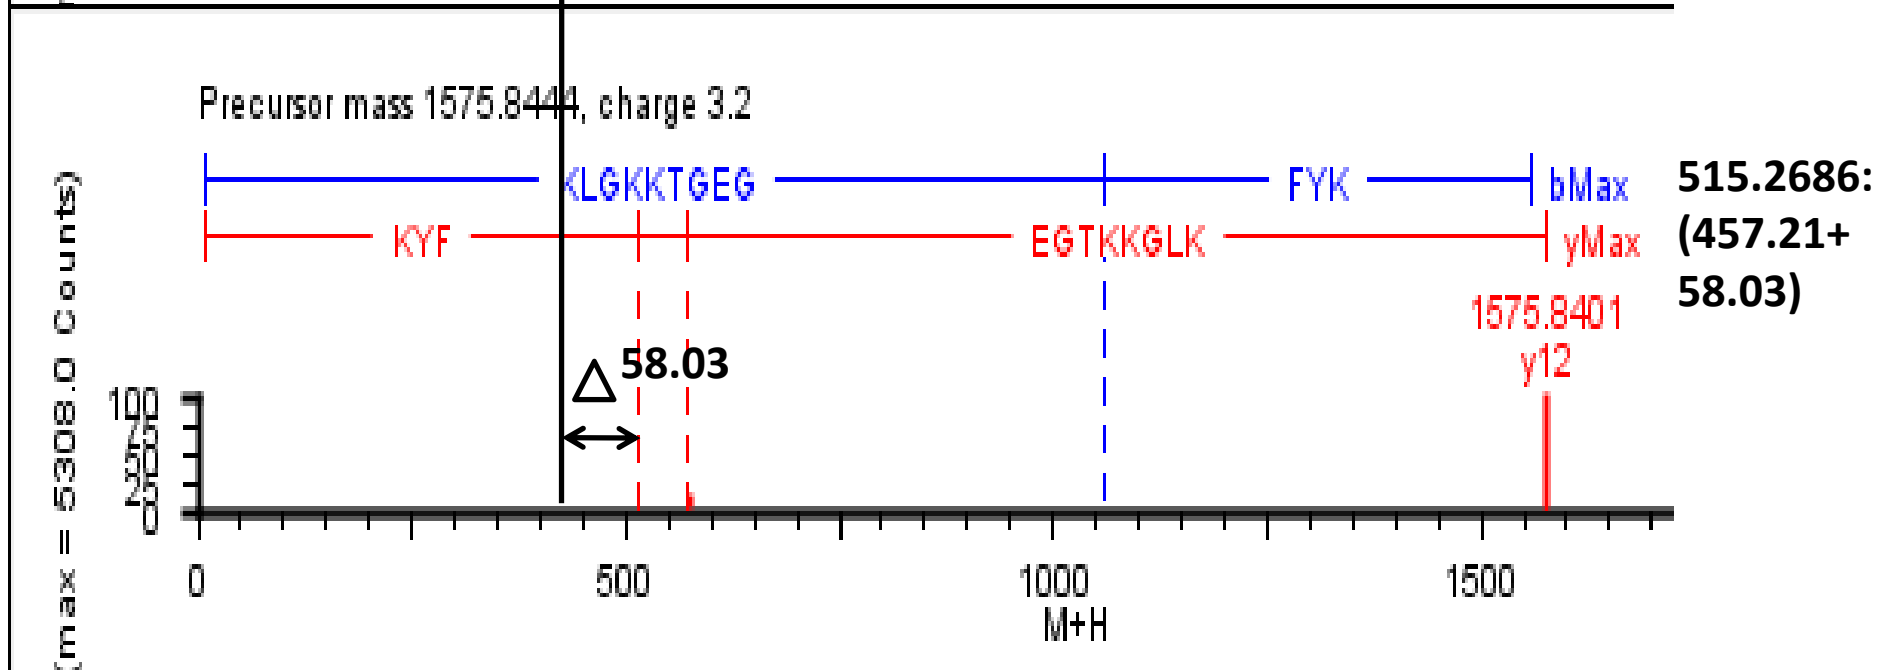

301-312

(K)KLGKKTGEGFYK(Pento)(Y)

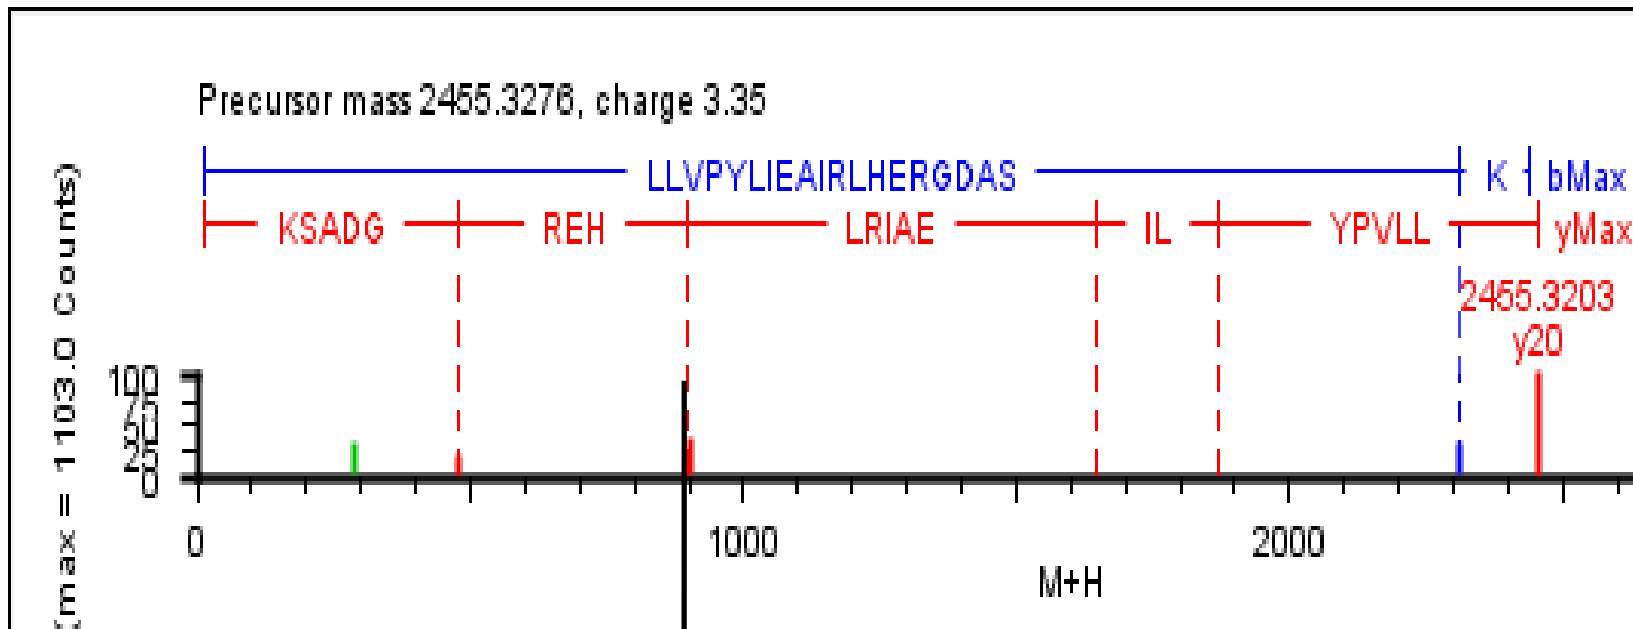

899.45

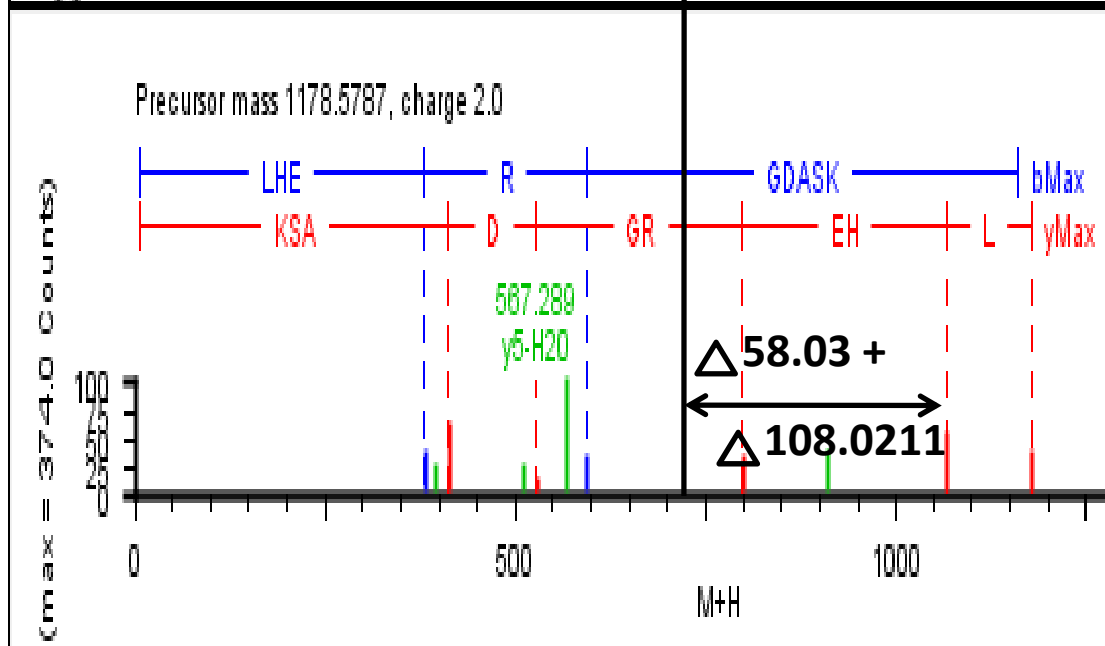

1065: (899.45-  
58.03+ 108.  
0211)

233-241

(R)LHER(Pento)GDASK(Pyr)(E)

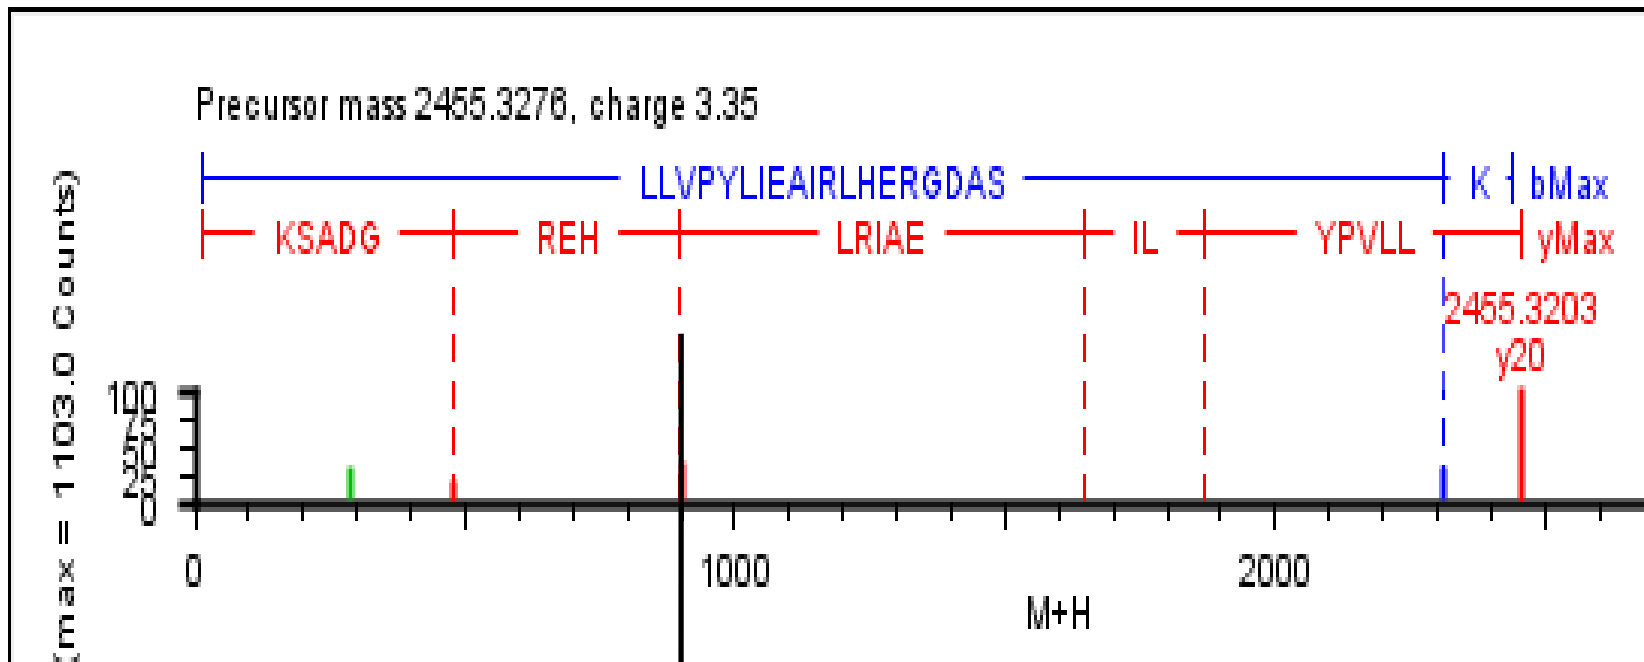

899.45

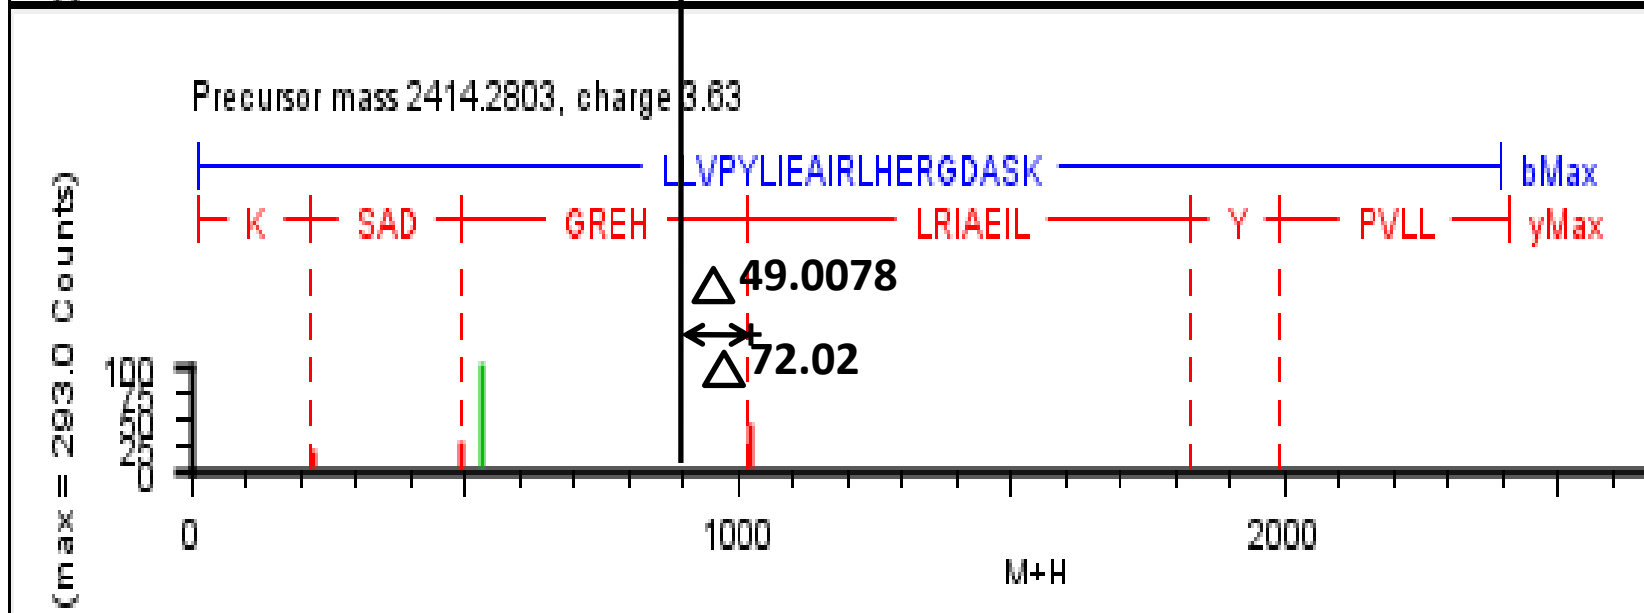

1020.5551:  
(899.45+  
49.00+ 72.02)

222-241

(R)LLVPYLIEAIRLHER(MOLD)GDASK(CEL)(E)

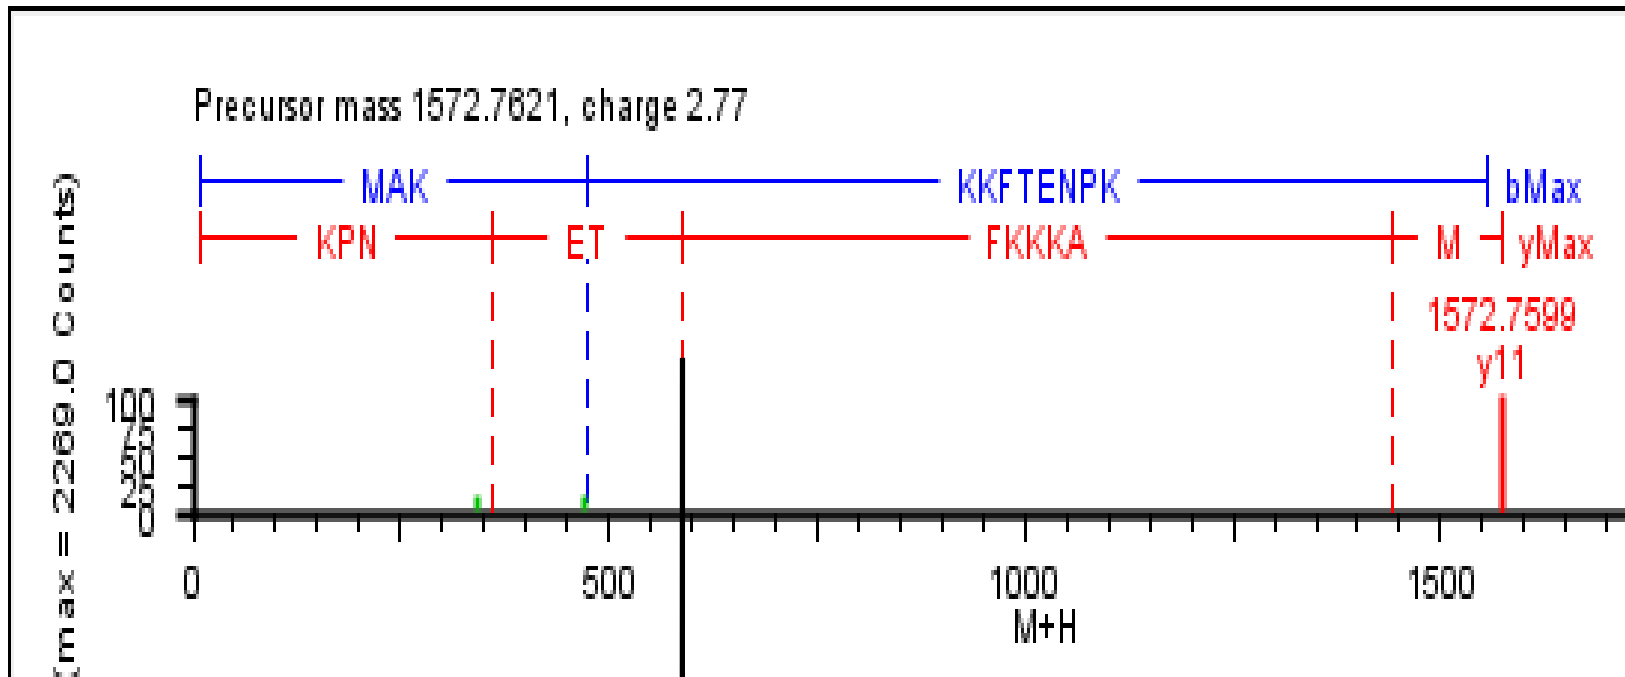

588.3188

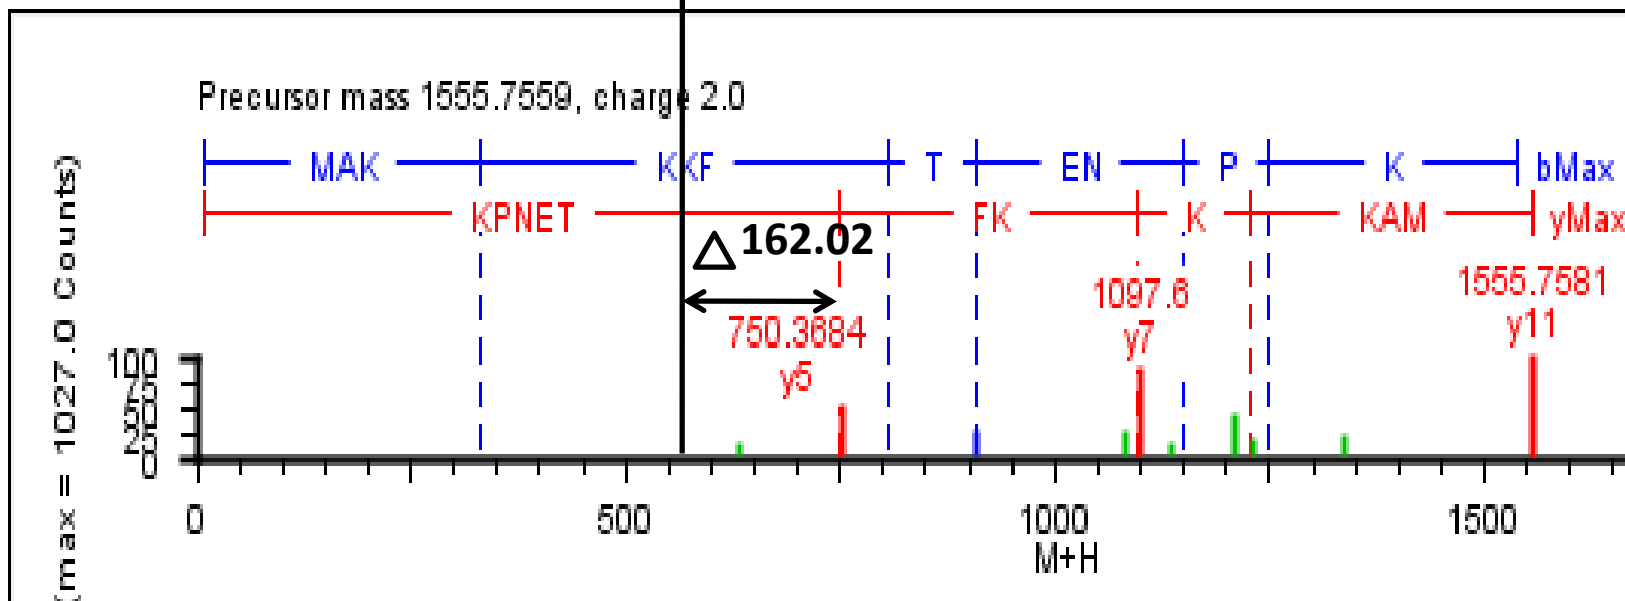

750.3684:  
(588.32+  
162.02)

77-87

(R)MAK**K**KFTENPK(Gly)(A)

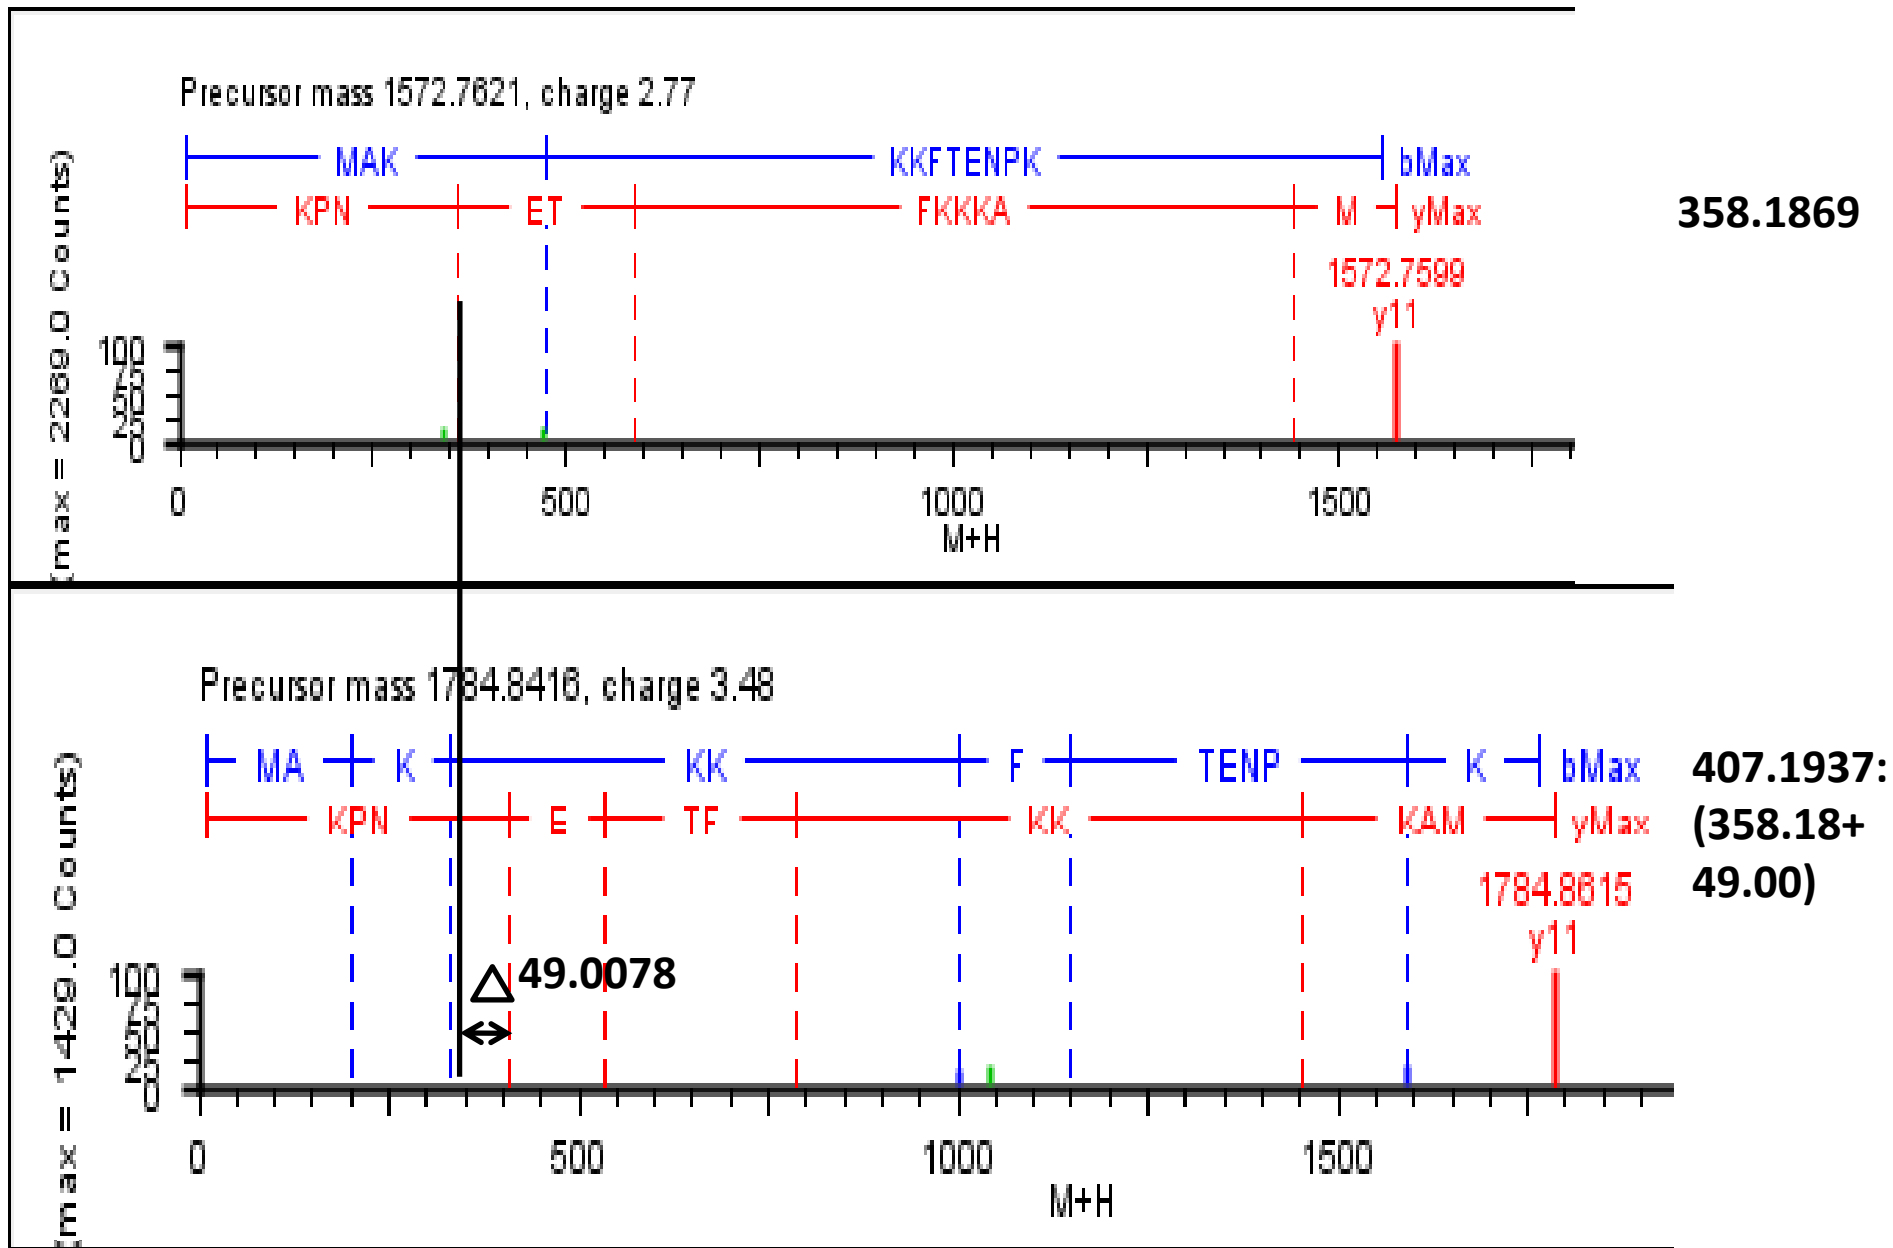

77-87

(R)MAKKFTENPK(MOLD)(A)

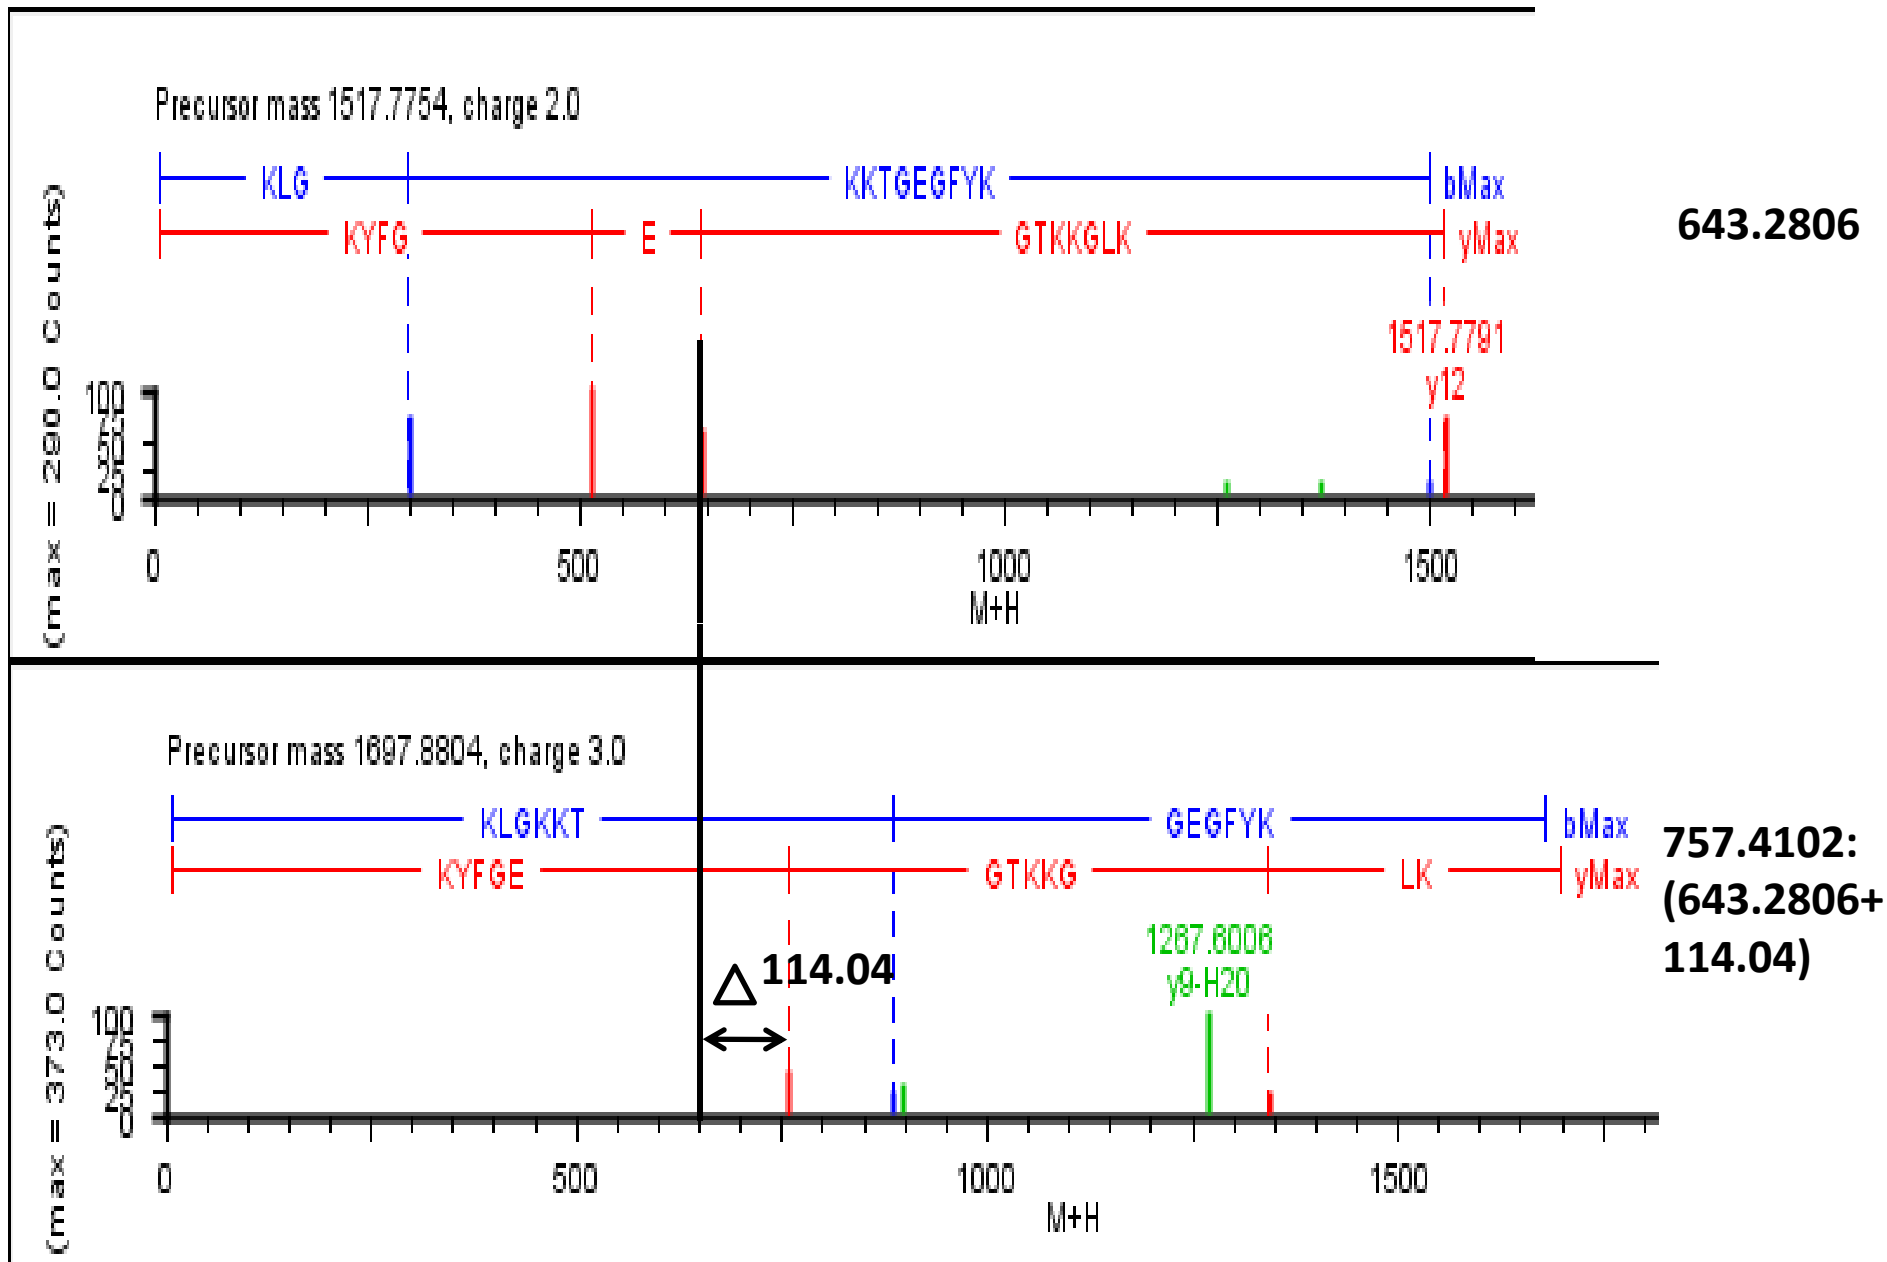

301-312

(K)KLGKKTGEGFYK(Ubi)(Y)

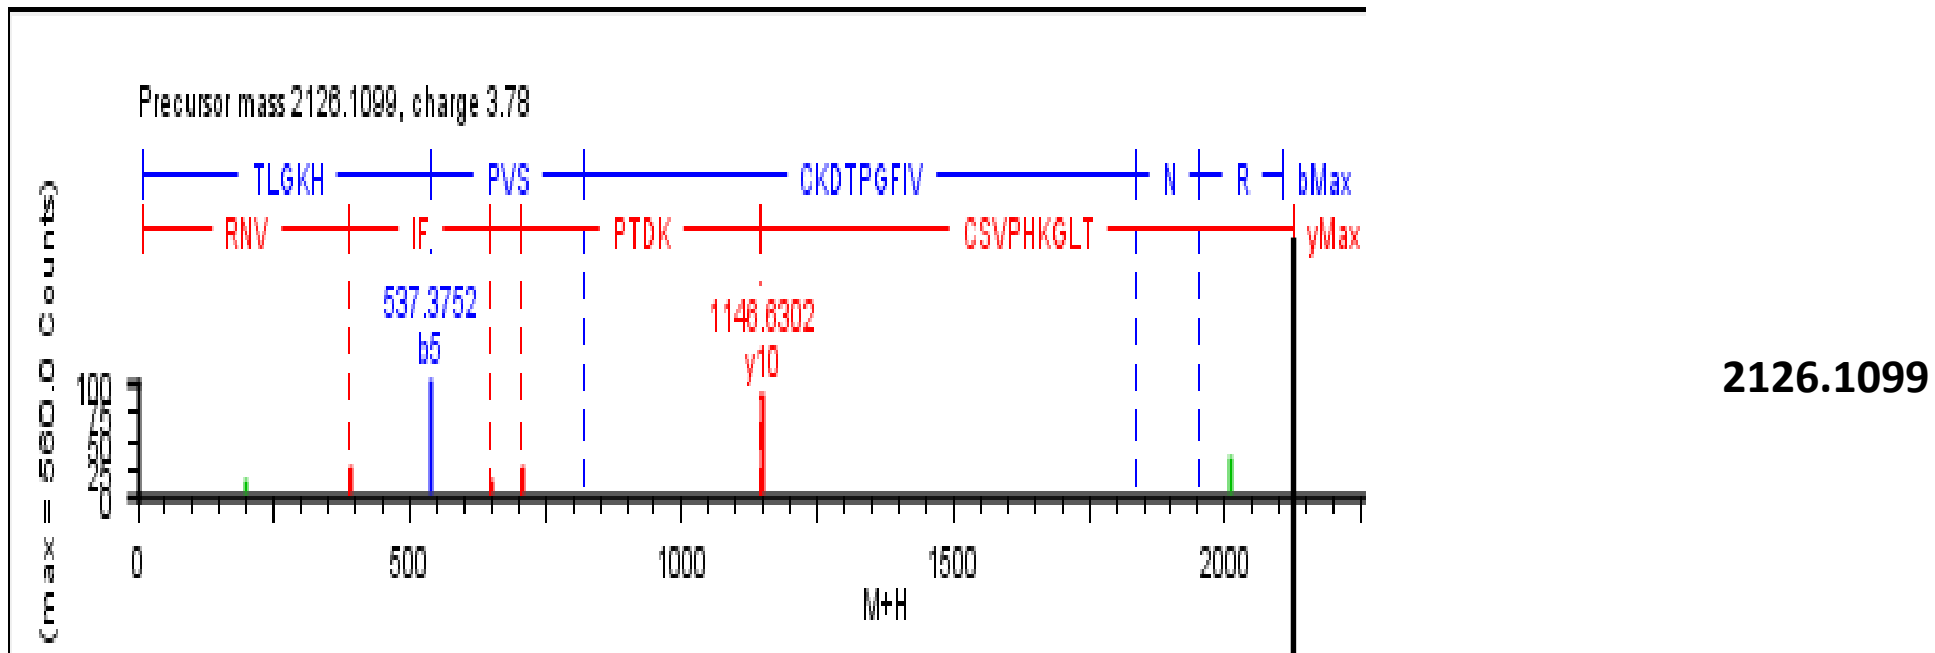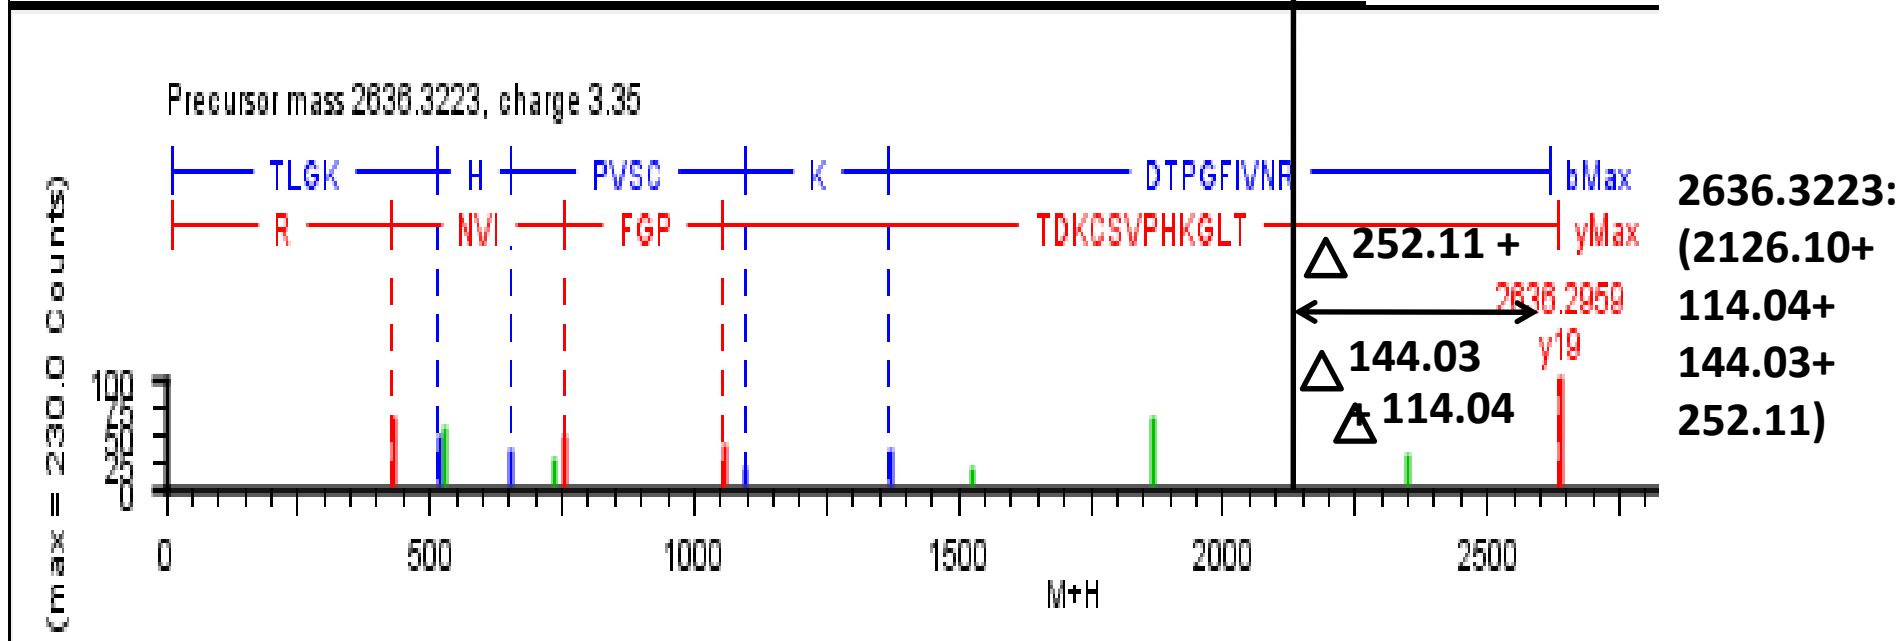

203-221

(K)TLGK(Ubi)HPVSCK(ImiA)DTPGFIVNR(Crossline)(L)

Tubulin



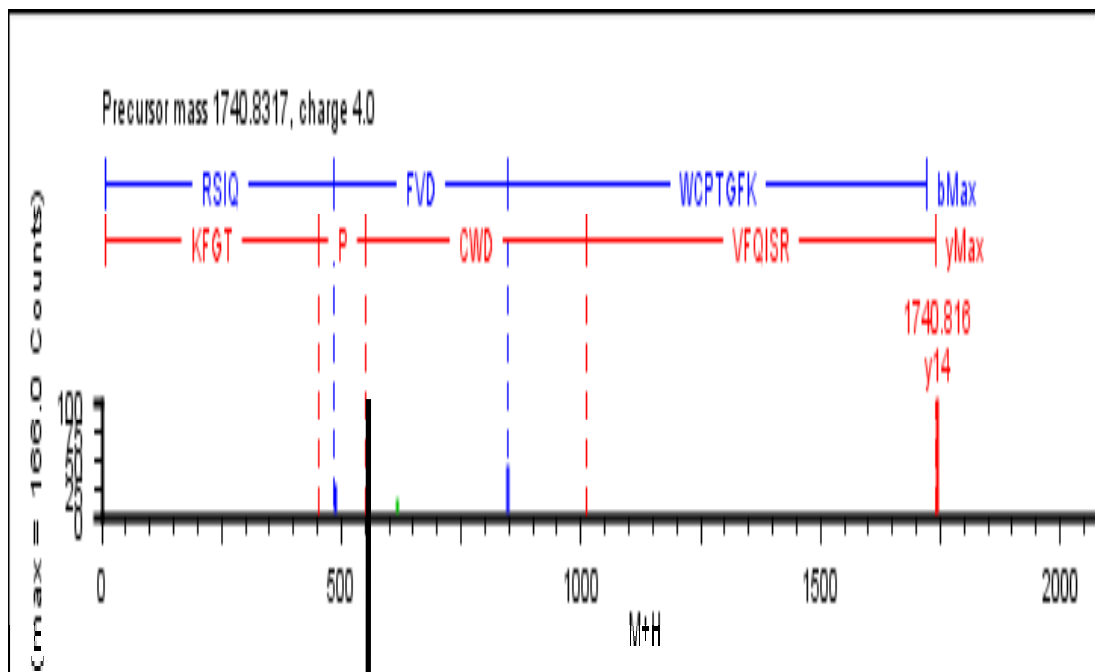

452.2536

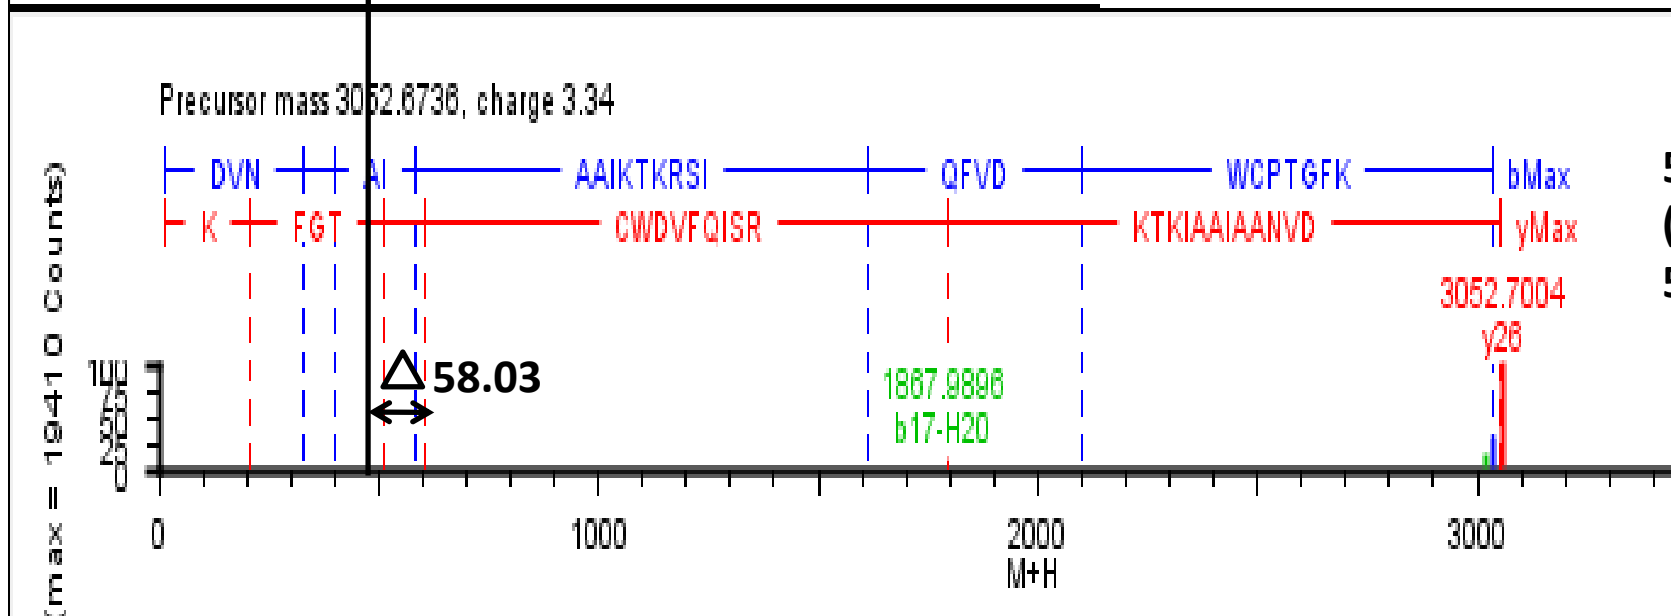

510.3215:  
(452.25+  
58.03)

327-352

(K)DVNAAIAAIKTKRSIQFVDWCPTGFK(Pento)(V)

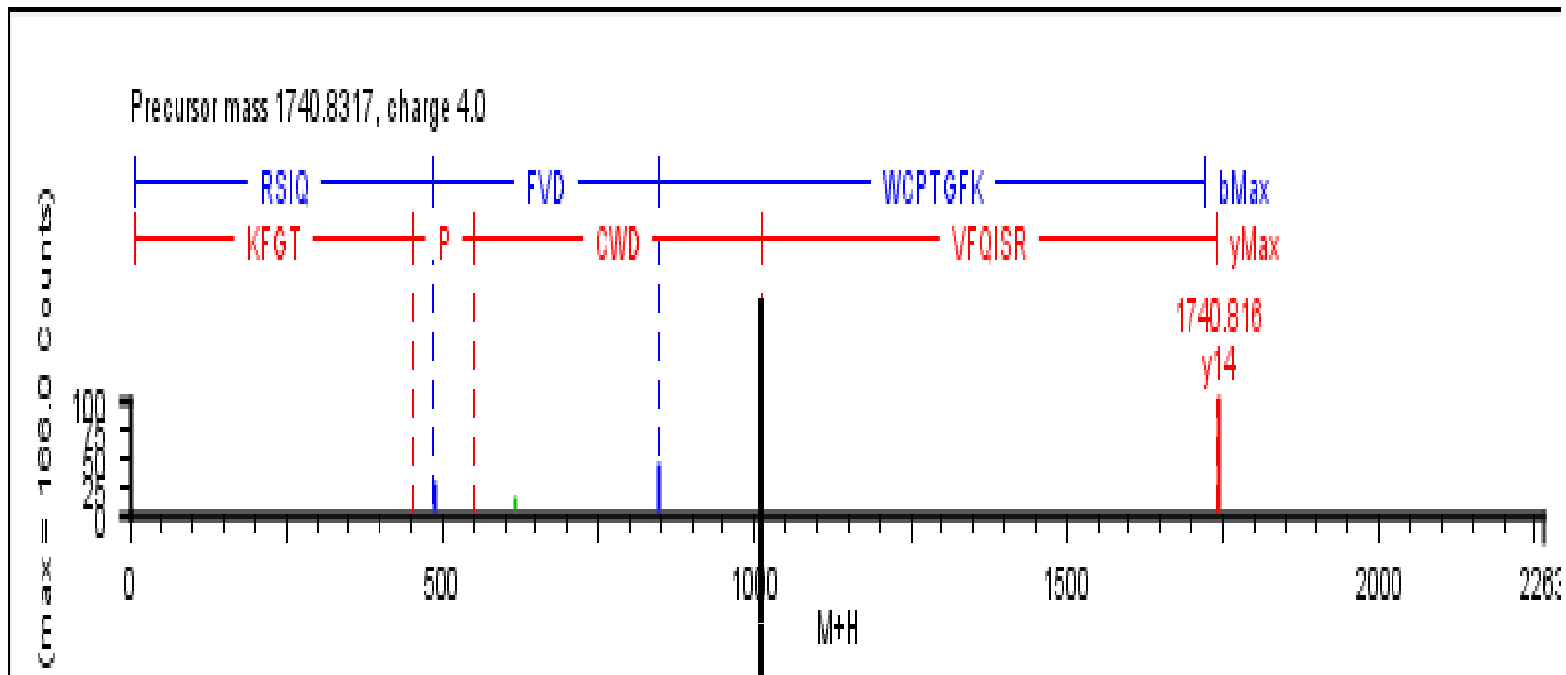

1010.3488

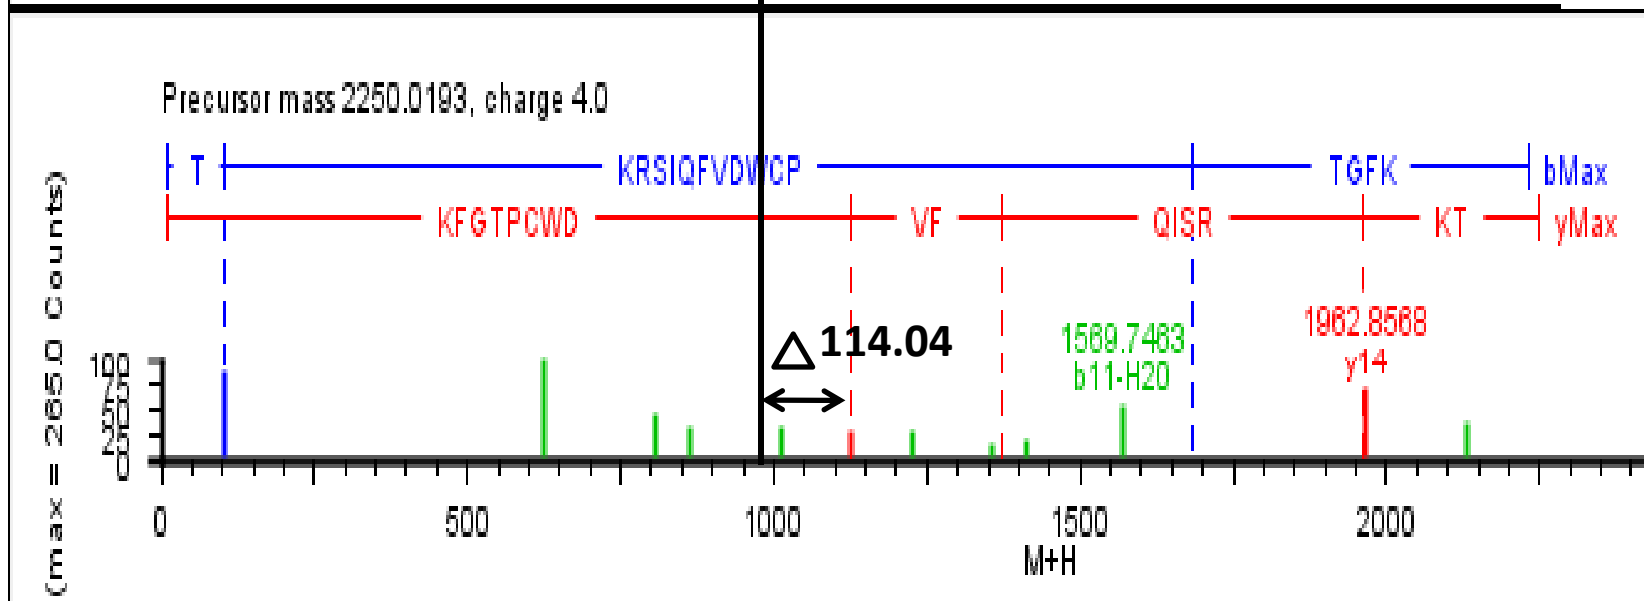

1124.4255:  
(1010.34+  
114.04)

337-352

(K)TKRSIQFVDWCPTGFK(Ubi)(V)

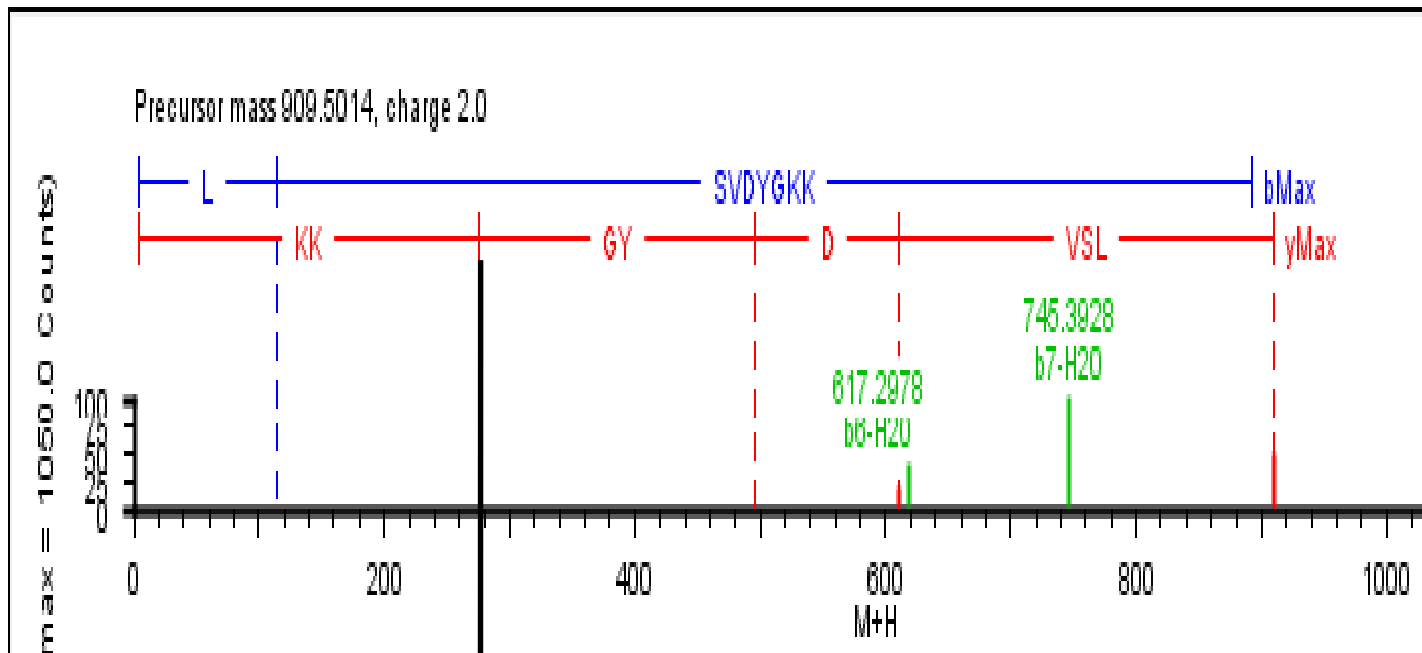

275.2047

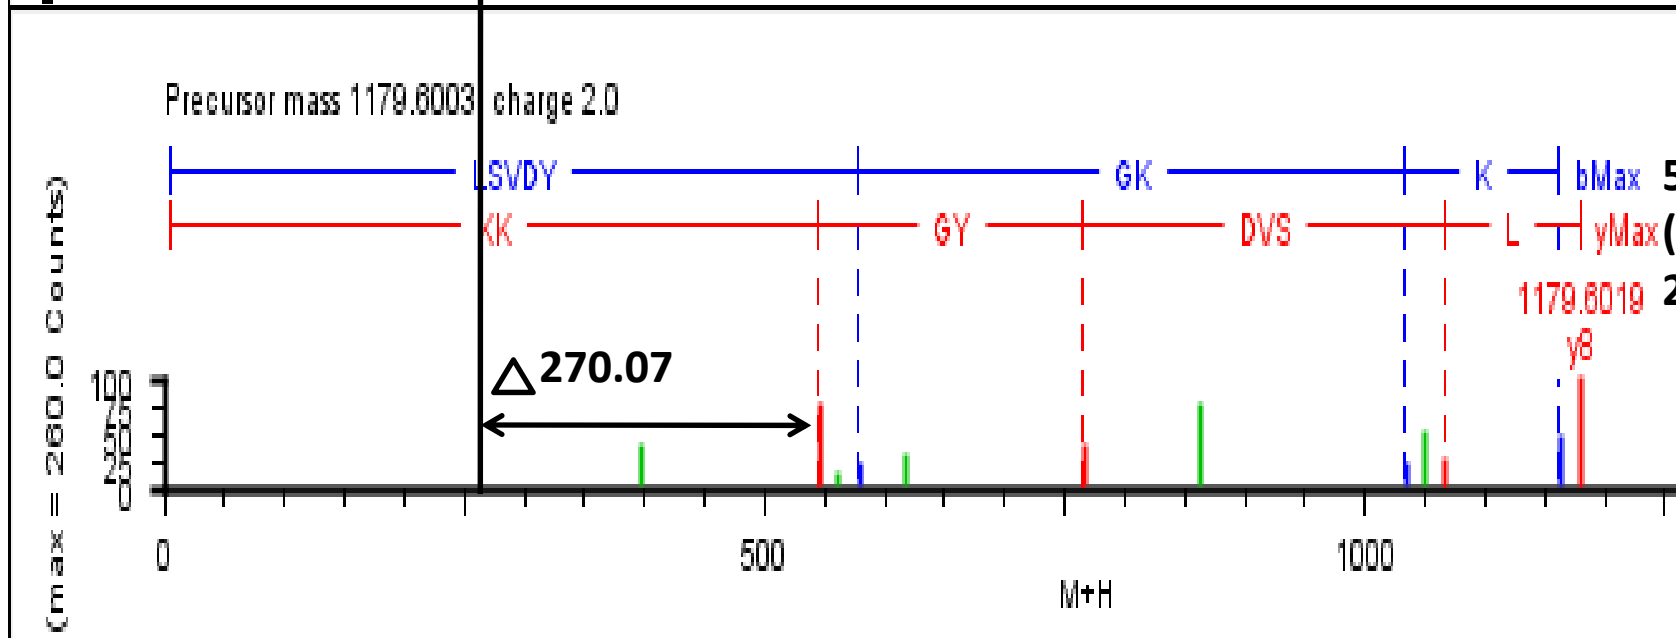

545.2849:  
(275.20+  
270.07)

157-164

(R)LSVDYGK(AFGP)K(S)

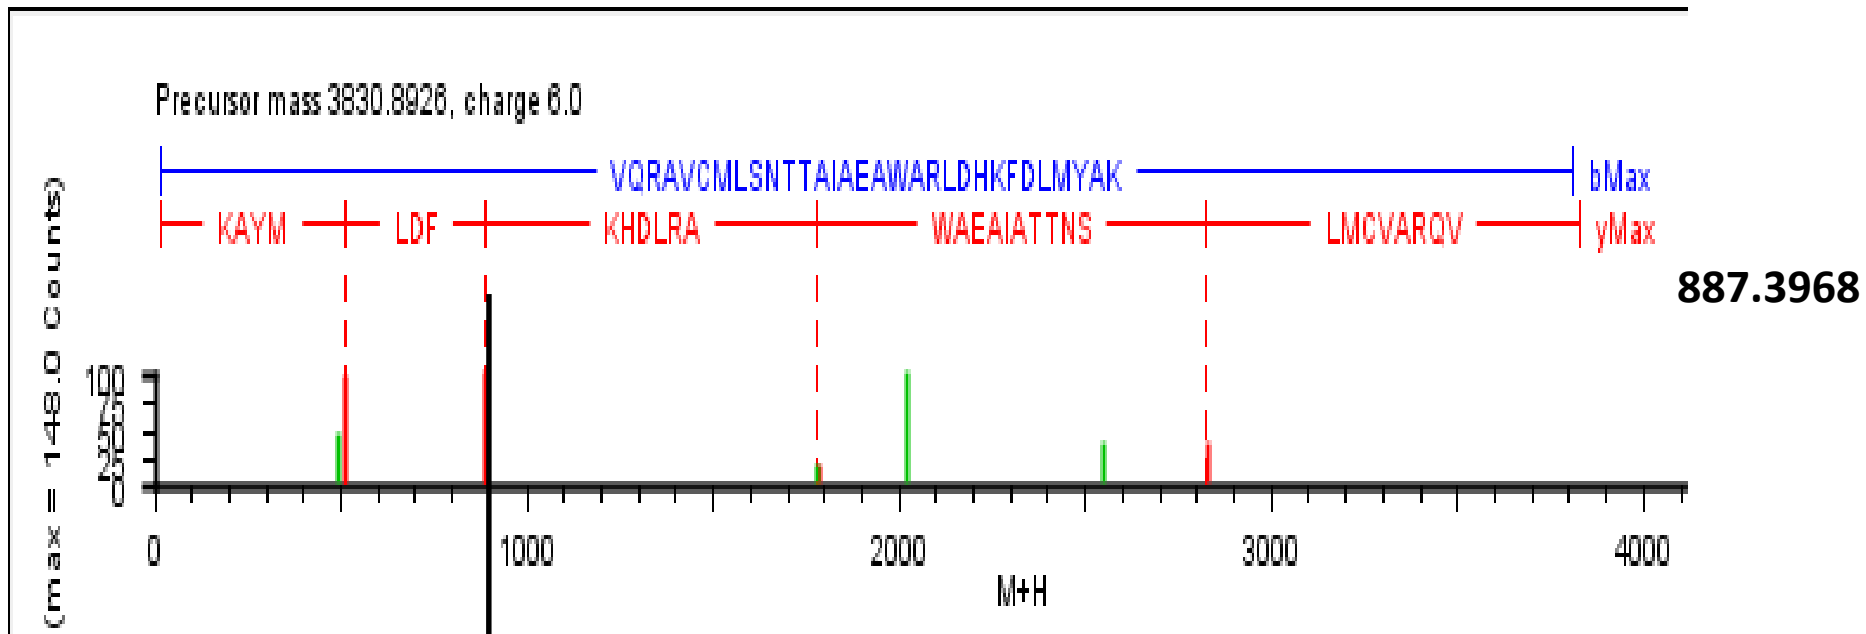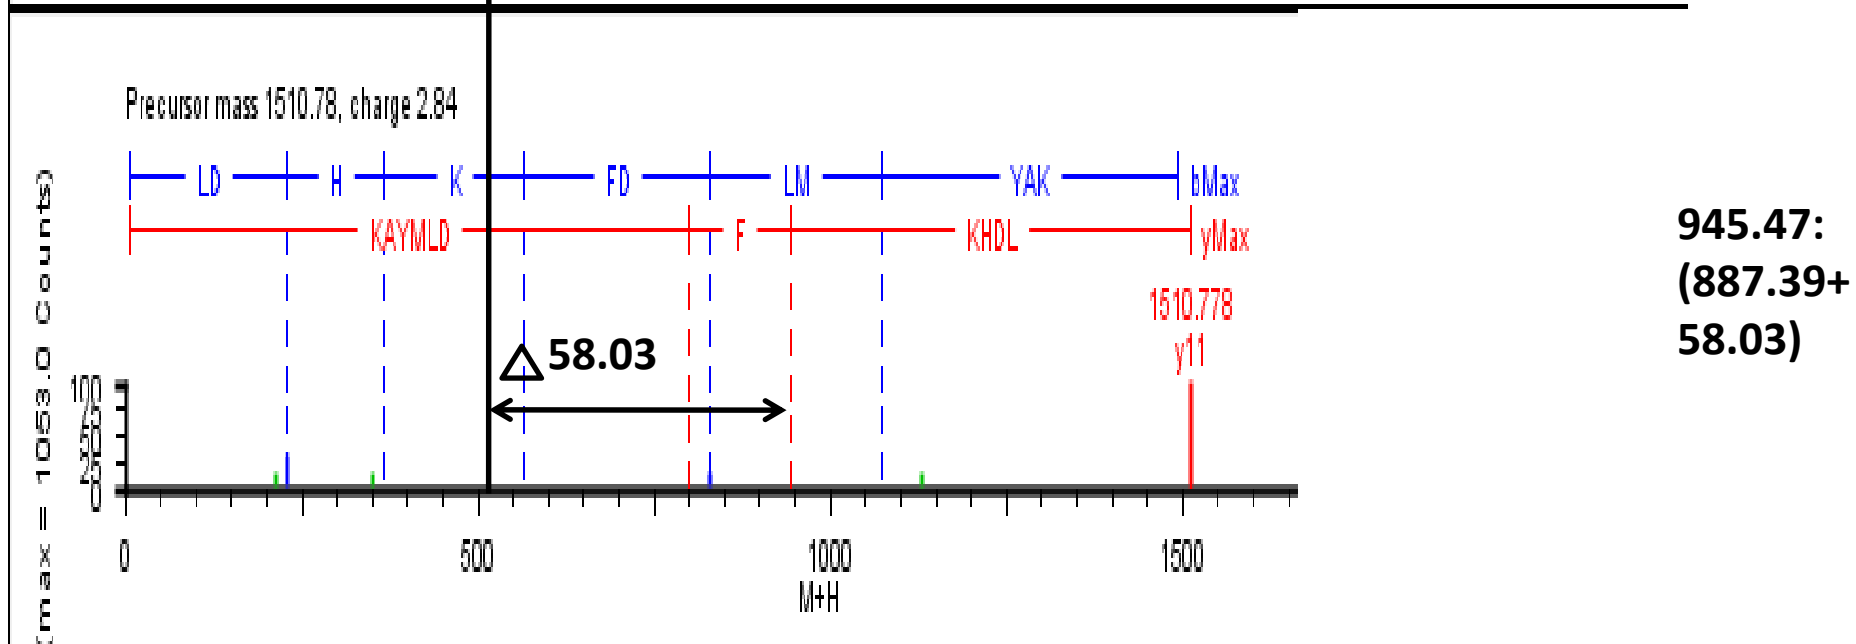

391-401

(R)LDHKFDLMYAK(Pento)(R)

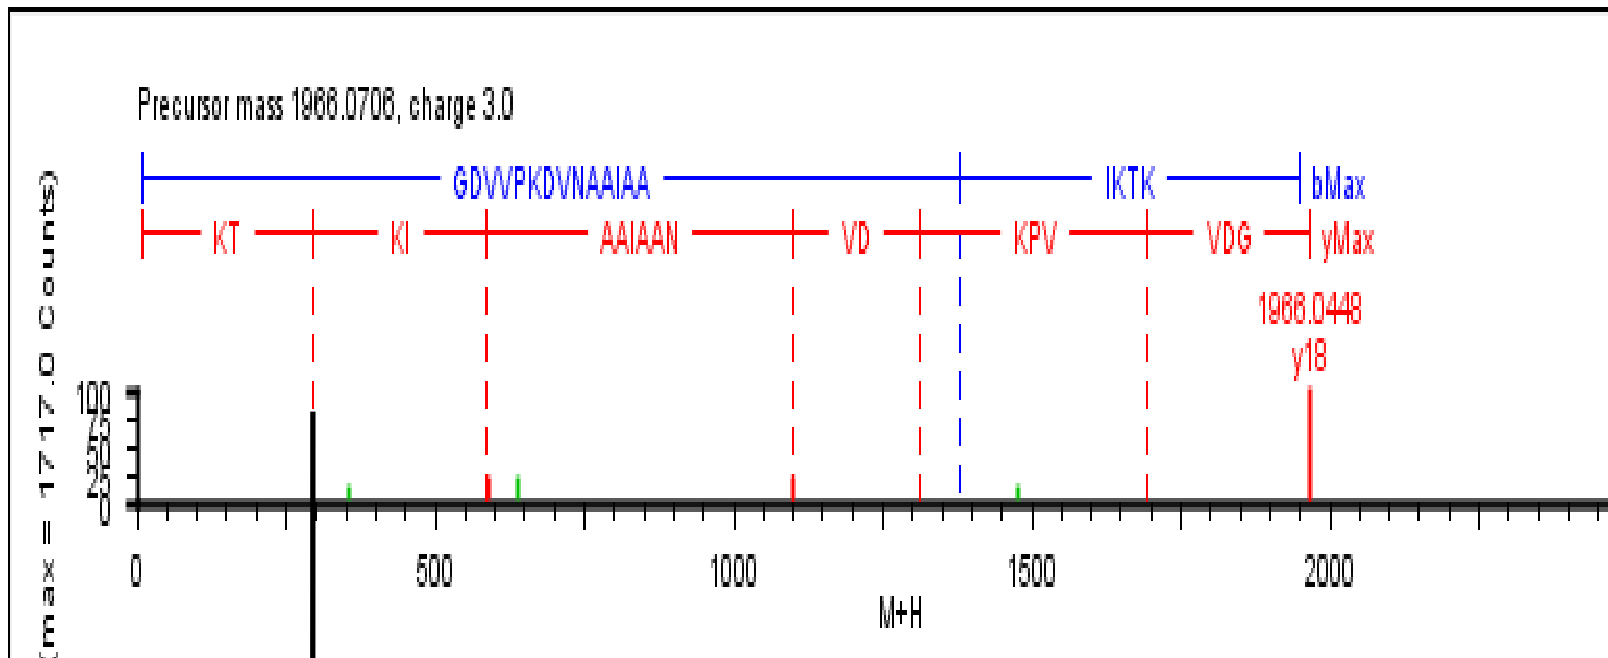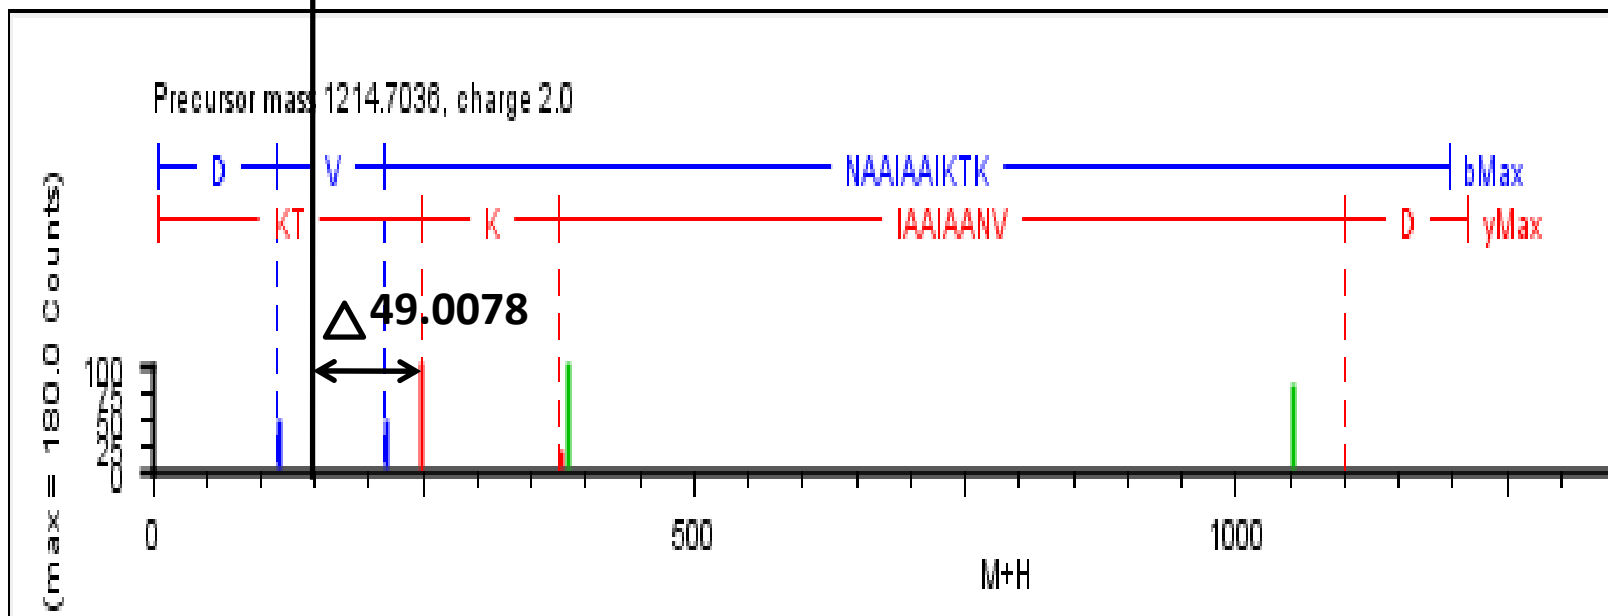

321-338

(R)GDVVPKDVNAAIAAIK**K(MOLD)**(R)

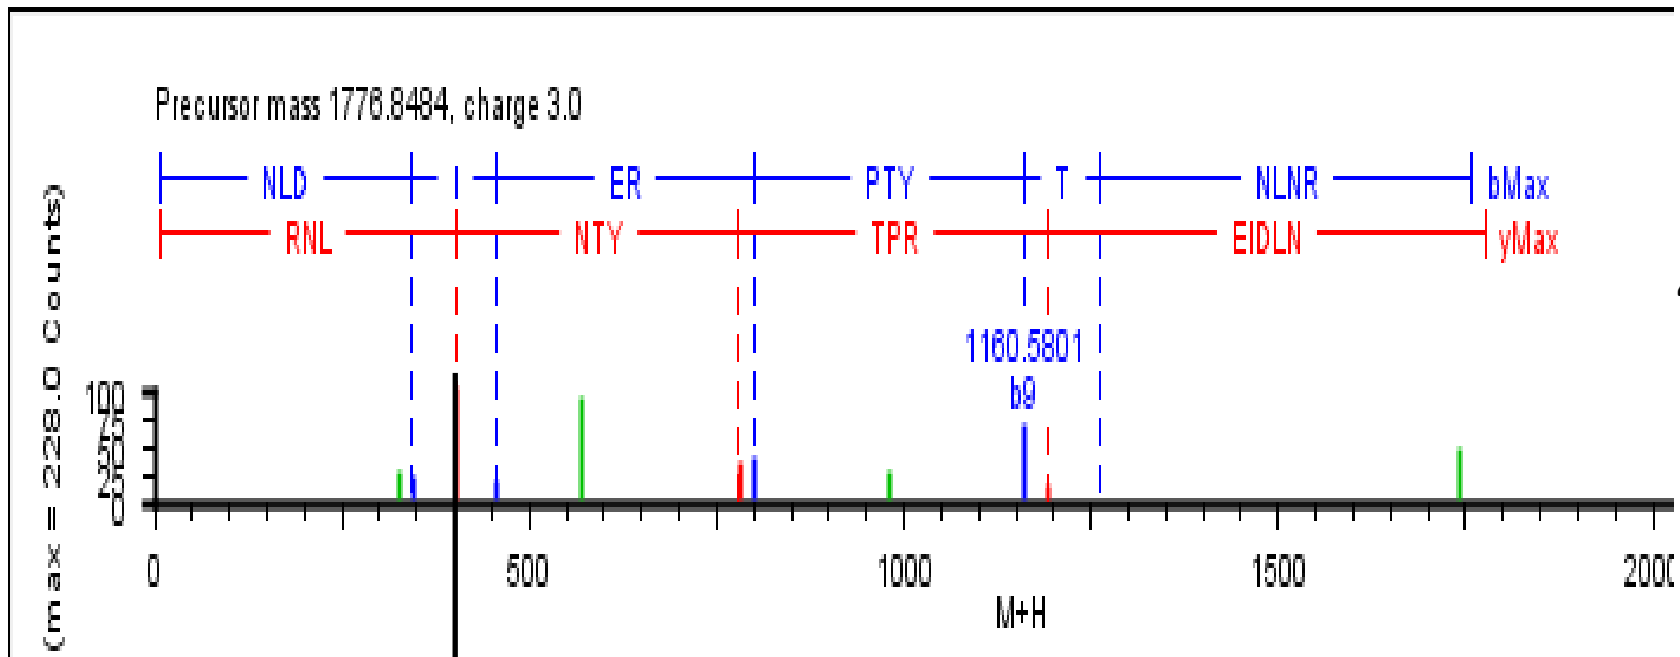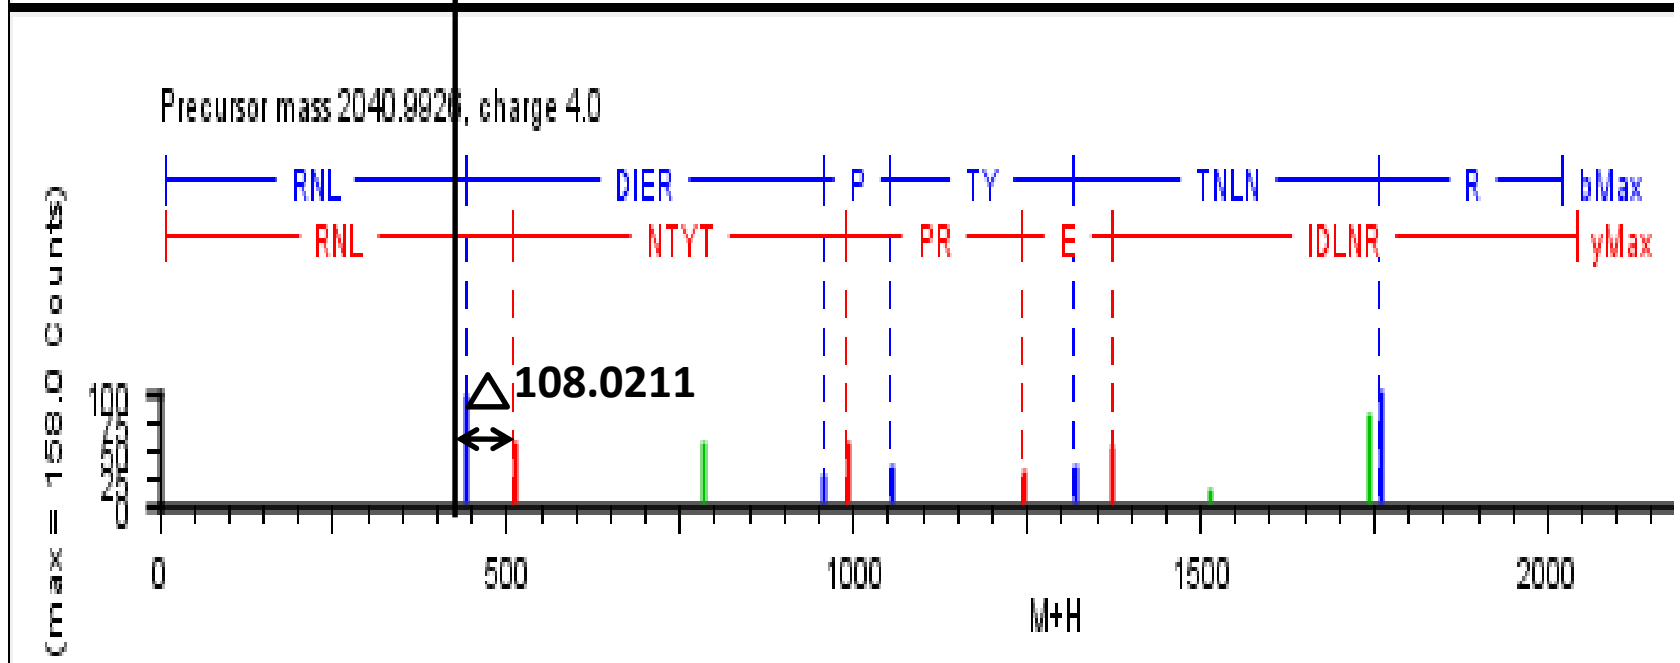

215-229

(R)RNLDIERPTYTNLNR(Pyr)(L)

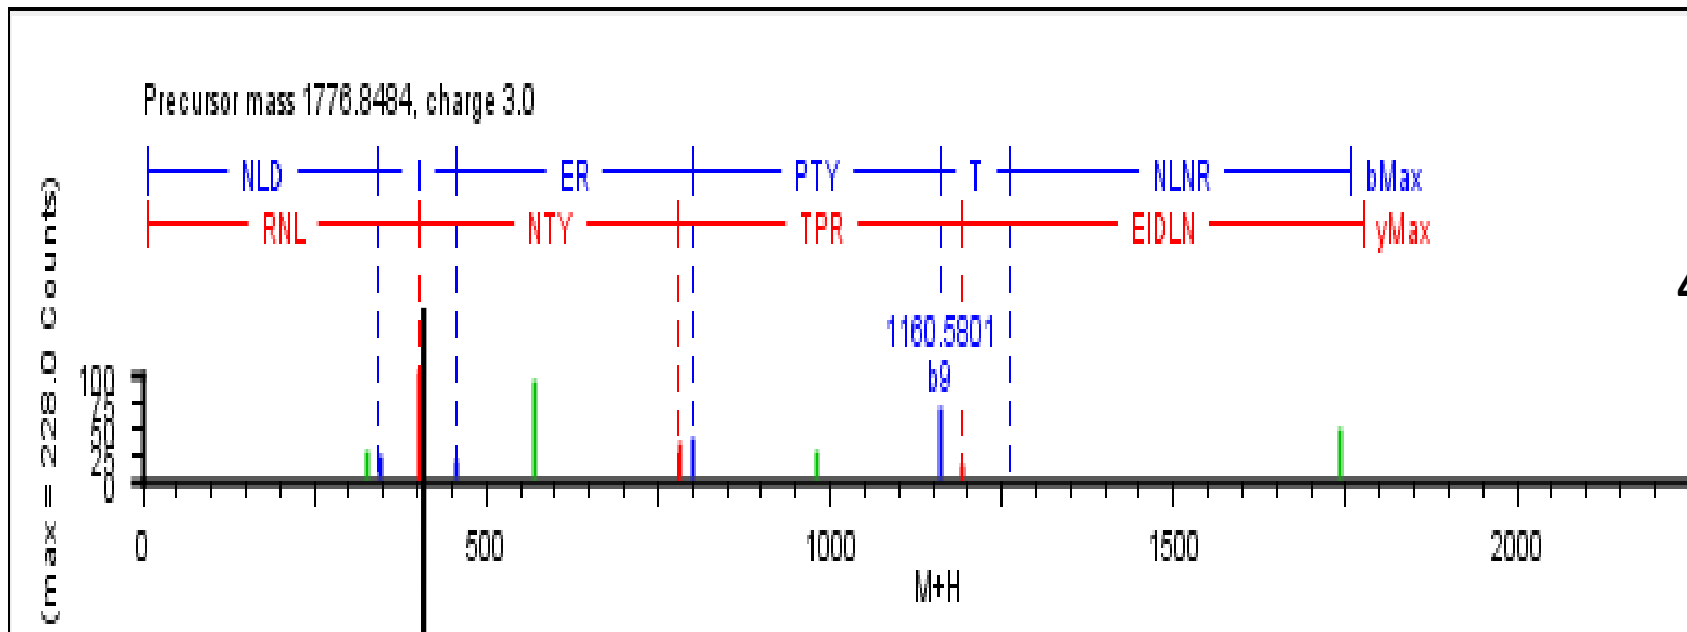

402.2711

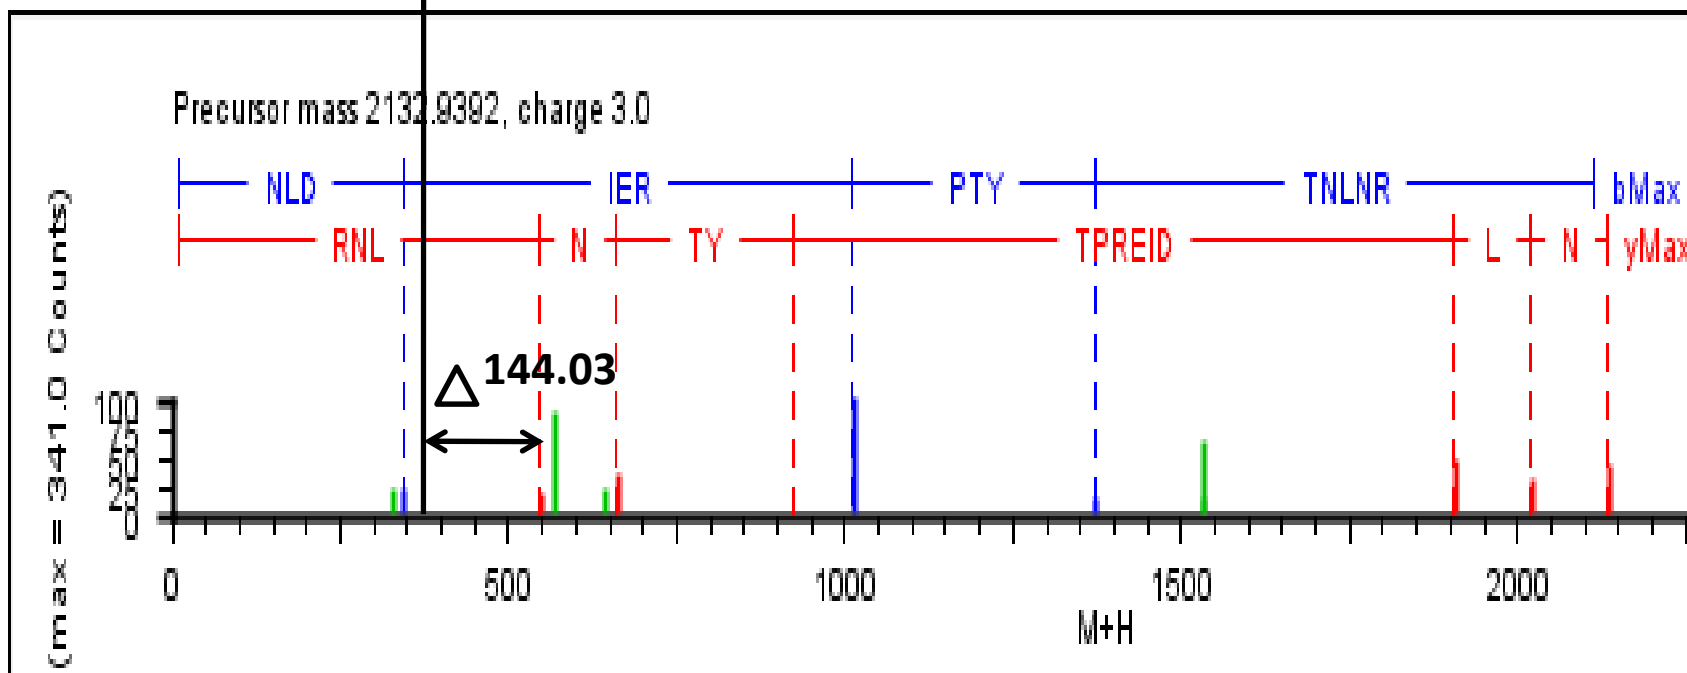

546.2747:  
(402.27+  
144.03)

216-229

(R)NLDIERPTYTNLNR(ImiA)(L)

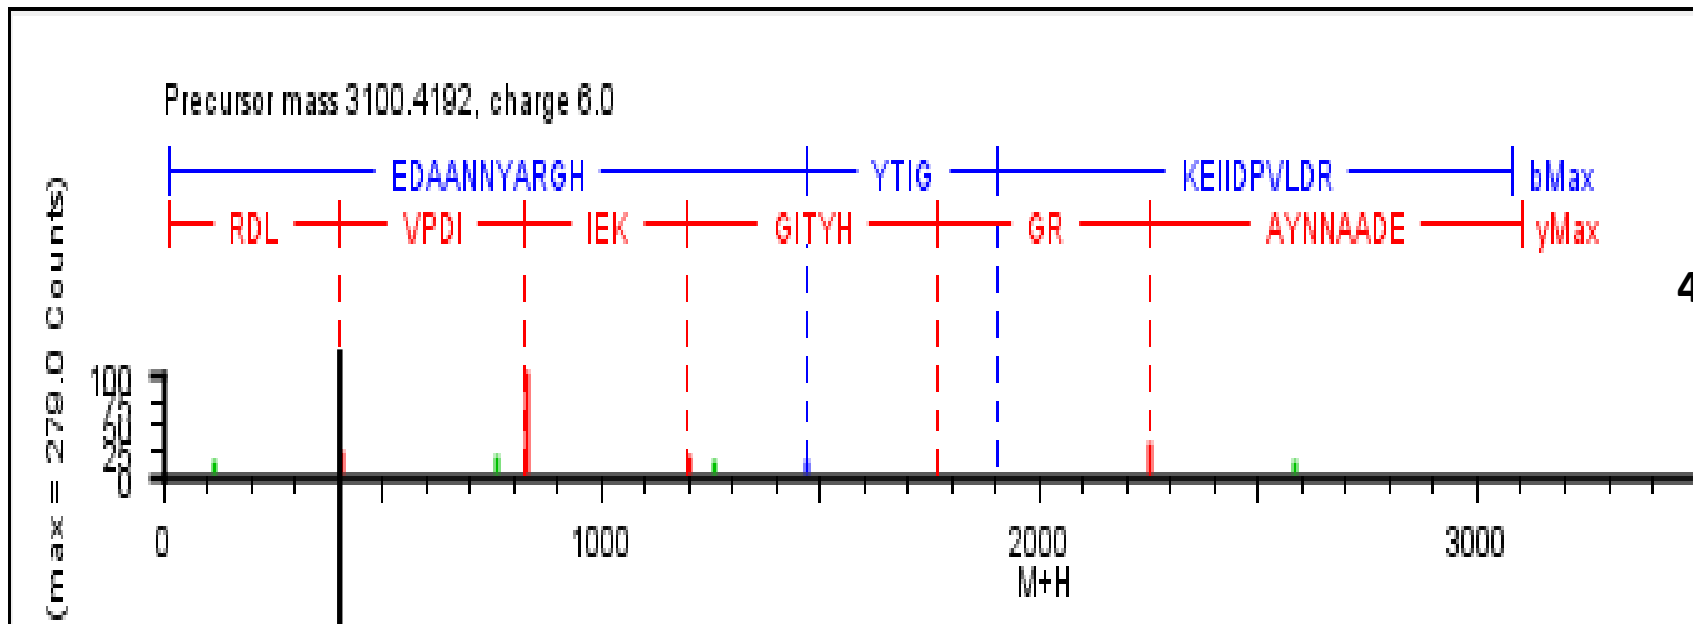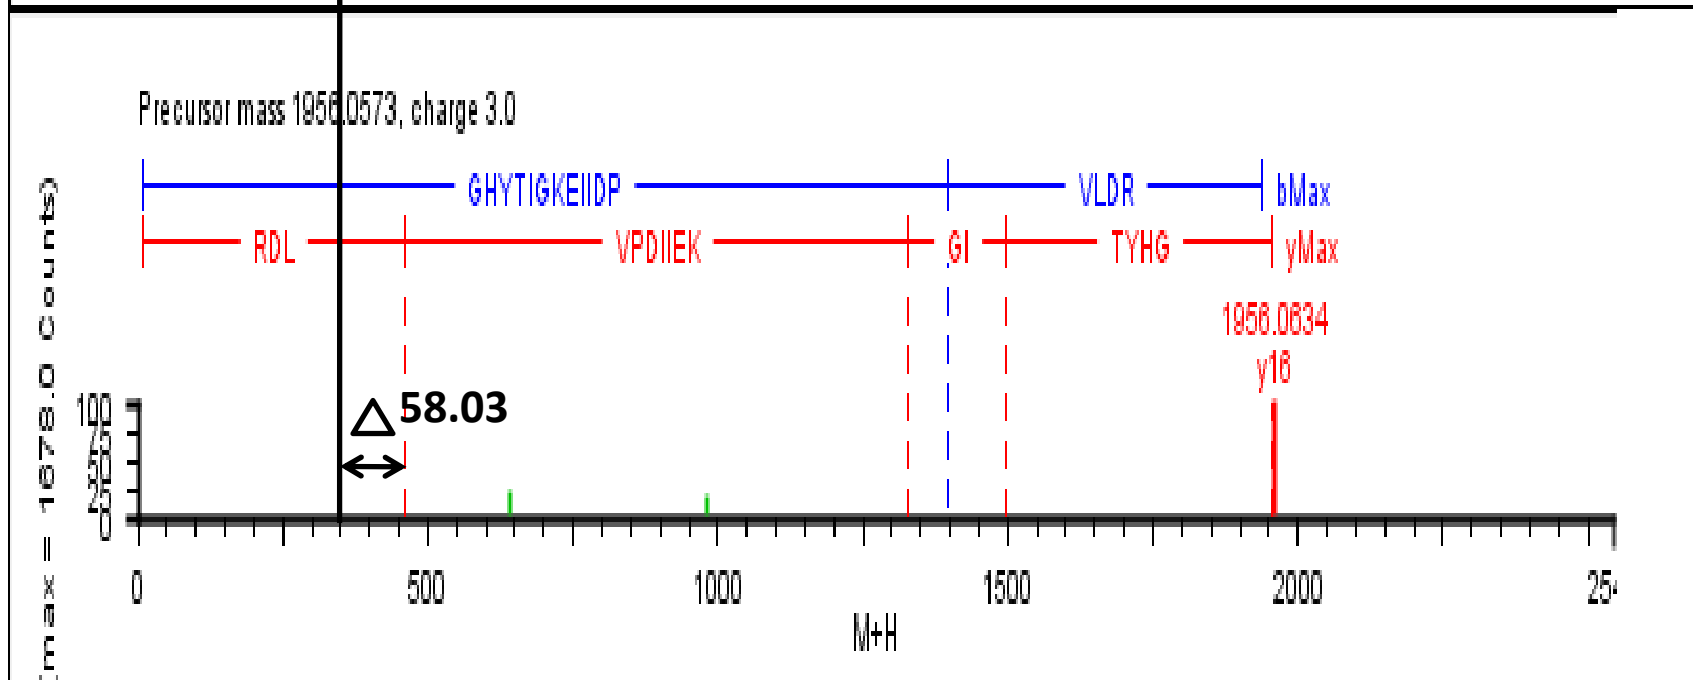

403.2225

461.29:  
(403.22+  
58.03)

106-121

(R)GHYTIGKEIDPVLDR(Pento)(I)



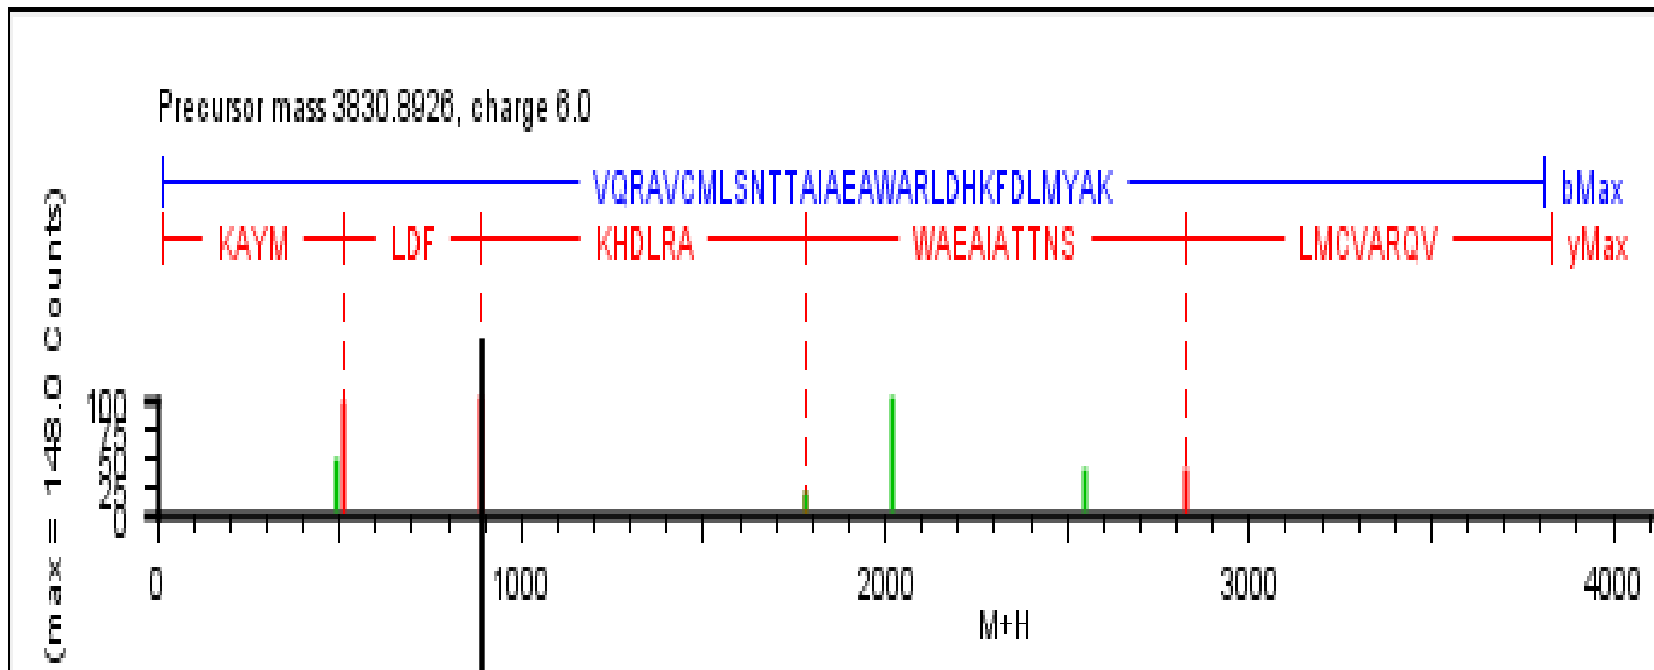

887.3968

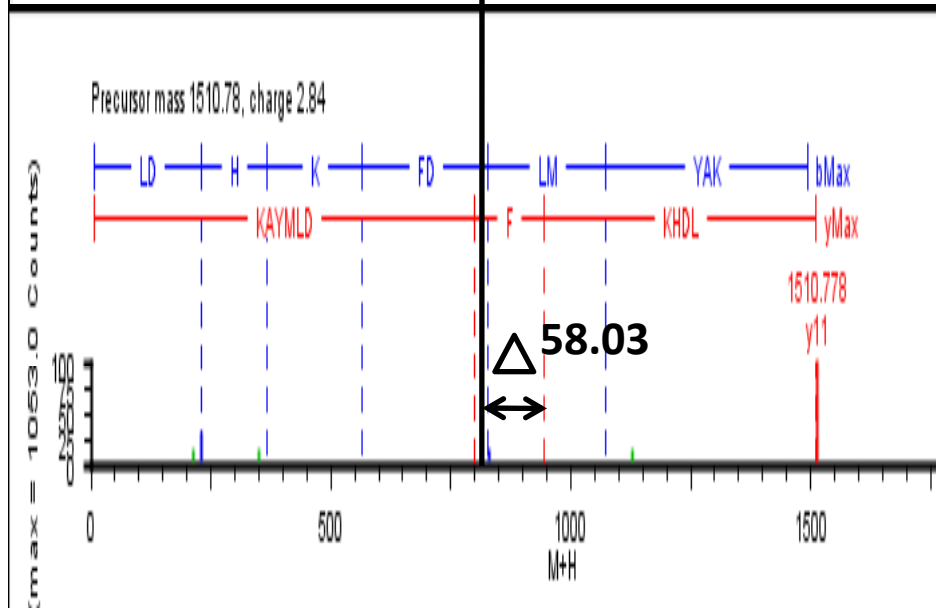

945.47:  
(887.39+  
58.03)

391-401

(R)LDHKFDLMYAK(Pento)(R)
