# Supplementary material
Source: PubMed Central journal article supplement (PMC3536903)

**Supplemental Fig. S2: Gene expression analysis of Beta-actin (House keeping gene) by semi-quantitative RT-PCR**

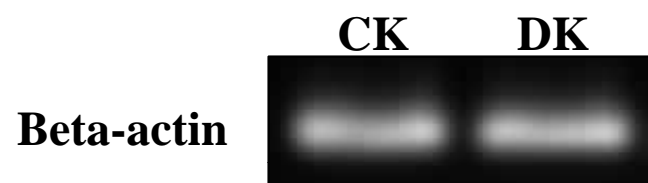

Supplement: supp_M112.020651_mcp.M112.020651-3.pdf [file supp_M112.020651_mcp.M112.020651-3.pdf]
