# Supplementary material
Source: PubMed Central journal article supplement (PMC3536903)
Supplement: supp_M112.020651_mcp.M112.020651-4.pdf [file supp_M112.020651_mcp.M112.020651-4.pdf]

**Supplemental table S1: Primers for semi-quantitative RT-PCR.**

| <b>Primer name</b> | <b>Primer Sequence 5'-3'</b>                          | <b>Gene bank Acc. No.</b> | <b>Gene name</b>                          |
|--------------------|-------------------------------------------------------|---------------------------|-------------------------------------------|
| <b>BA</b>          | F: ATGGCCACTGCCGCATCCTCT<br>R: AGAGCCTCGGGGCATCGGAAC  | BC063166.1                | Beta actin                                |
| <b>ATPA</b>        | F: AAGGCATCCGCCCTGCCATTA<br>R: CATGGTGCCTGCCACCTGCTT  | NM_023093.1               | ATP synthase alpha subunit                |
| <b>HSP</b>         | F: CCCACAGTCCTTCGCCAGATGA<br>R: GCTCGAGCATCCGCACCAAAT | X54793.1                  | Heat Shock Protein                        |
| <b>GAPDH</b>       | F: CACGGCAAGTTCAACGGCACA<br>R: GCGGGATCTCGCTCCTGGAAG  | XM_001062726.2            | Glyceraldehyde 3- Phosphate Dehydrogenase |
| <b>ADH</b>         | F: TGGAGGCACTGGTGGCAAAGG<br>R: GCACCGAGGCCACACTGAGGA  | FQ213220.1                | Alcohol Dehydrogenase                     |
| <b>ICDH</b>        | F: ACACGCCCATGGCGACCAGTA<br>R: TCCTTGGCACCACCTGCCATCC | BC076398.1                | Isocitrate Dehydrogenase                  |
| <b>LDH</b>         | F: CACGGGTGGGTCCTGGGAGAG<br>R: GCCCAGCTGCGGGTTCAGAG   | BC168737.1                | Lactate Dehydrogenase                     |
| <b>Mn-SOD</b>      | F: GTTCAGGCTGGGGCTGGCTTG<br>R: GGCCTGTGGTTCCTTGCAGTGG | Y00497.1                  | Soperoxide Dismutase                      |
| <b>ATPB</b>        | F: CCAGCTGTGGATCCGCTGGAC<br>R: TTGCACCCACGAGCAACATC   | M19044.1                  | ATP synthase Beta Subunit                 |
| <b>GST</b>         | F: TCGCTGCAGCAGGAGTGGAGT<br>R: CCACCATGGGCACTTGGTCAAA | K01931.1                  | Glutathione S-transferase                 |
