# Supplementary material
Source: PubMed Central journal article supplement (PMC3536903)
Supplement: supp_M112.020651_mcp.M112.020651-5.pdf [file supp_M112.020651_mcp.M112.020651-5.pdf]

**Supplemental Table S2. Identification of PRPs by LC-MS<sup>E</sup>**

| Acc.No.       | Protein name                             | MW (KDa) | pI     | PLGS Score | Peptides (whole database) | Peptides (Single database) | Unique peptides | Coverage (%) |
|---------------|------------------------------------------|----------|--------|------------|---------------------------|----------------------------|-----------------|--------------|
| <b>D3ZGY4</b> | Glyceraldehyde 3 phosphate dehydrogenase | 35800    | 7.737  | 1133.457   | 3                         | 52                         | 3               | 12.9129      |
| <b>P63039</b> | 60 kDa heat shock protein mitochondrial  | 60917    | 5.8044 | 48.5405    | 6                         | 113                        | 7               | 15.1832      |
| <b>P56574</b> | Isocitrate dehydrogenase NADP            | 50934    | 8.851  | 137.8497   | 10                        | 95                         | 35              | 25.885       |
| <b>P07895</b> | Superoxide dismutase Mn mitochondrial    | 24658    | 9.0509 | 101.7715   | 3                         | 47                         | 10              | 10.3604      |
| <b>P51635</b> | Alcohol dehydrogenase NADP               | 36482    | 6.9456 | 95.5803    | 2                         | 82                         | 23              | 7.6923       |
| <b>F1LP05</b> | ATP synthase subunit alpha               | 59775    | 9.572  | 155.1342   | 11                        | 169                        | 1               | 19.5298      |
| <b>P10719</b> | ATP synthase subunit beta mitochondrial  | 56318    | 5.0198 | 51.5456    | 6                         | 66                         | 10              | 17.2023      |
| <b>P04764</b> | Alpha enolase                            | 47098    | 6.1377 | 45.9096    | 5                         | 122                        | 00              | 11.7512      |
| <b>P16617</b> | Phosphoglycerate kinase                  | 44509    | 7.9043 | 97.3903    | 9                         | 88                         | 23              | 27.5779      |
| <b>P42123</b> | L lactate dehydrogenase B chain          | 36589    | 5.6274 | 70.4556    | 3                         | 94                         | 17              | 10.241       |
| <b>P04636</b> | Malate dehydrogenase mitochondrial       | 35660    | 8.8239 | 84.2337    | 4                         | 86                         | 7               | 16.2722      |
| <b>4903</b>   | Glutathione S transferase alpha 1        | 25542    | 9.1703 | 384.1361   | 11                        | 81                         | 00              | 21.1712      |

---

|                    |                                                                  |        |        |          |    |     |    |         |
|--------------------|------------------------------------------------------------------|--------|--------|----------|----|-----|----|---------|
| <b>P00884</b>      | Fructose<br>biphosphate<br>aldolase B                            | 39593  | 8.4326 | 78.8326  | 1  | 131 | 3  | 3.5714  |
| <b>P06685</b>      | Sodium<br>potassium<br>transporting<br>ATPase subunit<br>alpha 1 | 112554 | 5.1398 | 114.518  | 11 | 178 | 16 | 10.4594 |
| <b>P10860</b>      | Glutamate<br>dehydrogenase<br>1 mitochondrial                    | 61377  | 7.9801 | 56.1638  | 5  | 123 | 23 | 14.3369 |
| <b>Q68FU3</b>      | Electron<br>transfer<br>flavoprotein<br>subunit beta             | 27670  | 7.83   | 57.4798  | 2  | 60  | 19 | 12.9412 |
| <b>Q5XIF6</b>      | Tubulin alpha<br>4A chain                                        | 49892  | 4.5903 | 246.3592 | 15 | 73  | 11 | 33.1081 |
| <b>Q9WVK<br/>7</b> | Hydroxyacyl<br>coenzyme A<br>dehydrogenase<br>mitochondrial      | 34425  | 8.8932 | 100.3093 | 2  | 54  | 19 | 9.1954  |

---
